# Supplementary material for: Global Proteome Profiling Revealed the Adaptive Reprogramming of Barley Flag Leaf to Drought and Elevated Temperature
Source: Cells. 2023 Jun 22;12(13):1685. doi: 10.3390/cells12131685 (PMC10340373; doi:10.3390/cells12131685)
Supplement: Supplementary file 1 [file cells-12-01685-s001.zip › Table S1.xlsx]

## Sheet: Sheet1
Table S1. Abundances of proteins in 154 samples classified according to genotype, flag leaf size, time point and treatment
Genotype:	MCam109	MCam109	MCam109	MCam48	MCam48	MCam53	MCam53	MCam67	MCam67	MCam71	MCam71	MCam91	MCam91	MCam91	MCam99	MCam99	MCam99	MCam109	MCam109	MCam109	MCam48	MCam48	MCam48	MCam53	MCam53	MCam53	MCam67	MCam67	MCam71	MCam71	MCam71	MCam91	MCam91	MCam91	MCam99	MCam99	MCam99	MCam109	MCam109	MCam109	MCam48	MCam48	MCam48	MCam53	MCam53	MCam53	MCam67	MCam67	MCam67
Flag feaf size group:	2_Medium	2_Medium	2_Medium	2_Medium	2_Medium	2_Medium	2_Medium	3_Large	3_Large	2_Medium	2_Medium	1_Small	1_Small	1_Small	1_Small	1_Small	1_Small	2_Medium	2_Medium	2_Medium	2_Medium	2_Medium	2_Medium	2_Medium	2_Medium	2_Medium	3_Large	3_Large	2_Medium	2_Medium	2_Medium	1_Small	1_Small	1_Small	1_Small	1_Small	1_Small	2_Medium	2_Medium	2_Medium	2_Medium	2_Medium	2_Medium	2_Medium	2_Medium	2_Medium	3_Large	3_Large	3_Large
Time point:	T1	T1	T1	T1	T1	T1	T1	T1	T1	T1	T1	T1	T1	T1	T1	T1	T1	T2	T2	T2	T2	T2	T2	T2	T2	T2	T2	T2	T2	T2	T2	T2	T2	T2	T2	T2	T2	T1	T1	T1	T1	T1	T1	T1	T1	T1	T1	T1	T1
Treatment:	C	C	C	C	C	C	C	C	C	C	C	C	C	C	C	C	C	C	C	C	C	C	C	C	C	C	C	C	C	C	C	C	C	C	C	C	C	D	D	D	D	D	D	D	D	D	D	D	D
Accession (Uniprot ID)	Abundances_Scaled___F132__Sample	Abundances_Scaled___F133__Sample	Abundances_Scaled___F134__Sample	Abundances_Scaled___F1__Sample_C	Abundances_Scaled___F2__Sample_C	Abundances_Scaled___F19__Sample_	Abundances_Scaled___F20__Sample_	Abundances_Scaled___F41__Sample_	Abundances_Scaled___F42__Sample_	Abundances_Scaled___F62__Sample_	Abundances_Scaled___F63__Sample_	Abundances_Scaled___F85__Sample_	Abundances_Scaled___F86__Sample_	Abundances_Scaled___F87__Sample_	Abundances_Scaled___F109__Sample	Abundances_Scaled___F110__Sample	Abundances_Scaled___F111__Sample	Abundances_Scaled___F135__Sample	Abundances_Scaled___F136__Sample	Abundances_Scaled___F137__Sample	Abundances_Scaled___F3__Sample_C	Abundances_Scaled___F4__Sample_C	Abundances_Scaled___F5__Sample_C	Abundances_Scaled___F21__Sample_	Abundances_Scaled___F22__Sample_	Abundances_Scaled___F23__Sample_	Abundances_Scaled___F43__Sample_	Abundances_Scaled___F44__Sample_	Abundances_Scaled___F64__Sample_	Abundances_Scaled___F65__Sample_	Abundances_Scaled___F66__Sample_	Abundances_Scaled___F88__Sample_	Abundances_Scaled___F89__Sample_	Abundances_Scaled___F90__Sample_	Abundances_Scaled___F112__Sample	Abundances_Scaled___F113__Sample	Abundances_Scaled___F114__Sample	Abundances_Scaled___F138__Sample	Abundances_Scaled___F139__Sample	Abundances_Scaled___F140__Sample	Abundances_Scaled___F6__Sample_D	Abundances_Scaled___F7__Sample_D	Abundances_Scaled___F8__Sample_D	Abundances_Scaled___F24__Sample_	Abundances_Scaled___F25__Sample_	Abundances_Scaled___F26__Sample_	Abundances_Scaled___F45__Sample_	Abundances_Scaled___F46__Sample_	Abundances_Scaled___F47__Sample_
P05698	156.6	72.7	180.9	113.1	68.4	173.2	118.3	85.9	63.3	51.9	72.2	44.8	96.5	103.9	28.2	86.3	32.4	110.9	53.8	93.5	255.9	112.1	48.3	173.8	78.5	176.6	112.4	63.1	209.9	89	198.9	233.7	46.6	79.7	118.2	163.7	138.4	41.3	90.7	155.9	153.8	101.2	29.2	236.3	47.3	173.6	298.9	240.2	73.6
S4Z0F2	143.5	68.7	175.4	71.3	55.7	189.7	93.9	63.6	61.3	48.3	70	37.5	72.7	97.2	27.8	78.3	21.3	97	40.4	87.8	289.5	70.2	43.3	248.5	76.5	214.5	106.9	73	181.7	79.2	163.3	165.4	35.2	50.6	117.8	134.5	110	75.1	110.8	128.8	108.3	90.3	36.1	225	35.3	155.9	311.6	210.9	60.1
A0A287NMR6	138.6	120.9	138.2	99.1	88.1	122.7	90.9	80.9	87.4	77.9	94.1	123.4	93	107.9	117	100.5	83.4	97.7	85.6	117.7	178	109.5	98.3	101.8	80	110.1	100.2	83.3	127.2	95.1	118.3	137.4	81.1	116.5	105.2	113.9	118.3	71.9	107.7	121.6	113	105.2	83.4	145.2	124.2	122	158.1	138.7	103.7
M0VRL8				395	326.2	344.9	312.5											321	269.4	306.5	704	227.5	1079.4												299	341.1	280.7
M0Y1R9	127.1	87.3	83.9	67.8	37.2	329.4	157.9	73.8	67.4	34.4	29.7	115	77.9	75.1	42.7	55.7	36	40	50.6	40	151.5	68.7	59.4	101.9	64	215.2	47.8	44.1	101.8	87.2	160.7	198.7	103.9	130.5	101	126.9	116.2	53	46.3	86.5	65.2	74.6	36	420.6	107.2	206.6	288.7	169.7	62.9
A1EA16	54.3	153.6	167.6	147.4	87	1800	104	44.6	142.9	895.2	106.8	38.8	33.8	36	79.1	76.9	41.8	23	36.8	50.8	35.5	37.8	15.9	77.6	33.4	98.3	15.3	84.7	68.5	199.5	84.3	100.7	47.2	27.5	122.6	124.7	34.9	15.8	5.1	56.5	37.5	176.3	27.8	65.8	9.1	40.7	60.8	105.1	84.1
A0A287VK33	179.3	79.4	162.6	100.7	55.9	155.3	108.6	75	58.8	39.9	58.4	46.1	81.6	84.1	28.8	74.7	26.9	90.7	50.4	85.5	291.4	111.2	70.5	187.9	75.1	170.3	101.9	69.7	160.2	73.4	206.1	198.3	50	85.1	96.5	114.5	113.2	80.1	102.9	167.7	163.1	101.6	62.2	207.9	54.9	160.3	287.3	175.4	67.7
M0Z2X3	135.5	79.7	145.6	104	65.5	138.4	124.2	66.6	64.1	52.8	74.4	35.4	84.3	99.7	34	99.4	36.1	103.3	48.6	85.6	327.3	95.3	51	242.1	91.8	218.4	96	68.2	192.5	64.8	160	162.5	39.3	60.3	111.8	136	112.1	54.5	99.4	138.4	128.2	92.9	46	217.4	40.6	145.3	279.3	191.4	64.6
A0A218LNH3	152.5	88.8	187.2	79.5	55.3	154.9	110.5	73.6	68	62.2	77.8	42.8	77.1	97.4	34.4	96.7	32.4	101.7	52	91.8	299.2	77.1	52.6	251.5	88.3	204.2	106	72.1	189.5	72.5	172.2	162.9	41	53.5	112	128	107.5	37	110.5	119.5	108	89.6	31	229	49.8	164.9	293.7	171.2	77.7
A0A287U6Y1	136.3	68.8	116.9	75.8	51.9	116.4	95.1	76.9	85.3	73.3	99.4	88.8	127	114.1	43.5	75.2	67.5	85.6	95.3	94.8	147.8	74.8	44.1	143.5	114.1	134.1	92.3	96.2	112	101.1	113.7	128	70.3	81.3	89.7	99.4	92.9	73.7	119.9	97.6	82.5	95.3	58.1	145.2	90.9	103.2	163	123.9	127.7
A0A287HCW5																								765.4	753.7	865.5									325.9	271.7	383.8										559	454.1	651.2
A0A287N7L4	150	68	157.2	77.4	48.3	125	80.2	52.2	42.5	31.5	45.4	44.4	69	74.6	35.8	66.7	34.6	99.7	52.3	89	311.7	108.3	84.2	185.3	63.9	148.1	89.5	53.8	161.2	69.8	148.6	178.4	50.1	70.2	92	110.4	95.4	83.7	121.8	154.1	153.5	92.9	61.1	202.7	56.9	153.4	288	163.8	69.3
A1E9T2	218.2	250.7	229.8	177.2	202.4			152.4	143.5	186.7	177.1	183.9	209.9	377.2	122.6	84.2	108.5				1096.9	816.6	133.7	64.1	238.4	375.4	143.1	173	105.9	106.1	115.1				69.3	102.3	96.8	97.7	118	63.9	121.9	103.9	103.8
A0A287QTF6	140.3	69.9	227.2	184.5	67.1	176.5	86.3	87.9	57.7	46.8	66.7	59.3	95.9	91	25.8	91.9	33.4	104.7	59	128.5	285.3	147.6	38.5	308.2	70.9	160.2	176	62	191.5	96.1	197.6	200.6	53.8	95.2	115.1	165.2	192.8	19.7	99.4	154	140.5	126.7	23.6	236.4	50.1	174	287.3	224.3	82.4
F2D714	153	67	171.7	93.3	59.6	142.1	109.2	67.1	67.5	43.8	72.7	52.4	92.3	91.2	30	84.9	31.6	108.4	67.1	113.7	267.8	95.5	42.6	189.8	81	155.2	106.3	80	171.1	72.1	161.5	186.2	48.7	69.7	104.9	142.2	108.7	26	136	143.2	144.7	100.7	30.5	214	50.7	156.2	254.4	184.6	80
M0UNI8	62.9	85.2	63.2	39.1	65.3	56	73.5	66.2	120.4	86.3	60.4	93.2	63.5	83.3	51.5	56.4	71.6	85.6	114	88.6	42.8	55	55.3	68.2	77	54.7	86.5	113.7	59.7	61.9	63.8	67	82.8	58.5	48.7	59.3	44.4	97.7	95.8	88	63.7	107.7	76.1	79.7	93.8	66.4	66.2	55.6	128.4
M0W433	148.9	72.7	167.8	95.1	64.7	137	100.1	64.7	55.3	40.2	74.2	60.8	82.7	89	21	86.3	28.8	109.8	48.3	100	331.2	120.9	54.2	196	75.2	148.6	114.7	52.7	197.1	77.5	167.6	231.3	55.9	82.2	96.7	117.1	98.9	33.2	120.6	155.1	154.6	107.3	26.6	201.9	54	163.7	306.8	175.9	77.4
F2CPQ0	105.3	161.7	110.7	81.8	126.9	64.8	72.9	109	123.9	114.8	71.5	115.4	106.9	150.3	113.2	134	106.7	127.2	142	125.4	73.3	87.9	110.4	68	93.8	67.7	82.6	140	101.4	111.7	79.1	86.2	94.3	112.1	98.7	118.7	77.1	186.4	114.1	84.6	115.7	97.4	132.2	51.6	101.2	61	47.2	74.2	76.3
F2DQX8	95.3	85.4	68.2	64.3	83.5	96	73.4	99.3	93.1	105.9	106	133.2	96	96.1	82.6	81.8	96.4	74.6	162.4	126.9	59.8	85.5	101.1	60.1	96.4	53.5	116.6	89.8	95.3	100.6	106.5	109.9	153.3	81.2	84	62.1	77.1	108.6	121.6	92.3	61.1	127.6	109	110	149.6	122.1	93	81.6	156.9
F2CZ95	131.8	69.5	211	210.2	64.7	209.6	151.1	72	48.5	54.7	80	38.4	87.9	81.4	21.4	109.7	33.3	100.7	37.5	110.2	322.5	156.2	40.6	331.6	73	155.3	135.5	56.1	251.4	70.7	220.5	183.3	42.4	86.7	113.3	173.9	199.6	19.3	78.3	185.6	131.5	109.9	28.1	288.7	45.1	192.2	305.1	233.8	68.4
P13564	244.5	57.6	164.3	82.8	38.3	163.1	77.5	64.7	58.1	33.6	53.7	50.4	67.7	76.6	17.9	72.2	23.4	78.6	76.5	93.9	234	87.1	34.3	186.5	65.3	180.1	112.1	58	136	101.1	208.8	228.7	41.7	65.1	95.4	104.2	117.6	51.7	133.4	141.8	137.1	114.3	42	237.4	55.5	172.5	319.2	200.6	79.4
F2CWJ3	139.2	74.4	156.5	90.2	68.6	147.3	130.9	73	68.3	55.6	74.5	41.5	83.1	106.7	31.4	101.3	29.7	111.9	41.8	87.7	340	94.7	46.1	234.1	85.9	209.1	117.6	89.2	197.4	70.3	159	165	34.2	68.2	118.3	133.6	97.7	32.8	139.8	143.1	146.1	101.6	28.7	213.3	43.8	153.3	305.8	174.1	88.6
F2EJL5	102.7	93.9	80.7	72.1	84.9	76.7	60	68.8	73.7	92.8	74.7	127.7	90	92.2	95.2	119.7	100.8	93	146.7	111.2	73.8	99.7	99.1	79.8	78.6	78.9	87	95.3	103.9	95.8	85.3	116.1	132.6	111.1	83	65.2	71	106.8	96.8	103.3	93.3	102.7	92.7	88.3	131	101.6	63	65.9	108.1
A0A287I5P1	67.4	87.1	86.1	72.4	89.3	122.1	97	164	104.8	99.8	118.8	136.4	144.6	95.3	91.8	98.1	109.7	140.2	137.7	122.2	73.4	121.6	134.8	79.1	148	89.6	149.2	131.5	77.6	230.2	96	95.4	131.4	162	71.7	66.7	63.6	150.6	89.5	93.5	91.9	88.7	75.1	92.1	132.6	84.7	81.6	106.1	103.2
A1EA34	151.5	101.8	204.8	60.8	54.5	174.4	147.8	64.8	63.9	47.4	65.3	40	79.7	106.5	22	79.6	30.2	114.2	61.4	97.7	262.1	64	49.9	230.6	85.7	194.7	105.8	79.5	226.6	78.5	143.4	147.9	42.3	58	132.2	144	114.3	61.7	95.8	126.4	101.1	80.2	42.1	244.6	46.7	166	260.2	194.1	69.5
F2ECL6	63.9	81.1	86.1	57.3	58.7	66.7	53	63.1	92.4	28.5	40.1	95.5	84.4	94.6	93.6	96.3	80.5	103	74	84.4	144.7	66.3	127.9	116.2	62.6	116.7	81.8	79.4	86.1	75.7	61.5	67.9	76.9	143.7	55.2	65.7	45.2	128	91.2	99.9	101.6	80.9	58.6	66.5	68	64	89.8	61.8	54.2
F2CVM1	94.3	63.8	132.2	73.2	53.7	109.8	97.8	37.7	29.9	26.2	34.7	37.2	46.7	65.4	41.4	83.1	31.4	104.3	58.4	85.5	240.4	99.5	89.1	156.6	58.3	120.7	78.4	45.1	139.5	71.5	125.2	127.2	45.6	53.7	110	130.1	113.1	94.5	76.7	111.6	104.7	69.9	65.1	171.6	56.7	103.4	228	117.3	61.9
A1E9V0	90	86.7	264.8	76.7	49.9	166.1	205.8	76.6	78.3	59.9	69.8	31.2	98	114.9	9.5	96.5	15	132.7	72.9	98.6	297.7	79.9	31.2	222.4	101.8	209.5	102.5	76.8	274.9	83.3	123	101.1	58.8	38.6	135.2	229.2	121	28.4	120.4	155.2	127.2	65.5	32.1	191.6	49.8	134.5	219.4	183.4	49.4
S4Z0U7	145.3	77	193.6	64.3	41.2	191.2	123.8	54.5	57	49	63.5	31.4	74.9	104.1	29.9	104	31.8	112.5	36.5	102.1	404.3	74.4	54	397.2	85.1	265.4	101.5	69.4	226.1	81.6	155.7	143.8	38.6	48.7	135.8	156.9	109.8	58	101	107.7	88.7	79	45.5	271.1	96.6	162.3	293.4	178.4	72.6
A0A287NGA7	158.8	72.6	202.3	114.7	63.2	152.7	118.2	66.2	51.1	43.7	61.1	36.8	84.1	95.3	24.4	102.6	24.8	123.6	50	107.2	385.3	109.1	47.7	271.4	67.8	195.2	107.4	63.5	174.6	62	171.6	201.4	36.7	71.2	114.5	135.6	116.2	38.5	99.2	152.6	162.7	106.3	34.8	221.6	37.1	174.6	299.8	195.7	70.2
F2E555	100.8	139.4	69.4	94.1	123.7	83.6	126.1	123.3	160.7	185	152.6	103.2	109.4	138.9	161.7	126.7	138.2	125.8	105.4	86.9	79	98.7	112.1	63.3	120	84.7	82.4	136.9	95	90.6	95.2	86.3	95.8	123.9	105.1	83.4	72.3	102.4	90.6	77.2	91.7	88.6	135.5	71.8	100.8	86.4	69	80	119.8
M0YGB0	140.1	66.6	162.4	78.1	48.4	132.7	110	46	39.1	26.2	37.4	29.4	57.3	62.3	46.6	108.4	34.8	130.1	43.3	98.5	308.9	123.9	54.6	220.7	58.8	167.9	92.6	59.2	162.7	68.3	162.9	152.6	39.3	68.4	120	112.1	116.8	60.4	75.5	140.4	109.4	84.8	36.8	224.1	81.1	159.4	317.6	233.3	110.7
F2CYA5	86.8	97.5	77.6	43.2	78.1	93.2	88.5	83.5	138.5	135.2	127.4	142	139.9	154	118.7	135.4	139.4	100.1	141.1	76.1	90.8	47.1	57.8	99.2	131.2	116.9	101	177.3	121.3	91.9	103.9	106	109.8	93.3	82.5	53.1	38.1	123.9	119.7	68.3	97.6	97.7	105.4	75.9	83.8	86.5	62.6	80.4	125.5
F2E8I0	93.6	66.4	59.3	56.5	55.2	45.2	32.1	79.7	69.5	42.3	39.5	87	59.1	59.2	67.7	74.8	82.2	48.1	72.3	56.9	57	87.2	62.8	48.6	50	50.2	55.1	44.4	44.2	90.9	68.9	60	83.2	87.2	46	62.8	53.7	87.7	96.5	116.3	92.4	103.9	80.6	52	80.9	60.8	51.9	60.7	88.8
A0A287DV95	195.1	209.4	139.1	158.1	132.8	262.5	2.4	60.2	12.2	60.4	56.1	928	6.5	47.5	95.9	114.9	463.3	215.2	125.7	612.7	11.8	53.2	28.4	18.5	18.9	6.4	75.7	3.7	115.4	58.6	77.2	222	192	185.1	17.1	29	97.5	6.5	71.5	65.8	181.2	159.2	93.2	147.3	67.8	147.9	42.9	32.4	92.1
M0X9F6	85.7	154.3	100.6	112.5	125.6	86.4	225.1	121	206.4	190.8	211.9	94.8	163.4	182.2	206.3	171.3	138	126.5	83.5	78.8	126.7	80.3	113.9	108.6	163.3	147.4	92.8	178.4	164.9	84.7	82.4	70.1	67.5	105	142.1	133.1	104.3	107.4	126.2	88.7	72.1	54.9	100.4	70.3	88.4	66.2	92.7	95.5	138.1
M0WMM0	92.7	138.8	97.7	140.5	147.4	92.7	107.9	127.7	112.1	147.5	123.3	128.5	166.2	128.2	140.8	134.2	153	99.3	117.1	102.9	110.7	126.4	143.3	91.7	107.7	98.8	110	129.4	100.3	129.9	80.6	86.9	144.8	115.6	128.9	113.9	141.6	140.3	64.5	83.6	103.9	114.5	130.1	65.2	114.4	76.6	78.6	87.2	110.8
F2EB29	148.2	59	170.9	97.9	53.1	149.5	93.5	65	53.6	30.3	49.7	31.6	69.3	81.2	25	80	26.9	115.1	49.2	100.6	354.4	109.3	46.5	222.3	70.7	184.8	115.8	52	163.1	59.6	142.2	181.9	36.5	58.2	123.6	106.5	127.4	40.8	86.3	152.8	130.1	74.4	18.6	238.4	38.7	151.5	295.9	191.3	78.6
A0A287J8S5	137.9	77.8	140.5	86.8	61.5	154.3	123.2	47.8	43.8	48	63.8	55.3	66.3	76.5	43.5	77.3	35.6	100.7	50.9	68.3	285.5	75.1	135.1	185.8	61.5	170.7	75.6	50.2	169.6	72.1	174.5	165.3	54.6	59.6	101.1	105	91	108.7	85.4	132.1	117.5	96.5	84.4	208.3	84.7	131.6	299.7	155	76.2
A0A287LU91	95.6	66.4	89.1	92.9	59.8	95.4	75.1	112	75.9	72.4	71.2	118	93.1	75.8	67.1	60.9	73.8	72.3	163.8	105	48.8	93.7	79.6	53.4	65.5	71.4	107.8	72.1	57.7	85.4	81.6	123.7	129.3	133	61.7	86.8	96.7	172.4	110.4	108.1	99.4	112	75.8	78.6	148	99.2	90.8	96.2	119.8
F2D5G5	146.9	98.2	159	60.4	38.9	115.9	105.2	103.7	94.4	33	44.3	56.4	51	46.2	6.1	7.8	7.2	82.7	65.8	89.3	178	75.8	62.8	43.7	38.8	59.9	119.3	97.8	167.8	119.1	160.8	156.3	82.9	87.3	83.3	98.8	91.3	54.5	169.7	120.8	110.2	105.1	67.5	257.5	104.2	177	235.1	183.2	123.8
M0XMF8	93.2	71.3	89.6	85.9	75.8	125.5	61.2	156.1	77.9	64.2	78.4	155.2	92.5	60.2	81	39.7	89.4	71.8	124.4	144.1	51.2	116.1	115.5	49.7	91.8	73.9	126.2	60.8	77	176.6	94.7	96.8	152.6	156.2	54.7	51.3	90.1	165.5	78	100.6	149.6	88.8	75.6	86.9	159.3	67.2	62.1	125.7	104.9
A0A287IID6	85.4	136.6	80.9	88.6	101.3	89.8	81	105.8	128.3	114	102.7	120.3	112.8	536.7	142.3	99.5	98.3	92.4	93.2	86.5	76.8	75.5	118	64.2	107.1	85.4	93.7	138.6	118.5	80.2	64.4	89.2	95.6	87	93.4	88.3	80.2	124.5	86.7	77.1	90	70.6	108.8	69.7	139.8	82.2	55.1	79.7	98.6
A3RHG5	36.7	60.1	14.6	10.6	27.7	7.1	17	11.5	10.7	18.1	11.8	8.7	9	23.7	21.4	18.4	16.1	20.7	12.7	12.3	19.8	7.7	17.9	19	17.6	12.4	10.5	23.2	27.4	5.5	7.5	17.7	25	11.3	14.9	23.4	9.6	31	34.7	94.5	23.9	8	23.9	9	13.5	15.6	13.7	13.7	23
M0Z065	136.2	39.7	176.9	83.4	28.9	145.9	160.9	12.9	11.9	24	52.3	44.2	60.9	67	65.8	62.2	75	76.3	47.1	98.2	274.9	100.8	256.7	109.3	33.2	68.5	31.3	20.2	162.7	57.1	137.8	177.7	54.4	40.6	128.1	143.9	117.7	183.3	87.7	176.7	94.3	74.1	77.2	304	224.7	185.8	275.8	218.3	90.3
A0A287QT87	151.6	79.6	175.7	95.8	49.8	165	127.9	64.9	45.9	41.6	49.5	36	72.5	80	23.1	80.5	18.3	101.5	46.1	97	368.9	98.8	82.7	267.7	61.3	222.7	126.5	109.7	188.6	82.5	216.6	179.7	50.2	68.1	98.3	132	108.5	71.9	96.2	150.3	149.6	100.2	65.9	226.5	53	168.3	309.3	183.4	81
P62162	74	133.3	77.3	98.5	100.8	84	90.8	102.8	93.9	124.7	82.1	88	127.8	148.1	141.3	82.9	108.4	109.9	184.8	123	76.1	87.3	118.8	61.8	110.9	83.9	92.2	116.8	94.7	113.3	41	76	106.8	112.2	101.7	137.3	95.5	233	79.6	62.2	101.2	87.3	110.8	62.5	142.9	58.4	50.7	88.2	84.9
F2CS21	45.7	186.5	95.2	84.3	210.1	83.7	187.6	102.6	91.8	158.7	84.6	76.9	92.1	120.2	177.1	158.2	144.2	133.7	132.1	108	76.1	75.4	152.8	62.1	123.1	49.9	80	138.4	153.2	69.8	46.6	47.4	66.3	146.5	103.8	101.6	93.7	140.9	46.1	63	73.5	56.9	204	52.1	165.4	45.4	37	76.6	58.9
F2CVI3	71	97	79.1	95.9	100.3	119.8	116.7	132	122.6	94.1	120.4	97.6	128.9	85.7	95.4	111.3	103.4	86.8	103	93	92	146.5	113.7	121.9	123.6	137.4	108.6	103	85.4	127.4	86	100	95.3	122.9	93.9	68.6	78.2	89.4	73.2	72.7	95.1	99.5	101	100	128.7	126.1	109.9	71.6	131.2
A0A287VF44	144.2	114.8	139.9	227.3	136.7	117.6	163.4	62.3	73.7	76.3	94.1	71.2	103.7	101.4	73.4	92.5	54.4	82.8	50.9	53.6	284.3	147.2	159.1	110.1	62.8	99.1	47.4	47.8	114.1	77.5	135.2	110.1	82.4	68.3	168.8	218.3	215.4	64.1	60.7	88.6	139.7	113	81.3	118.3	74.5	93.1	218.8	153.7	112.8
A3RHE3	13.1	12.8	7.7	10.2	2.9	41.2	18	2.8	5.6	6.2	7	8.3	2.3	2.7	4	5.8	4.2	3.5	1.7	3.2	8.8	6.6	5.3	16	11.5	12.1	6.1	3.6	10.4	6.3	11.2	90.8	23.2	29.1	3.4	5.2	4	7.8	5.5	4.5	26.1	19.7	21.3	23.3	55.9	26.3	9.8	7.1	16
A0A287GMU8	128.8	96.3	241.4	97.1	68.6	171.7	101.4	74.7	53.3	40.8	43.7	57.4	63	99.8	15.1	140.5	19.2	112.6	43.9	149.2	479.2	83.8	24.5	599.3	81.1	371.1	179.1	65.9	157.5	111.6	147.9	190.6	30.7	71.5	113.8	112.6	125.1	30.4	198.2	101.8	97.8	130.1	20.8	277	39.8	147.3	400.3	101.5	104.6
M0YA87	115.2	88.4	73.3	56.2	85.3	173.6	120.7	109.2	71.1	116.8	95.7	176.1	118.8	87.8	83.4	76.4	101.1	73.1	131.7	120.7	67.9	111.7	99	67.3	101.2	56.5	99.4	75.1	161.5	149.6	141.4	131.2	185.2	114.8	92.5	50.6	92.5	75.1	109.1	122.5	99.7	179.5	97.1	134.3	168.3	62.7	97.9	72.9	227.6
F2CSM9	112	147.1	101.3	63.8	80.3	90.9	81.3	119.6	135.7	97.2	81.9	130.8	146.4	161.5	129.7	139.5	107.1	134.5	156.9	118.7	61	61.7	73.1	80.3	111.2	136.3	128.9	202.6	81.3	87.9	74.7	72.7	83.5	104.7	91.3	82.8	61.1	191.6	126.2	93.7	82.5	65.4	85.4	73.6	117.6	96.1	89.1	104.8	124.7
A0A0S1LGH4	26	69.4	13.8	21.3	8.6	49.1	9.3	7.1	8.7	12.9	12.3	3.8	7.4	27.3	9.9	8.5	4.1	16.4	1.6	7.7	8.5	28.1	23.3	6.9	17.4	6.9	6.6	8.4	30.1	6.4	11.7	84.5	11.5	19.4	5.9	12.7	5.4	23.3	3.1	77.2	62.7	42.8	17.3	12.1	49.4	27.8	15.7	15.4	27.8
A0A287M195	149.3	74.9	180.4	106.5	64.8	171.6	104.1	77.1	59.7	45.8	70.2	49.2	91.2	99.8	25	97.4	30.4	117.3	48.5	97.4	371.3	108.5	41.8	246.3	84.1	214.8	112.9	60.5	190.1	66.8	219.7	204	51.6	82.1	103.7	134.3	125.4	57.4	108.8	150.8	138.4	106.9	40.6	253.9	42.6	170.7	340.9	189.3	101.4
F2DD14	133.5	95.7	158.6	95.2	67.2	162.5	152.5	68.4	49.6	41.3	63.1	57.3	65.3	99.2	41.9	82.7	26.4	108.9	49.9	80.2	321.2	111	114.7	209.9	78.7	187.3	115.9	71.6	206	95.6	178.2	205.3	61.1	69.6	125.1	145	108.4	93.9	93.8	144.8	145.5	83.8	91.7	248.4	77.6	175.2	285.5	179.2	74.4
A0A287VDK5	149.4	79.4	190.6	71.7	57.3	175.5	142.8	75.1	45	37.5	39.7	40.3	67.1	60.1	35.2	59.3	32.9	98.8	59.3	99.2	227.9	100.6	70.1	173.2	62.8	212.4	113.1	81.9	137.3	71.5	205.4	197.4	54	75.3	86.1	118.7	105.7	88.9	137.6	159.5	118.1	87.5	59.7	268.2	58.4	180.4	316.2	208	102.7
F2CR16	170.6	66.9	141.4	91.9	74	130.4	111.2	54.4	53.6	45.3	48.8	87.3	66	80.2	37.3	88.9	33.8	107.9	40	70.7	351.9	100.2	99	205.3	80.6	194.3	98.2	64.7	173.8	76.9	192	213.9	74.3	58.9	104.2	134.6	102.7	52.5	86.6	124.4	122.7	97.5	57.8	194.6	44.6	149.2	305.7	164.4	94.9
A0A218LNI3	155.7	101.9	224.8	90	54.3	177.5	93.4	72.7	59.4	46.6	68.2	28.5	54	110.5	43.2	90.7	30.7	121.5	46.1	118	331.6	72.3	44.8	423.6	90.5	240.4	155.7	88.4	219.8	81.3	156.1	139.7	41.2	56.4	106.7	165.4	116.3	57.2	98.1	125.8	96.7	85.8	27.3	256.6	51.3	171.8	275.3	175.3	63.7
A0A287PA65	123.3	97.9	72.5	91.3	112	121.8	106.2	127.7	62.7	100.6	79	143.5	69.1	100.4	78.9	86.2	70.8	74.9	111.7	109.6	66.7	107.8	121.3	68.2	96.5	58.1	104.9	70.5	127.6	155.9	93.6	130.7	137.6	146.9	75	94.4	92.9	115.4	80.1	126.8	118.6	121.4	130.9	99.7	142.3	87.8	73.8	87	113
M0YZ71	63.4	64.2	37.9	151.6	68.7	109.9	76.5	128.2	68.1	106.3	178.5	162.8	100.1	74.6	63	70.9	125.5	59.6	188.2	94.8	41.1	85.9	149.6	57.1	69.5	20.6	84.2	58.1	102.7	134.5	98.8	63.4	144.4	105.5	88.6	129.7	131.2	100.9	125.1	88	132.4	106.5	96.4	72.1	141.4	69.8	93.3	90.3	110.6
M0YPY5	144.2	104.6	192	77.3	56.5	154.5	102.4	52.3	40.7	33.6	47.5	52.7	74.7	92.7	34.6	69	31.6	108.9	49.4	97.2	279	102.4	88.8	177.7	83.2	179.6	94.3	64.7	165.4	94.6	159.3	142.8	63.8	65.9	110.5	150.8	114.4	113.8	93.8	123.9	116.8	75.2	43.1	210.8	71.3	153.2	267.2	198.3	72.2
F2E9F1	160.3	74.9	243.6	93.3	46.7	126.9	104.1	71.5	65.3	43.1	55.2	21.5	60.8	92.6	20	95.9	43.7	122.7	37.9	121.2	330	50.3	28.1	514.3	98.1	237.7	180.7	72.6	243.2	109	157	130.9	23.5	56.7	158.3	161.5	110.4	19.8	128.5	130.4	112.6	114.6	29.6	208.6	41.4	168.4	356.4	176.4	67.3
A0A287SNX7	127.6	57	245.3	91.7	68.2	154.1	161.2	48.9	70.4	102.4	83.4	29.6	26.1	71.2	30.4	92.9	18.9	90	41.9	76.9	298.3	40.9	90.1	724	128.5	255.3	124.5	127.6	363.2	81	235	143.1	23.3	29.7	178.9	221.3	110.4	27.8	106.9	108.6	104.3	117.7	36.6	166.5	95.9	144.6	510.9	277.3	67.2
A0A287HWS1	169.8	73.1	185.1	68	44.3	164.5	118.5	50	44.3	37.6	40.9	43.3	63.8	89.4	29.3	68.2	23.9	90.8	59	84.4	253.5	64.7	37.3	224.9	73.5	167.1	86.9	59.8	163.6	70.5	195.7	179.6	77.1	73.1	103.7	137.8	103	86.4	108.5	132.7	107.7	79.3	54.6	251.6	79.4	208	277.2	204.6	101.9
A0A287T1H4	96.4	81.7	74.4	47.3	61.5	59.9	44.6	85.2	74.2	53.4	49.9	114.6	103.4	86.5	34.9	60.1	47.3	90.6	173.1	116.4	81.5	51.2	56.9	54.2	63.2	73.2	102.3	109.7	64	85.8	84.8	95.2	99.4	75.9	45.5	44.4	35.6	183.6	113	89.4	106.2	91.2	71	62.1	97.8	73.2	70.5	63.4	73.3
F2CTY2	147.7	115.1	177	77	48.9	119.4	111.5	51.3	53.3	40	47.1	46.1	60.1	76.7	40.5	79.7	40.3	93.1	38.2	74	287.3	80.8	68.1	191.4	73.7	181.2	84.9	62.7	166	72.4	182.6	192.5	71.5	60.6	94.6	127.1	92.2	89.9	90.5	130.9	121.6	83.4	74.6	192.6	112.9	158.5	291	161.6	93.4
M0VMI2
F2E8P3	138.8	87.2	195.5	120	74.1	149.8	153.6	99.8	75	64.7	94.1	51.2	108.9	117.5	39.3	92.8	39.7	120	54.5	114.3	266.9	114.4	70.9	171	97.8	157.8	104.9	72	238.7	79.9	140	159	44.1	66.4	151.1	266	171.1	45.6	80.6	135.9	159.3	77.1	37	216.6	53.6	186.9	189.7	276.8	63.9
F2D6Q1	142.7	145.9	131	80.8	87.1	166.6	156								152.5	141.1	127.5	100.4	104.2	115.4	217.9	220.3	173.2	490.9	155.3	319.4			197.6	192	148.8				98.6	65.1	67.7							216	33.8	102.7	520.5	234.9	324.5
A1E9R0	140.8	102.9	128.6	127.7	55	116.9	87.6	166	147.3	87.5	147.3	136.7	119.5	83.4	116.4	71.9	78.2	64	95.9	125.4	66.2	101.4	132.9	76.2	86.2	83.5	136.3	52.9				76.3	132.4	213.9	73.2	64	186.2	380.4	336.4	462.5	111.5	137.6	111.1	49.7	140	49.3	55.1	138.7	197.6
A0A287HT99	90.3	116.1	93.7	93.8	105.4	61.4	55	85.9	107.7	115.3	96.9	110.3	96.1	119.9	76.9	92.2	74	75.4	111	87.1	125.8	98.4	118.6	56.4	59	54.6	110.8	116.6	51.6	58.8	56.5	65.2	70.8	97.4	88.8	85.9	69.3	118.3	121.1	110.7	98	101.9	125.2	73	87.6	79.2	73	81.3	99.6
A0A287GMX5	154.7	92.8	215.5	79.5	54.3	148.1	138.5	63.2	53.8	56.1	51.7	22.3	73.3	88.2	26	72.3	27.5	135.7	43.9	132.4	296.5	85.2	51	426.9	103.8	184.2	123.2	62.4	225.4	67.2	149.2	137.1	28.4	53.8	113.6	147.7	121.7	60.9	113.3	151.9	105.2	109.3	29.9	188.2	36.1	116.6	359.9	222.7	63.6
F2CYZ1	78.9	95.2	77.2	89.6	111.8	119.6	77.3	146.6	86.3	126.9	131.8	149.8	130.6	109.1	119.7	85.7	121.1	99.2	116.6	118.2	52.7	121	140.9	65.5	122.5	77.5	103.6	108.9	110.3	156	83.2	93.6	149.3	138.9	86.9	84.9	91.3	127	68.1	82.2	112.4	77.7	104.3	83.2	171.3	94.4	60.4	108.4	95.2
F2DDU3	74.8	147.9	85.2	119.7	138	76.7	110.4	122.9	130.9	136.3	143.2	118.1	143	104.4	164	112.8	143.7	105.3	109.9	75.8	72.6	109.9	123.1	51.2	105.3	52.1	71	101.4	62.5	108.7	77.4	67.2	128.3	124.4	102.8	119.9	114.5	97.7	64.3	78.3	73.5	109.4	159.9	52.1	87.9	62.5	56.2	78.3	103.5
M0X0F4																								1994.8	2684	2416.9																		515.9	532	463	1499.1	1212.1	859.1
A0A287TFZ0	143.8	61.2	216.9	112.9	44.7	209.7	114.3	123.7	86.8	40.8	84.4	66.7	84	86.1	48.4	54.7	41.9	109.8	72	140.2	190.5	139.7	35.1	417.5	120.9	236.2	223.7	75.6	206.4	82.1	113.7	97.3	61.5	75.4	140.4	95.7	147.6	33	102.4	142.4	127.1	87.2	32.4	228.4	95.4	154	454.4	217.8	88.4
F2D6B1	81.3	77.8	62.5	119.4	67.9	98.2	74.8	89.9	65.8	73.6	77.9	116.8	90.5	64.2	106	68	83.1	48.5	87.6	81.7	56.7	126.2	96.5	42.2	69.2	44.4	89.8	62.3	75.4	90.3	72.7	85.4	137.5	127.1	92.2	98.6	136.1	81.5	67.9	123.7	112.5	101	111.5	78.9	124.1	84	62.7	66.6	86.1
A0A287IQT8	117	76.1	149.8	108.3	83.2	132.7	85.6	46.2	38.7	29.9	37	71.3	75.4	90.2	46.4	82.6	31.9	104.1	71.2	85.3	322.5	174	268.7	189.1	86.2	164.6	85.7	56.7	162.5	94.5	151.5	132.6	98.1	69.9	112.6	147.1	102.7	87.2	63.2	125.4	109.5	69.6	77.8	166.9	131.5	128.6	210.7	156.5	70.1
F2D4W3	84.9	72	90.2	80.2	69	76.7	77.3	52.1	51.2	11.1	14.6	38.7	36.8	40.4	65.9	74.5	55.1	38.9	39.3	36	279	142.7	176.2	132.8	99	132.3	79.1	72.3	136.4	98.4	98.7	84.1	65.1	74.5	115.2	170.9	143.1	94.6	54	83.7	113.9	93	92.2	83.1	78.1	74.2	219.1	191.5	138.1
A0A287S128	180.6	48.3	191.9	99.7	31.6	208	118.7	75.3	65.7	47.1	75	41.3	50.6	76.6	17.7	73.3	25.9	114	37.5	108.9	251.1	63.8	29.4	419.2	95.7	287.3	176.5	60.9	198.5	96.8	254.5	165.9	40.2	56.5	107.9	133.9	141.2	58.7	128.8	150.4	105.4	94	25.5	358.2	58.2	194.4	429.3	208.3	81.3
M0W5R5	95.3	109.2	207.5			461.5	152.7														102.7	71.3	138.3	546.6	510	334.7	257	288.4	217.8	179.8	147.7				95.2	87.5	94.6				68.7	66.5	75.3	350.9	257.4	124.1	519.9	125.4	132.5
F2E4C2	91.5	85.2	78.3	84.1	89.5	68.6	75.1	56.8	56.3	66.4	73	53.9	54.2	64.7	40.7	33.9	32.4	53.1	63.7	39	139.1	122.1	140.5	84	86.3	88.9	37.5	38.3				37.8	51.3	52.1	139	103.7	126.1	26.9	22	27.3	80.7	64.6	75	12.8	19.6	22.3	36	27.8	39.7
F2CRH2	143.5	94.9	146.6	92	50.8	123.5	76.8	65	98.5	54.1	83.7	52	88	90.3	54.4	88.3	41.1	95.6	45.3	79.1	268.3	90.3	58.7	158.2	64.2	153.6	65.3	69.6	118.5	77.4	146.1	151	48.9	71.4	124.2	149	158.3	66.6	140	146.8	115	96.5	39.5	143.1	49.8	88.9	248.9	167.2	84.4
M0XC72	464	214.5	68.7			209.3	189.9					99.2	82.1	99.6				167.3	196.9	161.4							54	46	93.4	53.5	79.5	174	134.1	69.8				52.8	65.9	103.6	336	140.7	185.4	98.8	88.9	93.2	52.9	72.1	111.4
F2CTY1	202.3	112	259.7	110.2	82.3	97.5	114.8	52.3	51.9	30.7	25.3	14.3	74.6	78.8	71.8	103.9	90	178.3	93.4	166.3	362.1	44	281.4	533.7	146.7	210.7	156.8	147.4	181.6	45.7	133	130.9	13.2	60.9	144.3	162.6	91.1	43.9	136.2	139.1	117.9	98.5	121.7	151.9	18.2	135.3	340.2	106.5	42.5
A0A287WM51	259	114.4	346.8	119.1	64	100.2	73.2	81.7	51.8	33	63.2	20	75.8	99.5	13.8	70.5	24.4	166.5	34.6	205.1	410.1	43.1	40.5	369.8	76.6	192.1	198.2	73.6	195	105.9	108.4	105.4	29.6	13.4	116.3	142.6	107.5	26.5	163.5	166.4	142.3	128.3	32.1	175.7	28.3	188.9	275.3	131.7	63.1
A0A287LYZ7	148.8	74.6	208.9	96.5	48.8	132.5	103.6	66.3	53.4	36.5	45.4	29.5	73.5	99.6	14.8	96.5	16.9	133.5	63.2	130	314.9	74.2	53.4	281	49.4	200.9	132.5	63.1	150.6	74.1	149.6	173.3	33.9	41.1	117.9	135.2	134.3	31.2	121.7	138.7	123.5	109.2	44.7	213.9	28.3	139.5	251.7	194.6	53.6
A0A287L8S5	85.7	116.9	57.3	101.1	108.2	64	137.6	66.6	161.6	196	181.5	113.6	116.2	101.7	141	114.8	147.5	73.8	105.5	97.5	77.8	96.2	134.5	37.4	100.9	54.7	78	89.2	88.3	61.9	73.8	57.3	126.4	75.9	134.4	102.5	136.2	91.3	131.8	97	65.1	159.5	193.4	86.8	172.7	87.5	95.5	75.5	205.3
F2E5U7	70.8	65	102.5	78.9	75.9	100.7	99.8	16.8	27.1	49.9	49.9	56.3	62.5	76.2	64	73.8	48.8	102.1	91.3	96.5	292.9	150.9	228.6	213.3	99.7	182.4	69.4	82.5	143	112.5	111.9	56	50.1	50.3	85.8	102.8	85	117	87.7	104.6	84	57.8	60.8	132.2	101.2	129.7	223.6	139.5	126.1
A0A287GYR4	117.3	169.3	119.1	174.4	162.9	97.6	141.9	189.9	177.2	188.4	244.1	180.7	208.3	136.5	176.3	104.6	170.6	113.1	171	121.9	83.2	165.4	180.9	45.4	118.9	70.2	118.8	147.2	77.7	145.2	132.3	129.5	192.1	145	138.8	101.1	134.1	110.2	150.3	78.3	66.3	123.7	140.7	69.6	64.5	98.4	91.3	78.6	165.6
F2DBE3	54.9	64.4	28.2	22.6	19.3	24.8	23.2	22.6	19.4	63	72.7	72.9	76.5	76.7	75.7	67	71.7	26.3	26	24.2	181.7	161	175.3	179.4	182.1	181	36.2	40.2	26.5	34	31	9.4	8.1	8.9	27.4	55.8	37.6	10	6.9	6.8	89.4	233.5	176.8	53	42.6	49.6	28.7	30.8	37.3
M0WP44	38.6	211.3	53.3	65.3	289.2	53.7	235.1	68.8	68.1	184.9	122.6	50.2	73.5	136.1	233.2	212.9	203.9	185.3	93.5	46.6	89.3	58.5	186.2	83.7	160.6	59.9	52.7	165.2	213.7	67.1	60.5	40.5	38.8	69.5	131.6	85.5	33.6	44	40.6	36.5	45.8	45.6	248	47.3	64.3	43.7	53.3	47.8	54.9
F2D884	106.6	120.9	139	78.1	91.4	46	53.7	77.1	71			47.6	48.9	50.3	51	81	86.5	69.3	50.5	63.5	529.5	584.4	362.8	142.3	139.2	137.5			166.4	146.6	148.7	92.7	70.4	56.9	123	108.6	117.7	101.3	99.3	115.6	66.7	78.9	54.7	158	126.8	160.2	367.1	146.9	186.4
A0A166ZI85	324.2	270.6	271.1	286.8	326.7							362	325.2	166.7							163.4	304.5	405									280	285.6	274.4	201.6	162.7	167.9	306.2	222.6	206.9	179.7	188.9	138.6				248.4	215.3	147
A0A287SGQ2	158.1	68.4	187.2	82.5	45.3	155	104.8	45.2	36.9	22.7	43.2	31	51.5	44.3	49.2	65.8	47.8	88	38.2	65.8	283.1	85.5	85.6	253	65.1	151.2	104.2	51.1	129.5	62	130.7	148.1	58.9	73.1	70.2	66.5	88.2	130	88.9	137.7	123.5	87	101.7	208.2	79.9	122	322.3	212.7	97.3
A0A287FFF9	110.5	729.3	150.9	66.8	45.1					101.6	103.3	78.9	56.4	74.4	88.9	55.7	65	108.6	71.4	97	190	150.3	237.5	248.8	214	178.5			103.9	105.9	119.5				84.8	197.8	136.3				47.2	64.8	50.3	97.7	120.1	77.2	139.6	137.1	133.6
P13194	124.5	131	80.5	24.7	57.5	54.4	68.5	93.1	105	131.8	72.5	63.9	34.4	52.8	46.9	30.8	54.1	184.2	277.2	43.3	49.6	33.1	27.1	44.7	101.5	37.8	78.6	91.4	62.6	162.1	190.4	85.5	154.8	207.5	34	109	29.4	200.2	137.6	116.1	22.4	114.2	79.5	68.7	51.6	56.6	130.6	124.1	136.1
A0A287WX12	98.5	64.7	86.1	64.8	45	86.7	79.6	38.5	30.5	23.2	24.4	39	58.8	48.7	34.4	50.8	46.2	67.8	52	71.1	223.8	96.3	128.8	112.7	67.4	120	38.6	26.8	89.7	52.2	78.1	122.2	72.4	77.8	83.9	134	114.6	98.8	61.4	122.2	115.1	82.2	110.3	133	77.6	111.9	150.5	137.7	65
A0A287SV31	106.1	95.6	124.1	131.5	74.8	108.7	102.7	44.6	36.6	36.7	42.4	38.1	56.6	59.9	35	54.2	27	65.6	95.3	50.2	214.7	146.6	98.8	111.2	72.7	100.8	43.7	45.9	109.2	117.4	190	233.4	147.5	111.4	150.7	159.9	147.9	64	71.8	106.6	140.2	107.1	73.2	100.5	55.2	81.1	205	151.7	133.3
A0A287I3X4	78.5	116	101.8	70.3	98.5	100.1	88.8	140.1	184	83.1	138.9	110.1	134.1	137.2	98	75.4	72.1	105.8	87.6	130	111	99.5	135.4	69.6	183.9	127.5	134.5	184.5	99.1	160.5	59.1	72.1	95.4	87.5	67.8	88.1	63	144.3	84.6	63.4	93	55.9	106.7	61.5	86.1	65.3	46.7	86	66.9
A0A287LZV7	128.7	80.9	155.4	91.2	63.3	117.4	92.5	44.4	47	48.5	52.1	54.6	49.5	67	78.9	98.9	68.1	88.7	40.8	65.2	316.4	92	105.7	204.1	113.3	189.2	105.3	82.8	188.6	107.8	159.4	142.6	106.8	83	104.1	110.1	97.1	92.6	80.7	112.2	117.3	92.7	87.4	176.5	149.6	138.2	261.6	136.6	114.8
A0A287IXV3	131.9	80.3	137.4	115.2	82.7	97.5	191.3	41.2	44.9	38.6	48.2	57.3	46.8	47.8	63.8	61.4	54.7	83.6	65.5	69.3	331.4	138.3	217.5	185.1	162.1	197.9	38.3	42.1	143.5	134.7	153	133.7	98.7	61.2	121.4	115.8	119.5	112.6	102.7	118.1	110.5	80.8	104.9	181	137.1	120.5	282.6	158.8	151.6
Q43478	76.3	77.5	53.4	77.8	105.1	101.9	86.3	47.6	67.6	130.2	159.4	59.6	48.2	57.4	110.9	117.7	110.1	82.2	89.8	79.8	139.1	148	170.5	91.3	115	101	83.7	83.4	168.5	73.3	94.2	87.4	102.6	95.8	92.4	52.4	62.1	81.4	76.7	139.1	127.4	140	115.7	105	144.4	128.7	86.6	67.6	137.1
A0A287NBZ8	127.9	73.4	254.6	140.7	65.3	206.8	145.6	61.7	65.9	56.7	77.2	36.1	67.4	96.7	30.3	96.1	33.5	114.1	58.1	166.9	261.1	101.6	47.5	429.5	107.1	223.4	191.4	68.4	218.8	59	184	130.1	37.9	57.7	100.7	163.7	168.5	31.2	103	163.2	111.1	93	53.8	193.6	41.2	174.5	297.5	221.9	61.8
F2CU34	108.4	82.5	136.1	95.2	75.6	64.8	83.2	57.7	54.2	44.6	50.3	59.9	54.3	58.7	63.7	60	56.7	120.9	85.1	97.4	224.7	103.4	127.1	101.2	99.2	94.4	69.2	47.6	82.9	67.9	85.6	105.8	74	54.1	97.1	129.4	102.6	79	83.2	102.8	92.1	69.3	78	94.4	77.6	88.6	134.7	99.3	91.9
M0WUN8	56.4	106.4	95.9	135.3	153	112.7	120	133.1	109.2	110.5	161.6	153	162	127.6	125.2	113.1	121.8	105.7	69.6	175.4	139.3	189.9	324.5	126.2	157.2	141	161.3	134.1	155.7	142.8	66	72.8	118.8	112.2	101.5	81.1	106.8	108.5	64.4	101.2	171.8	66.4	136.6	81.2	135.5	83.6	57.2	70.7	75.8
F2CUG7	123.5	104.7	141	71.7	46.1	91.9	130	66.2	92.1	56.1	52.6	58.6	55.9	84	33.5	53.5	32.5	129.3	111.7	101	136.5	52.6	47.1	157.8	58.3	80.6	112.1	82	124.7	59.3	166	148.7	72.3	36.6	114.5	117	107.8	70.3	143.8	99.7	63.8	137.7	105.6	266.1	76.8	188.4	207.8	105.4	162.5
A0A287UID7	21.5	160.4	252.4	63.3	122.5	42.9	33.2	18.8	68.6	72.4	58.3	104.9	82.4	200.8	59.6	118.3	35.7	264	27.8	60.4	539.9	61.5	49.8	273.4	111.8	112.5	31.5	123.4	370.5	186.7	32.3	32.5	34.2	42.3	234.5	283.4	97.4	17.7	22.4	66.9	64.7	24	47.2	66.7	52.7	64.9	56.3	47.2	15.2
F2DJM5	128.8	148.8	132.6	102.2	115.3	77.7	51.4	112.7	88.3	89.7	77.6	135.1	84.6	69.9	72.7	63.5	58.6	89.6	137.6	124.3	54.4	109.9	133.8	53.3	56.9	56	114.7	90.7	80.6	137.1	76.7	104.1	127.1	157.9	75.6	110.6	96.2	171.9	99.9	114.1	102.6	88.4	81.2	65.6	96.2	79.1	41.1	95.7	67
A0A287NN35	358.5	46.3	76	36.4	37.9	223.1	200.8	128.3	152.7	48.2	221.5				87.9	91.9	73.9				534.9	296	104.7	210.8	122	124	36.9	35.2	247.5	180.6	90.2				172.6	388.7	21.5	88.8	184.6	44.1				115.4	77.6	71	170.2	105.3	147.4
A0A287NC59	123.7	189	158.9	105	132.7	103.2	121	129.6	143.2	73.7	79.5	136.6	149.3	139.7	85	108.6	79.4	111.2	90.8	141.9	144.5	111.6	102.8	99.6	98.5	114.5	103.6	117.9	109.1	100.7	83.6	103.1	91.7	88.3	89	90.2	73.6	129.9	114.9	69.1	86.9	60.3	116	104.6	116.6	98.9	143.2	90.9	109.5
F2DIN7	90.5	108.8	76.6	57.8	72.3	98.9	121.6	110.2	148.7	96.2	72.1	79.8	81.7	98.7	96.1	102.1	87.7	92.7	79.9	80.7	66.6	73	78.4	77.4	82.9	74.2	98.1	116.5	110.4	102.9	60.3	69.9	87.7	95.2	102.5	100.4	82.8	109.9	82.8	79.3	59	67.7	96.9	71.1	122	81.4	56.3	74.1	88.2
F2CWL9	103.6	119.5	148.4	58.3	52	119.2	109.2	146.5	64						72.5	95.2	121.2				56.9	60.8	48.6				252.7	94.3	68	60.1	85.5	97.5	82.4	89.8	69	70.5	67.1	101.5	80.1	106.4							727.7	231.3	192.9
F2E3N1	104.5	91.3	97.5	69.3	75.1	79	91.2	40.6	33.5	29.5	43	53.5	65.6	55.8	72.2	62.3	80.5	96.8	106.6	75.3	338.9	193.7	250.9	85.1	104	81	46.1	42.1	105.8	137	104.8	217.7	175.6	177.1	104.4	130.6	88.8	88.1	93.2	97.4	94.9	108	94.2	137.8	121.8	116.8	171	147.9	118.8
A0A287SS50	107.5	102.8	176.2	125.1	106.4	108.6	108.5	77.6	159.6	122.5	88.1	123	88.5	94.3	161	117.4	129.9	76.2	59.9	59.9	329.8	135	197.9	162.9	117.7	237.3	137.4	112.7	108	74.6	79.1	103.6	81.9	73.6	125	186.6	113.1	102.9	80.5	97.9	138	104.4	103.8	109.8	67.2	92.7	244	130.4	77
A0A287N407
A0A287WZM0	72.8	75.3	81.3	79.6	79.2	129.3	122.4	140.3	144.4	97.1	157.1	117.6	149.4	125.1	77.5	93.9	122.4	116	56	119.4	94.7	125.5	174	121.7	172.8	132.9	122.1	90.8	94	140.3	71	63.9	155	129.1	96.6	117	78.5	123.5	61.7	95.1	138.4	87.7	84	67.2	157.5	53.6	69.1	145	85.6
F2E8Y8	86.9	85.2	61.1	54.9	53.2	60.8	62.7	40.1	43.2	54.4	42.3	74.2	64.3	52.7	60.9	63.9	61.6	66.3	85.4	79.3	33	73.7	83.7	22.4	22.2	22.8	60.5	61.5	39.3	82.2	55.4	58.9	72.9	104.3	29.3	48.5	41.9	142.2	102.1	100.7	88.2	130.9	121.5	53.5	56.3	32.7	60.5	57.9	73.9
F2DNM8	99.2	140.2	91.6	138.4	134.1	93.7	129.4	108.6	117.1	129.7	112.2	132.5	87.5	123.3	108.6	140.9	90.8	115	128.1	107.3	110.2	132.8	137	79.9	85	115.1	87.4	103.8	131.5	122.4	92.7	87	109.3	99.9	128.7	120	153.6	87.4	66.1	102.9	126.1	126	129	79.7	109.5	87.5	76.9	50	114.2
A0A287HLL3	105.1	102.7	110.9	94.8	108.9	113.1	79.1	152.6	108.6	120.6	128.8	172.8	134.5	115.3	101.8	127.4	116.6	112	165.3	140.6	87.5	127.5	136.4	101.6	147.3	102.8	146.6	123.9	116.8	176.9	115.5	116	169.1	122.9	114.5	88	94.5	133.3	106.1	103	104	98.3	110.3	117.3	119.8	116.8	101.1	98.6	129.7
A0A287K7P8	111.4	91.3	155.1	70.1	44.3	87.1	74.5	25.9	21	22.2	23.1	56.7	54.4	58.6	34.8	44.7	29.8	59.2	40.2	52.8	219.2	65.8	75.9	137.5	59.8	114.4	45.8	32.6	100.2	59.7	96	132	110.2	75.4	61.4	94.9	77.2	77.6	84.4	91.2	115.3	72.6	67.4	155.6	61.8	108.3	181.3	119.8	94.9
F2EHF8	112.7	69.4	143.6	125.1	77.1	120	119.1	63.2	59.2	40.3	63.9	60.8	80.3	88.3	42.4	100.3	39	89.5	52.1	65.5	377.3	142.6	102.8	206.8	100.8	183.2	85.3	59.6	149.1	84.8	149	144.7	66.4	80.4	95.5	115	109.5	107.4	80.7	124.4	120.6	83.2	77.3	156.8	102.8	132.7	307.2	158.2	126.8
F2E2G1	82	112.7	88.7	84.8	123.1	101.8	124.7	110.4	89.1	114.4	111	110.6	89	73.6	81.2	103.7	94.1	130.7	110	106.3	91.8	113.1	108.8	76.8	127.3	94.1	104.1	97.5	79.4	147	95.7	105.3	113.3	210.3	73.4	74.9	77.9	101.6	70.8	89.7	110.2	93.6	103.1	85.4	139	93	89.8	96.7	84
A0A287WL01	79.8	88.2	53.9	95	74.5	28.4	42.2	83.6	58.3	61	52	118.7	68.8	61.5	76.4	98.8	83.1	75	125.4	77.4	46.1	89	83.7	38.5	38.7	47	81.5	81.2	37.5	80.3	52.9	96.4	84.2	121.8	58.5	49.9	63.9	97.6	99.5	79.5	104.2	107	85.9	47.6	49.6	61.6	87.8	60.1	122.2
A0A287I4H5	114.1	92.7	87.2	93.7	102.4	84.3	93.5	90.3	85.8	106.9	97.3	110.3	87.2	102.8	106.1	144.1	108.7	110.7	119.5	97.5	118.3	109.9	96.5	128.2	102.9	105.1	85.2	102.4	110	89.3	94.4	105.7	129.5	107.7	105.7	79.6	75.7	98.1	102.6	94.2	95.1	112.1	108.1	89.8	107.6	110.7	86.8	80.8	116.4
F2CX56	127.2	86.6	86.6	161.5	85.1	132.5	135.4	194.7	151.9	116.2	190.2	121.9	120.9	89.2	90.1	64.7	108.7	60.9	115.7	73.5	77.1	144.3	109.5	73	92	78.1	93.8	81.3	66.6	153.2	117.9	141.6	165.8	159.3	96.2	66	154.8	60.2	130.5	100.6	111.1	195.7	90.4	102.5	91	103.2	145.4	143.4	116.6
A0A287VPX4	91	111.1	100.3	63.3	85.6	79.6	76.4	104.4	85.9	92.4	123.3	181.8	97.8	107	82.3	102.8	80.5	80.9	103.7	148.2	56.6	78.1	100.9	82.8	91	79.3	149.7	130.5	111.4	156.7	102.3	123.9	205.8	168.1	78.4	73.6	77.8	162.4	136.1	104.6	69.3	58.4	49.6	63.4	72.2	82.2	71.5	100.3	136.1
F2DLH9	118.7	105.6	78.9	133.6	120	108.7	150.4	135.5	116.2	160.3	179.9	152.6	135.8	109.2	114.3	97.8	134.1	76.5	125	103.3	79	111.7	118.9	64.3	123.2	66.1	117.1	109.8	91	125.8	102.2	121.3	176.3	109.4	87.2	85.4	71.4	136.8	107.9	123.5	114	134.7	142.8	79.9	132.9	95.5	102.2	91.5	171.3
A0A287HTA9	159.3	156.6	239.2	92.2	56.5	160.8	120.8	50.1	78.9	43.2	39.7	54	80	97.8	68	100.5	59.2	112.2	39.8	145.4	235.3	97.5	77.9	325	80.3	229.1	147.1	113.3	174	60.8	170.8	166	63.8	25.9	111.2	131.6	137.8	74.6	143.5	160.5	102.4	78.2	61.2	262.8	77.9	153.4	268.5	206.9	54
A0A287WP26	79.8	138.7	77.9	87.7	120.1	56.1	69.3	145.4	168.9	108.5	101	106.9	115.3	135.4	121.9	102.8	101.5	102.5	127.8	87	81.9	95.3	113.6	44.4	99.2	58.9	95.5	150.3	86.3	107.9	73.8	85.4	114	106.7	98.5	101	82.3	120	76	68.7	56.3	76.9	118.3	60.8	127.3	66.2	74.9	94.7	91.5
F2CTG9	118.5	104	71.9	60.1	100.5	115.7	128.4	146.9	132.2	133	95.4	136.1	109.5	133.4	102.6	104.6	84.6	145.7	108.6	91.5	93.4	73.2	108.8	74.4	118.5	92.3	122.4	165.4	147.1	150.1	132.5	54.3	69.7	71.8	97.3	70.4	41.7	85	86.8	76.3	146.3	134.3	145.7	87.8	108.1	87	60.7	78.4	75.5
F2CQR0	113	100.9	147.9	78.4	65.8	76.6	125.6	38.8	52.1	21	19.5	49.6	58.1	67.3	52.4	60.8	48.4	70.5	65.1	63	235	106.3	163	178.8	106.9	129.5	69.2	74.5	96.2	78.5	90	100.6	92.6	103.2	83.1	128.2	102.2	76.3	61	88.5	102	74.3	79.3	107.2	108.7	103.8	233.1	174.7	152.4
F2DD22	82.5	78.4	61.5	75.6	65.2	95.9	102.4	103.7	82.5	92.2	91.4	106	105.5	99.5	93.4	104.4	106.7	85.3	128.1	102.8	52.8	108.6	104.7	46.5	96.1	64.6	97.9	78.5	78	121.5	75.6	85.4	135.2	123.5	95.1	92.6	120.4	95.3	78.3	93.5	82.3	107.3	87.1	74.4	146.7	98.2	57.8	91.8	94
F2D3T2	64.2	85.2	138.9	112.9	69.6	90	57.3	114.1	73.6	69.3	64.3	188	86.7	85.5	135.9	67.8	57.4	86.1	75.3	111.1	57.6	137	126	71.6	67.7	97	158.8	78.3	60.1	91.6	56.1	49.7	123.4	108.5	66.4	94	95.8	162.9	66.9	115.3	89.7	71.3	67.7	99.6	162	73	54.5	111	65.9
A0A287E536	94	134.3	104.7	70.2	97.1	62.3	69.3	111.7	148	126.1	74.2	74.6	101.1	67.9	70	66.8	75.4	79.2	81.5	86.2	103.9	79.4	96.1	79.3	94.6	71.1	69.7	97.3	73.1	81.5	68.4	90.9	89	67.7	104.8	93.9	84.9	110.8	109.6	78.8	91.9	146.2	128.3	74.6	67.2	96.2	82.4	86.9	128.8
F2CZC9	77.9	140.7	121.5	78.4	91.3	105.1	94.8	109.6	67.3	64.5	58.4	142.8	107.1	116	123.2	85.7	89.5	80.4	86.6	117.1	90.2	92.6	146.2	89.2	84.6	75.2	127.5	104.9	109.2	122.6	65.2	98.7	143	200	68.1	122.9	107.4	135	64.9	123.9	122.1	63.1	60.8	87.2	106.7	98.1	53.1	102.7	74.3
M0Y9X7	155.5	58.2	201.9	68.1	71.8	132.7	56	26.6	32.1	30.1	39	49.3	53.4	38.6	39.3	55.7	42.6	54.9	66.5	93.7	230	151.2	94.3	164.3	187.2	179.3	92.1	26.6	117.8	65.8	122.9	136.9	71	26.7	57.4	129.1	127	105.9	91.4	154.3	152.8	81.6	106	145.7	117.9	125.2	238.7	185.6	120.1
F2CQR8	181.5	81.9	187.2	94.6	57	156.3	115.7	68.4	72.1	70.1	81.8	38.8	69.7	92.5	29.8	90.7	34.5	108	50	150.2	237.2	58.4	50.2	334.3	81.9	203.8	169.8	97	176.7	90.9	165.5	147.2	38.5	61.1	120.1	195.3	156.8	39.4	117.5	136	104.7	97.3	44.3	252.6	58.6	151.4	290.2	179.9	69.6
A0A287NMB4	314.5	255.6	396.2	40.6	37.9	29.1	31.1	11.6	14.3	26.9	27.3	140	136.8	149.3	77.1	77.6	74.5	24.4	22.2	21.7	50.9	46.7	62.6	53.2	53.3	52.7	42.4	39.2	36.9	36.1	44	116.6	108.7	127.5	127	134.6	134.2	118.2	134.3	155.5	81.8	72.6	75.4	27.7	21.4	21.9	180.3	151.2	115.7
A0A287R8Y9	72.6	73.5	56.9	75	83.3	56.6	53.5	102.8	85.8	60.7	56.5	112.5	77.5	77.6	72.4	67.5	71.1	88.1	143	76.4	88.4	114.6	94.5	39.8	57.6	37.8	81.9	78.8	58.3	68.5	78	87.4	102.8	101.6	54.6	72.6	59.9	101.9	82.9	80.7	104.6	128	127.1	80.3	84.9	94.7	74.1	57.4	91.8
F2CZH0	87.7	135.4	57.6	86.6	147.3	30.2	72.9	76.6	168.1	136.4	126	157.8	93.9	94.2	66.3	53.1	60.5	73.5	125	109.9	72	108	138.9	64	98.5	63.9	117.9	95.5	71.3	52.6	87.5	73.8	132	109.6	88.8	87.6	105.6	99.2	86.5	109.8	90.2	140.2	191.9	116.9	137	129.4	78.6	101.6	195.7
Q9M4D6	23.5	16.8	29.3	191.7	59.8	63.5	61	28.4	26.7	167.5	165.6	62.8	67.1	57.8	27.4	20	36.6	34	40.5	42.7	126.2	164.6	119.7	39.7	20.9	20.1	51.5	28.7	225.2	337.1	257.1	66.3	107.1	52.1	58.1	43.3	42	31.7	36.3	19.6	120.2	216.9	143	35.8	63.4	26.8	28.2	24.2	15.9
M0UZA5	51.2	41.9	36.8	55.9	49	27.3	22	27	32	28.3	27.7	63.3	59.2	50.2	59.2	41.9	49.8	48.4	86.7	55	63.8	90.6	64.2	46.8	34.7	24	45.4	34.4	69.5	78.3	35.3	62.3	87.7	52.2	29.6	37.2	25.8	69.3	47.7	51.3	54.4	77	74.1	35.8	28.7	52.2	36.4	38.1	43.8
A0A287TVH7	185.7	87.2	213.4	91.1	39.1	171.2	130.8	58.6	54.5	31.9	64.1	28.5	70.6	90.2	29.9	77.6	24.3	115.3	48.7	166.3	251.9	96.6	92.8	378.7	122.5	234.1	184.8	75.8	201.1	91.3	184.6	176.7	43.6	59.7	113.1	151.9	176.1	118.7	123.1	137.3	114.3	94.2	49.4	248.3	63.9	179	270.2	194.8	58.2
F2E325	88.6	126.4	86.2	70	76.4	60.6	77.9	78.7	67.4	45.6	42	113.3	98.2	98.8	58.4	63.6	64.7	98.6	101.2	101.5	58.3	89	108	45.1	64.3	51.9	74.8	91.1	63.3	64.3	44	79.5	99.1	80.9	58.9	58.4	80	116.9	73.1	118.9	82	62.7	95.1	52	110.3	49.3	32.9	36.1	62.9
B5TWC8				47.2	46	15.8	21.3	27.2	30												32.7	17.6	26.5																		26.1	25.4	24.9
A0A287MBL6	93.5	86.1	72	80.7	84.5	87.4	75.7	126.9	77.5	91.9	77.8	106.6	77.4	71.4	112.6	69.7	61.9	62.3	105.1	94.9	69.9	95.3	137.8	69.5	62.4	74.8	92.1	93.8	82.7	152.6	96.4	97.4	109.5	93.7	62.2	66.5	81	140.8	85.5	93.5	113.1	117.2	83.4	74.1	121.9	70.7	66.2	82.1	94.8
F2CXT7																					391	411.9	399.5	186	134.2	102.6			154.4	205.7	196.8				295	211.7	248.6										249.5	213.9	195
A1YV32	30.1	86.3	128.1	86.3	79.2	124.2	85.7	58.3	48.5	39.4	57.5	55.2	60.1	66.3	91.5	61.1	39	51.3	49.7	97.8	103.6	92.4	164.7	148.2	73.4	119.1	145.2	94.9	107	141.1	55.3	40.2	37.2	83.5	66.2	55.5	73.7	69.9	412.9	42.4	82.5	92.1	48.7	94.7	125.4	89.2	112.5	104.5	113.2
A0A287JG58	165.6	127.9	178.5	54.8	45.9	115.1	149.4	23.9	32.6	64.3	61.5	88.7	66	133.1	133.7	107.7	116.4	93.9	70.1	84.8	191.3	103.9	137.8	217.8	159.3	183.2	36.5	78.4	127.6	84.2	84.9	102.1	79.4	53.7	78.3	80.6	76.1	83.1	63.2	88.2	75.8	76.3	102.7	257.9	105.7	149.9	215.2	150.5	130.7
F2DIE9	123.3	67.8	75.6	116.7	26.1	137.2	131.3	131.3	192.8	74.3	83.4	90.6	90	60.6	65.7	83.5	73.2	14.3	34.1	26.2	81	88.3	111.1	46.6	46.2	73.8	89	69	76.7	126.7	109.3	68.3	135.3	109.4	194.5	201.5	259.1	39.9	46	106.1	62.3	62.4	44.5	162.4	213.2	200.9	307.6	175.6	163.6
A0A287EF15	82.8	118.5	107.1	128.5	146.5	83.5	101.9	244.3	116.6	115.8	138.8	131.4	131.9	85.8	127.1	81.9	122.2	93	97.4	119.6	91.3	178.1	134.2	79.9	127.4	76.2	134.6	104.3	99.7	190.7	116.2	85.8	112.4	108.1	89.2	90.4	125.3	75.1	82.8	84.8	104.2	94.5	119.1	101.9	71.5	110.3	76.5	89.4	91.5
F2DBI8	84.9	82.2	95.2	104.9	101.5	108.2	96.3	93.3	72.8	64.8	69.9	102.4	118.1	93.9	71.1	70.3	66.3	99.6	117.7	109.3	120.5	103.3	55.8	99.7	87.5	77.9	94.1	99.1	187.8	135	138.3	204.3	99.2	114.3	87.2	76.5	79.7	66	87.2	130.5	81.7	89.6	73.6	108	80.1	104.8	132	154.7	90.9
A0A287G4N5	42.1	16.8	33.3	60.1	49	16	18.4	14.1	7.8	35.6	19.1	72.6	45.4	28.2	51.5	18.1	22.9	27.5	30.9	35.6	48.2	56.2	65.2	26.4	14.5	21.5	21	22.9	52.3	44.7	44.8	29.8	136.9	76.4	47.8	85.6	26.5	36.8	75.7	75.7	47.2	77.5	47.8	31.8	29.8	40.3	44.6	16.5	82.6
A0A287LIR7	111.7	107.2	120.1	33.5	33.5	5.3	5	7.7	8.8			11.1	10.5	12.1				4.9	5.9	5.8	19.2	11.9	11.9									39.1	40.1	37.8	5.2	3.5	4.6	172.8	128.4	205.9	145.5	218.4	202.6	63.5	52.9	59.4	59.3	25.9	66.3
F2D9C5	71.1	81.8	78.1	89.2	84.3	104.4	97.8	131.2	106.4	100.7	116.8	144.1	107.1	85.4	99.3	89	93.2	105.1	133.1	130.8	65	120.7	173.9	76.7	115.2	81.2	138.9	103.1	92.6	150.4	73.2	77.7	158.8	170.3	68.1	66.6	75.2	135.3	80.8	91.9	110.9	89.8	86.2	88.2	144.8	89.7	81.3	91.6	120.3
A0A287M5E0	126.7	135.6	153.2	121.8	98	116.7	110.7	61.2	70.9	44.1	43.1	45.1	36.3	73.4	60.8	72	65.3	74.6	65.6	82.9	232.8	112	88.1	143.8	74.3	104.9	56.7	56.2	60.9	95.6	107.2	80.9	70.3	52.5	78.1	138.8	83.9	65.4	76.1	105.2	96.4	84.2	87.5	121.5	99.8	103.9	182.2	116.8	89.9
A0A287H9K1	73.7	93.6	100.6	94.3	109.2	118.2	129.6	137	83.8	143.2	133.8	132	107.1	77	76.5	92.2	93.9	81.9	125.3	167.2	89.5	115.2	149.8	116.6	136.9	81.7	138.7	110.1	151.7	157	96.3	88.8	142.6	123.6	92	96	111	130.9	65.4	102.4	105.9	90.1	112.3	94.2	183.9	79.4	75.9	89.5	113.2
F2CSE3	165.1	66	104.5	96.6	53.7	195.8	56	105.8	70.7	68	82	97.7	65.1	62.4	36.8	70.3	57.3	68.1	105.7	92.7	85.5	97.7	41.1	78.1	91	117.7	127.2	69.1	62.7	124.7	281.2	217.9	94	103.3	53.1	39.9	95.8	55.1	180.2	167.3	119.8	151.5	61	312.1	83.1	215.7	284.2	113	166.6
A0A287EXZ5	109.8	130.7	135.6	119.4	113.1	130.2	122	89.8	103.4	93.6	98.7	129.7	110	114.2	127.9	101.4	106.6	111.6	83.7	115.6	202.1	149	121.5	110.6	109.7	116.6	99.5	96.5	130.2	122.1	115.1	119.3	116.4	102.8	126.9	122.5	128	93.7	99.3	104	83.8	69.1	82.5	140.3	109.2	115.2	136.9	131.9	127
A0A287SAK7	126.4	149	152.7	88.9	79.8	92.8	74.5	112.1	103.5	75.9	69.5	106.6	137.6	132.1	107.2	82.1	85.2	88.6	133	106.4	66.9	86.8	114.2	51.4	63.3	55.8	90.3	115.2	104.9	80	68.2	98.7	128.3	91.3	87	111.4	112.3	145	91	103.6	80.4	76.8	98.9	69.7	103.7	67	54.9	84.2	83.7
M0VTW7	93.1	91.2	73.7	122.4	117.2	153.9	135.8	104	97.8	147.9	132	155.6	94.1	90	107.3	98.9	83.8	71.9	116	98.9	70.4	107.3	115.1	90.4	122.8	89.5	114.3	104.6	142	116.5	113.7	100.5	134.2	148.9	75.6	76.7	86.1	86.7	102.1	87.1	103.5	113.3	115.2	112.3	206.1	113.9	87.4	93.4	137.7
A0A287XAJ7	140.8	178.2	166.5	265.9	101.6			151.9	147	105.1	94.2	184.6	152.3	132.5	191	120.2	126.7	77.5	90.8	95	218.4	118.8	175.5	114.3	133.2	114.3	140.2	97				98	118.7	98.5	64.8	187.2	130.2	160.1	191.8	191	125.1	106.4	135	97	102.6	111.4	94.4	131.5	108.4
A0A0K0VKK1	120.5	122.7	91.7	156.2	133.5	118.5	62.8	186.1	84	75.5	82.7	154.7	70.9	48.9	80	51.1	54.9	55.9	112.2	113.4	45.2	145.7	170.9	39.7	40.1	39.9	99.4	94.4	44.8	164.8	134.9	117.7	151.2	170.3	48.7	101.7	96.4	149.1	66.2	149.2	166.7	156.7	124.9	63.3	101.7	70.8	71.9	118.5	85.3
A0A287T8L9	123.4	131.9	99.3	83.3	125.4	108.1	123.9	151	165.2	196.1	183.9	185.1	154.2	151	163.4	146.5	151.7	64.7	104	98.2	92.9	123.4	121.7	112.9	150.2	114.8	110	152.1	113.4	89.4	107.5	144.6	113.1	146.5	127.3	112.4	93.4	94.1	106.2	81.8	157.3	105	97.4	113.9	131	104.8	104.4	114.7	168.1
A0A287UF89	67.9	71.3	61	147.8	92.3	93	78.4	119.3	105.6	90.8	149.4	133.4	88.3	61.7	126.5	101.2	102.7	83.7	82	63.3	76.1	119.5	203.6	63.1	113.3	84.3	102.1	110.3	47.6	93.3	95.4	80.4	146.3	123.6	85.4	77	76	118.8	65.6	108.9	107	87.4	105.8	91.4	144.1	109.4	60.2	67	108.3
A0A287FYT4	120.7	153.8	128.3	154.6	171.7	91	98.6	165.5	110.7	90.6	77.6	155.7	115.7	70	98.7	77.7	79.5	82.8	133.9	118	62.8	163.2	245.2	55.3	73.8	38.8	97.3	108.4	71	165.8	98	96.4	149.2	185.8	68.3	137.4	110.9	176.5	66.8	120.6	142.8	152.8	136.7	63.3	94.8	62.5	52.9	115.3	67
A0A287FDK0	76.2	84.4	62.5	96.1	97.4	73	68.8	88.1	69.8	106.2	106.2	110	84.9	61.9	78.1	75.8	96.4	81.4	116.1	70.5	86.1	107.9	92.9	69.6	102.6	62.2	82.2	69.1	57.3	117.6	91.5	110.7	130.2	148.2	58.7	59.1	66.1	100.4	85.7	101.3	65.2	125.3	118.1	79.2	92.2	95.9	72	66.5	96.4
A0A287UEZ6	114.6	67	111.3	112.5	75.6	97.9	90.1	178.7	147.8	90.9	133.4	67.6	62.1	72.8	114.2	61.2	60.3	51.6	36.1	32.8	288	138.9	108.2	166.9	79.8	166.7	83	100.2	148.1	95.9	166.9	153.9	95.3	184.9	89.9	112.5	129.8	81.5	75.5	76.6	62.4	51	53.7	180.2	160.3	151.2	220.8	181.5	128.1
F2DVB3	110.4	160.6	130.8	161.6	157.7	133.7	113	146.4	144	103.5	141.8	211.8	156.6	139.6	119.9	104	141.8	133.5	131.9	191.1	93.7	219.7	199.9	57.3	117.8	82.3	122.9	140.5	95.2	141.2	91.9	116	188.4	186.9	99	68.5	141.8	87	60.1	118.7	194.1	103	183.4	62.1	113.5	66.3	40.8	72.1	53.5
A0A287HST8	158.8	121.7	129.9			202.4	233								158.2	129.9	152.1	252.7	233.3	261.4	373.2	197.6	432.8	501.4	272.1	101.6			309.7	297.9	401				247.5	222.3	263.7
A0A287XZR9	127	123.9	79.5	94.9	85	49.5	50.3	135.7	108.4	89	64.2	158.3	97.8	62.2	86.8	52.8	76	88.7	127.7	84.3	44.6	75.7	60.8	33.2	62.1	41.8	117.1	96	83.1	101.5	88.5	92.5	114.4	99.6	49.1	77.4	82.9	105.1	118.2	118.6	83.5	143.2	99.3	70.5	69.1	96.7	72.1	66.2	143.8
A0A287R5R0	83.2	54	32	56.9	32.2	54.6	37.9	41	47.3	81.2	66.7	46.7	26.9	23.6	89.8	99.4	82.4	59.5	102.1	28	27.6	62.2	45	10.2	26.9	17.1	24.4	22.7	66.5	47.7	75.6	45.2	92.2	78.8	76.4	83.7	63.4	58.1	50.7	191.3	78.7	97.6	93.6	86	173.5	81.9	45.4	58.2	119.2
A0A287R3Q7	61.9	98.5	143.9	161.7	153.2	148.8	93.2	182.8	80.3	87.1	118.6	257.7	117.6	109.9	57.9	62.5	63.9	81.8	147.6	206.1	97.3	244.6	138.8	57	85.5	76	129.5	96.6	98.2	200.9	156.6	153.7	153.9	193.8	52.8	57.4	103.3	106.1	67	87.3	132.4	108	135	93.8	108	96	58.6	53	85
A0A287M9E0	108.3	297.3	116.1	75.9	116.3	156.9	179.8	119.6	136.4			86.3	130.1	145.9	146.2	189.8	145.3	97.4	105.2	117.4	95.8	100.5	107.7	89.4	58.9	76.6	77.8	126.9	201	166.5	163.6	68.2	53	98	108.5	214.6	95	124	49.4	76.5	54.7	75.9	163.1	91.3	162.3	63.7	31	101	24.6
F2DCE0	142.6	100.4	143.4	78.8	50	92.2	83.3	42.8	32.7	33.1	39.3	58.8	73.1	93.5	57.3	56.6	57.1	85.9	56.6	56.2	242.5	93.7	122.4	140.4	77.1	145.8	82.1	64.9	90.1	85.4	134.5	115.1	84.8	63.8	90.6	148	110.9	94.7	75.3	133.6	112.7	87.6	84.2	152.8	83.5	132.8	201.2	153	107.6
F2D621	171	239.1	130.7	59.9	155	30.9	31.9	188.4	188.1	125.1	56.9	45	122.7	87	65.1	79.1	116.9	141.9	141.7	107	96.2	84.5	22.4	62.6	105.6	43.4	75.9	225.4	53.9	145.4	122.7	79.8	143.1	104.4	57.2	84.4	50.5	150.7	174.9	76.6	48.4	110.9	248.9	50.9	30.4	43	31.1	71.9	57.6
F2D0D9	124.3	81.8	82.8	60.2	61.3	117.1	86.8	133.7	96.6	84.1	90.6	151.1	82	75.4	81.4	81	90	66.8	142.4	95.5	62.5	92.8	66.7	47.6	83.7	61.1	107.2	72.5	97.2	146.5	93.9	126.3	164.2	139.6	70.2	63.5	71.7	96.8	122.8	95.2	60.1	95.7	92.5	125.1	144.4	130.1	104.8	98.2	152.3
A0A287I0Z1	142.2	77.2	74.3	158.6	97.9	43.8	65.1	91.1	94.7	88.5	90.3	79.1	112.4	123.4	81.7	77.9	90.1				55.1	95.2	142.9	59.5	49.6	57.1	70.1	69.4	109.3	99.1	89.2	89.6	198.5	161.2	45	73.3	91.3	75.9	85.6	59.8	202.4	241.7	155.7	74.3	76.5	101.5	126.4	125	153.7
M0WJK0	116.7	145.2	146.1	99.5	108.2	108.7	116.6	21.2	28.3	192.2	123.6	129.6	170.4	180.4	121.1	99	117.2	141.4	146.5	121.7	93.4	88.5	90.8	80.4	96.3	71.7	26.1	32.4	163.2	75.1	118.8	83.5	113.8	52.2	113.8	114.1	62	147.1	127.6	84.3	124.5	122.7	163.9	94.1	105.9	103.5	43.6	25.3	49.2
A0A287TCL5	61.5	153.6	123.9	187.1	205.9	81.2	57.1	213.2	88.3	102.5	120.6	139.7	124.1	85.1	111	43.2	74.1	78.3	66.3	140.5	87.7	226.9	199.9	55.1	91.6	51.3	107.9	105.9	70.2	161.5	65	65.1	98.3	121.2	67.2	102.4	119.3	111.7	58.7	85	161.1	54.5	145.7	46.7	86.3	76.8	57.6	76.3	43.3
Q43485	261.7	106.7	138	37.9	33.3	115.2	78.5	33.1	51.7	32.5	29.4	24.2	25.9	42.4	35.7	35.6	29.5	61.4	57	99.6	131.3	34.5	87.6	136.1	33.2	76.5	105.9	124.4	86.8	75.1	364.9	107.1	48.6	33.8	88.7	142.9	186.1	142.2	121.4	169.6	94.3	161.5	124.8	323.2	111.6	153.1	444.5	204.1	76
A0A287GPS8	109.9	74.7	71	59.9	45.3	107.4	68.1	138.1	77.3	50.9	38	134.3	46.6	60.7	46	57.1	48.1	94.4	146.4	114.1	43.2	63.1	50.5	52.7	65	63.6	177.3	140.8	102.7	127	121.7	96.7	120.1	134.1	49.9	64.2	68.4	89.8	108.1	124.7	132.1	134.8	95.5	102.4	162.4	104.4	88.3	122	148.5
Q3MUP2	125.5	198.6	213.9	112.8	104.6	115.4	103.6	103.4	107.2	66.1	97	139.1	100.2	117.1	143.2	130.7	76.7	133.7	60.8	133.7	252.1	135.3	114.8	123.4	107.3	171.9	118.5	137.3	148.9	122.8	86.1	123.7	50.5	107.5	105.1	149	120.6	84.6	96.7	101.1	96.5	55.6	57.6	134.7	72.8	106.7	133.8	113.2	73.3
F2DK25	78.1	120.4	76.6	95.3	109.9	84.5	94.5	134.7	104.7	135.5	121.4	108.2	108	98	117.9	98.4	94	114.1	129.5	450	52.3	90.2	135.1	54.1	113.3	69.9	102	120.2	83.2	137.1	74.6	63.2	117.7	127	72.8	73	68.5	130.1	93.9	75.5	81.9	78.2	124	68.4	127.5	61.1	59.1	86.8	100.3
A0A287GFE9	168.6	70.3	216.3	81.9	59.2	92.5	61	56.7	62.9	41.7	41.5	34.9	79.7	81.4	28.7	77.6	25	124.7	47.8	91.7	261.4	60.8	34.1	168.4	58.1	155.3	77.3	51.4	87.1	47.8	153.4	149.2	34.5	60	94.8	180.7	118.7	22.6	139.6	135.7	123.2	105.5	23.3	159.6	25.6	118.9	223.5	149.6	55.2
F2CY55	106	68.7	122	36.9	29.1	75.2	73.7	23.1	24.5	24.4	22.6	32.6	28.1	25.7	56	64.9	63.9	66.7	53.8	59	260	193.8	229.5	230.1	158.3	171	42	27.7	100.3	96.3	140	104.6	103.4	67.5	62.9	70.4	62.8	138.1	107.2	128.7	115.3	77.4	82.5	192.8	174.1	179.6	274.4	113.2	174.5
F2D3S4	58.4	49.5	61.9	43	37.6	46.3	59.6	31.5	34.8	20	14.2	72.2	56.2	55.8	37	31.8	18.3	70.9	65.2	55.9	62.1	29.9	24.2	54.4	31.9	53.3	40.7	45.8	42.4	41.3	48	60.4	37.1	44.6	25.1	53	38.5	82.8	71.6	95.4	45	44.1	27.9	103.9	104.9	83.8	84.5	66.7	62
A0A287F852	80	120.2	109.3	112.7	98.2	68.8	64	174.8	140.5	77.8	78	118.3	109.7	103.2	100.8	81.4	88.2	82.1	140.7	81	61.2	98.3	107	39.5	78.7	53.3	79.9	103.7	83.1	125	64.9	88	125.8	142.1	66.1	103.1	101.7	155	96.6	87.4	95.9	94.7	97.8	48.2	88.2	52.4	67.1	94.9	78.5
A0A287WRG8	152.5	89	79.1	51	46.2	96.3	83.2	96.4	84.7	29	29.2	98.4	63.7	65.6	57.4	84.6	48.6	72.7	35.7	61.8	117.6	55.8	31.8	91.4	54.1	127.8	82.6	55.8	100.8	73.2	101	120.7	52	65.5	85.1	64.2	72.9	65.2	167.6	108.7	70.3	78	54	123.5	78.1	98.8	142.9	113.9	82
F2D226	88.1	98.3	183.1	147.8	94.4	105	144.4	58.9	64.2	37.7	51.5	53.3	68.6	98.8	79	131.8	61.9	99.3	52.7	63.4	425.8	113.8	158.9	365.1	95.4	222.3	101.1	96.1	170.2	98.2	146	120.5	54.8	53	106.7	127.2	104.7	92.5	130.2	87.7	94	119.8	93.9	194.3	68.3	139.1	410.3	157.1	98
F2D715	91.2	134.3	87.3	88.5	104.1	45.6	61	95.1	125.7	116.2	78.8	80.6	73.9	67.9	108.7	103.2	94.4	79.4	136.5	90.5	76	81.7	98	77.4	79.6	58.3	86.8	86.2	46.8	71.7	50.9	64.7	80.3	97.2	82.2	81.8	83.4	139.1	113.7	94.1	61	146.2	102.6	78.3	77.7	89.5	115.1	68.8	158.3
A0A287GMW7	62.6	49.1	53.8	20.2	19.5	26.8	24.3	12.6	12.4	31.4	40.6				44.4	36.4	53.3	35.4	39	37.9	73.3	87.6	82.8	90.8	80.6	78.7	69.6	70	62.6	63.9	80	69.4	74.1	56.7	44.7	50.3	50.2	43.4	41.4	37.7	83.2	42.1	84.4	75.4	78.2	64.1	150.4	118.2	121
B1NC18	122.6	88.8	149.6	55	48.7	59.9	68					91.6	84.7	93.7	84	96.6	75.5	88.5	86.4	93.9	378	157.5	255.2	45.4	44.6	41.9	14.3	10.1	17.6	21	21.1	97.8	86.3	83.8	113.9	166.6	91.2	109.9	91	131.4	85.1	97.9	61.4	52.1	52.4	37.3	21.6	24	32.4
A0A287P873
A0A287XIA3	94.6	117.5	66.5	96.1	122.6	160.2	162	139.8	137.4	119.7	113.8	143	146.5	131	99.7	92.3	111.7	114.2	117.8	113.1	121.6	107.2	152.8	61.2	135.2	70.6	118.1	111.1	141.7	102.5	90.6	93.7	111.6	88.6	111.9	77.5	84	87.2	78.1	92.2	92.5	105.5	103.7	108.1	171.1	136.6	84.6	99.6	140.4
A0A287IHR1	1191	119.5	148.2	177.7	183.1			183.6	221.2			148.8	305.3	162.6	110	154.2	138.8	191.8	254.3	230	145.1	121.8	168.9	106.7	107.6	102.1			133.2	166.5	202.2
A0A287EXK4	66.8	60.3	109.2	177.1	101.1	106.4	84.8	140	92.3	63.5	121.2	202.6	90.3	65.6	53.1	47.9	37.3	60.3	92.2	91	62.6	161.4	153.4	76.1	84.6	65.7	129	99.9	40.1	103.3	114.7	110.4	135.5	192.3	48.6	122.9	106.9	91.3	37.9	103.5	153.3	128.2	48.8	48.6	138.2	77.3	84.8	78.6	97.1
A0A287M8C3	174.4	75.9	67.5	64.8	58.6	129.9	55.3	104.3	113.6	85.2	105.9	216.1	83.4	85.2	74.6	84.4	69.1	61.2	118.5	95.3	56.6	65.4	58.3	65.2	83.4	87.1	106.8	119.4	74.9	108.2	120.2	129.8	147	108.5	70.7	75.7	58.4	99	165.6	131.5	94.6	109.8	57.7	129.8	110.5	119.4	75.7	101.5	151.1
A0A287IQB8	80.8	38.9	256.2	126.6	44.5	192.3	156	31	43.4	30.8	60.9	31.1	95.7	86.3	23.5	77.9	20	138.7	45.6	76.3	640	91.8	33.6	242.7	34.8	180.9	42.1	29.8	308.7	22.7	154.3	179.5	23.2	72.7	175.3	115.7	217.4	34.2	57.3	207.2	71.1	90.8	20	232.4	33	63.5	364.6	298	34
P08248				30	40.3			497	69.2	45.1	50.3	200.4	256.8	232.4	32.2	31.5	30.1	88.2	91.2	120.5	119.3	109.9	125.1	19.9	23.4	22.5	180	35	187.6	163.3	274.6	245.3	155	332	44.7	35.5	43.1	29.8	57.4	244.6	126.3	128	46.3	96.3	123.8	145.1	110.8	365.6	141
F2DU28	105.1	184.6	64.5			129.1	198.4	206.9	188.2	241.7	227.1	163.8	181.7	130.8	46.1	37.9	41.1	181.3	68.3	51.4				134.9	190.5	47.6	182.3	181.9	140	84.5	44.7	28.6	89	56.1				247.4	52.9	45.5				36.1	44.4	51.7	69.1	44.9	232.8
F2DD79	146.2	87.3	76.1	113.7	181.5	232.6	85.5	96	82.1	16.3	112.2	32.2	98.3	27.8	28.1	23.5	36.6	21.1	15.8	168.4	287.3	311.8	199.1	160.3	196.9	176.4	165.6	83.6	148.8	161.9	153.8	19.9	20.7	24.7				78.8	71	103.3	282.6	236.6	120	153.6	205	170.1	47.6	65.9	57.4
A0A287PJJ4	113.3	135.9	73	138.2	116.5	57.9	118	131.4	104	93	79.6	112.7	111.6	111	95.6	70.1	75.5	118.1	155.1	92.5	76.1	94.8	97.1	50.2	71.3	51	115	128.8	92.3	85.8	104.5	82.5	98.6	98.2	100.6	130	77.7	157.6	71.5	93	143.2	125.6	151.6	56.2	136.7	75.9	68.6	85.7	88.7
A0A287Y069	142.6	68.2	189.2	132.7	82.8	92.9	66.9	81.5	62.6	25.9	28.8	49.3	68.4	59	46.6	79.6	45.5	98	50	63.8	170.7	104.3	132.5	126.5	46.9	147.9	96.6	55.4	65.4	79.3	126.8	126.4	29.5	73.4	155.7	206.1	202.8	125.6	59.9	195.4	117	72.1	48	158.9	85.1	160.1	291.9	163.3	73.9
F2E6I1	128.6	122.4	125.8	135.4	119.1	201.3	191.8	53.5	60.5	46.2	53.8	92	84	99.6	87.3	96.6	92.6	39.9	44.1	48.6	105.6	63	106.9	191.7	171.6	191.5	28.6	34.1	121.4	103.5	102.6	32.8	32.7	31.3	251.6	386.3	248.9	62.6	60.7	61.7	65.3	64.7	57.1	83.8	70.8	69.3	417.9	297.3	342.9
A0A287KM84	77.9	79.9	103.6	195.2	244.8	78.7	58.6	261.9	65.7	56.2	91	111.7	88.7	51.1	184.9	32.5	56.6	71.2	79	81.8	49.8	160.6	186.7	48.1	101.7	56.9	162.9	85.1	53.4	224.1	120.8	91.8	163.4	192.5	41.4	128.4	104.7	157.3	78.6	108.6	104.6	126.9	106.8	68.4	57	60.2	90.2	105.5	89.4
A0A287WK03	98.2	95.8	121.3	103.5	98	124.6	110.4	104.6	135.5	99.4	117.7	99.2	67.5	85.8	110.6	88.6	91.7	74.2	97.5	65.8	137.6	117.2	120.2	126.1	141.1	135.9	85.5	91.9	128	136.4	142.2	100.1	62.9	92.2	109.3	131.5	128.2	125.3	79.3	87.4	118	85.3	99.1	107.2	103.5	92.4	189	142.7	147.4
A0A287MDJ8	204.9	162.6	149.6	38.2	31.2	103.4	103.8	141.4	86.1	19.8	19.7	162.5	95.8	109.7	10.2	13.7	16.7	47.7	79.6	56.9	50.8	46.2	55.8	13.5	13.3	12.1	92.6	76.6	216.6	158.1	218.7	152.4	116.9	116.9	30.5	33.8	39	112.4	145.2	100.4	60.6	143.7	67.6	102.3	73.8	74.4	117.8	139.9	173.2
A0A287T7V3	167.4	97.8	93.6			54.2	56.9	16.2	17.3			31.2	26.8	35				36	46.1	34.2	163.9	179.8	116.9	87.7	43.4	55.1	30.6	33.6	28.9	75	144	231.6	212.7	142.4	28.5	18.6	60	106.9	131.5	183.8	25.9	82.4	50.6	239.3	50.7	24.2	512.4	64.1	149.1
F2EFS3	75.9	124.7	87.7	164.5	134.5	60.3	148	130.2	105.9	193.3	151.4	74	102.9	108.4	115.4	93.1	97.5	94.3	147.2	111.5	75.6	169.8	180.5	48.8	91.8	41	87.7	101.7	105.5	116.5	68.8	74.5	121.1	121.2	109.8	106.9	140.5	137.4	54.7	79.8	122.3	116.1	174.2	63.7	135.8	83.9	73.9	71.6	102.1
M0Y1I9	91.6	86.3	113.2	82.1	94.3	44.9	59.6	38.8	32.2	6.2	9.7	95.3	66	76.4	68.3	47.6	50.6	45.6	55.7	33.9	79	88.2	109	48.4	62.3	63	35.3	32.4	113.9	89.4	90.4	94.3	84.8	104.3	78.2	105.1	94.8	91.4	60.3	85.8	91.8	88	90.4	43	48.1	58.5	73.1	54.4	50.9
A0A287NZX3	126.7	134.8	80.9	100.5	97.9	76.7	82.9	122.8	119.7	105.3	105.1	146.2	97.3	123.6	119.8	106.2	93.5	124.7	102.9	84.8	62	68.9	68.6	43.1	63.5	76.4	87.8	114.3	62.7	76.5	53.4	54.7	92.8	114.2	89.5	86.8	90.3	114.3	142.2	101.1	88	90.8	108.6	62.3	103.4	70.5	50.8	80.8	106.4
A0A287FAF8	127.5	168.2	76.5	96.3	159.5	98.9	98	137.2	152.1	95.6	92.1	133.6	157.4	125.2	167.1	103.9	141.1	56.6	69.4	44.1	70.7	63.7	86.9	69.8	64.6	48.1	67.6	78.1	37.6	43	39	62.1	104.5	63.5	94.7	87.1	70.4	112.2	82.6	69.4	147.6	176.5	177.6	46.5	47.5	50.9	56.9	51.6	103.7
F2CRM3	115.2	110.6	57.5	92	103.9	84.1	78.6	97.8	129.4	154.2	103.8	119	94	134.8	187.6	142.7	171	72.4	155.2	121.8	102.7	101.7	84.8	67.1	81.9	82.1	65.1	64.2	76.8	68.7	64.2	84.7	103.3	72.7	120.8	78	115.7	112.8	211.8	126.2	136.6	173.6	190.9	69.7	109.7	81.1	100.2	66.9	189.2
F2DPE3	152.2	171.5	146.5									106.9	86.6	86.9	349.5	161.7	239.8	144.2	62.5	151.1	158.8	162.1	139.2	117.3	71.5	108.4			88.8	58.6	74.7	62.5	50.4	70.8	117.2	79.4	160.9	39.3	40.7	34.3	32.6	31.6	28.7	58.5	47.4	48	87.3	60.1	85.7
A0A287FCC2	49.5	87.7	143.1	122.6	110.9	107	155.3	72	89.9	77.4	79.8	22.1	20.8	29.4	36.5	97.6	40.2	171.1	126.4	101.5	401.1	106.6	88.8	270.1	135.9	236.9	116.5	102	168.3	54.9	83.3	71.2	41.7	59.9	119.4	116.5	88.3	119.4	63.9	90.9	110.4	87.7	61.7	122.7	58.9	110	181.4	122.7	99.6
F2EBJ8	150.7	91.7	211.6	92.7	70.4	102.7	86.2	51.6	78.5	52.9	46.7	30.9	71.9	111.2	23.7	122.2	30.1	153.8	52.1	88.8	473.3	60.1	27	297.4	63.2	246.7	65.3	78.7	99.6	68.5	127.6	131.8	23.5	34.1	132.4	141.5	96.3	118.7	142.2	115.1	91.7	95.1	36.1	114.6	77.7	74.1	286.4	122.8	70.3
M0V292	124.4	88.1	46.7	100.5	102	84.6	121.1	102.3	78	103.4	87.2	144.8	77.6	125.8	109	61.3	75.7	125.8	139.4	69.8	56.6	73.1	96.3	58.1	67.5	36.4	87.9	98.4	127.4	77.2	121.9	91.5	147.2	94.9	79.2	80.1	64.3	85.8	82.2	120	98.9	156.2	155.1	105.8	137.1	92.2	76.9	81.8	139.3
A0A287UXA0	122.8	153.4	79.3	160.3	158.8	112	129.3	146.5	144.5	117.9	158.1	158.6	139.4	129.1	162.8	73.9	101.5	66.3	97.3	69.6	85.5	120.5	134.7	53.9	90.5	66.7	86.8	111.6	99.5	121.1	96.9	86.2	130.6	133.6	101.4	79.6	87.7	103.7	111	77.1	79.6	120.3	114.4	82.8	95.8	79.8	84.1	79.4	175.8
F2CS40	59.4	59.3	87.6	21.7	23.3	66.6	54.1	27.8	25.5	54.4	56.9	42.1	19.2	28.6				54.3	38.2	47.9	266.9	269.6	136.1	112.4	70.8	112.1	105.3	106.5	95.6	69.4	41.9	56.9	46.4	45.6	57.1	59.6	50.6	64.8	66.5	67.4	26.2	19.4	13	91.5	82	77.7	90.3	61	77.8
F2E1V9	92.4	120.4	107	173.3	135.4	144.1	78.8	170.2	122.9	120.6	169.6	170.2	166.1	104.2	76.5	124.5	93.2	95.4	99.4	123.8	130.9	180.1	134.4	86.1	117.7	94.1	145.9	103.4	98.9	177.3	96	98.3	123.3	146.3	88.8	116.1	131.5	102.6	95.5	114.3	108.2	96.3	95	111.9	128.5	126.4	115.5	117.9	112.7
A0A287MPZ0	113.1	101.8	69.6	143.6	106.3	88.3	136	107.8	107.1	152	153.4	91.3	105.1	108.2	97.9	109.7	111.4	72.5	95.7	69.2	71.2	109.5	104.7	85	101.2	79.3	105.2	85.8	76.4	107	100.1	85.3	123.9	109.1	106.8	110.8	107.9	89.2	102	86.5	83.4	153.3	94.9	113.9	124.4	93.3	125.3	96.9	173.6
F2DDF2	63.9	104.1	107.9	118.5	105.4	135.7	116.1	113	73.2	76	92.8	167.7	95.7	82.6	121.2	109.4	82.7	78.8	60.4	121.6	86.7	137.9	155.3	76.7	87.2	96.9	117.5	90.3	121.5	91.7	80.4	105.9	113.4	112.2	119.1	108.1	138.3	110.7	66.3	107.6	158.2	68.1	123.7	86.2	155.9	109.8	40.2	56.8	67.7
F2EHD3	172.6	176.1	150.1			118	118.5	101.2	76.8												94.2	81.9	119.8	185.6	155.6	139.7			98.4	100.6	114.4	126	156.5	120.3	110.4	146.1	106.1	109.3	69.4	126.1	158.4	119.3	179	189.8	185.1	104.6	268.6	228.8	187.7
A0A287VJ44	83.4	139	139.7	107.1	108.3	85.6	95.4	112.5	111.6	63.4	80.3	88.1	149	110.3	89.3	80.7	81	124.3	145.8	143.3	83.7	113.9	90.9	47.7	87.2	46.2	97.9	120.6	94.3	112.5	59.6	91.1	125.1	90.7	83.1	145.1	129	95.2	68.7	75	81.4	57.3	112.8	29.2	36.8	70.8	58.7	74.1	66.8
M0UF06	123.2	98.3	86.2	105.1	83.8	105.4	130	127.9	103.1	152.2	150	120.2	133	102.4	89.1	91.8	117.2	93.5	154.9	94.2	75.8	78.7	60.8	73.2	103	101.6	119.3	94.3	120.7	137	140.2	124.1	118.3	82.2	83.3	84	62.6	119.8	120.4	96.9	97.8	186.8	98.5	102.2	133	106.1	131.7	111.3	229.7
F2D4A4	198.3	103.6	115.4	86.8	73.6	96.2	100.8	89.2	124.1	106.8	67.9	166	122.1	126.3	53.7	60	64.9	87.7	167.3	90.4	100.9	65.6	76.6	68.5	73.6	62.6	107.5	110.9	85.8	86.3	200.3	120.9	175.2	95.7	96.2	121.6	107.4	91.5	93.8	119.8	95.4	127.8	139.9	100	130.9	117.5	111.2	87.9	144.8
A0A287IXV9	65.8	35.7	34.4	61.3	31.3	27.4	30.1	118.4	100.8	90.5	89.2	106.5	120.5	106.5	49	46.4	56	119.9	146.7	143.5	46.2	70.8	100.8	41.3	57.7	41.5	32.4	32.1	40.5	58.8	58.9	121.1	142	120.2	50.8	67.9	70.1	94.2	113.7	90.1	106	94.7	49.1	34.4	35.4	47	130.3	170	148
F2CW55	124.9	86	93.5	95.5	80.3	125.5	65.4	150.6	78.2	60.9	54	176.4	101.9	70.2	56.1	63.9	79.7	74.9	138.8	138.9	61.3	111	59.7	43.9	66.3	78.1	137.8	71.2	50	181.9	114.5	132.4	151.2	139.1	59.4	42.6	84.9	104.7	153	118.5	135.4	137.8	58.1	108.1	131.3	116.4	74.3	99.4	107.7
F2D2Q0	167.4	139.5	133.1	24.7	10.2	101.7	79.8	181.4	176	60.8	61	131.7	189.8	89.5	25.8	49.8	58.5	40.1	48.5	41.6	48	14.9	37	204	186.7	289.9	235.2	306.7	123.4	144.1	92.5	62.2	82	98.4	46	32.4	13.9	248.5	254.5	180.3	16.7	31.4	22.8	62.1	36.5	77.7	57.2	70.7	78.3
A0A287E0R3	197.4	207.2	115.5			23.5	24.1					19.1	19.5	14.3				46.6	27.3	25.8	208.7	79.3	294.5	126.5	108.5	91.9	19.1	17	33.3	105.4	141.4	223.2	210.9	233.5	22.7	36.2	41.3	168	112.2	157.5	105.7	81.2	106.5	281.3	355.5	260.3	326.4	56.8	183.9
A0A287PJ55	82.4	140.6	70.1	85.4	157.8	79.6	142.9	86.6	110	143.8	112.7	111.3	91.5	164.1	195.4	101.7	133.3	114.6	79.4	93.7	91	91.4	232.9	119.4	153.3	83.5	110.4	158	180.5	129.2	73.7	59.2	102.2	99.9	102.3	122.9	76.1	138.7	53.2	65.6	124.1	86.8	155.2	57.5	123.2	46	40.8	56.8	67.5
A0A287JHN8	73.7	106	115	63.9	69.4	93.5	106.1	74.4	60.2	80.1	51.7	97.8	53.1	66.8	104	59.9	66.2	71.1	116.2	99.9	81	73.3	73.9	60.3	64.8	70.8	112.6	66.5	99.6	79.9	69	76	76.3	108.3	71.6	80.8	86.6	126.4	66.8	80.1	103.9	84.1	150.3	86.6	145.3	75	87.9	89.7	61.3
A0A287FAD4	108	103.2	58.3	115.5	83.8	50.2	184.3	65.6	134.9	184.8	92.9	101.1	82.2	93.2	142.9	83.6	77.6	75.9	125.3	95.2	102.1	83.4	77.7	92.3	86	69.5	84.3	101.6	71	54.9	118.4	119.1	115.8	79.3	85.5	102.9	68.7	116.9	116	99.7	105.6	163.5	126.2	94.2	106.9	113.2	90.5	66.4	157.7
F2DD09	12.4	308.4	51.1	215.6	374.4	24.6	374.5	27.5	326.5	461.4	498.1	24.5	284.9	337.9	367.5	308.6	327	250.4	41.8	43	144.1	62.9	379.8	167.9	343.7	150	31.6	289	349.2	18.4	15.2	14.7	28.4	21.9	307.3	243.9	59.8	66.8	11.8	25	27.2	18.4	338.9	17.8	35.3	20.2	11.2	18.1	22.9
A0A287K2G9	75.3	116.8	56.7	283.9	57.9	18.3	21.9	154.4	153.8	126.6	121.6	65	121.7	39.7	201.9	40.1	70	26.3	30.2	30.8	20.4	88.8	50	8.9	18.6	8.4	25.6	32.4	23.5	26.8	20.9	30.1	83.4	104.8	47.9	61.2	224.7	27.5	17.7	117.1	101.8	87.1	126.7	21.4	34.8	16.6	17.6	70.9	48.9
F2ECW3	52.6	177	110.1	167.4	207.8	89.6	136.6	182.5	168	148.8	217.1	158.4	200.7	103.3	78.5	93	97.3	120	84.6	120.4	121.6	219.4	185.4	77.5	191	67.8	161	187	120.5	157.9	90	71.4	142.5	103.3	60.8	92.9	95.8	115.9	41.1	85.4	119.7	42.5	192.8	64.7	123.8	60	62.3	76.5	41.6
F2DGG4						14.1	11.2	10.9	11.2	6.4	5.3	10.7	4.6	6.2							37.8	42.6	36.4	11.4	13.6	14.1			4.2	6.9	7.2	6.8	5	7.2	3.1	3.1	3.9	10.6	10.4	9.5	15.3	18.8	17.4	6.3	6.9	4.3	15.2	19.9	34
A0A287E4C0	123.5	132.8	146.1	90.6	96.5	43.6	39.6	10.2	7.5	7.3	6.4	50.3	86.7	68.3	62.9	59.6	57	48.2	54	46.7	274.6	225	232	157.2	124.6	129.8	23.1	21.6	94.3	103.1	101.7	157.8	146.1	141.1	134.3	152.2	105.1	98.1	71.1	110.4	88.5	65.1	77.5	135.7	142.3	127.2	176.4	171.3	177.2
A0A287EI57	100.9	95.5	99.1	105.8	109.2	54.6	53.5	149.9	106.2	70.1	68.2	77.8	87.4	79.6	68.5	72.1	62.3	92.7	76.3	61.9	229	125.8	154.6	171.6	78.9	180.4	102.8	67.8	91.6	113.2	114.8	82	48.6	60.6	66.4	126.7	91.5	55.7	48.3	71.7	86.5	86.1	88	135.1	92.2	98	194.6	124.1	104.3
F2CZ05	78.7	72.8	63.3	55.7	59.7	53.1	53.9	126.2	120.2	84.7	71.4	67	76	61.3	72.2	52.2	88.7	109.8	142.9	82.4	56.9	74.9	54.7	43.1	86.4	53.1	83.4	86.2	84.6	140.4	103.8	96.6	106.2	113.3	55	67.6	50.2	113.7	91.6	123.6	84.5	117.4	114.1	82.9	97.6	81	70.7	91.5	77
F2D849	106	134.7	116.1	91	102	83.8	78.3	154.3	108.6	71.3	99.3	123.9	122.6	96.8	69.1	81.1	89.5	131.3	191	177.3	57.8	106.4	97.9	63.2	82.6	70.2	131.2	97.7	118.1	130.2	91.7	143.1	145.2	98.9	95.1	74.1	102.6	155.7	110.3	153.4	96.2	76.6	70.7	116.7	163.6	125.6	51.6	70.3	83
A0A287EWN1	51.6	38.2	38.9	64.6	62	63.3	47.6	50.9	39.6	39.9	41.4	76.9	66.9	63	53	52.4	52.3	67	116	79	95.3	113.1	104.3	29.4	29.6	31.3	29.8	29.3	40.4	63.4	46.1	46.6	70	66.7	55.6	49.8	60.4	66.7	58.4	74.3	178.6	180.4	70.1	76.8	95.3	84	43.2	50.1	60
A0A287VPG4						761.8	871.1					120.7	141.2	73.8																											693	449.9	588.3	765.5	530.9	451
A0A287RKI6
A0A287WLW1	133	117.1	113.6	55.5	39.1	97.6	83.7	36.4	29.7	22	22.8	66.3	64.1	77.1	52.4	65.7	70.7	68.8	70.1	59.4	214.8	89	157.5	218.5	102.2	125.1	69.4	55.8	131.1	75.1	77	82.5	67.4	74.8	101.1	147.9	97.1	56.1	72.7	66.3	55.7	60	38.3	166.3	157.2	138.9	201.8	116.4	101
A0A287LW87	93.6	82.3	137.8	76.7	73.4	75.5	67.4	79.3	26.9	41.7	44.5	71.4	77	59.1	37.2	35.9	36.9	47.8	40.9	39.8	198.6	184.6	173.9	98.8	72.8	94.6	80.6	69.6	109.5	104.8	104.2	119.5	106	116.8	90.9	106.5	96.5	109.4	96.5	178.5	99	89.9	105.3	82.9	93.3	75.2	117.3	134.5	90.8
F2DIC8	40.4	187.3	74.7	82.1	156.2	87.4	101	61.7	122.6	116.7	80.1	146.4	118.7	122.5	161.1	94.6	129	132	77.5	51.9	97.4	58.5	135.8	34.3	111.6	49	46.4	133.2	76.6	65.8	28.6	26.5	44.1	55.4	93	123.2	52.8	231.8	42.1	56.5	152.8	176.8	187.1	40.4	58.1	27.9	34.2	67.1	60.9
A0A287XK66	190.1	195.9	209.7			37.1	25.6					41.8	34.5	47				60.9	28.1	20.4	193.5	239.7	172.9	96.4	84.2	100.3	59.8	34.4	35	44.8	76.1	171.4	211	176.7	39.5	56.2	75.2	137.1	130.1	148.7	47.2	160.4	106.7	194.9	286.5	217.6	250.2	83.2	15.1
A0A287V6N5	141.2	145.5	121.2	104.8	123.8	91.4	86.9	127.3	100.1	128.4	95.6	166.4	119.2	103.2	90.9	134.7	90	118.1	186.5	154.3	117.4	89.1	75.2	150.1	110.8	126.9	126.7	172.7	67.4	112.7	126.7	113	125.6	124	87.5	114.1	95.5	152.8	140.8	113.5	91.2	114.7	97.8	102.2	103.9	94.7	121.4	94	138.8
A0A287P420	95.7	65.4	45.4	132.2	112.6			27.5	25.9	29.8	24.6	44.6	32.4	37.9	30	16.5	27.9	53.9	50.2	72.5	84.1	99.9	101.3	12	14.5	15.2			43.9	38.9	36.8	38.1	46.4	55	62.7	74.7	76	147.9	115.2	127.5	21.8	31.2	30.6	26.1	48.9	33.8	14.7	12.4	8.9
F2D333	163.3	163.3	174	44.6	12.5	50.7	18.5	224.9	330.5	42	14.3	174.5	230.3	249.1	23.2	19.4	18.9	173.1	253.6	175.4	110	79.1	124.9	31.9	34.4	16	186.4	163.6	34.5	27.3	24.4	129.4	239.5	190.3	15	45.5	27.4	195.6	117.8	166.6				33.3	29.7	37.9	148.7	232.8	329.4
P60161	126.1	81.1	158.7	84.4	59.9	135.3	151	57.9	75	90.7	87.9	67	89.9	132.5	51.2	117	44.1	127	70.4	133.4	356.8	86.4	144.3	274.4	85.7	184.8	142.2	97	265.2	61.5	135.7	114.7	44.4	51.2	173.8	155.5	149.3	69	93	96.5	86	87.7	41.3	187.6	123.2	127.2	238	165.7	77.4
A0A287X798	77.5	131.9	68.5	65.2	105.8	61.2	275.8	95.4	105.8	112.2	74.7	82.2	117.4	77.1	57.6	78.9	104	117.7	120.9	94.8	55.4	77.4	66.6	32.1	36.6	27.8	100.3	137.9	51.2	103.7	72.2	69.8	93.4	104.8	57.3	76.2	80.8	120.3	115	73.5	17.7	23.2	22	73.3	47.8	37	57.4	78.1	74.7
F2EE96	19.6	18.5	18.4	21.7	26.9	7	13.9	37.9	29.9	35.2	32.3	19.3	22.5	31.4	3.8	1.6	4.4	34.6	36.4	27.6	35.2	29.5	52.4	28.9	42.9	24.6	27.8	36.4	40	35.1	36.9	0.6	1	1	30.9	29.9	34.1	19.5	14.1	20.1	7.1	6.5	7.1	3.6	3	1.2	11.4	8.2	10.5
M0W6T7	75.3	141.5	166.5	138.7	147.3	91.6	110.3	88.9	219.2	118.1	156.5	83.1	151.3	94.5	139	133.8	130.5	130	140.6	236.8	123.1	188.4	230	105.6	148.5	79.4	119	130.8	154.5	58.1	57.1	65.5	102.5	121.5	159.2	143.3	142.1	204.9	44.7	85.5	101.3	80.4	181.9	102.2	130.9	164.4	83.2	65.7	86.8
A0A287JDT6	121.7	146.4	125.9	58.3	71	79.1	77.4	42.5	42.8	17.8	19.2	98.5	83	80	74.8	76.4	96.2	62.1	75.8	90.2	232.6	85.5	182.6	194.8	96.6	150.8	55	70.7	132.6	144.2	174.3	104.4	114	80.5	82.1	75.2	76.5	116.6	73.2	89	83.1	71.8	67.6	150.8	130.9	88.3	172.8	115.8	163.4
A0A218LNQ7	107.8	81.2	110	40.4	42.5	271.1	350.8	18.1	16.1	44.5	61.7	85.9	50.4	99.8	39.3	50.3	22.5	166.2	162.7	85	174	51.6	135.9	145.9	60.8	92.4	100.5	81.1	226.8	237.5	153.7	132.4	119.7	73.8	93.3	90.7	70	178.3	126.3	200.9	107.5	59.2	89.9	489.3	100.3	135.5	177	73.6	75.1
A0A287P2M4	114.2	114.7	88	68.4	84.7	124.1	118.1	82	71.4	55.2	56.3	137.1	73.8	99.3	59.3	53.2	35.9	68.1	81.1	115.2	95.3	83.1	166.3	87.2	77.1	60.9	68.2	60.2	75.7	112.4	75.3	69.5	111.6	114.2	70.9	92.2	85	118.6	102.7	82.9	79.5	87.3	85	53.5	90.8	64.5	51.4	56.9	92.1
F2EGV5	76.1	171.6	112.7	75.6	120.6	78.1	75.3	121.9	128.5	117	62.2	100.6	118.9	123.3	85.9	151.1	114.3	105.4	110.1	111.7	92.6	67.2	39.3	120.7	103.6	119	101.6	196.9	93	104.1	68.1	82.5	76.2	120.1	86.9	96.7	65.4	121	205.7	71.6	90.7	115	91.5	71.7	89.8	71.6	108.6	108.2	144.9
F2CPV3	111.6	139.1	71.7	66.6	92.2	32.2	28.2	123.1	110.8	91.8	67.1	86.3	99.4	81.5	66	68.4	63.8	98.7	97.2	68.1	63.8	88.9	71	78.9	58.9	61.3	72	101.5	68.3	127.4	75.9	81.1	77.1	111.1	40.3	103.4	55.3	181.5	131.5	94.5	56.1	76.6	97.8	41.3	58.1	57.1	64.3	101	79.4
A0A287Y1W9	180.3	108.7	140.6			152.3	124.9	372.4	372.4	272.8	259.8	337.8	263	141.8				92.5	147.3	164.3	52.5	186.8	139.3	284.4	266.8	208.5						140.3	125.6	78.8	93.8	103.6	111.7	333.4	340.4	108.5							91.6	141.5	117.9
M0WSW2	64.4	81	47.9	94.5	111.5	137	100	242.8	228.8	266	154.4	88.5	66.7	62	106.9	92.6	97	49.2	62.4	66.2	35.9	114.4	98.5	58.4	106.5	72.8	306.3	298.4	113.6	261.7	106.4	43.9	86.1	124.9	89	83.3	117	67	48	46.3	84.2	74.6	107.8	168.4	322.8	371.7	98.4	102.7	133
A0A287GQU9	81.4	81.8	79.1	123.3	86.3	136.1	78.9	159	91.2	85.4	109.5	133.7	98.2	71.1	81.7	74.4	63.9	46.4	67.9	76.7	55.5	144.1	63.4	60	77.8	106.6	98.2	107.1	51.3	224.1	99.9	110.5	109.4	153.9	63.7	56.9	82.5	69.1	94.1	75.5	128.2	118.5	87.6	119.4	155.7	118.1	77.3	83.8	119
F2CTB3	62.4	126.5	64	77.8	95.8	60.1	73.7	69.2	97.6	69.5	52.9	78.1	86.2	72.8	70.8	105.1	86.8	43.7	62.6	49.5	41.5	73.9	60.3	26.4	60.2	57.4	51.6	83.3	66.7	78.5	71	77.6	74.7	88.1	90.5	64.8	68	85.5	175.6	78.6	120.8	152.3	126.9	73.3	67.2	63	89.1	90.6	121.6
I1W6L2	177.2	145.1	125.8	111.7	93.6	43.4	34.6	96.1	66.4	118.2	108.5	110.3	75.4	86.3	147.4	127.5	150.1	152.3	145	93.7	49	41.6	38.7	43	42.1	46.2	130.5	136	81.3	87.6	103.7	47.4	45	69.2	70.2	63.5	56.9	59.7	109.6	56.5	55.1	81.5	51.6	39.5	77.9	45.6	46.7	87.4	61.2
A1X809	123.2	110.9	122	46.3	40.5	98	73.2	26.3	21.2	51.9	58.2	56.5	57.2	61.3	94.5	78.4	106.6	117.7	103.5	100.2	336.6	281.6	257.7	159.7	156.7	168.9	21.1	40.1	130.2	139.4	164.3	42.3	41.6	45.6	198.6	177.9	170.2	132.5	130.6	135.9	70.4	71.3	59.7	58.9	41.4	40.3	144.6	119.4	136.4
F2CVK2	136.1	55.7	69.9	122.2	54.7	119.8	55.9	83.8	63.5	79.1	104.3	188.1	74.9	84	49.2	97.5	48.1	50.3	111.1	97.5	68.9	139.2	86.5	82.6	68.4	92.5	96.3	61.9	43.7	155.4	169	137	145	151.9	53.9	89.8	76.4	96.1	119	140.2	183.8	217.7	41	84.1	112.4	66.6	67.3	87.6	138.6
F2EEA9
F2CTM6	44.4	35.4	41.3																					23.7	26.6	26.6												8.8	15.8	16
A0A287EZP5	150.1	113.7	117.5	37.6	36.3	181	154.4	120.5	126.7	45.1	58.1	70.1	71.1	72.3	87.4	89	90.2	84.7	76.4	72.3	107.3	103.2	115.1	79.3	91.7	81.8	42.1	54.3	56.4	74.3	67	106.6	95.1	95.1	83.4	80.7	68.3	71.8	75.1	80.2	51.6	42	45.3	65.1	49.9	62.4	40.4	38.6	42
A0A287XLU8	106.2	159.1	57.2	86.5	139.4	92.9	134.3	112	146.9	139.2	144.2	128.9	108.1	162.1	134.9	119.8	107.2	151.4	111.7	91	122.3	85.5	144.3	80.3	131.8	82.1	89.7	140.8	170.1	101.1	75.5	73.9	91.1	110.5	107.3	113.4	69.3	108.4	85.2	79.1	73.2	104.6	181.5	67.2	135.4	68	56	119.6	116.2
A0A287R942	172.8	159	112.3	116.1	127.1	65.7	79.9	118.8	147.9	133.9	103.9	229.3	148.2	131.1	150.9	126.8	128.9	111.1	172.5	98	73.1	74	73.8	53.6	86.8	90.5	122.1	116.6	44.6	97.5	136.6	118.2	133.5	126.7	95.4	90.6	77.1	117.6	171.1	102	89.2	96.4	122.9	64.4	79.8	66.6	64	84.5	128.3
A0A287JZ63	82	121.2	101.1	152.2	86.5	74.8	86.7	172.3	180.5	68.7	104.9	95.9	104.8	107.9	88.4	50.4	75.8	73.4	92	94.9	83.8	141.1	140	83.9	143.7	54.9	139.8	165.2	43.3	143.2	56.8	110.4	147.5	133.8	60.7	204.7	104.9	138.3	63.4	76	103.5	62.5	91.1	60.2	59.8	74.9	51.8	94.4	81.4
B5LQU6										108	113.1				104.4	111.6	113.5				81.7	175.5	103.3
A0A287WLF1	114.6	148.2	147.5	66.1	66.5	80.3	69.5			29.2	24.9	95.2	81	69.5	54	50.7	54.6	62.6	54.1	58.2	273.5	173.5	309.8	106.9	102.5	94.3	5.8	7.1	67.2	73.4	92	83.8	88.6	75.4	29.5	31.2	36	94.7	70.1	94.4	108.2	92.6	116.9	108	114.9	102.1	165.2	113.6	113.3
M0Z1F6				378.6	340.7	325.3	303.1														404.2	396.6	324.5	501.4	380.6	467.1															658.3	559.8	700.5	266.4	205.7	200.1
F2CVZ1																					1242.5	844	1598.1																								411.9	386.3	397.2
F2DTX2	76.2	83	65.6	55.1	75.8	38.4	42.9	68.9	64.4	57	60.4	93.5	83.3	98	95.2	79.3	113.1	115.8	127.3	96.2	54.2	54.8	59	28.3	30.9	30.4	57.3	88.6	56.1	46.8	52.1	81.5	159.5	125.6	50.4	69.2	43.7	171.6	99.7	108.8	149	100.8	115.3	79.8	86.2	89.2	86	100.3	76.3
A0A287MDR1	133.7	236	150.5	76.9	155.5	35.7	46.9	114.5	148.1	141.4	81.9	131.8	121.7	121.7	76.3	131.8	134.1	183.2	155.7	147	58.6	82.1	71.9	57.3	114.5	60.8	102.8	162.3	92.7	68.9	78.1	63.6	107.1	141.4	78.3	106.3	102.4	175.7	160.8	136	127	124.7	124.7	51.7	92.5	44.1	51.1	82.1	63.2
A0A287X5L7	132.4	145.5	94.1	114.9	85.9	126.1	112.4	87.4	55.1	30.5	22.8	53.5	75.5	70.9	61.9	56.2	56.3	115.3	117.4	102.6	119.3	128	109.2	78.2	57.4	118.8	57.9	72.4	103.4	329	199.1	90.3	81.3	111.3	81.3	140.2	204.6	57.7	70.4	83.5	107.1	83.6	118.7	110.2	103.3	86.7	126.8	136	129.1
F2E067	111.6	94.4	72.1	55.9	95.1	46.1	37.4	46.8	132	65.1	58.5	90.3	85.4	128.7	133.9	98.6	109.3	123.2	121.4	62.3	78.7	37.5	33.1	54	74.1	91.9	61.5	140.1	39.3	61.8	75.3	73.7	51.4	58	82.5	70.3	31.9	120.4	199.8	57.9	45.9	94.6	84	61.7	43.2	64.8	134.3	67.6	97.8
A0A287EA30	139.4	155.4	93.7	50.2	96.3	52.7	46.4	140.8	150.8	98.2	69	81.5	77.7	83	98.1	115.7	90.8	77.2	68.8	88.8	50.6	54.4	28	75.1	69.3	86.2	118.5	154.1	73.8	78.6	64.8	75	87.2	94.4	75.4	72.8	62.6	179.8	180.9	157	82.1	98.1	91.1	57.8	61.2	64.4	37.7	55.5	64.2
F2DMA2	140.3	112.9	102.6	62.3	68.2	37.1	66.3	145.7	120.4	75.3	97.5	158.7	135.3	98	90.1	102.5	98.5	107.3	165.8	117.1	62.8	83.5	63.9	55.3	85.7	57.8	104.3	114.9	78.4	129.6	93.9	135.4	158.4	144	90.8	70.5	101.9	114.4	125.5	106.6	60.4	62.8	79.7	64	59.7	58.2	80.4	70.5	115
A0A287TJH8	218.1	205.4	248.5			72.4	89.2								44.1	46.5	54	89.3	104.9	89	282.2	323.7	196	159.9	66.5	152			180.1	151.9	158.9	235.3	258.8	277.3	87.5	93.3	95.2	169.2	153	172.4				190.3	90.1	175	229.4	97.1	153.7
F2CRU9	105.6	82.1	84.2	54.9	24.4	85.2	55.8	57.8	36.7	39	35.5	19.1	34.6	37.2	28.6	30.3	39.4	56.3	31.4	33.7	124.7	41.2	70.4	69	21.9	95.5	48.7	28	41	21.1	106.8	116.8	43.4	41.5	28.9	82.9	52	237.9	258.7	165.6	80.3	86.1	78.1	115.1	150.7	136.7	171.1	80.6	190.6
A0A287J7G2	70.7	233.1	159.9	141.8	215	157.3	170.5	181.1	159.7	189.8	197	157.2	224.7	171.5	84.3	109.7	107.7	146.1	77.8	176.5	159.4	241.3	214.3	144	172.3	142.4	156.2	182.2	66.3	218.1	40.7	77.8	112.6	216.3	120.7	106.2	152.4	86.6	124.2	27.3	167.3	102.4	120.9	83.6	106.6	115.1	28.9	55.5	93.4
A0A287F3X4	92.7	142.1	110.7	109.9	140.2	51.5	53.3	64.3	70.7	125	132.1	135	156.9	160.5	106.6	122.2	121.7	176.4	190.3	160.9	49.7	53.3	54.2	31.5	31.9	35.7	105.6	132.4	123.3	150	117.9	94.3	95.3	103.2	28.1	28.2	29.6	146.9	110.1	103.4	209.8	103.7	164.8	120.9	123.6	70.8	93.4	86.2	130.8
F2E0R2	167.2	79.8	114	72.7	71.7	157	81.9	72.4	43.9	40.7	46.7	92.1	56.7	74.8	83.5	54.9	52.2	110.8	77.1	86.5	108.5	108.7	132	76.6	54.3	77.3	100	54.7	105.5	94.5	214.8	161.7	69.1	65.7	80.8	93	116.4	154	133.6	143.9	179.6	164.7	141	236.8	48.9	163.9	157.8	89.4	92.5
A0A287J7B3	194.1	249.5	168.1	252	282.9	217.9	101.4	149.2	170.8	175.3	247.1	130.9	223.9	178.8	163.5	143	105	223.4	77.8	133.3	91.4	292.8	301.2	51.1	130.9	54.1	66.9	212.6	99.3	132.3	82.3	30.3	73	230.5	81.9	100.2	146	99.6	52.4	50.2	262.9	123.7	244.1	29.9	79.7	73.4	18.3	69.4	27.8
F2CXF2	148.8	112.8	107.2	106.6	82.5	98.6	111.5	138.7	123.9	77.4	85.3	183.5	152.2	107.4	103	85.9	94.5	82	112.7	98	88.8	78	50.1	48.5	62.7	77.4	79.1	99.8	70.4	123	104.9	116.8	118.7	132.6	63.4	69.4	82.5	75.2	119.1	111	75.7	96.3	84.5	91.8	107.7	118.4	77.7	107	104.2
P15543	67.3	191.3	114.2	121.1	142.2	134.1	88.1	114.6	113.7	116.1	91.4	136.3	87.4	91.9	139.8	150.4	110.8	149.7	98.5	143.5	126.8	93.1	142	78.5	114.4	93.9	77	142.5	104.6	112.1	62	57.7	91.5	138.5	85.2	74.1	67.4	123.3	121.9	121.5	112	84.5	112.6	52.5	153.2	105	43.4	59.5	102.9
F2E5D0	57.4	58.9	57.4	98.2	72.1	68.5	56	42.7	57.3	85.8	88.4	46.9	52.7	68	50	52.1	43.8	44.9	90.3	65.1	42.2	63.9	67.1	79.9	77.6	75.9	88.4	87.5	35.7	28	41.3	32.5	30.3	23.5	41.5	26.2	42.2	207.2	107.8	160.7	156	115.2	127.9	98.4	130.3	68	62.1	60.2	79.7
F2DYN1	89.9	114.4	90.4	142.8	150.4	145.2	125.5	190.8	106.3	107.8	143.4	145.8	124.2	84.3	112.4	99.9	96.2	74.1	97.5	108	60.6	153.4	147.9	67.9	123	85.9	116.2	88.2	72.9	99	45.1	88.3	153.1	149.6	88	88.6	126.1	118.4	54.3	78.4	99.8	82.1	93.2	99.4	221.1	89.4	38.1	95.6	70.6
A0A287URD7	139.8	170.1	150	78.7	108.9	70.8	71.5	157.7	158.2	157.9	116	123.9	101.4	138.5	147	204.7	140.6	136	145.9	123.7	63.5	76.6	56.3	79.3	80.8	87.9	142.3	157.7	66.9	58.3	41	40.3	64.7	49.3	93.1	92.7	74.9	116.6	99.1	121.8	1435.6	955.8	117.6	40.9	40.7	40.3	84.7	72.6	79.5
F2D810	66.3	60.9	61.1	83.7	54.1	79.7	56	65.9	52.9	77.4	90.3	244.9	235.6	53.1	26.7	31.8	33	128.9	148.2	159.7	334.7	271.7	349.3	39	52.3	39.2	77.8	53.7	90.2	96.2	90.1	72.8	100.9	93.6	42.7	36.5	46.7	63.9	45.6	63.6	84.4	88.1	70.2	50.5	76.3	43	56.2	47.2	85.1
F2DUI8	73.9	119.1	109.3	27.5	12.9	115.2	80.6	10.8	17	17.8	24.2	28.4	22	63.7	22.2	40	15.2	86.5	13.4	12.2	367.9	98.4	288.3	158.8	63	104	40.9	22.7	134.8	140.5	201.9	141.7	176.6	120.3	92.6	34.4	55.9	54	56.3	108.6	50.3	25.2	49.2	445.1	188.5	109	518.9	461.5	402.3
A0A287UW51						203.4	238.5	72	92.8	174.4	179.2				45.1	25.3	44.6				76.6	66.5	109.7	90.7	93.2	106.9	23.4	12.3	309.5	236.1	125	41.5	45.4	38.9	25.9	29.1	33.7	41.1	33.1	17.5				136	160.2	126.5	205.1	135.7	156.8
F2CSC0	119.7	90.4	94.8	65.2	77	109.1	132.3	92.7	117.8	139.1	131.2	98	125.6	116	63.9	135.6	84.3	106	75.3	75.4	184.9	57.3	71.8	230	119.8	181.4	120.9	127.9	153	86.3	127.6	99.9	80.3	87.6	112.9	97.5	54.7	93.2	185.2	88.7	78.5	127.8	84.6	140	145	136.6	197.2	109.2	194.4
A0A287MLU1	104.3	148.4	112.9	79.7	83.8	77.8	62.6	154.8	154.3	113.7	100.6	95.5	114.7	121.7	147	104.9	118.4	114	163.4	125.9	39.3	57.6	73.8	62.8	107.6	76.2	109.8	143.4	32.5	88.1	29.6	56.9	95	79.5	80.9	110.3	102	179.8	101	142.3	65.3	63.3	72.4	57.6	127.8	69.7	70.8	113.5	90.8
F2DIR3	174.5	162.5	190.1	151.4	82.3	77.8	69.2	73.1	48.5	34.1	30.5	64	66.3	80.8	51.6	77.8	46.4	58.6	60	61.7	318.6	160.8	178.5	106.7	110.6	105.2	31.9	45.3	163.8	148	163.5	127.3	85.2	48.2	105.9	143.9	131.2	67.5	76.3	113.1	153.5	64.3	70.2	134.9	95.1	106	211.1	153.2	129.1
F2DAK8	93.4	171.9	100.8	219.2	194.2	100.8	184.1	151.5	181.2	191.9	214.5	141.8	147.2	114.7	213.5	99.6	137.3	42.1	31.5	48.1	101.3	160.8	266.3	81.2	123	81.5	89.6	174	140.2	97	65.1	63.7	143.7	123.6	149	146.3	174.3	78.4	42.6	84	94.3	97.4	150.6	65.8	94.9	72.9	69.9	69	131.6
F2D1N1	93.5	74.2	43.4	68.2	93.3	96.9	47.1	66	66.2	114.3	104.6	109.5	57.7	63.2	96.7	60.1	88.7	67.5	161.3	111.6	48.5	89.7	123.5	74	81.4	48.5	120	57.2	80.8	93.4	136.6	107.8	163	121.3	56.4	74.9	85.6	83	70.7	129.7	63.9	116.1	150.9	159.3	239.6	123.4	87.4	70.4	156.7
A0A287T8M5	198.4	64.8	212.4	39.5	41.8	99.7	99.3	19.3	36.6	32.2	35.4	8.1	34.5	48.9	11.8	49.4	30.7	91.7	51.4	62.5	152.7	38.2	110.5	94.9	37.3	85.2	60.4	87.7	66.7	113.2	140.3	160.1	89.4	40.4	107.2	106.6	103.7	123	105.8	170.8	62.1	125.9	115.1	129.3	56.9	68.8	270.6	145.7	157.5
T1TD43																																102.2	81.7	116.1
A0A287SWB6	86.8	81.6	128.2	102.9	92.1	120.4	62.9	126.2	87.1	46.8	105.6	32.1	88.4	87.4	75.9	50	79.5	50.8	124.5	154.8	24.3	135.8	182.3	18.6	86	63.5	71	52.4	109.1	190.4	58.7	47.2	123.9	133.9	78.7	166.9	161.9	247	66.9	118.3	187.8	109.2	84.2	57.3	170.1	58.6	61	103.7	64.4
A0A287VF07	147.2	134.3	149.3	19.1	19.9	66.9	68.5	42.3	39.5						52	46.5	29.3	49.2	51.8	53.3	301.1	230.8	246.4	148.4	134.8	153.3			76	87.6	81.4	66.4	72.5	51.1	123.5	157.4	148.8	22	31.1	27.3	87.7	83.2	72.7	123.5	139.9	148.9	208.5	213	243
F2DDI1	124.2	131.1	123.1	49.5	54.9	81.3	61.2	97.2	72	35.3	28.2	163.1	78.4	103.3	74.7	86.4	71.6	71.1	82	138.9	139.3	132.6	150.5	130.7	98.2	111.1	159.4	116.3	102.1	106.4	81.5	139.6	125	137.2	93.3	114	82.9	147.3	121.9	123	59.7	51.6	75.6	126.1	199.1	127.8	145.7	160	93.7
A0A287QYP4
Q40036	9.9	9.5	8.8	2	3.4	8.2	9	3.7	1.9	2.4	2.3	7.8	8.6	9.1	2.6	8.4	2.7	62.3	19.6	23.4	12.7	13.8	10.2	19.3	3.3	16.7	12.5	7.8	3.3	3.3	2.9	23.4	24.2	53.5	3.4	12.3	2.2	40.4	29.8	27.7	17.7	13.5	9.1	10	25.2	12.7	7.8	6.2	9.1
F2DJB5	98.2	99.2	86.2	98.4	79.4	98.3	75	134.9	95.8	88.4	83.1	150.1	97.2	79.3	83.7	97.5	79	71.6	135.7	104.6	43.8	102.4	90.9	71.6	92.5	78.6	110.4	112.2	66.8	93	84.2	94	113.9	98.1	81	88.7	105.6	107.9	92.7	93.5	93.8	90.2	80.6	72.6	119.2	92.3	76	76.4	137.2
A0A287PYF7	157.5	105.1	169.2	167.6	95.2	138.6	155.4	98.3	111.2	87.3	124.8	102.4	132.1	120.1	85.9	94.6	69.9	109.4	73.3	102.4	221.2	124.5	101.5	165.2	85.7	129.7	97.9	73.3	156.4	106.3	161.2	160.1	70.5	106.1	110.9	171.6	187.6	96.8	99.2	124.3	113.2	85.8	69.7	138.2	96.1	103	197.6	149.4	105.5
Q43472				266	246.8			377.2	527.7						467.9	219.1	554.2				280.2	246.4	571.2				220.7	742.2							373.9	356.6	342.2				225	202.7	178.6				601.5	431.1	308.5
F2CPV8	96.5	117.1	170.5	82.1	96.9	48	55.1	83.2	72	78.6	90	119.8	94.9	102	49.1	122.3	62.8	98	101.1	81.7	315.2	77.2	83	159.1	43.7	129.5	67.8	80.5	97	87.7	78.8	66.2	132.9	87.7	117.1	179.1	63.1	113.3	92.4	61.2	95.5	156.1	57.7	102.6	90.8	63.1	99.7	57	109.6
F2D127	48.8	95	23	24.4	111.9	90.5	87.8	25.5	128.5	120.1	86.7	101.4	79	108.2	110.2	132.3	100.8	114.3	100	105.5	156.8	161.3	116.6	163	208.4	196.3	282.6	205.1	105.7	102.7	86	15.2	9.9	12.6	101.7	52.8	65.3	22.5	57.4	12.4	73.7	115.4	97.1	14.3	11.6	15.4	42.6	33.4	55.9
F2D3V8	93.2	141.2	105.5	146.3	156.3	91.5	73	118.6	103.2	112.4	70.8	72.8	107.2	112.7	124	86.5	102.1	98.5	124.8	141.1	43.7	112.2	157.1	34.2	84.8	56.5	62.1	101.5	64.7	79.5	57.9	77.9	64.7	85.4	106	105.4	120.8	165.6	70.1	74	120.6	72.1	156.1	59.2	94.8	62.8	60.9	78.3	69
M0YI48	101.2	57.1	125	88.7	94.9	133.3	112.7	87.3	107.4	85.7	80.6	84.4	58.5	137.4	58.8	73.9	79.6	44.8	119.2	112.7	78.7	43.4	83.3	69.5	68.5	82	55.3	97.4	102	51.7	74.8	109.6	102.2	111.9	101.4	66.4	78.9	74.3	106.2	110.2	77.6	138.8	96.8	87.9	106.6	103.9	89.7	84.9	126.3
F2D788	116.6	121	84.6	119.9	126.5	100.4	108.6	133.4	110.3	135.7	114.1	129.6	86.8	75.6	105.3	109.8	115.7	96.9	129.5	100	89.6	129.8	116	64.4	94.2	50.4	95.7	107.9	50.5	88.4	75.2	110.6	159.4	131.3	96.8	80.5	97.5	93.5	106.7	125.4	108.7	129.7	134.5	68.7	119.3	83.7	72.8	61.8	116.4
A0A287WGT6	48.6	60.3	74.2	89.2	132	73	119.5	152.4	126.4	102.7	146.5	98.6	126.4	109.5	88.9	84.2	153.8	113.1	191.8	129.4	124.1	157.7	135.3	48.5	141	75.7	158.5	118.8	98	150	98	100.2	133.9	128.8	95.1	62.1	68.7	156.3	64.8	98.5	82.9	90.5	120.7	95.9	119.1	109.5	97	80.8	106.2
A0A287U980	108.8	191.7	128.4	102.4	144.6	84.1	83.1	167.7	167.8	101.3	78.7	96.7	130.2	166.9	153.3	155.3	160	163.5	160.6	176.5	66.1	51.1	50	80.8	88.9	79.6	141.3	132.2	38.6	62.4	36.3	89.2	87	102.4	78.3	97.9	80.6	200.8	121.6	169.9	62.4	76.1	89.1	58.8	81.1	46.4	73.2	84.8	86.3
A0A287TR47	213.5	19.5	277.2	62.6	9	122.2	98.3	18.1	4.7			8.6	126.7	9.8	6.3	6.4	2.7	148	59.7	29.5	253.5	23.8	115.2	96.5	5.6	117.8	30.6	23.6	118.8	22.4	171.8	238.4	10.5	90	103.2	16.3	121.5	205.9	155.1	189.3	129.3	187.1	136.6	154.7	121.9	95.8	312.9	156	86.3
A0A287U8S1	178.6	151.6	151.1	58.4	63.5	98.6	120.3	9.4	14.7			15.8	15.4	16				147.9	204.2	177.3	277.3	249.1	280.4	118.9	135.2	135	42.8	39.9	120	120.4	80.2	151.7	209.8	187.5	86.8	99.9	99.2	19.1	21.9	17.1	164.7	54.8	94.7	63.1	80.9	94.7	206.5	206.1	253.7
M0XJ70	107.6	133.5	95.9	145.3	173.9	88.9	97.2	180.6	183.2	169.1	172.3	156.1	122.5	117.3	108.1	53.2	140.1	124.1	149.3	54.6	134.3	192.2	120.4	68	159	90.6	129.6	161.4	61.6	162.9	134.5	159.6	202.2	190.4	70.6	102.7	99.7	146	99.7	114.5	124.3	88.8	161.2	97.2	88.3	80.2	77.2	138	123.9
A0A287K0K3	120	179.2	96.7	104.3	105.2	59.2	98.9	60.2	166.4	140.9	127	78.1	79.3	123.2	153.7	144.2	116.5	93.5	105	63.7	86.8	80.6	70.4	75.2	107.4	98.7	83.3	107.4	99	46.6	87.3	42.4	98.7	132.2	111.1	138.9	111.6	108.4	129.1	110.5	43.6	93.1	96.6	41.5	84.7	72.9	68.9	65.8	136.9
Q9M4B1	109.8	76.6	93.7	50.5	39.7	159.2	123.6	34	33			78.8	84.4	79.9	71.1	68.6	74.5	103.4	100.9	108.7	139.8	95.6	114.2	119.3	116.3	124.2	42.9	41.2	74.5	82.7	86.5	126.8	71.4	145.8	113.3	167.5	123.4	100.4	66.4	117.3	34.1	31	29.5	144.4	154.2	179.7	197.2	222.4	199.9
F2E6D7	91.1	63.3	92	96.6	60.7	39.6	44.7	62.3	62.4	22.3	27.6	111.9	128.4	61.3	30.4	38.3	41.8	73.9	137.2	59.1	105.3	68.6	62.3	90.9	41.1	59.9	59.3	23.7	51.9	119	73.3	152.6	128.8	121.8	57.6	26.5	49.5	71.5	147.5	117.5	85.7	164.8	75.6	76	31.7	44.1	156.6	57.3	140
A0A287SXA5	135.8	155.6	131.3	108.3	135.8	51.2	32.8	95.2	96	35.1	40.2	114.3	121.6	131.9	84.8	92.1	59.2	74.6	54.8	63.9	140.6	122.2	127.5	56	68.9	46.8	86.2	87.4	103.6	103.9	73.7	104	133.2	134.3	109.6	85.8	85.2	124	102.3	108.4	169.7	92.9	120.6	55.2	59.4	60.5	65	64.7	89.6
Q43470	109.4	162.8	193.7	114.9	117.3	133.1	133.6	77.9	101.4	38.5	61.3	89.2	70.9	77.4	67.6	137.5	75	123.2	79.3	94.7	210.1	181.5	143.4	94.8	86.2	116.2	81.5	55.9	153.5	88.3	111.6	113.3	74.9	70.4	112.3	142.5	115.4	105.7	67.4	97.9	112.1	94.3	99.1	77.5	92.1	69.5	203	134.9	107.3
F2CXA7	235.1	208.6	176.8															40.4	35.1	34.9	119.4	98.4	164.1						264.2	224.4	270.5	192.4	176.7	181.4				126.9	113.9	126.2				320.8	264.6	371	719.7	709.1	769.2
F2D6H6	71.5	74.6	66.6	143.9	79.3	121.2	23.1	172	86.2	94.2	109.4	150.8	108.7	73.8	104	60.9	88.2	53.7	101.9	109	42.8	133.1	121.2	38	105.5	66.5	130.5	83.5	76.8	128	70.9	95.3	147.3	106.8	73.6	60.5	149.8	80.3	66.2	85.9	140.5	106.4	81.5	80.5	160.4	75	57.2	88.4	98.8
A0A287SJM9	83.8	87.1	84.9	81.8	72	77.8	12.6	82.2	61.8	78.9	60	142.5	96.1	80.6	112.3	76.2	92.5	83.6	156	110	58	90.6	77.2	50.9	75.7	51.1	113.1	108.3	57.6	75.3	66.9	124.1	129.6	115.7	59.2	80.4	95.3	147.1	92.4	95	76.1	75.2	75	85.4	107.8	71.3	49.2	65.8	76.8
A0A287WRG3	126.8	120.3	53.1	98.2	116.1	75.3	166.7	68.8	182.6	156.7	143.7	143.1	129.2	145.5	72.7	85.5	108.5	102.1	107.5	71.3	105.6	66	54.9	62.5	114.9	94.1	100	202.8	142.6	55.5	156.8	109.3	94.3	62.4	89.9	44.4	32.4	101.2	130.8	89.4	91.6	132.7	206.3	76.8	110.2	94.1	77	66.2	152.5
A0A287FWV2	91.4	98.6	77	32.2	47.5	70.1	53.9	67.1	95.1	45.6	32.4	118.4	110.7	105.3	99.1	78.6	63.8	67.9	71.5	65	66.9	68.3	90.9	68.5	73.7	65.4	49.4	85.2	47.1	55	47	70.2	91.5	87	47.6	62.7	28.9	82.2	78.4	73.9	121	134.7	149.4	87.3	119.4	96.8	53.6	74.6	69.7
A0A287I2U9	54.8	119.7	104.5	52.8	161.4	49.9	122.6	48.7	104.4	164.2	134.5	88.4	111.7	167.8	206.7	146.3	166.1	144.8	81	69.3	111.5	84.4	155	73.3	131.2	84.3	77.5	137.8	38.2	49.9	33.7	63	85.6	55.9	118.4	86.8	78.3	50.9	34.8	41.1	114.1	81.4	167.3	57.5	118.6	80.2	50	40.4	80
A0A287IVP4						240.9	263.7																																					438.2	614.4	421.9	486.4	355.8	502.8
F2DY31	92.6	78.2	97.7	76.2	61.8	124.9	68.1	71.5	58.1	49.9	55.4	55.7	69.4	45	51	48.7	40.5	72.3	65.8	59	86.9	73.9	93.6	83	78.1	71.3	91.1	61.2	49.2	106.9	70.6	102.9	145.5	209.4	45.8	87.3	79.3	135.8	70.3	91	77.7	84.1	52	65.6	41.5	48.6	120.1	130	62.1
A0A287WZD1	75.6	97.1	120.9	165.8	166.1	99.7	149.4	187.8	142.2	153.8	149.7	209	197.4	135.8	110.1	166.3	135.8	102.8	114.4	141.1	135.6	177.6	134.2	81.4	101.3	102.4	122.2	105.4	111.9	144.1	123.2	118.2	145.4	125.9	117.3	80.5	133.2	76.7	108.3	104.5	144.6	101.8	128.3	90.6	140.3	100.8	94.7	96.9	121.1
A0A287JVV6	99.3	92.9	85.7	93.6	93.6	69.6	123.4	98	104.4	95.6	56.2	112.3	101.4	90.1	112.6	103.3	116.6	69.9	117.1	95	93.8	103.3	99.8	55	74.3	53.1	69	73.5	55.8	86.8	79.4	99.7	100.4	91.9	85.7	119.1	97.9	169.8	170.6	181.9	59.2	73.2	142.6	120.1	119.9	104.9	40	44.3	66.4
F2DT02	84.4	79.4	117.2	63.6	45.9	37	33.4	44.2	45.9	50.4	36	121.9	122.6	122.2	54.4	48.9	61.9	117.3	74.9	85.9	156.2	79	81.4	180.7	113.8	127.2	71.3	68.7	110.2	110.2	111.6	151.6	124.9	93	76.1	101.5	86.6	96	152	150.2	83.1	45.6	48.8	208.7	155.4	202.3	167.6	171.6	129.4
A0A287X3U5	72.4	114.2	83.3	109.7	110.2	70.7	138.5	62.6	77.2	106.6	88.4	73.5	71.6	80.6	101.5	73.8	71	95.8	110.5	100.5	89.7	154.1	171.1	46.6	77.3	56.8	83.5	76.5	85.7	84.5	59.1	68.2	103.2	86.6	98	83.5	80.4	128.9	66.1	94.7	102.4	77.5	119.1	66.4	123.1	72.2	53.9	91.9	81.5
M0XC90	109.2	95.6	102.4	49	49.8	19	42.9	41.3	39.9	40	34.3	47.9	27.8	47.2	162.3	135.6	146.1	51.4	43.7	32.5	85.5	91.5	72.6	31.6	62.8	48.9	80.6	80	31.8	25.9	31.5	65.6	57.1	63.1	58.4	54.6	54.4	62.2	83.6	78.1	111.6	87.5	140.7	128.3	133.8	134.5	46.4	48.7	71.1
F2CXH1	103.4	81.4	102.3	55.8	61.9	118.5	101.8	116.2	51.2	39.3	98.1	165	98.9	100.9	137.8	92.4	84.7	62.4	201.4	125.7	121.2	76.8	88.4	81.2	67	89.7	118.2	78.5	92.5	120.3	155.7	151.3	112.4	75	69.8	79.6	65	139	140.9	106.6	83.3	83	53.1	134.4	120.7	129	68.3	62.4	141.3
F2D1F3	127.4	137.8	160.9	53.6	48.3	54.6	50.4	13.5	15.5			37.1	21.7	35.2	82.4	87.4	97.4	88.6	75.3	80.6	327.4	236.1	300.6	238.3	157.6	184.6	47.6	42.1	102	111.9	96.7	86.6	93	83.7	110.6	117.8	118.2	74.4	67	79.7	95.4	75.8	76.7	162.2	164.5	155.8	220.7	162.8	196.8
F2CWR0						95.3	112.7			22.5	21.4	141.2	154.9	126.9	46.2	38.4	23.2	32.2	37.2	32.8	29.9	30.3	12.1	54.6	62.6	65.9			71.9	45.1	77.3	71.4	55.6	51	64.8	77.2	63.6	20.6	19.1	20.9	73.4	61.8	81.4	17.7	22.8	25	99.4	114.2	107.9
A0A287W7N2	45.8	175.1	71.3	132.3	102.5	53.5	51.9	119.5	153.8	105.2	76	89	177.5	106.4	74.9	168.4	167.8	70.9	149.7	128.8	44.7	181.2	89.8	27.8	91.1	67.6	150	103.2				113.9	87.9	70.3	75.3	52.9	106.5	63.6	129.2	106.8	65.9	84.9	69.3	74.6	75.3	45.5	60.7	83.2	90.9
Q19D39	151.6	123.7	149.5	200.2	141.4	199.6	180.7	63.8	57	44.3	74.9	127.5	120.1	114.8	54.7	64.3	61.2	49.2	50.2	61.9	226.7	152.4	195.3	123.2	96.8	112.6	41.3	40.8	154.1	154.5	190.9	186.1	149.6	133.7	186.7	217.1	198.9	134.7	108	132.1	118.1	63.2	91.7	125.9	112.2	100.8	205.5	145	159.6
F2EAD0																		13.3	13.7	14												28.6	23.7	19.7										37.7	35.1	42.9	15	16.7	13.6
F2CYP0	101	95.8	115.4	141.4	99.6	117.6	132.5	107.4	102.1	123.4	121	126	82.8	60.4	111.9	111.7	115.4	77.2	72.5	70.5	188.6	138.5	121.5	44.8	89.5	54.4	97.5	78.8	105	176.1	118.5	120.4	129.5	164.7	108.5	127.7	154.5	61.5	67.8	107.2	97.4	121.4	115.3	91.5	98.3	74.3	109.8	92.6	112.2
F2DFT8	55.8	45.9	33.1	82.7	51.7	26.7	59.4	47.2	59.3	98.6	87.4	92.6	61.7	54.2	52.2	53.1	48.4	37.3	203.5	83.4	48	45.5	82.3	49.2	41.7	31.6	63.1	40	31.6	34.4	56.7	70.3	141.5	72.2	87.1	54.1	34	157.3	173.7	91.4	112.4	273	78.1	103.8	68.5	137.1	105.7	70.8	204.9
M0UGZ2	252.1	196.7	324.5			95.8	101.2					92.9	93.7	84.7							170.2	110.5	146.6	99	164.7	162.6									126.8	192.9	188.7	259.1	233.3	301.9				203.2	256.3	209.7	564.2	555	665.9
Q70YJ6	77.3	125	64.8	83.3	108.8	49.6	61.6	103.5	107.8	100.1	47.6	76.2	95.9	90.6	118.4	79.1	102.8	68.6	85	78.6	75.7	71.2	106.4	37.8	73	47.9	93	94.2	81.6	80.6	57.3	65.9	89.8	82	78	70.4	73.3	88.9	52.3	69.8	84.2	87.7	129.3	53.2	113.8	77.7	54.8	95.4	67
F2CQP0	125.1	76.8	161.8	109.7	76.8	171.9	114.7	73.3	70.8	63.1	73.4	61	111	102	43.6	115.2	54.8	102.2	54.6	80.4	298.1	101.4	49.6	229.8	92.5	183.6	112.2	80.9	179.5	74.4	211.4	207.8	50	81.6	106	123	131.2	23.5	101.5	142.4	120	99.5	18.8	194.3	38.7	160	318.5	163.4	111.9
F2E9Z6	110.7	118.5	112.5	79.1	74.6	59.1	40.9	119.6	77.9	56.4	55.7	99.8	103.8	98.1	125	99.4	108.9	96.6	174.9	135.5	66.9	103.6	114	55.3	59.1	51.8	77.2	96.7	76.3	81.8	72.3	65.6	98	78.8	99.4	94.9	135.8	150.8	82.7	100.6	113.7	105.3	124.7	86.8	116.5	77.1	79.7	90.5	91.5
F2DF61	105.9	106.7	69.3	108.6	95.7	80	63.8	96.2	73	79.4	83.1	122.4	104.7	78	111.1	93.1	98.1	83.5	138.7	101.4	64	93.9	101.1	55.1	89	63.8	83	73.9	76.5	74.4	73.2	109.6	156.6	111.1	98.9	85	110.8	93.2	90.8	110.5	96.2	115.8	112.3	88.7	115.3	82.9	52.8	61	109.8
M0UYP0	109.7	87.1	89.2	45.2	75.1	90.5	44.7	118.7	88.5	98.9	105.6	122.9	88.1	81.7	74.2	96.2	92.3	98.1	174	102.1	53.1	77	100.9	63.4	110.8	68.6	120	110.2	66.3	134	92	91.5	147.9	104.5	65.4	87	60.4	154.2	133.3	91.5	71.1	117.9	91.2	111.4	146.1	101.6	89.5	76.4	150.5
F2DXD4	157.8	39.4	55.3	90.5	40.9	90.6	56	172.2	84.3	30.4	47.8	134.4	50.1	74.9	55.5	22.4	47.1	85.2	139.6	85.8	76.6	61.9	89	16.6	33.3	20.2	119.4	82.2	63.2	110.1	80.8	87	167.9	157.5	89.5	84.9	90.3	90.9	104.6	104.9	94.6	139.8	100.6	77.6	123.7	94.8	57.6	69	108.9
A0A287NYJ2	158.1	238.2	65.3	200	251.6	89.5	107.3	211.2	422.6	160.8	206.4	87.8	91.8	50.6	298.1	167.8	230.3	143.5	96.3	71.8	70.4	147.4	175.2	83.2	93.6	47	68.5	168.9	276.6	161.2	80.2	67.8	121.7	88.1	291	193.4	130	100	48	40.2	145	139.1	205.3	29.8	32.1	26.2	44.8	111.1	150.8
A0A287P2Y9	96.5	100.3	118.8	176	119.4	96.9	139.1	107.3	116.1	79.4	122.3	66.7	121.7	88.3	118.4	210.8	91.6	97.4	51.5	78.9	237.8	144.4	154.9	166.3	128	164.7	103.4	89.7	117.9	87	107.3	120.6	82.6	103.9	112.7	183.6	151.1	56.8	80.8	83.4	98.4	79.1	52.8	121.7	94.5	94.1	190.9	134.8	150.5
F2DAC0	120.8	104.1	110.2																		295.6	74.4	410	253.6	294.8	196.7									178.3	206.9	265.4				52.1	66.6	62.2	19.6	21.5	14.6	178.8	221.9	206
F2DVR4	153.3	156.3	123.6	105	129.6	77.1	41.4	96.9	68.4	95.5	53.3	131.3	69.2	102.6	110.2	83.9	94	105.9	171.6	119.8	78.5	97.5	88.5	42	64.9	69.5	105.5	113.1	77.2	99.6	84.6	84	114.7	101.7	81	88.9	66.5	159.5	112.1	133.8	143	142.6	204.2	77.5	124.7	81.6	42.4	62.8	74.1
F2D5K7	81.7	114.4	71.3	56.9	121.8	94	99	85.9	103.7	61.5	35.8	57.6	68.1	66.6	79.4	104	60.9	99.1	77	72.7	120.8	128.6	111.1	93.2	70	91	69	133.3	68.8	73.2	59.8	87.2	82.3	89.5	62.1	73.1	34.7	81.7	87.2	46.9	73	75.5	57.4	117.4	99.1	117.7	115.6	86.6	78.5
A0A287UL55	84.2	112.7	128	103.5	148.5	193.6	190.5	166.6	192	217.3	226.6	188.6	164.7	226.3	114.4	127.5	132.8	119.3	237.3	156.2	84.7	112.8	91.7	84.4	128.7	61.2	205.9	196	151.6	132.7	159.2	40.9	73.3	75.4	116.6	116.1	126.8	118.4	56.1	61.5	188.9	139.4	183	40.2	111.7	42.4	56	59.2	67.6
F2EF71	151.1	106.5	49.7			40.3	44.8											51	45.8	44.7	56.2	22.2	25.1				22.5	21.7	75.7	99.4	71.3	274.2	299.2	228.1	66.8	50	65.4	140.6	58.8	197.2	74.7	67	69.3	83.8	62.8	41.5	470.7	72.6	17.5
A0A287KH95	133.3	103	164.8	67.9	59.4	100.7	67.6	17.8	19	18.2	21.5	47.7	45.1	64.4	95.7	79.6	84.6	82.4	89.1	92.4	198.9	79.7	118.2	226.3	143.7	168.1	86.1	91.2	141.8	124.6	127.7	138.6	87.4	61.3	79	97.9	81.5	115.1	87.3	114.4	38.8	30.9	31.2	169.2	122	138.7	265.1	136.7	158.1
A0A287GDC9	73.5	60.5	77.3	96	96.3	146	123.5	67.5	56.3	136.1	97.3	105.4	96.7	127.6	90.1	76.4	87.1	82	61	127.2	47.9	46.6	48.7	77.2	76.1	76.8	25.1	27.8	137.9	102.9	83.2	42.9	37.7	31.5	96.6	98.9	113.9	176.9	176.7	261.6	109.8	82.5	80.8	112	164.9	145.9	146.4	153.7	209.8
A0A287RG57	65.8	84.1	81.3	93.6	79.1	69.6	61	109.2	110.6	63.3	69	97.9	101.6	96.6	137.3	126.1	104.6	78.8	109.9	107.3	26.8	25.5	28.2	57.5	83.2	69	90.3	102.4	51.2	91.4	75.5	15.7	10.2	14.4	61.6	65.8	75.5	219.8	237	139.7	125	153.8	122.8	30.1	28.4	34.4	108.8	117.8	150.4
F2CSC5	94.7	132.7	76.4	99.4	133.9	87.5	106.7	118.8	143.8	168.1	120.6	90.1	132.5	88.8	115.9	144.6	142.5	95.6	76.3	65	72.4	105.4	69.3	90.1	94.5	87.5	115.3	162.1	81.8	111.8	68.4	70.6	107.3	112.7	105.7	100	70.3	54.8	92.9	95.8	92.1	131.1	99.4	70.8	97.4	79.4	118	77.8	169.2
F2DH67	76.7	57.6	79.7	28.5	31.4	684.2	518.1	96.9	86.1	153.5	99.7	58.5	64	69.9	125.6	163.6	178.9	20	20.2	14.7	67.3	80.9	56.4	299.1	214.4	341.1	189.4	207.5	194.4	172.7	238	196.3	148.6	151.1	186.2	148.5	121.2	34.9	42.5	42.8				357.4	249.5	402.1	127.3	146.9	172.2
F2CS54	21.9	38.6	41.7	137.6	129.8	308.8	282														435	292.1	444.5	134.4	166.5	145			97.4	101	87.2										60	71.2	53.8	147.7	113.6	103.6	331.2	368.9	325.6
F2D7Y7	187.8	7.7	26.9	63.4	52.9	196.6	189.7	200.8	89.6	9	8.7	176.2	38.9	113.9	1.3	1.1	1	78.2	79.4	52.7	33.8	60.4	68.1	40.7	38	37	119.8	135.1	242.5	219.3	174.8	146.9	210	143.4	6.1	49.6	84.4	58.3	76.6	121.7	113.2	132.7	7.8	161	216.5	136.6	107.8	120.4	136.9
A0A287PFD1	140.5	98.5	201.1	117.8	51.1	158.2	182.2	88.2	80	61.3	68	40.3	86.5	114.2	35.2	102.1	26.5	136.3	43	197.6	280.1	81.7	42.8	331.7	97.1	217.4	174.5	73.1	242.6	85.9	129.2	126.8	29.7	40.5	162.5	235.4	185.5	52.1	101.7	141.6	107.5	68.6	26	216.5	51.2	166.7	200.7	214.6	63
O48518	66.1	55.1	135.3	48.8	51	93.8	83.3	8.9	21.8	29.9	34.2	62.4	56.3	73.5	51.6	47	59.5	106.1	121.3	106.3	257.7	201.6	182.8	457.4	209.4	204.7	76.3	56.8	126.3	69.3	50.8	44.9	47	32.3	90.8	73.7	64.9	94.6	82.7	115.9	84	53.6	33.6	440.7	200.3	92.6	177.1	80.4	77.1
A0A287TXN8	65.9	126.4	81.6	74.6	102	17.4	19.9	57.1	76.2	73.4	70.9	66.7	47.3	56.6	84	80.4	61.6	78.9	73.2	65.1	26.7	25	33.8	31.9	47.4	33.8	70.2	96.3	25.3	39.9	39.8	27.7	30.2	32.8	67.5	74.7	65.3	178.6	95.1	73.9	102.1	69	103.1	70.5	69.7	80.1	95.8	56.1	68
A0A218LNB6	87.8	91.4	194.2	86.7	49	125.3	238	43.2	68.2	61	67.3	42.9	94.9	107.4	54.3	88.2	56.3	155.1	62.4	151.4	340.2	66	82.8	296.4	91.1	181.3	109.6	62.3	228.3	62.1	124.3	114.6	44.7	37.8	137.5	220	164.1	52.3	72.6	95.4	71.1	65.8	49.7	168.2	67.3	137	247.5	200.3	50.4
A0A287JIT5	99.5	188.9	40.9	57.3	88.8	82.9	62.6	105.9	144	174.8	150.1	94.5	126.9	83.6	155.3	124.4	117.3	62	124.1	66.1	80.6	44.6	44.3	91.1	162.7	121.4	85.3	194.3	140.2	85.5	85.5	69.8	80	59.8	98.9	91.4	91.2	52.4	86.4	72.7	47.6	94.7	91.7	51.1	128.4	60.9	94.1	99.4	178.9
A0A287S8C1	26.1	26.1	30.2	71.2	42.9			79.7	85.9	72.8	108.6	31.9	40.3	76.4	66.3	64.3	49	39.6	54.2	46.1	35.7	39	38.7	70.5	98.7	66	109.9	98	43.4	67.6	87.9				58.5	41.5	31.6	68.1	67.7	93.8	73	62.4	33.6	43	37.3	42	47.9	86.6	90.4
F2CVR8	128.9	105.7	109.2	141	94.3	75.8	81.5	128.6	98.8	95.8	104.8	131.7	123.2	86.9	109	111.1	131.4	86.3	121	146.1	63.9	113.6	132.4	62.5	86.7	61.9	166.4	96.3	129.4	88.7	83.8	121.5	159.8	88.3	72.2	82.1	112	126.2	91.9	77.7	91.7	77.1	139.1	82	230.1	89.4	55.5	90.8	126.3
A0A287KFS3	203.9	120.2	58.6	128.3	113.4	112.8	130	91.6	117.4	81.3	102.4	119.8	109.7	70.7	89.7	138.7	103	104.8	113.9	94.5	35.1	112.4	52.3	36.5	84.5	121.5	19	33.7	141.3	177.2	146.6	63.5	129	58	139.1	159.4	143.3	151.4	191	158.1	89.8	123.3	101.8	33.6	35.8	30.6	87.3	67.5	91.6
F2CY68	149.3	176	141.6	20.5	25.2	43.6	52.6					24.6	20.9	25.9	30.5	25.8	25.7				164.6	169	210.1	159.8	143.8	145.9	15	16	21.7	27.6	33.4	61.2	76.1	68	59.7	57.8	66.5	74.8	81.1	58.5	26.7	24.5	20	160.7	115.2	122.7	257.1	218.4	236.4
F2D9M2	123.2	191.1	153.8	64.1	96.9	35.4	61.4	160.1	155.4	71.8	42	72.7	106.6	124.2	105.9	82.5	65.6	125.5	95.8	118.5	92.9	53.8	63.4	45.7	64	101.7	128.7	136.2	71.4	111.4	66.2	62	56.2	64.5	53.3	65.8	38	213.6	162.9	61	65.1	62.6	91.9	53.4	96.5	77.3	76.2	111.6	121.8
F2E2M2	122.6	106.8	78.4	204.7	123.9	187.2	171.4	174.1	159.6	200.3	174.1	102.7	175.6	136	174.1	153.7	152.7	84.5	129.4	117.4	80.1	187.6	140.1	85.8	157.2	118.1	116.8	159.2	93.1	141.7	70.2	109.4	155.3	125	129.5	144.2	217.7	83.3	77.3	58.1	99.7	111	100.9	148.6	195.8	135.4	113.2	122.5	138.8
F2DZ78	26.3	25.5	30.6			12.4	15.7								8.4	13.2	18.5	110.8	104.2	94.7									30.8	30.6	25.3	64	100.8	80.2				135.8	183	147.5	65.8	71.5	63.7	68.2	93.1	82.1	12.5	14.1	24.2
F2DGM9	98.1	149.9	139.9	53.9	48.9	140	199.8	73.3	97	44.5	46.4	50.3	54.1	76.7	41.7	92.9	85	59.3	54.1	53.1	240.8	106.8	188.2	251.2	146.4	221	84.7	79.3	143.7	92.8	113.3	67.8	85.9	63.3	75.3	99	70.9	96	119.6	100.9	71.9	74.5	56.8	186	152.9	163.9	252.5	181.6	154.1
A0A287FYT8
F2CRN3	108.7	148.7	87.8	163.4	139.2	75.8	127.8	99.6	144.7	153.5	125.5	140.1	105.1	110.2	146.5	135.4	114.9	76.8	127.8	103.6	177	140.3	193.3	60	80.1	86.3	60.1	93.9	74.8	110.9	106.3	108.5	146.7	88.8	127.1	175.4	164.6	171.4	119.6	160.1	81	107.4	133.5	82.6	104.1	82.8	60.7	77.7	86.1
A0A287GNC1	74.1	66.7	80	41.6	38.2	75.5	79.2	23.7	21.3	35	25.7	59	52.9	55.5	20.2	31.6	36.5	52.5	70.3	42	156	143.7	90.4	110.8	92.5	87.9	73.8	78.1	111.7	101.7	91.3	70.1	53.3	65.9	24.6	39.2	29.5	178.4	139.8	110.6	96.8	110.3	87.5	173.6	165.5	129.4	195.5	107.7	110.5
M0X4B4	77.9	57.5	60.3	305.7	238	211.8	219.4	30.2	20.1	82.1	84.9				43.5	38.3	37.1	42.2	46.3	38.6	172	243.4	186						74.5	52.2	67.6	250.4	183	487.5	170.5	456.6	108.4	71.1	63.2	63.2	128.4	122.6	79	23.8	21.5	22.9	486	269.3	304.7
F2CQF4	256.9	131.4	170.3	93.5	94.4	25.2	23.6	216.1	87.2	10.6	37.9	394.7	182	95.3	31	26	77.1	39.6	147.3	124.5	103.8	155.7	137.9	10.9	10.9	13.3	158.7	126.9	90.6	84.5	145.5	266.9	235.1	165.5	31	83.8	99.3	124.3	132.5	154.6	129.1	106.4	175.4	29.1	24.6	40.3	46.5	52.1	100.8
Q7DM44	160.3	112.8	172.1	87.9	78.2	86.9	50.1	19.8	15.2			63	63.6	42.8	46.6	53.2	55.7	66.2	47.3	66.5	279.1	70	158.1	243.3	253.5	216.3	50.8	70.5	112.7	81	74.7	81.3	29	17.7	31.1	37.4	46.7	126	179.1	267.8	86.2	108.5	84.2	124.8	102.4	93.4	317.6	126.8	100.7
A0A287RWW3	174.3	91.2	184.8	288.5	301.9							166.5	140	143.2	284.7	272.6	324.5				269.7	204.6	241.8				141.5	125.5				116.8	216.4	125	269.3	299	239.9	218.4	95.2	147.8	91.9	104.7	100.2				337.1	182.1	257.8
F2CR28	57.1	99.9	63	52	104	94.3	110.4	85.9	171.5	133	126.7	163.9	161.8	146.3	162.6	121.3	148.5	93.6	112.5	95	80.9	76.6	129.3	70.1	97.1	123	107.2	140.5	106.1	50.2	106.3	82.9	108.2	92.2	108.7	65.7	61.6	120.9	112.3	65.3	54.1	73.5	112.4	102.8	108.6	121.3	57.8	74	162
Q5D5Z6	25.8	19.4	18.9							23	21.4				20.3	23.4	27.6	7.1	7	9.2	26.3	20.2	38.7	14.8	19.2	19.8	18.4	20.1							12.2	22.2	13.7	58.9	42.4	42.1	34	42.5	32.9	52.1	43.1	55.3
F2CXD7	115.6	82	86.6	53.5	60.8	48.1	33.6	124.1	91.3	63.9	68.7	61.6	55.8	43.4	25.4	17.8	29.8	13.1	35.4	24.8	72.9	66	74.9	42	53.6	42.3	68.3	64.4	44.5	55.9	127	95.3	124.7	103.8	77	55.2	81.7	143.8	100.8	173.5	90.2	143.7	99.1	106.1	87.5	104.6	85.7	52.6	109
F2EIJ3				176.3	180.7													378.2	233.9	388	79.3	71.4	97						249.5	275.9	263.6				194.5	239	206.3							373.1	373.1	304.3
A0A287JSY9	105.2	121.3	146	96.1	117	78	106.4	134.7	146.7	82.4	78.2	88.8	71.4	52.1	94.8	94.6	102	164.2	135.6	148.1	79.7	197.4	198.6	69.2	132.8	67.7	174.3	115.4	80.7	178.1	125.3	81.3	166.6	158.4	48.4	40.4	40.1	183.9	124.4	133.9	148.6	128.5	163.9	109.5	92.1	106.3	41	37.5	45.9
A0A287TF25	132.2	42.6	244.3	112.4	32.6	102.1	30.8	119	97	37	62.6	19.8	129.3	91.1	30.1	88	37.3	95.5	75.9	95	260.8	76.9	25.6	167.3	72.8	143.8	113	78.1	93	86.7	124.3	117.1	26.4	59	110.7	75.7	104	22.8	104.7	121.2	147	132	31.4	101.3	18	98.6	213	204.8	43.1
M0VKT2	134.1	130.6	142.4	68.3	53.9	111.1	74	44.9	47.8	28.5	28.1	45	37.2	40.5	16.4	19	21.2	68.7	86.5	96.1	134.4	147.8	111.5	112.4	112.3	98.8	120.3	112.5	292.6	180.2	315.1	127.5	105.3	143.2	82.6	102.3	117.3	149.3	193.1	156.6	109.4	76.6	103	248.6	181.1	157.2	259.7	227.4	290.4
A0A287LZW0	220.3	37.4	258.8	67.8	22.5	113.7	55.7	18.2	22.5			9.1	63.3	34.2	14	19.4	11.8	162.4	20.6	54.5	259.3	34.4	117.4	123	14.3	111.7	62.4	71.9	69.6	31.4	158.4	220	130.4	33.4	78.8	43.9	83.3	197.3	128.3	200.3	104.7	154.1	100.2	135.7	100.8	72.3	388.2	189.7	40.1
A0A287PW00	178.8	163.2	78.3	96.7	99.6	83.3	91.8	142.1	112.1	39.4	36.1	206.7	133.6	143.4	110.9	99.9	88.6	123.2	134.2	135.7	53	48.4	40	49.8	42.6	60.5	88.9	78	85.8	101.4	98.3	119.3	129.7	137.3	36.7	32.3	27.9	105.4	174.8	133.5	69.1	87.7	46.1	85	90.8	76.1	84.2	47.2	114.9
A0A287W543	117.4	167.1	138.7	77.7	75.4	120.1	105.3	46.3	125.1	73.6	59.3	37.4	51.2	48.4				63.3	58.8	57.2	134.1	61.3	116.7	70	102.5	138.9	73.5	69.8				150.9	114.8	87.9	79.6	104.4	76.5	47.2	40.6	64.3	176.2	129.9	116.9	148.9	144.9	122.7	136.8	118.2	124.2
F2D7S5	124.4	139	122.1	75.8	95.5	47.2	46.8	137.6	143.5	48.5	24	161.1	89	162.9	36.3	38.3	39.9	101.7	102.5	57.8	38.2	34.8	47.1	52.6	63.5	43.1	61.5	72.2	100.1	79.1	136	90.7	91.2	59	72.8	46.3	81.3	95.8	116.7	118.6	105.9	142.4	161.9	70	84.6	111.1	92.8	60.5	104.6
F2DC47	74.3	34.3	62.5	30.6	28.1	268	229.4	94.6	251.2	6.5	14.9	96.9	173.1	187.2	30.3	33	32.4	149.6	148.3	97.1	70.6	63.3	48.4	38.6	36.7	47.3			85	78.5	109.6	114.1	57.1	93.8	48.5	45.5	41.1	208	78.5	107.3	47.4	27.6	24.5	69.3	121.8	111.6	64.5	61.8	38.5
A0A287MS07	167.8	237.3	188.7	147.2	167.7	138	155.6	208.3	160.4	160	103.8	192.4	121	149.4	83.5	132.9	89.4	77.2	91	99	50.9	53.3	37.9	80.6	127.5	127.6	105.7	104.2	114.8	121.7	99.9	105	111.3	96.4	90.8	58.8	88.5	98.5	129.7	83.7	104.9	102.5	114.3	110	95.9	85.3	101.5	94.1	152.1
F2EFA8	184.6	57.4	242.6	81.7	30	255	63.5	63	53.2	43.7	82.3	34.3	46.9	90.4	46.3	83.4	10	85	23.1	81	223.8	77.1	27.5	268	78.6	244.7	99	42.5	159.8	86.7	245.2	235.3	31.5	48	87.1	142.4	110.8	121.8	145.3	162.6	101.5	85.3	8.3	301.3	42.4	213.2	373.1	196.8	71.5
F2DEL5	151.6	141.5	113.5	3.1	3.5	100.3	112.9	9.3	7.2			98	121.9	86.1				44.8	72.4	65.9	22.7	31.9	25.7	23	25	22.6	32.1	23.9	56.6	43.4	74.6	96.9	87.6	97.8	18.1	17.1	32.1	98.4	126.4	87.9	123.9	113.7	119.6	84.1	109.2	96.6	146.4	99.7	130.8
A0A287FPH8	123.1	134.9	63.6	66	126.3	90.6	80.8	59.3	173.2	94.6	88.7	141.2	134.1	158.3	230	124.5	148.2	115	114.4	82.6	126.2	77.7	98.9	19.2	86.6	104.9	83.1	137.6	49.7	49.2	60.1	55.9	97.1	83	115.9	118.4	95.3	62.4	64.9	67.1	121	75.5	134.5	93	99.9	111.3	107.3	66.7	94.8
F2DHV6	101.9	74.4	60.7	80.6	64.1	57.9	63	69.9	106.1	117.1	89.6	90.8	79.6	105.3	118.4	121.2	97.5	94.4	85.9	44	63.9	64.9	80.7	56.4	67	88.5	58.5	99.3	60.8	73	102.2	110.2	98	117.6	82	82.5	74.1	80.7	141.7	104.6	83.1	132.6	80.5	70.4	98.3	89.1	62.9	92.2	145.6
F2CY78																																															363.6	438	367.6
A0A287LT80	186.9	159.5	134.8	84.9	107.5	6.2	62.8	24.5	48	68.5	70.4	130.5	142.3	130.7	80.7	77.5	112.2	56.9	57.6	63.6	75.1	77.1	94.2	83.2	110.8	90.5	6	47.9	80.9	56.8	68.3	85.8	92.5	98.7	92.9	67	86.2	131.7	100.8	73.6	61.5	50.1	59.7	89.2	113.1	71.1	86.3	93.4	110
A0A287Q5P4	54.9	56.4	62.6	111.7	131.4			201.5	188.5	73.5	87.2	38.3	62.3	52.3				49.2	54.9	70.3	90	54.5	76.5				335.3	349.6	281.7	265.8	291.3	95.7	234.6	83.5	50.6	148.6	182	82.2	96.4	88.8	54.9	82	79.7	134.7	58	61.1
A1E9S0	86	92.7	193.1	76.6	76.8			75.2	68.9	52.3	84	67.5	21.7	119.7				135.9	130.3	121.6	628.8	609.8	785.3	521.3	72.3	338.9	135.7	73.1	200.7	127.7	106.6				155	141.3	125.4	136	126.2	102.9							462.3	145	407.1
A0A287PMW3	90.7	104.1	103	91.6	68.5	65.5	60.6	134.6	78.7	90.1	67.3	92.7	82.7	79	147.8	80.3	106.9	74.5	69.6	73.2	182.5	103	168.9	88.4	132.1	124	77.4	111.1	131.7	114.2	112.6	103.3	103.8	103.7	99.5	131.9	89.9	117.7	137.2	127.7	58.2	109.8	116.4	152.8	110.8	106.5	233.6	150.2	110.9
M0WSH7	45.9	70	68.6	129.1	120.2	52.9	47.3	84.8	118.9	88.1	95.7	129.4	139.8	98.5	218.5	115.8	180.4	56.6	22	22.7	76.3	71.3	120.8	63.4	111.8	69.9	44.3	105.6	17.9	45.1	32.9	52.8	79.1	65.2	113.9	164.5	86.7	95.1	29.3	66.5	65	78.2	109.2	47.8	48.3	29.7	112.3	121.6	170.2
Q42848	111.9	109.1	87.4	164.4	39.9	41.5	35.3	103.2	85.1	112.9	186.9	69.3	49	32.1	65.9	42.2	50.2	40.4	42.8	35.2	26.9	55.8	31.7	20.3	42	30.3	44.8	34	48.9	115.6	118.5	27.4	57	64.6	29.3	51.6	70.9	62.6	72.5	101.6	111.9	63.3	39	42.3	51.6	36.1	47.4	87.7	74.6
A0A218LNH5	136.4	257.3	202.2	205.9	204.9	68.5	233.8	189	148.6	189	144.2	70.5	105.9	128.7	122.7	85.9	146.2	21.7	21.9	19.6	107.9	45.1	70.6	43	25	26	179.4	174.5	158.7	88.2	157.9	111.2	43.5	75.5	112.6	96.1	111.7	51.7	37.7	68.4	88.8	83.4	83.9	73	77.1	71.4	174.7	114.3	65.9
F2CUI8	104.1	84.4	160.6	52.7	46.4	67.3	69.5	28.7	34.6	16.9	15.7	16.6	28.7	42.3	36.8	63.5	62.9	81.7	108.8	184.1	244.8	226.3	293.3	458.4	332	241.4	32.3	30.7	132.4	93.3	151.2	143	112.8	104.1	97.6	122.3	184.2	142.4	118.1	112.7	108.7	87.3	60.5	201	162.7	157.1	256	173.1	138.6
F2D4R8	158.6	152.1	176.7	130.6	65.6	70.3	37.4	197.5	112.4	41.2	33.9	248.7	119.7	153.8	78.2	38.9	68.5	88.3	137.4	139.2	79	106.2	86.2	45.4	38.1	42.2	168.3	114.9	52.1	140.1	188.6	126.6	108.9	163.2	71	48.3	75.2	113.5	61.8	94.6	129.7	117.5	117.6	45.2	68.8	47.6	70.3	98.4	87.2
F2DA85	124.1	143.2	131.5	112.2	90.5	155.8	146.6	133	128.6	105.9	116	170.9	99.6	130	89	153.3	106.4	111.2	141.7	118.3	93.7	108	73.1	63.2	93.4	80.5	122.5	133.5	146.1	95.2	84.4	126.7	135.4	169.7	70.8	102.4	83.6	120.6	108.3	128.9	110.7	96.2	93.2	112.3	164.1	117.9	53.1	95.3	120.9
A0A287UZC6
F2E397	49.5	30.9	33.9	17.5	16.2	28.2	26.7								18.6	18.2	10.2	33.2	44.2	42	267.8	291.5	266.2	129.4	123.1	126.7			118.8	137	154.5	105.4	143	105	47.4	37.6	51.9	67.3	59.4	72.2	105.3	84.3	80	117.5	112.6	119	185.8	154.9	137.8
F2CPW2	119.1	96.2	90.4	95.7	88.2	142.7	157.2	73	105	55.9	59.2	116.2	109.5	116.1	66.9	88.1	75.8	45.1	47.3	58.6	257.4	134.2	134.7	109.5	114.9	103.7	58.9	61.7	170.3	146.2	186.5	139.1	164	158.8	100.5	139.6	115	81.9	97.8	55.2	108.1	100.4	90.8	118.4	83.8	88.2	223.3	157.7	223.3
F2DZN3	158.2	180.1	162.7	129.9	181.2	133.3	134.1	44.1	33.7	69.4	76.7	146.9	114.5	129.4	137.5	161	142.5	201.7	162.7	190.6	129.5	152.2	146.9	20.8	22.6	50.3	42.7	48	101.7	114	108.1	109	155.5	170.9	124.2	153.9	165.5	98.5	137.2	129.2	143.8	133.7	103.9	116.2	124.5	129	99.3	88.6	117.2
A0A287E4J1	156.4	116.8	107.1	70.7	117.1	113.8	148.6	48	99.5	94.5	113.8	107.2	143.9	130.8	73.3	103.2	136.9	38.7	54	39.8	92.9	124.3	95.3	124.9	115.6	148.6	139.4	116	70.3	59.9	77.8	99.5	121.1	117.8	81.7	68.4	36.7	163	279.9	140.1	148.1	297.5	126.8	197.1	156.8	158.1	181.3	93.1	262.7
A0A287RZ89	37.3	64.7	35.5	37.3	38.5			45.5	67	111.7	92.8	65.5	47.2	66.4	91.1	126.8	84.1	76.9	62.3	74.2	73.9	56.9	74.7	55.5	67	64.2	32.4	66	45.4	39	53.5	50.4	65.3	67.8	67.4	62.9	43.1	146.7	102.8	68.9	106	95.8	122.3	20.2	41.3	31	45.8	50.1	93.1
A0A287ED16	206	89	158	116.4	86.2	143.9	115.8	55.3	50.1	85	80.4	54.4	64.7	143.9	31.6	105.5	25.7	114.8	57.1	82.5	241.6	83.2	47	168.7	86.2	213.5	146	89.1	205	72.9	223.2	162	41.6	62.4	125.2	119.5	119.3	26.8	122.8	120.5	82.9	98.9	38	216.8	30.2	167.8	288.1	131.4	74.2
A0A287GCP2	78.6	109.5	51.5	56.1	71.4			122.3	136.9	87.2	103.3	64.2	97.6	80.8	201.8	132	116.2	63.1	77.8	74.6	49.5	63.8	72.9	48.7	64.2	41.3	64.9	80.4	36.3	32.9	26.5	59	53.7	41.2	107.6	211.2	155.3	149.2	123.1	168.1	109.4	68.1	146.5				91.9	89.7	113.2
A0A287WVK2	129.8	102.7	59.5	115.5	65.1	43.2	63.7	166.1	89.3	78	133	85.5	111.8	93.7	186.7	156.1	118.4	48.9	55.4	52.2	75.9	83.5	92.8	31.3	30.5	32.3	56.6	52.2	21.5	24.6	16.7	155.7	112.5	248.5	91.4	63	68.4	110.9	182	152.2	63.5	45.4	70.1	23	86.7	42.3	29.1	50.3	57.1
F2DZF2	72.4	62.1	67.2	117	115.5	59.3	53.7	35.7	43.4	72	64.8	63.2	37.3	47.2	52.6	67.9	56.8	90.7	130.6	121	129.2	144.8	151	39.6	47.4	30.6	58.4	42.2	106.6	83.2	89.8	109.8	113.9	125.8	81.1	87.8	125	89.5	67.5	100.4	100.8	121.3	157.5	84.8	168.3	109.5	44.6	34.6	79.5
A0A287R0T2	214.9	170.3	98.7	136.6	118.5	210.5	234.9	241.1	263.4	62.8	70.6	71.7	65.6	78.6				98	66.2	72.5	147.8	200.4	254	161.2	83.6	94.2	162	193.2	152.4	152.6	144.4	114.3	79.5	91.7	59.4	52.6	204.9	126.7	97.5	153.1	173.8	150.2	138.3	186.6	136.3	158	145.6	84.5	79.8
P12940
F2DNM7	126.4	183.8	133	103.6	143.9	187.4	199.7	156	122.3	126	124.6	149.5	137.7	124.6	98.9	115.1	109.6	134.6	211.6	204.9	137.7	158.4	164.5	175.4	243.4	173.1	242.6	179.3	121.1	247.4	61.3	87.6	163.2	115.6	118.3	123.8	113.1	260.1	202.7	137.6	84.8	75.6	111.9	133.3	193.3	133.7	73	84.8	137
A0A287ILT4
F2E4X0	108.3	67.3	89	153.2	185			112.8	77.7	51.8	57	149.7	92.7	105	46.1	43.5	45.7	83.3	185.3	84.8	85.2	114.9	126.5	30.6	27.6	30.2	64.3	115.8	16.4	30.8	36.1	69	158.9	80.6	36.6	40	30.1	145.2	105.4	91	139.2	146.9	139.3	19.6	25.9	22.5	55.5	97.9	75.1
F2DDC0	83.4	74.9	87.6	77	71.6	133.3	111.1	108.5	68.8	32.8	27.8	92.6	58.3	84.3	28	29.4	17.5	60.3	58.6	51.6	144	185.8	153.5	113	80.2	78.9	65.8	67	106.6	118.8	83	90.9	105.2	107.2	42.8	101.5	70.4	77.5	72.1	93.1	146.2	127.5	154.4	75.9	110.8	72.8	77.9	139.9	88.8
A0A287XAB9	104.5	111.5	119.9	69.7	81.3	19.9	24.5	138	119.3	143.7	142.3	93.9	83.6	92.3	64.6	58.6	72.2	23.1	27.6	33.9	107.4	132.1	153.4				112	115.7	96.1	77.6	89.5	90.6	98.6	81.7	189.3	243.5	210.4	57.3	54.4	61.3	104	79.5	116.2	48.5	48.2	52.5	49.4	125.8	90.8
M0Z828				11.5	8.9	82	65.1	18.8	20.7			66.1	92.3	60.6	28.4	32.6	44.1	33.3	37.3	36.7	44	23.4	39.9						42.6	28.6	25.9				37	34.9	37.4	155.1	92.8	114.7	87.1	69.5	59.3	34.3	27.2	46.1	105.9	102.7	80.8
A0A287SR19	79.3	93.2	32.3	54.1	112.4	30.2	182.3	203.2	170.9	187.2	116.9	26.4	81.7	121.9	85.9	82.7	91.3	122.8	139.2	140	202.3	86	56.8	127.3	122.8	77.6	47.9	118.9	106.8	26.7	133.8	77.5	29.4	31.8	91.6	100.4	105.1	232.1	76.2	33.2	123.2	91.7	189.3	42.6	40.8	47.1	118.9	118.1	60.2
F2D1G5	165.1	158.2	124.7	140.1	126	98.3	75.7	201	160.6	62.3	103.4	237.3	133.3	74.1	96.8	105.6	114.2	86.3	112.9	82.8	51.5	105.9	69.5	39.5	58.3	104.5	96.9	161	65.2	149	123.7	124.7	132.2	166.9	78.1	99.7	67.1	103	154.7	106.1	96.8	70.3	64.4	83.2	97.8	100.8	75	97.7	110.3
A0A287L785	108.5	86.7	138.7																		434.9	433.2	481.1	213.5	181	152.8									90.2	142.7	93.9				56.4	61.1	57.5	141.2	82.5	123.8	181.1	204.4	126.6
A0A287KD19	197.1	216.9	405.4																		335.4	344.3	338.1
A0A287F007	73.3	88.1	168.6	82.3	88.9	172.6	89	194.4	208.2	58.8	103.3	278.1	122.5	152.5	71.7	52.3	75.4	114.8	112.3	196	58.2	169.9	200.7	43.7	105.7	40.1	136.2	126.7	147.8	219.1	83.9	135	169.6	283.3	68.9	74.6	87.6	156.6	77.6	105.2	122.5	71.9	161.6	86	133.5	73.2	98.5	71.5	67.1
F2CPP0	112.7	93.1	113	54.9	89.1	87.3	105.3	77.3	67.6	58.7	58.5	69.5	89.4	92.3	160.4	94.8	72	111.8	55.1	70.2	235.1	152.9	269.3	198.5	86.5	143.5	55.9	70.3	169.3	105.9	127	79.1	40.7	39.9	117.1	126.9	73.7	174.5	54.2	80.7	82.6	88	77.2	128.6	81.3	96.8	199.2	146.1	76.6
M0VY36				57	60.3	53.1	62.6														75.2	40.9	78.4	42.8	45.6	41.8	80.3	80.1	83.3	128.7	115.8	78.9	110.7	204.3	44.1	43.3	44.2	29.5	30.9	36.3	140.8	132.9	98.4	103.7	115.7	144.6	168.6	115.5	178.6
F2E785	53.3	145.1	81.9	44.9	60.2	23.6	13.6	110.6	109.1	62.3	63.8	86.9	121.9	131.1	153.5	118.4	93.7	129.1	113.5	79.9	58.2	45.5	52.4	41.8	53.4	63.6	98.7	133.1	66	72.4	49.4	80.1	57.9	83.1	45.8	46.4	48.6	73.7	128.3	40.9	75	117.2	97.9	57.1	106.2	37.4	41.9	54.5	93.4
A0A287LIV0	167.8	82.2	117.4	50	63.1	53.4	60.9	142.6	60.8	53.6	33.8	177.8	84.3	68.5	46.3	68.1	66	92.9	230.5	145.5	60.9	55.2	21.1	44.4	42.4	106.2	166.6	89.4	30.4	107.3	89.3	115.3	77.3	123.6	37.8	39.3	51.9	188.6	182.5	115.2	123	179.2	65.9	59.1	104.8	96.2	57	46.5	115
F2CZW3	73.5	106.5	114.8	133	136	57.8	66.5			79.6	181	119.8	137.9	92.5	153.5	59.1	98.6	57.2	74.2	111	91.6	189.3	239.7	106.9	105.3	138.7			49.1	87.2	65	91.9	99.1	95.2	112.7	134.7	125	117	62.9	51.8	175	111.9	202.5	133.3	103.5	98.2
F2CQY9				21.6	26.1																10.1	15	7.3												27.3	32.1	31.3	243.3	189	173	96.7	84.2	32.7	49.7	76.6	29.6	19.6	10.3	14.6
A0A287RSX4	114.3	57.2	91.9	98.4	46.3	123.8	68.8	85.3	119.9	86.8	122.5	117	95.2	98.8	68.7	78.4	65.8	18.1	18.9	18.3	314.2	97.7	44.7	313.2	144.2	244.5	103.2	115.5	81.9	84.5	130.6	122.7	101.6	115.7	104.3	131	64.5	45.7	72.2	94.2	155.9	78	75.8	179	152.1	208.7	179.4	132	157.4
F2E8Q3	138.9	106.8	55.5			37.1	39											33.8	17.9	41.1	51.7	20.4	47.3				20.7	17.8	100.6	72.6	98.5	269.8	256	263.6	66	81.4	68.6	168.1	87.6	239.3	92.7	80.1	50	99.4	87.3	38.2	518.5	66.8	16.1
A0A287WV12	161.9	155	144.7	102	108.7	17.4	18	127.8	135.8	29.8	39.9	158.2	140.9	148.8	201.1	153.6	128.1	146.8	87.5	90.6	90.2	68.9	101.9	80.7	90.8	124.3	148.5	159	66.8	65.9	83.7	58	54.8	59.7	123.4	138.3	125.6	203.2	234.3	264.1	173.7	120.8	146.4	17.6	13.8	16.1	14.4	18.4	19.5
A0A287M875	45.3	63.2	65.6	56	58.1	33.1	28.7	64.6	64.9	30.8	47.6				23.4	18.6	15.5	94.6	92.8	94.3	255.5	127.8	143.6	164.2	107.4	97.7	99	113.7	62.3	83	70.9	58.8	66.8	56.1	90.5	121.5	71.6	45	32.7	43.6	128.2	82.8	61.3	82.9	84.6	82.3	99.1	77	75.5
F2E4E7	112.4	102	148			323.9	382.7											99.1	71.2	89.8	83.7	69	119.6				93.2	88.3	125.5	88.3	104.7																134.4	120.8	121.3
F2DDV8	41.8	263.4	101.1	100.9	249.2	67.5	170.2	145.3	209.9	236.7	202	77.5	232.3	213.3	208.8	291.3	245	206.8	45.7	71.6	179.1	77.9	145.8	173.2	223.6	209.4	59.3	210.1	262.5	79.9	143.9	37.9	43	62.3	186.4	115.7	83.5	116	49.6	50.6	68.3	41.8	213.1	28.5	101.8	49	36.4	41.8	63.1
A0A287SBF4	194.9	96.1	152.5	52.7	51.7	41.5	35.8	84.4	73.6	24.4	26.8	78.7	44.1	53.8	26.6	30.1	29.3	85.8	87.6	96.6	123.9	138.8	125.6	71.6	97.1	97	140.5	138.1	71	66	73.9	89.4	29.3	50.3	91.6	92.9	78	88.4	247.6	111.9	41	82.8	71	138.2	67.4	92.7	210.5	110.6	151.7
F2CXV4	120.9	177.2	83.8	102.9	140.7	173.1	147.5	173.2	192.3	181.7	149.6	147.8	193.6	156.6	105.5	191.4	191.9	130.3	98.1	75.4	59.3	73.4	63.5	85.7	143.1	130.4	131.8	166.9	155.5	167.7	119.6	95.1	84.2	144.1	122.2	94.8	88.1	44.8	95.7	66.6	57.1	98	64.7	103.3	132.9	90.5	114.3	154.3	210.7
F2D8K0	114	126.9	52.3	82.3	148	120.3	105.2	169.3	173.9	154.1	101.4	143.3	84.5	110.9	121	113	105.5	103	54.6	45.9	100.4	56.3	128.5	99.1	117.4	86.3	59.7	162.4	117.6	134.3	84	108.2	94.4	77.6	108.3	107.3	53.8	148.1	112.6	67.6	146	223.1	132.1	38.7	62	49.1	74.6	100.9	107.6
A0A287UZD1	61.5	53.3	65.2	62.6	70.5																47	43.6	38.8				37.5	61.6
P08772								577.7	528.7																		178.5	137.8				46.8	44.7	29.2													758.6	54.3	356.3
A0A287MC57	75.3	89.9	86.9	112.7	83.2	79.3	20.5	157.7	116.8	96.2	76.6	128.6	115	90.8	62.7	39.5	89.5	56.5	98.9	126.5	46.6	141.7	139.4	20.9	84.9	42.8	82.5	87.3	45.8	158.9	60.6	56.7	197	139.8	74.3	77.6	111.8	92.4	54.9	89.3	167.3	125.8	93	63.6	153.2	98.7	34.4	112.7	69.6
A0A287T476	17.8	13.7	16.1	9.9	11.4	49.7	37.2	408.7	50	20	23.5	10	16.2	21.4	13.7	3.8	11.8	20.2	23.4	18.3	1.2	1.5	1.4				154.4	69.7	19.1	128.3	14.6	49.7	9.4	85	30	31.4	25.7	15.1	16.8	21	5.6	6.6	7	17.7	54.9	19.6	724.6	421.9	343.4
A0A287LWN7	53.2	99.7	63.9	70.6	79.7	72.4	30.9	86.7	101.3	64.1	72.4	112.6	67.9	87.3	161.8	107.2	80.6	112.5	98.3	111.1	80.3	118.4	163.1	53	57.9	64	93	112	61.9	53.3	45.3	71.3	63.3	108.4	74.2	61.6	61.1	110	101.8	115.3	92.7	70.7	78.4	111.2	107.2	97.7	71.9	70.6	78.6
A0A2R9IRE8	77.4	65.2	67	25.5	29.5			81	79.4	54.5	50.7	88.5	121.9	135.9	87	63.6	51.4	49.2	51.4	46.4	102.4	69.1	47.8	95.1	75.7	62	38.4	40.4	487.6	139.3	117.9				364.2	378.2	156.8	49.2	77.5	45.3	37	40.5	48.4	264.3	238.2	172.9	55.8	69.2	58.8
A0A287HPE1	22.5	109.8	31	77	136	26.7	27.2	29.8	140.2	163.9	116.7	71.1	47.9	56.3	193.5	126.1	141.3	144.3	34.8	10	59.2	55.9	43.4	52.1	131.1	45.2	90.4	88.4	20.2	26.7	21	55	77.6	61.6	126.2	174.8	63.8	210.9	88.2	116.5	82.4	132.4	213	14.8	15.8	16.9	83.8	43.8	110.2
A0A287LL06	194.2	74.3	194.3	134.5	48.3	171.4	216	85	53.5	51.2	97.7	47.3	98.1	92.9	101.8	99.6	60.8	70.1	37.1	74.1	217.6	164.2	110.8	204.2	88.9	147.7	72	59.1	163.4	85.5	229.6	269.8	74.4	92	100.8	171.9	111.7	33.1	110.4	161.9	118	97.5	19.9	211.1	75.7	146.9	390	146.4	141.9
F2DMS9	264	278	348.3			57.4	55.3	32.8	36	54.6	52.4	46.4	36.1	59.4	86.9	106.9	70.7	42.5	60.4	55.4	281.9	259.8	264.3	243.5	227.9	168.2			175.3	175.7	234.4	116.7	103.5	114.2	74.1	63.9	55.2	111.9	126.1	134.8	118.9	86.8	121.3	180.5	134.3	175	240.9	121.3	210.3
A0A287QUE3	114.8	99.8	125.2	126.1	87.2	39.5	44.2	47.8	78.7	80	79.3	91.4	81.9	97	23.8	39.2	22	58.2	73.5	58.3	251.8	193.7	300.4	128.5	99.3	110.3	112.4	98.7	105.8	110.4	106.3	47.5	38.3	29.9	152.4	148.8	121.2	115.5	56.6	111.1	72.7	88	84.6	132.7	119.5	121.4	227.7	90	168.5
F2CVC1	93	39.2	77.4	41.9	40.2	56.2	32.4	43.4	31.3	43.6	15.4	54.1	60.7	68.8	92.6	59.5	40.8	54.4	39.1	97.2	175.4	148.2	242.4	81.9	25.6	58.7	60.5	17.2	39.6	58.7	54.7	109.6	59.4	69.5	41.4	94.5	55.6	163.9	77	78.1	131.9	61.3	53.9	72.8	119.2	92.4	142.1	170.7	79.8
A0A287MPY9	99.6	84.4	66.5	107.6	92	50.2	40.2	108.4	150.9	56.1	117.1	87	121.5	81.3	69.2	46.1	84	114.7	115.4	155.2	47.8	126.2	96.2	29.4	68.7	52.1	79.3	103.7	29.2	53	35.7	86.1	162	112	78.8	67.1	106.6	85.7	186.3	213.1	76.5	120	105.4	86	101.2	101	68.9	79.7	95.1
Q9M3N4
A0A287R0R3	67.2	61.5	43.1	98.1	104.4	139.2	80.3	142.2	107.2	73.3	44.4	180.8	94	137.1				38	63.5	74.6	112.3	88.7	121.2						62.3	66	52.3	105.7	165.2	79.6	192	145.6	95.2	61.4	70.3	65.7	107.1	115	126.3	183.9	251.4	194.5	111.6	86.7	177.2
F2EGQ9	106.6	89.7	135.1	45.7	35.8	192.6	178.6	85.5	96.3	31.8	39.8	154.9	100.5	75.8	27.8	25.2	32.1	36.6	69.9	48.4	198.6	117.1	74.6	109	42.4	67.5	65.9	32.3	27.6	25.7	44.9	195.1	261.6	201.6	67.3	57.4	51.3				77.3	39.8	27	252.4	160.4	144.9	93	120	77.2
F2ELE6																																															993.7	1016.8	893.6
A0A287Y2C2	63.6	55	75.2	58.8	73.4	151	61.4	35	62.5	14.1	42.1	72.5	58.3	73.4	76.5	111.6	85.1	117.2	96.6	98.2	258.8	131	131.3	264.2	155.7	247.1	149.3	102.1	146.7	49.5	112.6	154.7	121.4	164.3	99.5	174.8	116.1	93.8	86.8	123.8	84.3	63.3	82.2	197.5	220.7	200.8	312.5	195.7	213.3
F2CXU0	122.3	127.1	94	99.3	104.3	42.2	32	117.9	140.7	69.3	65.1	103.3	128.9	86.8	128.4	61.4	108.7	145.8	127.1	141.5	42.5	29.7	35.4	52.6	63.3	67	78.4	64.6	109.9	99	103.8	54.7	69.5	55.3	132	134.3	101.1	116	121.9	105	137.5	126.6	144	44.6	31.3	25	21.8	40	26.6
M0UM98	120.6	125	101.1	297.9	249.7	176	165.8					109.3	98	109.4	55.9	52.9	36.9				357.1	356.8	313	122.4	153.4	138.9	111.1	95.9				145.5	138.2	142.4	290.7	399.9	434.1	73.8	81.7	61	128.1	99.2	113	114.2	101.4	66.1	266.7	256.6	343.6
F2D6N2	85.8	92.4	133.5	126.3	106.6	329.5	308.8			229	236.5	192.1	224.7	176.6	356.3	210.4	246.2	103.7	64	93.5	247.5	211.5	229.9	43.4	68.6	50.9									81.2	93.7	70.1				94.3	113.1	107.2				50.8	46.9	51.9
A0A287QMC7	102.6	146.3	148.5	105	78	7.1	11.4	49	104.6	44.2	46.6	74.5	76.6	59	67.2	107.6	61.8	69.8	54.7	55.9	81	88.3	125.7	46.5	65.7	68.7	110.4	94.8	92	67.9	91.4	101.7	100.1	51.4	47.3	113.5	97.5	110.9	180.7	351.4	71.6	123.5	122.5	185.9	167.6	189	4	3.7	3.7
A0A287JEY2	43.5	49.5	80.2	49.1	52.6	55.6	70.8	67.3	43.9	62.6	75.4				54.2	37.6	23	40.7	24.7	26.6	238.3	149.8	144.3				35.5	41.3	37.4	32.1	31.6	35.1	27.7	17	154.1	151.5	137.1	63	112.2	36.3	99	81.3	81.2	86.1	108.6	109.4	119.1	99.7	106.7
A0A287VV58	85.1	169.6	73.7	132.8	141.1	65	173.9	67.9	137.6	128.3	102.7	83.4	108.6	102.1	162.3	113.7	95.3	106.5	78.5	72.5	187.1	100.8	104.9	96.9	88.8	118.3	77	121.9	87.3	54.4	58.9	75.8	61.9	71.9	98.4	100.5	74.1	84.9	124.6	57	73.8	108.9	112.5	62	71.8	81.9	84.2	66.2	96.9
A0A287I4A9	27.4	35.9	41.3	36.4	30.5			20	19.8			22.1	29.6	23	36.1	38.8	36	82.8	72	61	55.9	28.4	25.2	37.6	14.8	46	39.4	28.1	25.2	20.2	18.7	30.5	20.7	44.2	36	71.3	45	57.4	55.8	51	46.5	57.1	32.5	27.3	26.5	21.4	37.7	28.3	36
F2E5E5	72.6	141.8	69	90.9	121.2	101.2	84.7	144.5	135	169.6	112.6	103.1	122.1	127.8	127.5	168.7	132.5	86	82.1	72.3	62.3	104.5	73.7	120	110.8	122.3	118.5	156.2	75.4	167.7	114.7	78.1	82.2	96.6	97.3	88.5	76.5	72.3	139.1	60.2	91.5	132.6	100	77.1	93.6	84.4	133.8	94.8	177.8
F2CZ65	161.7	107.4	46.3	80.1	86.5	78.5	127.7	80.3	91.1	91.2	99.8	153.1	62.5	70.3	33.9	40	56.7	79.6	165.1	78.3	59.3	46.7	33.9	57	91.2	48.4	85.4	88.8	106.6	227.4	249.2	167.7	176.4	96.8	56.6	71.5	49.6	66	109.1	129.2	127.3	227	170	91.4	98.7	109	150.5	106.8	157.5
A0A287U4Y9	156.4	67.6	75.3	100.6	87.8	121.5	156.2	107.2	160.5	165.4	233.5	106.5	197.1	150.5	98.5	90.2	142.3	99	66.1	116.2	93.3	212.4	73.8	83.9	141.5	98	62.3	121.2	113.3	143.5	171.5	80.3	85.4	90.8	125.3	40.1	125.4	52	58.6	90.9	80.4	145.7	53.3	207.4	113.8	160	124	112.6	150.1
F2CQ36	126.3	135.3	125.3	37.2	79.4	52.1	17.6	34.5	65.9	54.8	49.9	114.9	131.9	131.2	119.3	142.6	93.7	165.8	188.9	141	108.6	72.7	129.3	50.4	51.2	103.4	124.8	166.4	23.6	60.9	54	104.4	80.8	83.1	71.2	77.3	77.9	59.8	183.6	39.4	71.4	71	49	32.9	38.6	60.7	50.1	60.9	81.7
A0A287SCF2	169.2	120.5	176.4	118.9	118.2	49.1	49.9	78.7	88	73.1	78.8	49.4	47	63.4	20.9	23.4	28.2	118	119.8	70	99.6	79.6	101.5	39.8	45.3	32.4	68.3	75.8	62.5	80.5	95.4	46	70.9	64.8	194.3	193.8	189.4	149.9	93.5	128.4	102.3	89.3	110.8				63.3	83.2	24.9
A8CCK8	88.2	95.4	73.4	50.7	68	99.5	84.5	117.5	108.2	61.6	54	81.6	45	79.1	56.9	100.4	56.7	76.4	96.6	54.4	87.3	44.6	103.5	63.5	50.6	80.8	124.9	144.2	45	51.3	66.4	125.2	123.3	106.1	70.9	25.8	45.3	72.3	160.4	96.7	62.7	81.3	37.4	80.7	73.2	87.2	112.1	95.5	148.9
A0A287MYU3	177.4	112.4	63.4	63.4	114.8	262.6	338	100.7	102.3	164.4	73.5	135.6	84.9	74	82.3	49	110.1	73.7	104.1	84.7	72.3	83.5	74.2	45.8	107.8	112.4	121.9	71.3	167.6	226.3	296.8	218.1	88.4	167.1	53.9	49.7	45	45.9	94.3	100	120.3	99.9	64.7	299.6	121.7	182.3	294.3	234.2	107.5
A0A287HTR4	80.4	88.6	71.7	57.5	45.1							23.9	27.4	35.7	42.6	40.8	40.7	52.3	18.3	28.6	37.7	44	44.1	34.8	22	27.2	29.2	19.3				22.9	17.1	34.8	34.4	41.2	35.2	57.1	45.6	54.8	37.7	43.7	53.5	69.4	64.4	55.3	29.9	31.7	27.6
A0A287KC10	124.3	120.5	121.9																		283.3	368.7	216.9	87.6	54.5	88.7			114.4	103.2	105.1	168.7	264.2	182				107.2	145.8	112.7				277.4	221.8	237	287.1	198.1	172
F2DFW6	85.8	135.3	103.9	119.9	191			201.9	225.9	46.6	44	199.6	195.8	186.6	131.2	118.1	113.3	143.4	122.5	147.9				58.7	65.3	71.2	160.2	179.2	61.9	70	59.6	137.8	159.3	165.7				155.4	117.5	123.9	45.2	60	52.6	104.6	101.8	88.7
A0A287Q4P7	100.3	97.6	96.4	310.9	227.5	122.1	172.6	31.3	39.8	166.6	205.5	87.1	84.4	85.2	109.4	91.8	88.4	111.7	124.6	157.1	136.3	187.8	128.6	68.3	73.9	54.4			124.3	110.4	120	112.4	93.1	77.3	160.1	233.5	220.5	120	103.1	105.3	108	104.4	133.1	43.9	46.1	40.9	114.8	109.1	129.3
F2CUZ1	196.5	25.5	197.8	213.8	240.2	248.9	298.6	77.3	26.5	9	43.8	45.2	58.9	23	29.8	25.2	29.8	25.9	47.6	113.9	110	165.1	196.9	147.8	24.1	115.9	122.8	15.8	54.5	86.3	235.8	255.3	59.8	93.1	38	68.8	265.7	19.9	100.3	280	162.3	149.7	113.2	401.9	62.1	261.2	325.5	255.4	284.2
A0A287G758				195.3	207.7			137.2	153.4									133.4	110.2	91.5	162.3	86.8	121.8	78.1	97.6	95.1	124.2	122.3				157.8	134.6	213.7	107.1	85.5	115.9				135.2	138.9	154.6
A0A287J6P3	91.9	113.9	71.3	128.8	127.1	93.8	155.6	95.9	127.2	124.7	91.4	90.2	110.4	123.2	106.3	111.9	123.7	112	144.4	85.1	76	68.3	87.8	78.9	66.5	62.9	91.9	122.1	97.4	92.4	97.5	65.4	99.4	97.9	87	92.4	89.1	95.3	110.9	107.5	102.6	159.6	148.8	94	115.9	80.7	110.6	92.9	151.7
A0A287QQN0	95.9	127.8	69.2	126.3	126.4	195.8	137.8	148.6	183.9	136.1	157.1	153.7	97.1	150.4	116.2	113.6	121.6	106.7	106.5	164.7	38.5	122.4	151.8	74.3	119.4	50.7	125.4	76.7	108.4	112.5	64.1	176.1	210.9	210.4	129.3	128.7	158	106.1	40.6	124.8	149	85.4	149.5	60.7	244.8	94.4	38.3	126.6	66.8
A0A4Y5SG41	138.3	208.6	148.9	148	148.1	49.6	56.7	118.5	129.5	159.9	155.8	55.8	76.6	19.3	72.4	101.2	125.9	189.2	275	222.7	67.3	150.2	55.2	67.8	155.5	119.5	167.9	186	99.6	125.9	83.6	125.3	114.6	182.7	57.2	71.1	65.3	127.8	106	158.5	120.1	90.2	125	45.4	44	59.4	111.5	160.1	161.4
F2D074	27.5	44.6	40.5	34.3	33.7	63.1	71.3	30.5	30	44.2	38.6	50	49.3	49.4	36.8	37.8	49	22.3	18.6	16.7	94	52.2	41.5	109.7	94.2	131.2	149.9	106	73.1	87.6	101.8	135.7	125.8	131	78.5	80.4	67.2	97.1	62	100.4	73	65.1	68.5	112.3	146	122.3	99.5	105	56.4
F2E1R5	53.5	71.2	35.1	21.3	27.6	77.6	83.7	112.5	116.5	39.8	40.3	145.1	120.5	131.8	133.9	139.9	151.1	105.5	95.9	81.2	59.2	45.5	56.3	96.4	91.9	89.2	130.4	131.3	119.5	159.8	118.1	89	80.3	96.9				156.1	154.3	115.8	128.1	133.8	120.6	86.3	107.5	102.6	140.7	181	153.4
F2EFR1	92.8	64.3	93.7	93.1	80	111.5	136.8	99.6	96	82.6	80.3	79.7	86.7	96.1	100.4	117	94.1	88.2	139.8	136.8	69.3	105	62.2	86.2	76.6	102.8	86.6	121.7	120.6	101	106.9	107.5	90.4	66.6	64.6	72.1	79.1	52.8	63.1	102.6	118.3	118	79.8	70	107.6	119	195.2	215.5	63.7
A0A287LG24	71.3	173.3	119.9	101.3	111.3	78.8	133.8	73.4	205.6	212.4	126.5	96.2	230	215	156.3	268.4	216.7	157.2	83.3	53.3	114.2	71.5	60.4	182.2	181.4	200.1	55	214.6	150	71.8	55.9	88.4	59.1	101	154.4	128.1	90.7	81.8	171.6	43.2	72	65.2	87.7	91	91.5	68.9	137.2	56.3	188.7
F2CRA1	128	120.2	94.9	49.5	49.2	102.3	99	102.4	122.6	35.2	26.7	128.5	93	104.6	129.6	123	157.2	72.5	105.6	99.7	33	58.7	63.1	23.4	19.6	20.3	18.9	21	95.1	77.3	82.2	233.3	209.6	224.6	73.8	63.9	78.9	29.9	36.2	30.5	28.6	26	33.5	49.8	56.7	59.5	78	78	71.6
A0A287PF49	985.4	1063.9	1110.8																																890.1	2310	1975.1										768	757.4	842.8
F2D1I2	101.2	143.1	105.1	29.2	28.1	82.7	212.9	80.7	71.1						25	27.5	30.3	128.3	310.6	173.3				35.5	36.9	32	98.2	81.7	47.8	49.7	41.2	168.2	199.6	245.1	18.1	32.3	21.6	378.2	191.3	273.3				88.4	88.4	105.3
A0A287IX56	68.5	88.3	76.7	28.2	34.3	91.6	108.4	228	186.7	138.5	132.2	132.7	152.3	135	135.2	113.7	164.1	64.5	80.2	86.7	38.8	62.3	45.7	77.5	137.5	83.7	160.3	173.4	52.7	90.3	49	101.7	150.2	129.5	90.9	92.4	93.5	99.3	39.9	20	73.3	67.3	60.7	62.2	120.5	65	38.8	49.6	48.1
A0A287KPM8	62.9	44.2	39												23.1	35.3	46.5	26.5	29.5	30.3
F2CSV3	144.8	146.2	144.3	263.2	222.1	23	22.5	92.7	93.8	94.7	50	42.2	120.6	77.1	91.7	83.5	109.1	88.7	52.4	100.7	211.1	245.2	213.7	97	91.1	101.9	71.8	95.1				25.4	32.3	48.7	214.2	212.5	201.6	40.8	32.6	40.8	86	58.4	74.2	42.5	28.9	29.8	48.9	49.3	52.7
F2D293	95.1	83.8	63.5	104.4	82.3	156.7	181.9	132.6	166.1	74.2	100.2	65.9	102.5	77.3	54.3	36.6	80.3	88.1	166.5	134.9	62.6	132.7	87	65.1	74.2	34.1	88.4	147.1	77.4	134.3	183.7	106.3	168.2	111.5	73.1	77.7	73.5	121.7	75.7	107.9	139.2	168.8	127.4	125.3	110.8	118.2	51.6	86.8	88.5
A0A287SC65	123.3	67.7	57.6	115.1	112.1	284.2	175.3			123.6	112.4	53.6	78.5	43.1	94.1	94.5	91.6	104.3	188.4	162	287.8	216.8	111.9	106.6	95	72.8	83.3	87.1	37.7	85.3	109.5	169.5	161.1	189.3	65.7	74.6	62.2	128.9	129.3	116.7	35	44.1	54.2	58.9	62	53.3	130.3	89.4	172.1
A0A287MDR8	99.7	137.8	103	157.3	193.7	80.9	51.8	155.3	143.5	150.5	178.4	184.5	127.1	132.4	136	157.9	125.7	109.8	196.7	191.4	60	80.5	93.4	135.3	144.7	136.6	162.8	208.3	61.5	75.4	51.1	130.6	170.1	183.9	92.6	116.5	111.9	65.2	62.2	129.7	111.1	83	106.6	99.3	160.3	147.1	59.6	61.8	137.3
A0A287PVL0	62.1	92.7	49.1	55.7	73.1	70.8	66.5	40.1	52.2	62	55.4	106.2	76.7	97.6	72.5	48.6	61.4	81.2	95.5	81.9	72.8	36.3	78.8	68.5	82.6	55.5	57.1	62.7	105.1	74.1	105.4	60.4	84.1	35.3	63.5	55.3	68.5	77.7	98.8	77.4	136.9	120.6	148.2	79	112.5	110.8	109.2	128.2	231.9
F2DAR5	101.5	202.1	115.6	92.1	150.9	70.9	115.7	108.5	102.8	141.3	81.7	123.6	57.2	84.2	76.8	134.8	124.4	102.6	154.9	84.7	58.7	76.2	54.2	61.3	97.7	60.4	134.8	224.3	87.4	115.5	76	84	145.1	112.3	124.1	138.5	137.3	226.5	127.1	100.5	91.4	104.8	159.6	83.6	156.1	96.4	81.8	89.5	109.6
A0A287LTI6	154.3	137.7	85.6	90.6	106.8	51.4	59.2	95.1	123.1	47.4	75.2	168.8	162.8	138.5	148.4	103.3	150.7	97.2	177.6	91.8	39.4	69.8	51.4	20.2	138.1	48	68	141.7	70.1	52.2	113.9	168	184	175	95.1	17	42.9	163	156.8	115.6	120.2	183.8	99.4	19.9	28.3	60.1	134.3	103.9	144.4
F2CZ13	198.4	150.5	118.4	18.5	15.7	45.1	49.3	23.3	19.2	22.2	19.4	33.6	35.5	32.5	41	34.7	37.5	165.4	177.2	254.7	157.9	83.7	144.8	180.4	131.9	131.9	165.5	138.7	116.7	93.4	103.8	165.5	143.4	141.8	138.2	101.9	79.4	134.1	106.3	146.9	22.3	12.8	15.8	149.4	106.1	146.2	122.8	112	139.6
A0A287KUJ3	177.8	198.5	157.5	52.5	57.6	289.7	288.1	75.1	76.4	80.9	75.1	109.3	107.9	155.3	113.3	112.4	73.8	148.4	122	68.2	376.3	265.3	361.8	91.5	69.4	97.2	127.2	111.9	215.3	188.8	253.2				81	92.6	62.2	182	92.7	171.3	97.8	103.2	61.2	165.8	201.4	163.9	160.2	198.2	125.4
F2DFA6	143.1	102.9	71.1	103.8	88.5	99.8	138.1	101.2	107.8	101.5	103.4	89.9	65.4	109.5	85.8	109.8	109	123.8	111.8	69	115.2	96.1	80.4	69.7	91	98.4	84.8	82.9	72.5	115	122.9	119	103	94.6	76.5	67.4	48.9	82	141.8	104.3	111	140.1	113.5	104	116.2	109.5	151.2	107.5	139.6
M0YDQ0	119.1	85.6	64.2																		67.3	63.3	63.5	91.8	65.3	69.1												94.7	148.9	100	106.1	90.4	116.1	77.5	89.5	70.2	76.3	97.4	61.6
A0A287PXV4	77.6	108.9	140.4	182	119.4	109.6	176.9	101.2	101.5	127.7	167.1	77.5	137.7	106.2	85.8	100.5	67.1	98.2	76.7	99.4	229.6	146.8	112.7	165.4	124.1	118.7	119.4	90.4	131.1	116.5	117.1	99.8	82.8	99.7	110.8	112.4	132.8	113.7	184.9	105.5	93	109.7	97.1	130.9	78.4	85.5	207.6	138.9	116.7
A0A287M6Q9										111.1	131.5	176.8	134.3	150.9				378	373.8	413.3							181	159.4							93	81.5	68.3
A0A287UST5	104.5	100.6	103.5	72.3	91.3	92.4	58	90.7	118.7	69.6	20	113.3	60.8	102.2	94.4	93.1	58.4	105.9	91	75	113.1	53.4	32.1	67.1	59.8	92.1	96.9	104.5	101.1	84.7	99	125.7	75.8	93.4	91.5	114.2	75.8	84.4	128.7	90.8	60.7	85.1	75.5	105.6	79.7	80.1	85.6	125.6	119.6
A0A287HZW2	153.8	47.8	186.5	128.1	59.9	158	99.4	43.5	39.3	68.7	77.4	53.7	42.6	68.1	74.1	71.2	61.2	91.5	86.4	64.4	320.9	60	134.3	176.8	127	157.9	63.9	74	115.7	141.5	185.3	197.4	205.9	139.6	95.7	155.1	129.8	184.7	145.7	165.5	81	54	61.7	191.6	167.6	100.1	305.2	163.8	152
A0A287JN82	44.7	42.2	45.1	57.8	54.4					38.2	42	118.1	121.7	150.4				86.6	54.1	53.4	63.2	33.4	50.2	36	39.9	29.8			111.1	108.5	170.4							35.5	41.7	55.3	339.3	301.3	282.6				155.1	108.6	115.1
A0A287GTY9	103	68.5	15.4	39.2	103.9	30.4	43.6	42	87.1	48	58.2	61.1	28.9	33.7	203.7	35.4	87.4	21.2	85.7	58.3	86.8	27	68.2	5.2	7.2	6.6			41.3	40.1	44	81	77.8	74.4	54.5	37.7	40.1	143.7	172.2	98.8	188.2	269	240	34.7	52.7	25.9	180.3	145	123.4
F2DVI8	126.6	104.6	152	162.5	171	21	17.7	46.2	48.7			141	101.5	132.1	29.8	37	30.8	61.4	60.7	72.6	122.8	131.1	136.6	71.9	70	73.1	83.7	73.6	44.4	19.3	44.3	227	191.2	236.8	65.1	53.1	60.1	180.2	173.2	218.9	120.2	126.1	136.7	51.7	43.8	46.1	115.6	99.7	84.1
F2CTY9	134.4	82.4	89.9	105.7	142.8	63.2	128.3	79.8	143	80.3	165.8	161.4	83.6	67	162.2	102	148.4	111	155.6	137.5	55.8	126.1	104.7	17.9	15.1	10.4	29.6	44	58.2	40.5	50.4	135.6	191.2	83.4	85	73.7	88.6	104.9	45.9	71.2	109.6	108.3	176.5	50.5	86.8	53.9	68.2	56.3	88.2
F2CV61				216.7	282.1	208.4	157														270.3	199.1	232.4																					461.2	385.1	346	101.5	136.4	155.1
M0UHA5	108.2	166.7	108.1	158.5	167.8	143.3	121.7	147.8	162	212.5	220.7	139.1	137.1	129.2	191.2	97.7	150.4	78.3	43.5	99	79.9	136.5	171.5	47	114.7	46.2	66.2	90.7	106.5	91.4	76.1	74.9	109.7	116.1	103.7	130.9	142.3	139.5	58.1	78.6	116	112.4	156.6	103.1	182.3	105.5	42.3	77.1	82
F2DDD5	228.1	230.6	168.5	114.6	135	65.5	61.9					149.9	102.5	127.3				146.3	173.5	146.6	161.3	93.9	167.1	51.1	69.8	63.9	79.5	64.7				87.4	95.3	71.7				188.9	242.9	177.2	136.9	174.4	155.9				70.9	95.3	82.2
A0A287PR25	108.2	77.4	113.3	133.6	85.5	114.5	93.8	143.1	158	85.2	104.4	168	132.3	134.5	77.8	114.4	71.1	100	53	62.5	288.7	57.1	244.6	126.6	71.3	68.5	139.6	101.6	101.9	54.8	82.4	77.7	120.6	76.4	105.2	86.1	86.1	129.2	95.5	115.2	117	100.7	67.8	103.9	92.1	121	141.4	78.2	110.9
M0YH64	145.1	104.4	126.7	130.9	48	13.7	12.7	239.8	177.6	22.9	59	100.9	55.1	20.5	26.8	24.8	13.9	16	61.6	43.6	120.2	97.4	108	15.6	15.6	14.1	276.3	168.1	84.9	203.1	98.4	84.4	123.2	237.7	93.1	87.3	126.6	31.2	35.4	102.3	55.5	94.5	86.1	19.7	30.7	28.1	196	170.4	242.9
F2DGF7				224.3	273.4	54.1	42.8					77.6	66.2	75.8	55.8	45.7	50.9				70.6	78.2	78.9	72.5	122.8	106.8	149.3	167.6	68.8	60.1	24.1	72.4	60	72.3	115.4	120	116.8				244.1	229.6	227.2				55.5	69	48.1
F2D9R2	295.8	470.6	478.3	814.5	874.5	61.9	67.4	42.6	47.1	173.3	74.2	71.8	202.6	58.2	74.9	43.8	29.9				377.4	468.4	134.9									391.8	368.8	412.7	85.3	116.5	145.2				74	132.4	196
F2D1Q5	52.6	50.3	57.6			24.6	22.3					42.4	41	48.2	27.5	22.4	20.2	21.5	26.1	25.2				49.4	44	32.5	61.4	64.5	76	64.1	59.7				399.7	330.7	398.4	35.5	54.7	47.8				22.8	21.8	18.1	267.3	287.9	229.1
F2EBI3	123.1	58.9	142.1	129.7	72.4	123.4	105.1	58.2	49.5	66.4	62.2	90.4	80.9	101.3	268.5	262.8	291.6	59.2	55.2	42.9	373.8	186.3	167.4	135.7	72.5	115.3	44.6	56	80.7	36.7	106.9	151.5	159.8	256.1	138.4	204.5	170.8	37.3	53	92.9	81.7	58	56.4	175.2	97	103	184.4	126.8	176.1
F2CQ27	47	43.5	52.4	65.8	48.4	133.9	169.9	52.3	76.4	70.7	94.2	88.6	152.8	98.8	62.3	102.7	63	57.7	54.1	51.4	173.5	128	140	127.7	104.8	139	54.5	73.8	109	116.2	133.9	100	78.2	66	95.8	115.4	100.1	43.6	123	72	74.1	34.1	43.2	112	66.1	96.6	171.9	130.9	164.6
A0A287J1Y0	91.4	52.2	96.9	29.1	24.9	68.9	61			19.8	18.5				44.7	33.7	36.5	57.3	23.7	22.9	87.3	86	98.5	116.6	104.6	69.3			141.8	112	130.7	153.7	82.3	87.8	35.3	32.3	45.3	175.3	199.2	165.9	89	72.3	68.6	300	346.6	191	257.4	236.5	146
F2DSX3	106.5	74.7	123.4	148.6	74.8	129.2	108.7	56.1	73.9	38.7	50	39.1	68.9	79.1	53.3	85.1	48.1	120.3	105.7	133.3	414	158.3	303.9	287.8	123.1	235.1	82.4	70.3	139.4	112.9	166.6	169.6	84.1	129.9	97.2	93.7	115.7	120.7	151.3	95.4	65.4	57.7	26.3	246.6	113.7	223.6	326.1	158.8	184.7
F2D8I4	52.3	63.8	27.4							956.8	856.7				226.4	318.9	171.7	57.3	53.6	53.7	35.6	34.8	53.7	38.9	41.7	48.5			539.1	409.2	416.1				140.8	101	159.9	65.6	62.6	53.5	69.2	32.5	39.1
A0A287DTW3	32.3	56.6	51.1	66.5	12.9	313.7	398.8	339.1	234.7	269.8	81.6	58.9	34.6	28.6	15.5	42.1	60.9	41.2	16.2	26.2	11.5	71.2	57.9	74.7	94.2	45.8	616.6	467.6	67.5	558.4	151.6	213.4	116.6	285.5	55.6	113.8	122.9	46.3	52.4	61.2	33.9	39.7	27.1	332.3	253.9	380	236.7	161	152.3
A0A287NH13	51.5	50.5	50	73.6	76.2	54.2	39.3	89.9	31.4	68	59.2	54.2	51.6	53.5	46.2	35	33.9	65.2	106	48.7	44.5	36.8	36.1	32.7	25.6	16.8	57.5	34.9	83	84.6	90.9	93.6	74	88.7	68.3	57.1	93.7	76.8	63.3	58.2	166	169.7	145.9	97.3	227.5	126.5	62.9	68.4	136.8
F2CPS1	185.8	283.3	54.2	71.4	38	81.1	76.1	119.4	121.4			133	110.8	208				52.1	116.9	79.6	17.1	15.1	21				152.2	188.9	41.2	57.9	28.5	96.4	82.5	99.2				79.7	134.4	110.9	57.5	43.3	60.9	21.3	21.4	10.5	77.7	87.8	118.5
A0A287MUG1	41.3	40.2	27.3	135.9	125.9	87.1	85.5														107.9	97.9	101.5						92.7	115.4	86.8				623	972.3	596.7				66	59.7	49				577	577.4	685.8
Q8VWW3	97.1	73.8	97.9	124.3	77.5	36.8	35.2	59.8	35.4	74.3	79.9	81.7	62.7	39.4	72.8	60.5	81.7	95.3	42.1	64.8	199	220.1	312.8	187.8	124.8	88.9	35.6	23.9	68.7	170.3	155.6	17.3	9	16.4	93.6	111.3	192.3	78	42.1	85.6	41.7	46.2	41.2	133.9	104.6	80	123.8	104.9	143.2
A0A287WAX2				56.6	55.4			62.7	155.4						96.6	82	67.8	101.8	96.7	89.5	53.1	49	23.1				148.6	138.6							55.5	41.3	46.6	137.4	216	201.2	91.6	63.9	143.5				48.4	43.7	60.6
A0A287PXJ9	144.3	69.8	24.4	56	60.5	116.7	90.9	198.2	158.8			167.5	22.6	84.2				97.8	193.5	34.5	49.5	48.7	53.2	38.8	37.1	36.4	120.5	144.6	146.7	113.5	155.1	119.1	133.4	160.5				102.5	134.3	108.4	194.1	219.3	291.5	43	124.8	93.3	89.3	120.4	89
F2D9U3	107.4	145.4	133.2	122.1	190.6	45.1	70.8	97.7	88.6	103.3	102.9	70	64.9	63.9	64.3	69.3	72.4	148	109.6	97.4	101.2	126.8	92.6	91.4	116.3	85.9	103.3	144.4	139.9	135.4	155.9	115.5	106	153.1	45.3	71.5	47.9	123.2	93	65.9	112.5	64.9	129.2	88.5	89.8	67.9	82.5	65.3	72
A0A287SFZ8	152.8	109.2	106.9	64.7	69.9	74.2	72.9	160.5	151.7	34.6	45.2	48.2	68.4	63.1	125.3	102.5	96.1	113.4	67.8	119.8	124.3	48	161	55.3	43.6	53.3	16.6	23.6	58.7	29	34.1	34.9	32.7	32.2	40.9	30.5	27.9	106.2	94.9	109.4	108	126.3	132.2	78.2	89.2	60.9	82.2	72.3	80.6
M0VVW8	154.9	142.9	140.1	118.2	108.7	66.5	59.7	156.1	150.5	78.2	74.3	101.8	114.8	96.1	144	108.8	130.9	137	165.7	138.4	189	163.4	167.2	62.6	86.9	62.8	78.1	73.6	53.3	108	73.2	74.2	100.3	83.4	116.5	158.2	133.1	125.7	86	117.7	54.9	75.9	100.4	68	82.9	59.6	141.7	143.5	138.2
F2CQK9	73.4	92.3	95.5	197	174	87.1	122.5	80	139.7	147.7	250.1	113.9	145.9	80.3	82.4	84.4	122.6	116.3	112.4	178	119.6	207	255.8	56.6	129	55.7	92.1	137.8	109.3	98.3	80.9	73.6	155.5	128.8	117.8	110.7	93.8	86.5	66.8	104	170.5	102.4	227.3	73.3	111.5	95.5	58.9	61.3	74.6
A0A287EE97	106.2	107.8	76.6			106.2	112.9	39.2	36.6			198.5	140.7	152.2				28.4	162	36.8	55.3	31.2	45.9						85.9	70.2	86	120.7	123.8	104.1				81.6	65.3	148.7	95.5	127.1	70.2	91.7	200.7	147.2	56.1	81.8	146.5
A0A287X4T5	61.2	132.2	109.4	126.2	119.6	45.3	40.8	109.8	101.7	103.6	78.5	76.5	123.3	91.3	128.9	110.1	98.2	79.9	114	102.9	87.7	103.5	91.4	51.8	69.4	57.5	94.5	89.1	78	76.9	80.6	74.1	78	81.1	111	102.4	98.2	142.2	91	90.6	81.5	118.1	115	66.7	71.9	76.9	64.3	72.9	91.5
A0A287SZV1	94.4	87.6	61	121.9	138.1			220.4	223.3	216.4	211.7				146.8	125	182.8															118.2	101.8	108.1							324.1	262.1	245.2	444.8	431.1	623.3	139.4	231.4	144.8
F2D8N3	119.9	110.6	147.5	96.7	91.8	181	120.4	110.3	84.6	71.4	56.7	84.2	64.3	85.9	65.4	109.2	67.4	111.2	94.1	128.9	253.3	122.1	126.5	299.6	131.3	162.6	121.5	63.8	132.8	106.1	134	58.6	26.6	13.5	139.3	167.6	133.2	75.3	84.3	76.6	56.2	57.4	57	147	89.4	120.5	211.6	134.3	109.1
A0A287QVU9	25.7	34.5	28.6	202.1	224.9	192.9	164	29.5	47.4	30.4	25.7	42.3	40.9	51.4	46.8	95.7	35.7	32.1	31.7	23.4	194.5	214.6	167.4	53.2	57.3	97.4	214.8	323.6	113	288.4	139.3	26.7	13.4	48.2	17.6	28.2	25.8	157.2	197.7	198	15.7	35.2	52.1	164.2	205.6	162.5	153.8	152.7	191.8
F2DA07
F2CYS4	118.3	113	117.4			130.5	127.9			64.1	59.4	103.9	32	47.4	81.5	90.9	93	104	84	86.9	100.6	63.9	85	33.8	34.2	28.4			126.3	163.2	196.2	64.2	51.5	70.8	47.8	41.7	41.1	61	50.7	57.8	129.9	126.3	119.2	213.3	140.3	143	146.4	161.1	123.3
A0A287P2A7	74.5	81.9	85.3			130.7	140.4	111.2	79.9	32.6	32.7	159.4	76.4	90.4	49.3	45.9	28.7	47	148.8	106	25.6	28.1	27.3	126.5	73.8	91.4	145.7	56.8	182.7	205.5	78.4	45.1	118.8	126.1				96.4	147.2	105.2	28.2	127.4	81.5	112.4	126.2	118.4	55	109.2	121.5
O04896	158.1	178.4	198	54.1	37.7	522.1	468.2	59	56.7	73.6	67.6	92.7	97.9	50.5	65.2	52.1	72.4	58.6	60.6	75.9	438.3	129.1	335.5	100.7	148.9	127.2	25.4	31.2	214.2	129.5	166.6				102.9	144.8	157.4	94.1	68.3	60.6	47.5	41.3	48.8	105.1	86.4	99.2	131.5	121	157.8
A0A287W050	113.6	124.7	89.5	95.1	76.7	74.7	54.4	139.7	91.8	57.3	48	140.1	101.2	64.4	101.6	87.7	63.9	94.4	117.1	144.8	67.4	77.3	88.7	29.4	39.2	29.5	118.4	103.4	39.3	32	36.9	58.8	126.5	115.6	111.3	114.4	101.8	116.4	28.9	76.1	137.2	70.9	89.9	105.4	129.3	104.3	51.3	94	107.6
M0YUL2	95.3	78.2	58.5	53.6	57.6	37.8	74.7	35.9	37.2			39.2	33.8	57.4	81.4	94.3	70	62.7	62.4	81.2	324.9	317.1	305.3	223.2	191.7	158.2			81.4	93.6	75.5	140.9	46.2	71.6	94.2	124.9	55.4	39.9	42.8	46.6	78.8	165.8	98.9	106	41.9	129.4	358.8	217.1	208.1
M0VYW3	68.8	128.5	73.2	327.3	216.8	118.5	88.3	211.9	158.7	273.2	239.6	155.6	140.4	108.2	154.7	71.9	105.4	58.7	44.9	55.7	86.1	164.6	257.8	62.4	125.4	62.2	93.9	115	164.8	154.2	132.4	61.1	127.9	192.7	95.7	156.1	176.1	236.8	183.7	157	134.5	86.9	123.1	80.5	76	58.5	136	151.7	188.7
F2CXR8	90.4	70.3	91.2	75.7	114.3	50.8	46.1	107.4	100.7	229.8	320.2	66.6	68.4	61.6	210.8	248.9	222.7	213.5	260	198.3	87.2	86.3	90.1	143.5	163.9	190.4	85.2	97.8	62	104	64.8	53.1	57.1	97.4	152.7	151	164.6	91.6	174.5	186.8	156.3	174.7	132.3	102.6	125.8	55.4	56.3	55.4	129.1
F2E2K8	84	107.1	185.6	60.2	50.6										141.9	84.2	77.5	84.5	48.5	97.6				375.2	451.3	189.8	127.9	116	147.3	105.7	129.4	32.3	43.7	42.4	129.4	113.4	106.4	310.6	196.7	105.4	98.8	105.5	89.1	102.2	100.5	109.5	277.3	371.5	232.5
F2E805	44.1	49.5	28.2	47.2	43	58.7	59.6	32.1	21.1	81.5	160.6	249	161.6	252.8	71.2	46.4	51.5	48.3	63.2	36.9	43.9	55	75	50.5	65.9	167	60.4	53.6	37	39.3	23.4	36.5	55.3	29.9	56.9	89.7	65.7	210.6	253.7	167.5	249.8	217.1	272.6	20.2	18.9	17.6	22.5	26.7	23.6
A0A287EIM2	19.7	16.6	21.1	19.7	24	18.9	36.7								43.6	57.1	75.9				300.5	200.4	211.8	264	245.7	186.9	22.7	23.2	25.7	26.8	53.7	108.7	107.6	101.8	93.7	130.6	119.1	120.3	107.9	110.7	87.1	88	78.8	135.4	84.2	42.4	440.6	264.3	313
F2DAC4	114.4	114.7	89.5	124.6	243.7	47	84.2	76	66.8	98.6	101.9	63.5	153.2	79	130.5	58.5	78.5	101.8	77.6	115.6	167.9	196.8	142.5	74.7	89.6	50.2	58.8	70.3	44.5	67.2	62.2	67.1	77.9	91.6	108.5	123.1	127.7	46.9	58.4	66.7	153.9	163.8	243.3	71.2	68.9	89.6	51.2	66.6	39.8
A0A287UIJ6	104.9	74.7	102.4	120.5	54.1	344	427.7	66.7	78.4	57.2	55.7	46.8	86.4	70.6	68.9	86.9	42	76.5	59.3	61.2	197.1	87.4	111.3	94	32.6	91.8	45.7	46.9	83.9	53.6	84.4	105.5	65.2	79.3	83.9	99.4	110.7	74	115.8	93	87.5	80.1	60.8	97.5	59.1	94.3	123.2	88.4	63.1
A0A287RJR5	68.8	69	68.2	93.5	97.9			15.2	16			166.2	156.7	162.8				19.3	24.5	28.4				18.9	22.9	24.3	153.9	181.9	72.5	58.7	42.4	48.4	61.8	54.4	92.7	167.3	129.2	106.7	112.9	138.2	124.5	82	113.7	155.1	147.9	127.9	67.3	54.2	66.5
A0A287FWY4	263.5	192.5	139.2	78.9	57.7	12.7	12.1	37.7	40.9			92.4	80.9	96.9	28.7	31.8	28.8	71.9	59.5	88.9	294.1	57.6	353.8	208.8	166.8	269.8	154.4	194.7	70.5	118.4	100.2	79.3	55.3	102.5	42.4	48.6	41.6	17.3	23.7	28	121.2	104.3	113.6	22.1	30.9	17.7	58.1	57.4	60.3
A0A287VMX4	50.3	53	70									42.2	33.9	36.7				51.5	53.2	41.6	132.2	136.4	121.4	73.3	71.5	71.6			149.8	142.2	126.3	119.8	116.1	91.2	72.5	92.7	69.3	38.4	35.8	70.8	100.7	89.3	92.8	86.1	78.7	58.3	222.2	159.9	223.8
F2E974	62.6	50.4	38.6	83.5	84.3	108.2	154.2	163.2	135.2			165.1	80.6	72.4	83.1	84.4	84.4				83.7	83.9	102.7	50.2	43.4	39.6	152.2	91.9	159.7	137.8	142.7	83.8	123.6	98.9	84.3	119.5	152.3	57.1	28.8	38.1	90.6	169.5	100.7	125.3	155.2	77.2	105.4	111.6	99.7
F2D5L2	89.7	30.5	63.7			270.6	245.3					225.7	302.9	227													41.4	52.1	151.9	123.7	152.8	157.5	158.5	267				86	82.2	96.7	121.5	103.7	134.2	75.4	206.1	73.5	75.3	92.9	114.3
A0A287R566	159.8	136.5	141.5	50.3	62.9	42.3	43.4	133.2	133.5	132.1	133.4	108.6	107.1	108.3	76.8	75.5	100.7	94.3	137.3	102.1	142.6	85.2	118.7	123.6	142.3	110	125	129	81.4	124.4	105.8	101	127.9	103.9	100.1	109.2	75.8	107.2	77.4	100.8	173.7	125	126.6	84	137.5	104.3	81.8	98.6	68.6
A0A287FRQ6	120.8	162.7	132.5	82.9	110.2	70.7	53.1	131.4	128	95	97.4	96.9	110.2	109	59	62.5	101.8	118.4	178.4	114.4				27.8	19.6	27.8	113.8	110.8	57.3	62.1	58.8	150.8	116	112.9	98.8	101.8	103.4	191.8	118.3	97.3	103.3	105.1	116.3	53.4	61.8	49.3	27.2	22.9	24.6
A0A287WWV0	86.3	133.8	68.2	63	73.9	114.8	105.1	143.6	146.3	77.9	84	154.4	112.2	89.3	79.5	70	76.2	111.4	140.8	73	43.4	55.1	59.4	46	106.2	86.3	114.3	133.2	75.2	75.2	76	63.8	99.6	117.3	55.9	67.6	45	103.3	97.8	89	60.4	105.7	68.8	66.8	132.3	76.8	66.2	137.6	127.7
F2D2B8	76.5	53.8	82	181.4	93.7	128.2	79.8	115.5	83.8	143.4	188.6	113.6	113	81.1	65.6	59.5	86.5	61.9	166.2	113.7	72.4	183.2	156.8	63	109.8	49.4	99.5	53.6	117.2	147.7	117.2	128.3	193.9	93.6	96.5	65.3	138.3	71.6	62.6	127.4	132.8	163.3	135.6	125.9	174.8	113.6	81.5	101.2	103.6
Q9T2L5				150.9	160.6	83.8	86.4								88.5	55.3	49.7	67	64.9	62.5																					28.1	45	35.1				126.2	88	174.7
A0A287J6Y7	275	185.9	137.2	66	67.4	69.1	66.7	53.1	44.1			163.3	102.4	119.6	169.1	152.6	168.5	100.2	116.7	116	22.1	27.1	29.1	41.6	57.9	57.5	109.2	97.4	80.4	66.8	98.1	49.1	46	63.4	71.4	62.6	77.6	75.5	52.1	49.2	146.9	196.5	147.3	134	168.2	111.8	43.1	48.7	45.4
A0A287R7H8	179.7	204.2	166.2																		308.8	410	225.4	159.6	156.6	159.1			80.2	106.2	102.8	145.9	97.6	127.7	160.6	142.4	155.4				217.7	195.4	204				229	266	258.6
A0A287SP63	78.8	53.3	109.9	91.2	46	138.9	129.6	44.4	34	39.3	39.6	62.7	76.2	77	75.8	73.5	71.7	79.9	73.8	71.1	278.5	164.6	160.1	203.6	89.8	220.9	70.8	35.2	181	102.2	164	152.9	130.6	105.3	77.1	117.1	84.8	72.8	66.1	85.4	106.7	65	87	185.3	145.5	164.9	249.8	164.1	84.8
F2D334	137.7	122.7	100.4	139	101.2	114.6	131	156.8	85.1	130.9	133.5	213.6	91.6	80.3	96.9	55.7	70.6	90.6	118.2	111	61.5	160.3	166.8	49.6	92.3	36.1	138.7	92.2	103.5	118.4	132.9	92.9	216	176.2	166.4	129.6	203.1	106.2	76.7	98.4	93.5	93.2	176.1	116	163.3	129.8	92.7	71.3	174.3
A0A287SHI8	40	55.5	61.6	133.2	171.6			52.5	51.7			177.9	193.5	171.8	114.3	146.1	84.9	211.6	182.3	188.2							209.4	264.1	247.8	245.8	161.6	174.3	196.1	189.3	98.2	74.2	63.7				225.1	153.5	164.5				152.2	241.4	160.6
A0A287K1M0	94.6	65.2	70.5	17.2	13.7							104	97.1	76.1	95.5	80.4	62.3	70	65.4	62.3	34.2	21.2	30.5	21.1	15.7	29.3			38.3	32.7	32.8	71.3	69.7	77.1	67.3	58.5	81.5	298.1	296.7	244	104.8	95.6	110.6	59.4	74.2	47.9	17.6	26.2	29.4
A0A287IBQ3	174.1	118.4	173.2	110.4	120.1			124.1	125.7	99.4	54.7	254.3	229	178.4	77.6	120.8	97.5	58.3	72.5	72.2	42	49.9	28.9	134.4	146.2	164.3	166.2	195.2	109	109.7	171.4	66.6	68.9	54.4	110.7	92.2	87.5	64.6	81.1	80.5	111.8	162.2	158.8	56.7	44	32.9	70.1	67.1	91
F2CR14	52.5	60.8	41.1	41	35.9	24.8	20.9	29.3	35.6	83.4	80.7	99	60.3	80.8	116	79.3	65.5	61.2	84.2	91.4	146	125.6	136.9	27.8	31.4	26.3	34.8	29.1	31.8	44.6	31.4	95.2	115.7	100.8	86.8	89.6	96.2	88.7	80.8	66.7	75.9	97	102.5	87.2	81.5	67.3	122.5	87.6	137.7
A0A287HL86	91.9	101.1	69.1	28.9	58.9	94	90.3	88.2	87.5	54.4	56.7	67	72.9	38.6	66.4	86	118.4	151.5	114.3	224.6	67.5	104.1	98.7	83.7	92.3	74.2	80	43.8	58.5	48.1	55.1	111.7	162	115.5	46	50.7	44.8	153.7	110.6	115	89.7	79.1	95.4	96.5	138.9	106.1	27.9	29.1	41.1
F2E2F1	234.7	169.6	48.5	39.5	34.7	175.9	183.6	88.8	86.1			212.9	201.5	168.2	8.3	7.3	6.2				40.8	40.3	42.7	10.5	10.6	8.7	74.5	67.5	274.5	219.1	191.6	96.9	163.3	140.4	34.3	36.6	40.2	101	140.6	71.8	144.8	220.8	178.5	46.7	147.4	85.3	65.1	95.2	42.7
A0A287VQP9	139.6	149.4	96.1	189.4	167.9	107.2	154.4	127	92.6	58	53.6	94.3	39.7	88.3	117.5	103.9	112.4	120.9	131.7	104.7	83.7	124.3	115.6	75.5	53.7	123.1	90.9	90.6	64.4	59.2	81.3	103.6	96.8	81.4	93.4	32.2	142.7	48.8	49.9	73.4	139.7	121.4	208.8	199.7	109.7	133.9	100.5	126.9	70.2
F2CX25	136.2	75.3	196.2	99.7	65.2	77.2	88.7	75.3	74.5	50.7	48.6	57.4	89.8	91.7	25.3	95.8	47.7	123.2	48	65.4	279	67.2	30.1	209.3	60.4	178.9	75.7	90.3	98.1	72.8	119.6	124.2	38	59	117.1	214.8	125.6	34.7	143.2	94.3	91.5	96.3	31.9	125.1	38.5	103.3	204.6	100.3	74.1
M0Y8I0	82.5	63.6	69.3					39.9	45.7						27.3	34.5	37.2															58.9	74.6	32.7													397	69	259.6
A0A287PBY3	104.6	106.4	118.9	102.7	103.4			95.8	103.5			36.6	40.8	16				118.3	152.7	103.8	208.7	202.3	158.3	69.9	71.5	86.7	33.1	39.5	15.5	28.2	15.8	230.5	184.1	191.4	11.7	17.2	14.7	104.6	98.8	122.2	31.7	42.7	30	36.4	40.2	32.2	65.8	78.6	50.7
C1IC97	151.6	88.5	81.4	134.6	89.2	102.8	84.6	119.3	166.4	95.5	66.6	100.4	67.6	35.8	103.8	95.2	72.5	63.3	123.4	71	78.7	70.3	64.1	45.2	48.9	60	67.8	130.1	36.5	86.7	75.7	100.2	91.7	121.7	93.7	97	106.7	87	218.3	90.4	90.4	172.6	76.1	72	75.4	96.2	109.9	97.2	160.9
S4Z1A6	105.4	80.5	146.5	123.3	77.4	121.2	111.9	62.2	61	89.4	88.9	93.8	83.7	82.6	63.9	80.1	40.3	100	71.2	47.4	265.3	95.5	169.8	239.7	89.1	130.4	74	78.9	166.7	138.5	148.3	108.6	81.7	69.7	124.5	197.2	126.2	54.9	89.1	116.3	93.9	105.8	58.7	123.6	127.4	117.9	192.9	164.3	96.5
M0US99	96.6	78.7	84.8	27.8	32.1	26.9	33.9	39.2	47.6	24.3	28	79.6	95.3	57.3	23.5	21	25.1	38.8	88.3	56.9	31.8	33.8	22.6	39.8	43.8	30.4	59	24.8	41.2	54.2	71.7	90.7	99.2	65.1	31.2	43.2	70.4	184.6	235	105.7	226.7	212.8	210.7	168.5	71	81	123.5	121.3	179.7
A0A287QXL1	112.9	81.6	209.4	138.3	69.8	79.9	53.8	62.7	47.9	25.7	24.7	73.3	98.9	99.7	62.3	73.2	59.1	135.9	110.8	123.6	148	121	69.9	132.8	83.6	118.4	99.2	70.2	108.4	75.4	102.5	160.4	113.5	160	67.8	101.9	126.3	134.7	147.3	163.6	99.5	108.4	84.9	21.7	22.5	16.6	190.7	171.1	84
A0A287J4M0	122.9	151.3	174.7	122.3	114.7	81.6	64.9	54.1	41.9			64.5	53.1	50.5				70.1	82.8	70.6	229.6	231.1	209.2	164.9	165	166.5	34.3	39	105.6	108.2	144.9	116.4	91.5	105.6	50	32	85.2	109.6	88.4	105.2	138.1	99.6	113.1	32.8	20.2	39.3	185.1	106.5	144.5
F2D355	182.7	173.9	143.7	90.6	88.6	154.3	148.8	149	101.6			192.1	220.9	226.6				27.2	27.1	31.4	112.5	90.8	83.7	38.1	25.9	20.8	23.9	26.6	249.4	170.6	239.1	191.4	289.1	84.1	35.7	42.7	32.7	97.1	23.6	127.1	193.3	162.3	174.1	75.8	119.1	90.2	61.8	86.1	70.8
A0A287MCJ7	39.3	98	121.4	86.5	84	116.5	46.3	63.2	58.6	59.1	62.3	59	58.9	68.8	96.6	115.9	50	66.2	53.9	97.7	156.6	80.7	164.4	222.6	187.9	211.1	136.7	108.1	122.6	116.9	65.6	46.3	34.1	69.2	66.3	37.8	68	68.9	365	44.7	89.7	89.7	50.8	109.7	115	93.6	117.5	79.5	131.4
F2E195	218.6	267.3	267	49.5	39.7	53.3	68.3					51.3	46.8	51.9	32.7	48	50.6	38.4	42.3	41.1	306	295	255.4	140.5	233.8	234.7			99.7	96.5	87.5	143.9	163.3	139.5	215.2	92.6	110.8	126.3	146.6	176	63.2	53.9	39.8	233.8	147.9	89.3	426.7	53.6	225.9
A0A287HJT1	130.2	100.6	93.9	56.2	57.9			229	203.6	83	77	52.3	67.5	59.4	62.4	65.1	53.1	35.8	78	57.9	39.6	43.2	59.1	52.2	52.2	30.4	56.6	46.5	35.3	42.1	52.2	124.4	72.2	90	92.9	137.4	96.8	113.2	155.9	181.4	203	195.4	149.6	39.5	28.8	25.2
F2D8E5	108.5	238.5	130.8	411.8	111.7	55	95.6	414.3	381.1	286.7	242	28.8	33.7	38.4				40.4	33.3	29.5	68.2	94	98	107.6	94	98	38.7	73.6	26.1	34.1	50.6	36.5	47.1	59.9				19.1	24.1	58.4	170.2	83.3	144.2	50.4	63.5	53.8	53	100.8	67.6
F2DR77	75.4	111.4	82.4	92.3	106.7	52.7	85.2	63.4	72.1	56.8	55	92.4	85.1	85.5	84.5	98	78	67.4	59.5	50.6	245.7	194.6	245.3	312.8	309	246.3	117.5	147	101.7	74.5	86.2				91.1	116.2	86.6	60.2	51.9	106.5	116.7	74.9	103.1	42.1	39.9	32.1	153.9	111.4	126
M0Z390															119.8	81.7	84.1							206.2	258.4	230.4						89.3	104.7	167.7	74.1	78.7	73.1				92.2	102.2	112.2
F2DH00	131.1	145.9	177.8	32.3	29.8	39.8	46.4	28.8	23.1			25.5	21.2	39	23.6	29.7	17.1	42.7	44.2	35.4	212.8	193.3	135.4	171	123.9	132.4	33.8	32.5	128.1	133.9	127.7	95.6	85.6	86.9	77.4	89.8	93.8	49	33.8	42.8	54.2	50.1	43.8	289.6	210.7	173.6	251.2	166.8	122.7
A0A287X1F5	72.9	112.1	105																		243	235.8	259.9	171.4	203.7	160.8			127.6	91.8	115.9	81.8	97	94.5	182.6	184	177	96.6	58.3	90.3	99.4	65.4	72.2	91.3	105.1	118	292.9	353.1	329.4
F2D249	161.1	81.3	113.6	92.4	105.3	54.8	105.6	103.8	87.6			137.4	65.4	60.8	106.6	74.5	79.6	93.5	62.6	75.3	244.4	187.4	96.2	66.8	70.3	88.3	66	76.3	102.3	181.1	87	162	59.3	114.5	56.5	58.9	52.7	81.3	136.5	69.2	50.3	64.6	60.6	143.5	123.6	104.6	187.3	105.4	73.8
A0A287XG59	142.4	123.3	80.4	82.7	117.3	85.8	159.4	89.4	138.8	165.7	169.1	121.3	123.3	177.4	87.8	156.2	91.6	158.2	160.5	102.4	129.1	82.9	89.2	95	160.4	95.2	134.2	155.1	177	106.7	104.8	111.8	122.1	167	123.7	82.3	70.8	113.1	233.4	83.7	51.3	69	69.7	105.1	122.4	103.5	127.9	77.3	205
P15737	82.9	87.5	118.7	156.2	222.6																152.5	195.7	97.5	83.7	71	78.2												152.9	139.8	135.8				634.1	580.8	520.5	1002.3	812.8	1128.5
F2E2Y9	34.9	44.9	48.8			134.6	264					176.1	64.6	60.7	214	173.8	180.5															124.8	133.1	171.6	105.4	102	79.4							50.8	131.6	68.4
M0YLC8	115.5	129.2	106.8	115.4	121.8	99.1	93.2	59.8	84.7	128.2	82.9	125.3	93	112	126.1	100.4	98.8	93.8	144.2	143.7	91.4	111.2	121.8	56.3	98.6	77.4	50.3	87.6	101.9	109.3	81.3	124.1	132.7	112.1	100.7	139.5	81.7	151.9	54.5	100.9	64.2	109.8	143.3	71.8	95.1	88.6	59.7	56.5	105.2
A0A287IL79	65.7	83.5	60.5	51.9	47.6			43.7	35.1			76.3	74.5	53.2	33.2	34	33.1	67	90.4	69.6	155.4	182.4	148.5	104.4	88.3	67.1	93.3	114.7	95	120.1	118.4	62	48.1	45.7	22.7	57.1	64.5	116.4	126.5	121.3	113.7	95.5	103.9	90.1	89.5	90.3	240.3	218.5	163.6
A0A287LZU9	146.1	93.4	119.2	140.9	67.4	70	77.9	58.4	63.4	47.1	75.2	89	115.3	78.6	78.8	65.9	69.8	73.2	88.3	102.6	119.8	82.9	125.5	105	61.3	70.2	54.4	57.5	140.3	118.1	129.3	111.1	109.9	93.1	82.2	130.1	141.6	63.4	99.3	83.1	114.6	116.6	111.5	45	35.1	33.1	171.8	133.7	125.3
M0YS97	120	61.9	126.4	64.4	60.4	64.4	104.9	70.2	62.6	74.1	62.4	56.1	74.7	83.5	91	119.6	119.2	83	111.4	99.6	292.9	276.5	306.7	254.7	92	117	181.4	120.3	196.8	106.8	108.8	124.5	104	95.5	77.6	111.2	99.5	120	90.8	84.4	87.1	133.1	66.6	149.7	147.5	112.1	129.5	111.4	79.3
M0V3W4	70.6	42.9	143.5	54.3	110.8			95.5	97.8	81.9	90.8	80.3	37.4	73.1	46.9	34.4	28.3	87.4	96.6	62.4	254.4	94.2	125.2	90.3	160.9	105.7	63.3	105.2	78.5	82.1	50.5	104.8	66.3	58.5	73.6	67.9	86.4	69.2	75	80.4	52.4	53.4	50.5	42.5	45.1	37.5	227.7	202.9	230
F2CYS2	132.8	244.5	107.4	159	177.8			222.6	333.3	181.2	235.1	73	103.6	185.9	240.4	197.1	161.1	26.4	37.2	28.7	208.5	174.5	248	164.2	133.2	113.1	179.5	174.5	114.3	140.2	113.1				196.2	292.4	199.8	50.9	62.5	50.7	72.3	19.7	124.8	23.1	28.6	24.6	35.4	26.5	52.9
A0A287QUE9	82.2	231.7	80.7	65.3	134.4	75.3	142.6	100	164	183.9	99.6	93.6	129	153.3	206.9	165.9	164.9	148.2	54.1	58.4	130.9	75.8	144.9	229.8	299.4	135.8	74.8	117.4	159.3	111.7	48.8	54.4	32.9	68.7	186.7	192.5	121.3	81.3	82.6	69.1	82.8	57.7	140.5	80.9	58.1	56.3	113.5	170.5	135.9
F2E1W2	106.8	73.1	102			31.4	38											36.1	42.8	48.5	138.7	131.6	196.1	241.9	214.3	242.3	51.7	55.3	47.4	54.8	55.4	55.8	54.7	48.4				39	36.2	41				167.1	146.8	149.3	163.1	104	115.6
A0A287UY36																					159.4	194.1	186.4	201.5	204.9	215.2			426.2	378.8	306.5
A0A287P1F9
A0A287JSF7	125.8	109.4	143.3	70.9	74.3	99.5	130.8	56.4	49.5						20.1	20	18.5				284.8	324.9	280.7	190.4	218.6	191.6	40.9	38.7	49.2	60.2	66.5	100.1	101.4	126	109.6	111.6	111.9	164.5	130.2	192.7	143.1	131.3	123.7	213.5	182.2	239.5	296	177.4	308.2
Q9M5G3	83.2	66.7	82	128.8	240.5	90.9	110.3	99.9	165.7	173.6	92.1	82.2	81.3	71.8	46.9	45.5	32.6	36.4	23.8	14.4	186.7	95.5	110.2	162.5	147.8	141.3	66.4	60.1	91.7	104.3	107.9	76	55.7	140.4	124.7	204.5	122.8	87.7	87.1	78.7	85.3	86.8	66.9	92.8	88.6	87.8	111.9	115	86.1
Q5D611
A0A067YHQ4	21.1	19.8	21.1	14.4	17.9										80.7	69.3	69.6	16.6	18.6	17.8	30.3	33.8	38.4	20.1	19.8	19.8			21.9	17.1	30.9				17.6	24.1	20.4				15.2	13	14.8	21.4	21	17.9	36.5	35.9	31.7
M0XNN4	75.2	82.3	51.6	81.9	59.2	71.1	53	167.5	96.8	57.7	85.4	79.8	119.5	107.4	60.8	64.8	51.6	110.2	87.5	74.2	82	80.5	56	94.9	98	85.5	87	84.2	121.1	218.4	101.5	31.7	57	108.8	65.7	59.3	71.7	87.4	139.8	88	60.6	138.2	95.3	97.8	92	85.3	149.3	102.6	113.2
A0A287HU60				124.4	143.5							95.9	90.7	89.8	123.2	64.9	83.2	168.2	113.6	165.5	104.1	165.9	221.5	132.9	173.7	149	222	210.8										145	160.9	160.1				104.9	105.8	103.5
A0A287LAC1	212.6	288.8	270.8	99	91.6	260.9	238.1					200.4	97.5	194.5				156.6	159.5	211.2	236.5	229.9	257.2	96.7	81.3	54.5	113.2	103.7	349.3	347.4	424.7	365.5	433.6	342.4	110.9	100.3	74.2				167.2	139.6	147.2	112.1	91.7	160.7	111.9	162.3	108.5
A0A287QGL6	114.3	179.5	133.7	91.3	102.6	44.4	44.1	217.3	237.5	92.1	76.8	107.4	109.7	84.7	77.4	51.2	83.9	178.8	224	202.5	89.4	98.3	79.2	42.5	66.1	46.3	119.1	124.6	37.9	28	32.5	108.8	130	151.4	47.3	50.4	56.6	128.7	94.1	77.4	74.3	74.9	69.8	96.9	119	106.6	92.3	99.6	139.2
A0A287XXU1	139	70.7	195	89.7	50.8	103.8	75.7	35.4	48.3	34.2	27.5	81.7	63.6	89.8	11.6	113.9	13	143.6	48.5	69	351.5	72.4	19	217.6	42	239.5	83.2	55.7	84.7	50.8	128.8	129.2	21.5	37.4	102.6	63.1	77.3	191	212.6	188.3	120.5	167.6	31.4	199.7	52.8	136.9	485.3	127.4	200.7
A0A287XM93
A0A287FX80	150.6	203.2	213.4	119.4	129.9	174.2	173	122.4	119.4												273.7	266.4	215	225.8	197.8	151.8						278.7	283.1	305.4	91.9	149.2	156.9	89.2	140.9	141				187.3	107.7	205.4	275	162.3	289
F2DY13	51.3	64.8	46.4	28.6	29.7	21.1	15.1	104.1	116.4	75.7	82.2	99	62	54.2	101.9	65	63.8	46	39.3	51.4	73.7	87.2	87.8	74.9	64.6	75.6	73.2	86.9	27.9	28.8	41	90.4	75.2	85.3	57.5	65.3	64.5	118.7	137.8	98.5	82.3	67.3	84.3	62.8	92.9	39.4	71	68.9	83.1
F2DBD1	101.7	118.7	81.7	130.9	105	108	129.1	106.5	117.7	94.8	112.9	135.7	133.9	126.1	47.5	51.5	53.8	80.1	178.9	60.7	108.7	81.7	94.2	78.9	71.4	70.4	85.7	88.6	92	74.2	116.5	120.6	106.7	123.2	74.3	64.2	74.7	76.6	115.2	127.3	131.8	137.1	141.4	82.9	139.8	104.8	83.1	70.2	108.3
A0A287T5W3						349.7	663.1			340.4	373.3													236.9	495.1	151.5	402.7	388	453.5	312.1	197.4	303.1	198.3	223.8													304.9	261.8	279.8
F2E986	212.6	269.7	239.1			151.1	161.7	218.3	192.7									339.9	396.3	449.9									220.8	178.5	219.9	34.4	114.8	104				221.5	210.2	167.9							157.9	307.5	361.6
F2DIH1	27.8	25.3	39.6	32.2	32.5	24.8	25.5	150.4	115.2	45	54.8	42.9	68.4	38.7	16.5	17.5	39.2	126.1	162.1	144.6	24.1	48.6	18.9	15.2	21.9	25	80.6	69.4	190.2	242	195.5	162.8	198.3	147.9	28.8	22	34.8	210.8	143.1	145.8	144.3	148.1	74.1	190.5	208.5	193.5	21.6	28.5	40.7
F2D017	63.5	155.9	145.1	45.6	112.5	30.2	52.6	39.6	34.6	36.9	35.1	88.6	51.7	53.1	74.8	66.5	71.6	56.5	41.8	26.8	88.4	63.9	41.7	36	38.7	27.9	45.4	156.2	52.1	57.2	34.5	43.1	33.5	112.9	29.9	28.5	23.2	67	165.5	66.4	109.5	137.5	69.4	39.6	60.8	72.8	70.1	55.8	47.5
F2D9S4												32.2	38.4	19.6				78.9	70.7	52.2									50.8	35.3	42.9							47.8	33.9	57.6	14.5	13.2	9.9	40.2	35.4	43.5	38.4	37	40.4
F2DMI1	53.1	59.8	44.5	90.6	77.7	37.4	32.2	39.5	33.6	46.7	31.6	55.7	78.2	66.6	146.2	110.8	139.1	93	102.5	64.9	63.4	72	73.2	51.8	60.9	54.5	41.7	45.2	81.2	94	76.5	153.6	139.2	155.6	89.4	80.1	85.1	188.1	156.1	181.5	209.9	148.9	305.5				114.5	111.8	111.7
A0A287F006	161.6	268.8	77.3	95.2	277.7	143.9	105.4	133.8	162	108.4	102.3	188.3	110.2	159	91.7	87.6	90.5	259.5	83.3	146.7	84.3	122.2	155.2	45.1	100.8	53.3	84.2	56.4	62.5	107.9	61.1	60.7	75.3	765.4	101.8	89.5	101.7	80.6	54.5	48.2	129.6	132.8	117.2	51.4	151.2	115.7	42.5	49.6	43.7
F2D675	168.5	209.5	139.6	95.7	193.9	296.5	254.5	148.8	157.5	209.5	175.2	164.1	167.2	280	147.9	249.7	178.1	154.7	131.3	149.4	142	111.6	147.1	178.1	234	174.3	211.4	260.6	242.1	252.6	281.4				23	31.1	23.7	30.7	32.6	24.5	220.3	188	203.5	33	25.4	32	28	26.4	23.8
M0UEI5	69.7	83.1	83.1	82.4	86.2	137.8	78.4	100.3	74.9	62.8	105.1	44.6	65.3	61.9	51.7	58.4	34.6	72.6	122.1	61	169.2	85	94.4	176.2	83.2	92.4	106	104	71.2	147.4	127.5	77.9	90.2	161.1	49.9	107.3	92.8	60.3	69.2	81.7	70.5	98.6	43	181.5	29.1	111.9	68.9	172.1	68.3
A0A287KCZ1	166.2	222.7	171.7			116.2	117											257.7	303.7	180.7	193.1	164.1	140.5												104.6	82.3	96				39.5	56.2	29.1	160.1	90.8	125.3	148.3	196	160.4
A0A287LJX5
Q9SME4	109.7	160.1	81.4	112.5	66.3	41	40.2	99.6	132.1	87.8	75.1	69	101.4	39.5	148.7	64.7	76.8	122.1	90	50.5	56.1	72.9	69.8	34.7	46.8	36.8	63.2	82.2	83	99.2	80	63	108.3	134.4	49.2	43.8	55.5	136.9	82.8	86.9	72.8	87.3	61.2	72.3	28.8	38.7	35	74.6	77.6
F2DBE0	151.7	127	114.6	55.8	50.3	93.8	71.2	20.8	20.7						30.7	29.7	37.3	20.4	14.6	20	261.8	205.6	307	180.5	154	161.7			48.9	57.1	96.7	120.2	65.7	34.8	80.4	96.2	80.3	107.4	112.5	87.7	65.7	85	82.8	159.8	113.1	97.7	263.1	183.6	228.3
F2CT30	334.1	171.4	121.9	141.8	137.2	349.6	247.4			44.9	42.9	525.3	516.9	643.2				153.4	222.8	193.7	14.7	18.9	18.4	250.2	215.7	264.6	52.5	44.1	218.6	179.7	277.5	66.3	56.6	61.3	205.7	148.1	174.7	249.8	135.7	273.2	109.5	118.4	100.2	165.9	174	170.4	103	84.7	106.7
A0A287KEJ7	130.6	95.3	48.5	92	94.1	85.9	96.5	127.6	143.5	49.4	51.6	126.1	57.4	83.4	47.6	80	63.7	66.1	83.2	71.9	76.6	62.3	48.1	52	47	79	115.4	131.7	39.6	83.7	93.1	72.6	87.1	148.6	71.5	67.7	65.7	79.6	191.3	107.8	99.3	113.7	87.4	68	110	66.8	116.8	76	160.5
A0A287SMK1
M0V1W1	65.6	121.7	55.5	147.6	176	138.1	89.3	78.7	86.5	243.9	172.4	82	71.6	83.8	81.9	119.6	111.3	122.2	151	130.9	43.1	79.8	122.7	96.4	116.6	49.5	117.9	119.2	126.6	88.4	94.7	62.7	109.6	158.9	112.1	81.1	133.2	73.8	43.4	84.2	80.5	66	208.3	77.7	385.3	78.2	58	94.2	77.6
F2DXJ9																													174	130.6	261	172.6	225.1	147.5										161.4	244.5	140.5	113.2	175.2	179.8
A0A287IBY7	106.8	124.6	104.5	28.2	67.8			89.2	85.6			46.6	51.4	21.7	45.1	32.2	39.9	123.1	227	135	44.9	31	32.1	25.8	48.8	30.5	77.8	77.2	144	88.3	134	115.3	175.7	147.4	32.1	25.2	11.3	146.8	121.7	114.3	105.7	150.4	66	87	80	67.7	100.7	80.7	93.6
A0A287LTR2	98.9	108.4	51.6	112.7	106.2	39.2	46.2	93.3	73.6	99.5	66.4	46.6	28.1	48.8	128.2	74.5	110.7	44.2	89.8	43.7	117.8	52.8	125.7	23.7	46.4	10.8	40.5	48.6	64.2	70.2	61.8	69.9	89.5	62.4	80	173.9	87.7	65.5	28.4	90.9	199.5	121.7	192.9	93.3	132.7	104.5	54.4	52.4	86.8
A0A287WJT2	232.7	282.3	196.4			180.2	182								133.3	91.1	88.1				352.9	345.2	479.8	172	144.4	127.6			95.3	57.9	116.1	79.4	118.1	85	122.5	105.8	105.6	129.7	156.8	172.7	70	61.6	69.2	192.6	176.6	127	378	283	445.1
A1E9M6	155.5	70	146.6	110.9	61	156.5	119.6	73.6	45.7	65.6	66.2	83.3	74.9	54.8	45.3	51.6	63	92	88.7	70.2	192.5	96.5	218.2	167.9	48.3	140.9	118.4	94.2	102.1	49.1	224.2	213.3	43.4	123.3	121.2	146.1	236.4	138.2	81.6	159.1	106.5	93.7	82.3	181.9	154.3	131.9	340.6	235.6	134.5
A0A287P154	149.5	119.7	104.1	164.4	117	87.1	80			66.5	21	69.2	71.7	75.9	141.4	101.3	70.2	60.5	37.2	48.6	188.6	60.9	134.2	82.2	97.6	104.5	54.4	57.1	50.1	42.4	126.7	143.5	168.1	142.4	69.5	63.5	89.8	105.3	142.4	128.3	127.5	145.1	150.9	178.5	146.1	75.7	224.4	179.3	157.9
A0A287QVX5	40.7	56.8	44.7	82.3	78.4	84.8	60					75.7	69.5	53.9	84.1	80.1	63.6	76	77.4	68.8	355.4	86	185.3	144.5	123.6	133			70	97.7	93.2	150.8	108.4	51.1	91.2	85.8	81.9	72.4	83.8	61.1	76.7	76.7	48.1	139.6	82.8	98.1	296.6	152.4	396.4
F2EFK9	170.6	159.1	105.5	100.3	109.5	40	42.7	79.6	93.8	81.4	62.1	102	66.2	79.2	96.5	106.9	80.7	91.3	196.5	131.9	62.6	82	73.2	100.3	76.7	58.3	92.5	79.1	31.8	38.1	52.8	91.4	105.3	92.2	86.9	80.6	144.6	124.9	151.6	112.1	126.8	146.2	114.3	71.4	132.2	93.2	65.2	79.7	144.4
F2DJP3
A0A287K0Y8																													130.7	127	136.2													206.6	200.9	300.5
A0A287FKI5	29	24	18.4					361.5	198.4			51.5	63.9	55.8	167.2	128.6	130				28.7	38.1	30.2				485	241.5	48.8	58.2	24.1				120.5	133.2	174.2	61.9	57.8	52.9							311.5	328	557.9
A0A287PMF6	141.5	151.6	110.6	62.9	44.5	109.7	84.2	72.9	59.4	41.9	49	78.9	61.6	84.3	139.3	130.2	113	129.4	102.5	146.8	175.4	70.1	119.8	232.6	126.2	146.1	49.4	27.3	149.2	191.5	147.3	108.1	44.1	45.6	98.6	119.4	89.1	34.4	39.1	50.9	93.2	71.8	86.3	157.3	153.4	121.7	225.6	150.8	94.6
F2EJZ0	87.8	44.6	54.6	111.6	83.9	70.7	199.5	52.3	130.4	70.5	60.3	85.8	75.3	92.8	61.1	105.5	70.2	92.6	87.1	82.5	253.4	92.1	109	164.5	57.6	145.6	112.2	143.6	137.4	73.2	135.3	56.7	70.4	48.8	108.1	99.8	97.5	76.8	121.8	97.9	84.6	103.5	120	106.5	111.5	132.9	132	79	117.7
F2DGI9	60.5	73.8	83.9	73.5	89.5	38.1	36.1	54.4	118.2	77.3	70.6	67.5	66.7	84.7	149.4	106.4	90.3	138.2	92	122.3	192.9	112.5	87.3	100.9	96.4	87.8	73.6	98.6	106	69.2	123.1	93.1	125.9	110.5	127.4	93.1	79	162.9	161	207.7	141.9	107.4	86.9	122.5	92.1	74.8	125.6	118.2	61.3
A0A287U813	95.1	137	120	98	120.5			132.7	143.8	105.1	97.8	185.9	105.5	132.7	121.3	103.2	122.5	97.8	135.1	101	38.3	23.7	33.6	106.3	107	111.8	166.9	185.8	233.8	124.1	155.5	50.2	49.9	46.6	68	71.6	92.5	48.8	65	32.5	32.5	47	26.8	96.2	161.8	192.7	90.7	119.3	105.9
F2CZL7	115.7	190	136.4	178.7	223.6	90.4	125	165.4	96.6	160.6	171.9	106.7	112.2	79.2	88.8	82.2	82	144.2	93.8	165	116.6	201.3	168.2	92.6	141.4	122.6	135.3	152.4	92.8	149.7	63.5	70.3	112.1	154.9	68.2	61.4	96.9	107.9	81.3	75.1	138.3	91	148.5	54.4	120.1	78.3	50.7	76.3	83.4
A0A287J4F3				58.1	48			58.5	66.3			159.2	99.6	112	172.9	164.6	112.2	133.9	170.5	115.1	186.5	177	210.8				135.8	177.8	193.9	154.9	196.7										129.2	165.7	163	53.9	54.3	55.1	93.3	71.6	49.8
F2CS52	77.9	177	113	163.8	135.1	70.3	159.5	126.6	211.2	102.3	217.1	53.4	58.9	87.5	175.7	92.7	122.5	114.8	99.6	79.9	98.8	171.6	207.6	55.6	134.2	82	97.6	94.5	126.6	110.7	82	60.8	80.1	135	100.9	186.5	154.7	98	76.3	88.7	97.9	90.2	129	131.9	111.1	110.4	117.1	87.9	122.9
F2CQN1	71.9	33.8	83.6	84.5	95.1	141.3	137.5	101.6	148.8	115.7	92.4	105.9	75.1	172.8	73.3	77.3	107.6	119	163.3	143.7	108.7	129.3	86.1	66.2	67.6	73.6	99.5	116.5	144.4	66.9	75.2	95.3	125.4	126.4	63.9	57.6	70.1	112.2	76	95.7	81.1	107.6	116	95.1	116.9	81.8	91.3	89.5	111.2
A0A287VZQ8	288.5	206.6	192.8	298.1	155.3							162.6	151.7	126	133	67.5	131.6	236.5	152.9	112.5	108.6	155.8	183	131.2	160.5	118.5			131.3	134.5	142.7	200	343.4	309.1	154.9	251.1	172							99.7	98.8	111.8
A0A287FIQ8	133.7	97.7	79.4	88.1	65.4			102.8	105.7	110	74	57.7	65	59.1	91.1	72.2	88.4	108	147.9	76.3	44	21.4	39.3	74	75.6	58.6	77.2	67.7	27.5	29.3	31.8	66	73.3	78.2	30.7	24	26.1	129.6	157	211.7	108.5	137.3	92.9	46	38.5	38.8	62.1	84.8	91.9
A0A287EDX0	101	192.2	200.4	281.3	291.9	77.8	63.6	239.2	345.1	168.1	174.9	223.5	245.1	187.6	79.7	132.8	112.6	207.6	355.2	267.6				57.5	59.4	47.4	72.5	66.7	175.4	177.1	130.1	308.1	257.6	298.4	241.8	347.9	304				206.3	189.5	302.4				57.3	101.1	118.8
F2CQF1	161.8	192.7	136.5	49.6	61.8			83.3	102.2			103.7	98.1	131				113.3	162	128	102.2	87.1	128.6				95.6	95	39.8	54.2	37.7	66.5	132.2	50.6	47	56.8	47.8	236.2	246.3	162.6	275.9	440.4	375	76.7	66.1	49.3	116.5	60.6	142.1
A0A287SBZ3	66.6	101	51.4	80.7	104.7	78.2	171.9	100.8	115.8	228.7	210.8	79.2	93.6	103.3	103.8	185.8	221.2	99.5	92.4	109.5	108	87.2	125.2	127	276.8	122.9	86.4	183.1	156.1	87.9	68.7	89.9	96.7	83.1	117.9	90	56.8	103.1	118	62.1	62.5	105.7	129.5	47.3	111.6	75.5	60.8	67.7	105.8
M0WUF3	296.1	245.5	169.8	121.5	124.7	23.7	32.8	114.1	108.1	107.3	117	95.1	76.5	106.1	139.4	120.3	109.7	109.3	105	123.6	59.2	58.3	71.8	45	61	35.8	68.1	67.1				38.9	32.7	26.7	65.8	70.8	59.4	250.4	173.4	212.3	125.7	111	151.5	35.6	45.1	35.9	19.8	23.1	39.4
A0A287KPT6
M0W1G3	76	98.7	118	187.1	85	52.7	131.9	38.7	88.5	118.2	119.4	63.5	77.5	80.7	124	132	101.1	108.7	116.5	127.4	120.4	120.6	187.2	76	83.7	94.2	48.9	35.8	78.3	98.5	100.3	40.1	33.8	106.3	51.6	63.4	68.8	123	184.4	78.8	237.9	223.2	143.8	207.8	144.3	194.7	258.5	340.3	325.9
A0A287V200	162.5	113.7	114.4	144.8	93.5	90.3	110.1	54.1	49.9	67	108.1	159.3	213.3	152.6	133.1	84.7	99.6	95.2	86.7	65.4	167.7	117.7	177.9	109.2	86.3	102.8	50.2	89.5	104.7	113.1	108.5	100.2	143.9	161.5	135.9	72.5	179	98.9	110.4	132.6	100.2	91.2	74.5	41.7	73.2	64	63.9	50.5	60.7
F2DDR0	53.6	122.4	105	79.2	49.1	155.4	189	262.4	220	149.4	139.9				77.5	98.5	105.3	51.7	95.7	80.2	130	120.1	237.1	124.3	122.2	208.7	402.2	371.7				30.8	33.4	35.5	66.7	66.8	42.5	105.2	105.6	92.7	36.4	53.9	68.4	73.2	86.4	56.1	27.8	56.7	42.9
M0XIA3	120.4	92.7	83.5	37.5	23.5	58.6	47.4	86.4	56.6	119.8	134.3	58	45.3	31	124.4	149.4	158.4	228.8	243.8	174.3	28.2	23.9	30.6	87.3	118.9	112.1	85.4	93.3	100.6	112.9	132.8	183.8	128.2	198.7	33	37.6	36.9	28.8	79.1	34.2	108.4	91.5	96.7	95.2	182.4	153.1	75.4	105.1	114.5
A0A287NUN2	88.4	54.8	65.3			27.8	21.7								69	59	99.3	62.7	76.3	80.8				66.7	35.1	92.6	87.1	95.1	28.7	96.5	297.1	78	89.2	97.8	86.8	89	96.1	167.3	131.7	73.8				202.9	102.8	87.4	96.8	154.2	148.6
F2E8F5	87.5	58.9	81.4	88.8	78			136	125.1	95.1	108.9	96.5	106.3	86	164.9	99.8	73.5	80.3	123.5	108.5	172.1	114.2	156.4	71.4	60.3	56	90.7	91.5				95.9	147.8	110	122	128.9	80.7	143.5	85	144.4	154.2	140.8	167.6
M0UFX2	130.4	89	176.7	117.3	96.4	95.5	79.7	25	39.6	67.4	56.6	35.7	35.1	37.8	127.5	111.6	94.8	74.9	140.5	156.9	177.2	133.7	171.3	107.5	103.9	98.8	81.9	95.9	66.7	83	119.4	123.3	124.4	136	72.3	122.3	95.2	118	113.7	151.2	101.7	90.7	71.4	85.6	91.7	120.2	72.8	53.8	42.2
F2DBC0																		1239.8	1973.3	393.6
A0A287P2R3	69.2	53.6	61.4	85.4	78.4	58	121								67.1	60.6	68.6				382.4	222.3	331.4	158.8	136	197.8	79.4	68	81.6	73.7	73.9	79.1	46.9	61.1	65.3	114.5	69.9	143.7	173.3	204.7	68.6	75.1	91.3	152	137.6	121.1	363.8	333.4	379.2
M0X6B0						58.1	74																									52	45.6	45.6							65	63.5	58.1	69.7	63	75.4
A0A287PUS9	66.2	101.2	38.1					45.8	42.7			47.4	39.2	74.7	75.9	76.6	98.5	141.5	41.2	38.7							57.1	42.6	72.8	67.4	84.9	26.2	35.4	45.5				106.9	160.5	72.4	103.4	134.9	136.5	48.8	50.4	31.9	91.9	111.5	97.3
A0A287WJL1	154.3	79.5	81.5	96.1	88.7			104.7	124.4			99.4	135.2	107	98	52.9	109.1	93.3	169	145.4	77.8	75	108	47	43.1	38.5			61.7	64.1	76.8	155	161	97.3				83.1	91.6	136	112.5	180	112.6	75.7	141.1	84.9	68	73.1	129.8
A0A287HTX4	77.3	85.3	60.3	121.7	85.8	253	246	74.1	80.6	42.5	83.8	185.1	211.1	219.4	79.9	64.8	57	33.5	66.8	74.1	47.9	67	218	16.7	15.1	15.1	45.2	78.7	124.1	139.4	144.7	152.1	160.8	113.4	121.3	87	142.3	209.8	122.7	212.6	195.7	118.9	163.9	21.8	30.4	43.7
A0A287HP97	35.1	91.5	138.5	70.7	85.5			57.1	190	63.4	142.1	65.7	55.3	50.1	86.3	99	48.3	52.7	62.1	67.6	138.3	69.2	30	204.9	123.5	326.3	111.8	166	22.4	47	47	20.3	60	136	130.8	207	220.7	136.2	342.5	43	110.3	91.9	102.3	78	76.4	73.6	112	138.6	70.1
A0A287ULF4	73.2	145.9	86	144.3	126.9	79.4	112.9	64.6	96	113.7	96.6	97.5	93.2	81.6	141.2	76.7	81.2	73.4	64.3	73.9	117.3	89.3	108.2	79.8	75.9	87.4	87.7	99	72.5	60.9	60.4	70.6	67.1	79.3	77.7	95.7	94.3	69.1	138	58.1	59.7	102.8	76.7	78.5	68.4	89.2	102.4	79.1	106
A0A287FC58	58.4	152.8	88.3	114.9	133.6	75.9	77.5	107.9	92.5	117.1	107.6	125.1	89	89.1	156.4	132.5	131.9	102.8	77.9	100.7	69.1	97.8	115.5	66	108.4	83.1	90.9	90.8	84.7	138.6	82.7	63.7	82.9	91.2	94.6	95.4	82.2	125.3	56.7	104.1	102.2	56.4	122.9	62.5	82.4	52.8	36.7	60.5	63.9
M0UUA6				123.8	129
A0A287K2D3	92.5	104.5	70.4	181.1	68.8	69.7	76.4	71.1	98	87.4	82.1	150.5	126.3	65.6	196.8	48	37.6	45.9	32.4	55.2	64.1	153.5	39.6	41.6	34	54.6	44.3	57	61.3	41.9	64.6	109.3	163.4	84.8	50.2	59.5	135	61.6	34	140.7	88.3	65.3	68.1	81.1	25.1	51.9	85.5	86.3	82.2
A0A287PUW7	123.7	174.3	96.1	92.7	94.9	63.5	57.7	82.2	196.6	60.4	19.1	121.8	141.1	158.8	196	197.3	247.2	176.6	67.4	82.3	38.4	25.7	24.5	103.8	128.1	106.7	115.4	106.9	80.7	73.2	69.1	69.6	75.2	62.8	204.5	110.2	57.4	97.9	98.9	58.1	65.5	71.5	58.3	88.3	136.6	141.2	83.3	74.3	86
A0A287KNX3						445.4	370.6								219.9	230.3	227	277.7	370.9	286.8				463.2	639.1	521.8			359.6	310.6	513.8				304.5	287.5	282.2							821.1	550.1	666.4
A0A287Q514	1027	55.8	51.5	103.3	42.3							123.2	90.2	53.6	86.7	116.3	92.5	113.4	178.7	327.8				29.1	41.7	27	234.8	299.1	145.2	139.1	171.8	195.5	170.4	147.4	80.9	66.6	76.5	393.5	294.2	294.7	47.9	52.3	46.6	101.3	131	109.3	116.6	71.2	117.3
A0A287NVQ0	264.6	265	279.5																		694.2	572.3	792.1	397	346.7	358.8									391.3	380.2	261
A0A287G0Z3	137.8	88.4	86	37.6	32.9			88.9	118.6	43.7	29.2	155.7	123.2	112.2	130.4	86.9	83.9	125.5	154.6	123.4	80.9	61.8	62.4	29.7	53.8	53.9	90.5	130.1	32.4	30.5	60.9	81	67.1	54.2	30.1	39.2	27.3	184.7	144.8	126.8	88.2	95.8	87.6	86.9	109.5	97.6	87.9	79.6	137.8
F2EDI2	359.3	347.5	307.4					253.4	290.8			281.5	229.1	268.2																		252.7	211.3	130.2				207.2	226.8	217.3	124.3	147.3	133.9
F2CW48	116.1	94.7	34.4	110.6	103.8	69.7	99.5	82.8	91.6	86.7	118.6	101.9	68.8	102.6	91.3	60.3	89	131.3	143	46	112.2	101.7	104.3	55	92.1	38.1	44.2	94.8	131.6	73.6	102.4	127.2	113.7	124.9	38.1	110	41.3	135.6	53.1	69.1	61.2	92.5	103.8	69.1	100.1	100.1	96.4	67.9	92.5
A0A287H8R8	66.2	148.6	69.7	96.7	119.7	80.2	153.8	91.1	129.5	111.1	92	63.2	107.9	78.5	103.4	136.4	93.5	101.6	41.9	49.5	266.3	125.4	224.3	212.7	104.4	154.9	78.9	150.4	89.9	101.2	99.4	100.1	74.6	65.9	40.2	52	33.9	95	79.2	77.7	70.8	80.5	101.7	89.8	64.9	91.5	164.6	95.8	98.5
A0A287HEP6	86.8	88.4	101			42.4	103.4	101.9	93.9	38.6	37.5	181	414.8	123.9	67.9	34.1	37.5	37.8	92	69.1	62.5	68.8	69.5				47.2	62.8	97.4	110.3	40.9	108.7	96	228.1	134.4	66.8	172.5	58.4	57.7	60.9				62.4	70.4	87.4	59.3	51.2	61.3
A0A287T216
A0A287HSC7																					350.9	241.4	268.5	218.1	194.8	188.3															168.1	214.6	177.3				520.1	593.9	585.3
A0A287T700	108.8	74.1	79.4	58.3	55	216.4	259.6	214.2	156.4			49.4	56.7	49.8	204.1	170.4	195.3	160	304.8	275.6	113.5	120.1	132.9	32.4	35.8	39	212.1	222.3	95.1	128.1	160.6	161.2	99.5	121.5	163.8	222.3	116.7	66.9	104.2	69.7	216.1	145.7	115.6	196.7	172.4	178	99.2	32.6	38.5
A0A287J5V4	59.7	66	93.6	9.5	9.2	139.9	1333.4	127	49.6	10	7.7	51.4	42.9	45.1	55.8	44.8	37.8	47.4	47.5	62.3	39.4	99.4	22.6	37.7	46.6	34.2	63.3	67.2	15.6	6.7	18	8.6	8.9	31.4	38.1	39.7	62.7	140.5	106.5	138.8	47.8	101.1	51.2	158.8	173.9	157.4	117.7	65.5	110.6
F2CWP9	83.3	91.7	24.1	99.7	106			87.5	96.2			144.1	85.6	123.6	73.1	75	57.6	116.1	116.4	111	116.8	148.5	62	41.1	66.7	40.8	79.7	45.4	33.6	19.6	26.5	164.6	76.8	122.9	81.8	99	100.7	106.7	87	131.8	83.2	186.8	112.4	88.9	91	72.3	55.4	52.7	60
A0A287HJF8	166.2	120.9	89.4			77.2	76.3			63.8	66.2	119	149.8	129.3	46.8	53.5	46	83.6	89	67.9							45.8	44	82.8	104.7	89.7	137.6	147.4	161.3				165	116.8	142.1	122.9	102.9	88	133.1	125.5	115.9	96.2	101.7	173.9
A0A287M8N8	138.3	113.4	123	31.9	30.9					29.3	24.7	49.5	37.3	66.7				114.7	123.7	80.4	80.7	67	59.2	49.6	51.7	38.7	44.2	37.9	86.8	77.1	88.6	143.1	127.1	96.8				156.8	133.4	114.8	80	104.7	84.7	133.4	137.8	160.3	104	47.7	67.2
Q9SDM1																													332.6	812.1	744.7													543.1	369.6	541.3	718.3	352.3	953.8
F2D620	84.6	117.5	60.3	82.3	138.6	63.9	77.3	90.1	75.1	91.8	64	82.7	108.2	85.7	123.1	135.2	103.9	90.9	101.7	86.4	31.5	63.2	71.1	55.4	52.9	84.9	78.3	80	47.6	73	20.3	77.2	106.8	121.1	87.7	104.1	85.2	135.5	137.1	85.8	100.3	138	93.2	81.6	124.2	95.2	88.6	143.4	183.4
M0ZDL4	125	147	137.9	137.3	127	95.3	95.7	105.4	114	119.1	101.7	143.1	146.4	145	189.2	121.9	107.6	110.9	123.4	124.3	246.6	177.5	266.1	96.1	84.4	97.7	143.5	142.6	45.1	45	37.9	102.8	133	133.6	154.6	145.8	151.6	165.6	46.5	56.5	110.3	77	189.9	89.6	114.6	75.3	78.6	91.6	76
A0A287PRJ1				234.5	225.6	129.3	188.6			80	153.2				852.1	64.3	87.7																		434.2	479	436.8
A0A287ETV5	139.3	228.7	110.2	82.2	141.9	45.6	144.4	89	176.6	200.6	138.7	102.7	66.4	121.6	141.1	217.8	151.3	146.5	47.9	70.8	144.2	73.7	67	118.2	149.2	123.2	84.3	125.7	134.7	140.9	106.9	103.7	116.6	115.1	113.1	128.8	115.8	41.1	37.5	37.6	153.9	86.9	132.4	73.6	72.2	65.9	216.9	240	267.3
F2DI46
A0A287ISH2	105.7	156.8	90.7	101.5	118.1	69.9	73.5	123.8	116.7	160	100.2	71.9	73.2	65.2	36	69	70.1	66.4	57.4	49.5	129.4	73.8	132.9	80.1	69	55.3	92.2	100.7	77	128.1	102.7	84.2	79.6	58.3	57.3	53.3	73.9	54.1	101.9	95.3	139.4	194.5	208.7	78.7	50	99.5	83.7	62.4	144.3
F2CWX5	106.1	116.3	107.9					98.7	108.3			124.1	94	140.7	44.7	43.8	45.8							111.6	102.4	115.8	80.9	86				112	106	83.7							182.5	174	176.3				1258.7	386.8	676.6
M0YA23	95.4	100	115.1	106.9	103.7	95.3	70.3	93.6	105.7	43.8	61	105.5	111	108.4	76.8	98.6	42.2	74.3	77.6	60.7	104.2	161.1	162.1	90.4	103.4	130.1	167	148.9	101.9	130.5	76.6	112.2	171.9	101.8	53.7	41	45.8	144.2	78.2	111.5	43.3	47.3	61.5	112.3	124.4	70.8	63.8	84	77.4
F2DUY9	67.5	168.7	120.2	71.1	190.4	61	160.6	112.4	134.2	151.5	146.6	148.2	129.7	108.9	135.3	118	148.7	71.3	92.5	77.2	101.2	133.9	76.3	44.9	111.3	74.5	68.6	111	138.3	74.4	77.4	83.1	88.7	100.1	75.8	151.7	72.8	120.8	79.8	81.9	125.8	144	195.8	57.2	132	92.1	80.7	96.2	140.8
A0A287PDR0	164.7	242.7	319.5	158.1	206.9	133	123.6	134.8	91.8	46.8	50.6	182.7	266.5	61.8	56.8	27.8	90.5	38.6	92	141.7	154.3	434	176.9	54.1	35.7	177.7	126.9	115.6	100	207.7	161.8	57.8	188.8	116.6	124.8	48.2	177.3	118.3	177.2	196.8	159.4	75.2	95.8	143.3	98.9	23.8	107	25.1	56.1
F2DST6	259.8	301.6	187.7	38.9	99.8	73.8	87.7	123.7	125			212.1	24.6	123.8	79.3	69.9	57.1				53.2	43.9	55.3	80.1	95.5	44.2	48.7	49.3	131.4	102.5	67.8	124.5	110.8	121.8	49.5	35.2	34.4	44.2	176	54.1	30.7	128.8	60.4	117.1	76.5	106.3	25.6	69.5	69.7
A0A287HAC0						168.3	151.7					164.3	142.8	116.6										228.8	193	244.6	278.9	143.9	161.4	126.5	115.4							78.7	111.5	139.2	204.7	140.1	207.8	59.7	64.1	60.6	202.1	92.8	158.1
A0A287E500								176.2	145.4			164.4	176.3	149.2	251.9	80.6	176.1				285.7	272.4	258.6						155	202.3	144.9	315.1	304	614.7				148.9	187.5	240.5	414.2	367.2	337.9	138.9	156.2	139.5
A0A287SNS2	37	64	31.9	33.7	63			41.3	34.4	44.2	50.1				363.3	209.8	392.8	41.1	41	36.1	53.6	29	57.3	143.7	194.9	143.5						25.2	35.5	18.7	42.9	37.9	40.3				31.5	50	26.7				62	68.3	42.9
Q8LKZ4	185.9	236	183.5	215.5	203.1													396.6	340	346.2															188	196.1	222.8	737.1	664.8	679.8	104.3	153.9	178.7				174.1	163.9	192.7
A0A287X019	157.4	117.5	131.7					161.1	153.4			112.2	122.8	128.2				87	103	88.5									150.5	115.3	88.7	161.8	137.3	290.6				111.7	86.8	72.7	58.9	90.1	69.3	110.9	140.9	191.6	233.3	219.7	219.4
A0A287EWW0	69.6	190	81.4	229	180.6	178.6	203.1	91.5	103.4	183.6	180.8	57.3	91.2	201.3	221.9	184	124.2	204.9	95.2	72.3	130.6	159.3	229.3	144	116.3	84.6	204.7	226.9				55.5	58.1	62.6	128.4	123.5	138	169.1	72.3	132.6	123.1	33.3	186.8				78.4	72.5	70.8
A0A287UH00	205.3	204.4	186.3															177.5	148.2	160.4	258.1	149.8	177.8	124.5	129	124.2	162.3	174.2							125.2	140.8	159.6	197.3	137.5	166.2				343.3	120.6	156.1	246.4	151.9	80.3
F2EHA8	22	155.3	59.1	206.3	72.1	117.2	221.5	224.6	189.4	236.3	301.9	104.2	77.1	63.3	131.7	128.4	83.4	47.2	32.4	43.1	42.6	123.9	100.4	159.1	160.5	67.2	248.1	245.5	129.2	143.5	79.4	58.8	124.8	227.7	93	146.5	189.2	45	80.9	82.6	114.1	86.7	74	57	116.2	75.9	140.1	86.5	197.9
A0A287INY8	197.6	176.8	149.1	113.3	176.1	23.7	23.5	89.1	121.2	119.9	134	58.8	71.4	29.9	137.8	168.3	175.1	117.5	121.4	139.6	78.5	134.2	111.8				188.1	157.2	75.7	81	50.8	143.6	110.7	161	32.7	24	30.5	176	195.4	184.1	130.1	131.1	160.4	83.4	96.1	82.8	28.7	33.5	49.3
A0A287RFP2				44	47.8	59.2	52.1	98.6	109.6	70.2	78.8	99.3	92.3	120.3				110.3	54.9	55.3				142.7	216.9	192.9	126.5	142.4				132.9	100.5	137.5	55.3	69.5	67.3	59.9	68.3	39.9	52.9	40.7	44.3	103.3	104.7	97.4	37.5	37.7	37.4
F2EJV2								149.7	167.5	44.3	48.1	190.8	150.2	137.4	119.3	186.8	126.9	212.8	173.6	178.7	234.2	87.9	184.3	51	115.1	155.7						117.3	163	169	46.7	39.2	35.2	111.5	149.3	101.2	55.5	61.5	77.3	37.6	34	33.3	130.8	188.6	121.3
A0A287WQR6	17.5	16.6	19.7			136.8	126.6					161.9	101	114.4	62.9	73.8	112.1	252.3	251.7	231.8	31.4	27.8	25.7	64.3	96.8	61	126.2	117.2	225.4	98.7	233.4	202.9	385.7	89.9	68.5	117.9	101.1	36.9	72.3	40.4	73.6	67.2	73.1	76.6	40.1	61.2	122.9	83.7	157
A0A287QPI2	84.2	84	111	67.9	70.5	93.9	53	92.8	92.3						120.2	208.5	86.9	43.3	45.6	62.8	41	43.4	27.3				107	84.2				59.6	57.9	28.2				150.7	159.6	38.1	98.3	106.2	42.9	55.6	101.9	77.7	120.7	188	198.2
A0A287GHX1	265.9	246.1	131.9	115.8	100.7					441	189.5	106.3	144.1	101.2	96.9	264.9	239.1	204.6	211.3	170	102.8	33.5	124	82	63.9	78.6	180.5	131.1	421	329.9	43.7							37.5	48.3	47.9	69.2	48.7	64.6
A0A287L862	46	48.4	64.5			205.2	203.6	162.2	125.9			57.4	42	45.1	48.8	39.2	43.3	195.7	177.4	186.2				90.2	91.1	99.1	143.1	136.3	36.6	33.3	38.4	278.3	198.8	60.4	151.5	142.3	144.9	81.8	148.9	142.1				278.8	348.8	250.6
A0A287E0K2	150.3	131	109.3	274.1	134.1	139.2	187.2	88.1	114.9			216.1	182.3	268	247.5	236.6	119.5	204.1	200	222.1	665.3	141.4	132.5	327.6	87.5	232.6	110.6	152.3	101.5	106	97.9				174.3	323.8	310.3										162.8	86.4	123
F2DF91	86.6	134.7	96.2	214.9	113.4	100.9	229	122.7	169.3	170.7	142.9	123.8	72.1	62.7	157.8	111.4	145.8	58.5	126.1	57.8	116.7	167.5	127.5	81.7	128.8	61	105.6	104.6	86.8	83.7	142.9	90.7	107.8	81.7	133.9	130.5	135.1	119.5	95.4	128.5	98.9	173.5	188.1	80.8	77.9	96.4	146.6	66.8	209.2
A0A287UW94	66.9	71.8	92.5	34.7	28.9	56.9	57.1					52.3	61.2	45.9	60.5	63	51.9	90.2	98	85.4	247.8	209.1	232.7	245.9	133	163	44.5	53.3	179.5	191.3	207.7	71.5	59	41.2	102.9	113.5	105.4	43.3	33	47.6	89.1	27.7	52.7	86.5	71.7	53.1	216.4	252	76.2
A0A287I4Z8	12.4	26.9	18.8	10	13.8	293.2	231.1	20.4	25.9	17.6	17.4	103.1	122.7	111.5	187.7	169.6	108.2	137.5	140.3	173.2	12.7	11.5	15.8	13.6	17.4	11.3	160.6	221.8	199.1	149.6	99.6	101.1	78.2	112.7	149.3	129.4	175.5	133.6	698.6	445.8	138.1	157.7	139.7	11.6	14.4	14.2	19.8	19.8	30.6
A0A287V2I9	130.1	170.3	163	103.3	86.1	91.2	106.2	90.1	127.4	117.9	113.7	205.2	140.1	147.8	172	118.2	151.1	120.1	128.3	124.9	48.9	47.5	64.9	56.8	42.5	52.3	113.4	76.7	65	66.4	53.3	62.2	52.1	57.8	35.3	48.9	48.4	124.6	94.1	85.4	77.5	39.5	102.2	18.8	18.3	21.1	59.2	60	63.3
A0A287TBK2	166.3	76.7	29.6			138.1	162.1					40.5	48.4	55.5				30.9	27.7	27.7				43.9	38.1	40.7	49.5	43.3	294.5	308.2	287.9	240	155.5	248.6	54.8	51.8	45.9	146.7	75.7	143.5	56	67.9	84.5	394.3	228	72.4	283.7	120.9	153.6
A0A287V0B8	90.6	74.9	115.9			62.6	75.8								89.4	87.8	65.5	85.2	65.8	54.7	390.1	280.5	486.7	290.2	312.2	210.6												212.7	227.1	82.5	82	79.5	51.2	107.6	50.6	69.7	190.7	103.1	68.3
E9LFE6	72.6	77.5	50.6	37.9	59.5	150.4	103.1	109	127.7	74.8	78.2	59.5	72.7	82.1	90	79.2	64	57.9	63	41.9				54.3	90.4	91.5	87.3	143.5	73.5	72.7	75	57.5	67	96.8	53.6	29.3	48.4	45.4	71.5	61.4	39.8	54.6	31.9	77.1	115.3	117.1	122.7	141.2	115.8
A0A287LPJ5	112.5	103	119.8	86.4	80.2	121.2	99.5	158.4	151.7	129.9	141.8	128.9	114.5	99.4	141.7	138.7	95.7	129.1	152	115.2	126	126	109	101.4	118.2	112	103.4	116.6	94.9	134.6	105.5	116.6	117.1	126.7	98	122.2	116.2	126.7	158.1	143	119	90.7	121.3	115	143	98.1	131.4	122.2	243.1
M0YV31	254.2	213.1	201	216.7	219.7	216.1	474.1	217.5	206.3	267.6	322.4				217.5	186.6	155.3	172.8	171.8	200.2	296.2	257.9	338.8	135.5	115.3	129.7						113.6	157.4	140.1	261.4	251.9	244.4	159.7	198.6	235.3
M0UMZ9	57.3	105.8	107.1	129.8	172.7	87.9	185.9	68	105.3	111.6	176	127.5	142.5	152.8	114.8	127.4	70.6	77.7	84.7	120.7	248.2	120	202.2	337.7	148.8	264.4	100.4	175	304.8	74.1	55.8	81.6	79.4	74.3	125.4	79.7	75.7	68.5	118.9	99.8	109.2	124.2	128.2	134.5	92	96.8	162.1	70.5	64.4
F2DIC1	87.2	72	105.7	36.9	44.3										78.5	62.5	86.7				222.8	258.4	180.5	163.8	122.2	157.6			151	118.9	151.6	95.2	73.5	88.6				126.2	164.3	164.8	49.8	60.9	49.1	94.3	104.3	78.1	161.2	103.5	112.1
F2D030	32.7	47.8	21.5	101.2	88.4	37.6	98.7	55.6	46.4	58.8	70.5	33.1	10.3	33.2	115.3	100.6	90.3	62.5	72.2	53	18.5	33.3	44.4	37.4	49.9	26.3	30.3	36.6	61.1	75.7	67.1	41.6	73.4	85.1	139.6	49.4	121.5	220	417.9	532.9	38	69	85.5	961.3	40.9	733.9	39.7	34.1	84
A0A287PKK6	189.4	169.3	129.7	241.1	192.1	142.3	218.3	127.2	111.3	140.9	130.5	111.6	142.7	81.4	85.5	83	84	67.2	90.5	115.6	207.6	218.6	110	89.7	89.5	69.3	129.7	78.3	94.1	106.3	121.5	119	111.1	123.1	111	136.2	222.2	65	134.9	87.9	146.8	157	149.3	160.1	101.3	117.7	191.2	129.9	122.4
A0A287PVH4	156.1	160.3	99.8	66.2	64.1	60	60.4	190.6	199.9	59.8	72.1	63.8	84.2	78.2	93.4	48.7	91.6	94.1	181.4	124.9	63.6	72.9	67.3				131	105.3				80.3	75.3	69.5				240.5	194.7	249.4				68.1	74.2	65.2	115.6	134.4	109.7
A0A287XHE0	87.9	68.8	79.6	38.3	52.8	163.1	133.8	46.6	37.5	47.5	53.5	89	70	64.1	73.3	75.5	52.8	64.2	49.4	75.2	157.8	121.4	103.4	126.2	142.6	156.2	70.1	106.7	95.6	74.4	80.1	81.2	70.7	122	52.8	62.2	60.6	78.3	107.3	77.9	51	49	58.7	129.3	138	126.7	147.5	144.6	143.7
A0A287PAL8	76.5	63.5	87.4	17.2	15.5	20.4	17.2	61.2	123.1	20.9	16	90.3	110.3	137.8	100.8	89.8	105.5	89.1	210.2	75.4	61.8	43.3	66.4	84.2	66.6	102.8	82.3	118.2	57.9	73.3	60.8	89.6	54.8	63.3	18.9	25.4	28.3	125.6	258.4	65.4	95.7	120.4	73.6	56.1	62.9	82.7	55	69.2	133.2
A0A287F2M6	131.8	187.1	118.1			112.1	102.3														386.9	340.8	319				151.7	143.9				311	358.5	124.8	178.1	185.6	129.6										268	305.7	383.2
F2DKC2																					334.5	337.8	171.6															356.2	333.8	433.5							715.5	381.8	621.5
M0WMV2	82.9	96.7	112.6	104.8	151.5	75.9	74	100.5	80.1	50.8	62.8	131.3	83.1	79.7	80.8	79.8	81.4	253	252.9	277.6	66	134.6	134.6	48.7	107.9	46.8	116.5	106.4	103.5	72.7	62.8	125.8	124.5	100.8	70.1	96	102.5	171.6	66.2	92.2	103.7	89.8	81.5	57.1	75	44.1	56.9	26	73.5
F2D9L1	152.4	152.5	183.1			90	81.8											63.4	79.5	67.3	360.1	324	179.2	299	223	166.9			196.5	205.4	194.3	101.8	77.9	117.7	162.7	190.8	155.6							243.9	244	172.9	292.8	283.5	274.2
A0A287RJI1	177.6	170	229.8	159.9	80.2	99.2	73	44	41			72.2	66.8	84.5	81.5	76.1	79.4	79.2	71.3	58.2	322.3	222.4	181.5	213.2	105.4	132.9	59.9	70.3	201.4	138.5	146.4	158.8	170	147.2	110.5	193.7	193.2	120.6	64.2	131.4	103.7	96.6	101.7	179	173.7	144.9	313.1	269.6	134.5
A0A287MX77																																						329.9	264	266.2
F2DZ36	43.5	82.9	61.2	225.7	228.2	104.7	57.4	103.6	37.3	125.4	117	148.7	70.5	27.5	93.9	132.1	116.7	41.3	79.8	104.6	128.9	260.7	204	139.5	106.7	187.9	138	127.1	71.4	131.1	136.5	81.7	150.2	147.1	132.3	60.9	184.8	62.5	113.8	101.2	110.4	49.4	25.8	98.8	76	118.6	98	65.2	88.9
A0A287UR13	105.8	154	100.9	135.7	151.6	56.7	51.5	73.4	78.3	239	87.1	79.6	73.2	92	134.4	141.3	82.9	95	62.9	119.7	218	48.8	255.7	192.3	126.6	166	106.8	126.5	179.4	170.1	174.6	63.8	79.1	63.3	116.1	162.9	113.9	115.6	91.6	34.4	33	45.8	45.3	139.1	124.7	141.9	130.5	136.5	82
A0A287S8E6	153.3	184.2	109.9	97.6	121	27.4	33.9	35.8	48.9	84.4	75.1	116.3	99.1	143.9	81.5	229.2	135.3	175.6	130.1	100.9	218	104.2	76.6	151	111.4	181	92.5	111	160	66.8	146.5	21.9	36.1	42	121.2	93.7	76.3	94	126	56.9	82.9	75	104.2	57.7	65.5	67.5	99.9	107	111
A0A287MEG0	94.8	142.4	70.2	79.9	99.6	168.5	241.2	135.4	127.4	69	68.5	85.2	94.9	125.7	103	137	56.1	123.2	85.4	137.4	424.1	89.1	342.4	88.3	139.1	175.3	167.3	145.8	132.5	143.3	184.3				83.2	106.6	81.6	259.6	224.6	172.2	79.6	109.9	45.6				154.6	185	146.8
A0A287TVJ2	105.5	193.3	93.3	163.1	157.9	157	145.1	198.5	306.5	255	113.4	111.1	200.6	231.5	127.2	128.6	136.8	205.2	171.5	170.3	136.1	137.4	201.2	123.5	148.8	100.1	253.8	283.9	9.5	14	12.4	7.6	11.8	11.5	211.1	149.7	115				142.9	117.4	161.5	80.8	102.8	91.4	77.4	100.5	131.4
A0A287SGU9	85.1	108.1	60.4	63.4	79.5	63.4	115.7	100.6	131.7	132.1	144.4	143.7	42.1	106.8	113.4	89.4	89	93.3	113.9	71.9	142.9	65.6	68.6	57.6	139.7	115.3	87.5	113.8	120.1	122.5	125.3	109	81	90.5	67.6	56.4	40.2	96.7	111	78.5	69	67.7	130.1	87.6	95.6	101.4	104.7	93.6	98.3
F2DB74	213.4	68.5	124.6	48.2	23.5	62.7	56.1	51.9	61.7	33.9	32.8	39.1	51.8	34.8	42	37.4	44	111.8	172.9	57.2	199.5	42.5	106.6	174.5	33.8	132	72.1	36.1	61.8	58.3	181.7	157.5	88.1	148.4	46.2	125.7	72.9	94.6	135.4	144	68.5	135.6	30.3	235.3	286.1	221.4	270.2	72.9	118.2
A0A287FRJ4	78.4	100.1	71.5	107.8	101.2	78.1	100.2	77.5	109.1	116.5	138.1	87.3	70.6	107.4	114.8	110.2	71.5	63.8	80.9	90.9	84.9	113.2	115.4	107.4	128.5	107.2	111.8	159.1	86.3	91.1	87.4	60.3	114.9	99.1	67.9	79.1	74.9	112.5	113	99.5	97.1	120.9	101.4	80.7	110.5	80.8	68.4	79.5	132.5
F2DFX0				38.3	43.2	145.1	138.4	140.5	121.8	62.9	85	112.9	114	99	157.2	157.3	143.9	203.4	165.6	212.5	91.7	76.8	100						50.3	62.1	40	50.7	52.9	43.9	67.5	78.7	77.6	82.1	88.5	127.2				39.1	39	48.5	113.5	111.3	97.7
A0A287TDE6				69.1	66.6			98.5	89.6			229.3	169.1	148.1	92	95	114.3	102.1	118.8	110.6	129.8	156.9	199	114.5	108.2	118.2	145.6	116.4	124.9	85.4	148.9										84.9	70.9	76.3	78	79.5	82.5	180.2	224.1	215.6
A0A287S3J3	58.1	49	50.5	42.2	446.7	169	421.1	60.3	54.6	38.8	41.4	49.7	49.4	51.1	218.1	241.2	240.5	167.3	236.2	69.1	21.8	47.8	29.6	48.1	50	50	47.7	63.3	37.3	60.2	36.3	45.5	56.5	55.7	46.5	41.5	60.1	286.1	217.1	48.1	77.4	245.5	382.2	73.2	188.6	72.3	187.9	63.6	192.9
A0A287K2P8	112.7	102.5	104.4	65.6	55.8	80.2	118.8	81.4	124.7	97.2	66.9	65.7	119.1	121.6	55.7	126.3	72.2	105.5	92.2	99.1	148.8	62.2	39.9	181.3	112.7	181	90.5	107.3	154.3	93.6	65.2	88.2	54.2	94.8	106.6	93	81.8	56.4	167.8	71.5	76	103.6	41.4	87.6	92.6	77.7	200.5	86	203.3
A0A287KMB8	127.5	182.4	103.8	105.5	142.7	111	47	160.7	211.6	190.9	126.5	156.8	199.2	157.1	219.9	166.3	232.2	99.3	91.7	55.4	75.7	67.1	70.3	73.8	121.1	97.9	106.7	208.2	109.3	111.2	134.7	114.9	100.7	108	124.1	87.8	77.1	82.2	126.5	106.2	97.5	153.7	103.1	79.6	79.4	76	114	113.4	195.6
S4YZ29	183.3	221.8	161.6	184.2	144.1	144.6	129.1	34.8	38.9	42	32.7	51.2	65.9	51.4							414	97.2	171.4	288.2	243.3	217.1	22.1	27.7	99.9	146.9	287.1	253.3	322.3	305	78.9	123.5	159.5	87.8	78.5	211.1	94.5	37.5	79.6	262.7	208.5	200.1	487.5	155.4	373.3
M0YIV4	190.2	137.2	122.5			174.8	168.3																																					196.2	204.6	187.6	124	161.1	200
A0A287Q1Q5	127.1	225.7	236.3			48.6	51.1								50.9	48.3	42.3	35.8	37.2	23.8	349.6	359.3	469.1	265.1	105.6	203	48.8	39.7	175.1	198.5	190.4	77.2	55.4	58.2	118	88.9	127.2	48.2	43.4	47.9	20.3	38.7	41.3	205.9	150.7	127.6	238	173.2	143.6
A0A287JMQ9	124.2	114.1	122.9	134.8	128.2	69.8	74.7	99.9	117.1	77.9	74.4	84.2	92	81.3	68.7	59.6	52.6	103.8	104.1	98.3	73.5	109.8	59.6	74.6	63.5	56			75	81.8	125.2	114.3	70.4	155.6	64	126.6	86.5	216.3	106	140.2	74.1	96.9	122.8	25.1	46	47.6
A0A287N7H2	149.7	38.3	82.9	27.2	28	133.2	124.8	60.3	43.1			62.2	29.2	32.5	38.6	38.7	29.6	23.1	81.9	85.9	60	34.3	54.5	49.7	57.6	50	64.8	41.4	116.9	126.6	151.5	192.5	119.1	174.3	87.2	115.6	116.8	240.9	292.3	199.2	76.1	128.4	19	246.2	46.4	212.9	213.6	141.8	109.3
F2EEP9	115.8	219.6	150	88.3	150	115.8	112.7			156	204.8	147.9	186.9	226.1	59.4	52.6	62.4	54.8	60.3	73.2				170.8	174.4	179.5						133	333.8	199.1	201.7	158.8	142.7	344.3	92.6	175.8	88.3	84.1	140.4
F2DXE4	194.6	176.4	175.2							105.8	120.6				95.8	78	75.6				358.4	233.6	268.1	229.3	212.9	196.1						133.8	145.5	144.8	97.7	307.3	194.4							158	138.3	137.2	181.9	198.9	213.3
A0A287JGQ1	85.1	28.3	46.9	19.6	41.5	46.2	47.2	69.1	70.6	23.2	94	42	133.3	129.8	50	53.5	46.6	149.8	112.3	29.6	370.2	43.8	188.8	210	19	38.2	88	23.8	161.8	24.8	80.6				120.4	241.3	58.1				51.8	95.5	25.7	145.1	56.1	121.4	43.8	69.2	19.6
F2E652	184.4	149.2	179.1	121	197.7	41.2	894	71.6	79.2	101.7	93	67.1	58.5	68.1	118.2	110.8	90.6	112.4	116.9	126.9	80.2	108.5	109.3	66.8	62.7	59.3	36.3	39.9	29.9	29.7	27	37.9	30.3	47.2				33.3	31.5	22.3	81.9	89.4	97.7
F2DGG6	154.1	190.7	191.5			39.1	28.6			197.1	199.1				91	58.4	57.6	76.9	79.1	97.1	115.8	75.3	89.8				152.2	146.5	63.3	63.5	69.4	136.7	124.6	171.8	182.9	117.7	163	67.2	77.5	304.8	126.7	63.6	69	173.5	150.3	133	96.4	139.5	30.8
F2D0R3	216.7	252.9	246.7			296.1	266.3																						236.2	206.5	207.9	243.4	519.9	491.6										183.2	321.4	381.9	283.3	251.4	278.1
F2DT04	147.1	97.3	93.8	69.4	61.5	99.1	46.1	122.2	98.7	70.1	55.8				100	89.4	81.4	82.5	104.2	89.4	102.2	100.2	97.5	109.9	135.7	122.2	139.2	128.7	41.3	104.3	58.7				89.5	75.2	76.6	73.1	91.6	47	88.2	79.7	79.2	40.8	41.5	52.8	102.9	113.4	107.2
A0A287XMN3																		86.7	82.6	92.7	284.9	256	286.4						156.2	127.3	170.2				128.3	153.2	149.6
F2D688				102.3	114.7	199.7	168.9								84.1	50.6	73.2	321.4	332.4	294.8	214.1	78.7	151.8	351.8	367.6	344.7	63.3	67.4	114.2	53.2	70.6	319.7	74.4	105.5	74.9	91	75				93.1	71.9	86.2				79.7	98	92.9
Q05968	130.9	119.5	128.7	93.8	91.2	105.9	79	164.8	107.8			140.5	89	79.2	18	12.9	20.3	65.2	115	124.4	72.9	35.2	83.1	91.6	122.4	85.2	168.4	134.7	63.3	206.8	129.1	133.8	188.8	210.4	65.8	62.7	77.3	82.9	125.4	97.2	93	113.1	89.5	104.5	112.3	105.7	209.3	211.1	188.3
M0XEX8	152.7	146	181.8			56.1	61.8					92.6	83.9	72.1				76.2	60.7	51.1							86.4	64.7	138.7	161.4	68	112.8	106.9	92.1				177.8	315.3	79.5	83	163	102.1	90.5	72.2	45.8	104.8	126.3	153.1
F2CYG6	357.7	457.3	400.2																		107.6	77.3	87.5	54.1	48.2	51.5			337.7	331.3	328.9				283.1	295.7	270.1
A0A287F0Q7																													251.3	202.2	206.9	92.4	66.8	108.6										397.4	418.4	323.7	476	522	622.4
B2CHJ4															336.1	332.8	273.3																					362	281.6	309.1	221.3	435	337.7
A0A287I1F2	153.6	76.5	161.8	144.8	134.9	163.6	217.5	192.9	37.8			159.2	158.8	96.3	60.9	48.4	48.6	46.2	168.6	164.9	27.8	167.5	112.4	23.5	31.5	52.4	184.8	31.2	19.4	175	113.8	137.1	124.8	198.1	78.4	57.2	83.6	116.5	192.1	73.1	68.2	155.2	19.8	67.4	127.4	41.5	112.6	49.7	160.1
A0A287SM95	124.2	142.5	115.1	65.6	65.2	55	59.6	98.2	218.3	125.2	162.4	75.9	94	110.7	178.8	118.2	88.6	213	176.5	174.2				114.5	125.1	171.8	99.8	227.2	113.4	82.9	76.4	84.2	127.3	110.5	101.2	89.4	75.3	167.2	332.1	198.8				40.5	41.9	38.3	68.2	81	92
A0A287IEH1
A0A287UTD0																		497	478.2	510.1
A0A287QRK0	13.7	158.7	78.7	71.5	199.2	13.2	88.7	38.5	82.2	133.4	106	56.6	121.7	129.2	165.7	59.4	86.7	149	65.6	83.4	108.8	100	210.9	45.3	97.4	22.2	37.3	167.6	63.7	12.4	8.5	33	58.1	48.7	58.3	92.7	48.3	183.6	25.5	40.4	48.1	40.5	241	26	44.3	30.2	10.5	21.8	21.9
F2E8D9	172.7	162	161.1	105.7	70.5	83.8	70.6	154.2	168.6	72.4	73	102.5	59.3	96.5	79.2	82.3	66.8	128	137.8	120.5	76.2	60.8	80.4	62.5	73.1	52.7	78.2	74.1				82.5	75.3	79.8	69	59.7	80	95.8	45.1	69.5	99.9	71.5	56.6	140.4	102.9	144.1	51.2	88.9	52.7
F2DXZ4	135	126.1	80.5	45.6	44.3	115.5	119.8	63.8	62.8	74.2	75.3	105.6	102.3	130.6	89.1	71.7	51.5	100.7	78.7	86.5	80.6	138.7	118.3	87.7	71.7	63.1	169	181.4	146.7	218.5	227.3	93.1	91.3	102.9	41.6	35.9	37.4	157.1	173.8	145.4	108.9	107	91.2	219.9	215.3	225.4	147.4	150.7	171.6
M0ZAZ2	435.4	221.1	318.6	708.7	762.6			386.3	397.7	132.8	123.6	83.5	124.6	122	504.2	307.2	363.4				148.1	105.1	206.1				354.4	388.4							378.9	557.3	416.3										343.2	384.5	251
A0A287IRN8	92.9	107.8	107	84.4	80.9	26.5	21.5	74.8	69.9	69.5	76.5	90.4	118.1	75.9	81.4	75.3	68.8	117.1	97.4	109.7	73.8	75.9	60.4	75.6	56.8	73.8	41.5	48.9	46	47.6	34	50.1	36.8	60.8	68.8	123.9	62.6	128.6	95.4	96.8	76.4	94.1	79.8	88.6	89.6	68.7	104.7	78.3	65.5
A0A287HWR2	95.2	89.9	121.3	162.7	204.5	57	42.9	144.4	148	85.1	129.9	121.7	164.7	108.1	169.1	100.9	122.1	94.3	153.1	73.5	43.1	129.3	171.3	28.8	111.1	79	89.3	90.7	27.6	129.3	65.8	82.5	134.8	140.3	75.4	108	67.3	239.1	58.6	116.4	125.3	109.7	117.1	50.8	57	55.8	50.2	72.4	67.5
A0A287VV75																													130.3	111.9	144.4	226.4	333	293.3				168.5	217.8	215.7							199.6	253.8	245.5
A0A287WKQ1								300.5	362.3									114.9	139.4	112.2	109.9	173.4	134.8				342.2	293.1	181.6	194.6	163.1	220.3	279.4	345.9				645.7	687.8	808
A0A287UZD3
A0A287UT09	68.3	78.3	34.6	54.5	59.3	51.5	56.5	270.4	245.4	4.2	4.4	2.2	5.7	5.1	40.6	37.4	31.1	5	5.6	5	94.8	219.5	114.1	99.6	38.7	57.4	235	47.4	234	252.8	192	305.8	280.5	194.3	41.1	51.4	44.1	49.4	57.6	45.1	164.5	207.8	176	61.8	230.4	291.6	191.8	161.8	316.6
F2DDM9																					212.7	208.3	270.5	267.3	248.6	268.6																					579.6	383.6	680.3
A0A287GTR5	209.7	222.8	197.5																		188.9	180.9	270.7	154.9	144.3	112.8																		185.6	133.1	92.5	369.9	198.7	79.7
F2E6B9						151.7	173.2			171.2	125.4				149.2	136	164.8							35.6	35.2	38.4	220.1	172										124.1	165.9	108.1				29.7	32.3	35
A0A287N2F8				58.1	78.6																343.6	380.7	459.6	443.2	435.8	329.2	142.9	153.6	138.5	202.7	188.5				105.4	95.1	76.1							106.3	78.8	103.8	231.7	131.4	238.6
F2DKL9	103.4	92.7	91.8	119.3	115.8	1187.8	1001.2	73.4	60.4	57.5	47.7	41.1	25.7	38.5	45.6	44.1	29.7	38.7	31.7	35.3	36.9	43.4	33.1	32.2	43.6	32.4	31.2	40.6	54.1	57.4	63.9	152.5	182.8	188	53.4	56	65.8				40.1	18.5	34.2	78.2	110.9	85.3	18.5	20.3	36.6
M0WI75	78.8	82.9	134.5									105.5	75.2	93				92.9	87.9	94.9				117.7	107.1	94.5									71.8	105.9	83.1	181.3	152	146.7	102.9	98.5	138.3
A0A287R194	102.9	68.2	119.6			44.1	47.9	71.5	34.8			142.4	94.9	58.1				85.4	103	80.5	53.2	78.5	56.1				74.8	96.2	58.5	64.4	63.4	59.1	134.2	213.4	99.7	105.7	97	148.1	112	133.5	95.7	103	103.1	95.3	73.8	63.3	75	65.6	58
F2E7H5	41.5	84	68.9	93	156.2	90.9	56.8	97.3	65.9	151.7	110.1	105.8	58.8	112.2	73.3	130.6	80.4	123.6	133.4	138.5	70	140.5	74.7	139.2	149.2	138.1	152.1	159.9	152.6	114.9	58.6	59.5	83.8	75.9	139.2	45	87.8	91.7	40.4	70.1	75.1	76.2	192.4	157.3	214.8	68.6	39.4	52.5	126.2
M0X338	91.9	128.9	97.8	32.4	46.5			80.6	100.2	142.7	108.2	132.8	115.1	175.5	125.9	156.9	121.7	168.8	124.6	94.1							86.3	194	121.4	41.9	74.5	93.7	76	105.2	127.6	150.6	79.7	196.3	179.5	154.5	114.9	110.2	96.4				81.1	96.1	87.1
A0A287N8B5				60.1	62.8					101.4	113.4	46.6	57	59.5	100.6	97.8	71.4				139.9	114.3	96.6	68.4	71.8	54.9	76.2	87.3	106	128.9	103.5	213.9	503.7	171.6	92.8	200.3	267.6	159.7	58.4	208.3	99.3	137.4	126.5	150.2	121.4	110.6	160.9	78.5	138.1
F2DPU4															238.4	183.3	255
A0A287SQY4	154.4	111.1	152.6	38.2	35.4	57.2	53.6	103.1	114.5	80.1	91.1	142.9	145.3	151.1	76	80	79.9	86.3	90.5	76.4	117.1	165.3	100.3	91.7	91.7	70.2	136.6	99	113.6	25.9	207.1	167.2	27.5	24.6	152.9	200.1	172.9	175.2	120.7	190.3	96.4	105.1	152.3	155.5	144.1	92.1	242	105.8	74.8
A0A287G650	153.9	84.5	291.5	117	69.2	111.4	85	58.4	79.7	47.5	49	24.7	60	129.7	16.2	135.7	26.5	154.2	146.8	83.6	89.7	61.4	15.9	404.9	64.1	370.5	81.6	89.6	111.7	65.3	114.1	154.7	21.3	39.4	140.4	72.2	132.1	14.9	212.8	125.1	128.6	132.3	14.3	215.9	13.8	180	292.2	156.7	94
A0A287S2W4	169.6	197.7	120.6	97.5	140.6	83.5	81.6	34.6	42.9	45.4	38.8	296.6	216.3	207.8	91.2	173.3	176.9	207	75.4	115.5	147.8	98.5	179.7	186.4	182.4	155.5			45.4	46.5	40.3	192.4	82.9	274	194.5	33.6	125.2	106.2	119.5	105.9	127.3	85.9	149.4
A0A287W2Y8																																															274	378.5	302.2
A0A287SYF6	76.9	164.7	126.8	74.4	140.8					63.4	67							159.5	188.3	91.3	60.5	126.7	52.9				134.8	110	87.3	115.9	77.1							114.7	111.9	127.5	158.5	114.2	152.1				129.2	120.8	112
A0A287UY47	147.6	77.4	137.7	139.6	153.7	148.1	162.2	172.9	137.9			175.4	174.1	191.5							202.6	43.3	144.2									166.5	279.7	206.3				258.8	130.4	130.7
A0A287XRU2	173.5	134.4	137.7	163.3	140.1	93.4	74.9	124.8	87	76.1	72.1	152.7	103.5	101.9	89.1	89.7	110.2	88.8	106.1	155.2	85.1	194.9	95.9	78.6	76.8	86.2	90.2	103.1	83.9	144.3	77.3	99.8	109.4	122	75	67.8	111.8	112.8	85.2	107.8	136.2	89.4	128.4	99.7	110.9	95.4	109.3	57.4	81.2
A0A287P3G4	215	223.6	167.2	166.3	188.6	107	105.2	106.4	128.7	162.7	89.6	96.2	91.3	104.2	191.8	143	120.2	177.3	170	143.6	80.1	96.1	127.7	148.9	135.6	130.7	123.3	131.1	120.7	155.6	109	92	85.4	132.7	124.5	122.3	100.8				161.5	117.6	163.4				110.5	62	135.3
A0A287EJH4	171.1	136.4	142.4	74.7	78.6	105.3	68.7								44.6	36.8	40.2				153.2	128.8	82.8	123.6	116	128.6	93.9	84.3	202.5	186.9	158.8	162.5	163.8	135.1	91.2	104.3	91.9				103.5	119.4	93	185.4	150.7	119.6	227.4	105.3	178.5
A0A287EKM8	42.1	36.7	95.5	88.4	26.8	165.1	88.2	184.7	111.7	39.1	109.8	65	152.7	117.3	29.5	43.2	34.3	54.9	56.8	111.2	27.8	63.1	13	105.8	99.4	170.9	134.8	127.7	43.7	174	24.2	139.4	49.1	144.1	74.5	90.6	77.7	111.5	189.1	65.9	150.8	185.1	16	114.3	208	130.9	115.1	143.6	183.5
A0A287QBA8	85.8	100.5	80.8	144.6	95.3	87	91.2	89.1	132.9	205.6	180.4	98.6	110.2	115.9	109.6	132.7	104.5	126.7	60	70	80.9	77	59.8	77.8	136.9	101.4	89.6	97.9	116.8	97	109.9	55	109.1	78.8	72.5	53	63.1	63.5	108	73.2	123.9	186.1	157.6	77.8	123.8	90.2	109.3	106.7	220.3
A0A287SFI2	115	178.6	113.3	110.5	144.5	28.4	82.3	131.3	168.8	122.5	95.6	119.9	61.3	104.9	132	91.9	121.3	104.9	142.4	137.5	79.6	90.2	125.8	61.6	99.1	59.1	124.4	156.3	76.2	78.6	51.1	87.7	92.1	118.8	64.6	120.9	75.4	207	95.4	107.4	126.4	111.2	181	61.3	53.5	48.2	35.3	35.6	35.7
A0A287KNT7	89.6	68	54.6	103.5	77.1	48.6	41.4	205.5	96.5	74.4	85.8	63.5	115.6	32	36.9	34.6	64.8	71	116.7	64.2	40.3	124.4	77.1	39	67.4	59.9	95.1	93.7	150.1	213.5	103.4	55	96	156.4	60.9	60.5	81.6	39.7	160.3	91.3	76.2	191.6	117.6	93.7	65.7	90.9	146	65.8	120.8
A0A287P8T1				153.7	163	198.5	225.5																						216.5	197.3	176.8	316.4	179.4	116.2				252.3	322.9	300.2							230.3	218.9	165.2
A0A287Q8J5	153.7	171.7	164.9			170.9	283.8											179.1	232.6	195.8	479.7	500.4	247.5	274.3	216.3	306.2			172.4	162.9	200.6	212.3	183.8	225.8	193.9	191.5	171.4							206	226.5	227.9
F2DIL1				118.3	175	221.4	232.5			184.7	216.1	165.7	151.1	147.7													193.9	154.7							110.2	212	145.6				173	122.6	172.4
F2EA24	164.5	156.4	113.4	52.2	77	82.5	99.5	84.6	99.7	107.9	115	61.1	163.6	166.8	76.7	104.4	72	134.7	130.9	122.5	124.4	56.8	58	140.7	104.8	107.1	106	135.9	85.8	122.5	154.9	112.9	35.8	80.9	94.5	119	104.7	101.7	257.1	109.2	70.7	78.5	33.8	117.7	112.1	96.9	76.4	81.1	273.3
A0A287IH69	172.3	179	158	144.1	185.3	117.8	117.5					79.9	59.2	45.8				230	217	217.1	285.1	273.1	295.9	64.5	57.1	70	123.7	126.4	66.2	82.5	92.8	93.9	58.9	80	89.8	58.6	81.4	126	109	102.4	289.9	304.4	215.6	69	108.8	59.4
F2CXL1	145.5	134.9	127.6															65.2	105.8	98.8	147.4	179.8	113.5				157.9	86				78	70.9	87.2	111.8	132.2	104.4	69.3	58.1	49.2	155.2	128.9	70.7	111.6	102.3	103.2	138.5	201	91.6
F2DFN2	243.5	369.5	257.1	123.2	129.3										41.9	72.9	63.9				260.5	216.9	161.2	208.9	209.1	103.6			131.5	150.2	174.9				178.3	156.6	189.5	83.3	97	61	190.9	234.6	220.8	186.9	239.2	185.2	239	272.7	181.1
A0A287HR73	112.5	143.5	87.3	148.2	135.3	31.1	28.1	124.3	119.3	70.5	80.1	170.4	96.9	135	187.5	127.9	138.3	147.3	156.3	126.9	56.4	87.6	132.5	31.8	32.4	30.4	84.8	93.3	112.6	106.5	137.1	151.3	99.4	179.2	113.9	110.4	113.1	156.2	144.6	106.2	71.9	93.6	89.5	110.3	128.2	101.1	81.7	101.4	82.5
F2EB67				243.6	299.2			407.3	359.3	149.6	123.8				241.6	330.6	241.8												281.6	314.9	305.1										321.6	339.9	525.6
F2DFU7																					101.7	148.1	205.2																		402.4	412.3	393.4	167.3	204.6	130.6	129.3	180.9	203.8
A0A287WBR8															131.8	133.4	135.3																					220.9	159.9	136.2				137.9	129.8	128.3	127	137.2	140.2
M0USA1	123.2	203.5	62.2	30.4	77.6			143	114.2	76.9	55.3	91.2	88.9	110.6	24.6	98.4	108.7	109.3	50.9	107.7	60.6	42.3	36.7	55.9	62.7	96.1	27.5	152.1	28.6	36.3	22.8	34.8	30.6	43	84.4	81.8	43.7	29.9	69.5	61.6	68.8	34.3	76.6				87.8	74.2	76
A0A287FX10	113.9	139.9	104.6	169.9	44.1	100.7	141.9	183.6	121	68.7	62.8	172.1	189.8	41.6	95.4	121.7	54.9	42.3	136.6	86.3	204.3	123.4	88.9	113.6	150.8	82.9	119.4	59.7	173.2	150.1	196.6	78.2	125.7	132.4	39.1	53	106.4	89.9	82.7	97	106.4	136.9	41	131.8	144.8	72.2	40.6	90.5	116.5
F2E350	99.9	110	106.7	160.2	167.5	129.9	130.8	142.5	156.7	312.6	221.3	167.8	140.4	175.1	61.4	85.8	146.9	40.1	35.8	39.1	33	43.3	47.1				48.3	45.7				104.1	101.6	113.4	170.7	101.2	127.5	194.6	118.7	160.2	299.4	123.3	186.3				74.5	102.8	95.8
M0WC94
F2CTA6	185.1	101.8	143.5	145.6	115.1	216.4	216.3					297.7	251.1	97.3	148.8	189.8	118.5	68.3	300.7	118.5									189.8	99.6	218	185.2	348	219.8				146.3	139.5	145.6	235	211.1	279.3	164.8	88.2	205.5	165.7	133.4	206.6
A0A287T6Z7	173.8	232	97	115.2	149.7			187.6	162.6			162.1	215.1	168.7	256.4	291.6	186.1	163	135.7	132				188.5	154.7	156.6	221.3	293.6				108.9	108.5	99				158.1	174.2	164	131	135.2	197				233	189.7	245
A0A287U6W1	46.5	47.2	51.5												190.9	95.7	162.6	51.6	55.4	56.1	44.6	78.2	88.6						53.4	42.7	44.1													79.7	81.4	67.6
A0A287F081
F2D4M8	248.2	112.5	71.8	65.3	92.8	77.5	58.2	85.3	106.2	75	48.6	168.6	118.8	84.8	70.1	73.5	77.8	53.7	192.6	116.5	26.8	56.5	46.8	40.4	59.6	84.4	79.3	152	73.2	123.2	104.8	184.3	169.7	173.7	55.8	62.7	99.1	123.9	179.9	33.8	53	118.9	54.5	103.7	61.7	119.6	67.7	59.8	199.9
A0A287V3E2	214	244.1	139.5	166.4	179.4	64.8	28.7	248.8	287.6	223.8	149.5	127.8	199.6	179.1	169.7	187.4	159.1	131.8	130.6	154.8	38	38.6	29.9	122.2	124.9	136.4	190.7	266.2	30.9	60.6	20.6	32.5	34	76.8	151.9	130.7	149.5	58.1	163.3	33	115	169.2	106	108.6	171.3	138.1	60.8	93.2	104.3
A0A287U7U4												686.1	683.3	883.3				238.8	170.2	225.4												585	383.5	564.2
F2DYB6	81.6	81.1	51.3	68.7	66.2	65.3	62.7	54.1	53.1	85.4	60.2	102.7	55.5	57.7	131.7	68.2	77.5	79.6	151.8	99.1	84.1	94.1	94.8	59.1	57.1	48.9	89	73.6	59.2	45.4	109.2	77.3	123.8	119.1	78.5	112	102.1	192.9	70.6	122.6	57	114.6	106.4	63.3	83.7	90.1	50	59.3	136
A0A287N275	136.3	130.2	102.8	31.7	39.7	33	27.8	146	148.1			41.5	39.3	42.1				52.8	39.7	58.7	73.6	48.8	38.9	43.2	46.8	44	112.6	112.3	261.7	197.9	255.2	41	66.2	85.7	29.7	37.1	39.7	54.5	229.3	83	54.2	68.2	66.4	60.2	78.4	73.8	135.1	185.3	233.9
F2CYF5	350.6	382.2	397.6																																336.1	389.7	396.3										875.3	694.2	898.2
A0A287TLJ0	190.9	174.6	313.3			197	215.8														448.4	378.5	402.2	289.3	148.7	222.9			142	142.7	89.5
H9N7V6	65.7	76.9	68.5	220.1	168.3			43.4	50.3	86.9	155.4	76.9	70.9	82	209	150.1	163.4	74.2	59.5	54	57.9	160.8	249.3	58.4	81.2	51.4	106.9	95.9	78.4	78	73.8	199.7	129.7	160.9	88.2	57.9	56.7	285.1	141.7	298.4	60.1	282.2	233.2
F2DDP4				93.3	76.3	173.2	185.3			145	160.5	137.3	108	106.5	70.2	92.9	102.9	167.3	192.5	156.3	86.7	94.1	74.3	74.2	94.2	77.5			159.3	162.7	177.5	135.4	170.9	99.9	76.6	65.5	97.2				88	164	143.1	182.3	218.1	186.1	142.5	124.2	118.6
A0A287IM48																					338.1	472	237.4																					867.7	714.9	693.4
A0A287G451	74	113.4	101.1	121.6	183.1	58.1	74.6	261.5	102.4	79.6	126.5	118.2	122.8	74.9	158	48.4	102	98.1	99.4	119.1	74.2	174.7	172.2	82.7	155.9	62.1	148.5	119.2	61.8	224.9	98.7	98.7	127.2	149.1	49.6	53.7	86.2	81.3	85.4	90.8	105.3	114.1	105.3	94.9	57.3	67.4	65.8	128.9	68.4
A0A287U8I2						140	117.4					148.1	145.7	182.5													96.7	90.3	66.7	242.6	187.2	180.8	110.4	102.8				483.8	382.5	382.7	147	131.3	142.6	128.1	94.1	116.8	95.5	157.7	188.5
A0A287K7R3	151.6	165.4	105.4	111.7	100.8	110.8	129.5														144.1	104.8	224.7	123.6	167.7	133.3			105.7	135.2	116	146.6	131	118.8	57.2	78.6	85.3	147.8	107.2	160.7	147.3	116.2	161.7	130.9	79	101.6	338.2	141.6	99.1
F2DTX7	171.5	392.3	286.2																		348.3	188.3	381.1						322.1	209.4	272.7	323.4	230.7	175.3	175.6	203.4	160.8				320.5	305.8	215.1				437	304.5	371.1
A0A287R671	125.2	114.9	160.4			49.4	41.1	94.5	75.5			240.4	211.7	220.7	66.1	46.4	32.1	114.8	181.5	144.4							58.9	52	56.8	83	56.2							73.4	98	77.2	41.9	56.7	66.5	39.9	34.8	31.8	38.3	30.4	47.8
F2CR42	247.7	262.6	176.9	144.1	132.8	34.2	39.2	92.3	255.6	149.8	111.6	196.3	153.3	185.4	215.9	125	166	160.7	151.3	106.7	38	64	65.1	26.3	59.8	71.4	59.8	131.9	77.4	48.4	97.2	102.7	120.6	96.8	110.1	117	101.4	76.5	180.1	84.5	171.8	127.7	118.3	55.4	33.6	48.9	98.9	84.1	137.5
A0A287KIG6	1139.5	812.4	807.2	638.7	533.3													724.9	1020	979.7	462.3	1490.8	553.6						582.6	798.9	1071.6				592.8	876	691							464.9	265.2	493.4
M0W4W4																					461.3	416.4	357.2	720.8	722.4	856.5																					1166.4	1085.6	1705.4
A0A287QL45	91.1	84.6	88.7	71.5	70.9			227.4	163	77.3	71.9	92.7	119.3	58.2	61.1	20.1	50.8	69.7	105.2	110.8	87.7	144.2	45.8	56.8	98.8	43	112.9	80.1	193.5	186.4	113.3	77.1	148	128.2	45	96.5	108.2	167.8	119.9	184.9	124.2	115.5	101.7				88.7	109.8	101.7
A0A287WRS2	346.6	524.5	346.5	419.7	523.9							288.5	456.9	343.4	196.8	202.4	197.6	219.9	285.2	199	230.5	333	357.6				314.2	457.4	515	377.2	241.5	311.3	270.7	380.8
A0A287WY19	83.4	88.4	67.4	54.1	47.3	105.4	46.1	45.6	126.1	60	67.3	40.8	72.9	87.1	33.6	131.9	119.8	72.5	71	37	74	22.2	39.9	60.7	38.2	97.5	49.5	108.4	46.9	29.9	40	70.7	58	177.7	62.5	43.2	41.3	112.8	97.2	140.5	106.2	154.8	112.8	65.4	131.7	94.1	170.1	207.7	144.7
A0A287QEG7	135.2	103.9	85.9	41.8	33.6	256.5	265.8	70.3	24.9	7.4	15.4	38.6	28.9	43.8	20	28.5	22.4	40.4	40.9	85.1	80.7	35.1	60.5	130.3	160.3	165.2	96.5	99.7	53.2	84.8	161.4	125.6	32.2	66.7	60.8	50.5	65.5	156.9	179.3	123.7	104	119.4	129.7	259.6	201	142.3	542.9	200.7	276.6
A0A287KUR4	163.7	183.1	245.4	336.1	394.4	217.2	283.1														308.1	210.5	221	143.8	184.1	163			253	292.1	205	137.7	196.5	240.9	209.5	270.3	316.9	94.8	87.2	81.7				211.2	435.7	189.7	570.2	359.1	400.4
A0A287X6N5	168.9	207	237.3	124.1	130.3	96.7	96.7	216.1	224.3	178.1	190.6	103.9	81.3	69.5							105.3	107.5	94.4	97.6	106.2	38.6	304	275.3	93.5	113.6	145.8	54.8	96.4	88.8	138.7	150.5	168.6	171.3	45.1	143.4	57.7	55.6	65.8
A0A287GU29				102.3	75.8			36.4	72	206.5	190.4	80.9	80.1	125	143.9	164.4	160.4	199.9	204.5	118.1	115.8	98.7	118.6	197.9	120.1	266.3	86.5	79.8	109.6	76.4	146.5				247.4	309.7	211.7				138.6	54.3	92.7				380.8	117.2	131.9
A0A287DUE7	48.2	27.9	80.1	68	64.7	162	85.2	61	48.3	47.9	44.2	42.9	68.1	65.2	78	71.2	69.4	69.4	29.6	104.8	205	138.4	224.4	384.5	65.7	249.4	59.2	33.8	123.6	67.4	219.4	192.7	157.2	71.8	71.2	134.6	106	139	149.9	128.6	97.9	104	97.6	327.4	28.7	249.6	385.8	237.6	59.8
Q949H0	95.8	72.4	232.7	196.9	215.9	156.1	144.8	35.9	26.6			178.1	118.9	104.3	73.3	67.1	53.6	62.2	43.9	75.3	216.1	167.7	211	228.2	198.1	198.6	79.1	80.2	91.6	79.5	102.6	93.2	74.2	86.4	182.5	214.1	160.5	118.4	86.7	85.1	45.9	54.7	35.8	93.7	100.6	102.8	166.9	114.3	144
A0A287HC25	128.7	215.5	159.1	156.5	193.6	102	83.9	122.5	114.8	111	68.4	166.1	131.5	161.5	191	239.5	153.2	149.7	134.9	136.7	131.1	103.9	77.9	97.3	99	125.3	105.9	145.4	112.7	107.4	90.7	64.3	66.5	148.2	128.5	126.2	124.2	95	148	73.4	124.8	145.5	78.8	75.3	101.9	89.8	76.5	61.8	146
F2DBR2	135.8	104.5	162.3	57.6	78.9			120.8	113.5			123.9	108.6	141.6				89.9	173.3	129.5				75.7	52.3	56			188.6	124.5	94.6	123.2	142.8	175.2	95	83.7	116.7	151.4	170	102	139.3	115.6	93.9				74.7	93.2	100
A0A287ICC8																																						201.8	320.7	298.1							765.5	674.1	631.6
F2CW71	73	118.3	119.2	190.3	208.7	119.1	129.6	127.3	113	100.4	89.3	150.5	150	120.7	34.8	30	39.5	128.8	121.9	140.7	159.8	203.8	128.1	30.1	33.5	28.1	141.8	164.8	154.4	185.4	75	148.6	142.5	185.4	176.6	134.9	163.4	163.3	159.6	103.3	149.1	189.8	171.3	106.3	158.5	76.2	73.5	97.8	92.1
F2CZB1	140.4	150.3	321.5					92.1	100.7	127.7	111.9	129.6	138.2	119.9	107.6	71.1	151.7	97.7	239.7	196	154.4	223.4	260.5				118.8	120.7	90.9	103.6	96.8	140.9	398	214.1	106.6	129.5	118.7	122.8	85.6	140.4				92.6	196.5	137.8	74.1	121.9	84.6
A0A287RN20																					135	112.8	104.2									104.1	184.3	163.2										55.9	79.1	69.9	237.2	134.7	203.6
A0A287V378	128.4	154	219.5			140.6	143.9					57.1	68.5	67.5	57.1	68.7	76.9				288.1	211.7	231.1	255.7	277.5	199.4			185.6	189	188.2	165.8	92.9	145.8	110.3	118.8	115	69.6	89.2	134.1	107.1	118.9	150.4	282.8	304.7	252.2	265.5	207.5	344.5
A0A287NJV3				43.1	42										59.9	43.7	33.7				312.1	200.5	271	523.3	562.7	512	50.1	68.8							66.5	83.5	70.3	68.1	64.1	74.5				108.4	108.2	105.5	488.3	80.7	281.9
A0A287U138						170.7	214.1								84.1	90.8	78.8				269.2	333.3	392.3						235.4	265.1	192.6				222	310.7	249.6				152.8	169.8	153.4				529.4	496.9	517.7
A0A287L8Z5																													333.9	307.5	318							292.7	251.2	302.4
A0A287EQZ4	107.5	132.4	121	123	120.1	100.8	97.4	127	88.3	72.1	79.8	173.2	146.8	95.3	123	102.6	112.7	93.4	134.2	184.5	79.7	147	135.7	63	96.7	81.4	99	132.6	55.8	131.3	60.5	113.5	119.6	90.4	90.7	88.5	124.5	97.3	104.9	73	86.3	109.8	98.8	123.2	151.9	130.5	80.3	92.2	117
A0A287JJB6	103	116.1	81.7	131.3	92.1	115.5	126.5														523.7	543.1	471.3	319.6	353.5	372.4			136.9	150.2	131.9																567.5	526.6	489.3
M0XW49	137.2	78.6	100.7	94.7	93	70.1	69.6	56.9	52.5									55	48.2	55.4	109.1	123.4	47.9	79.1	78.7	77.7			78.3	155.3	161.6	141.9	167.3	84.5	57.4	103.6	93.9	104.3	79.8	73.7	78.8	73.9	82	144.4	151.2	139.6	265.2	241.4	204.1
A0A287M7M1	91.4	157.6	155.2	150.7	131			169.9	141.2	75.5	88.7	106.5	119.5	78.6	194.9	117.7	99.1	109.8	141	145.9	123.9	142.6	158.2	86.9	71	70.5	154.5	211.7							81.6	143.5	99	482.9	56.1	331.5	109.9	63.1	108.5	110.9	97.3	107.7
A0A287KFD1	96.3	226	74.8	35	105.8	130.4	164.9	66.4	136.7	113.6	90.8	126.2	110.3	122.4	69.4	100.4	90	96.4	145.7	100.1	75.9	74.1	143.7	43.4	105.7	47.2	57.8	72.9	39.6	57.3	45.2	54.9	112.3	77.6	104.5	106.2	65.1	104.8	83.1	46.3	101.9	156.9	146.8	101.4	225.1	53.6	62.4	100.1	117.5
A0A287JYH6	71.7	98.9	93.1	67.1	146.2	69.4	118.5	96.3	53.5	128	107.4	130.9	119.3	103	115.6	104.9	129.9	151.6	191.7	137.2	52.8	103.9	100.6	96.5	127.1	55.4	118.8	121.2	90.2	207.7	58.6	117.5	157.4	86.7	74.8	101.1	104.4	195.3	68.8	93	110.7	86.9	117	55.4	172.8	86.3	45.1	70.1	79.3
M0X743	137.8	165.1	149.5			71.5	95.1								43.2	56.5	68.3	91.8	66.5	130.4	334.6	383.5	243.1	334.4	253.1	183.1			201.1	192.7	175.7				172.1	178	180.5	69.7	55	81.1	41.8	36.6	27.3	107.9	99.4	103.7	195.8	211.2	194
F2CUI6	61.1	54.2	59.1									74.6	87.8	100.9				104.1	107.9	116.3	83.1	81.4	122.6						66.9	74.8	70.9	63.7	94.2	80.8				86.7	74.6	77.5	76.8	73.1	84.5
A0A287KSU3	66.3	83.4	91.9	101.2	85.5	94.9	97.1	117.3	97.4	71.9	45.1	38.9	55	44.2	181.3	151.7	122.6	92.7	75.4	74.7	233.9	122.4	268	78	64.8	76.8	86.9	68.2				40.2	37.6	86.9	55.3	43.6	39.6	59.9	102.7	50.9	102.6	121.1	87.8	63.6	54.5	52.2	97.1	166.8	127.8
A0A287H7K2																																406.4	257.8	302.3													351.6	321.7	237.4
F2DM06	94.3	80.6	16.6	68.3	141	77.4	165.4	115.8	163.9	117.1	42.9	80	136.3	97.3	170.4	128.4	105.2	45.2	108.1	65.3	33.9	97	172.6	37.1	103.8	77.2	75.1	134.4	93.2	83.8	49.5	78.5	147.9	170.1	116.3	78.1	78.1	58.6	79.4	33.8	84.2	171.7	93.4	44.5	127.8	33.6	141.5	74.6	186.9
F2CQW1	268.4	473.2	243.5			192.8	128.4								103.5	84.1	54.4	116.4	78.1	139	249	83.4	162.9	199.3	202.7	162.4			308.1	119.6	107.7				113.2	297.5	76.4	302.6	113.7	300.4	89.6	94.4	28.5				373.3	271	87.6
F2CXT5	232.3	187.4	225.2	163.3	167.2	52.1	52.8	145.9	116.2	113.7	83.2	51.3	52.4	45.9				136.3	172.8	142.3	121.9	120.5	122.8	78	71	55			150.4	129.5	140.1	46.2	45.5	29.4	87.3	70.8	57.1	207.6	140.9	133.2	134.3	124.1	110.2	34.9	37.3	30.2	44.7	47.9	44.5
F2DWF0	73.2	78.9	50.6	42.4	70.1	84	109	34.9	80.7	144.9	85.4	58.4	72.6	97.8	42.8	153.2	65.5	52.5	96.2	114.8	70.7	50.5	67.2	80.8	81.9	76	96.7	53.7	74	99.7	72.1	34.9	70.6	50.3	125.4	73.1	63.7	41.9	131.8	45.7	85.2	123.9	93.8	141.5	215	146.3	110.3	82.8	200.6
F2DC91	134.2	132.7	150.9	151.5	107.1	98.5	120	143.5	116.6	73.8	131.7	82.3	156.5	94.7	125.9	88.6	88.2	78.8	70.8	69.3	83.3	130.4	142.8	137.5	119.4	92.6	145.7	116.6	132.9	143.9	137.6	101.6	89.3	113.1	83.1	138.9	79.3	79.9	73.6	44.8	79.6	89.9	144.4	96	37.9	91.2	86.9	56.3	40.2
A0A287TZQ9	399.7	319.5	352.2
A0A287QRJ0	156.8	74	174.3	189.3	199.7	47.3	79.4	240.9	124.6	101.3	96.1				168	79.1	61.7	54.7	60.8	52.9	86.9	244.7	108	49.5	41.4	61.2	163.1	119	60.8	138.1	207.3	249.8	183.7	104.9	46.8	28.8	40.7	111.4	111.4	130.1	111.7	85	201.2				115.3	159.1	69.6
M0XWD1	151.4	157.1	183.1			205.2	177.7	210.8	221.2			427.9	366.8	436	214.6	189.2	203
A0A287WQ00				121.3	104.6																274.1	230	344.5	572.8	433.8	424.7			242.8	200.3	186.2										93.3	118.8	143.7	130.5	101.3	140.4	216.3	154.8	186.8
A0A287ISE4	130.4	131	73	115.5	142.3	74.8	157.7	121.3	145.9	202	139.6	119.3	99.7	117.9	103.5	100.6	134.4	89.8	115.8	92.6	112.2	73.8	81.1	68.7	120.8	60.7	100.5	158.6	76	105.7	120.3	91.2	125.9	71	81.5	71.6	75.9	102.7	80.9	94.2	65.3	138.9	199.2	94.8	128.1	80.9	70.5	77.4	133.2
A0A287F348	335.2	236.8	411.5									207	141	207.2							180	198.5	201.2	244.3	179.3	252.9	295.8	238.1	327.9	317.2	197.3				236.3	406.2	217.6				135.3	119.9	148
A0A287TFH2																																						2100.4	1648.9	1520.7
A0A287RAA9				209.2	173																											200.7	224.6	227.3							167.7	156.8	158.6	246.1	211.2	287.4
A0A287KZH5
A0A287UM54	92.7	107.1	99.1	54.2	82.3	36.5	37.9	130.5	164.5	86.3	35.9	75.3	171.5	126.1	93.3	125.7	149	119.5	81.5	75.1	64.5	55	52	99.1	93.7	155.3	102.6	179.7	45.4	68.9	67.4	56.3	55.1	56.7				166	278.2	126.4	44.8	69.1	23.4	75.6	68.3	68.2	99.5	94.6	122.4
A0A287EKJ9																		252.5	228.7	267.6	196.9	216.9	195.7						115.9	149.7	202.9							202.8	233.8	200.8	491.8	400.9	362.4				161.8	156.1	235
F2DS83	149.2	145.9	102.4	55.3	96.4	186.7	204.3	48.5	71.5	100	67.8	74.8	50.1	87.6	78	80.1	69.6	204.6	194.9	178.1	62.6	58.6	89.3	109.1	127.9	119.2	41.9	62.5	75.9	48	38.4	193.3	203.1	221.2	75.6	70.3	31.2	232.4	131.6	122.3	98.1	46.8	132.6	87.7	75.7	106.1	103.5	63.2	77.2
F2DSK3
A0A287KZG1	143.6	81.9	81.3	112.6	46.7	103.2	82.8	84.1	103.6	57.1	67.4	196.7	75	72.5				39.2	95.8	76.9	55.6	112.4	62.8	84.5	51.9	72.9	124.1	84.6	57.3	65.9	63.9	113.1	121.8	109.7	57.4	57.9	65.9	107.5	99.1	116.2	67.3	94.1	59	87.6	143.6	137.7	69.4	109	136.8
C3W8M2	231	392.2	219.6	155.6	52.5							585.2	743.7	666	343.3	113.1	429.2	42.1	258.6	354.9												123.2	142.9	108.5	92.1	77.3	84.2	154.7	181.4	150.9	112.6	88.1	112.6	24.6	26.4	22.9	45.6	105.7	77.9
A0A287SXK5	334.1	284	407.5																		426.5	515.8	119.5	380.7	362.5	494.2									250.1	360.9	280.9
M0V3S6	114	93.8	113.8	168	141.1	86.3	97.2	70.9	90	74.5	55.1	81.2	78.6	56.3	118.6	71.1	78.2	46.5	197.2	144.8	78	164.6	171.6	40	69.6	42.9	125.2	67.1	84.3	53.7	87.3	156.9	146.9	118.5	78.6	92.9	146.2	207.4	60.4	109	96.9	84.8	136.4	126.9	139.7	99.4	52.9	43.6	67.7
F2D424
A0A287LFH3	152.7	98.7	97.8	119.2	82.6	105.6	69.8	173.7	129.9	92.6	136.6	217.4	132.2	143.6	31.5	67.2	78.7	74.3	202.4	143.7	174.5	103.2	100.7	76.6	79	48.5	122	137.7	91.7	144.4	126.7	151.2	190.7	212.4	46.4	86.9	90.9	115.8	89	124.5	102.1	39	60.8	81.7	87.8	59.4	84	126	88.8
F2CQU0
A0A287U642	33.7	45.3	54.4									47.7	56.2	53.3	78.8	52.5	50.7	141.2	138.9	83.1	111.5	77.2	57				62.6	70.5				201.2	164.3	194.3	66.6	46.8	51.9	78.1	112.8	76.3	61.8	59	63.2	99.5	163.3	77.1	302.2	258.5	241.2
F2DR72	77.7	46.1	73.4	66	50.4	68.5	49.8	53.2	65.2	42.1	44.2	53	37.9	44.5	76.2	110.1	52	59	59.4	54.4	141.1	167.9	183.9	155	49.1	124.5	111	67.7	56	58.8	55.6	76.3	61.8	51.8	64.7	39.1	54.3	155.5	234.4	62.8	106.9	157.9	20.5	80	52.5	109.3	165.7	48.7	243.9
M0WPZ4								39.6	45.5	379.1	305.1	232.3	372.1	134.6	152.2	54.8	119.4	145.9	139.4	140.3				105.7	110.6	138.4	124.1	127.7	90.9	107.8	128.1	171.8	221.6	102.9	52.2	68	89	269.9	56.7	175.8	61.9	69.4	82.1	92.4	86.5	89.9	60.5	75.2	89.8
F2E3I1	54.6	50.8	43	118.7	105.9	53.4	68.5	78.6	62.9						86.7	103.9	112.6	215.4	212.5	165.3	81.6	41.1	67.1	92.6	86	83.6												96.1	104.1	96	36.3	39.1	32	84.2	88.9	108.4	95.4	51.4	55.8
A0A287P5J8	82.5	103.8	98.3	135.2	149.5	154.2	135.5	120.9	127.2	140.7	158.4	220.9	100.1	87.7	88.6	149.1	87.2	103.5	78.2	131.6	123.9	116.3	132.7	80.2	161	145.2	103.9	175.1	76.1	82.9	95.8	71.2	46	89.4	91.4	71.5	85.5	140.9	138.6	189.2	95.4	78.7	102.9	209.5	264.1	128.8	160.3	110.8	123
A0A287U3G9	101.7	459.1	275.5					327.8	302.4			76.7	84	76.8	352.1	284.8	246.8				120	103	66.6				92.6	111.5										216.9	147.3	250.6	319.4	293.4	252	152.6	157.7	121.9
A0A287S9I3						121.3	107.1					116	115.3	88.9				109.2	121.2	72.6	51.1	65.8	49.1	44.7	56	56.2						76.8	88.9	94.1				71.3	102.6	91.5	115.9	122.6	123.1	96.2	66.3	100.5	40	176.4	175.6
A0A287LFM8	56.3	99.3	64.8	55.9	79.7	66.1	72.4	84.5	79.9									85.8	85.3	62	108.5	103.3	107.1				229.1	98.4	129.9	125.2	123	94.3	74.2	95.4				143.2	129.8	97.7	685.8	568	528.4	98.8	192	80.1	111.4	110.4	165.7
A0A287EZS0	75.7	84.9	116.9			102.8	75.3					99	56.6	84.8	167.6	169	169.4	83.3	85.4	68.7				137.5	152.5	158.3						120.4	137.7	118.8				165.3	307.3	372.7	161.2	151.6	153.7				162.3	150.5	154.6
A0A287VA57	95.7	72	73.7	33.9	77.4	47.3	275.2	44.5	73.4	81.3	69.2	101.1	92.4	88.1	144.6	67.8	150.8	83	105.1	93	21.9	74.6	42.8	73.6	70.9	72.7	85.2	68.6	61.8	84.3	68.7	60	104.3	73.8	79.1	53.4	51.8	116	146.2	116.9	37.6	147.9	42.3	161.9	159.5	72.3	83.4	76.1	153.5
A0A287I7F7	142.7	121.8	65.3	97	77.9	59.6	64.5	44	80.6	52.7	65	83.2	96.3	70.8	68.7	73.2	102.4	69	79.9	48.3	83.8	76	59.7	73	74.7	72.6	84.3	67.3	52.9	69.2	118	77.2	55.1	73.3	73.6	55.7	63.5	90.9	147.1	70	91	135.1	43.1	68.8	48.8	100.6	114.9	70.9	85.3
M0UK15	24.7	42.7	45.6			27.6	30.8	166.2	173.4	2.1	6.6	186.7	174	220.4	29.1	3.1	17	32	128.1	75.8	351.3	175.3	204.2	389.1	293.9	285.9	42.5	42.9	51.1	3.3	31.7	48	147.6	71.7	83.7	22.7	131.1	29.8	32.8	33.9	258.4	213.2	79.1	61.1	167.5	265.6	497.4	337.8	83.5
F2DSR1								174	202.8			135.3	180.1	173.6	130	140.7	128.6
F2DBI6	65.4	90.2	101.3			188.6	148.3	118.3	126.2			169.5	71.9	144.9	97.3	77.8	78.2				261.4	162.9	174.2						148.4	133.8	124	111.7	52.2	91.9				131.7	116.1	103.3	103.1	131.8	127.2	45.8	71.5	58.6	124	80.3	83.2
A0A287Q8R5	109.1	87.6	171.9	51.7	43.9	134.9	159.3	83.1	98.8	61.8	100.9	88.3	117.6	87.3	62.1	46.3	60.2	93.5	97.6	77.1	178.6	124.9	139.9	132.1	116.9	137.4	104.8	86.8	106.3	125.5	190.6	160.7	90.1	112.4	109.4	165.6	133.4	73.5	101.6	74.3	88.4	78.4	41.2	200.9	140.9	144.4	127.4	117.5	86.7
A0A287SZD3	99.6	200.7	64.4	88	177.3	67.5	75.1	37.8	44.7	166.2	93.3	65	112	186.9	122.4	196.8	188.7	124.8	147	84.7	45.4	52.2	53.4	84.3	82.5	118.8	76.4	108.9	99.6	95.1	77.5	85.6	85.3	117.1	121	145	84.3	38.3	61	49.6	90.7	105.2	114.4	86.5	80.3	90.6	168.2	259.2	233.5
A0A287NZS4																					502.8	401.8	372.9	408.2	356.9	191.6									692.8	516	536.9							372.7	212.6	348.7	904.5	1082.9	1147.4
A0A287MEB9
F2D3W7	27	67.7	45.2	34.4	42.1	112.6	50.1	46.8	71.7	189.8	167.1	143.2	52.4	90.7	38.9	92.3	45.6	34.5	39.7	35.4	69.8	59.3	48	189.7	239	289.1	127	107	304	229.9	183.9	174.4	160.3	112.3	67.8	35.5	55.3	136.1	185.8	121.3	117.3	102.1	123.3	189.1	212.2	183.9	71.2	30	150
A0A287WJQ6	238.6	163	196	305.8	343.9			203.6	155.7			100.5	155.4	148	209	225.8	169.4	322.6	211	251.2	229.4	327.1	379.9	82.4	68.3	68.4	145.6	150.3				78.6	58.2	64.1	220	224.6	240.2				182.5	122.1	195.3
A0A287RHB1	137.9	130.5	103.3			120.8	118.3								88.5	117.9	149.1	107.9	108.8	532.7	181.6	147.9	144.4						288.7	146.3	162.1	118.4	122.4	102.9	363.1	131.7	212.5	81.9	85.9	133.4	93.6	82.1	128.4	185.2	132.2	119.9	117.2	240.6	83.8
F2EKV4	120.3	108.1	56.5	43.1	35.8	133.7	120.6	60.4	60.3	71.9	62.5	76.3	77.7	61.1				155	176.7	138.4	46.5	52.6	39.7	30.8	31.5	30.5			133.5	72.7	128.8	89.4	90.8	77.3	86.3	130.9	143.2	81.8	68.2	113.8	137.7	99.1	145.7	197.2	344.5	306.8	58.3	80.2	76.5
A0A287JF15																					917.3	555.4	515.4												440.5	646.6	553.8
A0A287P333	203.9	14.6	19.9	17.9	16.3	12.9	15.3					269.4	12.6	200.7				184.4	209.2	213.7	46.8	7.4	61.3	44.2	35.5	35.4	28	19.1	19.7	18.4	263.8	411.2	96.1	545.6	24.3	23.3	30.1				114.9	96.8	80.2	143.6	459.6	478.2	129	249.8	202.9
Q8W516	57.3	89	60.4	71.2	77	36.3	99	62	92.1	191	124.3	120.5	185.4	182.6	142.3	196.4	162.8	138.6	72.1	130.6	121.2	82.2	94.2				137.6	116.8	53.6	87.7	69.9	82.8	64	85.3	32.7	30.7	34.8	106	132.1	60.6	67.6	51.1	79.2	67	52.1	68.6	57.8	42.2	63.7
A0A287JZ51	233	188.9	178	93	109.7	111.6	138.5								90.8	108.2	109.7				148.5	100.9	156.1				135.6	93.9	163.2	223.7	203.7	158.7	155.3	102.9				99.3	94.6	58.3	82.1	91.3	75.3	166.4	119.5	178.7
A0A287E9A7						213.6	345.6														609.4	301.1	764.1						190.1	192.8	226.2													393.7	521.2	291	316.2	321	329.3
A0A287NNM3	285.5	409.5	172.1												243.6	252.5	248	275.9	267.7	319												106.2	171.3	142.5	318.9	261.9	378.5	236.6	372.2	467.5
A0A287QH10	148.5	261.5	203.8	860.9	453	197.3	557.9	129.1	128.7	302.5	362.1	161.6	155.7	132.1	188.4	284.5	116.7				243.8	707.8	268.6	131.1	105.2	134.2			186.2	250.7	93.8	382	499.6	430.7	102.6	91.1	97.1				339.9	283	227.6
M0XPS6	126	148.7	128.6	42.4	42.2	40	39.4					44	34.6	43.1	39.6	32	19	54.3	53.2	46.3	219.4	177.2	158.7	177.4	121.4	164.3																		144.6	123.8	124.5	171.2	152.9	177.2
A0A287QNY6	86.5	165	58.6	151.5	125.2	108.9	99.4	174.9	126.5	132	88	92.7	114.5	124.1	86.6	159.4	133.6	88.2	130.3	135.9	97.2	36.2	89.7	64.2	78.6	102.2	88.4	128.8				139.5	134.3	146.9	104.4	134.9	87.9	119.3	132.8	95.3	193.5	106.8	88.5	69.5	162.8	128.4	86.6	52	97.4
A0A287DTW9	60.5	42.2	59.6			74	93.6	67	60.2			82.4	77.2	51.2	28	58.8	73.1	77.3	93.7	78.7				146.8	65.3	164.5						429.7	207.4	494.6	67.3	59.6	52.3				197.1	190.8	266.8	220.4	352.1	229.9	87	111	66.2
F2EC17	68.1	47.4	63.3	38.7	38.4													84.9	76.5	63.9									79.2	61.2	63.4	74.8	64.9	57.9				36.9	46.6	57.7	39.9	59.1	60	75.9	52	45.7	63.9	59.1	60.8
F2DQ96	94.6	141.3	84.5	65.4	95.7	35	57.9	72.9	125.1	101.5	67.3	78.5	73.3	88.3	114.6	131.1	105.4	131.5	107.2	95.4	89.4	84.5	64.9	89.2	93.6	86	92.3	142.7	40.9	15.7	25.9	71.4	52	86.1	70.6	59.7	51.9	118.8	96.9	120.2	75.3	46.9	117.7	55.7	94.7	48.8	68.8	35	86.7
A0A287GJK1																																						380.1	539.4	366.4							600.6	906.7	781.7
A0A287PVR9	248.9	140.3	183.3					126.3	117.1			238.6	90.3	214.4	103.8	141	114.1	230	391	173.8							141.4	153.6	139.3	141	126.8	184.4	154.7	135.5				128.1	127	117.9	201.5	113.8	195.2	164.8	129.1	138.5	66.7	137.8	157
A0A287RSZ8	97.6	132.3	108.9	54.5	56.1			124.5	185.5	106.4	98				208.6	119.4	161.5							74.8	68.7	93.8	250.1	249.2	76.4	74.2	75.2	49.2	59	63.4	118.4	137.3	173.9	82.4	98.8	105.7	91.4	97.1	106.1	94.8	81.5	129.3	84.9	85.4	105.9
A0A287LNX8						175.9	167.4			167.7	130.9										394.3	239.8	378.6						218.9	154.9	162.6	206.4	188.6	126.4							82.6	84.5	75.7	163.6	188.9	230.8
A0A287X7Y0	114	123.3	136.5	108.2	81.7	104.4	101.3	38.4	42.1			45.5	47.2	43	64.6	59.2	51.8	36.7	38.4	36.8	285.8	148.5	283.4	191.6	224.9	176.2			122	146.6	146.2	115.7	117.1	111.4	122.5	110.9	125.3	153	127.1	128	103.1	108.9	78.6	130.2	151.2	119.7	191	193.8	120.5
Q9M6N6						1290.2	773.3																																					669.2	662.5	620.8	2449.4	1730.6	1817.7
A0A287JR75	179.3	159.6	136.5	86.3	147.9	134.4	126.9	67.5	59.5	108.2	114.9	107.1	83.7	117.1	139.4	90.2	132.3	76.6	56.5	89.8				112.6	127.9	126.8	120.4	129.3				49.8	54.1	60.3	100.5	153.8	87.9	205.7	223.1	207.6	61.7	29.4	95.8	67.1	49.8	35.5	49.7	29.9	37.7
F2DC79	432	444.9	212.3												85.4	122.4	136	199.3	327.8	283.2												183.5	226.4	204.6				263.1	200.2	277.6	174.2	273.5	233.3
F2CXP5	80.7	138.7	50.5	73.3	119.3			120.9	130.8	131.1	117.3	61.4	108.2	141	99.4	134	87.9	147.3	168.3	84.5	108.9	102.8	130.2	60.9	122.9	112.4	134.2	124.6	85.2	130.6	78.5	76.4	107.6	182.6	74.3	121.5	38.5	247.1	90.7	97.2	100.4	132.9	138.4	48.4	123.9	48	100	108.1	90.2
A0A287F6C3	70	99.7	86.8	82.5	108.1	70.4	68.4	123.2	88.8	115.5	84.3	203.5	121.6	94.9	180.2	86.2	88.8	74.3	125.5	91.6	64.4	108.3	96.8	50.4	85.9	47.6	64.8	83.6	92.6	162.4	138.6	97.5	117.2	60.3	82.2	120.5	146.8	196.3	82.3	114.3	86.4	77	109.5	128.8	197.8	86.1	78.3	55.2	99.4
F2E8Q1						207.3	218			173.8	194.3	194.6	209.7	189.2																														170.4	301.2	302.9	355	212.7	223.1
A0A287XBC2								131.6	76.3			229.1	108.4	33.2				42.1	253.8	80.6	66.9	75.1	33.8	44.3	40.4	57.9	118.8	32.3	124.2	81.4	180.6	57.5	88.8	97.1	18.1	24.6	19.9	64.3	56.4	68.9	46.1	166.7	79.6	137.4	264.8	124.6	47.6	68.6	78
M0VIJ4	99.6	120.9	136.9	94.2	131.1	180.8	155.7					159.7	144.9	217.8				169.9	181.8	124.9									85.7	169.7	254.6	161.2	212.5	210.5
A0A287PA58	74	150.5	89.2	231.9	175.6	126.6	132.7	93.8	140.1	130.7	70.9	107.2	87.7	98.8	94.2	80.6	76.9	67.7	58.2	57.8	75.2	48.9	37.9	79.1	89.8	99	160	138.2	127.1	136.1	88.4	116.9	42.5	132	41.5	42.8	32.8	94.1	27.6	32	82.8	74.2	47.6	32.4	26.1	26.4	74.2	123.2	193.4
F2EC97	94.9	150.4	94.3	89.8	121.1	59.7	67.7	97	166.4	93.2	101.4	80.6	210.3	114.4	76.9	92.2	134.4	128.7	73.5	96.4	47.4	68	49	56.9	101.5	156.9	107.2	161.4	69	114.2	51.8	38.7	75.5	86	54.7	63.5	51.5	96.7	285.2	43.9	57.7	118.3	65.8	61.2	74.7	58.3	87.9	59.9	107.7
F2DBW7	252.6	242.7	231.3	162.7	130.1	140.3	119.2	183.6	150.2			177.4	192.9	178.3	90.7	118.6	122.1	115.8	117.5	130.4							145.4	149.5							491.9	454.2	385.4				64.8	54.1	55.9
A0A287K2A4	112.9	53.3	80	74.5	85.2	72.9	67.2	113.5	95.3	133.8	114.1	136.5	136.7	115	72.7	100.8	101.2	87.5	260	122.5	39.2	94.9	65.7	70.4	80.2	66.7	73.7	168.2	65.5	66.3	73.8	103.1	208.1	121.4	68.1	140.8	161.3	101.3	176.1	101.6	55.3	174	59.5	78.4	154.1	135.2	88.4	85.7	97.5
F2DUC6																		36.9	35.3	34.5	114.6	55.2	130	182.9	139	207.1																		191.3	169.3	167.3	47.3	55.5	69.6
B0BKB1										150.2	145.5				110.8	69	138.5	129.2	102.6	105	380.3	354.1	393.6	112.4	136.4	80.7	165	171.5							250.1	245.4	224				102.4	85.2	87.9	133.9	145	167.5	209.1	247.7	261.7
F2DV27	71.6	68.5	68.7	125.1	122	82.1	67.6					69.3	103.1	48.9				81.9	67.1	68.3	66.2	161	117.8	90.4	88	64.4	96.1	85.7	85.7	102.7	42.8	93.2	95.9	116	57.8	74.7	75.5	99.7	86.7	111.2	115.3	194.9	105.8	76.8	77.8	74.3	74.5	55	130.6
A0A287X9T4	288	310.7	350.7	112	134.4	136.2	131	252.6	231.7			239.5	220.9	227.9	194.8	198.5	246.4	90.9	101.9	96.3	149.8	239	253.3				107.7	76.6				115	78.1	97	118.1	116.6	142.3							182.5	100.3	127	97.6	111.5	118.2
A0A287NKH3	106.4	106.8	120.2									317.1	253.9	329.1							70.7	78.7	75.7				178.3	164.6
F2D029						97.8	82.7	373.5	320.5																		145.5	144.8				261.5	326.7	243.4										142.8	150.7	172.2	313.7	351.5	372
F2CQI5	231.7	123.6	201.3	122.4	81.1	130.5	109.6					293.7	262.3	174.1	136.3	104.4	126.3				711.3	90.5	140.3	503.4	322	747.4	174.3	189	158.8	158.2	144				330.7	403.4	559.8	237.8	242.3	278.3	7.1	6.7	5.6				793.4	288.3	466.5
A0A287RDY1	126.2	121.7	119.6			360.1	259.4	282.1	351.2	246.1	211.4	325.5	373.3	253	118.4	87.1	179.3	209.7	221	261.6	84	94.2	80.6	53.4	208.5	117.4	254.5	271.2	70.9	79.8	126.3	61.9	45.8	66.5	89.3	82.6	98.7	181.3	134.1	84.6	112.6	97.3	193.6				119.4	174.6	159.3
F2D273				92.7	138.2			117.9	115.1	118.2	130				141.5	140.1	137.9	93.1	147.3	95.5				197.4	178.3	162.3	123.8	168.3	112.5	122.9	131.4	100.1	122.3	110.5										98.1	96.1	105.6	266.8	304.8	188.3
F2DU10	192.2	120.2	100.8			168.1	173.2	217.8	214.1			272.2	115.2	198.1	190.6	237.5	130.3	139.9	309.8	121.8	142.9	260.9	174									108	229.6	110.6				204.1	171.4	231.4	123.8	138.4	111.3	96.2	154.6	144.9	220.6	143.5	144.9
A0A287WWA1																					393.3	445.2	501.8
A0A287KWJ3	115.3	89.3	107.3	182.2	174	51.8	371.6	71.3	57.9	56.7	212.3	82.9	132.5	172.8	143.2	119.4	135	88.8	76	114	84.3	231.1	132.7	108.3	97.2	135.4	123.2	109	132.2	129	131.1	87.5	86	58	175.2	206.3	53.9	95.9	95.9	151.8	134.3	208.8	148.7	149.4	208.6	107.2	38.8	91	104.8
A0A287KYQ2	125.8	126.4	130.5																										139.5	201	170.4	145.6	120.4	164.3				211	178.9	201.2	120.6	234.3	217.6	217.7	183.7	135	169.2	140.7	124.6
A0A287RSN6
A0A287K0A3				103.7	104.1										339.5	112.1	139.3												184.8	254	236.8	113.4	93.8	99.2	42.8	116.1	92.1	300.8	319.2	308.1							358.5	255.9	269.8
F2E698	175.2	182.2	173.1					110.1	70.4			207.3	109	90.7	84.8	118.5	121.1	86.4	118.5	344	138.4	135.4	200.8				99.1	153.3	748.8	219.3	466.4	96.9	95.7	128.2	104.8	67.3	76.2	95.4	87.6	95	235.5	111.6	71.1	150.6	122.4	95
A0A287J037	243.7	294	166.2	327.9	289.9			116.6	206.4	115.9	119.8	111.4	91.8	69.5	116.8	64.4	138.7	279.2	134.2	133	251	85.8	122.3	124.2	77.2	64.8	76	324.1	69.9	120.6	130	111.1	109.9	99.1	215.3	191.5	212.9	237.5	121.7	103.1	76.1	125	222.9				127.5	90.4	50.3
F2DQZ3	100.1	167.6	148.6	228.4	230.4										216.4	254.8	95.6												238.7	267.9	238.1
F2CTW7	78.6	94.2	180.8	66.3	103.3	90.5	181.7	78.9	63.8	74.1	67.6	66.1	32.8	104.5	37.9	101.2	46.9	144.8	83.5	96.3	283	74.5	194	217.3	59.8	146.2	109.8	68.7	131.3	52.5	123	100	86.6	94.7	94.7	100.5	56.6	66	67.9	93.5	50.9	50.8	44.2	167.9	155.8	192.8	176	108.9	56.6
F2E789	172.8	160.2	206.8	106	98.7	28.9	47.2	152.3	129	144.3	151.3	67.4	55.8	99.6	233	92.8	97.2	63.5	77.9	80.2	39.5	78.3	122	98.7	105.2	140.6	78.9	120.6	63.7	57.4	53.2	73.5	107	48.6	103.9	111	146.2	88.7	74.1	94.8	101.8	104.9	100.7	119.2	89.2	95.4	34.7	19.5	27.3
F2D2K5																																1263.8	681.8	1085.2	725.9	681.1	558.8
A0A287KLM6	65.4	84.6	61.3	65	107	108	102.6	54.4	134.2	149.3	139.4	104.3	92	70.7	134.8	176.3	135.8	129.8	76.3	125.2	82.4	87.7	118.8	74.5	108.5	121.7	109.5	59.4	123.9	100.5	90.5	56.4	98.6	97	138.8	112.2	112.9	86.7	118.6	138	103.2	70.2	167.1	105.6	179.8	102.3	52	42.8	137.6
A0A287LZU1	100.2	68.4	64.5	125	54.3	111.5	78.5	126.2	114	71.9	119.3	184.4	113.2	163.7	111.8	65.3	54.7	131.7	107.5	134.7	46.4	86.7	104.8	133.7	103.8	131.9	58.5	49.7	64.9	68.4	83.6	120.1	126.1	108.6	78.4	75.5	235.7	94.6	82.4	98.3	127	124.3	102.1	73.5	119.3	124	56.4	77.7	84.8
A0A287U4U9				130.7	157.8	164.1	192.9	204.4	185.5			302.4	180.3	265				159.5	146.3	154.2				145.6	108.6	125.3	118.4	125.4				276.4	273.8	245.9										181.2	145.5	216	190.1	159.3	94.4
A0A287NU14	48.2	48.4	53.4	65.3	69.4							91.9	60.2	41.3	320.3	291.7	294.6	40.1	58.9	70.1	115.4	82.9	153.8	178.9	246.9	117.4						67.6	60.4	56.4	56.1	55.9	61.7							259.4	188.2	242.2	171	183.9	206.5
F2E3X7	143.8	66.9	143.4	335	419.3	164.4	210.3	245.6	117.7	238.6	236.5	228.4	419.8	196.5	71.1	70.9	139.5	171.5	289.4	343.3	132.1	301.7	493.1	211.9	335.8	175.7	248.6	134.4	174.4	215.5	130.9	300.6	446.7	307.9	191.6	103	196	62.3	64.4	59.5	241.2	210.2	308.6	124.8	125.1	78	66.2	112.2	83.3
A0A287QS95	115.5	65.6	88.9	80.1	74.3	147.5	196.8	243.6	253.3			70.2	78.3	82.3				35.2	213.1	122.5	66.3	112.3	104.7				116.8	129.4	165	274.4	131.4	23.4	176.5	130.5	38.1	49.1	62.4	79.6	106.6	85	83.4	117.4	123.9	135	152.9	113.3	45.3	75.1	134.4
Q8GT52	92.2	95.4	114.6					122.6	124.1	43.5	48.8	96.6	106.1	118.5	189.8	88.6	97.7	32	24	32.1	103.3	146.1	221.1	127.9	93.5	133.5	118.1	138.1	29	29	27.6	193.9	283	405	81.7	120.7	77	160	277.7	177.8	121.1	128	116.4				61.2	28	40.8
F2D875	220.4	303	185.9	341.8	402.5	226.7	254.2	538.3	633	278.3	215				240.9	100.8	220.8				171.7	152	226.9	175.4	230	251.7															414.8	433.2	355.1
A0A287I2B5	53.5	130.4	45.1	57.9	101.7	96.6	137.2	85.7	163.9	156.6	194.3	70.8	121.4	97.4	67	148.3	119.5	75.1	127.2	108.2	57.8	58	41.2	102	114.8	124	101.3	134.9	159.8	166.7	61.1	45.8	62.2	124.9	81.6	88.5	72.6	56	112.5	86.2	54.1	102.4	53.2	121	170.3	140.8	99.9	115	228.3
F2D652	126.4	254.8	170.6			124.7	87.5	205.9	177.2						159.5	146.2	309.9	176.2	161.5	243.5				146.6	107.4	99.7	113.4	212.7							276.8	320.5	246.8	231.5	273.5	110.4							67.4	63	70.8
A0A287J8Y5	107.7	88.6	81.2	88	72.6										146.7	126.3	93.3	122.4	134.2	127.3				78.9	70	68.5						100.2	116.7	123.7	86.9	141.7	87.5	145.1	206.1	121.4	52.1	79.9	89.5	352.3	188.2	74.7	100.8	124.4	98.4
Q9S8N1	60.4	126.8	118.7	113	127.6	181.6	123.9	166.7	128.5	162.1	99.1	111.4	175.8	121	168.8	96.6	112.7	88.6	136.8	99.5	51.7	79.7	120.4	53	97.5	57.7	73.6	100.5	113	113	44.3	46.6	89.7	100.6	108.8	148.9	173.9	175.6	57	54.7	78	68.5	138.4	50.5	125.9	64.9	36.3	91.3	82.7
F2DI16	87.9	119.5	115.6									150.4	78.9	176.2	172	288.6	151.9										214.9	216.9										224	155.1	177.7				174.1	199.6	164.1	130.4	134.8	148.6
M0VXY0	177.7	135.8	81	73.5	137.1	203.9	42.2	79.2	191.9	152.1	167.4	178.7	64.1	86.6	146.4	119.3	84.5	109	86.9	112.5	48.4	66.4	56.8	54.7	125.2	93.6	127.2	146	73.6	117.8	222.6	131.4	125.5	109.3	109.3	117.2	53.6	94.4	192.5	99.6	46.4	134.5	143.1	146.3	89.4	90.4	95.6	64.4	67
A0A287SNR6	110.6	63.7	121.3	119.1	120.8	141.3	39.9	57.6	54.4	91.3	81.3	66.6	86.1	95.1	44	85.8	23.4	107.6	66.1	69.6	269.3	123.1	75.4	215.6	25.2	181.6	84.8	74.5	161.6	126.5	178.4	175.5	120.9	97.2	108.2	145.2	106.1	81	112.2	170.8	140.2	110.3	96.5	180.3	87.8	190.4	206.8	167.8	91.1
M0WPP4	303.9	380.1	342.3												236.7	279.1	223.3	250.6	227.2	245.5	677.7	322.8	333.3	602.9	681.1	567.6			127.4	285.7	197	227.2	278.9	317.9							177.4	274.7	285				276.4	373.4	324
A0A287KQU1
F2DLC9	97.6	100.9	98.6	115.5	137.5							153.9	140.7	184.8	123.5	169.4	123.1	96.9	167.6	132	107.7	98.5	173.4						127.8	134	162	204.9	218.7	248.3	163	142.6	115	77.6	53.7	54.1	248.1	245.5	195.1	121.1	117.6	134.4	140.9	160.2	152.9
A0A287TWD1	101.2	121.1	95.1	149.6	171.9	90.6	137.4	76.1	112.7	104.5	43	152.3	58.7	96.9	137.4	161.7	175.3	95.8	104.4	78.5	200.3	158.8	115.3	67	58.2	72.1	46.5	198.4	86.9	120.8	80	82.1	151	169.9	127	173.7	85	169.9	149.9	159.1	114.9	76.1	73.3	126.3	26.4	68	92.2	90.1	74
A0A287I6S0	228.5	156.6	204.5			255.1	252.8	242.8	281.5									95.2	131.2	86.1				70.1	62.1	75.6			189.4	194.1	302.4	262.9	277.2	173.7										347.5	282.9	317.2	161.5	118.3	101.8
A0A287E3R9
A0A287LV07	118.3	81	41	38.3	33.4	127.4	110.6	97.7	75.7			149.9	68.1	64.8	49.5	50.3	55.1	39.2	121.4	65.8	58.6	50.6	50.3				62.6	66.6	114.5	152.4	75.3	115.6	115.1	134.4				120.7	124.8	100.8	118.5	129.5	151.4	101.9	125.2	65.8	165	144.9	103.5
M0XC79	192	162.9	160.3					183.8	250.9			175.1	178.3	158.2	214.4	193	229.5							138.2	140	137												264.8	142.3	196.9							153	189.9	164
F2CRM7	110.7	49.7	73.5	177.1	79.2	197.3	55.7	314.5	106.4	117.9	196.1	110.6	96.9	56.1	50.7	54.8	59.5	57.7	112.7	113.2	179.6	316.7	265.7	49.9	95.1	47.1	42.5	62.1	63.8	264.4	125.4	170.4	302.2	140.4	91.1	74	206.5	101.9	38	113.4	128.7	125	67.4	183.5	279.4	171	65.3	55.7	118.8
A0A287EBD3	112.3	120	164.9	132.5	98.5	202.4	151.7	40.3	60.4	87.1	82.7	113.4	124.4	147.6	110.8	146.1	99.5	55.7	30.6	28.2	348.7	87.2	311.1	304.1	264.2	221.2	107.3	151.4	52.4	35.4	27.5	28.1	24.7	21.6	144.3	182.5	159.6	40.2	67.3	23	149.7	103.6	113.5	87.6	32.3	78.6	228.1	209.7	161.2
F2D2B6	204	66.9	52.9			48.4	57.6	169	89.3			70	314.7	186.5	49.4	88.3	150.6	84.9	89.3	84	78.5	62.6	38.6	69	167.3	90.4	160.4	370.5	146.5	75.1	85.1	297.7	240.1	102.4	133.3	67.4	106.8	67.4	155.8	62.3	35.4	88.4	56.8	116	103.2	143.6	32.9	69	24.3
M0WC90															89.2	111.3	87.9				184.9	99.8	157.1									142.1	125.9	165.1				234.6	198.2	229.6	65.5	53	61.3				53.2	40.1	38.5
M0UJC9						210.2	213.4																												256.4	208.7	158.6
A0A287JBF8	66.6	139	97.3	108.1	90.7	84.1	83.7	148.6	79.3	89.5	66.9	82.6	144.5	130.5	94.3	74.6	75.5	42.8	151.4	100.3	108.2	182.2	106.8	57.5	69.4	173.8	50.6	117.2	421.6	845.2	466	132.5	90.6	194.7	89.7	49.9	106.4	56.2	55.6	81.7	49.6	51.4	98	78.4	72.5	75.4	84.7	77.6	58.4
A0A287RSS8																					591.4	718.6	596.5	184.4	238.4	136.6																					333.7	323.8	285.1
A0A287LT41	96.6	107.5	64.2	108.4	96.4			105.1	128.4	61.6	98.4	67	85.9	78.1	96.4	92.6	61.5	79.2	98.9	87.6	69.6	112.6	161.7	45	70.6	46.4	80.5	96.8	101.7	104.8	72.1	74.9	141	152.8	111.1	80.3	82.5	82.6	76.1	138	67.7	94.1	85.1	61.9	71.2	91.9	50.9	71.7	76.6
A0A287MAN7	60.3	84	79.3	68.8	100.2	29.6	47.6	53.9	41	44.3	98.8	92	101.6	39.1	31.9	14.7	47.5	77.8	121.1	74.4	35.3	122.5	82.1	34.7	45.3	31.2	74.9	84.8	18.6	145.4	86.3	88.4	121.4	194.6	56.6	85.3	98.9	222	134.2	33	53.2	87	80.1	125.9	72.8	124.7	67.1	82.6	112.6
O49872	164.1	135.2	181.9	80.6	89.5	169.6	165.3	124.6	114.3	119.6	98	93.4	81.4	90.8	96.1	95.3	112.2	91.4	68.3	93.4	135.4	162.4	85	149.3	54.8	84.7	67.7	59.5	123	90	158.7				137.2	282.6	202.9				28.4	44.9	53.1
A0A287F8Z7	81.2	112.5	67.2	111	102.1	106.4	76.2	95.9	74.3	112.8	117.4	97.7	117.6	149.7	148.7	76.5	119.6	76.3	158	139.7	96.1	68.6	94.2	67.2	101.2	61.7	97.9	80.5	118.8	98.5	105.7	38.5	94.3	57.7	81.7	138.5	126.5	186.9	172	123.5	105.6	80.2	122.7	141.4	188.7	79.9	62.6	112.9	62
A0A287E7Z5
A0A0K0YH82																								306.8	216.9	210.3																					396.9	380.6	373.1
A0A287U5N0				154.4	173.1							103.5	177.8	141.6																								209.7	259.7	255.2	325.3	122.9	232				143.6	168.3	145.9
A0A2C9NIC5																													413.5	417	455.3										144.2	188.7	203.2	714.9	403.7	212.1	926.5	1255.6	904.9
A0A287VJK9																					310.4	340.3	302.6	278.1	258	335.1
A0A287GI21
A0A287LY20				396.6	407.8			1309.2	1099.4	566.1	479.2				506.5	401.9	461.3																		490.8	535	583.4
A0A287WMV2
F2DT83	42.7	78.6	54.7	168.4	249.4	109.3	92.3			213.5	266.7	46.3	38.1	44.1	142.2	147.1	129.3				132	177.8	211.4	177.4	194.3	202	223.1	260.2	54.1	46	49.1	204.1	233.9	195.7	155.5	125.5	189.7				28	28.3	19.1				126	136.6	93
A0A287N2U4	170.2	141.2	76.8							111.6	98.5	164.1	77.5	126.8				126.3	99.6	94.8							84.6	190.1	98.9	105	73.4	114.3	106.8	134.9	92	86.4	94.6	174.2	155.3	117.9	110.3	87.2	90.3				140	100.6	121.8
A0A287V1M7	98.1	76.2	78.3	79.6	128	69.4	87.3			88.8	94.5	107.8	82.8	73.1	118.4	71.5	96.6	102.6	139.7	140.9	70.1	81.5	104.3									89.3	81	98.6	112.4	138.1	86.1	94.8	89.8	81.5	91.1	122.3	120.1	59.8	83.4	85.6	122.5	88.7	121
A0A287UAM7
A0A287JVF9
M0V1S6	89.2	97.2	78.4	152.5	123.4	172.3	176.2	114.1	152.5	199.6	152.4	180.4	126.6	160.7	170.1	278.7	151.3	151.8	121.7	98	166.9	74.5	71.8	116.6	143.4	153	87.3	167	125.6	114.8	133.5	75.1	74.5	83.1	122.5	46.2	60.4	79.1	90.9	49.7	86.2	93.2	83.2	88.8	94	62	112.8	137.5	163.3
A0A287QMI7															158.1	109.5	46	157.6	124	85.4	374.6	555.4	267.8	224.7	253.4	248			102.7	100	124	102.7	112	130.2				74.8	134.5	140.4	159.9	133.6	142.6	179.9	176.6	222.1	385	152.9	188.2
A0A287W1K5	38.6	111.9	69.5	86.8	116.3	43.1	25.8	81.3	192.5	115.3	132	94.7	115.5	162.7	74.8	180.5	103.9	171.3	115.8	150.6	474.7	57.9	64.8	328.7	146.4	321.6	76.5	166.9	286.9	355.9	394	77.4	87.8	67	184.2	246.1	248.1	105.4	80.6	73	54.7	45.4	90.9	64.1	75.1	90.1
A0A287XBP0	118.9	122.7	174.4	153.3	158.2	110.3	92.5	109.4	90.2			90.7	107.2	116.6				112.7	120.2	93.9	311	191	225.2	146.9	130.2	189.7																		241.3	163.5	143.9	289.1	208.8	224.9
Q96565
A0A287QHH5				38.1	49.3	72.2	55.2	33.5	104.9	121.4	73.7	61.5	62.9	82.7	256.1	322.3	317.2	220.5	84.6	50							93.5	111.8	47.2	188.1	73.8	79.9	63.6	80.4	47.6	58.7	45.8	269.5	56	51.9	75.6	89.1	92.2	41.3	48.6	28.1	166.3	52.7	73.6
A0A287QZG2								387.7	510.3						279.1	198.1	279.3										280.3	197.8																			359.1	303.3	315.8
A0A287LG02	275.1	297.3	280.1																					132.7	168.6	232.3			232.5	194.9	164.6				323.7	262.8	288.2				327.8	316.9	240.6	224.8	153.7	265.3	181	275.1	221
A0A287VH28	124.2	77.2	102	149.7	185.8			129.4	89.1	59.4	60.3	171.7	106.3	120.3	52.8	49.9	52.4	95.5	212.4	97.2	97.7	131.7	145	39.2	35.4	34.6	73.7	132.7	43.6	35.4	41.4	79.2	182.2	92.4	41.9	45.9	34.5	120.8	87	39.3	159.6	168.4	159.7	14.9	26.6	25.8	63.7	112.2	86.1
A0A287UZ04
A0A287TEE2																													186.1	161.4	133.1										253.9	234.9	266				105.8	103.1	107.9
A0A287NXW9	96	144.3	82.7	143.1	144.9	123.2	162.5	141.5	135.5	186.3	150.4	97.1	189.8	138.3	55.5	107.8	122.2	131	122.1	140.1	107.7	105.2	63.7	99.7	115.1	96.4	108.6	187	130.1	146.7	92.4	85.1	146.2	164.7	80.2	57.6	54.9	63.1	106.8	83.6	160.5	173.6	103.5	92.6	97.2	108.8	125.1	129.1	160.7
A0A287RAP4	78.4	91.4	91.4	118.8	160.1	102.4	87.9	182.6	99.3	69	68.1	132.4	123.7	106.1	159.6	101.3	84	67.7	64.3	72.4	162.5	168.3	231	87.3	133.3	83.2	117.3	148	82.7	87.4	55.3	80.2	99.6	167.2	106.9	140.5	135.9	134.8	37.5	81.5	151.8	58.5	135.8	78.9	116.1	106.2
A0A287EX42	230.4	53.5	68.9	58.2	51.8	86.1	93	55.6	58.9			52.6	106.4	93.9	101.5	86	99.5	81	94.5	81.1	213.5	247.7	176.2	142.5	87.6	77.5						90.5	74.6	58.8	115	108.2	79.4	94	175.2	125.2	102.5	104.3	64.5	169.8	59.2	98.3	206.2	92.2	68.2
A0A287W6F7												120	136.2	92.8				107	89.9	111.3	104	118.1	81.1				1140.7	995.9	229.2	246.2	160	162.3	128.4	172.6				119.8	79	184.9				186.7	169.4	197.5	129.6	144.2	104.5
A0A287FC05	90	113.6	121.7	259.2	237.8	141.1	111.6	181	188.2	254.8	230.2				215.7	216.7	243.3	74.9	89	112.5	20.7	73.7	30.4	78.1	71.7	101.7	62.7	106.4				80.3	70.7	163.5	88.9	57.8	188.9	336.5	214.2	366.6	359.8	56.2	47.7	104.3	158.5	143.7
F2DMV7	85.1	200.8	157.1	114.8	194.6			150.4	195.2	109.6	81.9	169.3	156.4	149.8	144.6	113.3	130.7	169.3	122.2	99.5	150.8	92.2	149.6	59.6	114.3	97.4	176.2	209	150.4	166.3	118.5	94.2	100	185.7	142.8	177.5	93.5	383.2	339.6	444.5	230.2	133.7	151.2				51.1	112.2	82.7
A0A287UKZ4	61.7	201.7	75.4	70.1	181.7	116.2	121.7	111.2	119.4	111	114.3	101.4	132	96.2	207.9	161.9	121.9	85.1	174.4	85	53.4	63.1	70.4	66.7	65.2	53.5	81.4	168.8	73.6	71.6	50.4	46	62.2	142.4	59.5	50.6	55.1	102.5	118.4	43.3	122.3	142.2	101.1	87.3	103.7	74.7	69	53.9	120.6
A0A287JD54	88.3	68.4	82.4	61.1	64.8							85	71.6	83.9	157.8	59.7	124.9	97.4	108.4	79.8	287.7	74.5	458.6						159.8	156.4	162.1	182.8	64.1	197.5				108.9	55.7	81.8	105.8	98.6	204.8	78.6	83.8	59.9	35.6	58.4	53.9
F2CU01	124.7	46.8	65.8	92.3	50.8	91.4	148.4	119.6	139.5	176.5	129.7	54.7	106.1	68	41.9	51.5	48.4	105.1	221.5	74.9	17.6	19	23.7	34.3	40.3	33.2	96.2	156.9	83.2	76.3	368.9	130.8	135.2	79.6	95.6	65.2	74.5	32.7	93.5	118.6	135.7	165.3	159.8	150.5	100.6	105.9	137.1	102.6	173.5
M0YVZ4	165.7	80	171.3	80.3	73.8	76.7	65.8					63.9	90	90	152.7	121	126.2	153	109.1	67	358.6	64.6	245.5	175.1	245.1	216	87.5	121.3							140.5	185.4	74.1	142	212.4	157.7				156.1	102.8	97.1	176.1	134.3	116.9
F2D791								112.9	164.7	117.1	89	120.2	91.7	118.9	62.5	58.3	56.4	69.3	89	81.7	159.8	116.2	180.9	79.1	85.7	92.6	140.6	126.7	80.3	101.4	69	80.1	205.6	147.9	106	104.4	110.2	57.2	44.4	24.6	76.7	94.2	73.8	187	186.5	159.9	144.8	68.7	66.3
A0A287PQQ9	83.6	177.5	213	125.5	126.4	72.2	73	63.6	220.4	84.1	179.6	103	56.9	54.9	74.7	63.5	53.4	241.2	164.8	84.1	164.7	138.9	113.1	56.8	116.9	127.3	119.5	167.4	234.9	141.1	88.9	123.2	79.8	212.8	60.5	214.1	84.2	114.4	76.2	107.6	110.6	114	131.1	36.8	107.6	84.8	179.4	139.9	151.7
F2D6T3																								206.9	241.1	270.6												317.7	356.4	357.3
E9LEY2	75.3	79.9	94.8	98.4	97.1	144.4	112.6	64.5	55.1			114.5	117.9	69.2	123.1	100.1	111.7				212.7	155.6	277.4	188.4	126.6	183.1	77.9	62.7	111.2	80.3	133.9	130.9	109	74.4	94.6	149.7	116.2	108.3	99.7	91.1				264.2	255.6	196.3	153.5	96	83.4
A0A287G3R9																		162	147.3	92.3	511.1	684.5	670.5	397.3	465.8	271.8	191.3	192.6				152.9	170.2	196.1				221	223.6	303.4							233.8	219.8	124
A0A287JE64	34.5	4.4	21.7					36.1	5.1						7.3	7.6	6.2												15.5	8.7	22.8							27.9	26.9	31.3							35	48.1	44
M0Z1C9	182.4	159.2	163	192.8	178.7	283.6	269.1	83.9	76			192.4	128	171.8							518.7	244	291.2						104.9	164.3	204.2				174.8	129.1	144.1	104.8	83.7	90.5	189.1	133	128.4				214.4	236.3	219.3
A0A287RZU5	173	100.6	197.6			154	58								116.3	130.7	140	81	111.5	102.1	166.4	128.3	76.5	103.2	111.8	157.2			271.7	327.8	266.4	251.8	154.4	61.7	106.1	115.6	50.7	89.9	61.9	78.6	109.9	88.3	50	255.4	181.4	156.4	241.9	114.2	170.7
F2DP90	133.3	124.1	94.7			87.9	93.1					148.4	152	179.5	159.6	142.9	182	133.9	139.3	117.4							133.7	150.5				138.5	176.4	149.3				139.4	201.8	95.9	80.8	97.7	67.2	121.6	126.4	83.7	161.1	221.2	151.4
A0A287PBV3																																															394.1	250.7	327.9
A0A287IFJ7	138.6	131.4	104.2	106.9	144.9	79.1	95			109.3	106.4	43.3	116.8	135.2	93.5	136.5	115.2	97.1	61.4	55.4	71.2	100.4	81.1	143.5	88.8	137.3	209	162.6	81.4	110.6	112.3	68.4	63.2	80.8	118.1	92.6	95.4	49.2	91.8	71.8	127.3	141.8	145.6	75.2	79.4	77.1	66.2	52.1	66.5
A0A287K1N9
A0A287TDC5																					317.3	157.9	424.7															350.6	374.7	347.6				405.9	373.6	321.9	648.4	454.6	444.2
A0A287K6S5	277.2	246.9	243.1												265.5	234	259.4				448.7	494.4	761.6	238.1	266.4	233.3									386.1	278.1	304							239.9	241.3	247.6	356	380.9	380
F2EIA2
M0XM51	116.7	70	149.1	59.4	49.4	89.8	67.3	52.2	53.5	45.5	37.4	59	41.3	73.7	74.1	64.5	65.4	85.9	87.9	100.3	224.8	66	217.2	246.9	167.2	98.1	107.6	79.7	168.4	167.4	134	150.1	87.2	32.5	89.5	65.3	161.9	104.9	112.8	184.9	77.3	94.5	93.4	269.4	180.3	175.1	255.3	185.5	52.2
F2CS06				90.2	83.9	173.8	141.6								129.8	93.2	152.2				207.4	68.7	226.3	267.8	232	216.8									218	186.4	251.2							165.3	165.5	172.3	324.3	394.8	233.5
A0A287E6B0	211.4	108.8	94.2					153.7	149			81.6	114	88.7							69	99.3	71.6				128.3	87.7	156.6	184.2	153.5	75.1	96.3	164				185.8	192.7	231.7	155.2	154.5	174.7				68	83.1	109.3
A0A287RYT1
A0A287WBQ7																																						497.6	278.8	408.7
F2DA54	123.4	103	116.7	111	95.7	82	33.7	113.3	86.2	141.6	109.6	119.3	89	77.7	147.8	77.2	108.8	57.9	164.1	116.1	45.6	95.5	173.7	34.9	64	34.6			71.5	65.5	145.2	123.1	178.4	116.1	104.9	123	164	115.9	77.7	111.3	71.9	131.5	190.2	126	194.4	110.7	69.7	75.8	135.6
F2DXR4
F2D7T7	196	174.6	201.7	227.8	192.8					150.4	169	174	187.4	207	169.7	100.5	136.9				105.2	97.6	134.2	199.8	222.6	176.9			217.1	156.1	212	172.1	127.9	131.7							220.7	99.4	142.1				126.6	152.8	96.9
A0A287GTT8	47.4	61.3	63.8	64.7	75.8	83.7	514	85.8	52.2	77.1	95.3	67.4	31.4	150.7	67.9	92.2	53.3	75.6	68	51.5	119.3	74.7	76.7	114.9	77.9	55.3	61	63.3	61.4	75.1	48.6	45.8	54.4	100.1	59.9	66.4	62.5	141.6	164.6	37.1	84.4	160.1	49	61.7	55.1	58.9	80.6	101.8	146.2
A0A287M426	93.9	238.7	291.1	115.8	114.7	128.4	88			85.1	79.9				87	53.5	28.9	60.5	53.1	109.6	186.1	84.5	59.5	159.2	134.2	107.1	73.1	75.1	117.6	158.6	164.4	159.2	193.6	168.2	98.9	72.9	209.3	120	89.4	117.8	156.5	181.5	197.9	309.9	150.8	87.9	269.6	120.4	61.9
A0A287VX29	103.9	73.3	127.4	90.9	99.1	132.3	213.3			50.4	76.5	65.3	59.9	56.3	57.5	67.2	71.7	113.8	61.6	115.9	385.9	95.6	300	352.9	170.3	173			306.4	78.4	99.6	100.1	43.9	110.2	106.7	166.8	141.4	76	63.2	112.8	62.7	74	80.4	198.4	199.6	150.6	148.4	100.5	124.5
A0A287P4J4	89	100.9	110	248	258.3	216.5	309.2	155	192.1	251.3	294.3	249.8	136.1	279.4	202.3	266.4	269.6	89.1	54.6	114.6	97.7	154.1	160.3	75.6	246.8	59.6	298.8	266.8	168.8	136	180.2				250.2	114.7	137.6	50	31.4	41.4	320.3	235.8	292.8				55.2	56.3	73.8
A0A287HCQ2															209.5	175.9	142							302	352.5	269.3									230.6	263.1	233.9										566.1	499.2	417.8
A0A287X615																					545.1	517.9	757.9
A0A287WPQ1				67.5	87.2	127.7	126.8	53.3	49.4	128.2	120.1	75.6	123.8	153.1	124.2	180.1	98.4	120.8	101.8	104.9	298.2	64.8	200.2	250.6	123.5	120.6	40.8	90.7	75.8	83.5	82.9	87.8	61.8	46.1	35.8	49.9	134.1	84.1	79.4	83.5	73	92.2	30.9	213.2	123.7	112.5	317.7	262.3	126
A0A287K7P3	430.8	318.8	407.4	448.3	359.4	349.1	355.5								356.1	310.4	340										418.3	373.4
A0A287JE54
A0A287M419	194.5	261.2	283.1	198.6	372.2	213.1	212.6			156.4	144.3	141.4	151.1	149.5				155.6	181.5	158.4	166.5	148.7	146.3				195	170.6										224.4	214	182.3	225.8	137.3	390.4
A0A287PQS8	302.2	266.7	221.5	197.7	211.5													287.8	321.6	295.9	440.7	461.9	467.4						235.1	170.5	146	135.7	282.3	246.3	338.5	281.7	264.3
A0A287G6V6	56.5	139.8	100.8	114.9	134.3	59.8	122.1	112	118.2	106.4	102.9	93.4	148.2	128.9	140.9	91.1	139.5	128.5	137.7	168.6	66.6	143.9	196	40.9	88.8	69.5	87.1	113.4	77.7	119.8	37.8	65.4	118.8	119.6	112.6	131.2	130.6	165.7	70.5	80.2	97.9	84.5	184.7	52.6	97.4	74.9	39	34	46.3
A0A287F6R7	172.9	70.4	155.8	82.6	66.3			139.8	110.3			131.2	152.3	117.9	82.3	79.6	57.7	69.1	82.9	74.8	288.3	185.9	189.4	130.3	65.4	166.5	61.5	78.9	196.2	79	156.5	225.3	190.6	250.2	155.8	145.2	128.9	125.8	60.3	168.1	132	37.1	90.1				157.2	120.6	116.5
F2DGK4				159.5	226.6	172.3	199.6	169.4	205.1	237	208.9							187.1	219.4	231.4	102.1	78.8	150.7						174.3	219.1	144.5							163.1	230.8	315.2
M0Y6T6															237.9	189.4	212.9										225.9	264.3													403.4	470.1	520.6
A0A287LID5	117.9	143.8	91.2	79.7	86.7	65.9	80.4	97.8	130.6	85.6	63.8	152.9	141.9	167.5	86.2	81.9	74.4	150.3	257.7	204.1	144	69.5	130.3	79.6	132.6	102.5	100.4	168	39.1	56.8	55.4	53.8	49	73.1				541.1	77.8	71.7	108.9	63.8	154.7	61.5	173.5	78.8
A0A287TUD5	347.2	283.6	357.7																		573.3	676.1	495.7																								555.2	253.7	287.2
A0A287HLF1												288.8	291.8	92.3	136.7	83.4	143.6	180.1	184.1	265.3												157.1	125.6	125.1				67	92.1	94.8	133.4	122.1	111.4				93	107.9	91.6
F2EKQ3	199.7	261.7	252.4																		348	553.6	237.8	221.8	206.4	141.9												70.8	105.2	145				229.6	205.3	189	328.9	361.1	391.2
F2CSN3	146.5	148.1	139.2			304.6	156.6											89.3	92.7	124.2	127.2	55.1	186.1	146.7	130.8	123.6			684.5	515.1	702				109.1	73.3	141.9				146.5	185.5	155.8	390	476.3	563.3
F2DCF9	99.1	114.6	120.5	120.1	116.8			188.7	156.5	187.1	148	278.7	211.3	181.8	89.7	127.9	141				145.3	133.6	122.6				78.2	190.3	122.1	179	76.1	87.5	151.4	190.2							153.8	157	161.8	113.9	87.8	90.5	139.7	138.9	181.9
A0A287I5J7				244.2	247.1			315.4	285.5	152.7	232.9										408.5	270.5	394.2				183.1	203.8										245.8	286.3	291.1
A0A287V984	292	358.4	327.8	120.5	116.6																386.4	364.3	333.6	283.1	188.1	167.8			179.1	155.7	130.5				201.1	167.6	225.1							169.5	162	143.4	203.3	214	94.8
F2E6L9
A0A287MCN0
A0A287R9G7	138	147.6	129.9			138.1	140.8											146.2	107.5	166.4	463.6	331.8	618.3	477.4	373.2	318.5			142.2	250.2	142.1	202.1	244.9	201.1	150.4	120.9	97.5				197.6	154.7	122	223.4	175.9	140.8	432	180.7	404.1
A0A287XVR8	288.9	306.2	257.1																		204.2	222.9	264.5	293.9	312.3	306.6	483	241.8																			193.4	476.3	204.7
A0A287JZA4	68.5	66.3	60.7	58.5	73.9	77	85.8	56.5	69.4	67.5	81.9	67	59.3	98.6	124.7	100.5	80.7	71.4	60	70.4	113.3	56.5	145.3	154.5	83	142.5	96.3	91.6	99.3	95.2	60.6	79	78.1	68	78.9	102.7	76.9	173.1	110.8	68.9	161.4	84.7	51.5	48.8	63.1	45.4	103	103	102.9
A0A287FJQ9																					1721.6	1705.9	1381.7																								688.6	748.9	635.5
F2DM81	62	48	53.6					72.9	60.5			72.4	78.7	104.2	119.4	181.5	115.1	122.3	141.8	95	46.8	37	66.3	81.4	86.4	87.1	79	91.8	106	66	59.1				85	91.2	86.6	110.6	64.4	78.3	69.9	79.4	54.7
A0A287LJL2	249.9	216.3	247.8	367.6	355.1					235.7	305.8				274.8	250.5	172.7	300.2	359	340.1				285.6	299.9	242.3															272.5	174.4	253.5
A0A287M563	122.8	156.7	102.5	35.5	166.9	56.7	57	129.7	122.9	200.9	127.7	108.4	155.8	48.2	222.2	189	241.9	157.1	141.4	162.7	183.9	199.5	128.3	76.3	160.7	122.9	162.3	159.7	76.7	74.4	90.9				135.6	80.3	105.7	179.8	64.4	139.4	172	163.4	155.1				50.2	73.1	63.9
F2CU40	161.1	124.2	137.1	88.2	106.2	130.8	74.8	46.5	43.9	85.5	87.3	88.5	109.4	75.2	106.6	77.5	77.9	92.6	127.7	135.4	33.3	92.9	130.8	56.2	65.6	58.3			69.4	80.4	107.5	121.9	144.1	147.2	99.9	56	49.7	66.4	160.3	74.3	152.2	160.3	99.8	55.3	126.4	102.6	95.1	18.4	129.2
F2D0E8	82.3	90.3	65.4	43.2	75			78.4	79	45.3	44.3	74.2	67.2	60.2	56.2	72.9	63.5	58.7	72.6	49	33.5	30.5	446	57.5	55.6	49.4	41.6	104.2	26.8	25.5	34.7				50.4	49.3	39.5	1096.7	967.7	991.8	27.9	27.4	25.5				56	45.4	43.9
A0A287NQ27
F2EBG8
F2D4X1	50	90	104	136.5	94	101.6	67	202.1	97.3	73.2	127.4	129.4	132.5	62.9	92.4	56.5	84.6	95.6	167	129.2	72.6	151.8	143	102.5	119.6	131.3	173.3	109.8	48.3	219.9	114.5	110.8	209	109.6	68.9	127.7	116.3	111.5	129.1	138.7	92.1	109.3	107.4	101	116.5	126.3	85.8	127.9	71.9
F2CT66																								689.3	677.4	663.3
A0A287KBD3	151.2	116.6	93.7	150.7	145.4			139.9	108			190.6	250.9	166.6				115.4	127.7	139.2	147.3	174.1	102.6				231.8	212.2				223	127.1	185.8				163.5	220.3	179.8	207.8	169	123.5	127.1	120.4	123.8	122.1	162.7	135.6
A0A287PCS7
A0A287K8Y8				265.8	237.4																											259.4	284.4	299							145.3	219.2	190.4
A0A287NL38	201.4	249.9	175.9			138.5	165.9			154.6	157.4	172.9	180.9	165.5	188.8	188.9	147.9				202.8	192.4	111.7	180.5	143.6	125.2			133.7	100.7	167.6	153.2	148.4	106.4							140.8	90.7	142.2	114.2	131.6	149	205.7	170.3	75.6
F2DB27	74.7	92.6	49.8	172.3	71.6	185.1	241.9	73.6	79.4	198.4	188.2	113.2	88	96.8	114.5	134.5	120.7	62.3	53.5	60.1	81.8	137.4	126	65.6	52.5	68	81	86.9	179.7	181.7	131.9	72.6	151.7	75.1	192.8	190.3	213.7	67.4	113.2	99.7	102.1	78.4	104.4	198.7	245	140.2	126	174.4	179.2
F2DBY5
A0A287GSR0								139.6	163.1			205.9	208.5	232.1													131.6	108.7				108.4	117.2	134				196	216	207.3	135.1	116.3	116.4				174	114.9	186.7
F2E1N0																					422.3	302	388.5	302.4	303.2	277.2																		697.6	564	304	570.2	406.2	406.3
A0A287H0D7	135.8	254.2	107	162.7	176.7			467.7	474.6	136.2	138.7	78.5	112.6	77.1				278.6	377.2	175.5				446.6	429.3	337.7	582.7	157.7	473.7	559.3	365.1	111.9	99	99.1				96.3	133.2	114.9	255.3	249.3	289.6	87.2	129.1	115.1	353.7	361.6	293.6
M0WIE0	228	270.9	245.8			288.7	363.4	235.6	175.2																																415.6	412.9	210.8
F2CSK8
A0A287T1T5
S4Z279	162.3	302.5	317.4																		545.6	756.9	566.1	260.3	230.8	204.8																					507.4	307.9	539.8
A0A287I8I7
F2E2A1
A0A287PTD2	210.7	227	185.5			174.1	204.5	173.1	190.5			269	195.8	227.9	288.3	271.4	161.3	162	139.8	152												278.5	259.8	286.9							115.1	155.6	118.2				194	106.6	168
A0A287UJS8								132.1	129	239.1	246.8				563.2	405.6	713.1	182.5	156.9	151.1	371.3	252.1	572.2	504.7	454.1	440	183	146.4	181.1	157.4	194							201.2	159.8	205.6				255.7	201.1	201.6
A0A287X535						195	144.6	190.4	153.1	238.4	154.2	153.5	217.5	146	128.4	97.5	154.8	85.1	77.8	74.8	117.4	102.8	109.2	135	186.6	192.7	155.9	199.4				90.2	130.8	125.9	209.4	83.4	125.3							144.5	130.7	129.7
A0A287RXR1	211.3	186.4	179.7	138.5	114.3			214.2	245.9												313.8	185.4	287.7	136.8	103.5	120.1	197.8	227.2							156.6	185.8	202.8				362.6	339.4	336.8
A0A287TJI3	319.4	352.6	431.9	184.6	230.3										367.1	453.1	448.9	327.5	288.4	423.8	129.7	149.2	165.9				235.3	312.6													142	129.9	122.4
F2CVJ6	72.4	99.2	82.7					122	117.8						95.1	160.8	136.1	82.6	56	77.9	407.8	499.9	482.2				74.4	60.5	82.3	60.2	52.2	97.9	59.1	83.3	94.1	87.5	95.2	168.9	214.1	94.1				119	143.6	95.7	340.1	292.3	140.8
A0A287EI86	73.8	88.5	84.1			146.3	146.3					106	128.6	117.6				77.3	118.1	99.3									161	170.7	143.8	115	127.5	85.4				501.5	381.8	345.8	141.1	185.1	214.6	185.6	162.5	262.5	320.7	116.8	323.1
F2DV69																					317.5	270.9	342.8																					839.5	808.2	692.4	380.7	332	298.1
A0A287EXP7	100.9	68.8	97.3									109.5	131.1	99.3	67	124.8	97.8	71.2	94.9	105.6				88.8	74.4	100.9	77.1	127.3	50.2	77.9	57.6	63.9	81	112.1				89.5	197.2	91.5	173.1	123.2	139.2	75.1	72.3	70	87	150.2	123
A0A287SM54				84	117.6													95.1	234.1	141.8				535.2	681.9	587.4	183.9	194.3	153.8	192.6	148.6				193.8	231.7	276.6	69.9	66.9	94.1	167.4	142	183.8				166.1	196.2	122.1
A0A287MF41
A0A287R039	21.3	182.5	93.5	83.5	165.1	65.4	223.3	43.5	242.7	220.5	308.8	53.5	230.4	188.2	135.4	194.3	148.8	149.2	138.9	116.4	121	82.4	238.8	141.4	222.5	110.3	76	207.5	175.3	16.8	36	36.8	71.2	62	207.5	83.1	69.8	106.8	36.6	53.1	24.9	53.4	221.7	65.9	85.2	79.3	43.4	69	57.3
A0A287S986	244.8	150.6	119.5									171.7	160.6	264.6	161.3	138.2	190.9				104.2	70.6	93.5	150.5	160.4	159												180.2	201.5	172.4	295.2	201.5	253.4	123.8	126.9	121.1	194.1	110	150.8
F2DFG2	161.4	162.1	199.1	107.9	114.3					150	156.3	219.9	205.8	172.4	125.2	153.5	148.6	125.4	284.4	77.3	79.3	85.6	82.8	99.1	120.8	127	93.5	188.5				211	166.9	168.1	132.5	85.1	100.9	143.6	139.5	132	119.4	135.8	130.2	131.4	160	151.9	88.4	76	119.5
A0A287MBK1	834.1	747.2	709.5												730.7	576.8	565.5										527.6	606.1
A0A287RP18	178.9	145.5	217.3	180.7	207.1	234.3	304					220.5	197.2	190.3				249.1	237.4	234.7	220.7	295.9	378.1									295.4	381.7	213.8	243.7	192.9	279.6				175.1	110.6	294.6				145.1	151.7	147.7
F2EGE2	134.4	133.9	122	141.1	109.4	143.6	119.5	159.8	165.7	76.6	103.2				93.3	83.8	41.1	102.5	72.3	90.2	207.5	137	87.7	123.5	103	147.8	134.7	156.2	66.6	108.3	79.9				101.5	134.6	89.4	149.7	141.7	114.5	114.5	88	90.1	102.8	127.1	118.5	71.9	51.4	98.9
F2DI15				203.9	216.2	161.6	197.6														449.2	747.9	554.3	468.1	432.1	516.8			118.7	107.1	157				170.4	210	182.9							368	482.5	330.4	253.1	268	348.1
A0A287LLU1
A0A287R9E9	102.4	70.8	95.5			122.6	115.5	211	230.5						125.9	136.2	172.6	124.5	75.5	102.8	208.2	186.3	183.4						206.1	210.7	208.8							353	490.9	294.2
A0A287Q3I3	109.7	130.2	167.9					118.3	146.7			96.5	99.6	125.7	125.4	139.2	196.7	103	118.4	109	113.1	68.4	63.7	120.1	76.3	88.6	183.1	151.6							93.4	103.6	120.9	238.6	201.5	115.2							123.3	136.6	148.9
F2DLQ1	125.5	68.8	219	147.4	83.9	163.4	171.8	67.3	48.4	52.6	76.7	40	78.7	108.8	53.1	111.5	23.3	134.4	33.3	88.7	537	120.7	43	347	88.1	252.2	122.9	62.3	226	66.1	183	205.3	25.5	68.3	138.4	172.2	120.6	15.4	61.5	147.5	154.3	93.5	22.2	236.9	35.2	190.1	352.4	167.2	56.7
F2EAU2
M0YJS4	182	214.3	226.4	251.5	207			222.9	208.7	177.1	199.4				359.4	186.4	288.3				219.1	121.6	171.5				122	136.2							152.1	186.3	152.1				181.9	198.4	178.2	140.3	135.4	138.4
A0A287WN95	108.8	64.2	38	30.1	27.8	46.3	40.9	160.7	50.4			172.5	54.2	101.5				72.8	106.6	73.5	106.6	97.3	91	10.3	14.3	13.1	42	32.5	94.8	100.6	92	65.3	93.5	83.7	158.2	121	153.4	42.3	86.4	150.9	118.2	149.2	127.8	146.4	292.2	101.9	129.5	148.2	85
F2EAF6								216.6	193.5						211.8	190.4	230.9				208.5	130.9	148.3						183	209.2	247.5													976.8	530.7	498.3	924.6	925.6	863.6
M0YJU4	198.4	235.2	164.1	236.6	286.5					310.2	299.8	183.1	203.6	259.9													345.9	333.5													419.6	242	317.8				194.2	190.1	216.5
F2CYI2												139.7	143.4	100.4							59.7	110.8	121.7				230.2	233.8	240.8	207.1	176.9	169.6	220	270.7				130.5	134.6	157				183.8	209.5	187.7	126.3	116.5	105.1
F2CV17
F2DTJ3	171.3	163	84.1	160.1	186.9			126.5	157.4	221.2	166.8	45.2	131.9	67.9	122.1	69.4	124.4	162.5	212.2	194.2	215.3	152	216.9	58.5	81.6	77.9						151.3	130.1	151.7				168.2	144.7	105.4	211.8	264.5	182.6				127.1	156.3	151
A0A287RRS2
F2DE08
F2DVV7																																															525.7	610.4	677.5
M0XCY5	275.4	310.2	260.7					237	209.9	244.3	181.6																224.1	172.7				290.1	202.2	240.3													249.8	124.2	206.6
A0A287TAL1	33.1	77.7	32.4	30	74.4	35.2	51.6	29.9	80.1	102.9	68.4	37.1	61.3	97.5	391.2	107.5	96.6	83.6	37.3	41.7	101.9	328.9	292.2	141.9	79	69.8	43.6	99.8	104.6	36	23.8	26.3	33.5	26.4	92.4	161.1	38.4	238.6	28.2	28.8	73.6	20.8	100.9	15.5	44.6	20.2	48.2	81.5	33.4
A0A287FAP7	237.8	199.1	292.9			289.6	341.5								461.6	337	138.3															235.7	196.5	236.5				277.1	326.1	253.1							164.4	246.3	234.8
M0WEH7
F2D039	235.5	231.5	175.5	202.8	174.1			267.1	258.4	186.5	142.7				244.8	212.2	217.5	206.2	169.4	172.1				203.1	166.7	172.8									178.4	126.2	137.3				191.2	96.6	329	196	166.4	205.7
A0A287E422																		243.8	264.1	273.5	529.7	432.1	236.5	317.9	319.9	278.9												250	199.2	233.5	241	226.9	244.8	440.9	479	469.7	619.5	363.1	311.1
M0VN35	399.8	200.6	393.6	286.8	258.8																218.9	106	169.5	119	191.2	163.8			233.9	242.4	257.6	232.7	262	81.5	192.7	399.7	323.4	106.3	148	129.4	210.5	218.4	184.7	231.8	215.6	272	290	315.5	256.8
A0A287I1Z8	279.2	365.1	326.1	423.4	429.9			293.4	256.7			290.9	282.3	285.6	356.4	316.9	280.9	185.6	261.5	195.9	343.5	242.2	223.7				391.9	258.5							301.8	274.9	247.1	318.8	225.4	267
A0A287HAK5	241.2	316.2	246.2					119.7	141.3									125.4	111.3	73.7	85.9	86.1	92.7	96.5	94	111.9						175.6	120.4	110.7				132.7	186.4	164.4	89.3	93.1	111.1	108.1	124.6	181.3	120.8	80.5	107.3
F2CRK6	355	363.2	450.4																																												480.3	478.8	554
A0A287KAY6	147.2	134.1	78.4					200.1	114.5	156.9	139.9							184.6	274.1	168.5	183	162.7	149.3	130.7	133.9	102.1						111.1	219.7	268.3	149.2	189.5	148.7	299.4	315.6	271.6	168.1	121.9	188.8				139.2	108.9	127.8
A0A287LSG1	134.6	186.8	133.6	92	110.1							65.8	103.3	87.5				91.9	103.9	105.8	175.2	69.3	98.2	160.7	146.2	90.4			76.9	110.9	98.8	100.2	125	81.2	102.9	161.9	99.4	69.4	55.1	130.5	74.4	106.6	110.4	170.9	146.8	112	183.6	203.2	153.6
A0A287GKL8
F2E4E2				369.5	359.4													384.4	259.2	291.5	604.6	372.4	735.3												202.6	294	476.4	226.3	223	242.8	172.7	219.1	272.2	317.2	312.7	346.1
F2E6V2	554.7	844.9	597.7									331.2	257.7	373.5	572.4	432.2	536.1															594.7	399.2	486.4
A0A287SLP6	220.2	215.7	141.3	138.4	197.3			529.4	275						212.1	269.6	177.9	225.3	272	161.3							408.7	523.3				139.9	101.5	163.8													650.1	348.7	241.6
C7BWK4				382.5	372.1										563	576.1	791.1
A0A287PA87	88.1	73	91.6					69.5	70.5									150.3	197.6	183.4	96.3	79.2	91.2						113.9	170.7	138.9				80.2	89.4	89.7				94.1	108.7	131	161.3	235	185.8	101.3	100.6	96.8
A0A287MWN8	132.1	86.8	195.9												85	104.8	63.1	168.1	83.9	71	334.3	250.6	273.3	234	276.7	163.3			51.9	34.1	132.7	173.2	218	208	58	102.6	116	179.2	86.5	116.7	181.7	163	172.8	108.3	115.5	108.6	194.3	175	185.4
F2DD06	80.6	124.9	81.9	329.9	273.6	244.5	147.3	177.1	114.4	138.1	89.7	467.4	474	597.2	137.5	88.5	136	88.5	174.5	199.5	179.6	315.2	350.9	179.7	117.6	83.2	159.7	121.6	91.8	142.4	180.5	261.5	335.9	488	109.1	65.8	150.5	118.6	68.6	161.9	162.1	164.2	222.1	121.5	107.3	105
A0A287F7H0	218.6	190	243.1	138.8	113.8							198	204.7	200.5	118.5	90.7	119				157.7	532.4	159.7	138.6	161.4	145.5						242.8	148.5	522.8	125	144.5	135.3										115.6	290.4	251.2
F2DTN3
A0A287MX61	21	341.2	45.2	160	202.9			266	305.3	668.9	276.4	39.8	104.3	193.8	840.7	54.9	287.7	79.7	82.9	57.1							26.7	26.2							257.5	355.1	353.9				100.9	60.6	161.5				56.1	55	70.4
A1EA33	116	210.1	245.5	141.3	143.4							145.7	166.3	101.9	48.9	56.5	59.8				263.5	276.8	202.9	180.5	204.8	126.9	105	120.7	156.9	121.4	216.3	165	165.8	225	93.8	229.9	250.1	155.3	85.8	143	99	81.8	56.2	123.7	91.7	99	179.1	175.2	112.1
F2CQL1						236	211.4											96.2	122.5	125.5	355.3	555	544.4						249.5	250.7	290.4										253.2	273.1	289.5	168.6	151.6	117.7	250.9	250.4	148.1
F2D604	373.9	264.7	296.1			337.7	261.5			358.1	354.9																					558.7	410.6	428.1	212	366.8	584										164.1	194.4	150.8
A0A287NRF0	181.6	313.5	225.1																		106.8	118	121.5						186.6	203.3	262.2	297.6	271.2	217.9				710.2	552.4	485.1
F2DMU9																																						95.4	111.3	118.8
A0A287P4F0						599.6	600.2											191.7	202	206.1	587.2	279.2	892.1	297.5	185.7	395.6			200.8	192.8	182							198.3	210.9	226				186.7	161.3	150.5
A0A287M736	201.4	206.7	174.1	225.9	173.4			272	242.6						180.3	180.2	238.7	170	202.8	146.9												155.8	186	124.4							154	167.4	169.4				453.3	272.1	402.5
F2DH88
A0A287IRL3	234.1	205.3	225																										191.8	244.5	238.7							205.5	141.4	196.4	303.3	206.5	230.8
A0A287R6Y3	48.1	87.1	113.1	167.3	109.9	73.5	114.3	105.4	162.4	122.5	149.6	72.6	175.6	162.3	83.5	147.4	111.6	65	60.8	72.5	109	111.4	96	154.6	124.1	113.9	89.5	165.1	91.3	73.5	51.3	90	90.8	150.9	116.7	85.7	88.3	79	69.7	53.4	113	35.3	66.4	75.6	95.5	188.2	175.5	135.5	145.2
F2CQU9	48.2	162.6	86.8	101.6	141.1	89.7	116.7	86.5	106.7	138.4	119	65.3	121.9	95.6	107.9	83.9	119	87.9	202.9	164.1	76.7	78.8	131.9	137.1	111.5	76	65.8	139.6	72.5	97.6	41.8	114.2	145.7	104.8	95.6	65.5	154.7	131.8	54.1	46	135.4	164.7	144.2	74.1	118.4	75.2	59.7	96.9	122.7
F2D2H6	81.9	81.1	58.5	93.2	64.7	69.7	113.7	130.1	117.1	160.6	101.1	82.9	68.9	81	141.8	130.7	91	53.1	59.4	54.4	108.8	46.4	43.8	69.1	95.8	109.9	58.9	76.6	69.2	56.7	42.4	67.7	63.3	77.8	111.1	53.1	79.3				95.8	109	64.2	75.3	127.5	201.8	155.1	70.7	212.9
A0A287GP25										119.5	295										227.7	230.9	88.1	231.7	170.6	194.8						214.7	180.2	212.3	164.4	141.9	136.8	111.4	145.8	166.8
A0A287V5C3	225.2	221.3	158.8												82.6	133.9	165.2	164.1	118.2	175.5	410.7	241.8	277.5	281.4	346.5	269.9			135.8	192.7	182.4							217.3	189.8	193.7				237.3	176.9	196	308.9	228.3	308.3
F2D0C8	99.5	171.3	193.1	145	194.5	120.5	101.5	144.4	64.3	94	76.7	150.7	117.6	84.2	107	74.5	105.3	87.1	154.8	167.7	87.6	115.7	138.9	83.6	117	69.9	102.1	84.7	91.8	189.4	149.6	108.7	165.1	126.2	45.3	61.1	97.2	95.8	101.8	98.8	57	125.5	143.5	159.2	109.2	54.3	102	66.3	107.4
A0A287T3N5	78.8	80.1	57			54.3	52.3	55.6	60.7	70	84.1	83.5	48.6	185.9	99.8	71.7	93.5	74.1	82.6	69.2	50.4	58.3	74.8									97.2	79.5	90.2	66.6	48.8	58.4	89	83.4	124.2				61.2	161.3	129.9	90.5	73.2	69.8
A0A287DTY5								113.2	102.9						178.5	41	464.4	198.9	171.1	190.7	271.2	84.4	319.4																		327.2	452.7	324.6
F2CRN1	215.6	167	182.7	128.6	144	97.9	153.5	126.9	126.6	112.6	82.2	112.6	95	116.5	124	195.2	119.2	130.2	105.5	73.3	106.7	98.3	131.8	172.8	155.2	147.6			107.2	72.8	130.4	143.3	170.9	141.9							134.1	230.4	104.9	103	111.8	136.7	114.7	171.2	210.5
A0A287SJT7
A0A287L2F7				70.1	78.7	151.2	124.8	139.8	121.7	108.5	96.8	243.9	55.2	145.3	164.6	76	153.3				79.4	86.6	138.4	86.6	99.2	102.7	56.8	33.1	108.7	97.8	62.6	65.6	45.7	65.5	81.2	148.1	113.3	155.1	139.8	229.7	59.9	68.3	66.1	82.5	55.7	58.4
F2DCY0																					688.9	316.3	578.6	578.3	578.2	431.7																					447.5	447.1	437.7
F2E1V5
F2DN53				413.8	367.2			269.6	290.2	141.5	189							173.9	167.2	156	189.5	228.2	225.8	139.4	184.5	140.3	296.6	267.7							153.1	162.1	146.2				235.9	102.8	171.6
A0A287DWF2																													552.7	524.1	729.1	1246	1275.6	1251.6				349.5	441.1	627.8				468.8	492.8	480.1	845.2	1073.2	530.4
A0A287R332
A0A287SDG5	169.8	313.3	293.8	126.4	177.3			148.1	190						217	228.5	207.7	233.8	220.3	176.7				629.8	453.5	540.4	313.5	417.6	467.7	349.2	399	147.8	117.3	133.4	262.8	212.5	225.2	146.6	202.9	112.4							191.5	100.9	169.6
A0A287UAX6	117.6	169.9	189	132.3	63.4	91.9	119.3			64.9	58.5				119.4	95.3	85.7	122.5	58.5	114.1	272.4	233	282.4	177.8	164.7	121.8			132.2	163.1	129.2	137.5	159.8	126.9	94.6	130	159.5	189.8	119.7	124.7	113.9	81.9	122.6	148.9	177.2	123.8	152.6	137.5	156.7
F2E3J3
A0A287EEA4
M0UQC4				234.6	263.8			170.8	142.7	127.6	115	279.7	236.1	99.5	74.6	35.5	75.5	87.5	178	75.9	87.2	99.1	104.4									268.9	165.9	246.8	154.7	133.5	122				194.1	92.9	202.2	132.9	173.7	135.4	26.5	51.8	64.2
Q1ENF0	54	94.5	111.7	70.9	76.1	88.9	149.7	90.5	86.6	120.2	63.9	57.3	91.6	133.4	45.1	113.1	84.2	145.3	49.4	61.8	294	67	60	275.3	340.5	258.4	95	105.8	263.7	271.2	148.6	46.4	104.1	80.2	153.2	74.3	89.9	55.1	47.1	65.8	76.4	62	88.6	65.9	178.6	85.5	48.1	114.6	65.2
A0A287WSC6
A0A287JG23															243.8	313.6	161.6				251.6	385.1	533.1	265.9	202.8	170.5												365.2	291.2	282.2	109.2	148.8	131.7
A0A287LD69	198.5	180.6	214.8			171.1	124.3					118.6	93	179.5							119.2	104.5	125.2				319.1	292.2	242.1	225.7	257.3	73.4	59.2	166.9				143.2	128.7	130.3	98.5	108	120.4
A0A287X924	105.8	145.9	87.7	85	98.9	61.5	60.7	80.2	125	112.7	99.5	108.7	97.6	125.1	174.2	142.6	116.6	105.6	89.6	56.6	93	149.5	60.9	77	84.3	117.9	86.9	157.5	77.8	68.7	126.6	58.9	108.4	85.6	90	95.7	69.6	91.8	149.3	78.4	114	140.6	104.8	89.8	89.8	113.4	118.1	77.3	161.8
F2DRT5	74.7	51.6	69.8	27.9	133.3	74.7	93.1	113.2	118.4	129.4	132.2	77.9	128.8	118.2	130.3	92.5	103.3	89.6	151	126.5	42.3	112.6	62.3	83.7	85.4	86	79	114.4	41.8	138.9	66.8	50.6	116	105.1	80.4	72.6	115.5	97.9	132.4	99.5	105.6	198.3	40.4	125.9	124.8	130.4	118.6	67.8	148.1
A0A287VAP3
F2DNZ2						296.1	318.3																									280.3	176.5	346.3				287.3	294.1	369.7
M0XSW7
F2E0X3				766.8	91.9			765.2	126.4	87.1	114.9				102	200.1	54.3				88.6	110.5	104.5				827	108.2										155.7	1018.1	584.5	140.1	115.6	130.7
A0A287W596	112.8	104.1	60.4	136.8	119.4	68.5	97.6	145.3	87.7	142.5	64.3	111.1	85	67	109.8	69.6	153.3	83.8	152.1	111	55.3	52.2	50.7	86.4	69.4	50.2	112.5	114	45.6	160.9	142.4	118.7	141.4	75.9	84.7	107.5	89	88.6	78.3	84.7	99.6	179.2	84.4	93.2	89.7	94	101.9	88.6	153.5
A0A287IKY5								139.3	133	136.6	120.2	283.1	85.8	247.9				100.1	94.3	125.2				176.3	163	178.8			220.5	315.1	235.2	221.3	300.3	125.2							99.8	165.3	187.6	168.2	214.1	127.4	206	142.1	181.6
A0A287SIW3				229.5	253.4	346	747.2					254.4	263.3	251.4	154.4	182.1	209.5												472.3	495	494													499.2	665.2	527.2
A1E9U6	163.3	64.5	197.8	175.8	59.7	188.9	170.3	41.8	71.8	42.2	101.7	137.9	132.8	123.8	68.3	63.3	83.1	99	60.7	65	250.8	90.3	49.1	190.8	69	122.7	67.8	60.8	198.9	261.7	221.2	177.8	56.3	62.7	124.9	204.6	213.5	74.5	71.4	139.3	107	102.5	112.6	197.8	73.3	75	281.2	218.1	43.7
F2DS55	321.3	346	318.2			140.5	170.2			310	185.7	199.5	131.6	144.7	235.8	170.5	178.9	165.9	184.3	166.8									308.4	221.7	199.6	285.9	192.3	280.5
A0A287MTS4	264.1	116.7	314.8	123.7	109.3	122.3	104.9			158.9	201.1	170.1	178.1	180.5	86.8	102.8	78.3				183.4	119.3	173.4									148.2	219.8	266.6	137.5	161.5	148.6	194.6	148.5	154.2	88.2	105.5	122.9	113.4	111.6	81.5
A0A287GFQ2
F2CTT6																					680.4	632.4	460.8	126.7	187.1	182.5																					422	238.2	326.6
A0A287GZB7	116	121.3	113					169.3	159.2						185.5	113.1	165.8							150.6	153.1	168									191.3	216.1	236.6	166.8	139.3	160.6
A0A287UK40	76.9	106.4	87.3			154	156.2														230.3	283	254.3	175.2	145.3	151.9						153.6	160.2	182.2				280.2	217.3	363.3	81.4	83.7	83.2	252.8	157.9	242	271.2	172.7	205.3
F2EH52
F2CSZ9
A0A287FG05
F2EEH9	229.6	175.7	193.9	399.1	249			182.2	178.1	164.9	123.6				230.7	144.1	140.2										175.1	208.1				228.5	310.6	220.7	225.3	177.7	219.9
A0A287HK53	413.2	185.5	399	142.4	123.3																								210.5	265.9	137.5	332	555.3	349.8	384.8	317.3	278.9				326.2	251.8	142.3	184.6	218.1	143.2
F2D1B1																					395.8	357.9	457.2	484.2	392.4	532.6																					364	361.9	461.4
A0A287QPF0
M0WWY8	103.9	110.7	45.8	71.4	102.5			82.7	76.7	104.1	87.1	126.7	148.5	139				70.6	202.5	70.5	65.1	80.3	102.2	119.9	101.5	107.6	71.4	63.4							91.4	94.5	79	161.5	97.3	117.9	168.8	199.5	204.7				130.4	84.7	123.8
Q00327	120.2	49.4	52.3			132.6	147.5	108.4	94	57.9	51.7	97.8	64.9	97.3	46	47.1	43	70	50.3	76.8	121.6	48.8	42.5	118.1	101.1	105.8			77.4	216.8	290.2				108	118.4	95.7	197.3	123.2	173.6	79	133.7	110.9	425.2	254.7	100.2	292.6	191.1	68.3
A0A287P023								393.6	393.1			355.3	292.4	290.9							174.3	226.8	93.6						442	334.9	280.9	275.1	152.6	346.8													94.7	121	161.4
M0X5Q3																					2127.4	2684.2	2054.6																								1816.1	1407.5	1593.6
A0A287PMH1	161.3	115.1	206.7												83	151.3	84.8															115.3	89.4	95.9										153.3	161.6	125.1	196.5	166	193.3
A0A287RHH7																																						210.7	358.3	354.4				604.8	464.6	490.4	389.2	494.5	344
F2E3S9	125	61	159.3	119.2	55.6	257	94.9			65.4	50.4				34.8	39.1	27.9	52.8	55.6	58.6	167	64.9	74.9	308	241.3	142.1	187.9	170.6	102.5	127.5	164.8	116.8	68.3	94.4	85	72.7	130.1	181	216.7	96.6	156.4	135	119.8	358.7	249	185.9	574.5	155.1	265
F2DPS5	87.5	38.4	68.7	91.6	95.7	73.3	61.7								47.8	49.3	71.1	41.5	63	59.5	272.8	244.7	324.9	155.4	236.7	116.7	109.5	132.7	127.1	100.9	102.8	126.2	82.4	40.5	54.3	179.5	170.1	164.9	199	292.9	78.4	62.8	72.6	261.9	85.2	191.3	290.7	74.6	164.1
A0A287WCS9	146.9	79.6	249.4	113.4	72	116.7	94	66.4	99.1	49.8	50.8	27.5	48.3	125.4	18.6	114	32.6	139.7	66.6	114.6	545.6	77.6	21.7	322.7	62.4	277.8	74.3	68.4	89.2	67.7	82.6	165.7	21.2	46.7	107.2	59.7	98.3	92.1	161.6	91.4	98.2	123.1	15.2	189.8	2.7	141.3	265.2	121.3	117.8
M0VJ84	214.9	201.9	258									154.3	168.3	144.9															93	152.6	136.2							367.7	314.6	282.2	104	101.7	103.9	197.9	159.1	157
A0A287GWJ0	115.6	34	79.8					103.2	188	183.6	132.8	128.6	118.2	195.9	144.4	211.9	146.9	168.3	171.9	124.1							121.7	188.6				131.9	107.6	118.7	37.9	41.2	38.9	212.3	95.3	137.3	166.4	94.1	141.9	140.3	128.5	91.7
A0A287HJA4	123.8	116.3	114.4	109.5	132.9										95.9	60.2	102.9	112.9	231.4	150	84.8	115.6	95.5						121	83.2	97.4	150	114.8	79.1	126.6	77.3	138.8				138.7	122.4	146.2
A0A287KV81																					543.8	409	497.4												269.7	452.6	279.6							293.4	205.8	395	433.6	254.1	276.3
F2CQT6	224.8	192.5	176.6	124.6	158.5	92.5	99.6	129.9	134.3	150.1	90	98.7	103.2	117.4	134.8	108.4	92.3	133.6	172.7	152.9				69.1	84.1	84.3	158.2	162.7	57.1	75.9	82.5				139.7	119.2	108.4	210	162.2	131.2	174.5	176.6	171.3	97.1	106.3	106.4	75.3	91.9	60.4
F2EL93
A0A287X1T6	183.5	188.6	178.1	204.3	211.1							231.4	238.3	186.4	293.8	173.8	174.1	184.5	206.6	197.2	230.4	270.9	175.2	162.7	130.5	153.5			205.7	250.4	383							272.2	163.8	208	235.8	152.1	210.1
M0Y242	67.5	53.2	41.2															64.9	52	107.8							50.5	43.4	144	88	161.5				96.5	91.9	111	706.3	1357.3	63	153.7	154	190.6	454.9	312.5	34.9	352.9	183.2	72
P93191						679.6	767.4																									548.1	622.8	635.9				1199.2	1030.9	1222.5				561.6	506.7	521.4
F2D6T1	297.4	157.8	336.9																					228.5	270.2	244.1			448.2	435.2	436.3										429.9	293	274.1				200.9	499.2	281.3
F2DE66	220	289.4	306.6	183	215.7	822.1	895.5								150.8	127.9	79.3												309.6	287.5	248.2										103.4	182.8	225.3				151.7	285.9	193.2
A0A287S072
A0A287GPL7	70.5	92.3	77.5	211.5	272.3	70	67	43.8	83.8	68	76.5	64.9	76	35.2	231	35.2	183.4				100.7	56.5	52.8									69	75.3	65.1	46.9	70.1	129	62.7	136.7	107	88.4	64.5	51.5				66.6	72.9	58.9
A0A287SLC9	216.3	185.5	264.1	186.5	236.8										684.3	227.1	531.8	185.3	167.5	102.5	152.9	147.4	135.9	142.3	118.2	79.5	74	114.2							134.9	88.1	133.5							198.9	170	200.9	180.6	243.8	247.7
A0A287T3E6	203.3	392.6	277.7	281.1	325.6			120.5	99.9						96.1	51.1	96				41.7	112.3	139.4	81.8	118.2	80.6						367.1	262.6	360	174	123.2	301.7	131.3	217.6	168.4	155.9	139.2	152.5
F2DT98	76.1	97.8	63.3	100.6	119.7	48.2	84.5	82.3	123.2	158.8	103.3	67.3	144.1	180.5	174.4	116.8	109.6	68.2	81.8	61.2	93.5	95.6	120.1	180.6	137.7	198.6	88.9	187.4	69.2	185.8	63.5	58.3	50.9	62	119	106.2	81.4	173.6	163.1	83.3	149.4	91.8	93.1	101.6	76.1	90.2	90	143.7	105.8
A0A287W624																					453.1	156.2	568.1	244.6	255.1	279.2																		303.8	222.2	257.3	589.7	607	523.5
M0WB23
M0YQV8
A0A287VJ12	216.4	227.3	272.5																		956	942.5	1330.7									272.6	355.9	301.2													547.5	610.8	410.6
F2DDV7	83.2	141.2	116.8	104.2	94.1	104.1	95.6	104.9	120.2	114.1	98.3	81.3	70.4	144.7	139	178.3	86.7	127.5	126.1	154	122.9	62.2	125.2	132.5	120.1	122.5	190.1	154	92.7	74	111.1	71.9	93.3	64.9	82.6	87.6	105.7	100.8	127.8	97.7	82.5	121.3	94	89.6	75.9	96.9	113.6	76.6	194.5
F2DLP9	126.1	101.5	117.8	131.2	127.1	57.7	109.8	265.1	139.9	152.9	117.7	90.9	173.5	95.6	150.4	95.8	129.2	114.6	203.6	171.8	55.1	72.6	122.2	35.6	90.3	131.9	62.9	153.6	76.9	134	103	84.2	130.4	59.2	121.7	65.3	127.5	129	116.8	48.4	133.9	52.6	102.1	47.1	232.9	55	35.4	96.8	65.6
A0A287JTU1	54.4	80.9	28	26.1	90.2	35.9	43.2	89.4	7.5			64.9	67.9	81.3	19.7	17.2	152.9	92.5	213.8	114.9	58.2	181.1	128.6	88.8	23.1	50.4	68.6	114.8	41.8	183.9	21	28.1	145.9	132.5	52.1	40.4	19.9	368.4	39.8	119.5	95.2	200.9	38.5	54.7	174.8	68	17.5	14.3	15.7
A0A287TZI6	322.3	252.5	248.9	155.9	197.5							459.5	130.9	254.4				150.8	231.5	318.3	214.1	252.2	176				133.4	173.6										476.4	396.8	389.1	261.5	217.5	190.9				154.8	171.6	206.4
A0A287THB5	170.9	261.6	226.1	120.4	123.7	87.1	86.9					103.7	80.2	126.5				141.5	133.8	74.4	159.7	177.8	146.5	136.1	144.6	132.8	179.5	192.9										147.3	114.9	122							118.6	146.9	114.2
F2D5K9	127.5	182.5	162.5	70.6	73.5	148.4	122.4					109.9	56.1	81.7	70.2	78.6	83.9	136.9	122.5	109.5	492.4	68.1	209.3	439	79.6	303.8	73.8	54.5	70.2	58	91.5	161.4	102.4	184.2	80	144	53.8	80.8	87.8	95.7	86.8	86.4	84.9	164.5	168.2	168.4	239.8	82.7	207.8
A0A287UBZ4
A0A287F5K5	261.5	254.9	343.2			145.6	446.5					98.3	142.7	135.4	142.6	109.9	104.7	141.2	167.9	211.9	323.1	359	203	291.3	177.3	199.8			148.1	168.2	215.9	209.7	140.1	248.2	98.9	120.7	114.2	134.6	115.8	109				162.8	179.7	102
A0A287GX97	107.1	172.2	124.4	168.6	166.5	110.1	43.5	108.3	95.5	105	166.3	178	86.5	78.7	100.2	70.8	56.1	77.8	55.1	121.5	70.9	284.4	323	50.9	72.7	50.5	188.7	156.3	98.8	98.6	89.7	57.3	177.6	179.2	92.5	111.5	193	82.8	105.1	127.4	149.3	110.2	144.6	89.4	168.9	122.1	49.6	64.5	94.7
F2CWW1	96	100.7	67.1	74	124.5	80.8	113.8	154.3	156.9	137.7	156.8	121.9	91.4	86.8	82	41.6	146.4	56.5	130.1	75.3	17.4	59.5	35.3	59.4	135.8	72.2	41.4	113.3	72.4	69.7	107.4	50.7	68.1	68.2	58.7	42.1	62	133.2	129.5	57.7	106.1	91.9	63.3	153.7	96.7	149.1	64.1	92.4	50.7
F2DPK4				358	314.8
A0A287GN14	361.8	307.3	422.9															253.2	139.9	231.1	587.1	691.4	536.9												188.3	192.3	222.1	376.8	305	380.4	165.2	216.3	144.9	184.7	236.8	211.3	347	415.1	320.1
M0WMQ0	141.6	136.7	146.5	253.7	349.3	183.6	160.5			305.2	345.7				99.3	134.6	99.8	191.1	173.4	165.4				163.4	276.4	189.5	196.3	170.7							173.1	158.1	176.8	109.5	136.8	147.5							174	163.6	242.3
F2DNA9
A0A287K5Z0																		326	266.4	266.9	202.3	267.8	335.9						687.5	591	507.1	635.5	388.8	550.1										281.7	229.7	260.3
A0A287P260	158.9	158.5	212.2					217.5	181.7			243.5	322	296.1										158.3	106.1	151.8			100.4	59.1	113.6	123	258.6	289	136.9	150.5	176	215	214.3	148.5	165.7	127.2	133				96.4	152.1	137.5
A0A287NDL5						190.4	213.4	94.4	96						426.3	366	518.5				242.7	245.7	248.8	145.7	136.4	164
A0A287WDK6				227.4	304.1			311.9	445.7	226.8	361.8	280	276.2	459.8																					347.9	305	297.8	349.9	293.3	259.7				267.1	414	318.7
A0A287FRC5
A0A287U3A1	259.3	179.6	148.9	122	140.2			238.2	97.6	231.6	270.6	103.2	56.9	83.2										108.4	118.9	96			100.6	95.5	269.8				117.9	136.7	128.7	106.1	139.3	124.8	95.9	60.1	129				94.9	85.5	97.5
A0A287FQ66	225.2	187.1	242.5			226.3	169.5											155.9	158.9	157.9	319.4	173.2	270.1	406	367.2	269			171.6	310.7	187.7				180.9	176.7	117.6							228.6	241.1	172.4	249.7	183.3	257.6
A0A287XUW1
A0A287KMC2
A0A287NWM2	246.1	111.7	191.2					213.8	219.3	187.2	185.2				148.8	99.1	159.2	344.3	279.7	251.8							159.6	163.9	157.5	366.2	185.2				139.8	106.6	156.1				219.1	204.3	165.4				87.1	105.9	113.5
A0A287T108	27.5	30.8	38.6	78	15.9	81	39.7	40.1	28.7	9	38.1	22.5	59.4	18.3	21.3	17	20.5	24.7	41.9	70.6	34.4	43.5	37.6	42.9	24	53.9	71.7	4.7	30.8	59	51.5	118.3	64.1	84.8	21.9	33.2	27.3	90.3	20.9	39	73.2	48.8	5.9	52.7	47.4	93.5	37.8	19.1	58.4
A0A287PSU1	414.2	355.4	348.4	158.3	76.7					119	79.1	108.7	74.4	113.4	88.4	151.4	172.6	166.5	108	106.5	364.2	480.7	436.6	863.6	129.8	267.9			170.2	186.4	218.2				106	175.6	142.2	99.4	119.8	130.2	92.1	86	92.8	170.1	154.9	99.7	299.2	67.3	121.1
Q8LLA7	64.9	31.2	38.2	86.5	93.2	403.5	257.1	77.7	207.5	221.2	102.3				93.5	94.7	46.9				27.5	50.3	49.9	98.8	152.7	187.3	160	80.1	102.8	109.5	111.3	61.6	136.5	233.8	191.8	153.2	135.4	48.7	45	43.3				149	255.1	170.3	163.3	103.5	218.8
F2DPX8				208.9	169.9	170.3	204.1			200.1	216.1							185.1	242.8	180.6	165.5	233.4	164	155.2	132.5	157.7			216.3	251.7	302.7	208.6	122.1	144.9				285.5	240.4	200	205.4	205.4	174.6
F2DBI7	84.2	47.9	46.8	223.1	40.4	218.1	803.2	20.5	21.3			45.3	37.7	40.1	91.9	186.7	181.2	934.5	49.2	84.3	770.9	110.5	123.1	451.9	764.5	343.5	104.8	234.2	67.6	35.7	63.9	217.4	42.9	97.3	39.2	45.5	35.6	15.2	21.5	31.6	61.7	21.3	123.5	132.7	31.4	256.7	134	105.1	43.7
A0A386GZI0	208	96.9	83.1	120.1	84.5	149.9	161.4	88.2	90	53.2	98.9	83.4	71.2	88.6				259.6	254.3	208.6	50.2	61.7	25.6	95.3	92.4	46.9	174.3	116.8	319.8	430.2	411	271	126.9	59.7	132.6	145.7	111.7	105.3	153.7	206.4	103.2	34.7	57	44	89	149.2	34.6	113.5	71.3
F2EF07						256.8	270					311.7	257.6	156.1	212	96.5	175.4																		164.3	188.4	147.3							233.3	160.2	115.8	209.6	131.9	97.5
M0Y7Q2
A0A287VFM8	405	351.7	298.7					311	349.9						273	266.7	238.2	357.9	279.6	407.8	108.6	139.4	81.7									298.3	141.7	213				338.8	355.3	384.6
A0A287N3F8	58.2	72.5	51.3	77.7	98.8	70.9	95.9	96.6	84.6	108	289.7	63.4	149.1	90.6	58.7	104.6	296.5	119.6	95.7	118.5	116.1	107.8	39.3	103.5	106	323	78	150.2	61.3	131	112.6	54.5	55.9	33.2	95.8	93.6	94	88.4	125.6	52	111.5	101	47.6	140.9	238.4	96.1	93.7	84.5	120.9
F2D8C5
A0A287WNB3	238.8	231.6	224.3					152.8	126.6	110.1	96.4	251.6	256.8	262.3	192.5	181	202.5	179.6	244.8	131.4	114.9	163.7	113.7	109.5	162.9	125.3			269.5	358.1	340.4	113.7	303.3	277.4	303.9	241.4	230										78.6	118.3	103.7
F2DCT0															130.4	106.4	104.5																								510.4	168.8	330.4	127.3	133.1	134.3
F2E3F5	123.3	229	206.6			171.8	189.9																																								330.8	416.6	416.5
A0A287J5Q6	209.1	296.7	328.7	243.1	280.7	248.5	230.5			252.7	224.7	201.2	146.8	231.8										282	264	337.6	369.9	347.6
A0A287N353	297.9	272.6	305.1					284.8	359.4			175.2	152.8	172.1				182.2	162.4	178.5	177.5	325.5	240.3						272.2	232.2	221.6	355.8	377.7	493	188.5	236.8	164.3
A0A287HT33
A0A287NBH6				264.4	275.5					621.3	512.8																					439.5	343.3	322.8							298.3	227.3	234.2
A0A287FBJ9	0.6	1.8	0.9	1.2	1.6	0.7	1.8	0.6	2.1	2.3	1	0.8	1.2	2.1	7.6	0.9	1.6	2	0.1	1	3.4	0.6	4.1	1.2	2.7	1.1	0.7	1.2	2.1	0.7	0.7	1.8	0.6	1	0.7	1.5	0.4	13.5	1	2.1	5.2	0.9	1.5	0.9	0.9	1.6	1.2	2.2	0.2
A0A287QPF4
A0A287MJC2	119.5	97.6	96			153.1	199.8	80.2	144.6	138.9	172.7				237.1	53.5	153.4	95.2	173.1	120.7	140.6	80.6	125.2	57.5	119.9	47.5	65.4	68.4	160	80.9	136.2	176	165.4	207.9	72.9	78.3	72.9	113.7	134.9	95.2	88.1	169.2	195.9	134.5	217.6	140.2	105.9	81	153.5
F2CWI3				99.5	211.8			393.4	381.4	356.5	291.5	59.9	78.4	218	190.6	237.5	428.5	164.8	104.2	165.2	57.6	180.2	154.9	168.5	253.9	188	422.6	369.9	335.3	473.3	197.5	136.6	80.9	108.9	263	104.5	109.7	146.9	111.2	151.9				102.6	148.6	102.8
F2CQG1
A0A287NYX4
F2DGE6				137.7	180.2	167.8	132.6					135.9	135.4	154.3	176.7	151.6	181.4	140.7	143.7	157.4				191.8	135.5	202.5			117.7	197	137.8	168	85.7	158.4	184.9	165.1	180.5	243.3	169.6	186.1	153.7	124.2	176.1	180.4	232.4	256.3	211.5	167.4	206.3
A0A287FR63				93.9	47.4	58.7	48.4			53.3	41.9	28.5	38.7	30.9	47.1	24.5	53.2	83.4	258.6	355.4	24	32.6	18.5	36.1	36.6	26.6	68.6	62.4	52.9	67.3	45.6	178.9	141.8	163.1	58.5	68.9	133.8	61.9	44.2	69.3				236.6	141	204	144.6	139	131.5
A0A287SH79	116.1	72.1	216.7	83.3	67.2	132	175.4	57.6	62.5	69.3	66.5	20.2	78.7	135.1	22.2	129.9	30.7	168.1	47.8	136	384	57.9	46.6	282.5	101.4	235.8	111.3	75.7	338.6	59.2	103.3	113.1	26.1	42.9	212.3	244.8	141.8	24.7	86	105.2	92.7	56.9	24.2	203	38.4	182.2	207.6	173.3	45.8
A0A287HDY1
A0A287FAB3	188.5	133.2	108.8	147.7	154.1	110.1	197.1	240.4	264.2	237	230.2	151.9	170.2	110.2	150.7	204.8	170.9	129.5	102.7	120.6	164.4	163.7	110.8	208.9	222.4	277	111.9	173.7	140	160.4	133	130.2	113	114.8				109.1	139.9	74	103.2	125.6	114.5	165.9	176.9	183.1	209.2	220.6	345.4
F2DQB6
Q40048
A0A287U371						177.4	112.7	213.1	197.1	483.5	491.3	340.6	297.2	288.5							97.9	183.7	215	369.5	440.4	174.3	360.5	455.3	100.8	83.1	145.9	122.7	148	147.9	162.4	187.2	182.1	134.5	76	129.6	51.1	68	73.4	89.6	77	48.8	72.4	111.2	104.1
A0A287U7L4
M0VG14	127.4	60.1	63	114.6	74.2	136.5	50.5	120.1	54.9	116.7	197.4	52.2	40.8	63.6	68.3	154.6	122.1	67.2	82.1	85	119.9	88.9	124.2	128.9	99	139.1	98.3	81.3	136.1	137.1	96.6	95.8	167.6	145.1				65.5	91	76.3	165.3	92.9	37.6	69.4	71	85.7	113.2	53.8	203.1
A0A287TFS6	216.7	213.2	167.8	167.6	161.9										315.9	256.7	192.9										167.4	206										323.5	232.8	327.9
A0A287SGK1	287.6	151	388.6							523.9	578.6													184.6	573.7	275.8			485	407.9	223.4							274.9	278.3	246				323.9	91	203.1	321.3	200	452.3
A0A287RBR8	171.4	106.5	163.8			147.3	180.6																	201.9	197.1	120.4			73	144.3	126.7	186.4	169.7	191.3				91.5	97.6	122.5				221.3	301.6	303.8	304.7	151.8	157.9
A0A287Q3Q1
A0A287PL47
M0UGW6	238.7	128	217.7	67.1	63.7	51.6	223.9	50.1	54.5	71.7	56.2	138.8	56.8	161.7	141.9	140.5	81.2	204.1	182.2	114.5	323.5	36.6	196.1	657.3	140.4	187.2	40.1	140.7	64.5	20.9	20.4				221	193.5	170.3	43.5	52.3	34.7	25.6	21.5	20.3	85.5	78.9	85.2	135.3	90.6	164
A0A287THZ1	244.6	211.9	102.7	76.8	37.9	9.2	8.1	144.7	51			19.8	27.8	26.5	201.9	86.9	173.8	69.5	77	57.2	38.5	28	141.8	90.7	128.1	180.5	106.6	92.2				12.4	17.9	11.9	54.6	57.2	80.7	447.3	161.9	227.3	182.4	109.8	211.8	235.3	20.9	207	97.8	111.6	63.1
A0A287VIK2				134.3	138.5			154.7	154.1						197.4	223.3	195.7				257.1	146.4	324.6									169.6	171.9	160							168.5	176.1	179.8
F2DY67						232	294.6											45	63.7	67.8				144.6	173.6	143.8												100.8	77.4	88.1	82.4	79.4	81.7	439.6	376.5	464.4	681.6	244.8	184.8
A0A287NQC6	218.1	183.4	286.4					215.8	183.6			265.8	262	226.2	162.7	189	181.2	140.3	144.4	161.4									78	79.4	106.6	103.1	103.1	110.5	112	142.9	127.1	88.3	145.8	120.7	191.4	189.6	215.1	150	236.9	128.7	120.9	144.6	227.7
F2D0S0	117.3	127.3	140.3			253.9	26.1					54.7	125.4	102.7				315.6	212	327.5	178.6	305	161.8	73.9	55.3	64.6	324.8	292.8	145.4	135.4	133.4	47.7	43.5	52.3	34.8	251.8	463.4	73.6	83.6	110.6	23	23.1	18.5	2813.9	2161.2	583.9	18.1	15.5	19.9
A0A287M3J9	102.7	54.4	161.4	166.5	145.7	110.4	189					129.5	101.4	109.1	116.9	120.9	146.5	92.6	85	108.6	422.3	738.8	485.9	252.9	188.3	193.4			122.3	224	191.9	119.9	99.6	69.5	143.1	150.1	153.9	116.8	107.4	108.4	176.3	115.1	151.7	134.5	147	116.4	125.1	64	76.2
P08817	62.1	96.2	33.6	112.5	209.7	201.8	79.1	80.9	132.7	83.7	189.5	99	73.6	111.3	95.2	33.4	61.7	91.7	123.1	158.4	25.9	109.5	188.4	110	163.1	93.7	78.7	181.3	43.3	51.6	32.2	83.4	159	131.1	137	143	115.8	76.9	68.5	35.5	168.2	57.1	112.9	113.4	118.7	69.1	69.5	63.6	122.2
F2CUT4	207.9	210.5	235.6	100.9	130.8					165.9	203.3				309.3	307.9	350.3	175.7	190.9	205									139.9	162.1	165.9	115.5	32.4	105.3	178.1	261.5	192.6										353.8	533.5	456.3
F2CVP8	180.9	148.8	178.4	172.2	95.6	136.9	116.3					115.1	90.9	118.6	227.9	183.6	210.2	119.9	130.6	139.9	136.3	129.2	96.9	181.3	188.7	151.1						157.3	160.8	139.7				218.1	154.5	119.2	198	197.9	127.1	195.1	118.3	149.1	144.6	259.1	249.4
M0WNW4	197.4	222.4	144.9	268	264.3	164.1	180.9					151.2	111.2	149.8	169.9	167.4	150.6	133.7	113.8	106.4							103.6	113.5	180.4	139.8	187.3	151.9	207.2	83.9				137.8	95.8	88.8	208.4	189.6	210.6	115.7	134.8	133.4
A0A287LF16	242.2	260.7	360.1					225.1	249.9									217.7	315.4	288.4							190.3	207							227.2	271.9	298.1							271.5	379.7	260.2
A0A287KIY3				147.8	157.6	130.7	125.8								80.4	71.3	80.3	87.3	109.4	135	265.6	132.8	165.2	114.4	133.9	139.5			105.3	115.5	129.8				85.6	81.2	93.4	233.4	93.4	262.1	152.3	143.2	60.5	144.2	170	149.1
A0A287GUI5																		212	184.5	176.5									320.3	253.2	302.7	324.6	295.7	216										286	337.7	350.4	150.3	233.8	308.6
A0A287X340	46.5	105.1	59.9	50.6	90.6	77.1	98.9	135.3	110.4	120.1	104.9	101	111.6	82.5	130	69.1	93.1	145.2	145.5	155.2	60.5	82.9	168.8	50.4	154.1	50.9	101.4	91.7	85.6	164.6	66.5	69.9	109.2	107.2	80.6	111.2	64	227	63.6	54.5	138.2	80.6	102.3	55.3	171.4	51.3	61.7	125	60.1
A0A287VUI6	356.5	254.2	234.4			36.6	32.8	241.4	332.7	460.5	168.6	315	587.1	252.4	173.5	196	64	214	232	185.8	36.3	162.9	111.6	168.7	197.3	36.7			283.1	318.2	336				88.8	394.7	289.9				211.9	201.6	190.2
A0A287NYM5	125.8	168.9	125.7	180.2	197.4	61.3	144.1	93.7	92.5	299.1	109.5	145.7	146.1	129.6	237.4	148.2	164.9	134.5	56.9	95.5	403.6	289.2	263.9	91	132.6	114.8	124.5	127.2	281.2	212.3	215.6				128.9	150.3	110.8				84.5	71.6	89.7	120.9	129.1	131
M0UU30
A0A287HHQ0	242.1	298.8	244.4	168.6	86.8	199.1	213.3	245.3	228.6			297.1	260.5	249.3							276.8	152.8	217	194.5	226.6	178.3	194.7	214.7				237.9	181.5	448.2	175.9	136	212.4	153.3	145.4	179.5				187.7	166.8	140.1	196.4	225.4	138.4
F2D3M5																																												377.7	410.9	424.1	298.3	357.4	275.1
M0WVP6	192.4	131.8	90.4	191	102.4	132.8	103.5	183.2	118.4	105.3	153.9	286.7	132.6	89.4	147.9	87.9	139.1	66.7	110.9	133.8	42.9	126.7	61.9	49.3	100.5	78.9	156.3	116.4	67	135.5	143.7	127.6	137	101.9	83.6	51	122.1	65.5	182.4	110.6	85.5	95.9	126.7	127.7	177.1	148.5	69.2	48.6	238.5
A0A287XDP9				194.1	240.1	381.7	337.5	195	260			196	192.8	187	176.8	200	192.5	116.1	100.4	110	86	101.6	89.2				144.3	542.2	68.5	98.8	85.9				280	140.9	209.5				134.7	90.2	171.7	162.6	133.3	181.2
M0W0Y5
A0A287LAH7						541.5	566.7	276.9	244.4	894.4	1663.1	329.5	325.9	266.4	2026.6	705.3	877.1				222	291.6	357.7															174.6	374.6	304.2							180.3	117.4	179.3
M0X0B4
M0Y8M7	142.1	107	195.2									113.5	116.8	126.2	73.8	88.3	89.6				410.8	96.7	232.2	185.6	177.5	190.8									189.5	231.7	283.6
M0UGL3	146.6	169.2	201.5	545.2	337.3	136.8	162.6	501.9	408.5			428.6	427.7	344.6	411.4	263.8	248.2				150.1	213.3	236.6				218.4	384.5	90.5	115	116.1	350.7	317.3	391.2	235.4	367.9	356.9				100.7	137.6	171.3				204.2	271.1	352.3
F2CTS8
F2DZY4	87.6	111.3	57.7	68.8	185.9	66.6	148.5	91.9	79.5	124.2	145.3	70.6	120	53.4	247.4	188.7	188.1	76.4	140.6	218.2	60.1	74.6	178.3	195.4	222.1	115	48.4	226.9	157.1	74.3	110.9	57.8	105.4	58.4	293.4	137.2	98.8	198.2	74	54.7	101.6	49.6	61.7	41.4	323.9	54.2	36.3	65.1	77.1
A0A287ND84	150.8	35.4	81	83.6	84.6	170.4	27.3	87.5	97.2			125.8	164.1	126.3	36.9	35.9	25.4	84.7	64.8	81.3	63.8	56.3	84.2	25.2	25.4	37.7	78.3	25.9	121	90.3	128.5	134.3	52.6	86.8	38	66.6	71.3	193.4	212.9	127.9	82.2	79.3	58.6	201.7	81.4	173.3	125	53.7	92
A0A287F4U4	1.4	7.3	3.7	19.1	15.1	3.5	25.9	4.4	4.1	11.9	3.6	6.7	2.6	4.1	11.9	10.6	12.3	15.2	20.1	15.4	2.1	4.3	12.2	1.9	2.6	2.6	4.1	5.5	5.2	5.3	3.4	6.7	8.5	12.2	9.2	8.3	7.5	13.9	7.4	7.9	14	18.1	15.5	9.5	11.3	10.3	4.4	6.2	7.9
A0A287XAI0	84.1	106	89.9									366.9	323.8	260.6										165.7	150	190.1									470.1	529.3	536.3										184.2	229.6	195.4
A0A287RV06	47.6	180.4	224.4	175.2	119.4	174.2	104	137	104.2	131.6	115.3	328.6	158.8	104.6	41.3	28.4	177.6	66.9	242.4	361.7	23.5	138.8	59.9	107	111.4	81.8	114.1	186.3	66.9	111.9	92.4	47	98.1	112.7	78.7	101.9	291.5	79.3	89.5	109.9	130.7	94.8	70.8	147.6	198.7	135.6	75.5	100.2	140.1
A0A287WL84
A0A287TKC1	208.8	143.6	93					151.7	128.2			104.7	112.6	85.6							68.2	64.3	48.7				126.7	145.7	121.6	175.6	151.6	162.5	173.7	162				183.2	190.2	236.7	168.5	152.6	128.4				106.4	83.1	108
A0A287TJ98
A0A287NLQ0															173.5	115.1	154.2										211.8	146.5				343	334.1	308.3				183.2	172.2	174.6
A0A287RNF9	595.9	744.2	606.3			277.1	243																						544	500.5	358.1							613.9	652.3	549.5				499.8	681.3	861.1	183.8	169.8	232.7
A0A287RSZ4						210.8	164.9					778	710.1	813.6	706.2	680.8	744.3	1001.8	954	1210.4				538.1	330.9	476.3									413	373.9	461.3
A0A287KWV5															228.9	315.7	204.1	184.3	180	131.7	87.4	147.3	152												331.2	241.2	173.4	126.5	82.8	103.1				202.7	231.3	204.4
F2E931	231.9	182	194.9			139.7	87.5	200.7	216.1	93.6	98.3	142.3	109.4	122.3				76	73.3	160.6				173.4	231.5	192.3									82.1	132.8	271.1				87.4	160.9	135.8	107.2	75.9	71.8
F2CVY7
A0A287T4U5	133.8	111.9	61.3					113.8	141.2	133.5	101.4	121.2	155.9	148.9	152.9	52.2	98.4	103.2	88.3	93				132.3	134.9	149.7	134.8	119.9	68.9	107.9	92.3	162.2	161	185.5	120.5	106.4	135.7	123.1	101.7	112.9				117.5	142.2	122.9	100.3	160.8	137
A0A287SQM7	218.6	325.8	348			482.5	487											193.8	225.6	226.8	601.9	577.4	530.2	376.8	303.2	423.5																		412.8	342.1	465	345.9	342.3	292.2
F2EI02								57.7	67.9						65.1	26.4	70.9															64.3	83.6	76				22.9	17.9	20.1
F2CXH4
A0A287GQH9
F2D0T9						145	200.2	366.5	362.3	205.4	364.6	104.9	216.9	150										167.4	218.8	191.3			135.5	213.7	275.3	110.1	136.3	164	237.1	186.8	214.1							186	176.2	144.1	210.1	173	225
A0A287ELI3	65.1	54.8	38.3	46.2	42.4	40.7	39.7			64.4	47.6	82.2	153.6	127.6	55.2	12.6	76.8	69.2	178	105.6	43.9	184	126.1	61.6	56.9	50.5	73.8	95.2	183.6	163.9	129.4	12.3	219.8	132.3	78.2	79.5	34.4	277	60.2	25.9	149.2	171.6	62.7	89.4	123.6	122.3	18.3	23.3	16.9
A0A287RZT3	68.2	12.8	25	5.2	18.5	10.9	15.4	3.8	7	62.4	56.1	3.7	42.7	50.7	616.2	1.7	37.7	16.5	6.4	24.4	21.6	20.4	333	2.8	8.2	2.5	4.2	6.1	11.9	13.4	6.2	44.3	81.2	34.4	34.7	52.2	25.8	655.6	74.2	94.1	87.4	31.9	155.1	2.7	1.5	3.5	26.1	290.2	64.2
A0A287R6Z4	137.2	78	69.3	154.4	75.1	39.9	24.1	127.8	91.8	40.3	34	111.5	68.7	100.2	73	63	85.8	42.7	129.8	114.6	29.1	95.8	61.7	35.6	53.6	42	83.3	68.5	23.4	77	76.7	63.1	110.6	129	42.8	32.5	103.1	186.1	300.2	63.9	57.6	94	60.9	68.5	43.9	96.9	47.6	133.7	190.7
M0XGS5	82	103.4	91.7			160.2	89.7			47.9	38.5	149.6	154.2	132.1	53.8	55.3	67.5	78.3	81.3	68.4				102.5	91.3	95.1	92.1	74.3	81.1	61	110.2	63.8	123.3	95.6				77.8	140.2	178.2	193.2	34.2	118	185.8	198.7	191.6	207.4	228.6	191.5
A0A287Y1U4
F2CV01
A0A287HQY3				210.9	211.8							237.1	232.9	246				235	253.5	207.7	517.6	491.7	582.6												270.1	204.1	291.2
F2D6D2	231.8	285.3	323.1					372.1	343.1	306.3	284.4				189.9	246.3	176.6	173.5	199.9	218.1	297.7	324.5	439.1	175.1	215.6	154.9			288.8	332.5	320.5										256.5	175.7	238
A0A287RXH7	215	209.9	233.8					256.8	243.4	204.6	261.9							239.5	252.3	281.3																		301.5	237.8	249.5	205.9	240.3	176.8
F2DYK0	225.2	11.1	28.3			411.5	453.3	274.6	270.7	39.3	36.9	251	184.8	54.8	10.9	18	12	19.8	102.2	160	8.6	114.3	34.7				133.4	39.6	16.2	14.3	13.4	285.8	235.2	156.4	41	53.6	41.5	235.9	195.4	196.1	171.8	177.9	238.1	340.6	293.8	177	121.4	125.7	192.7
A0A287I6W0	217	160.3	248.7	236.6	278.5	159	121.5	91.7	88.8	142.3	227.3	333.2	146.4	221.2	123.6	27.5	96.8				62	113.8	105.9				50.7	224.8				128.9	69.8	313	46.7	38.7	162.4	44.1	91.9	160.2	131.1	123.3	97.8	105.9	114.6	107.3	252.3	251.6	249.7
A0A287F927
M0VSA8
A0A287KU00
F2D561	142.8	130.4	140.5	108.8	135.2			207.3	180	193.1	170.8	199.9	90.3	194.4	116.7	161.6	134.1	162.5	116.2	137.9				124.8	113.4	113			193.7	195.7	185.8	237.4	124.1	169.1				112.3	200.5	227.6	148.5	109	183.1				121.2	130.9	127
M0V6H7	253.9	175.3	210.7			42.6	52.9	145.4	64.5	129.9	154.5	219.7	101.3	113.6	50.5	38.7	49	47.7	66.2	131.6							56.9	81.4	60.3	120.3	186	61.6	87.5	76.2	149.9	99.6	74.5	101	109.6	65.3	59	45.5	44.8	218.3	210.2	197.4	102.4	185	101.2
H6V9Z8				67.6	80.9										547.9	390.5	370.1				70.5	130.5	242.8	139.5	247	308.1			309.4	251.9	325.6				176.2	174.2	121.4
A0A287VC69						202.8	204.1
F2EAV7	303.7	559.6	459.8									584.4	138.3	305.9	165.9	165.7	205.3												300.8	255.3	269.3	256.1	242.8	183	252.7	213.2	183	403.8	344	234
A0A287Q6A4
A0A287UKQ7	91.1	167.4	80.6	90.3	152.5	97.6	84.1	106.7	104.5	92.6	76.3	137.6	122	74.8				154.4	150.2	130.6	55.7	100.2	104.1				126.7	119.7	114.8	116.7	130.8	111.3	150.7	116.4	64.4	122.7	125	202.5	137	72.6							59.1	110.2	111.6
A0A287TFZ4																					763	531.8	944.7									448.9	395.8	567.2													300.3	186.7	308.9
A0A287HDD6
F2DW94	156.7	96.1	42.9	66.1	56	199.6	145.5								49	50.9	60.8							94.8	95.7	97	37.5	37.3				140.1	92	265.4				113.4	119.5	155.5	171.9	116.6	129.2	120.6	134.2	173.3	159.1	212.2	183.8
A0A287G3N7																																															549.5	562.1	755.9
A0A287SDC5	166.9	165.1	196			216.1	159.8	152.4	183.4			186.8	208.1	213.8													39.6	37.2	299.6	291.9	247.6	146.9	117.2	172.9				122	114.9	92	62.5	182	126	105.9	119	79.1	84.9	85.5	123.7
F2EFS9								246.6	272.4																				452.8	338.8	349.4							303.5	349.6	173	433.4	360.8	434.7
A0A287KAV9	114.3	245.1	120	102	142.8			103.3	147.7	118.4	110.3	79.8	134.5	170.1	122.9	83.4	125.6	138.1	148.4	174.5	77.2	169	168.7				188.3	152.6				84.7	119.2	106.1	130.9	163.7	181.7	227.7	67.8	283.1	119.8	132.9	113.5
A0A287SLP2	43.1	102.2	62.5	80.9	162.3	77.9	184.9	48.9	117.6	231.7	221.3	55.9	194.7	93	193.4	86.9	152.2	249.5	131.6	68.2	33.1	54.7	91.1	28.7	208.4	46.1	155.4	183.9	164.6	91	101.2	109.2	43	83.7	66.3	51.6	98.3	342.3	41.9	152.1	106.7	38.6	111.3	149.2	122.4	118.5	125.9	162.2	122.2
A0A287S7Y5	77.5	39.5	110.2	179.5	61.8	118.1	119.8	182.2	192.8	141.1	204.7	137.4	54.4	67.5	42.3	42.1	51.5	64.1	573.3	333	80.4	138.1	30.4						49.3	227.4	172	77.1	180.1	152.7	54.9	68.1	83.2	81.5	81.7	80	117.3	135.8	37.2				131.2	236.6	229.4
A0A287L6T7															330.9	273.8	355.1				1371.4	939.9	1180.2	1575.4	1036.9	270.4																		274.6	457.2	338.2	532.7	598.7	837.1
A0A287I2Y0
A0A287H2M6
A0A287M7F7	293.1	444.1	287.7	181.6	304.6	111.3	94.1	116.3	129			198.8	165.1	283.7	156.2	142.1	116.2	418.2	395.9	271.8	207.7	170	140.1	172.3	87.2	167.5	205.4	237.1				175.3	87.6	140	125.7	123.4	100	305.2	177.3	337.4	108.9	66.3	149.5	103.2	132.3	114.5	83	77.6	105.2
A0A287JT89	85.5	93.7	112					237.1	191												54.3	92.6	153	226.3	188.3	176.6																		271.1	365.8	371.1
A0A287UKL0
M0XTD9
A0A287FYN0
F2CQD4	234.7	217.3	104.5																								307	342.9	187.1	136.4	155.2
F2EJ61	114.1	203.5	64.4	142.6	111	132.8	162.9	307.4	180.8	117.1	366	79.6	226.5	144	194.4	51.2	219.7	169.3	82.9	131.9	57.8	195.2	232.5	36.6	205.3	47.9	141.2	206.5	61.2	145.1	98.8	189.7	170.7	68.2	189.7	248.2	179	53	57.6	27.9	194	98.1	57.9	108.9	179.6	131.5	57.7	132.5	79
[truncated: 105 more columns]
