# Supplementary material for: Global Proteome Profiling Revealed the Adaptive Reprogramming of Barley Flag Leaf to Drought and Elevated Temperature
Source: Cells. 2023 Jun 22;12(13):1685. doi: 10.3390/cells12131685 (PMC10340373; doi:10.3390/cells12131685)
Supplement: Supplementary file 1 [file cells-12-01685-s001.zip › Table S2.xlsx]

## Sheet: Sheet1
Table S2. Annotation and results of differential expression analysis of proteins for genotypes of different flag leaf size (small, medium, large) under drought (D), heat (H) and their combination (HD) at two time points (T1 and T2)
Protein identifier	Protein description	Protein FDR Confidence Combined	Annotation			Pfam identifier	Log2FC for contrasts D, H, HD v. control																		Protein identifier	Regulation status of DEPs in contrasts D, H, HD v. control [downregulation (-1), upregulation (1), no change (0)]																		Total number of significant contrasts	Number of significant contrasts in group
							Small						Medium						Large							Small						Medium						Large
							T1			T2			T1			T2			T1			T2				T1			T2			T1			T2			T1			T2
			Biological process	Cellular component	Molecular function		D	H	HD	D	H	HD	D	H	HD	D	H	HD	D	H	HD	D	H	HD		D	H	HD	D	H	HD	D	H	HD	D	H	HD	D	H	HD	D	H	HD		Small	Medium	Large	D	H
P05698	Ribulose bisphosphate carboxylase large chain OS=Hordeum vulgare OX=4513 GN=rbcL PE=3 SV=2	High	metabolic process		catalytic activity;metal ion binding	Pf00016,Pf02788	-0.37585	0.461401	1.0923	-1.26812	-0.827282	-1.0335	-0.0421658	0.0323822	0.153201	-1.18384	-0.389146	-0.945941	1.23996	0.793232	-0.239507	0.767036	0.73641	-0.979291	P05698	0	0	0	0	0	0	0	0	0	0	0	0	0	0	0	0	0	0	0	0	0	0	0	0
S4Z0F2	ATP synthase subunit beta, chloroplastic OS=Hordeum vulgare subsp. vulgare OX=112509 GN=atpB PE=3 SV=1	High	metabolic process;transport	membrane	catalytic activity;nucleotide binding;transporter activity	Pf00006,Pf00306,Pf02874	-0.436509	0.410418	1.38914	-0.606231	-0.350223	-0.138822	0.0389707	0.188146	0.16819	-0.941678	-0.165265	-0.378876	1.33992	0.767113	-0.0128514	0.482828	0.806549	-1.07274	S4Z0F2	0	0	0	0	0	0	0	0	0	0	0	0	0	0	0	0	0	0	0	0	0	0	0	0
A0A287NMR6	ATPase_AAA_core domain-containing protein OS=Hordeum vulgare subsp. vulgare OX=112509 PE=4 SV=1	High					-0.138007	0.0207087	0.335147	-0.870831	0.0548439	-0.733695	0.0558072	0.280148	0.0475828	-0.597767	0.296741	-0.474641	0.645055	0.375942	-0.0515923	0.205938	0.390332	-0.445556	A0A287NMR6	0	0	0	0	0	0	0	0	0	0	0	0	0	0	0	0	0	0	0	0	0	0	0	0
M0VRL8	Glycine cleavage system P protein OS=Hordeum vulgare subsp. vulgare OX=112509 PE=3 SV=1	High	metabolic process	mitochondrion	catalytic activity	Pf02347																			M0VRL8	0	0	0	0	0	0	0	0	0	0	0	0	0	0	0	0	0	0	0	0	0	0	0	0
M0Y1R9	Lipoxygenase OS=Hordeum vulgare subsp. vulgare OX=112509 PE=3 SV=1	High	metabolic process		catalytic activity;metal ion binding;protein binding	Pf00305,Pf01477	-0.175281	1.03077	1.2111	-2.28279	-0.043963	-2.08486	0.0278054	0.214416	0.281746	-0.582193	0.784989	-0.831452	1.04489	1.02343	-0.0999318	1.0211	1.52996	-0.245503	M0Y1R9	0	0	0	-1	0	-1	0	0	0	0	0	0	0	0	0	0	1	0	3	2	0	1	1	1
A1EA16	Ribulose bisphosphate carboxylase large chain OS=Agrostis stolonifera OX=63632 GN=rbcL PE=3 SV=1	High	metabolic process		catalytic activity;metal ion binding	Pf00016,Pf02788	0.930811	0.120768	0.459689	-0.0153112	-0.453212	-1.56563	-2.41519	-1.27856	-1.76475	0.227468	0.495079	0.270486	0.0262703	-0.228592	-1.56013	0.806408	-0.47259	0.478489	A1EA16	0	0	0	0	0	0	0	0	0	0	0	0	0	0	0	0	0	0	0	0	0	0	0	0
A0A287VK33	TRANSKETOLASE_1 domain-containing protein OS=Hordeum vulgare subsp. vulgare OX=112509 PE=4 SV=1	High					-0.257457	0.47718	1.41381	-0.868005	-0.326886	-0.680328	0.19835	0.199909	0.285603	-1.27047	-0.143593	-0.695139	1.18062	0.781569	0.0537792	0.587223	0.901489	-0.78944	A0A287VK33	0	0	0	0	0	0	0	0	0	0	0	0	0	0	0	0	0	0	0	0	0	0	0	0
M0Z2X3	Phosphoglycerate kinase OS=Hordeum vulgare subsp. vulgare OX=112509 PE=3 SV=1	High	metabolic process		catalytic activity;nucleotide binding	Pf00162	-0.522984	0.264505	1.02156	-0.971242	-0.567809	-0.559962	-0.0167628	0.0229775	0.0876666	-1.12058	-0.122314	-0.8673	1.2099	0.664017	0.0802317	0.672537	0.977845	-0.92675	M0Z2X3	0	0	0	0	0	0	0	0	0	0	0	0	0	0	0	0	0	0	0	0	0	0	0	0
A0A218LNH3	ATP synthase subunit alpha, chloroplastic OS=Hordeum vulgare OX=4513 GN=atpA PE=3 SV=1	High	metabolic process;transport	membrane	catalytic activity;nucleotide binding;transporter activity	Pf00006,Pf00306,Pf02874	-0.547423	0.182805	1.13123	-0.60358	-0.211209	-0.259621	-0.118001	0.00111689	0.077623	-1.01144	-0.10729	-0.609999	1.15455	0.521428	0.108056	0.451175	0.863854	-0.848199	A0A218LNH3	0	0	0	0	0	0	0	0	0	0	0	0	0	0	0	0	0	0	0	0	0	0	0	0
A0A287U6Y1	Elongation factor Tu OS=Hordeum vulgare subsp. vulgare OX=112509 PE=3 SV=1	High					-0.0157841	-0.0548137	0.216539	-0.0590567	0.0717777	0.247886	0.1479	0.202708	0.297863	-0.143346	0.00414946	0.595303	0.759693	0.244365	0.169031	0.0185245	0.00712236	-0.218995	A0A287U6Y1	0	0	0	0	0	0	0	0	0	0	0	0	0	0	0	0	0	0	0	0	0	0	0	0
A0A287HCW5	Uncharacterized protein OS=Hordeum vulgare subsp. vulgare OX=112509 PE=4 SV=1	High																							A0A287HCW5	0	0	0	0	0	0	0	0	0	0	0	0	0	0	0	0	0	0	0	0	0	0	0	0
A0A287N7L4	Serine hydroxymethyltransferase OS=Hordeum vulgare subsp. vulgare OX=112509 PE=3 SV=1	High					-0.239651	0.291319	1.50142	-0.262331	-0.0895613	-0.209325	0.492705	0.463958	0.543567	-0.970371	-0.130858	-0.382009	1.65562	1.14077	0.506916	0.902186	1.18349	-0.740907	A0A287N7L4	0	0	1	0	0	0	0	0	0	0	0	0	1	0	0	0	0	0	2	1	0	1	1	0
A1E9T2	Ribulose bisphosphate carboxylase large chain OS=Sorghum bicolor OX=4558 GN=rbcL PE=3 SV=1	High	metabolic process		catalytic activity;metal ion binding	Pf00016,Pf02788																			A1E9T2	0	0	0	0	0	0	0	0	0	0	0	0	0	0	0	0	0	0	0	0	0	0	0	0
A0A287QTF6	Ribulose bisphosphate carboxylase small chain OS=Hordeum vulgare subsp. vulgare OX=112509 PE=3 SV=1	High					-0.364217	0.486281	0.969609	-1.36473	-1.10937	-1.31129	-0.117225	-0.052517	0.325758	-1.38684	-0.769882	-1.02375	1.2925	0.953692	-0.238511	0.527057	0.423528	-1.20167	A0A287QTF6	0	0	0	0	0	0	0	0	0	0	0	0	0	0	0	0	0	0	0	0	0	0	0	0
F2D714	Glyceraldehyde-3-phosphate dehydrogenase OS=Hordeum vulgare subsp. vulgare OX=112509 PE=2 SV=1	High	metabolic process		catalytic activity;nucleotide binding	Pf00044,Pf02800	-0.432073	0.33245	1.02439	-0.980872	-0.52978	-0.378559	0.00726392	0.220588	0.362859	-0.908289	-0.122746	-0.191568	1.20774	0.697157	-0.0158859	0.383805	0.656917	-0.996462	F2D714	0	0	0	0	0	0	0	0	0	0	0	0	0	0	0	0	0	0	0	0	0	0	0	0
M0UNI8	Uncharacterized protein OS=Hordeum vulgare subsp. vulgare OX=112509 PE=4 SV=1	High	response to stimulus			Pf05558	0.300468	-0.0170128	-0.112209	1.09727	0.224161	0.671011	0.387636	0.0309576	0.307858	0.679775	-0.148601	0.815599	-0.196773	-0.482208	0.13049	-0.262926	-0.773394	0.561043	M0UNI8	0	0	0	0	0	0	0	0	0	0	0	0	0	0	0	0	0	0	0	0	0	0	0	0
M0W433	Carbonic anhydrase OS=Hordeum vulgare subsp. vulgare OX=112509 PE=3 SV=1	High			catalytic activity;metal ion binding	Pf00484	-0.413082	0.373887	1.18075	-0.903179	-0.279232	-0.492889	0.103299	0.0794007	0.262606	-0.918452	-0.0669432	-0.610995	1.42876	0.732877	0.119259	0.704202	0.997798	-0.754491	M0W433	0	0	0	0	0	0	0	0	0	0	0	0	0	0	0	0	0	0	0	0	0	0	0	0
F2CPQ0	Predicted protein OS=Hordeum vulgare subsp. vulgare OX=112509 PE=2 SV=1	High		nucleus	DNA binding	Pf01429	-0.11217	-0.113427	-0.387064	0.366919	0.303559	0.318921	-0.0952988	-0.0725288	-0.114662	0.407542	0.144841	0.165305	-0.851279	-0.47505	-0.286464	-0.480133	-0.602604	-0.19735	F2CPQ0	0	0	0	0	0	0	0	0	0	0	0	0	0	0	0	0	0	0	0	0	0	0	0	0
F2DQX8	Predicted protein OS=Hordeum vulgare subsp. vulgare OX=112509 PE=2 SV=1	High	metabolic process;transport	membrane	catalytic activity;transporter activity	Pf00213	0.211365	0.244032	0.141539	-0.231334	0.365054	-0.0756495	0.408133	0.504347	0.373512	0.139054	0.394723	-0.000196697	0.140561	0.000723968	0.205573	-0.114312	-0.107079	0.499463	F2DQX8	0	0	0	0	0	0	0	0	0	0	0	0	0	0	0	0	0	0	0	0	0	0	0	0
F2CZ95	Ribulose bisphosphate carboxylase small chain OS=Hordeum vulgare subsp. vulgare OX=112509 PE=2 SV=1	High	metabolic process		catalytic activity	Pf00101,Pf12338	-0.536991	0.566691	1.11005	-1.58346	-1.28299	-1.52393	-0.25229	-0.279067	-0.0940637	-1.46928	-0.688451	-1.23007	1.521	1.10409	0.0357097	0.734435	0.55999	-1.45013	F2CZ95	0	0	0	-1	0	-1	0	0	0	0	0	0	1	0	0	0	0	0	3	2	0	1	2	0
P13564	Glutamine synthetase leaf isozyme, chloroplastic OS=Hordeum vulgare OX=4513 PE=2 SV=2	High	metabolic process		catalytic activity;nucleotide binding	Pf00120,Pf03951	-0.382897	0.683354	1.37627	-1.16105	-0.0352545	-0.58755	0.284794	0.265216	0.474078	-1.24501	0.059119	-0.713328	1.48764	1.14515	-0.00678029	0.716974	0.875342	-0.539114	P13564	0	0	0	0	0	0	0	0	0	0	0	0	0	0	0	0	0	0	0	0	0	0	0	0
F2CWJ3	Glyceraldehyde-3-phosphate dehydrogenase OS=Hordeum vulgare subsp. vulgare OX=112509 PE=2 SV=1	High	metabolic process		catalytic activity;nucleotide binding	Pf00044,Pf02672,Pf02800	-0.646847	0.249059	0.951768	-0.924261	-0.571471	-0.369912	-0.0283483	-0.0404877	0.190009	-1.03261	-0.112131	-0.382635	1.24789	0.65685	0.0278477	0.402872	0.597878	-1.2644	F2CWJ3	0	0	0	0	0	0	0	0	0	0	0	0	0	0	0	0	0	0	0	0	0	0	0	0
F2EJL5	Predicted protein OS=Hordeum vulgare subsp. vulgare OX=112509 PE=2 SV=1	High					0.186337	0.306616	-0.0497352	-0.317391	0.371694	0.0772246	0.349933	0.183079	0.412512	0.0895119	0.536682	0.220755	0.104596	0.225326	0.437121	-0.204663	0.106763	0.637442	F2EJL5	0	0	0	0	0	0	0	0	0	0	0	0	0	0	0	0	0	0	0	0	0	0	0	0
A0A287I5P1	PsbP domain-containing protein OS=Hordeum vulgare subsp. vulgare OX=112509 PE=4 SV=1	High					-0.160348	-0.192842	-0.112918	-0.255587	-0.061792	-0.0930255	0.118507	0.512967	0.218286	-0.0537791	-0.0516687	-0.668202	-0.444793	-0.0664444	-0.310818	-0.441406	-0.680204	-0.693122	A0A287I5P1	0	0	0	0	0	0	0	0	0	0	0	0	0	0	0	0	0	0	0	0	0	0	0	0
A1EA34	Photosystem II CP47 reaction center protein OS=Agrostis stolonifera OX=63632 GN=psbB PE=3 SV=1	High	metabolic process	membrane		Pf00421	-0.297338	0.309836	1.3336	-0.953818	-0.350598	-0.491118	-0.055243	0.120064	0.0287339	-1.05051	-0.04874	-0.912931	1.23975	0.599806	0.202924	0.354247	0.861782	-0.993781	A1EA34	0	0	0	0	0	0	0	0	0	0	0	0	0	0	0	0	0	0	0	0	0	0	0	0
F2ECL6	Predicted protein OS=Hordeum vulgare subsp. vulgare OX=112509 PE=2 SV=1	High	metabolic process;response to stimulus	membrane	antioxidant activity;catalytic activity	Pf00141	-0.313128	-0.274119	0.124793	1.34508	0.672726	1.35867	0.485057	0.641737	0.498905	0.583687	0.405992	0.715817	-0.188534	-0.308139	0.0231046	0.379503	0.240518	0.3115	F2ECL6	0	0	0	0	0	0	0	0	0	0	0	0	0	0	0	0	0	0	0	0	0	0	0	0
F2CVM1	Catalase OS=Hordeum vulgare subsp. vulgare OX=112509 PE=2 SV=1	High	metabolic process;response to stimulus		antioxidant activity;catalytic activity;metal ion binding	Pf00199,Pf06628	-0.125934	0.460221	1.56038	0.124105	0.177759	0.0518039	0.386348	0.590456	0.557719	-0.784412	0.148741	0.10492	1.8167	1.34117	0.960386	0.905676	1.47923	0.0264446	F2CVM1	0	0	1	0	0	0	0	0	0	0	0	0	1	0	0	0	0	0	2	1	0	1	1	0
A1E9V0	Photosystem II CP47 reaction center protein OS=Sorghum bicolor OX=4558 GN=psbB PE=3 SV=1	High	metabolic process	membrane		Pf00421	-0.36712	0.628068	1.43485	-1.22613	-0.969753	-0.883043	-0.250029	0.34392	-0.114245	-1.13144	-0.389662	-1.21593	0.699089	0.679624	-0.152419	0.327494	0.822019	-2.17484	A1E9V0	0	0	0	0	0	0	0	0	0	0	0	0	0	0	0	0	0	-1	1	0	0	1	0	0
S4Z0U7	Photosystem II CP43 reaction center protein OS=Hordeum vulgare subsp. spontaneum OX=77009 GN=psbC PE=3 SV=1	High	metabolic process	membrane	metal ion binding	Pf00421	-0.750752	0.0673839	1.31783	-0.572563	-0.463042	-0.374517	0.124466	0.156982	0.115345	-1.3676	-0.252018	-0.986668	1.48518	0.7989	0.148517	0.516727	1.03835	-1.42811	S4Z0U7	0	0	0	0	0	0	0	0	0	0	0	0	0	0	0	0	0	0	0	0	0	0	0	0
A0A287NGA7	Fructose-bisphosphate aldolase OS=Hordeum vulgare subsp. vulgare OX=112509 PE=3 SV=1	High					-0.554087	0.370308	1.37842	-0.944359	-0.532494	-0.632766	-0.0658567	-0.00444498	0.230661	-1.37314	-0.327907	-0.812593	1.46244	0.945908	0.218365	0.719048	0.983886	-0.907414	A0A287NGA7	0	0	0	0	0	0	0	0	0	0	0	0	0	0	0	0	0	0	0	0	0	0	0	0
F2E555	Predicted protein OS=Hordeum vulgare subsp. vulgare OX=112509 PE=2 SV=1	High			catalytic activity;nucleotide binding	Pf00735,Pf01926,Pf03193,Pf04548,Pf11886	0.00723085	-0.058109	-0.886134	-0.0885894	0.255968	0.00943229	-0.246128	-0.424472	-0.331138	0.163635	0.270825	0.0669898	-0.692082	-0.401073	-0.0192872	-0.185364	-0.332942	-0.0701488	F2E555	0	0	0	0	0	0	0	0	0	0	0	0	0	0	0	0	0	0	0	0	0	0	0	0
M0YGB0	Aminotran_5 domain-containing protein OS=Hordeum vulgare subsp. vulgare OX=112509 PE=3 SV=1	High			catalytic activity	Pf00266	-0.599639	0.45513	1.45597	-0.0841136	-0.454316	-0.305708	0.344631	0.442735	0.526436	-1.23435	-0.301107	-0.562308	2.24928	1.16452	0.580277	0.811372	1.2379	-0.603755	M0YGB0	0	0	0	0	0	0	0	0	0	0	0	0	1	0	0	0	0	0	1	0	0	1	1	0
F2CYA5	Predicted protein OS=Hordeum vulgare subsp. vulgare OX=112509 PE=2 SV=1	High	transport	membrane	transporter activity	Pf00999,Pf02254,Pf05103,Pf05701	-0.186937	-0.520533	-0.862845	0.333408	0.70723	0.534363	0.178062	0.12592	0.136449	0.218187	0.327819	0.0866103	-0.325767	-0.362943	0.135739	-0.46303	-0.651004	-0.216834	F2CYA5	0	0	0	0	0	0	0	0	0	0	0	0	0	0	0	0	0	0	0	0	0	0	0	0
F2E8I0	Predicted protein OS=Hordeum vulgare subsp. vulgare OX=112509 PE=2 SV=1	High				Pf14200	0.581086	0.599917	0.33118	1.66745	0.291058	1.31707	0.828967	0.148045	1.00154	1.61188	0.472754	1.46312	-0.186434	0.141631	0.1359	1.30076	0.581803	1.88381	F2E8I0	0	0	0	1	0	0	0	0	0	1	0	0	0	0	0	0	0	1	3	1	1	1	2	0
A0A287DV95	Uncharacterized protein OS=Hordeum vulgare subsp. vulgare OX=112509 PE=4 SV=1	High					-1.58879	0.173641	-0.121115	-0.913697	-0.301129	-1.21708	-0.1912	0.296449	0.224414	0.132435	0.524057	0.13327	0.89467	2.65984	1.21012	1.59816	1.91115	2.22118	A0A287DV95	0	0	0	0	0	0	0	0	0	0	0	0	0	0	0	0	0	0	0	0	0	0	0	0
M0X9F6	Elongation factor Ts, mitochondrial OS=Hordeum vulgare subsp. vulgare OX=112509 GN=EFTS PE=3 SV=1	High	metabolic process	mitochondrion	protein binding;RNA binding	Pf00575,Pf00627,Pf00889	-0.538881	-0.684248	-0.858151	-0.579629	0.0534817	-0.200079	-0.697322	-0.0967406	-0.889457	-0.699213	0.238875	-0.496972	-0.56354	-0.826731	-0.184735	-0.504286	-0.820346	-1.32175	M0X9F6	0	0	0	0	0	0	0	0	0	0	0	0	0	0	0	0	0	0	0	0	0	0	0	0
M0WMM0	HABP4_PAI-RBP1 domain-containing protein OS=Hordeum vulgare subsp. vulgare OX=112509 PE=4 SV=1	High				Pf04774	-0.221801	-0.0365865	-0.535527	-0.547948	-0.112348	-0.71549	-0.273663	-0.235296	-0.405767	-0.173322	0.16307	-0.711889	-0.39108	-0.198565	0.0778376	-0.693525	-0.40874	-0.225204	M0WMM0	0	0	0	0	0	0	0	0	0	0	0	0	0	0	0	0	0	0	0	0	0	0	0	0
F2EB29	Predicted protein OS=Hordeum vulgare subsp. vulgare OX=112509 PE=2 SV=1	High	metabolic process		catalytic activity;nucleotide binding	Pf00478,Pf00977,Pf01070,Pf01645,Pf03060	-0.437897	0.425916	1.543	-0.687131	-0.508665	-0.168507	0.0206511	0.216091	0.377195	-1.19696	-0.252615	-0.490089	1.4783	1.12519	0.0112353	0.821931	1.29889	-0.698935	F2EB29	0	0	1	0	0	0	0	0	0	0	0	0	0	0	0	0	0	0	1	1	0	0	0	0
A0A287J8S5	Aminomethyltransferase OS=Hordeum vulgare subsp. vulgare OX=112509 PE=3 SV=1	High					-0.0857705	0.355369	1.12929	-0.250108	0.0831105	-0.239423	0.237155	0.104086	0.192758	-1.07859	-0.21127	-0.209391	1.73564	1.18667	0.557282	0.903013	1.08703	-0.219551	A0A287J8S5	0	0	0	0	0	0	0	0	0	0	0	0	1	0	0	0	0	0	1	0	0	1	1	0
A0A287LU91	Uncharacterized protein OS=Hordeum vulgare subsp. vulgare OX=112509 PE=3 SV=1	High					0.520507	0.529238	0.479127	-0.131276	0.163932	-0.0644799	0.481586	0.461061	0.607115	0.44398	0.440589	0.417388	0.138982	0.274108	-0.00829347	-0.149145	0.1126	0.508802	A0A287LU91	0	0	0	0	0	0	0	0	0	0	0	0	0	0	0	0	0	0	0	0	0	0	0	0
F2D5G5	Predicted protein OS=Hordeum vulgare subsp. vulgare OX=112509 PE=2 SV=1	High	cell organization and biogenesis;metabolic process		nucleotide binding;protein binding	Pf00012,Pf06723	1.56513	2.41877	2.81889	-1.21544	-0.111886	-0.53758	0.570567	0.474188	0.624727	-0.246847	0.659879	0.147157	0.820204	0.14857	-0.279901	0.229599	0.516374	-0.808108	F2D5G5	1	1	1	0	0	0	0	0	0	0	0	0	0	0	0	0	0	0	3	3	0	0	1	1
M0XMF8	Ferredoxin OS=Hordeum vulgare subsp. vulgare OX=112509 PE=3 SV=1	High	metabolic process;transport		metal ion binding	Pf00111	0.421753	0.608741	0.472853	-0.435176	0.371478	-0.0753363	0.384505	0.736487	0.484387	0.00988978	0.389154	-0.266955	-0.237172	0.109409	-0.510668	0.145508	0.235146	0.0784119	M0XMF8	0	0	0	0	0	0	0	0	0	0	0	0	0	0	0	0	0	0	0	0	0	0	0	0
A0A287IID6	Uncharacterized protein OS=Hordeum vulgare subsp. vulgare OX=112509 PE=4 SV=1	High					-0.622387	-0.604638	-0.778938	0.261206	0.457334	0.100016	-0.0312327	-0.0415619	-0.00680198	0.285299	0.523755	0.264903	-0.62288	-0.257855	-0.0267067	-0.21644	-0.47277	-0.269167	A0A287IID6	0	0	0	0	0	0	0	0	0	0	0	0	0	0	0	0	0	0	0	0	0	0	0	0
A3RHG5	Dhn4 OS=Hordeum vulgare subsp. vulgare OX=112509 GN=Dhn4 PE=3 SV=1	High	response to stimulus				0.745202	0.745278	0.982028	5.41843	0.895885	4.4106	0.303059	-0.0535093	-0.0594831	1.95013	0.760085	1.11053	0.553316	0.747231	1.27486	2.55941	1.07972	4.34095	A3RHG5	0	0	0	1	0	1	0	0	0	1	0	0	0	0	0	1	0	1	5	2	1	2	3	0
M0Z065	FMN hydroxy acid dehydrogenase domain-containing protein OS=Hordeum vulgare subsp. vulgare OX=112509 PE=3 SV=1	High	metabolic process		catalytic activity;nucleotide binding	Pf00478,Pf00977,Pf01070,Pf01645,Pf03060	0.446967	-0.531596	1.40998	-0.344434	-0.648088	-0.145803	0.614145	0.696507	0.49609	-1.21775	-0.3982	-0.350267	3.82593	2.87393	2.72895	2.09346	2.64007	0.709185	M0Z065	0	0	0	0	0	0	0	0	0	0	0	0	1	1	1	1	1	0	5	0	0	5	2	2
A0A287QT87	Fructose-bisphosphate aldolase OS=Hordeum vulgare subsp. vulgare OX=112509 PE=3 SV=1	High					-0.143267	0.510329	1.42398	-0.837673	-0.27016	-0.694831	0.255789	0.208242	0.222809	-1.26443	-0.373678	-0.810546	1.60674	0.960433	0.28152	0.149551	0.451535	-1.61313	A0A287QT87	0	0	0	0	0	0	0	0	0	0	0	0	1	0	0	0	0	-1	2	0	0	2	1	0
P62162	Calmodulin OS=Hordeum vulgare OX=4513 GN=CAM PE=2 SV=2	High			metal ion binding;protein binding	Pf00036,Pf08726,Pf12763,Pf13202,Pf13405,Pf13499,Pf13833,Pf14658	0.0187842	0.0624929	-0.136102	0.191528	0.221807	0.0294704	-0.0393125	0.233643	-0.116627	0.302542	0.206173	-0.0201426	-0.440211	-0.179573	-0.191871	-0.410703	-0.295614	-0.225985	P62162	0	0	0	0	0	0	0	0	0	0	0	0	0	0	0	0	0	0	0	0	0	0	0	0
F2CS21	Predicted protein OS=Hordeum vulgare subsp. vulgare OX=112509 PE=2 SV=1	High			metal ion binding;protein binding	Pf00036,Pf08726,Pf12763,Pf13202,Pf13405,Pf13499,Pf13833,Pf14658	-0.251215	-0.399667	-0.54345	0.296053	-0.192598	0.106407	-0.376674	-0.386187	-0.598857	0.458561	0.245438	-0.120124	-0.817555	-0.827084	0.0859897	-0.317674	-0.395345	-0.306616	F2CS21	0	0	0	0	0	0	0	0	0	0	0	0	0	0	0	0	0	0	0	0	0	0	0	0
F2CVI3	Predicted protein OS=Hordeum vulgare subsp. vulgare OX=112509 PE=2 SV=1	High	defense response;metabolic process;response to stimulus	cytoplasm	catalytic activity;metal ion binding	Pf00719	-0.0237906	-0.0323802	-0.178372	0.0960138	0.143616	0.15897	0.0238607	-0.105181	0.0652116	-0.0689427	-0.0969616	0.124916	-0.331884	-0.286296	-0.130278	-0.17136	-0.131395	0.421872	F2CVI3	0	0	0	0	0	0	0	0	0	0	0	0	0	0	0	0	0	0	0	0	0	0	0	0
A0A287VF44	Uncharacterized protein OS=Hordeum vulgare subsp. vulgare OX=112509 PE=3 SV=1	High					-0.254056	0.582424	0.716438	-1.0898	-0.668713	-0.931795	-0.547543	-0.226168	-0.575933	-1.5955	0.216023	-0.343948	1.20253	0.890567	0.447469	0.837187	1.45313	0.00285559	A0A287VF44	0	0	0	0	0	0	0	0	0	-1	0	0	0	0	0	0	0	0	1	0	1	0	1	0
A3RHE3	Deyhydrin 4 OS=Hordeum vulgare subsp. vulgare OX=112509 GN=Dhn4 PE=3 SV=1	High	response to stimulus				1.67269	0.4175	0.0287284	0.0591714	-1.29491	-1.63821	1.21382	-0.856915	1.38615	5.28923	0.467029	4.93646	1.38572	1.52623	2.6448	0.158415	0.355745	1.19237	A3RHE3	1	0	0	0	0	-1	0	0	0	1	0	1	0	1	1	0	0	0	6	2	2	2	2	1
A0A287GMU8	Chlorophyll a-b binding protein, chloroplastic OS=Hordeum vulgare subsp. vulgare OX=112509 PE=3 SV=1	High					-0.285295	0.486088	0.862378	-0.981929	-0.702486	-0.439818	-0.146434	-0.33041	0.0922579	-1.57228	-0.839006	-1.04834	1.35999	0.511349	-0.208093	0.0240432	0.346799	-0.802852	A0A287GMU8	0	0	0	0	0	0	0	0	0	0	0	0	0	0	0	0	0	0	0	0	0	0	0	0
M0YA87	Uncharacterized protein OS=Hordeum vulgare subsp. vulgare OX=112509 PE=4 SV=1	High				Pf11493	0.0947109	0.319056	-0.0564716	-1.61255	0.0363135	-1.0155	0.373512	0.189189	0.295472	-0.505198	0.130034	-1.11979	0.415812	0.484139	0.400001	0.133846	-0.0638683	0.545563	M0YA87	0	0	0	-1	0	0	0	0	0	0	0	0	0	0	0	0	0	0	1	1	0	0	1	0
F2CSM9	Predicted protein OS=Hordeum vulgare subsp. vulgare OX=112509 PE=2 SV=1	High	cell organization and biogenesis			Pf10358	-0.24191	-0.552854	-0.874001	0.188532	0.653381	0.467476	0.122731	0.142022	-0.168876	0.0904507	0.463759	-0.0165173	-0.276095	-0.459231	-0.107858	-0.534074	-1.03713	-0.891208	F2CSM9	0	0	0	0	0	0	0	0	0	0	0	0	0	0	0	0	0	0	0	0	0	0	0	0
A0A0S1LGH4	Dehydrin3 OS=Hordeum vulgare subsp. spontaneum OX=77009 GN=Dhn3 PE=3 SV=1	High	response to stimulus				1.47133	1.32153	1.41315	4.29821	-0.768498	3.59189	0.694396	-1.21487	1.23866	5.19124	0.420671	4.87419	1.26272	0.29606	1.70111	3.03913	1.58676	4.90027	A0A0S1LGH4	0	0	0	1	0	1	0	0	0	1	0	1	0	0	1	1	1	1	8	2	2	4	3	1
A0A287M195	FBPase domain-containing protein OS=Hordeum vulgare subsp. vulgare OX=112509 PE=3 SV=1	High					-0.359517	0.315641	1.27909	-0.863033	-0.610348	-0.836826	0.085788	-0.0240221	0.206045	-1.60667	-0.528094	-0.820016	1.46293	0.649141	-0.137628	0.765865	0.983623	-0.928642	A0A287M195	0	0	0	0	0	0	0	0	0	-1	0	0	0	0	0	0	0	0	1	0	1	0	1	0
F2DD14	Predicted protein OS=Hordeum vulgare subsp. vulgare OX=112509 PE=2 SV=1	High			catalytic activity	Pf01370,Pf13460	-0.332724	0.500743	1.38537	-0.874112	-0.596742	-0.906661	0.245378	0.0874283	0.127262	-1.54118	-0.202591	-0.932048	1.42243	0.866354	0.518856	0.415842	0.850883	-1.09633	F2DD14	0	0	0	0	0	0	0	0	0	-1	0	0	0	0	0	0	0	0	1	0	1	0	1	0
A0A287VDK5	Ferredoxin--NADP reductase, chloroplastic OS=Hordeum vulgare subsp. vulgare OX=112509 PE=3 SV=1	High					-0.345832	0.358013	1.65013	-1.35954	-0.197215	-0.854864	0.315405	0.268446	0.293818	-1.08221	-0.0242484	-0.670044	1.70101	0.645676	0.249857	0.511002	0.584549	-1.46582	A0A287VDK5	0	0	1	0	0	0	0	0	0	0	0	0	1	0	0	0	0	0	2	1	0	1	1	0
F2CR16	Fructose-bisphosphate aldolase OS=Hordeum vulgare subsp. vulgare OX=112509 PE=2 SV=1	High	metabolic process		catalytic activity	Pf00274	-0.271155	0.527826	1.03436	-0.883454	-0.232047	-0.677632	0.1213	0.310715	0.314756	-1.0084	-0.117178	-0.59575	1.64011	0.776858	0.460794	0.633123	0.861489	-0.666307	F2CR16	0	0	0	0	0	0	0	0	0	0	0	0	1	0	0	0	0	0	1	0	0	1	1	0
A0A218LNI3	Photosystem II D2 protein OS=Hordeum vulgare OX=4513 GN=psbD PE=3 SV=1	High	metabolic process;transport	membrane	catalytic activity;metal ion binding	Pf00124	-0.45988	0.29498	1.26526	-1.06459	-0.584741	-0.686498	-0.0730511	-0.0917471	0.0483645	-1.14825	-0.288821	-1.24892	1.14568	0.5543	-0.17574	0.0830581	0.544497	-2.1388	A0A218LNI3	0	0	0	0	0	0	0	0	0	0	0	0	0	0	0	0	0	-1	1	0	0	1	0	0
A0A287PA65	Uncharacterized protein OS=Hordeum vulgare subsp. vulgare OX=112509 PE=4 SV=1	High					0.241665	0.450822	0.137294	-0.51942	0.0433618	-0.484979	0.176609	-0.0852295	0.163025	0.211397	0.250999	-0.0176444	0.00604446	0.310132	0.475251	-0.131349	0.0719029	0.522551	A0A287PA65	0	0	0	0	0	0	0	0	0	0	0	0	0	0	0	0	0	0	0	0	0	0	0	0
M0YZ71	HABP4_PAI-RBP1 domain-containing protein OS=Hordeum vulgare subsp. vulgare OX=112509 PE=4 SV=1	High				Pf04774	0.259201	0.96034	-0.0122912	-0.778323	-0.0936501	-1.75068	0.209375	0.426831	0.368136	0.437878	0.393019	-0.0363057	0.0639574	0.819539	0.760359	0.445994	-0.0406914	0.741696	M0YZ71	0	0	0	0	0	-1	0	0	0	0	0	0	0	0	0	0	0	0	1	1	0	0	0	0
M0YPY5	Ferredoxin--NADP reductase, chloroplastic OS=Hordeum vulgare subsp. vulgare OX=112509 PE=3 SV=1	High	metabolic process		catalytic activity	Pf00175,Pf00667,Pf00970	-0.165432	0.367205	1.27862	-0.469197	-0.457498	-0.472196	0.146555	0.518351	0.261301	-1.35673	-0.150278	-0.720602	1.76103	1.3665	0.748471	0.682133	1.07544	-0.782698	M0YPY5	0	0	0	0	0	0	0	0	0	0	0	0	1	0	0	0	0	0	1	0	0	1	1	0
F2E9F1	Chlorophyll a-b binding protein, chloroplastic OS=Hordeum vulgare subsp. vulgare OX=112509 PE=2 SV=1	High	metabolic process	membrane		Pf00504	-0.509227	0.447704	1.4351	-0.79556	-0.765846	-0.331432	-0.0193281	-0.12239	0.266562	-1.37976	-0.542433	-0.905147	1.24299	1.01469	-0.0961185	0.349877	0.678512	-0.920135	F2E9F1	0	0	0	0	0	0	0	0	0	0	0	0	0	0	0	0	0	0	0	0	0	0	0	0
A0A287SNX7	Chlorophyll a-b binding protein, chloroplastic OS=Hordeum vulgare subsp. vulgare OX=112509 PE=3 SV=1	High					0.214407	-0.130729	1.89707	-0.95347	-1.55886	-0.553973	-0.17373	-0.351744	-0.389384	-2.18384	-1.01629	-1.68517	1.85275	1.18059	0.600615	0.429302	0.339278	-1.42083	A0A287SNX7	0	0	1	0	-1	0	0	0	0	-1	0	-1	1	0	0	0	0	0	5	2	2	1	2	1
A0A287HWS1	Uncharacterized protein OS=Hordeum vulgare subsp. vulgare OX=112509 PE=3 SV=1	High					-0.510014	0.283758	1.58765	-1.08379	-0.241933	-0.683061	0.346897	0.255739	0.432637	-1.09947	-0.0093286	-0.360025	1.93072	1.21607	0.68665	0.644445	1.03024	-0.709515	A0A287HWS1	0	0	1	0	0	0	0	0	0	0	0	0	1	0	0	0	0	0	2	1	0	1	1	0
A0A287T1H4	Uncharacterized protein OS=Hordeum vulgare subsp. vulgare OX=112509 PE=4 SV=1	High					0.0432083	-0.241528	-0.0446132	1.40876	0.646232	1.77468	0.572204	0.390372	0.560733	0.802509	0.0770244	1.31724	-0.205802	-0.367665	-0.00708139	-0.673112	-0.667975	0.589498	A0A287T1H4	0	0	0	0	0	1	0	0	0	0	0	0	0	0	0	0	0	0	1	1	0	0	0	0
F2CTY2	Predicted protein OS=Hordeum vulgare subsp. vulgare OX=112509 PE=2 SV=1	High	metabolic process;response to stimulus	extracellular	catalytic activity	Pf00316	-0.146909	0.426844	1.21802	-0.612563	-0.067355	-0.400068	0.286151	0.259157	0.292715	-0.909902	0.0486364	-0.387022	1.64685	1.15558	0.480039	0.705651	0.987049	-0.425976	F2CTY2	0	0	0	0	0	0	0	0	0	0	0	0	1	0	0	0	0	0	1	0	0	1	1	0
M0VMI2	Uncharacterized protein OS=Hordeum vulgare subsp. vulgare OX=112509 PE=3 SV=1	High			metal ion binding;protein binding	Pf00036,Pf08726,Pf12763,Pf13202,Pf13405,Pf13499,Pf13833																			M0VMI2	0	0	0	0	0	0	0	0	0	0	0	0	0	0	0	0	0	0	0	0	0	0	0	0
F2E8P3	Predicted protein OS=Hordeum vulgare subsp. vulgare OX=112509 PE=2 SV=1	High	metabolic process		catalytic activity;nucleotide binding	Pf00406,Pf05191,Pf10236,Pf13207	-0.523251	0.232548	1.10634	-0.963475	-0.789786	-1.15874	-0.207722	0.0733214	-0.121831	-0.918979	-0.455832	-1.32679	0.791063	0.414436	-0.345882	0.754956	0.727539	-1.12976	F2E8P3	0	0	0	0	0	0	0	0	0	0	0	0	0	0	0	0	0	0	0	0	0	0	0	0
F2D6Q1	Chlorophyll a-b binding protein, chloroplastic OS=Hordeum vulgare subsp. vulgare OX=112509 PE=2 SV=1	High	metabolic process	membrane		Pf00504																			F2D6Q1	0	0	0	0	0	0	0	0	0	0	0	0	0	0	0	0	0	0	0	0	0	0	0	0
A1E9R0	Photosystem II CP43 reaction center protein OS=Sorghum bicolor OX=4558 GN=psbC PE=3 SV=1	High	metabolic process	membrane	metal ion binding	Pf00421	0.810257		-0.0645199	-0.458116	0.417306	0.0629521	0.292599	0.190501	0.571853	0.273684	0.67357	0.343733	-0.446691	-0.861596	-0.935169			0.475818	A1E9R0	0	0	0	0	0	0	0	0	0	0	0	0	0	0	0	0	0	0	0	0	0	0	0	0
A0A287HT99	MI domain-containing protein OS=Hordeum vulgare subsp. vulgare OX=112509 PE=4 SV=1	High					0.285785	0.22544	-0.0958169	0.869466	0.612808	0.412436	0.142964	-0.309143	0.142968	1.01572	0.391405	0.956472	-0.196681	0.0553003	-0.0846389	-0.0894786	-0.634208	0.126565	A0A287HT99	0	0	0	0	0	0	0	0	0	0	0	0	0	0	0	0	0	0	0	0	0	0	0	0
A0A287GMX5	Chlorophyll a-b binding protein, chloroplastic OS=Hordeum vulgare subsp. vulgare OX=112509 PE=3 SV=1	High					-0.168013	0.285365	1.47865	-0.427638	-0.833454	-0.43797	-0.0340713	0.106611	0.0463665	-1.38427	-0.482627	-0.901656	1.56129	0.842718	0.512713	0.806681	0.758383	-1.17187	A0A287GMX5	0	0	0	0	0	0	0	0	0	0	0	0	1	0	0	0	0	0	1	0	0	1	1	0
F2CYZ1	Glycine cleavage system H protein OS=Hordeum vulgare subsp. vulgare OX=112509 PE=2 SV=1	High	metabolic process	mitochondrion		Pf01597	-0.126776	-0.0454665	-0.220319	-0.450575	0.0638963	-0.256749	0.0135114	0.234183	0.108834	0.0713441	0.208448	-0.234991	-0.396944	-0.0397411	-0.135396	-0.274559	-0.356837	-0.416748	F2CYZ1	0	0	0	0	0	0	0	0	0	0	0	0	0	0	0	0	0	0	0	0	0	0	0	0
F2DDU3	Predicted protein OS=Hordeum vulgare subsp. vulgare OX=112509 PE=2 SV=1	High	metabolic process;regulation of biological process	cytoplasm	metal ion binding;nucleotide binding	Pf00166	0.0649308	0.229663	-0.350559	-0.424827	-0.0471082	-0.218102	-0.399647	-0.03279	-0.202417	-0.082401	0.557015	0.0914328	-0.72111	-0.0770088	0.0358302	-0.0228709	0.118133	0.35956	F2DDU3	0	0	0	0	0	0	0	0	0	0	0	0	0	0	0	0	0	0	0	0	0	0	0	0
M0X0F4	Chlorophyll a-b binding protein, chloroplastic OS=Hordeum vulgare subsp. vulgare OX=112509 PE=3 SV=1	High	metabolic process	membrane		Pf00504																			M0X0F4	0	0	0	0	0	0	0	0	0	0	0	0	0	0	0	0	0	0	0	0	0	0	0	0
A0A287TFZ0	Chlorophyll a-b binding protein, chloroplastic OS=Hordeum vulgare subsp. vulgare OX=112509 PE=3 SV=1	High					-1.20591	-0.313417	0.867118	-0.47579	-1.29303	-0.752105	-0.0769951	0.0610585	0.188849	-1.5887	-0.558425	-0.773571	0.991668	0.0785704	-0.251073	-0.196142	-0.00102877	-1.16076	A0A287TFZ0	0	0	0	0	0	0	0	0	0	-1	0	0	0	0	0	0	0	0	1	0	1	0	1	0
F2D6B1	Predicted protein OS=Hordeum vulgare subsp. vulgare OX=112509 PE=2 SV=1	High	metabolic process;response to stimulus		antioxidant activity;catalytic activity;protein binding	Pf02798,Pf13409,Pf13410,Pf13417	0.309573	0.485329	0.157386	0.544307	-0.140302	0.0588008	0.190797	0.109358	0.337264	0.872814	0.284673	1.03406	-0.113189	0.284374	0.285163	0.141238	0.0452976	0.585212	F2D6B1	0	0	0	0	0	0	0	0	0	0	0	0	0	0	0	0	0	0	0	0	0	0	0	0
A0A287IQT8	Uncharacterized protein OS=Hordeum vulgare subsp. vulgare OX=112509 PE=4 SV=1	High					-0.400403	0.431657	1.1615	-0.324405	-0.598824	-0.413603	0.422036	0.395631	0.346234	-1.21611	-0.441968	-0.612106	1.64454	1.07604	0.65658	0.73347	1.10171	-0.320526	A0A287IQT8	0	0	0	0	0	0	0	0	0	0	0	0	1	0	0	0	0	0	1	0	0	1	1	0
F2D4W3	Predicted protein OS=Hordeum vulgare subsp. vulgare OX=112509 PE=2 SV=1	High	metabolic process		catalytic activity;metal ion binding	Pf00113,Pf03952	-0.449554	0.845154	1.33023	0.284942	0.106765	0.155739	0.68114	0.883143	0.561081	-0.826952	-0.319179	0.215038	1.7979	1.34943	0.378369	0.844524	0.633772	0.516062	F2D4W3	0	0	0	0	0	0	0	0	0	0	0	0	1	0	0	0	0	0	1	0	0	1	1	0
A0A287S128	Chlorophyll a-b binding protein, chloroplastic OS=Hordeum vulgare subsp. vulgare OX=112509 PE=3 SV=1	High					-0.927061	0.307856	1.41351	-1.01903	-0.679871	-1.0383	0.180732	0.158227	0.223646	-1.95933	-0.581137	-1.18599	1.46154	0.845936	0.071378	0.4331	0.529483	-1.33695	A0A287S128	0	0	0	0	0	0	0	0	0	-1	0	0	0	0	0	0	0	0	1	0	1	0	1	0
M0W5R5	Chlorophyll a-b binding protein, chloroplastic OS=Hordeum vulgare subsp. vulgare OX=112509 PE=3 SV=1	High	metabolic process	membrane		Pf00504																			M0W5R5	0	0	0	0	0	0	0	0	0	0	0	0	0	0	0	0	0	0	0	0	0	0	0	0
F2E4C2	Predicted protein OS=Hordeum vulgare subsp. vulgare OX=112509 PE=2 SV=1	High	cell organization and biogenesis		nucleotide binding	Pf00012,Pf06723	-0.635256	-0.144931	0.29297	1.30664	-0.24047	1.53735	-1.2416	-0.617114	-0.446304	-0.210611	-1.00873	1.85307	-0.7286		1.24451	0.985011	-0.0746025	1.84501	F2E4C2	0	0	0	0	0	1	0	0	0	0	0	1	0	0	0	0	0	1	3	1	1	1	0	0
F2CRH2	Elongation factor 1-alpha OS=Hordeum vulgare subsp. vulgare OX=112509 PE=2 SV=1	High	metabolic process	cytoplasm	catalytic activity;nucleotide binding;RNA binding	Pf00009,Pf03143,Pf03144	-0.0246052	0.214522	0.907408	-0.248755	-0.443149	-0.170609	-0.00438232	0.159642	0.205387	-0.644907	-0.102735	0.26349	0.925719	0.265879	-0.0858667	0.765095	0.766531	-0.104089	F2CRH2	0	0	0	0	0	0	0	0	0	0	0	0	0	0	0	0	0	0	0	0	0	0	0	0
M0XC72	Chlorophyll a-b binding protein, chloroplastic OS=Hordeum vulgare subsp. vulgare OX=112509 PE=3 SV=1	High	metabolic process	membrane		Pf00504																			M0XC72	0	0	0	0	0	0	0	0	0	0	0	0	0	0	0	0	0	0	0	0	0	0	0	0
F2CTY1	Chlorophyll a-b binding protein, chloroplastic OS=Hordeum vulgare subsp. vulgare OX=112509 PE=2 SV=1	High	metabolic process	membrane		Pf00504	-0.281441	-0.362112	0.854476	0.0209344	-0.555711	0.409679	-0.0140579	0.0552725	-0.0196009	-1.7141	-1.04538	-1.34633	1.14814	1.15252	0.665093	-0.351823	-0.0939563	-1.89965	F2CTY1	0	0	0	0	0	0	0	0	0	-1	0	0	0	0	0	0	0	-1	2	0	1	1	1	0
A0A287WM51	Chlorophyll a-b binding protein, chloroplastic OS=Hordeum vulgare subsp. vulgare OX=112509 PE=3 SV=1	High					-0.235611	0.373409	1.70483	-0.326322	0.214389	0.187555	-0.154964	0.0985044	0.264355	-0.984054	-0.472627	-0.971965	1.01818	0.893749	-0.758439	0.0164081	0.368618	-1.04464	A0A287WM51	0	0	0	0	0	0	0	0	0	0	0	0	0	0	0	0	0	0	0	0	0	0	0	0
A0A287LYZ7	Uncharacterized protein OS=Hordeum vulgare subsp. vulgare OX=112509 PE=4 SV=1	High					-0.322795	0.540213	1.58608	-0.262972	-0.264748	0.184782	-0.00895234	0.0110257	0.281041	-0.910723	-0.403428	-0.388766	1.21307	0.753326	-0.199858	0.41375	0.715836	-1.01899	A0A287LYZ7	0	0	0	0	0	0	0	0	0	0	0	0	0	0	0	0	0	0	0	0	0	0	0	0
A0A287L8S5	Uncharacterized protein OS=Hordeum vulgare subsp. vulgare OX=112509 PE=3 SV=1	High					0.231662	0.0294185	-0.315884	-0.160325	-0.131386	-0.672449	0.212404	0.0126911	-0.234965	0.276741	0.268347	-0.266799	0.135592	-0.472872	0.406541	0.22818	0.0180993	0.502425	A0A287L8S5	0	0	0	0	0	0	0	0	0	0	0	0	0	0	0	0	0	0	0	0	0	0	0	0
F2E5U7	Dihydrolipoyl dehydrogenase OS=Hordeum vulgare subsp. vulgare OX=112509 PE=2 SV=1	High	cellular homeostasis;metabolic process;regulation of biological process		catalytic activity;nucleotide binding	Pf00070,Pf02852,Pf07992	-0.186543	0.451739	0.811495	0.661577	0.285771	0.749406	0.482992	0.438925	0.320964	-1.07734	-0.534239	-0.0331702	2.88653	1.17372	1.37215	0.703736	0.767958	-0.509269	F2E5U7	0	0	0	0	0	0	0	0	0	0	0	0	1	0	0	0	0	0	1	0	0	1	1	0
A0A287GYR4	Uncharacterized protein OS=Hordeum vulgare subsp. vulgare OX=112509 PE=4 SV=1	High					-0.155856	0.130976	-0.988447	-2.35431	-0.0799503	-2.15712	-0.673652	-0.351121	-0.893685	-1.50824	0.00946441	-1.51034	-0.792248	-0.404761	-0.661725	-0.680529	-0.412498	-0.409369	A0A287GYR4	0	0	0	-1	0	-1	0	0	0	-1	0	-1	0	0	0	0	0	0	4	2	2	0	2	0
F2DBE3	Catalase OS=Hordeum vulgare subsp. vulgare OX=112509 PE=2 SV=1	High	metabolic process;response to stimulus		antioxidant activity;catalytic activity;metal ion binding	Pf00199,Pf06628	-2.13475	-1.69884	-0.924414	2.66841	0.319517	2.63371	0.22467	-0.265179	0.742165	-0.406634	0.243535	1.70216	0.614624	0.94913	1.14689	0.942295	-0.206495	1.49634	F2DBE3	-1	-1	0	1	0	1	0	0	0	0	0	1	0	0	0	0	0	0	5	4	1	0	2	1
M0WP44	GrpE protein homolog OS=Hordeum vulgare subsp. vulgare OX=112509 PE=3 SV=1	High	metabolic process;regulation of biological process	mitochondrion;organelle lumen	enzyme regulator activity;nucleotide binding;protein binding	Pf01025	-0.55293	-0.564486	-1.0005	0.812497	0.539223	1.06113	-0.740993	-0.777524	-0.840789	-0.0674081	0.0311715	-0.273674	-0.39898	0.0449389	0.886769	-0.222767	-0.10572	-0.255321	M0WP44	0	0	0	0	0	0	0	0	0	0	0	0	0	0	0	0	0	0	0	0	0	0	0	0
F2D884	Predicted protein OS=Hordeum vulgare subsp. vulgare OX=112509 PE=2 SV=1	High	cell organization and biogenesis		nucleotide binding	Pf00012,Pf06723	1.02134	0.428465	0.540549	-0.105533	1.55044	1.02712	0.2375	0.426873	0.109143	-1.98022	-1.13777	-0.738664	1.54433	0.93314	0.694944				F2D884	0	0	0	0	1	0	0	0	0	-1	0	0	1	0	0	0	0	0	3	1	1	1	2	1
A0A166ZI85	Ribulose bisphosphate carboxylase large chain (Fragment) OS=Hordeum vulgare OX=4513 GN=rbcL PE=3 SV=1	High	metabolic process		catalytic activity;metal ion binding	Pf00016,Pf02788																			A0A166ZI85	0	0	0	0	0	0	0	0	0	0	0	0	0	0	0	0	0	0	0	0	0	0	0	0
A0A287SGQ2	Malate dehydrogenase OS=Hordeum vulgare subsp. vulgare OX=112509 PE=3 SV=1	High					-0.137545	0.157009	1.58994	-0.0532893	0.105918	-0.43765	0.398333	0.590814	0.485565	-1.08007	0.0869398	-0.514651	2.20427	1.62302	0.768795	0.867335	0.978956	-0.660058	A0A287SGQ2	0	0	1	0	0	0	0	0	0	0	0	0	1	1	0	0	0	0	3	1	0	2	1	1
A0A287FFF9	Uncharacterized protein OS=Hordeum vulgare subsp. vulgare OX=112509 PE=3 SV=1	High																							A0A287FFF9	0	0	0	0	0	0	0	0	0	0	0	0	0	0	0	0	0	0	0	0	0	0	0	0
P13194	Photosystem I reaction center subunit IV, chloroplastic OS=Hordeum vulgare OX=4513 GN=PSAE PE=1 SV=2	High	metabolic process	membrane		Pf02427	1.60045	1.27367	0.870719	0.415941	-0.177539	0.952695	0.0799133	0.174124	0.53973	0.312714	0.116243	0.438795	0.396785	0.0976606	0.114038	-0.0431109	-0.203611	1.02532	P13194	1	0	0	0	0	0	0	0	0	0	0	0	0	0	0	0	0	0	1	1	0	0	1	0
A0A287WX12	Glyceraldehyde-3-phosphate dehydrogenase OS=Hordeum vulgare subsp. vulgare OX=112509 PE=3 SV=1	High					-1.18773	0.342332	1.54742	0.929643	0.142738	0.191137	0.697593	0.506816	0.493789	-0.139495	0.379894	0.571473	1.68808	1.16751	0.928182	1.87773	1.99975	0.984253	A0A287WX12	0	0	1	0	0	0	0	0	0	0	0	0	1	0	0	1	1	0	4	1	0	3	2	1
A0A287SV31	Tr-type G domain-containing protein OS=Hordeum vulgare subsp. vulgare OX=112509 PE=4 SV=1	High					-0.161166	0.5313	1.25374	-0.495551	-1.00227	-1.0776	-0.031895	-0.0323679	0.109485	-1.24365	-0.357959	0.272914	1.99106	1.2044	0.0480112	1.57767	0.938695	0.89457	A0A287SV31	0	0	0	0	0	0	0	0	0	0	0	0	1	0	0	1	0	0	2	0	0	2	2	0
A0A287I3X4	Uncharacterized protein OS=Hordeum vulgare subsp. vulgare OX=112509 PE=4 SV=1	High					-0.603234	-0.429751	-0.271324	0.0836389	0.543781	0.66413	-0.326823	0.296399	-0.214596	0.225211	0.198147	0.232367	-1.31495	-0.431454	-0.904299	-0.72672	-0.897129	-1.30374	A0A287I3X4	0	0	0	0	0	0	0	0	0	0	0	0	0	0	0	0	0	0	0	0	0	0	0	0
A0A287LZV7	FBPase domain-containing protein OS=Hordeum vulgare subsp. vulgare OX=112509 PE=3 SV=1	High					-0.212599	0.190519	0.795822	0.34984	-0.463993	-0.545388	0.41839	0.15744	0.2091	-1.00194	-0.198488	-0.489725	1.80891	1.10639	0.701019	0.358298	0.273855	-0.553734	A0A287LZV7	0	0	0	0	0	0	0	0	0	0	0	0	1	0	0	0	0	0	1	0	0	1	1	0
A0A287IXV3	Elongation factor G, chloroplastic OS=Hordeum vulgare subsp. vulgare OX=112509 PE=3 SV=1	High					-0.276483	0.486534	1.10724	-0.491155	-0.599084	-1.14303	0.269236	0.553494	-0.260813	-2.94632	-0.789599	-1.34318	2.13907	1.49061	0.765322	1.51589	1.66768	0.30395	A0A287IXV3	0	0	0	0	0	0	0	0	0	-1	0	0	1	0	0	1	1	0	4	0	1	3	3	1
Q43478	ES2A protein OS=Hordeum vulgare OX=4513 GN=ES2A PE=2 SV=1	High					0.264798	0.273488	0.183207	0.309462	-0.208983	0.184308	0.423987	-0.0974634	-0.0134478	0.583115	-0.0513253	-0.0149981	0.712093	0.516588	0.81794	0.615366	0.049647	0.717087	Q43478	0	0	0	0	0	0	0	0	0	0	0	0	0	0	0	0	0	0	0	0	0	0	0	0
A0A287NBZ8	Chlorophyll a-b binding protein, chloroplastic OS=Hordeum vulgare subsp. vulgare OX=112509 PE=3 SV=1	High					-0.41311	-0.0246486	1.31185	-0.838113	-0.644088	-0.757546	-0.230042	0.0301283	-0.121379	-1.6898	-0.779551	-1.27619	1.3252	1.00335	0.0848634	0.416699	0.458576	-1.89212	A0A287NBZ8	0	0	0	0	0	0	0	0	0	-1	0	0	0	0	0	0	0	-1	2	0	1	1	1	0
F2CU34	Predicted protein OS=Hordeum vulgare subsp. vulgare OX=112509 PE=2 SV=1	High	metabolic process;response to stimulus		nucleotide binding;protein binding	Pf00183,Pf02518,Pf13589	-0.353093	0.277776	1.14112	0.532351	0.276517	0.168726	-0.00537302	0.24353	0.427874	-0.803947	-0.00714044	0.449114	0.937625	0.583833	0.0516022	0.622902	0.977204	0.290462	F2CU34	0	0	0	0	0	0	0	0	0	0	0	0	0	0	0	0	0	0	0	0	0	0	0	0
M0WUN8	Thioredoxin domain-containing protein OS=Hordeum vulgare subsp. vulgare OX=112509 PE=4 SV=1	High	cellular homeostasis;metabolic process;regulation of biological process		catalytic activity	Pf00085,Pf13098,Pf13905,Pf14595	-0.872718	-0.663292	-0.477736	-0.318989	-0.0117994	-0.353953	-0.151511	-0.0909978	-0.273913	-0.330881	-0.375196	-0.729729	-0.838267	-0.197713	-0.00797201	-0.786955	-0.714069	-1.21801	M0WUN8	0	0	0	0	0	0	0	0	0	0	0	0	0	0	0	0	0	0	0	0	0	0	0	0
F2CUG7	Predicted protein OS=Hordeum vulgare subsp. vulgare OX=112509 PE=2 SV=1	High	metabolic process;transport	membrane	transporter activity	Pf00430	0.661134	1.0817	1.42545	-0.409475	0.146325	-0.175654	0.589884	0.288739	0.348801	-0.209103	-0.00935235	0.094522	0.967326	-0.386952	-0.0788001	0.119193	0.514994	0.354458	F2CUG7	0	0	0	0	0	0	0	0	0	0	0	0	0	0	0	0	0	0	0	0	0	0	0	0
A0A287UID7	PRK domain-containing protein OS=Hordeum vulgare subsp. vulgare OX=112509 PE=4 SV=1	High					-0.471306	0.373798	0.236027	0.601777	-1.64469	-0.0076663	-0.140509	-0.455997	-1.05952	-0.709152	-0.763364	-0.838067	-0.0657914	-0.80945	0.36467	0.499292	0.770149	-2.07633	A0A287UID7	0	0	0	0	-1	0	0	0	0	0	0	0	0	0	0	0	0	-1	2	1	0	1	0	1
F2DJM5	Predicted protein OS=Hordeum vulgare subsp. vulgare OX=112509 PE=2 SV=1	High	regulation of biological process		DNA binding;metal ion binding	Pf00098,Pf00313,Pf08206	0.210826	-0.00575392	0.0534228	0.39962	-0.0688214	0.245816	-0.100704	0.0198075	0.134855	0.731763	0.00899659	0.725487	-0.637715	-0.265782	-0.29932	-0.264617	-0.888972	-0.0942915	F2DJM5	0	0	0	0	0	0	0	0	0	0	0	0	0	0	0	0	0	0	0	0	0	0	0	0
A0A287NN35	ATPase_AAA_core domain-containing protein OS=Hordeum vulgare subsp. vulgare OX=112509 PE=4 SV=1	High					-0.959002	0.337695	0.98339	-0.757047	-0.337087	-0.75626	-0.26033	0.37452	-0.550985	-1.39622	-0.0887623	-1.34675	-0.0179499	-1.21645	-0.789663	-0.0249851	1.66812	0.916516	A0A287NN35	0	0	0	0	0	0	0	0	0	0	0	0	0	0	0	0	1	0	1	0	0	1	0	1
A0A287NC59	Rieske domain-containing protein OS=Hordeum vulgare subsp. vulgare OX=112509 PE=4 SV=1	High					-0.664183	-0.392355	-0.43494	-0.0571269	0.617742	0.496479	-0.35042	-0.246033	-0.364021	0.0895806	-0.0583137	0.288486	-0.275586	-0.681893	-0.408338	-0.506063	-0.431783	-0.811783	A0A287NC59	0	0	0	0	0	0	0	0	0	0	0	0	0	0	0	0	0	0	0	0	0	0	0	0
F2DIN7	Predicted protein OS=Hordeum vulgare subsp. vulgare OX=112509 PE=2 SV=1	High		mitochondrion	catalytic activity;transporter activity	Pf02297	0.0709595	0.303078	0.0439823	0.417278	0.421371	0.326994	-0.0105505	-0.0290267	0.0840797	0.797285	0.632721	0.586484	-0.836973	-0.558878	-0.27062	-0.293637	-0.0978754	-0.0275433	F2DIN7	0	0	0	0	0	0	0	0	0	0	0	0	0	0	0	0	0	0	0	0	0	0	0	0
F2CWL9	Chlorophyll a-b binding protein, chloroplastic OS=Hordeum vulgare subsp. vulgare OX=112509 PE=2 SV=1	High	metabolic process	membrane		Pf00504																			F2CWL9	0	0	0	0	0	0	0	0	0	0	0	0	0	0	0	0	0	0	0	0	0	0	0	0
F2E3N1	Lipoxygenase OS=Hordeum vulgare subsp. vulgare OX=112509 PE=2 SV=1	High	metabolic process		catalytic activity;metal ion binding;protein binding	Pf00305,Pf01477	-0.149818	0.596673	1.44113	-2.47404	-0.339802	-1.49644	0.455874	0.797308	0.0114156	-1.26743	0.29157	-1.07005	1.96787	0.604127	0.655084	1.0597	1.95437	0.947787	F2E3N1	0	0	0	-1	0	0	0	0	0	0	0	0	1	0	0	0	1	0	3	1	0	2	2	1
A0A287SS50	Uncharacterized protein OS=Hordeum vulgare subsp. vulgare OX=112509 PE=3 SV=1	High					0.0803115	-0.461599	-0.193568	0.390193	-0.537599	0.0853798	-0.399594	-0.0442926	-1.03955	-0.0578451	-0.606957	-0.834405	0.276605	-0.863573	0.132888	0.0593235	-0.229092	-1.27977	A0A287SS50	0	0	0	0	0	0	0	0	0	0	0	0	0	0	0	0	0	0	0	0	0	0	0	0
A0A287N407	Uncharacterized protein OS=Hordeum vulgare subsp. vulgare OX=112509 PE=3 SV=1	High																							A0A287N407	0	0	0	0	0	0	0	0	0	0	0	0	0	0	0	0	0	0	0	0	0	0	0	0
A0A287WZM0	Ferredoxin OS=Hordeum vulgare subsp. vulgare OX=112509 PE=3 SV=1	High					-0.789366	-0.144842	0.0284743	-0.0652189	0.24082	-0.30932	-0.0960296	0.464001	-0.0336142	-0.182982	-0.155928	-0.655111	-0.583071	-0.251995	-0.334742	-0.413175	-0.299787	-0.338355	A0A287WZM0	0	0	0	0	0	0	0	0	0	0	0	0	0	0	0	0	0	0	0	0	0	0	0	0
F2E8Y8	Predicted protein OS=Hordeum vulgare subsp. vulgare OX=112509 PE=2 SV=1	High					0.705323	0.791497	0.585183	1.9277	1.0432	1.35271	0.487224	0.165101	0.644135	1.32104	1.0171	1.30297	0.614588	0.0873451	0.98653	0.574323	0.32412	1.57212	F2E8Y8	0	0	0	1	0	0	0	0	0	0	0	0	0	0	0	0	0	1	2	1	0	1	1	0
F2DNM8	Predicted protein OS=Hordeum vulgare subsp. vulgare OX=112509 PE=2 SV=1	High				Pf04774	0.030045	0.179283	-0.303251	-0.19855	0.0102942	-0.637444	-0.220071	-0.570194	-0.411115	-0.074769	-0.181884	-0.159944	-0.569104	-0.310003	0.436863	-0.105424	-0.0919784	0.523546	F2DNM8	0	0	0	0	0	0	0	0	0	0	0	0	0	0	0	0	0	0	0	0	0	0	0	0
A0A287HLL3	Uncharacterized protein OS=Hordeum vulgare subsp. vulgare OX=112509 PE=4 SV=1	High					-0.212068	-0.046751	-0.139172	-1.87846	0.0528332	-0.878062	0.0802819	0.272677	0.191997	-1.06836	-0.138411	-1.21383	-0.240829	0.00347264	-0.0997409	-0.661802	-0.296109	-0.827911	A0A287HLL3	0	0	0	-1	0	0	0	0	0	0	0	0	0	0	0	0	0	0	1	1	0	0	1	0
A0A287K7P8	Cysteine synthase OS=Hordeum vulgare subsp. vulgare OX=112509 PE=3 SV=1	High					0.0114331	0.387439	1.36586	-0.784372	-0.0305909	-1.00569	0.310205	0.384617	0.248011	-1.19284	0.132392	-0.452393	2.44758	2.06694	0.76733	1.00429	1.22443	-0.340486	A0A287K7P8	0	0	0	0	0	0	0	0	0	0	0	0	1	1	0	0	0	0	2	0	0	2	1	1
F2EHF8	Predicted protein OS=Hordeum vulgare subsp. vulgare OX=112509 PE=2 SV=1	High	metabolic process;response to stimulus	cytosol;extracellular;membrane;mitochondrion;vacuole	catalytic activity;metal ion binding	Pf00121	-0.563956	0.149137	1.02953	0.197925	-0.266274	-0.350496	0.219779	0.142753	0.0217448	-1.37762	-0.346453	-0.461123	1.58351	0.838328	0.282215	0.729697	1.06157	-0.366168	F2EHF8	0	0	0	0	0	0	0	0	0	0	0	0	1	0	0	0	0	0	1	0	0	1	1	0
F2E2G1	Predicted protein OS=Hordeum vulgare subsp. vulgare OX=112509 PE=2 SV=1	High	metabolic process;response to stimulus		catalytic activity	Pf01625	0.102358	0.279462	0.00542244	-0.0779228	-0.155684	0.113651	-0.0507176	0.0179024	-0.0567663	0.0971965	0.154836	0.0848347	-0.139826	-0.150819	0.0382711	-0.19934	0.0224834	0.290675	F2E2G1	0	0	0	0	0	0	0	0	0	0	0	0	0	0	0	0	0	0	0	0	0	0	0	0
A0A287WL01	ANK_REP_REGION domain-containing protein OS=Hordeum vulgare subsp. vulgare OX=112509 PE=4 SV=1	High					0.444717	0.295613	-0.0529484	0.650882	0.675055	0.909968	0.48103	0.2104	0.591298	0.791538	0.246652	1.20192	0.307384	-0.0178306	0.191977	-0.109645	-0.210001	1.33958	A0A287WL01	0	0	0	0	0	0	0	0	0	0	0	0	0	0	0	0	0	0	0	0	0	0	0	0
A0A287I4H5	Uncharacterized protein OS=Hordeum vulgare subsp. vulgare OX=112509 PE=4 SV=1	High					0.0738937	0.236656	-0.00888114	-0.584371	0.276977	-0.358123	0.0721146	0.0981494	0.144789	-0.288193	0.364031	-0.17571	0.086497	0.180148	0.307635	-0.126989	0.249704	0.461636	A0A287I4H5	0	0	0	0	0	0	0	0	0	0	0	0	0	0	0	0	0	0	0	0	0	0	0	0
F2CX56	Predicted protein OS=Hordeum vulgare subsp. vulgare OX=112509 PE=2 SV=1	High			RNA binding	Pf00076,Pf13893,Pf14259	0.086133	0.668721	0.156187	-1.36508	-0.295436	-1.24861	-0.309075	-0.0946157	-0.279154	-0.403443	0.13176	-0.229018	-0.354951	-0.152969	-0.955517	0.372383	0.059269	0.391194	F2CX56	0	0	0	0	0	0	0	0	0	0	0	0	0	0	0	0	0	0	0	0	0	0	0	0
A0A287VPX4	2Fe-2S ferredoxin-type domain-containing protein OS=Hordeum vulgare subsp. vulgare OX=112509 PE=4 SV=1	High					-0.0943822	0.126872	0.266227	-0.686674	0.407699	-0.328949	0.089072	0.52117	0.11808	-0.30834	0.179358	-0.73152	0.0669062	0.27586	0.423614	-0.66149	-0.0491571	-0.544579	A0A287VPX4	0	0	0	0	0	0	0	0	0	0	0	0	0	0	0	0	0	0	0	0	0	0	0	0
F2DLH9	Predicted protein OS=Hordeum vulgare subsp. vulgare OX=112509 PE=2 SV=1	High	metabolic process	ribosome	structural molecule activity	Pf00297	0.0630226	0.0395719	-0.512139	-0.211527	0.0337637	-0.816521	-0.0455072	-0.190295	-0.163869	-0.177619	0.00767884	-0.815713	-0.100851	-0.261378	0.257809	-0.345609	-0.49055	0.300239	F2DLH9	0	0	0	0	0	0	0	0	0	0	0	0	0	0	0	0	0	0	0	0	0	0	0	0
A0A287HTA9	Chlorophyll a-b binding protein, chloroplastic OS=Hordeum vulgare subsp. vulgare OX=112509 PE=3 SV=1	High					-0.96015	-0.257908	0.596693	-0.261219	-0.70339	-0.214156	0.156833	0.0230608	-0.00766693	-1.11755	-0.346173	-0.909989	1.1977	1.24364	0.267604	0.113986	0.124226	-2.05252	A0A287HTA9	0	0	0	0	0	0	0	0	0	0	0	0	0	0	0	0	0	-1	1	0	0	1	0	0
A0A287WP26	Uncharacterized protein OS=Hordeum vulgare subsp. vulgare OX=112509 PE=4 SV=1	High					0.0161624	-0.00961582	-0.144558	0.248941	0.307035	0.0525409	-0.149913	0.114853	0.124072	0.414062	0.227098	0.310801	-0.855917	-0.657294	-0.484385	-0.398356	-0.509054	-0.119073	A0A287WP26	0	0	0	0	0	0	0	0	0	0	0	0	0	0	0	0	0	0	0	0	0	0	0	0
F2CTG9	Predicted protein OS=Hordeum vulgare subsp. vulgare OX=112509 PE=2 SV=1	High	metabolic process	membrane	catalytic activity	Pf02163	-0.217535	-0.428852	-0.908752	0.221338	0.758123	0.190891	0.0639182	0.0224192	-0.46402	0.285645	0.612051	-0.241284	-0.97093	-1.00847	0.0521491	-0.486196	-0.261665	-1.024	F2CTG9	0	0	0	0	0	0	0	0	0	0	0	0	0	0	0	0	0	0	0	0	0	0	0	0
F2CQR0	Malate dehydrogenase OS=Hordeum vulgare subsp. vulgare OX=112509 PE=2 SV=1	High	metabolic process		catalytic activity	Pf00056,Pf01073,Pf02866	-0.68423	-0.00501361	1.26683	0.393384	0.14113	-0.045189	0.433933	0.540496	0.227708	-1.15319	0.0383373	0.0174336	2.03091	0.809531	0.257751	0.618527	0.680833	-0.512206	F2CQR0	0	0	0	0	0	0	0	0	0	0	0	0	1	0	0	0	0	0	1	0	0	1	1	0
F2DD22	Predicted protein OS=Hordeum vulgare subsp. vulgare OX=112509 PE=2 SV=1	High				Pf00805,Pf13599	0.148176	0.217171	0.0529981	-0.104978	0.0760134	-0.0455108	0.188624	0.363017	0.302037	0.611025	0.385749	0.370952	-0.221931	-0.136199	0.0829633	-0.0632436	0.182713	0.361304	F2DD22	0	0	0	0	0	0	0	0	0	0	0	0	0	0	0	0	0	0	0	0	0	0	0	0
F2D3T2	Predicted protein OS=Hordeum vulgare subsp. vulgare OX=112509 PE=2 SV=1	High	metabolic process;transport		catalytic activity;transporter activity	Pf01215,Pf10276	0.139066	-0.0233829	0.334971	0.424078	0.590706	0.593287	0.251988	0.300729	0.26058	0.496969	0.160689	0.378153	-0.316249	0.119634	0.0686321	-0.763162	-0.551926	-0.125692	F2D3T2	0	0	0	0	0	0	0	0	0	0	0	0	0	0	0	0	0	0	0	0	0	0	0	0
A0A287E536	Uncharacterized protein OS=Hordeum vulgare subsp. vulgare OX=112509 PE=4 SV=1	High					0.534374	0.490599	0.324604	0.907315	-0.145562	0.652557	0.159419	-0.190416	-0.063407	0.672945	-0.184618	0.658576	-0.401483	-0.847881	0.00632593	0.0387787	0.259998	1.21125	A0A287E536	0	0	0	0	0	0	0	0	0	0	0	0	0	0	0	0	0	0	0	0	0	0	0	0
F2CZC9	Peptide-methionine (R)-S-oxide reductase OS=Hordeum vulgare subsp. vulgare OX=112509 PE=2 SV=1	High	metabolic process;response to stimulus		catalytic activity	Pf01641	-0.324028	0.166999	0.202847	-0.182374	0.11611	-0.492269	0.0462348	0.216166	0.0544475	0.332517	0.343754	-0.173386	-0.214883	-0.217915	0.0791931	-0.203187	-0.246352	-0.5881	F2CZC9	0	0	0	0	0	0	0	0	0	0	0	0	0	0	0	0	0	0	0	0	0	0	0	0
M0Y9X7	Elongation factor 1-alpha OS=Hordeum vulgare subsp. vulgare OX=112509 PE=3 SV=1	High	metabolic process	cytoplasm	catalytic activity;nucleotide binding;RNA binding	Pf00009,Pf03143,Pf03144	-0.913113	0.683178	1.33609	0.979057	-0.03032	-0.123347	0.623092	0.501348	0.468395	-1.06065	-0.519883	-0.368309	2.5784	1.46161	1.19938	1.01571	1.31197	0.881071	M0Y9X7	0	0	0	0	0	0	0	0	0	0	0	0	1	0	0	0	0	0	1	0	0	1	1	0
F2CQR8	Chlorophyll a-b binding protein, chloroplastic OS=Hordeum vulgare subsp. vulgare OX=112509 PE=2 SV=1	High	metabolic process	membrane		Pf00504	-0.574294	0.478563	1.3964	-1.10893	-0.330913	-0.826381	-0.102838	0.128438	-0.115325	-1.13276	-0.181267	-1.14932	1.1303	0.692204	-0.0235862	0.091976	0.29872	-1.98194	F2CQR8	0	0	0	0	0	0	0	0	0	0	0	0	0	0	0	0	0	-1	1	0	0	1	0	0
A0A287NMB4	Alpha-L-AF_C domain-containing protein OS=Hordeum vulgare subsp. vulgare OX=112509 PE=4 SV=1	High					-0.20047	-1.10972	-0.263388	1.51841	-0.912598	1.23239	0.0759505	-0.838068	0.0231961	-0.11347	0.0526153	1.21947	3.50825	2.05082	2.03704	1.47475	1.11506	0.324462	A0A287NMB4	0	0	0	1	0	0	0	0	0	0	0	0	1	1	1	0	0	0	4	1	0	3	2	1
A0A287R8Y9	GrpE protein homolog OS=Hordeum vulgare subsp. vulgare OX=112509 PE=3 SV=1	High					0.690546	0.504386	0.0984307	0.755069	0.471687	0.850052	0.54797	0.213468	0.621116	0.791871	0.26933	1.19957	-0.361653	-0.0760787	0.103981	0.189273	0.140981	0.912868	A0A287R8Y9	0	0	0	0	0	0	0	0	0	0	0	0	0	0	0	0	0	0	0	0	0	0	0	0
F2CZH0	Predicted protein OS=Hordeum vulgare subsp. vulgare OX=112509 PE=2 SV=1	High				Pf02575	0.611661	0.430527	0.271566	0.118144	0.135009	-0.391626	0.535499	0.349071	-0.0157397	0.363317	0.149702	0.14704	0.0323431	-0.928411	-0.0952093	0.139112	-0.425978	0.503508	F2CZH0	0	0	0	0	0	0	0	0	0	0	0	0	0	0	0	0	0	0	0	0	0	0	0	0
Q9M4D6	Putative acid phosphatase OS=Hordeum vulgare OX=4513 GN=bci-3 PE=2 SV=2	High	metabolic process		catalytic activity	Pf03767	-0.788557	0.596751	-0.252044	-0.706907	-0.00142931	-0.936294	0.196037	0.794841	0.331296	0.285487	0.738337	-0.883037	-0.314642	2.14782	1.57072	0.915331	0.635763	-0.716219	Q9M4D6	0	0	0	0	0	0	0	0	0	0	0	0	0	1	1	0	0	0	2	0	0	2	0	1
M0UZA5	Cyanate hydratase OS=Hordeum vulgare subsp. vulgare OX=112509 GN=CYN PE=3 SV=1	High	metabolic process		catalytic activity;DNA binding	Pf02560	0.762834	0.357878	0.339024	2.0594	0.43333	2.18936	0.62836	0.683142	1.08754	1.11599	0.762628	2.48168	0.419247	1.01564	0.457732	0.541996	0.993926	2.52973	M0UZA5	0	0	0	1	0	1	0	0	0	0	0	1	0	0	0	0	0	1	4	2	1	1	1	0
A0A287TVH7	Chlorophyll a-b binding protein, chloroplastic OS=Hordeum vulgare subsp. vulgare OX=112509 PE=3 SV=1	High					-0.333276	0.112775	1.45856	-0.959978	-0.57862	-0.792356	0.237104	0.102876	0.105152	-2.31917	-0.55396	-1.10282	1.36159	0.933277	-0.0107666	0.100082	0.460842	-1.4682	A0A287TVH7	0	0	0	0	0	0	0	0	0	-1	0	0	0	0	0	0	0	0	1	0	1	0	1	0
F2E325	Predicted protein OS=Hordeum vulgare subsp. vulgare OX=112509 PE=2 SV=1	High	cellular homeostasis;metabolic process;regulation of biological process		catalytic activity	Pf00462	-0.0330619	-0.00877326	-0.215084	1.08634	0.46029	0.871529	0.172674	-0.354798	0.46873	1.46749	0.311919	1.59584	-0.790017	-0.30753	0.0736591	-0.0201065	-0.502686	0.611912	F2E325	0	0	0	0	0	0	0	0	0	0	0	1	0	0	0	0	0	0	1	0	1	0	0	0
B5TWC8	Late embryogenesis abundant protein OS=Hordeum vulgare subsp. vulgare OX=112509 GN=LEA3 PE=2 SV=1	High																							B5TWC8	0	0	0	0	0	0	0	0	0	0	0	0	0	0	0	0	0	0	0	0	0	0	0	0
A0A287MBL6	RRM domain-containing protein OS=Hordeum vulgare subsp. vulgare OX=112509 PE=4 SV=1	High					0.396369	0.503192	0.219501	0.0932572	0.669833	0.328815	0.21076	0.286945	0.322423	0.469419	0.543136	0.376449	-0.306843	0.010505	-0.237248	0.068171	-0.197028	0.409911	A0A287MBL6	0	0	0	0	0	0	0	0	0	0	0	0	0	0	0	0	0	0	0	0	0	0	0	0
F2CXT7	Fructose-bisphosphate aldolase OS=Hordeum vulgare subsp. vulgare OX=112509 PE=2 SV=1	High	metabolic process		catalytic activity	Pf00274																			F2CXT7	0	0	0	0	0	0	0	0	0	0	0	0	0	0	0	0	0	0	0	0	0	0	0	0
A1YV32	Photosystem I iron-sulfur center OS=Hordeum vulgare subsp. vulgare OX=112509 GN=psaC PE=3 SV=1	High	metabolic process;transport	membrane	catalytic activity;metal ion binding	Pf00037,Pf12838,Pf13183,Pf13187,Pf13237,Pf14697	0.012912	0.68363	1.09271	0.544614	0.508343	0.871711	0.384743	0.87784	0.340211	-0.0525322	0.636605	-0.288618	1.04848	0.783271	-0.0260891	0.0292369	0.326202	-0.052807	A1YV32	0	0	0	0	0	0	0	0	0	0	0	0	0	0	0	0	0	0	0	0	0	0	0	0
A0A287JG58	Plasma membrane ATPase OS=Hordeum vulgare subsp. vulgare OX=112509 PE=3 SV=1	High					-1.19554	-0.303276	0.257828	0.802009	0.567784	0.290261	-0.115054	-0.165993	0.0780254	-1.04946	-0.966229	-0.240045	2.53446	1.70091	1.75855	0.405622	1.36467	0.064515	A0A287JG58	0	0	0	0	0	0	0	0	0	0	0	0	1	1	1	0	0	0	3	0	0	3	1	1
F2DIE9	Predicted protein OS=Hordeum vulgare subsp. vulgare OX=112509 PE=2 SV=1	High	metabolic process		catalytic activity	Pf03767	0.168602	0.951684	0.837394	-0.117626	-0.585795	-1.61706	0.0885652	0.129453	-0.216768	0.559527	0.648326	-0.15004	0.377834	-0.237946	-0.449187	0.689037	-0.0984761	0.118007	F2DIE9	0	0	0	0	0	-1	0	0	0	0	0	0	0	0	0	0	0	0	1	1	0	0	0	0
A0A287EF15	Peptidyl-prolyl cis-trans isomerase OS=Hordeum vulgare subsp. vulgare OX=112509 PE=3 SV=1	High					-0.0190808	-0.020335	-0.228539	0.0718255	-0.178435	0.0750038	-0.285491	-0.161125	-0.0255942	-0.346037	-0.431236	-0.12658	-0.980459	-0.280927	-0.52989	-0.674745	-0.440335	-0.397677	A0A287EF15	0	0	0	0	0	0	0	0	0	0	0	0	0	0	0	0	0	0	0	0	0	0	0	0
F2DBI8	Peptidylprolyl isomerase (Fragment) OS=Hordeum vulgare subsp. vulgare OX=112509 PE=2 SV=1	High	metabolic process		catalytic activity	Pf00254	0.0209052	0.213567	0.460048	-0.106202	-0.128669	-0.104356	0.119471	0.320081	0.294272	-0.0984998	-0.148613	0.0624914	0.576419	0.387322	-0.113237	0.0738611	0.210793	-0.00793023	F2DBI8	0	0	0	0	0	0	0	0	0	0	0	0	0	0	0	0	0	0	0	0	0	0	0	0
A0A287G4N5	Uncharacterized protein OS=Hordeum vulgare subsp. vulgare OX=112509 PE=4 SV=1	High					1.1644	1.11967	0.611912	2.73475	-0.0391242	1.82837	1.04104	0.563832	1.45298	2.62077	0.177311	2.51048	1.90562	1.94479	2.62393	2.08803	0.200307	2.76931	A0A287G4N5	0	0	0	1	0	1	0	0	0	1	0	1	1	1	1	1	0	1	9	2	2	5	4	1
A0A287LIR7	BURP domain-containing protein OS=Hordeum vulgare subsp. vulgare OX=112509 PE=4 SV=1	High					2.51749	1.51588	2.27627	3.32631	0.306911	2.84513	1.6981	-0.691327	0.790995	5.65476	1.2407	4.59041	2.50266	2.29286	3.84123				A0A287LIR7	1	1	1	1	0	1	1	0	0	1	0	1	1	1	1	0	0	0	11	5	3	3	5	2
F2D9C5	Predicted protein OS=Hordeum vulgare subsp. vulgare OX=112509 PE=2 SV=1	High	cellular homeostasis;metabolic process;regulation of biological process		catalytic activity	Pf00085,Pf13098,Pf13899,Pf13905,Pf14595	-0.0911285	0.0255694	0.0261856	-0.327944	0.266427	-0.0431873	0.163818	0.485578	0.0918781	-0.0506167	0.0635975	-0.340524	-0.293476	-0.0714934	-0.0977916	-0.276054	-0.229118	-0.33343	F2D9C5	0	0	0	0	0	0	0	0	0	0	0	0	0	0	0	0	0	0	0	0	0	0	0	0
A0A287M5E0	Fructose-bisphosphate aldolase OS=Hordeum vulgare subsp. vulgare OX=112509 PE=3 SV=1	High					-0.905523	0.524977	0.809913	0.719449	0.10075	0.333461	-0.156828	-0.0877633	-0.234826	-0.705013	0.236125	0.489335	0.914156	1.39456	0.0308215	1.20556	1.25027	0.690123	A0A287M5E0	0	0	0	0	0	0	0	0	0	0	0	0	0	0	0	0	0	0	0	0	0	0	0	0
A0A287H9K1	Uncharacterized protein OS=Hordeum vulgare subsp. vulgare OX=112509 PE=4 SV=1	High					-0.00946774	0.199125	0.267986	-0.710244	-0.169054	-0.652972	0.00725461	0.209781	-0.0709335	-0.269195	-0.0845946	-0.710719	-0.22591	-0.110362	0.124571	-0.269186	-0.311491	-0.403402	A0A287H9K1	0	0	0	0	0	0	0	0	0	0	0	0	0	0	0	0	0	0	0	0	0	0	0	0
F2CSE3	Predicted protein OS=Hordeum vulgare subsp. vulgare OX=112509 PE=2 SV=1	High	cell organization and biogenesis			Pf13326	0.412312	0.598767	0.763689	-0.683134	-0.180294	-0.352437	0.41798	0.0781031	0.573867	-0.256352	-0.191914	-0.126547	1.0159	0.917478	0.107772	0.0666345	-0.0308257	0.309798	F2CSE3	0	0	0	0	0	0	0	0	0	0	0	0	0	0	0	0	0	0	0	0	0	0	0	0
A0A287EXZ5	CBM20 domain-containing protein OS=Hordeum vulgare subsp. vulgare OX=112509 PE=4 SV=1	High					-0.571255	0.102229	0.241094	-0.562109	-0.306041	-0.720993	-0.147216	0.185756	-0.283372	-0.854326	-0.114127	-0.74111	0.452579	0.332626	-0.167966	0.138228	0.300885	-0.852574	A0A287EXZ5	0	0	0	0	0	0	0	0	0	0	0	0	0	0	0	0	0	0	0	0	0	0	0	0
A0A287SAK7	Prefoldin subunit 4 OS=Hordeum vulgare subsp. vulgare OX=112509 PE=3 SV=1	High					0.103883	-0.0825529	-0.0272251	0.1181	0.268189	-0.134683	-0.11376	-0.124463	0.0201617	0.744015	0.370095	0.455761	-0.563784	-0.146513	0.199628	-0.153922	-0.572333	-0.0636374	A0A287SAK7	0	0	0	0	0	0	0	0	0	0	0	0	0	0	0	0	0	0	0	0	0	0	0	0
M0VTW7	Acyl carrier protein OS=Hordeum vulgare subsp. vulgare OX=112509 PE=3 SV=1	High	metabolic process			Pf00550,Pf14573	0.146956	0.36772	-0.170181	-0.388815	-0.0176897	-0.509048	0.0128501	-0.183748	-0.0281337	-0.0152863	-0.0127688	-0.435698	0.0439961	0.0848188	0.29268	-0.484835	-0.306847	-0.0363295	M0VTW7	0	0	0	0	0	0	0	0	0	0	0	0	0	0	0	0	0	0	0	0	0	0	0	0
A0A287XAJ7	ADK_lid domain-containing protein OS=Hordeum vulgare subsp. vulgare OX=112509 PE=3 SV=1	High					-0.140737	0.281168		0.839868	0.369606	0.0509127	-0.0476291	0.053078	-0.168845	-0.0726655	0.0692807	0.177677	-0.436672	-0.158171	-0.86487	-0.191336	-0.305494	-0.573662	A0A287XAJ7	0	0	0	0	0	0	0	0	0	0	0	0	0	0	0	0	0	0	0	0	0	0	0	0
A0A0K0VKK1	CSP1 OS=Hordeum vulgare OX=4513 GN=CSP1 PE=2 SV=1	High	regulation of biological process		DNA binding;metal ion binding	Pf00098,Pf00313,Pf08206	0.507195	0.500161	0.264805	-0.229385	-0.180715	-0.541652	0.00719838	-0.148738	0.0307297	0.771639	-0.354819	0.582599	-0.475708	0.00826496	-0.548377	-0.132394	-0.75464	0.170629	A0A0K0VKK1	0	0	0	0	0	0	0	0	0	0	0	0	0	0	0	0	0	0	0	0	0	0	0	0
A0A287T8L9	S1 motif domain-containing protein OS=Hordeum vulgare subsp. vulgare OX=112509 PE=4 SV=1	High					-0.186042	-0.468567	-1.01899	-1.05325	-0.0129423	-0.911554	-0.321762	-0.028851	-0.494127	-0.462787	0.00974321	-0.688942	-0.32292	-0.766844	-0.231248	-0.800843	-0.441946	-0.747783	A0A287T8L9	0	0	0	0	0	0	0	0	0	0	0	0	0	0	0	0	0	0	0	0	0	0	0	0
A0A287UF89	Glutathione peroxidase OS=Hordeum vulgare subsp. vulgare OX=112509 PE=3 SV=1	High					-0.202523	0.0792234	-0.144009	0.235344	0.019731	0.137667	0.201505	-0.0313384	0.177861	0.564099	0.307374	0.435874	-0.564834	-0.249739	0.0542718	-0.167496	-0.53464	-0.0869752	A0A287UF89	0	0	0	0	0	0	0	0	0	0	0	0	0	0	0	0	0	0	0	0	0	0	0	0
A0A287FYT4	Uncharacterized protein OS=Hordeum vulgare subsp. vulgare OX=112509 PE=4 SV=1	High					-0.155893	-0.0475397	-0.101169	-0.252303	-0.511054	-0.320507	-0.245508	-0.146293	-0.207727	0.472846	-0.263658	0.283556	-0.866993	-0.307262	-0.243915	-0.503458	-1.08032	-0.0283734	A0A287FYT4	0	0	0	0	0	0	0	0	0	0	0	0	0	0	0	0	0	0	0	0	0	0	0	0
A0A287FDK0	Uncharacterized protein OS=Hordeum vulgare subsp. vulgare OX=112509 PE=4 SV=1	High					0.453901	0.437266	0.158557	0.411704	0.0144163	0.309171	0.222761	0.244708	0.465616	0.584487	0.229103	0.576915	-0.0210526	-0.0136027	0.234375	0.0186824	0.248576	0.880553	A0A287FDK0	0	0	0	0	0	0	0	0	0	0	0	0	0	0	0	0	0	0	0	0	0	0	0	0
A0A287UEZ6	S-adenosylmethionine synthase OS=Hordeum vulgare subsp. vulgare OX=112509 PE=3 SV=1	High					-0.0684748	0.288527	0.755274	-0.322336	-0.590593	-0.762531	-0.0822215	-0.147426	-0.20107	-0.746225	-0.0707393	-0.137682	0.0860638	0.0487339	-0.311607	0.603238	-0.134027	-0.543209	A0A287UEZ6	0	0	0	0	0	0	0	0	0	0	0	0	0	0	0	0	0	0	0	0	0	0	0	0
F2DVB3	Predicted protein OS=Hordeum vulgare subsp. vulgare OX=112509 PE=2 SV=1	High					-0.900024	-0.461704	-0.623021	-1.56332	0.210268	-0.991084	-0.616295	-0.189356	-0.467529	-0.666694	-0.148048	-0.633624	-1.42704	-0.161772	-0.135289	-0.866792	-0.636527	-1.16642	F2DVB3	0	0	0	-1	0	0	0	0	0	0	0	0	0	0	0	0	0	0	1	1	0	0	1	0
A0A287HST8	Chlorophyll a-b binding protein, chloroplastic OS=Hordeum vulgare subsp. vulgare OX=112509 PE=3 SV=1	High																							A0A287HST8	0	0	0	0	0	0	0	0	0	0	0	0	0	0	0	0	0	0	0	0	0	0	0	0
A0A287XZR9	Clathrin light chain OS=Hordeum vulgare subsp. vulgare OX=112509 PE=3 SV=1	High					0.71635	0.600238	0.0533058	0.464205	0.671675	0.240974	0.318802	-0.225238	0.492622	0.610379	0.540415	0.849994	-0.459327	-0.197826	-0.0638902	-0.228526	-0.564946	0.656509	A0A287XZR9	0	0	0	0	0	0	0	0	0	0	0	0	0	0	0	0	0	0	0	0	0	0	0	0
A0A287R5R0	Uncharacterized protein OS=Hordeum vulgare subsp. vulgare OX=112509 PE=4 SV=1	High					1.02879	1.25032	0.662878	0.544164	0.154683	0.519256	0.999366	-0.0116669	0.966128	2.08867	1.67602	2.00887	0.62751	0.727258	1.58827	2.07419	1.48617	3.00859	A0A287R5R0	0	0	0	0	0	0	0	0	0	1	1	1	0	0	1	1	0	1	6	0	3	3	2	1
A0A287R3Q7	Glutaredoxin domain-containing protein OS=Hordeum vulgare subsp. vulgare OX=112509 PE=4 SV=1	High					-0.443492	0.116508	-0.632343	-0.877389	0.253875	-0.779584	-0.312694	-0.164347	0.158235	-0.23955	-0.233532	-0.573091	-0.917245	0.389219	-0.365938	-0.796211	-1.04271	-0.972717	A0A287R3Q7	0	0	0	0	0	0	0	0	0	0	0	0	0	0	0	0	0	0	0	0	0	0	0	0
A0A287M9E0	Uncharacterized protein OS=Hordeum vulgare subsp. vulgare OX=112509 PE=4 SV=1	High					-0.69471	-0.603665	-0.802323	0.297061	0.155978	-0.378774	-0.535129	-0.849607	-0.743511	0.183225	-0.0780053	-0.563451	-1.5856		-0.0230027	-0.144758	-0.118095	0.0110375	A0A287M9E0	0	0	0	0	0	0	0	0	0	0	0	0	0	0	0	0	0	0	0	0	0	0	0	0
F2DCE0	Predicted protein OS=Hordeum vulgare subsp. vulgare OX=112509 PE=2 SV=1	High	metabolic process		catalytic activity	Pf00056,Pf02866	-0.735713	0.252999	1.10459	0.387394	0.241043	0.125342	0.452143	0.587944	0.359164	-1.39078	0.156305	0.114	1.99413	0.810835	0.738354	0.757482	0.90395	0.314058	F2DCE0	0	0	0	0	0	0	0	0	0	0	0	0	1	0	0	0	0	0	1	0	0	1	1	0
F2D621	Predicted protein OS=Hordeum vulgare subsp. vulgare OX=112509 PE=2 SV=1	High	cell organization and biogenesis	chromosome;nucleus	DNA binding	Pf00538	0.562462	0.0245656	-0.195151	0.725353	-0.10633	0.0453776	-0.328138	-0.249489	-0.138772	0.386176	-0.195229	0.606669	-1.89802	-0.805224	-0.40331	0.00673871	-1.59298	-0.423915	F2D621	0	0	0	0	0	0	0	0	0	0	0	0	-1	0	0	0	-1	0	2	0	0	2	1	1
F2D0D9	Predicted protein OS=Hordeum vulgare subsp. vulgare OX=112509 PE=2 SV=1	High			protein binding	Pf00498	0.546002	0.405314	0.133964	-1.10874	0.146476	-0.587038	0.340224	0.464327	0.480276	-0.0140735	0.754663	-0.198374	0.0315671	0.0679245	0.00136728	0.250637	0.483419	0.1124	F2D0D9	0	0	0	0	0	0	0	0	0	0	0	0	0	0	0	0	0	0	0	0	0	0	0	0
A0A287I0Z1	40S ribosomal protein S12 OS=Hordeum vulgare subsp. vulgare OX=112509 PE=3 SV=1	High					0.633022	0.656649	0.189525	-0.0840463	0.097567	-0.233574	0.373248	0.683295	-0.239279	0.332711	0.3108	0.523617	0.533153	-0.0334288	0.309249	0.193848	0.335702	1.1303	A0A287I0Z1	0	0	0	0	0	0	0	0	0	0	0	0	0	0	0	0	0	0	0	0	0	0	0	0
M0WJK0	Uncharacterized protein OS=Hordeum vulgare subsp. vulgare OX=112509 PE=3 SV=1	High	metabolic process	ribosome	structural molecule activity	Pf00831	-0.216994	-0.520462	-0.878749	0.289682	0.423117	-0.334586	-0.025175	-0.0425841	-0.488939	0.0616839	-0.00853014	-0.303956	0.628078	0.445077	0.512799	0.116238	0.606981	0.114527	M0WJK0	0	0	0	0	0	0	0	0	0	0	0	0	0	0	0	0	0	0	0	0	0	0	0	0
A0A287TCL5	Peptidyl-prolyl cis-trans isomerase OS=Hordeum vulgare subsp. vulgare OX=112509 PE=3 SV=1	High					-0.237543	-0.0920743	-0.0672502	0.796708	-0.313157	0.571433	-0.475382	-0.398756	-0.323625	0.53507	-0.255836	0.593158	-1.25409	-0.101086	-0.587953	-0.418103	-0.620038	-0.149804	A0A287TCL5	0	0	0	0	0	0	0	0	0	0	0	0	0	0	0	0	0	0	0	0	0	0	0	0
Q43485	Chlorophyll a-b binding protein, chloroplastic OS=Hordeum vulgare OX=4513 GN=Lhca2 PE=2 SV=1	High	metabolic process	membrane		Pf00504	0.520853	1.47849	2.38479	-1.02858	-0.237657	-1.53616	0.955848	1.00258	0.500649	-0.753153	-0.170286	-0.588609	2.20168	0.790531	0.164606	0.356453	0.419672	-0.728406	Q43485	0	0	1	0	0	-1	0	0	0	0	0	0	1	0	0	0	0	0	3	2	0	1	1	0
A0A287GPS8	Uncharacterized protein OS=Hordeum vulgare subsp. vulgare OX=112509 PE=4 SV=1	High					0.939249	0.477594	0.485657	0.0597395	0.335469	-0.184285	0.882586	0.341763	0.744715	0.90765	0.32305	0.46017	0.178797	-0.347482	0.157872	-0.331394	-0.730256	0.121524	A0A287GPS8	0	0	0	0	0	0	0	0	0	0	0	0	0	0	0	0	0	0	0	0	0	0	0	0
Q3MUP2	Glutathione-S-transferase OS=Hordeum vulgare OX=4513 PE=2 SV=1	High			catalytic activity;protein binding	Pf02798,Pf13409,Pf13417	-0.613644	-0.510424	-0.17748	-0.359639	-0.0248808	-0.102703	-0.466425	-0.0686201	-0.398953	-0.734663	-0.152005	-0.256293	-0.0239845	0.0446505	-0.348969	-0.237519	-0.336568	-1.89323	Q3MUP2	0	0	0	0	0	0	0	0	0	0	0	0	0	0	0	0	0	-1	1	0	0	1	0	0
F2DK25	Predicted protein OS=Hordeum vulgare subsp. vulgare OX=112509 PE=2 SV=1	High					0.583558	-0.0558851	-0.383231	-0.0751639	0.821805	-0.114123	-0.13315	0.361649	-0.0375862	-0.170174	-0.172064	-0.962081	-0.567504	-0.22064	-0.215805	-0.147893	-0.211862	-0.62423	F2DK25	0	0	0	0	0	0	0	0	0	0	0	0	0	0	0	0	0	0	0	0	0	0	0	0
A0A287GFE9	Histone H4 OS=Hordeum vulgare subsp. vulgare OX=112509 PE=3 SV=1	High					-0.683219	0.0448865	1.32148	0.27745	-0.316781	0.320792	-0.176102	-0.101779	0.240682	-0.698344	-0.428827	0.261599	1.03833	0.501232	-0.243127	0.711376	0.759602	-0.202599	A0A287GFE9	0	0	0	0	0	0	0	0	0	0	0	0	0	0	0	0	0	0	0	0	0	0	0	0
F2CY55	Predicted protein OS=Hordeum vulgare subsp. vulgare OX=112509 PE=2 SV=1	High	metabolic process;response to stimulus		antioxidant activity;catalytic activity	Pf00141	-1.13275	0.087582	1.57056	0.747567	-0.0860526	0.457015	1.25838	0.931418	0.822408	-1.85831	-0.448144	-0.0617002	2.88387	1.57503	1.324	1.93235	1.95184	0.840904	F2CY55	0	0	1	0	0	0	0	0	0	-1	0	0	1	1	0	1	1	0	6	1	1	4	3	2
F2D3S4	Predicted protein OS=Hordeum vulgare subsp. vulgare OX=112509 PE=2 SV=1	High					0.151304	0.301999	0.872739	2.5313	0.497137	2.48105	1.01879	0.146421	1.06529	2.40241	0.410109	2.46116	1.08885	0.234974	0.422029	1.57611	-0.587793	2.16365	F2D3S4	0	0	0	1	0	1	0	0	0	1	0	1	0	0	0	1	0	1	6	2	2	2	3	0
A0A287F852	Uncharacterized protein OS=Hordeum vulgare subsp. vulgare OX=112509 PE=4 SV=1	High					0.260915	-0.0801864	-0.190786	0.380813	0.289063	0.349885	-0.026255	0.201933	-0.0193124	0.7316	0.243742	0.600565	-0.981504	-0.704132	-0.566034	0.151847	-0.294627	0.331162	A0A287F852	0	0	0	0	0	0	0	0	0	0	0	0	0	0	0	0	0	0	0	0	0	0	0	0
A0A287WRG8	Uncharacterized protein OS=Hordeum vulgare subsp. vulgare OX=112509 PE=4 SV=1	High					-0.428509	-0.198411	0.45883	1.14933	0.633055	0.912839	0.355283	0.281664	0.415272	1.02281	0.374188	1.42122	0.285028	-0.579501	-0.168998	-0.0734513	0.521295	0.240562	A0A287WRG8	0	0	0	0	0	0	0	0	0	0	0	0	0	0	0	0	0	0	0	0	0	0	0	0
F2D226	Predicted protein OS=Hordeum vulgare subsp. vulgare OX=112509 PE=2 SV=1	High	metabolic process		catalytic activity	Pf06026	-0.43703	0.0681173	0.660235	-0.379742	0.116025	-0.638768	0.112201	0.136953	-0.00709355	-1.76418	-0.330496	-1.05616	1.58777	0.494477	0.132472	0.223979	0.371565	-0.299648	F2D226	0	0	0	0	0	0	0	0	0	-1	0	0	1	0	0	0	0	0	2	0	1	1	2	0
F2D715	ATP synthase subunit d, mitochondrial OS=Hordeum vulgare subsp. vulgare OX=112509 PE=2 SV=1	High	metabolic process;transport	membrane;mitochondrion	transporter activity	Pf05873	0.514478	0.390843	0.0523503	0.973657	0.265152	0.824875	0.211959	-0.104641	0.0639543	0.603519	-0.125648	0.842614	-0.0200656	-0.557404	-0.0157328	-0.0466639	-0.232574	1.09238	F2D715	0	0	0	0	0	0	0	0	0	0	0	0	0	0	0	0	0	0	0	0	0	0	0	0
A0A287GMW7	Uncharacterized protein OS=Hordeum vulgare subsp. vulgare OX=112509 PE=3 SV=1	High					-1.07239	-0.899729	-0.474451	2.23289	-0.373151	1.87267	0.57224	0.099726	0.900009	0.316997	-0.0419902	2.11122	3.36735	1.60701	0.921151	1.17088	-1.33229	0.603425	A0A287GMW7	0	0	0	1	0	1	0	0	0	0	0	1	1	1	0	0	0	0	5	2	1	2	2	1
B1NC18	Ferritin OS=Hordeum vulgare OX=4513 GN=Fer1 PE=2 SV=1	High	cellular homeostasis;metabolic process;transport		catalytic activity;metal ion binding	Pf00210	-1.40668	-0.0652816	0.0691466	0.813246	-0.532256	0.446002	-0.218345	-1.06291	-0.0571483	-0.607784	0.475488	0.894914				2.01794	2.63394	1.13334	B1NC18	0	0	0	0	0	0	0	0	0	0	0	0	0	0	0	1	1	0	2	0	0	2	1	1
A0A287P873	RRM domain-containing protein OS=Hordeum vulgare subsp. vulgare OX=112509 PE=4 SV=1	High																							A0A287P873	0	0	0	0	0	0	0	0	0	0	0	0	0	0	0	0	0	0	0	0	0	0	0	0
A0A287XIA3	Uncharacterized protein OS=Hordeum vulgare subsp. vulgare OX=112509 PE=4 SV=1	High					-0.171192	-0.292794	-0.273042	-0.622835	0.0333684	-0.642286	-0.0730079	-0.143672	-0.0873982	-0.0598414	0.250616	-0.42914	-0.390008	-0.605774	0.195307	-0.214054	-0.31864	-0.297073	A0A287XIA3	0	0	0	0	0	0	0	0	0	0	0	0	0	0	0	0	0	0	0	0	0	0	0	0
A0A287IHR1	PEROXIDASE_4 domain-containing protein OS=Hordeum vulgare subsp. vulgare OX=112509 PE=3 SV=1	High																							A0A287IHR1	0	0	0	0	0	0	0	0	0	0	0	0	0	0	0	0	0	0	0	0	0	0	0	0
A0A287EXK4	Ubiquitin-like domain-containing protein OS=Hordeum vulgare subsp. vulgare OX=112509 PE=4 SV=1	High					0.688961	0.143967	0.385033	-0.29615	0.32936	0.0837727	0.000262716	0.152397	0.188658	0.163005	0.224426	0.410358	-0.394117	0.363042	-0.248999	-0.150131	-1.00366	-0.0905411	A0A287EXK4	0	0	0	0	0	0	0	0	0	0	0	0	0	0	0	0	0	0	0	0	0	0	0	0
A0A287M8C3	Uncharacterized protein OS=Hordeum vulgare subsp. vulgare OX=112509 PE=4 SV=1	High					-0.0382047	-0.265497	-0.0819048	-0.114031	0.403556	-0.0701994	0.244885	0.216083	0.599427	0.445635	0.179731	0.582255	-0.0505581	0.129051	-0.164132	-0.582679	-0.848824	0.071185	A0A287M8C3	0	0	0	0	0	0	0	0	0	0	0	0	0	0	0	0	0	0	0	0	0	0	0	0
A0A287IQB8	Uncharacterized protein OS=Hordeum vulgare subsp. vulgare OX=112509 PE=4 SV=1	High					-1.25891	0.470189	1.18081	-1.07098	-1.86068	-1.10016	-0.183127	-0.21646	0.00928129	-1.68666	-1.68305	-0.702771	2.07513	1.08707	0.485701	2.14497	2.22404	-0.250779	A0A287IQB8	0	0	0	0	-1	0	0	0	0	-1	-1	0	1	0	0	1	1	0	6	1	2	3	3	3
P08248	Plastocyanin, chloroplastic OS=Hordeum vulgare OX=4513 GN=PETE PE=2 SV=1	High	metabolic process;transport	membrane	metal ion binding	Pf00127,Pf13473	-0.971406	-0.220896	-0.296209	1.04485	0.783369	-1.07152	1.58101	1.55373	1.52375	-0.301369	-0.35645	-0.685696	-0.0530999	-0.219017	-1.94538	1.07974	0.173339	0.64298	P08248	0	0	0	0	0	0	1	1	1	0	0	0	0	0	-1	0	0	0	4	0	3	1	1	1
F2DU28	Predicted protein OS=Hordeum vulgare subsp. vulgare OX=112509 PE=2 SV=1	High	transport		metal ion binding		-0.160352	1.77935	-0.722078	2.14596	0.778354	0.596408	-0.987586	-0.355174	-0.986451	0.437585	0.946372	0.102091	-1.13693	-1.54461	-0.0730034	-0.935302	-1.03204	-0.862594	F2DU28	0	1	0	1	0	0	0	0	0	0	0	0	0	-1	0	0	0	0	3	2	0	1	1	2
F2DD79	Predicted protein OS=Hordeum vulgare subsp. vulgare OX=112509 PE=2 SV=1	High	metabolic process	membrane		Pf00111	0.466058	1.23688	0.495145	1.17476	1.16486	0.975573	0.117224	0.263481	0.134632	-0.847533	0.298319	-0.61436	-0.652683	0.850841	-0.568953	-0.0881319	-0.702317	-2.12448	F2DD79	0	0	0	0	0	0	0	0	0	0	0	0	0	0	0	0	0	-1	1	0	0	1	0	0
A0A287PJJ4	40S ribosomal protein S3a OS=Hordeum vulgare subsp. vulgare OX=112509 PE=3 SV=1	High					0.443274	-0.317819	-0.574325	0.703295	-0.232705	0.30644	0.0880124	-0.107085	-0.365527	0.687285	-0.268702	0.855105	-0.538334	-0.73153	-0.00226545	-0.505159	-1.27524	0.106118	A0A287PJJ4	0	0	0	0	0	0	0	0	0	0	0	0	0	0	0	0	0	0	0	0	0	0	0	0
A0A287Y069	Uncharacterized protein OS=Hordeum vulgare subsp. vulgare OX=112509 PE=3 SV=1	High					-0.339037	0.649929	1.31838	0.42569	-0.198298	0.0527339	0.322661	0.162031	0.252453	-0.844377	-0.209663	0.0120044	1.0909	0.808843	-0.297737	0.812098	0.626239	0.609966	A0A287Y069	0	0	0	0	0	0	0	0	0	0	0	0	0	0	0	0	0	0	0	0	0	0	0	0
F2E6I1	Predicted protein OS=Hordeum vulgare subsp. vulgare OX=112509 PE=2 SV=1	High				Pf00092,Pf13519,Pf13768	-0.646711	0.00643384	-0.367245	0.175606	-0.17073	-0.923927	-0.546393	-0.836466	-1.066	-2.1573	-0.556765	-0.456791	2.61777	1.39648	-0.0768226	2.46125	2.12822	1.8744	F2E6I1	0	0	0	0	0	0	0	0	0	-1	0	0	1	0	0	1	1	1	5	0	1	4	3	1
A0A287KM84	Peptidyl-prolyl cis-trans isomerase OS=Hordeum vulgare subsp. vulgare OX=112509 PE=3 SV=1	High					0.695212	0.5367	0.561461	-0.105291	-0.404939	-0.126417	-0.18809	0.360062	0.212411	-0.206572	0.117809	0.206327	-0.469212	0.0635476	-0.443763	-0.778922	-0.576416	-0.238166	A0A287KM84	0	0	0	0	0	0	0	0	0	0	0	0	0	0	0	0	0	0	0	0	0	0	0	0
A0A287WK03	Uncharacterized protein OS=Hordeum vulgare subsp. vulgare OX=112509 PE=3 SV=1	High					0.168474	0.324857	0.126554	-0.380654	-0.0975339	0.153915	-0.0815116	-0.0179985	-0.184585	-0.746856	-0.346561	-0.296967	0.412084	0.0726443	-0.0935995	0.12094	0.63642	0.221933	A0A287WK03	0	0	0	0	0	0	0	0	0	0	0	0	0	0	0	0	0	0	0	0	0	0	0	0
A0A287MDJ8	Uncharacterized protein OS=Hordeum vulgare subsp. vulgare OX=112509 PE=3 SV=1	High					1.76186	2.08446	1.08371	-0.640381	0.878648	-1.33936	0.626723	0.31928	0.975912	0.846557	1.12497	0.776779	0.362426	0.0476389	0.515889	0.384146	-0.256095	0.682157	A0A287MDJ8	1	1	0	0	0	0	0	0	0	0	0	0	0	0	0	0	0	0	2	2	0	0	1	1
A0A287T7V3	Histone H2A OS=Hordeum vulgare subsp. vulgare OX=112509 PE=3 SV=1	High					-1.85888	-0.944894	0.932568	-0.981845	-0.990684	-0.665801	-0.458847	0.422093	-0.340004	-2.51609	-0.691192	0.51957	3.34178	2.64947	0.727427	1.12978	0.834892	0.661919	A0A287T7V3	-1	0	0	0	0	0	0	0	0	-1	0	0	1	1	0	0	0	0	4	1	1	2	3	1
F2EFS3	Predicted protein OS=Hordeum vulgare subsp. vulgare OX=112509 PE=2 SV=1	High					0.319067	0.406969	-0.149965	0.131204	-0.0770753	-0.428292	-0.217077	-0.370121	-0.353708	0.3517	-0.0211152	-0.346145	-0.527773	-0.312496	0.167318	-0.700244	-0.140087	0.546019	F2EFS3	0	0	0	0	0	0	0	0	0	0	0	0	0	0	0	0	0	0	0	0	0	0	0	0
M0Y1I9	Uncharacterized protein OS=Hordeum vulgare subsp. vulgare OX=112509 PE=3 SV=1	High			protein binding	Pf00043,Pf13409,Pf13410,Pf13417,Pf14497	0.402075	0.657299	1.13679	0.780961	-0.0711087	1.03371	0.766204	0.714146	1.17946	0.583536	0.568238	1.09668	0.731995	0.842733	0.336029	1.57255	1.5675	2.1597	M0Y1I9	0	0	0	0	0	0	0	0	0	0	0	0	0	0	0	1	1	1	3	0	0	3	1	1
A0A287NZX3	Uncharacterized protein OS=Hordeum vulgare subsp. vulgare OX=112509 PE=4 SV=1	High					0.113592	-0.159641	-0.462462	0.66179	0.399114	0.578903	-0.0217165	-0.175652	-0.0809274	0.744654	0.52422	0.975524	-0.676178	-0.203471	-0.35495	-0.280237	-0.503274	-0.194013	A0A287NZX3	0	0	0	0	0	0	0	0	0	0	0	0	0	0	0	0	0	0	0	0	0	0	0	0
A0A287FAF8	Nascent polypeptide-associated complex subunit beta OS=Hordeum vulgare subsp. vulgare OX=112509 PE=3 SV=1	High					-0.00899282	-0.39382	-0.603648	0.767028	0.545795	0.176188	-0.294864	-0.351624	-0.900778	1.14573	0.599315	1.35501	-1.10241	-1.32474	-0.446407	0.50875	0.133653	1.1805	A0A287FAF8	0	0	0	0	0	0	0	0	0	0	0	0	0	0	0	0	0	0	0	0	0	0	0	0
F2CRM3	Predicted protein OS=Hordeum vulgare subsp. vulgare OX=112509 PE=2 SV=1	High	metabolic process	ribosome	structural molecule activity	Pf00542	-0.00122386	-0.316568	-0.402718	-0.113795	0.506425	-0.184647	0.28403	-0.0929179	-0.134614	0.234996	0.36052	-0.191973	-0.0555653	-1.07666	-0.114495	0.791161	0.543627	0.60255	F2CRM3	0	0	0	0	0	0	0	0	0	0	0	0	0	0	0	0	0	0	0	0	0	0	0	0
F2DPE3	Predicted protein OS=Hordeum vulgare subsp. vulgare OX=112509 PE=2 SV=1	High			catalytic activity;nucleotide binding	Pf00270,Pf00271	-0.223459	-0.050278	-0.330926	0.976403	1.70063	0.554869	-2.29464	-0.656663	-0.206754	1.36171	0.244067	0.268484							F2DPE3	0	0	0	0	1	0	-1	0	0	0	0	0	0	0	0	0	0	0	2	1	1	0	1	1
A0A287FCC2	Uncharacterized protein OS=Hordeum vulgare subsp. vulgare OX=112509 PE=4 SV=1	High					0.750205	1.11022	2.17428	0.722676	-1.1731	0.122773	-0.0430913	-0.164426	-0.264021	-1.16864	-0.252591	-0.73978	0.696545	-0.323221	0.439818	0.072891	0.607173	-0.761511	A0A287FCC2	0	0	1	0	0	0	0	0	0	0	0	0	0	0	0	0	0	0	1	1	0	0	0	0
F2EBJ8	Histone H2A OS=Hordeum vulgare subsp. vulgare OX=112509 PE=2 SV=1	High		chromosome;nucleus	DNA binding;protein binding	Pf00125	-0.378836	-0.0184107	1.03647	0.69368	-0.0705335	0.826285	-0.125022	-0.38638	-0.192321	-0.609278	-0.606075	-0.00631842	1.0871	0.17398	0.120199	0.731269	0.72062	0.0480872	F2EBJ8	0	0	0	0	0	0	0	0	0	0	0	0	0	0	0	0	0	0	0	0	0	0	0	0
M0V292	Uncharacterized protein OS=Hordeum vulgare subsp. vulgare OX=112509 PE=4 SV=1	High				Pf00327,Pf08079	0.414496	0.216484	-0.196492	0.419299	0.58531	-0.338503	0.356895	-0.00513402	0.174279	0.562252	0.246036	0.413778	0.0992913	-0.219832	0.774436	-0.0565136	-0.150272	0.170348	M0V292	0	0	0	0	0	0	0	0	0	0	0	0	0	0	0	0	0	0	0	0	0	0	0	0
A0A287UXA0	Uncharacterized protein OS=Hordeum vulgare subsp. vulgare OX=112509 PE=3 SV=1	High					0.172452	0.377356	-0.601651	-0.600775	-0.0199374	-0.824854	-0.363471	-0.344709	-0.351256	0.00248988	0.439931	-0.64734	-0.463831	-0.253282	0.103079	0.135946	-0.28087	0.0648589	A0A287UXA0	0	0	0	0	0	0	0	0	0	0	0	0	0	0	0	0	0	0	0	0	0	0	0	0
F2CS40	Aconitate hydratase OS=Hordeum vulgare subsp. vulgare OX=112509 PE=2 SV=1	High	metabolic process		catalytic activity;metal ion binding	Pf00330,Pf00694	0.0154005	2.41178	1.57155	2.21983	0.263698	1.54277	0.168391	-0.518673	0.27331	-1.02772	0.0683562	1.51122	1.5013	1.32851	1.00675	-0.0737446	-0.221088	-1.26084	F2CS40	0	1	1	1	0	1	0	0	0	0	0	1	1	0	0	0	0	0	6	4	1	1	2	1
F2E1V9	Predicted protein OS=Hordeum vulgare subsp. vulgare OX=112509 PE=2 SV=1	High	metabolic process	ribosome	RNA binding;structural molecule activity	Pf01250	-0.141813	0.0263309	-0.14922	-0.625837	-0.198552	-0.737972	-0.170744	-0.155345	-0.240315	-0.366928	-0.159494	-0.626443	-0.326353	-0.118613	-0.539651	-0.218047	-0.5594	-0.775916	F2E1V9	0	0	0	0	0	0	0	0	0	0	0	0	0	0	0	0	0	0	0	0	0	0	0	0
A0A287MPZ0	S10_plectin domain-containing protein OS=Hordeum vulgare subsp. vulgare OX=112509 PE=4 SV=1	High					0.206405	0.325992	-0.190487	-0.460819	0.0563627	-0.957065	-0.123576	-0.211094	-0.218049	0.0336362	0.335301	-0.365236	0.254898	-0.148515	0.0903619	-0.140138	-0.0826318	0.296307	A0A287MPZ0	0	0	0	0	0	0	0	0	0	0	0	0	0	0	0	0	0	0	0	0	0	0	0	0
F2DDF2	Predicted protein OS=Hordeum vulgare subsp. vulgare OX=112509 PE=2 SV=1	High	metabolic process	membrane	catalytic activity	Pf01230,Pf11969	-0.530536	-0.0912741	0.191705	-0.278578	-0.0576445	-0.31332	-0.0432412	-0.101336	-0.0810554	0.496428	0.125046	0.332682	-0.760854	0.328074	0.181915	-0.340741	-0.310542	-0.50058	F2DDF2	0	0	0	0	0	0	0	0	0	0	0	0	0	0	0	0	0	0	0	0	0	0	0	0
F2EHD3	Predicted protein OS=Hordeum vulgare subsp. vulgare OX=112509 PE=2 SV=1	High	metabolic process		catalytic activity;nucleotide binding;protein binding	Pf00004,Pf02861,Pf07724,Pf07728,Pf10431,Pf13191,Pf13401																			F2EHD3	0	0	0	0	0	0	0	0	0	0	0	0	0	0	0	0	0	0	0	0	0	0	0	0
A0A287VJ44	Uncharacterized protein OS=Hordeum vulgare subsp. vulgare OX=112509 PE=4 SV=1	High					0.217215	0.0363581	0.156435	0.412885	-0.0263724	-0.102262	-0.454702	-0.0977175	-0.0715975	0.528415	-0.071774	0.334667	-0.758408	-0.482073	-0.412126	-0.235449	-0.320809	-0.150494	A0A287VJ44	0	0	0	0	0	0	0	0	0	0	0	0	0	0	0	0	0	0	0	0	0	0	0	0
M0UF06	Uncharacterized protein OS=Hordeum vulgare subsp. vulgare OX=112509 PE=4 SV=1	High	metabolic process	ribosome	structural molecule activity	Pf01165	0.12474	0.0265522	-0.748897	0.0360574	0.248809	-0.305979	0.149128	-0.0324588	-0.190795	0.0356355	-0.110711	-0.288865	0.384264	-0.162657	-0.0126815	0.127227	-0.528284	0.220842	M0UF06	0	0	0	0	0	0	0	0	0	0	0	0	0	0	0	0	0	0	0	0	0	0	0	0
F2D4A4	Predicted protein OS=Hordeum vulgare subsp. vulgare OX=112509 PE=2 SV=1	High	metabolic process	ribosome	structural molecule activity	Pf00573,Pf14374	-0.109575	-0.575923	-0.296082	0.222643	-0.0396061	-0.136908	0.217704	-0.202276	-0.0932304	0.241553	-0.255413	0.788243	0.093734	-0.477117	-0.0190875	-0.241242	-0.754486	-0.0235804	F2D4A4	0	0	0	0	0	0	0	0	0	0	0	0	0	0	0	0	0	0	0	0	0	0	0	0
A0A287IXV9	Uncharacterized protein OS=Hordeum vulgare subsp. vulgare OX=112509 PE=4 SV=1	High					0.683336	0.274518	0.977815	-0.638437	0.113851	0.960076	0.687269	0.970772	1.1505	-0.136589	0.30999	1.31459	0.443373	-0.927833	0.453312	1.34594	0.933214	2.65281	A0A287IXV9	0	0	0	0	0	0	0	0	0	0	0	0	0	0	0	0	0	1	1	0	0	1	0	0
F2CW55	Small ubiquitin-related modifier OS=Hordeum vulgare subsp. vulgare OX=112509 PE=2 SV=1	High	metabolic process	nucleus	protein binding	Pf00240,Pf11976	0.386016	0.414606	0.25453	-0.138009	0.32194	-0.267496	0.265025	0.329413	0.693235	0.0990236	0.0838877	0.259319	-0.22804	0.249902	-0.399093	-0.343316	-0.13548	0.0974669	F2CW55	0	0	0	0	0	0	0	0	0	0	0	0	0	0	0	0	0	0	0	0	0	0	0	0
F2D2Q0	Predicted protein OS=Hordeum vulgare subsp. vulgare OX=112509 PE=2 SV=1	High			protein binding	Pf00684,Pf01471,Pf08823	-0.418055	0.0934453	-0.599098	1.19694	2.05507	2.32745	-0.57339	-0.529892	-0.40043	-0.180059	0.322881	1.23958	-1.39026	-1.72664	-3.98226	-3.18682	-2.65923	-2.70606	F2D2Q0	0	0	0	0	1	1	0	0	0	0	0	0	0	-1	-1	-1	-1	-1	7	2	0	5	1	3
A0A287E0R3	Histone H2A OS=Hordeum vulgare subsp. vulgare OX=112509 PE=3 SV=1	High																							A0A287E0R3	0	0	0	0	0	0	0	0	0	0	0	0	0	0	0	0	0	0	0	0	0	0	0	0
A0A287PJ55	Uncharacterized protein OS=Hordeum vulgare subsp. vulgare OX=112509 PE=4 SV=1	High					-0.478299	-0.17312	-0.540267	-0.556486	0.347009	-0.270745	-0.165862	-0.0267271	-0.674966	-0.616081	0.41825	-1.12164	-0.856992	-0.5214	0.295641	-0.168299	-0.363938	-0.810657	A0A287PJ55	0	0	0	0	0	0	0	0	0	0	0	0	0	0	0	0	0	0	0	0	0	0	0	0
A0A287JHN8	Uncharacterized protein OS=Hordeum vulgare subsp. vulgare OX=112509 PE=3 SV=1	High					0.373924	0.234269	0.459011	0.99281	0.255486	0.955123	0.239176	0.115682	0.150289	0.859091	0.350174	0.994982	0.229723	0.136173	0.163587	0.171875	-0.0695828	-0.59326	A0A287JHN8	0	0	0	0	0	0	0	0	0	0	0	0	0	0	0	0	0	0	0	0	0	0	0	0
A0A287FAD4	Uncharacterized protein OS=Hordeum vulgare subsp. vulgare OX=112509 PE=3 SV=1	High					0.408301	0.00849567	-0.495634	0.595505	0.391034	-0.346087	0.281897	-0.0237752	-0.136375	0.402259	0.0428178	0.0728452	0.0623061	-0.548174	0.0793557	-0.238422	-0.352543	-0.0144959	A0A287FAD4	0	0	0	0	0	0	0	0	0	0	0	0	0	0	0	0	0	0	0	0	0	0	0	0
F2DD09	Predicted protein OS=Hordeum vulgare subsp. vulgare OX=112509 PE=2 SV=1	High	metabolic process	ribosome	RNA binding;structural molecule activity		-2.15015	-1.98988	-2.35279	0.36989	-0.159615	-0.441093	-1.95081	-1.95079	-2.72901	-1.02882	-0.873488	-1.82142	-2.50532	-1.96848	0.697106	-1.57777	-1.33618	-2.47918	F2DD09	-1	-1	-1	0	0	0	-1	-1	-1	0	0	-1	-1	-1	0	-1	0	-1	11	3	4	4	4	3
A0A287K2G9	Non-specific lipid-transfer protein OS=Hordeum vulgare subsp. vulgare OX=112509 PE=3 SV=1	High					0.191002	0.061159	-0.584217	1.88627	-1.04674	0.178553	-0.656748	-1.08672	-0.182905	2.76488	-0.0259556	2.75639	-1.96838	-0.3423	-0.098032	1.39349	-0.926685	2.94866	A0A287K2G9	0	0	0	1	0	0	0	0	0	1	0	1	-1	0	0	0	0	1	5	1	2	2	3	0
F2ECW3	Predicted protein OS=Hordeum vulgare subsp. vulgare OX=112509 PE=2 SV=1	High	cellular homeostasis;metabolic process;regulation of biological process		catalytic activity	Pf00462	-0.00249081	-0.470814	-0.459994	-0.0813197	-0.123022	-0.571527	-0.700634	-0.665921	-0.805236	-0.119211	-0.49261	-0.431422	-1.58618	-0.704766	-0.0935156	-1.01824	-1.65193	-2.12876	F2ECW3	0	0	0	0	0	0	0	0	0	0	0	0	-1	0	0	0	-1	-1	3	0	0	3	1	1
F2DGG4	Predicted protein OS=Hordeum vulgare subsp. vulgare OX=112509 PE=2 SV=1	High					1.93324	1.11578	2.57183	6.20617	1.28045	5.47282	1.53821	1.63359	3.61027	4.44378	1.5336	4.28773	0.976272	-0.273456	-0.48143				F2DGG4	1	0	1	1	0	1	1	1	1	1	1	1	0	0	0	0	0	0	10	4	6	0	4	2
A0A287E4C0	Aspartate aminotransferase OS=Hordeum vulgare subsp. vulgare OX=112509 PE=4 SV=1	High					0.00775697	-0.104114	1.0727	-0.125987	-0.610813	-1.00243	1.01552	0.927078	0.97798	-1.89221	-0.0220342	-0.307923	4.32049	3.77759	3.08779	2.7064	2.88025	1.86675	A0A287E4C0	0	0	0	0	0	0	0	0	0	-1	0	0	1	1	1	1	1	1	7	0	1	6	3	2
A0A287EI57	NAD(P)-bd_dom domain-containing protein OS=Hordeum vulgare subsp. vulgare OX=112509 PE=4 SV=1	High					0.332206	0.406001	0.355961	0.931452	0.176547	0.812268	0.0808341	0.0526846	0.214091	-0.838153	-0.458052	0.29963	0.108853	0.111548	-0.360742	0.411304	0.421885	0.200896	A0A287EI57	0	0	0	0	0	0	0	0	0	0	0	0	0	0	0	0	0	0	0	0	0	0	0	0
F2CZ05	Predicted protein OS=Hordeum vulgare subsp. vulgare OX=112509 PE=2 SV=1	High	metabolic process		metal ion binding	Pf01789	0.639078	0.618311	0.566385	0.88396	0.47286	0.958642	0.572044	0.644283	0.492048	0.716774	0.130989	0.825004	-0.635657	-0.345897	-0.401019	0.220767	-0.0367632	0.911451	F2CZ05	0	0	0	0	0	0	0	0	0	0	0	0	0	0	0	0	0	0	0	0	0	0	0	0
F2D849	Peptidylprolyl isomerase OS=Hordeum vulgare subsp. vulgare OX=112509 PE=2 SV=1	High	metabolic process		catalytic activity	Pf00254	-0.137232	0.137536	0.0590188	-0.074127	0.0433463	-0.0970745	0.191403	0.0755674	0.40161	0.0278281	0.0641921	-0.0504282	-0.949534	-0.745583	-0.50853	-0.782454	-0.465096	-0.553954	F2D849	0	0	0	0	0	0	0	0	0	0	0	0	0	0	0	0	0	0	0	0	0	0	0	0
A0A287EWN1	Nfu_N domain-containing protein OS=Hordeum vulgare subsp. vulgare OX=112509 PE=4 SV=1	High					0.725303	0.571206	0.557714	1.6356	0.533251	1.81327	0.863294	0.149015	1.11988	1.39194	0.621595	1.77814	0.173649	0.656285	1.20713	1.22134	0.793557	2.24307	A0A287EWN1	0	0	0	1	0	1	0	0	0	0	0	1	0	0	0	0	0	1	4	2	1	1	1	0
A0A287VPG4	2Fe-2S ferredoxin-type domain-containing protein OS=Hordeum vulgare subsp. vulgare OX=112509 PE=4 SV=1	High																							A0A287VPG4	0	0	0	0	0	0	0	0	0	0	0	0	0	0	0	0	0	0	0	0	0	0	0	0
A0A287RKI6	Sod_Cu domain-containing protein OS=Hordeum vulgare subsp. vulgare OX=112509 PE=4 SV=1	High																							A0A287RKI6	0	0	0	0	0	0	0	0	0	0	0	0	0	0	0	0	0	0	0	0	0	0	0	0
A0A287WLW1	PEROXIDASE_4 domain-containing protein OS=Hordeum vulgare subsp. vulgare OX=112509 PE=3 SV=1	High					-0.378894	0.210547	1.05996	1.00285	-0.426075	0.360639	0.369254	0.44866	0.127069	-0.681617	-0.446958	0.282095	2.01986	1.22092	0.573967	0.731642	1.27142	-0.313683	A0A287WLW1	0	0	0	0	0	0	0	0	0	0	0	0	1	0	0	0	0	0	1	0	0	1	1	0
A0A287LW87	Uncharacterized protein OS=Hordeum vulgare subsp. vulgare OX=112509 PE=4 SV=1	High					-0.104508	0.497267	1.53676	0.615262	0.137426	-0.0944353	0.233728	0.186903	0.452993	-0.497478	0.122991	0.600925	1.28709	-0.144672	0.29458	1.28602	-0.216871	-0.063248	A0A287LW87	0	0	1	0	0	0	0	0	0	0	0	0	0	0	0	0	0	0	1	1	0	0	0	0
F2DIC8	Predicted protein OS=Hordeum vulgare subsp. vulgare OX=112509 PE=2 SV=1	High				Pf14200	-0.422852	-0.776152	-0.914059	2.0073	0.520898	1.27771	-0.311667	-0.626795	-0.876496	1.06487	0.407461	0.811466	-0.74488	-0.790705	0.350575	0.167238	-0.449983	0.531844	F2DIC8	0	0	0	1	0	0	0	0	0	0	0	0	0	0	0	0	0	0	1	1	0	0	1	0
A0A287XK66	Histone H2A OS=Hordeum vulgare subsp. vulgare OX=112509 PE=3 SV=1	High					2.15203	2.49636	2.19422	-0.520315	0.299498	-0.491765	0.333517	0.138389	-0.315773	-0.774471	0.662273	0.965486				0.433623	0.664207	0.330434	A0A287XK66	0	0	0	0	0	0	0	0	0	0	0	0	0	0	0	0	0	0	0	0	0	0	0	0
A0A287V6N5	SWIM-type domain-containing protein OS=Hordeum vulgare subsp. vulgare OX=112509 PE=4 SV=1	High					-0.234553	-0.233838	-0.1962	-0.393859	0.126578	-0.690436	-0.105739	-0.0551281	0.135616	-0.454227	-0.35062	-0.412415	0.046329	-0.0486234	0.192725	-0.616398	-0.869457	-0.636459	A0A287V6N5	0	0	0	0	0	0	0	0	0	0	0	0	0	0	0	0	0	0	0	0	0	0	0	0
A0A287P420	Bet_v_1 domain-containing protein OS=Hordeum vulgare subsp. vulgare OX=112509 PE=4 SV=1	High					0.406652	1.63954	0.637636	3.07855	-0.194709	-0.149661	-0.174439	-0.792624	-0.586055	2.74596	0.854116	1.68407	-1.1828	0.759995	0.714588				A0A287P420	0	1	0	1	0	0	0	0	0	1	0	1	0	0	0	0	0	0	4	2	2	0	2	1
F2D333	Glutamyl-tRNA(Gln) amidotransferase subunit C, chloroplastic/mitochondrial OS=Hordeum vulgare subsp. vulgare OX=112509 GN=GATC PE=2 SV=1	High	cell organization and biogenesis;metabolic process;regulation of biological process	mitochondrion	catalytic activity;nucleotide binding	Pf02686	0.267676	0.770198	0.530964	-0.062328	-0.0636664	-1.18378	0.149252	0.962131	0.265033	-0.398029	-0.186419	-0.724521	-0.276508	-0.911184	0.00999865	0.0836177	0.0172012	-0.0385989	F2D333	0	0	0	0	0	0	0	0	0	0	0	0	0	0	0	0	0	0	0	0	0	0	0	0
P60161	Cytochrome b6 OS=Hordeum vulgare OX=4513 GN=petB PE=3 SV=1	High	metabolic process;transport	membrane	catalytic activity;metal ion binding	Pf00033,Pf13631	-0.29059	-0.0754323	0.628717	-0.393074	-0.693451	-0.555909	-0.0196263	0.0609788	-0.087549	-1.17787	-0.472143	-0.886931	1.13824	0.384589	0.200014	0.251885	0.353201	-1.61918	P60161	0	0	0	0	0	0	0	0	0	0	0	0	0	0	0	0	0	-1	1	0	0	1	0	0
A0A287X798	Uncharacterized protein OS=Hordeum vulgare subsp. vulgare OX=112509 PE=4 SV=1	High					0.280793	0.256454	-0.362787	0.755443	0.354663	1.09837	-0.906113	0.511563	-0.544092	0.73411	0.35749	1.1515	-0.532735	-0.182562	-0.0513316	-0.576132	-0.695857	0.170836	A0A287X798	0	0	0	0	0	0	0	0	0	0	0	0	0	0	0	0	0	0	0	0	0	0	0	0
F2EE96	Predicted protein OS=Hordeum vulgare subsp. vulgare OX=112509 PE=2 SV=1	High					-0.607251	3.57335	4.86649	4.03506	3.07333	5.88722	-1.12563	0.122623	2.91623	0.222943	1.42466	2.98019	-1.7591	-2.57957	0.739061	-1.0729	1.78869	0.429434	F2EE96	0	1	1	1	1	1	0	0	1	0	0	1	-1	-1	0	0	1	0	10	5	2	3	2	4
M0W6T7	Uncharacterized protein OS=Hordeum vulgare subsp. vulgare OX=112509 PE=4 SV=1	High	development			Pf12646	-0.483966	-0.0115406	-0.576058	-1.21355	-0.233259	-1.32355	-0.123024	-0.16243	-0.780711	-1.26219	-0.11167	-1.13152	-0.839717	-0.233704	0.316266	-0.340027	-0.511152	-0.952983	M0W6T7	0	0	0	0	0	0	0	0	0	0	0	0	0	0	0	0	0	0	0	0	0	0	0	0
A0A287JDT6	PAP_fibrillin domain-containing protein OS=Hordeum vulgare subsp. vulgare OX=112509 PE=4 SV=1	High					-0.507275	-0.328972	0.539091	0.774128	-0.00544689	0.325699	0.5638	0.781596	0.475917	-1.08842	-0.487414	-0.155669	1.79887	0.630335	0.909813	0.756976	0.867439	0.310313	A0A287JDT6	0	0	0	0	0	0	0	0	0	0	0	0	1	0	0	0	0	0	1	0	0	1	1	0
A0A218LNQ7	Cytochrome b559 subunit beta OS=Hordeum vulgare OX=4513 GN=psbF PE=3 SV=1	High	metabolic process;transport	membrane	metal ion binding	Pf00283	0.0146943	0.200694	0.975908	-0.326577	0.357574	-0.629884	0.38753	0.183542	0.115282	-1.66166	0.0932586	-0.887091	2.53918	2.34286	1.74835	0.404933	0.153526	-0.781041	A0A218LNQ7	0	0	0	0	0	0	0	0	0	-1	0	0	1	1	1	0	0	0	4	0	1	3	2	1
A0A287P2M4	Uncharacterized protein OS=Hordeum vulgare subsp. vulgare OX=112509 PE=4 SV=1	High					0.403755	0.360685	0.522816	0.513474	0.697241	0.572663	0.00625167	0.179142	-0.0985146	0.59567	0.270669	0.451992	-0.2446	-0.411739	0.657903	0.708876	-0.468472	0.821936	A0A287P2M4	0	0	0	0	0	0	0	0	0	0	0	0	0	0	0	0	0	0	0	0	0	0	0	0
F2EGV5	Predicted protein OS=Hordeum vulgare subsp. vulgare OX=112509 PE=2 SV=1	High					-0.0623089	-0.134038	-0.907706	0.589726	0.332551	0.429928	0.0165048	-0.0445392	-0.135732	0.281561	-0.256864	0.314144	-0.0677992	-0.611595	-0.416273	-0.828854	-1.06684	-0.431132	F2EGV5	0	0	0	0	0	0	0	0	0	0	0	0	0	0	0	0	0	0	0	0	0	0	0	0
F2CPV3	Predicted protein OS=Hordeum vulgare subsp. vulgare OX=112509 PE=2 SV=1	High			RNA binding	Pf00076,Pf07292,Pf13893,Pf14259	0.326434	-0.101095	0.0516718	1.26485	0.35513	0.969911	0.202239	0.449594	0.16518	0.902805	0.0195022	0.935583	-0.542349	-0.700698	-0.623949	0.742982	-0.356192	0.252541	F2CPV3	0	0	0	0	0	0	0	0	0	0	0	0	0	0	0	0	0	0	0	0	0	0	0	0
A0A287Y1W9	Catalase OS=Hordeum vulgare subsp. vulgare OX=112509 PE=3 SV=1	High																							A0A287Y1W9	0	0	0	0	0	0	0	0	0	0	0	0	0	0	0	0	0	0	0	0	0	0	0	0
M0WSW2	HMA domain-containing protein OS=Hordeum vulgare subsp. vulgare OX=112509 PE=4 SV=1	High	transport		metal ion binding	Pf00403	-0.113504	0.207517	-0.160341	-0.725754	-0.0876405	-0.818295	0.0884946	-0.523086	-0.389612	0.249991	-0.13525	-0.539669	-1.09466	-0.783581	-0.575164	-1.30459	-1.52518	-1.48327	M0WSW2	0	0	0	0	0	0	0	0	0	0	0	0	0	0	0	0	-1	0	1	0	0	1	0	1
A0A287GQU9	Uncharacterized protein OS=Hordeum vulgare subsp. vulgare OX=112509 PE=4 SV=1	High					0.378309	0.225207	0.245523	-0.467681	0.442104	-0.573234	0.0769827	0.0642594	0.316255	0.332381	0.490961	0.470413	-0.393189	-0.00409054	-0.325886	-0.481742	-0.394636	0.40414	A0A287GQU9	0	0	0	0	0	0	0	0	0	0	0	0	0	0	0	0	0	0	0	0	0	0	0	0
F2CTB3	Predicted protein OS=Hordeum vulgare subsp. vulgare OX=112509 PE=2 SV=1	High				Pf01918	0.685724	0.87484	-0.0271732	0.181334	0.192252	0.61934	0.466966	-0.326087	0.599822	1.2014	0.94279	1.42468	0.274144	0.236089	0.246712	0.65302	0.381375	1.51737	F2CTB3	0	0	0	0	0	0	0	0	0	0	0	0	0	0	0	0	0	1	1	0	0	1	0	0
I1W6L2	Starch synthase IIIb OS=Hordeum vulgare subsp. vulgare OX=112509 PE=2 SV=1	High			catalytic activity	Pf00534,Pf03423,Pf08323,Pf13579,Pf13692	-0.0136713	-0.329697	-0.832211	-0.415727	1.34273	1.5454	-0.373459	0.147998	-0.188299	-0.17132	1.07047	0.0561104	-0.342944	-0.00902912	0.859508	-1.2815	0.0450172	-0.681033	I1W6L2	0	0	0	0	0	1	0	0	0	0	0	0	0	0	0	0	0	0	1	1	0	0	0	0
A1X809	14-3-3D OS=Hordeum vulgare subsp. vulgare OX=112509 PE=2 SV=1	High	regulation of biological process		enzyme regulator activity;protein binding	Pf00244	-0.856413	-0.797338	0.451383	0.920903	-0.688714	0.565717	0.236617	0.292072	0.460534	-1.84167	-0.429978	-0.762683	2.49376	1.18087	1.91042	1.57064	2.67797	0.965313	A1X809	0	0	0	0	0	0	0	0	0	-1	0	0	1	0	1	1	1	0	5	0	1	4	3	1
F2CVK2	Predicted protein OS=Hordeum vulgare subsp. vulgare OX=112509 PE=2 SV=1	High					0.323601	0.407009	0.247518	-0.839205	-0.0469411	-0.391033	0.482139	0.0878279	0.629523	-0.30361	0.309289	0.187453	0.357906	0.540184	0.253146	-1.17952	0.230048	0.321062	F2CVK2	0	0	0	0	0	0	0	0	0	0	0	0	0	0	0	0	0	0	0	0	0	0	0	0
F2EEA9	Predicted protein OS=Hordeum vulgare subsp. vulgare OX=112509 PE=2 SV=1	High				Pf00011																			F2EEA9	0	0	0	0	0	0	0	0	0	0	0	0	0	0	0	0	0	0	0	0	0	0	0	0
F2CTM6	Predicted protein OS=Hordeum vulgare subsp. vulgare OX=112509 PE=2 SV=1	High	metabolic process;response to stimulus		catalytic activity;nucleotide binding	Pf00004,Pf02861,Pf07724,Pf07728,Pf10431,Pf13401																			F2CTM6	0	0	0	0	0	0	0	0	0	0	0	0	0	0	0	0	0	0	0	0	0	0	0	0
A0A287EZP5	Uncharacterized protein OS=Hordeum vulgare subsp. vulgare OX=112509 PE=4 SV=1	High					-0.239098	0.231481	-0.298087	0.995147	-1.12267	0.738933	-0.87799	0.267278	0.0216809	0.508042	0.346666	1.13371	-1.6158	-1.32377	-0.0657629	1.38781	0.921504	0.719363	A0A287EZP5	0	0	0	0	0	0	0	0	0	0	0	0	-1	0	0	0	0	0	1	0	0	1	1	0
A0A287XLU8	KOW domain-containing protein OS=Hordeum vulgare subsp. vulgare OX=112509 PE=3 SV=1	High					-0.0713647	-0.346222	-0.736585	0.141332	0.118333	-0.549464	-0.152597	-0.0599857	-0.345453	0.0898534	-0.0186806	-0.412311	-0.479671	-0.497574	0.216075	-0.00234453	-0.55844	-0.230806	A0A287XLU8	0	0	0	0	0	0	0	0	0	0	0	0	0	0	0	0	0	0	0	0	0	0	0	0
A0A287R942	TPR_REGION domain-containing protein OS=Hordeum vulgare subsp. vulgare OX=112509 PE=4 SV=1	High					-0.125345	-0.393832	-0.979593	0.047426	0.294714	0.237904	-0.246917	-0.246222	-0.14286	-0.111391	-0.0313519	-0.0572294	-0.582289	0.00568647	-0.156483	-0.738113	-0.972114	-0.432113	A0A287R942	0	0	0	0	0	0	0	0	0	0	0	0	0	0	0	0	0	0	0	0	0	0	0	0
A0A287JZ63	Bowman-Birk type trypsin inhibitor OS=Hordeum vulgare subsp. vulgare OX=112509 PE=3 SV=1	High					-0.0435849	-0.06324	-0.117063	0.440485	-0.4516	-0.449886	-0.26807	0.418019	-0.186496	0.392169	-0.328809	0.0811686	-1.26135	-0.237344	-0.733571	-0.65888	-1.68126	-0.902385	A0A287JZ63	0	0	0	0	0	0	0	0	0	0	0	0	0	0	0	0	-1	0	1	0	0	1	0	1
B5LQU6	Actin depolymerization factor-like protein OS=Hordeum vulgare subsp. vulgare OX=112509 GN=Rpg4 PE=2 SV=1	High	cell organization and biogenesis	cytoskeleton	protein binding	Pf00241																			B5LQU6	0	0	0	0	0	0	0	0	0	0	0	0	0	0	0	0	0	0	0	0	0	0	0	0
A0A287WLF1	PKS_ER domain-containing protein OS=Hordeum vulgare subsp. vulgare OX=112509 PE=3 SV=1	High					-0.793636	0.352507	0.707755	0.903365	0.588882	1.05838	0.381413	0.413361	0.171662	-1.52177	0.0811667	0.393563				4.06325	4.04507	2.73146	A0A287WLF1	0	0	0	0	0	0	0	0	0	-1	0	0	0	0	0	1	1	1	4	0	1	3	2	1
M0Z1F6	Stress-response A/B barrel domain-containing protein OS=Hordeum vulgare subsp. vulgare OX=112509 PE=4 SV=1	High				Pf07876																			M0Z1F6	0	0	0	0	0	0	0	0	0	0	0	0	0	0	0	0	0	0	0	0	0	0	0	0
F2CVZ1	Histone H2A OS=Hordeum vulgare subsp. vulgare OX=112509 PE=2 SV=1	High		chromosome;nucleus	DNA binding;protein binding	Pf00125																			F2CVZ1	0	0	0	0	0	0	0	0	0	0	0	0	0	0	0	0	0	0	0	0	0	0	0	0
F2DTX2	Predicted protein OS=Hordeum vulgare subsp. vulgare OX=112509 PE=2 SV=1	High	metabolic process	cytoplasm;nucleus	RNA binding	Pf00567,Pf06003	0.349463	0.299984	0.0575493	1.08623	0.525901	1.1805	0.711525	0.656657	0.189237	1.18547	0.764408	1.43768	0.384924	0.23546	0.253778	0.456552	0.158673	1.0635	F2DTX2	0	0	0	0	0	0	0	0	0	0	0	0	0	0	0	0	0	0	0	0	0	0	0	0
A0A287MDR1	DEK_C domain-containing protein OS=Hordeum vulgare subsp. vulgare OX=112509 PE=4 SV=1	High					0.0464692	-0.310226	-0.403873	0.576385	0.396446	0.367484	-0.0942662	-0.297625	-0.127437	0.347952	-0.428319	0.30131	-1.01923	-0.69998	-0.146179	-0.900422	-1.62875	-0.597556	A0A287MDR1	0	0	0	0	0	0	0	0	0	0	0	0	0	0	0	0	-1	0	1	0	0	1	0	1
A0A287X5L7	Uncharacterized protein OS=Hordeum vulgare subsp. vulgare OX=112509 PE=4 SV=1	High					0.455472	0.767059	1.1188	0.136594	-0.770771	-0.517683	0.198533	0.294965	-0.242346	-0.712513	-0.676699	0.283136	0.911866	-0.138065	0.332904	0.499499	0.407684	0.615192	A0A287X5L7	0	0	0	0	0	0	0	0	0	0	0	0	0	0	0	0	0	0	0	0	0	0	0	0
F2E067	Histone H2A OS=Hordeum vulgare subsp. vulgare OX=112509 PE=2 SV=1	High		chromosome;nucleus	DNA binding;protein binding	Pf00125	-0.213702	-0.529772	-0.678924	1.72149	0.732373	1.95911	0.24041	0.110076	0.263721	1.06324	0.0986336	1.15638	0.290208	0.336908	-0.235854	-0.362574	-0.978654	0.39337	F2E067	0	0	0	1	0	1	0	0	0	0	0	0	0	0	0	0	0	0	2	2	0	0	1	0
A0A287EA30	Uncharacterized protein OS=Hordeum vulgare subsp. vulgare OX=112509 PE=4 SV=1	High					-0.132928	-0.553622	-0.970847	1.38391	0.282069	1.25023	0.311251	-0.0371782	-0.483603	1.15969	0.378507	1.1989	-1.50834	-2.9777	-0.9802	-0.313733	-2.44083	-1.20298	A0A287EA30	0	0	0	0	0	0	0	0	0	0	0	0	-1	-1	0	0	-1	0	3	0	0	3	1	2
F2DMA2	Predicted protein OS=Hordeum vulgare subsp. vulgare OX=112509 PE=2 SV=1	High				Pf07876	0.260116	-0.0478425	0.059849	0.279135	0.35166	0.222787	0.056687	0.320237	0.184575	0.0624764	-0.303116	0.289518	-0.611159	-0.389223	-0.406538	-0.168805	-0.530271	0.19095	F2DMA2	0	0	0	0	0	0	0	0	0	0	0	0	0	0	0	0	0	0	0	0	0	0	0	0
A0A287TJH8	Histone H2A OS=Hordeum vulgare subsp. vulgare OX=112509 PE=3 SV=1	High																							A0A287TJH8	0	0	0	0	0	0	0	0	0	0	0	0	0	0	0	0	0	0	0	0	0	0	0	0
F2CRU9	Predicted protein OS=Hordeum vulgare subsp. vulgare OX=112509 PE=2 SV=1	High	cell organization and biogenesis	chromosome;nucleus	DNA binding		0.803259	0.483619	1.27182	1.59216	-0.667992	1.72521	0.81687	-0.123844	0.941742	1.05797	0.86427	2.18365	1.58304	0.220306	0.379173	1.24341	1.23371	1.68752	F2CRU9	0	0	0	1	0	1	0	0	0	0	0	1	1	0	0	0	0	1	5	2	1	2	2	0
A0A287J7G2	Uncharacterized protein OS=Hordeum vulgare subsp. vulgare OX=112509 PE=4 SV=1	High					-0.567084	-0.161957	-0.898826	-1.53883	-0.0256348	-1.1208	-0.948114	-0.742812	-0.867766	-0.865807	-0.444799	-1.11825	-1.67879	-0.2863	-0.737831	-1.92983	-0.580051	-1.59776	A0A287J7G2	0	0	0	-1	0	0	0	0	0	0	0	0	-1	0	0	-1	0	-1	4	1	0	3	3	0
A0A287F3X4	Transcription initiation factor IIF subunit alpha OS=Hordeum vulgare subsp. vulgare OX=112509 PE=3 SV=1	High					0.0547042	-0.514217	-0.331683	0.0367559	1.11947	1.66681	-0.126087	-0.0797183	-0.258739	0.0296902	0.692988	0.59203	0.593466	-0.283665	-0.0943446	-1.48009	-0.173586	-0.24022	A0A287F3X4	0	0	0	0	0	1	0	0	0	0	0	0	0	0	0	0	0	0	1	1	0	0	0	0
F2E0R2	Acylphosphatase OS=Hordeum vulgare subsp. vulgare OX=112509 PE=2 SV=1	High			catalytic activity	Pf00708	0.140801	0.661791	0.971034	-0.0107503	0.0819722	-0.105404	0.626924	0.130894	0.451846	-0.35794	0.126516	0.118853	0.954685	0.796952	0.264402	0.459224	0.58604	0.187401	F2E0R2	0	0	0	0	0	0	0	0	0	0	0	0	0	0	0	0	0	0	0	0	0	0	0	0
A0A287J7B3	Uncharacterized protein OS=Hordeum vulgare subsp. vulgare OX=112509 PE=4 SV=1	High					-1.02953	-0.853713	-0.804089	-0.591938	-0.401681	-0.818217	-1.42027	-1.18906	-1.66832	-0.664999	0.276444	-0.690156	-2.28234	-0.188216	-0.905628	-1.14425	-0.276589	-1.80981	A0A287J7B3	0	0	0	0	0	0	0	0	-1	0	0	0	-1	0	0	0	0	-1	3	0	1	2	1	0
F2CXF2	Predicted protein OS=Hordeum vulgare subsp. vulgare OX=112509 PE=2 SV=1	High			RNA binding	Pf00013,Pf13014	0.102749	-0.0166987	-0.227418	0.143459	0.346341	-0.2863	-0.037003	-0.0435471	0.144345	0.499889	0.161186	0.625468	-0.459545	-0.280749	-0.383826	-0.106552	-0.343827	0.0147561	F2CXF2	0	0	0	0	0	0	0	0	0	0	0	0	0	0	0	0	0	0	0	0	0	0	0	0
P15543	Acyl carrier protein 3, chloroplastic OS=Hordeum vulgare OX=4513 GN=ACL1.3 PE=1 SV=2	High	metabolic process	membrane	catalytic activity;metal ion binding	Pf00550,Pf01532	-0.271255	-0.0842143	-0.431542	0.0964692	0.301215	0.180116	-0.166663	-0.230335	-0.104756	0.015339	-0.0382698	-0.608204	-0.828151	-0.356216	-0.325087	-0.721434	-0.590332	-0.289797	P15543	0	0	0	0	0	0	0	0	0	0	0	0	0	0	0	0	0	0	0	0	0	0	0	0
F2E5D0	Predicted protein OS=Hordeum vulgare subsp. vulgare OX=112509 PE=2 SV=1	High				Pf05922	0.45919	1.23416	0.668815	2.38343	2.12117	1.73502	0.556056	-0.485547	0.306131	1.96846	0.315998	1.71293	0.433183	-1.14607	0.739025	-0.0225837	-0.284392	1.00576	F2E5D0	0	0	0	1	1	1	0	0	0	1	0	1	0	0	0	0	0	0	5	3	2	0	2	1
F2DYN1	Predicted protein (Fragment) OS=Hordeum vulgare subsp. vulgare OX=112509 PE=2 SV=1	High			catalytic activity	Pf00293	0.0772689	0.0363308	-0.189549	-0.28429	-0.358462	-0.68122	-0.360873	-0.462951	-0.382751	0.566848	0.169357	0.358164	-1.16307	-0.668982	-0.161241	-0.127934	-0.385973	0.015473	F2DYN1	0	0	0	0	0	0	0	0	0	0	0	0	0	0	0	0	0	0	0	0	0	0	0	0
A0A287URD7	TPR_MLP1_2 domain-containing protein OS=Hordeum vulgare subsp. vulgare OX=112509 PE=4 SV=1	High					-0.340221	-0.695451	-1.09545	0.454641	0.433551	0.614668	-0.00306895	-0.824857	-1.36461	0.309539	0.0415835	0.131451	-1.00354	-1.47041	-0.178504	-0.992503	-1.39843	-1.24752	A0A287URD7	0	0	0	0	0	0	0	0	0	0	0	0	0	0	0	0	0	0	0	0	0	0	0	0
F2D810	Predicted protein OS=Hordeum vulgare subsp. vulgare OX=112509 PE=2 SV=1	High	metabolic process	ribosome	structural molecule activity	Pf00828	0.182833	0.669034	0.37207	0.347587	0.0634577	0.823741	0.38415	-0.112438	0.924542	-0.0878242	-0.170852	-1.3809	0.0443971	2.09273	0.399638	-0.170195	0.887577	0.301385	F2D810	0	0	0	0	0	0	0	0	0	0	0	0	0	1	0	0	0	0	1	0	0	1	0	1
F2DUI8	Predicted protein OS=Hordeum vulgare subsp. vulgare OX=112509 PE=2 SV=1	High	metabolic process;transport	membrane	transporter activity	Pf00119	0.9168	0.896311	2.036	0.517291	-1.35148	-0.227488	0.892412	1.05605	-0.116901	-2.48726	-0.678125	-0.113789	5.07927	2.33472	1.49854	2.40598	2.05411	-0.530082	F2DUI8	0	0	1	0	0	0	0	0	0	-1	0	0	1	1	0	1	1	0	6	1	1	4	3	2
A0A287UW51	Uncharacterized protein OS=Hordeum vulgare subsp. vulgare OX=112509 PE=4 SV=1	High																							A0A287UW51	0	0	0	0	0	0	0	0	0	0	0	0	0	0	0	0	0	0	0	0	0	0	0	0
F2CSC0	Predicted protein OS=Hordeum vulgare subsp. vulgare OX=112509 PE=2 SV=1	High	metabolic process	membrane		Pf04725	-0.112905	-0.0682163	0.0347	-0.371721	-0.071436	-0.198673	0.269614	-0.0744402	0.062099	-0.389926	-0.198111	-0.898803	0.625017	-0.013525	0.394851	0.212581	-0.218282	0.198366	F2CSC0	0	0	0	0	0	0	0	0	0	0	0	0	0	0	0	0	0	0	0	0	0	0	0	0
A0A287MLU1	HP domain-containing protein OS=Hordeum vulgare subsp. vulgare OX=112509 PE=4 SV=1	High					0.0661588	-0.0654655	-0.500203	0.425115	0.416949	0.320134	-0.0910919	0.330839	-0.0830813	0.935967	0.290007	0.371087	-0.779576	-0.230246	-0.188894	-0.343762	-0.793828	-0.165057	A0A287MLU1	0	0	0	0	0	0	0	0	0	0	0	0	0	0	0	0	0	0	0	0	0	0	0	0
F2DIR3	40S ribosomal protein S4 OS=Hordeum vulgare subsp. vulgare OX=112509 PE=2 SV=1	High	metabolic process	ribosome	RNA binding;structural molecule activity	Pf00900,Pf01479,Pf08071	-0.972583	-0.254628	0.530472	0.411737	-0.0414286	0.133353	0.025916	0.256733	-0.158938	-1.55719	-0.831422	-0.0791639	1.43512	0.720904	0.517398	1.20428	1.27877	0.606263	F2DIR3	0	0	0	0	0	0	0	0	0	-1	0	0	0	0	0	0	0	0	1	0	1	0	1	0
F2DAK8	Predicted protein OS=Hordeum vulgare subsp. vulgare OX=112509 PE=2 SV=1	High	metabolic process	ribosome	structural molecule activity	Pf00428	-0.351208	-0.0791135	-0.607	-0.150184	-0.486344	-0.850766	-0.798289	-0.811187	-0.891762	0.038092	-0.251202	-0.591239	-0.946965	-0.378893	0.272297	-0.612701	-1.12474	-0.564943	F2DAK8	0	0	0	0	0	0	0	0	0	0	0	0	0	0	0	0	0	0	0	0	0	0	0	0
F2D1N1	Predicted protein OS=Hordeum vulgare subsp. vulgare OX=112509 PE=2 SV=1	High					0.60882	0.691134	0.64371	-1.18454	0.149446	-1.43391	0.805288	0.545448	0.497582	-0.014925	0.603277	-1.03208	0.579668	0.30729	0.727359	0.097115	0.757691	0.0236398	F2D1N1	0	0	0	0	0	0	0	0	0	0	0	0	0	0	0	0	0	0	0	0	0	0	0	0
A0A287T8M5	Histone domain-containing protein OS=Hordeum vulgare subsp. vulgare OX=112509 PE=3 SV=1	High					0.266457	1.157	2.05547	-0.333277	-0.210126	-0.103796	0.349061	0.838151	0.312901	-0.630512	0.260919	1.02412	2.78939	1.60143	1.32088	0.134841	-0.368998	-0.170207	A0A287T8M5	0	0	1	0	0	0	0	0	0	0	0	0	1	1	0	0	0	0	3	1	0	2	1	1
T1TD43	Dehydrin 7 OS=Hordeum vulgare subsp. vulgare OX=112509 GN=Dhn7 PE=3 SV=1	High	response to stimulus																						T1TD43	0	0	0	0	0	0	0	0	0	0	0	0	0	0	0	0	0	0	0	0	0	0	0	0
A0A287SWB6	Ferredoxin OS=Hordeum vulgare subsp. vulgare OX=112509 PE=3 SV=1	High					-0.114197	0.552823	0.625772	-0.0160404	0.257538	0.334319	0.0824488	0.475593	-0.341267	0.287996	0.468279	0.159719	-0.500025	-0.0864808	-0.925338	0.572273	0.0967142	0.650844	A0A287SWB6	0	0	0	0	0	0	0	0	0	0	0	0	0	0	0	0	0	0	0	0	0	0	0	0
A0A287VF07	6-phosphogluconate dehydrogenase, decarboxylating OS=Hordeum vulgare subsp. vulgare OX=112509 PE=3 SV=1	High						1.4262	3.77062	0.98487	-0.640816	1.01076	-0.0879873	-0.614614	-0.560468	-1.01812	0.92726	0.577597	2.43434	1.39649	-1.4862				A0A287VF07	0	0	1	0	0	0	0	0	0	0	0	0	1	0	0	0	0	0	2	1	0	1	1	0
F2DDI1	Predicted protein OS=Hordeum vulgare subsp. vulgare OX=112509 PE=2 SV=1	High	metabolic process	membrane			-0.465692	-0.613437	0.335439	0.0775598	-0.0149773	0.0264153	0.430957	0.678402	0.598006	-0.0270066	0.234381	-0.0151078	0.633123	0.0616067	0.0634322	-1.06229	-0.226103	-0.932132	F2DDI1	0	0	0	0	0	0	0	0	0	0	0	0	0	0	0	0	0	0	0	0	0	0	0	0
A0A287QYP4	Uncharacterized protein OS=Hordeum vulgare subsp. vulgare OX=112509 PE=4 SV=1	High																							A0A287QYP4	0	0	0	0	0	0	0	0	0	0	0	0	0	0	0	0	0	0	0	0	0	0	0	0
Q40036	Putative protease inhibitor OS=Hordeum vulgare OX=4513 GN=Bsi1 PE=2 SV=1	High	metabolic process;regulation of biological process	extracellular	catalytic activity;enzyme regulator activity		1.90596	0.28787	1.81983	4.94688	0.316699	4.22044	1.77748	0.556797	2.26981	4.19647	0.693794	5.14266	1.51663	1.76594	-0.146786	1.31634	0.450766	2.76889	Q40036	1	0	1	1	0	1	1	0	1	1	0	1	1	1	0	0	0	1	11	4	4	3	5	1
F2DJB5	Predicted protein OS=Hordeum vulgare subsp. vulgare OX=112509 PE=2 SV=1	High	metabolic process;transport	mitochondrion	metal ion binding	Pf00034,Pf13442	0.209016	0.110973	0.104285	0.116857	0.297779	0.0880722	0.0257016	0.0450271	0.391764	0.490984	0.164355	0.503187	-0.294296	0.190571	-0.139428	-0.511223	-0.37931	0.102856	F2DJB5	0	0	0	0	0	0	0	0	0	0	0	0	0	0	0	0	0	0	0	0	0	0	0	0
A0A287PYF7	Uncharacterized protein OS=Hordeum vulgare subsp. vulgare OX=112509 PE=3 SV=1	High					-0.352128	-0.0998139	0.474746	-0.346222	-0.574416	-0.801084	-0.334353	-0.0628652	-0.318067	-1.17904	-0.498732	-0.557168	0.482089	0.165632	-0.603176	0.569301	0.346216	-0.795553	A0A287PYF7	0	0	0	0	0	0	0	0	0	0	0	0	0	0	0	0	0	0	0	0	0	0	0	0
Q43472	Glycine-rich RNA-binding protein blt801 OS=Hordeum vulgare OX=4513 GN=blt801 PE=1 SV=1	High	metabolic process;response to stimulus		DNA binding;RNA binding	Pf00076,Pf13893,Pf14259																			Q43472	0	0	0	0	0	0	0	0	0	0	0	0	0	0	0	0	0	0	0	0	0	0	0	0
F2CPV8	Predicted protein (Fragment) OS=Hordeum vulgare subsp. vulgare OX=112509 PE=2 SV=1	High		cytosol			-0.194863	0.301163	0.438088	0.46176	0.21123	-0.0588207	0.046633	-0.14442	0.226732	-0.295094	0.212244	0.0273323	0.141943	0.165337	0.326815	0.162449	0.344376	0.760176	F2CPV8	0	0	0	0	0	0	0	0	0	0	0	0	0	0	0	0	0	0	0	0	0	0	0	0
F2D127	Predicted protein OS=Hordeum vulgare subsp. vulgare OX=112509 PE=2 SV=1	High	metabolic process		catalytic activity	Pf00171	-1.33614	-0.776905	0.116425	1.91503	1.09674	1.13248	-0.387506	-0.82907	-0.35168	-0.734692	-0.239817	0.121328	-0.412576	-1.74637	1.35692	-1.04849	-2.55441	-1.1534	F2D127	0	0	0	1	0	0	0	0	0	0	0	0	0	-1	0	0	-1	0	3	1	0	2	1	2
F2D3V8	Predicted protein OS=Hordeum vulgare subsp. vulgare OX=112509 PE=2 SV=1	High	transport			Pf00790,Pf03127	-0.101641	-0.292565	-0.125961	0.489531	0.99183	0.100166	-0.193627	-0.317076	-0.266279	0.732961	0.154534	0.685508	-0.680272	-0.0956931	0.0127283	0.406423	-0.211247	0.471462	F2D3V8	0	0	0	0	0	0	0	0	0	0	0	0	0	0	0	0	0	0	0	0	0	0	0	0
M0YI48	zf-Tim10_DDP domain-containing protein OS=Hordeum vulgare subsp. vulgare OX=112509 PE=3 SV=1	High	transport	mitochondrion	metal ion binding	Pf02953	0.444898	0.245461	0.189925	0.395379	0.0818493	0.14121	0.190966	-0.13897	0.239384	0.888043	0.205841	0.794441	0.0277651	-0.158229	0.217444	-0.0984555	0.309797	1.18913	M0YI48	0	0	0	0	0	0	0	0	0	0	0	0	0	0	0	0	0	0	0	0	0	0	0	0
F2D788	Eukaryotic translation initiation factor 3 subunit J OS=Hordeum vulgare subsp. vulgare OX=112509 PE=2 SV=1	High	cell organization and biogenesis;metabolic process;regulation of biological process	cytoplasm	RNA binding	Pf08597	0.299729	0.470751	-0.234081	0.043835	0.0557066	-0.315634	-0.0989265	-0.431376	-0.0870396	0.187672	-0.174961	0.418691	-0.589603	-0.20362	0.222855	-1.08135	-0.317762	0.567663	F2D788	0	0	0	0	0	0	0	0	0	0	0	0	0	0	0	0	0	0	0	0	0	0	0	0
A0A287WGT6	PsbP domain-containing protein OS=Hordeum vulgare subsp. vulgare OX=112509 PE=4 SV=1	High					0.116	-0.158188	-0.151647	0.402537	-0.170195	0.208088	0.271773	0.143277	0.0033405	0.168758	-0.627347	-0.312379	-0.561124	-0.361693	-0.346093	-0.270021	-0.477734	-0.443976	A0A287WGT6	0	0	0	0	0	0	0	0	0	0	0	0	0	0	0	0	0	0	0	0	0	0	0	0
A0A287U980	Uncharacterized protein OS=Hordeum vulgare subsp. vulgare OX=112509 PE=4 SV=1	High					-0.150428	-0.39694	-1.06928	0.847093	0.238739	0.308826	-0.574688	-0.271571	-0.313768	0.735071	-0.226016	0.86893	-1.04639	-1.49236	-0.296783	-0.808343	-1.62677	-0.308917	A0A287U980	0	0	0	0	0	0	0	0	0	0	0	0	0	0	0	0	-1	0	1	0	0	1	0	1
A0A287TR47	Histone domain-containing protein OS=Hordeum vulgare subsp. vulgare OX=112509 PE=3 SV=1	High					3.60042	1.19466	3.25991	0.533095	0.000453581	1.31625	0.821686	0.0538031	0.439769	-1.40426	-1.3351	0.202238	4.1283	2.42086	1.99228	2.46906	1.64623	1.65679	A0A287TR47	1	0	1	0	0	0	0	0	0	0	0	0	1	1	1	1	1	1	8	2	0	6	3	2
A0A287U8S1	Uncharacterized protein OS=Hordeum vulgare subsp. vulgare OX=112509 PE=3 SV=1	High					1.29038	2.57131	3.49743	-1.48603	-0.452424	-1.84672	-0.939838	0.196161	-0.272214	-2.58654	-0.285901	-0.687417	4.23167	2.64467	2.00062	1.09771	1.77017	-0.806493	A0A287U8S1	0	1	1	0	0	-1	0	0	0	-1	0	0	1	1	1	0	1	0	8	3	1	4	2	3
M0XJ70	UBIQUITIN_CONJUGAT_2 domain-containing protein OS=Hordeum vulgare subsp. vulgare OX=112509 PE=4 SV=1	High				Pf00179	0.0186783	-0.0963344	-0.964096	-0.362157	-0.756541	-0.95402	-0.0693793	-0.455415	-0.426473	-0.202781	-0.837404	-0.39901	-0.729546	-0.267085	-0.357292	-1.19775	-0.54647	-2.21096	M0XJ70	0	0	0	0	0	0	0	0	0	0	0	0	0	0	0	0	0	-1	1	0	0	1	0	0
A0A287K0K3	Eukaryotic translation initiation factor 3 subunit A OS=Hordeum vulgare subsp. vulgare OX=112509 PE=4 SV=1	High					0.243685	-0.0764529	-0.579598	0.118163	0.538855	-0.328516	-0.33376	-0.38498	-0.453821	0.428216	0.737578	0.261756	-0.230611	-0.184974	0.23156	0.0772019	-0.521118	-0.0038287	A0A287K0K3	0	0	0	0	0	0	0	0	0	0	0	0	0	0	0	0	0	0	0	0	0	0	0	0
Q9M4B1	Allene oxide synthase OS=Hordeum vulgare OX=4513 GN=aos2 PE=2 SV=1	High	metabolic process		catalytic activity;metal ion binding	Pf00067	-0.00715687	-0.279936	1.08973	0.144516	-0.298893	-0.912653	-0.137947	0.0989434	0.150245	-0.313443	-0.234578	-0.24992	2.6216	1.87001	1.75659	1.00585	1.66112	1.30463	Q9M4B1	0	0	0	0	0	0	0	0	0	0	0	0	1	1	1	0	1	0	4	0	0	4	1	2
F2E6D7	Predicted protein OS=Hordeum vulgare subsp. vulgare OX=112509 PE=2 SV=1	High					0.664365	1.35374	0.81959	0.549414	0.41442	0.969635	0.732879	0.446041	1.0002	-0.109974	0.497956	0.941855	0.791163	0.612676	0.581167	1.69227	1.50415	2.45291	F2E6D7	0	0	0	0	0	0	0	0	0	0	0	0	0	0	0	1	1	1	3	0	0	3	1	1
A0A287SXA5	Uncharacterized protein OS=Hordeum vulgare subsp. vulgare OX=112509 PE=4 SV=1	High					0.0766545	-0.353751	0.0790526	0.251413	0.352306	0.417653	0.225425	0.237161	0.164743	0.643973	0.411927	0.900792	-0.404379	-0.171043	-0.180905	0.264914	-0.338396	0.115913	A0A287SXA5	0	0	0	0	0	0	0	0	0	0	0	0	0	0	0	0	0	0	0	0	0	0	0	0
Q43470	14-3-3-like protein B OS=Hordeum vulgare OX=4513 PE=2 SV=1	High			protein binding	Pf00244	0.116863	-0.0858229	0.0184028	0.412239	0.0501736	0.468211	-0.231635	-0.0105359	-0.24742	-0.919108	-0.791746	-0.0912385	0.688404	-0.11108	-0.0927734	0.739795	0.689578	-0.0484162	Q43470	0	0	0	0	0	0	0	0	0	0	0	0	0	0	0	0	0	0	0	0	0	0	0	0
F2CXA7	Germin-like protein OS=Hordeum vulgare subsp. vulgare OX=112509 PE=2 SV=1	High		extracellular	metal ion binding	Pf00190,Pf07883																			F2CXA7	0	0	0	0	0	0	0	0	0	0	0	0	0	0	0	0	0	0	0	0	0	0	0	0
F2D6H6	Peptidylprolyl isomerase OS=Hordeum vulgare subsp. vulgare OX=112509 PE=2 SV=1	High	metabolic process		catalytic activity	Pf00254	0.0122258	0.112525	0.0464125	-0.0633282	0.135636	-0.134202	0.243706	0.219184	0.413138	0.659179	0.173725	0.694651	-0.61776	-0.0671017	-0.337112	-0.413767	-0.451149	0.106857	F2D6H6	0	0	0	0	0	0	0	0	0	0	0	0	0	0	0	0	0	0	0	0	0	0	0	0
A0A287SJM9	Uncharacterized protein OS=Hordeum vulgare subsp. vulgare OX=112509 PE=4 SV=1	High					0.341983	0.0518868	0.142334	0.507592	0.172585	0.718151	0.521836	0.321982	0.697843	0.909442	0.157051	0.953965	-0.180726	0.141234	0.224058	-0.529625	-0.74682	-0.202892	A0A287SJM9	0	0	0	0	0	0	0	0	0	0	0	0	0	0	0	0	0	0	0	0	0	0	0	0
A0A287WRG3	60S ribosomal protein L13 OS=Hordeum vulgare subsp. vulgare OX=112509 PE=3 SV=1	High					-0.0744757	-0.639701	-0.870713	0.859963	0.539186	0.306655	0.0870442	-0.80151	-0.420373	0.859228	-0.384351	0.719989	-0.28568	-0.78803	-0.0151433	-0.267814	-1.73065	-0.28512	A0A287WRG3	0	0	0	0	0	0	0	0	0	0	0	0	0	0	0	0	-1	0	1	0	0	1	0	1
A0A287FWV2	Uncharacterized protein OS=Hordeum vulgare subsp. vulgare OX=112509 PE=4 SV=1	High					-0.157411	-0.667406	-0.298182	1.74735	0.834329	1.7418	0.694258	0.442758	0.305685	1.35745	0.289404	1.73292	-0.290317	-1.42135	0.263974	0.00836016	0.146974	0.44789	A0A287FWV2	0	0	0	1	0	1	0	0	0	0	0	1	0	0	0	0	0	0	3	2	1	0	1	0
A0A287I2U9	RRM domain-containing protein OS=Hordeum vulgare subsp. vulgare OX=112509 PE=4 SV=1	High					-0.55166	-0.412877	-0.603156	0.815771	0.686355	0.437925	-0.283613	0.0129737	-0.473053	0.299229	0.546723	0.0649726	-0.3885	0.232287	0.977166	-0.236191	0.0840575	-0.221583	A0A287I2U9	0	0	0	0	0	0	0	0	0	0	0	0	0	0	0	0	0	0	0	0	0	0	0	0
A0A287IVP4	Uncharacterized protein OS=Hordeum vulgare subsp. vulgare OX=112509 PE=3 SV=1	High																							A0A287IVP4	0	0	0	0	0	0	0	0	0	0	0	0	0	0	0	0	0	0	0	0	0	0	0	0
F2DY31	Predicted protein OS=Hordeum vulgare subsp. vulgare OX=112509 PE=2 SV=1	High	cell organization and biogenesis	cytoskeleton	protein binding	Pf00241	0.900576	0.850546	0.897717	0.721276	0.0469354	0.478728	-0.0256109	0.693121	0.491488	0.482699	0.387027	0.522351	0.618754	0.450155	0.204229	1.20579	0.461966	0.520385	F2DY31	0	0	0	0	0	0	0	0	0	0	0	0	0	0	0	0	0	0	0	0	0	0	0	0
A0A287WZD1	Uncharacterized protein OS=Hordeum vulgare subsp. vulgare OX=112509 PE=3 SV=1	High					-0.272329	-0.462732	-0.447483	-0.908097	-0.208027	-1.33285	-0.17941	-0.10573	-0.195533	-0.903467	-0.399909	-0.967039	-0.657774	-0.311044	-0.411026	-0.662982	-0.226007	-0.795445	A0A287WZD1	0	0	0	0	0	0	0	0	0	0	0	0	0	0	0	0	0	0	0	0	0	0	0	0
A0A287JVV6	Uncharacterized protein OS=Hordeum vulgare subsp. vulgare OX=112509 PE=4 SV=1	High					0.214861	0.136855	0.0341583	0.510421	0.217967	0.0142962	0.267732	0.0861247	0.229699	0.838655	0.142417	0.592845	-1.04543	0.288969	0.0789381	-0.110348	-0.482817	0.714196	A0A287JVV6	0	0	0	0	0	0	0	0	0	0	0	0	0	0	0	0	0	0	0	0	0	0	0	0
F2DT02	Predicted protein OS=Hordeum vulgare subsp. vulgare OX=112509 PE=2 SV=1	High		membrane		Pf04755,Pf07415	-1.53953	-0.476227	0.727522	-0.373218	-0.838827	0.174568	0.815162	1.18689	0.678134	-0.805522	-0.10418	0.418002	1.7824	0.398204	-0.540893	1.02793	0.870207	0.337321	F2DT02	-1	0	0	0	0	0	0	0	0	0	0	0	1	0	0	0	0	0	2	1	0	1	2	0
A0A287X3U5	HMA domain-containing protein OS=Hordeum vulgare subsp. vulgare OX=112509 PE=4 SV=1	High					0.247231	0.271757	0.42268	0.371387	0.177621	0.427216	-0.0659296	0.0257875	-0.185032	0.769181	0.416738	0.592706	0.0883269	0.0184966	0.541809	0.0977621	0.218152	0.761882	A0A287X3U5	0	0	0	0	0	0	0	0	0	0	0	0	0	0	0	0	0	0	0	0	0	0	0	0
M0XC90	RRM domain-containing protein OS=Hordeum vulgare subsp. vulgare OX=112509 PE=4 SV=1	High			RNA binding	Pf00076,Pf08777,Pf14259	0.51894	-0.217074	0.753117	1.88426	0.736938	1.85131	0.979602	0.0903546	0.513261	1.72232	1.70622	1.8596	0.421281	0.67218	1.34641	0.431626	-1.36373	0.482488	M0XC90	0	0	0	1	0	1	0	0	0	1	1	1	0	0	0	0	0	0	5	2	3	0	2	1
F2CXH1	Peptidylprolyl isomerase OS=Hordeum vulgare subsp. vulgare OX=112509 PE=2 SV=1	High	metabolic process		catalytic activity	Pf00254	-0.194262	0.0729505	-0.222611	-0.106503	0.252404	0.421972	0.404332	0.32299	0.487477	0.039341	-0.0152074	0.0573814	0.130678	0.348009	0.359179	0.24362	-0.0448471	0.0783765	F2CXH1	0	0	0	0	0	0	0	0	0	0	0	0	0	0	0	0	0	0	0	0	0	0	0	0
F2D1F3	Predicted protein (Fragment) OS=Hordeum vulgare subsp. vulgare OX=112509 PE=2 SV=1	High	metabolic process		catalytic activity;nucleotide binding	Pf03446,Pf03807,Pf14833	-0.345802	-0.431157	1.2844	0.83189	-0.24206	-0.359106	0.290223	-0.056203	0.0786666	-2.61059	-0.652375	-0.836585	3.72903	2.66059	0.861761	1.66826	1.94595	-0.291108	F2D1F3	0	0	0	0	0	0	0	0	0	-1	0	0	1	1	0	1	1	0	5	0	1	4	3	2
F2CWR0	Formate dehydrogenase, mitochondrial OS=Hordeum vulgare subsp. vulgare OX=112509 PE=2 SV=1	High	metabolic process	mitochondrion	catalytic activity;nucleotide binding	Pf00389,Pf01408,Pf02826,Pf03720	0.022747	-0.433382	0.675092	1.47759	-0.943389	1.47783	-0.596537	-0.112994	-0.498687	0.788999	0.910711	2.49744							F2CWR0	0	0	0	0	0	0	0	0	0	0	0	1	0	0	0	0	0	0	1	0	1	0	0	0
A0A287W7N2	Ubiquitin-like domain-containing protein OS=Hordeum vulgare subsp. vulgare OX=112509 PE=4 SV=1	High					-0.138128	-0.970133	-0.889428	1.26627	0.344859	0.82055	-0.150003	0.410857	0.0795458	0.677062	-0.315301	0.889066	-0.813358	-0.519309	-0.284668	-0.66468	-0.617364	0.0636435	A0A287W7N2	0	0	0	0	0	0	0	0	0	0	0	0	0	0	0	0	0	0	0	0	0	0	0	0
Q19D39	Mg-protoporphyrin IX chelatase OS=Hordeum vulgare subsp. vulgare OX=112509 GN=xantha-h PE=2 SV=3	High	metabolic process		catalytic activity;nucleotide binding		-0.313459	0.247561	0.931378	-2.92812	-1.29385	-2.00985	-0.366965	0.0873416	-0.576606	-2.68913	-0.0913101	-1.03806	1.4794	1.57262	0.813377	1.01193	1.65339	-0.85146	Q19D39	0	0	0	-1	0	-1	0	0	0	-1	0	0	0	1	0	0	1	0	5	2	1	2	2	2
F2EAD0	Predicted protein OS=Hordeum vulgare subsp. vulgare OX=112509 PE=2 SV=1	High		membrane	protein binding	Pf00168																			F2EAD0	0	0	0	0	0	0	0	0	0	0	0	0	0	0	0	0	0	0	0	0	0	0	0	0
F2CYP0	Predicted protein OS=Hordeum vulgare subsp. vulgare OX=112509 PE=2 SV=1	High				Pf04536	0.534599	0.563472	0.144838	-0.759094	-0.569188	-0.287705	-0.183616	-0.177911	-0.12444	0.0394462	-0.118263	-0.210129	-0.00314271	-0.221681	0.0427567	0.219503	-0.431596	-0.163263	F2CYP0	0	0	0	0	0	0	0	0	0	0	0	0	0	0	0	0	0	0	0	0	0	0	0	0
F2DFT8	Predicted protein OS=Hordeum vulgare subsp. vulgare OX=112509 PE=2 SV=1	High					0.689841	1.09806	0.58988	0.734845	0.377975	0.650759	1.16299	0.752194	0.67689	1.20641	0.831131	1.35535	1.12395	-0.210725	0.37076	1.20749	1.00164	1.99928	F2DFT8	0	0	0	0	0	0	0	0	0	0	0	0	0	0	0	0	0	1	1	0	0	1	0	0
M0UGZ2	Dihydrolipoyl dehydrogenase OS=Hordeum vulgare subsp. vulgare OX=112509 PE=3 SV=1	High	cellular homeostasis;metabolic process;regulation of biological process		catalytic activity;nucleotide binding	Pf00070,Pf01134,Pf02852,Pf07992,Pf12831																			M0UGZ2	0	0	0	0	0	0	0	0	0	0	0	0	0	0	0	0	0	0	0	0	0	0	0	0
Q70YJ6	Peptidylprolyl isomerase OS=Hordeum vulgare OX=4513 PE=2 SV=1	High	metabolic process		catalytic activity	Pf00254	0.206872	0.395069	0.140144	0.729024	0.282528	0.497693	0.0440874	0.441572	0.273706	0.977269	0.977416	0.979209	-0.583407	-0.228234	-0.13258	0.0541748	0.23045	0.413712	Q70YJ6	0	0	0	0	0	0	0	0	0	0	0	0	0	0	0	0	0	0	0	0	0	0	0	0
F2CQP0	Predicted protein OS=Hordeum vulgare subsp. vulgare OX=112509 PE=2 SV=1	High	metabolic process	membrane;nucleus	RNA binding;structural molecule activity	Pf00687	-0.343729	0.363072	0.717697	-0.887159	-0.725952	-0.865477	-0.188324	0.0256564	0.195681	-1.12643	-0.598736	-0.787045	1.32034	0.781304	0.135439	0.676605	0.700924	-0.728459	F2CQP0	0	0	0	0	0	0	0	0	0	0	0	0	0	0	0	0	0	0	0	0	0	0	0	0
F2E9Z6	Predicted protein (Fragment) OS=Hordeum vulgare subsp. vulgare OX=112509 PE=2 SV=1	High	metabolic process		catalytic activity;RNA binding	Pf00076,Pf13893,Pf14259	0.228901	-0.00913844	0.0617408	0.353982	0.366815	0.212904	0.475069	0.473205	0.434954	0.491829	0.278326	0.641347	-0.148782	-0.577876	0.114977	-0.0592402	-0.250705	0.452279	F2E9Z6	0	0	0	0	0	0	0	0	0	0	0	0	0	0	0	0	0	0	0	0	0	0	0	0
F2DF61	Predicted protein OS=Hordeum vulgare subsp. vulgare OX=112509 PE=2 SV=1	High			DNA binding	Pf01984	0.180677	0.332191	0.1071	-0.49733	0.326576	-0.203953	0.204266	0.168246	0.338485	0.2736	0.621517	0.418438	-0.244876	0.296398	0.274171	0.133714	0.223414	0.540004	F2DF61	0	0	0	0	0	0	0	0	0	0	0	0	0	0	0	0	0	0	0	0	0	0	0	0
M0UYP0	Photosystem II reaction center Psb28 protein OS=Hordeum vulgare subsp. vulgare OX=112509 PE=3 SV=1	High	metabolic process	membrane		Pf03912	0.0176503	0.171433	0.174611	-0.088464	0.393112	0.149172	0.49637	0.526029	0.396097	0.320684	0.360506	0.13971	-0.0217391	-0.0512234	0.0681249	-0.0884973	-0.0856693	-0.0925798	M0UYP0	0	0	0	0	0	0	0	0	0	0	0	0	0	0	0	0	0	0	0	0	0	0	0	0
F2DXD4	Eukaryotic translation initiation factor 3 subunit G OS=Hordeum vulgare subsp. vulgare OX=112509 PE=2 SV=1	High	cell organization and biogenesis;metabolic process;regulation of biological process	cytoplasm	RNA binding	Pf00076,Pf12353,Pf13893,Pf14259	1.60654	1.15244	0.579576	0.00406322	0.0550128	-0.307048	0.825651	0.782904	0.843844	0.692047	0.66678	1.12117	-0.671504	-0.467293	-0.516577	0.429413	-0.149739	0.281759	F2DXD4	1	0	0	0	0	0	0	0	0	0	0	0	0	0	0	0	0	0	1	1	0	0	1	0
A0A287NYJ2	Uncharacterized protein OS=Hordeum vulgare subsp. vulgare OX=112509 PE=4 SV=1	High					-0.110602	0.160622	-1.80691	-1.27217	-0.853793	-1.49686	-1.00969	-0.328844	-2.3163	-1.37355	-0.0397235	-1.19169	-1.7168	-1.83723	-1.0223	-0.314511	-0.141076	-0.716343	A0A287NYJ2	0	0	-1	0	0	0	0	0	-1	0	0	0	-1	-1	0	0	0	0	4	1	1	2	1	1
A0A287P2Y9	Uncharacterized protein OS=Hordeum vulgare subsp. vulgare OX=112509 PE=4 SV=1	High					-0.353763	0.117313	-0.0653	0.0855571	-0.699668	-0.180548	-0.346781	-0.183482	-0.340661	-0.706507	-0.3378	-0.549954	0.492588	-0.0222117	-0.469242	0.258621	0.427798	-0.253999	A0A287P2Y9	0	0	0	0	0	0	0	0	0	0	0	0	0	0	0	0	0	0	0	0	0	0	0	0
F2DAC0	V-type proton ATPase proteolipid subunit OS=Hordeum vulgare subsp. vulgare OX=112509 PE=2 SV=1	High	transport	membrane;vacuole	transporter activity	Pf00137																			F2DAC0	0	0	0	0	0	0	0	0	0	0	0	0	0	0	0	0	0	0	0	0	0	0	0	0
F2DVR4	Predicted protein OS=Hordeum vulgare subsp. vulgare OX=112509 PE=2 SV=1	High			RNA binding	Pf00076,Pf13893,Pf14259	0.200053	0.178338	-0.332396	-0.0591403	0.611201	0.0571839	0.290584	0.0285122	0.163338	0.237315	0.630284	0.465436	-0.483737	-0.302748	0.0366842	-0.316418	-0.368096	-0.107388	F2DVR4	0	0	0	0	0	0	0	0	0	0	0	0	0	0	0	0	0	0	0	0	0	0	0	0
F2D5K7	Predicted protein OS=Hordeum vulgare subsp. vulgare OX=112509 PE=2 SV=1	High				Pf00061,Pf08212	0.453476	0.299879	0.576381	1.05625	-0.281191	1.46648	-0.00839123	0.175953	-0.0952577	0.335981	0.702367	0.867849	-0.0324531	-0.60511	-0.317217	0.136268	0.0375938	-0.313393	F2D5K7	0	0	0	0	0	0	0	0	0	0	0	0	0	0	0	0	0	0	0	0	0	0	0	0
A0A287UL55	Uncharacterized protein OS=Hordeum vulgare subsp. vulgare OX=112509 PE=4 SV=1	High					-0.499161	-1.21759	-1.14838	0.336149	0.100431	-0.29735	-0.628178	-0.523137	-1.25024	-0.087014	-0.643107	-0.544823	-1.55784	-1.69331	-0.120497	-1.36451	-1.50879	-1.52434	A0A287UL55	0	0	0	0	0	0	0	0	0	0	0	0	-1	-1	0	0	-1	-1	4	0	0	4	1	2
F2EF71	Histone H2A OS=Hordeum vulgare subsp. vulgare OX=112509 PE=2 SV=1	High		chromosome;nucleus	DNA binding;protein binding	Pf00125				0.615362	0.574666	-2.16054	0.303103	0.209025	0.00333848	-0.341343	1.55137	1.02809				1.53201	1.87	0.236248	F2EF71	0	0	0	0	0	-1	0	0	0	0	1	0	0	0	0	1	1	0	4	1	1	2	1	2
A0A287KH95	Uncharacterized protein OS=Hordeum vulgare subsp. vulgare OX=112509 PE=3 SV=1	High					-0.114904	-0.45269	0.816445	0.492432	0.345338	0.177052	0.401723	0.419795	0.517689	-1.2184	-0.208208	-0.323274	3.28175	1.66903	2.23339	0.354323	0.526773	-0.165127	A0A287KH95	0	0	0	0	0	0	0	0	0	0	0	0	1	1	1	0	0	0	3	0	0	3	1	1
A0A287GDC9	Methyltransf_11 domain-containing protein OS=Hordeum vulgare subsp. vulgare OX=112509 PE=4 SV=1	High					-0.529014	0.248732	0.185355	-0.943731	0.216181	0.925578	0.826584	-0.202405	0.449206	0.592487	0.596753	-1.05472	1.44412	-0.505476	1.74657	2.22773	1.71196	1.92338	A0A287GDC9	0	0	0	0	0	0	0	0	0	0	0	0	0	0	1	1	1	1	4	0	0	4	1	1
A0A287RG57	SHSP domain-containing protein OS=Hordeum vulgare subsp. vulgare OX=112509 PE=3 SV=1	High					0.583424	0.762605	-0.32989	2.37189	1.82166	2.03747	0.21791	0.462253	0.737531	0.595648	-0.176176	0.503718	0.179431	-0.688015	0.174224	0.433498	-0.607905	1.09709	A0A287RG57	0	0	0	1	1	1	0	0	0	0	0	0	0	0	0	0	0	0	3	3	0	0	1	1
F2CSC5	Ribosomal protein L19 OS=Hordeum vulgare subsp. vulgare OX=112509 PE=2 SV=1	High	metabolic process	ribosome	structural molecule activity	Pf01280	0.156611	-0.254856	-0.867964	0.490787	0.062125	0.057199	-0.237956	-0.600154	-0.414452	0.68002	0.0423225	0.422387	-0.174493	0.0512143	0.0310095	-0.483353	-1.07375	0.199439	F2CSC5	0	0	0	0	0	0	0	0	0	0	0	0	0	0	0	0	0	0	0	0	0	0	0	0
F2DH67	Predicted protein OS=Hordeum vulgare subsp. vulgare OX=112509 PE=2 SV=1	High	metabolic process				0.570521	-0.106781	-0.32804	-2.21565	-0.315828	-1.58117	0.0378458	-2.15044	-0.668038	-0.713746	-0.0949066	-2.61096	0.692997		0.0238115	-0.386479		-3.04225	F2DH67	0	0	0	-1	0	-1	0	-1	0	0	0	-1	0	0	0	0	0	-1	5	2	2	1	1	1
F2CS54	Predicted protein OS=Hordeum vulgare subsp. vulgare OX=112509 PE=2 SV=1	High	cell organization and biogenesis		catalytic activity;nucleotide binding	Pf00012,Pf01968,Pf06723																			F2CS54	0	0	0	0	0	0	0	0	0	0	0	0	0	0	0	0	0	0	0	0	0	0	0	0
F2D7Y7	Predicted protein OS=Hordeum vulgare subsp. vulgare OX=112509 PE=2 SV=1	High					2.85065	4.07907	3.44833	-2.21091	0.866371	-2.27824	1.22174	1.09324	1.77588	-0.383664	0.635744	-0.164546	-0.147223	0.245408	0.0820433	-0.707851	-0.670966	-0.267705	F2D7Y7	1	1	1	-1	0	-1	0	0	1	0	0	0	0	0	0	0	0	0	6	5	1	0	2	1
A0A287PFD1	Glutamine synthetase OS=Hordeum vulgare subsp. vulgare OX=112509 PE=3 SV=1	High					-0.896702	0.318201	1.13152	-0.885361	-0.637621	-0.96768	-0.237904	0.139595	-0.102471	-1.52839	-0.35377	-1.56616	0.731528	0.321252	-0.480779	0.219951	0.533272	-1.90064	A0A287PFD1	0	0	0	0	0	0	0	0	0	-1	0	-1	0	0	0	0	0	-1	3	0	2	1	1	0
O48518	HvPIP1;3 protein OS=Hordeum vulgare OX=4513 GN=HvPIP1;3 PE=2 SV=2	High	transport	membrane	transporter activity	Pf00230	-0.334155	-0.853466	0.855422	0.914139	1.17884	0.425168	0.63429	0.79346	-0.311925	-0.855537	-0.230196	-0.574874	2.88771	2.49341	2.38744	0.408182	1.19576	-0.19075	O48518	0	0	0	0	0	0	0	0	0	0	0	0	1	1	1	0	0	0	3	0	0	3	1	1
A0A287TXN8	RRM domain-containing protein OS=Hordeum vulgare subsp. vulgare OX=112509 PE=4 SV=1	High					0.425191	-0.20811	-0.219367	1.35457	1.34651	1.34387	0.472385	0.119386	0.0246156	1.46853	-0.216138	1.55337	0.116198	-0.650246	0.0655445	-0.123952	-0.542177	-0.133482	A0A287TXN8	0	0	0	0	0	0	0	0	0	0	0	1	0	0	0	0	0	0	1	0	1	0	0	0
A0A218LNB6	Cytochrome b559 subunit alpha OS=Hordeum vulgare OX=4513 GN=psbE PE=3 SV=1	High	metabolic process;transport	membrane	metal ion binding	Pf00283,Pf00284	-0.206049	-0.0286553	0.936268	-0.499055	-0.528588	-0.662084	-0.173375	0.131824	-0.347047	-1.12307	-0.230698	-1.12764	1.32175	0.455664	0.310843	0.556724	1.10066	-1.63883	A0A218LNB6	0	0	0	0	0	0	0	0	0	0	0	0	0	0	0	0	0	-1	1	0	0	1	0	0
A0A287JIT5	AAI domain-containing protein OS=Hordeum vulgare subsp. vulgare OX=112509 PE=4 SV=1	High					-0.2419	-0.357052	-1.06465	0.483057	0.569152	0.302827	-0.200939	-0.156867	-0.033766	-0.0914511	0.304311	0.202424	-0.0567983	-0.323586	0.446051	0.0960015	-1.35638	0.958239	A0A287JIT5	0	0	0	0	0	0	0	0	0	0	0	0	0	0	0	0	0	0	0	0	0	0	0	0
A0A287S8C1	Uncharacterized protein OS=Hordeum vulgare subsp. vulgare OX=112509 PE=3 SV=1	High					0.0357106	0.0718603	0.46563	3.8145	0.323826	3.90161	0.771427	0.416671	0.399663	2.02101	0.336141	1.49819	-0.198346	0.147437	-0.747751	-1.07064	-0.563093	-0.739844	A0A287S8C1	0	0	0	1	0	1	0	0	0	1	0	0	0	0	0	0	0	0	3	2	1	0	2	0
F2CVR8	Predicted protein OS=Hordeum vulgare subsp. vulgare OX=112509 PE=2 SV=1	High	cell organization and biogenesis;metabolic process	mitochondrion	catalytic activity;metal ion binding	Pf01491	-0.0318003	-0.0734036	0.0405898	-0.497312	0.338152	-0.625609	-0.114549	-0.029429	-0.111779	0.349619	0.346192	-0.0408726	-0.389962	-0.105492	0.188578	-0.81537	-0.698842	-1.50705	F2CVR8	0	0	0	0	0	0	0	0	0	0	0	0	0	0	0	0	0	0	0	0	0	0	0	0
A0A287KFS3	Uncharacterized protein OS=Hordeum vulgare subsp. vulgare OX=112509 PE=4 SV=1	High					0.210299	0.494708	0.220858	-0.315047	-0.0465332	-0.743149	-0.684177	-0.817453	-0.0193479	-0.117043	0.119277	0.270053	-0.34891	0.260898	-0.00510687	2.58665	2.31285	1.98724	A0A287KFS3	0	0	0	0	0	0	0	0	0	0	0	0	0	0	0	1	1	1	3	0	0	3	1	1
F2CY68	Predicted protein OS=Hordeum vulgare subsp. vulgare OX=112509 PE=2 SV=1	High	metabolic process		catalytic activity;metal ion binding	Pf00675,Pf05193,Pf08367	1.47876	1.37479	1.74101	0.84659	0.813876	1.29945	-0.400924	0.626168	1.33298	-0.608052	0.680886	1.01301				2.74376	1.90482	3.43803	F2CY68	0	0	1	0	0	0	0	0	0	0	0	0	0	0	0	1	1	1	4	1	0	3	1	1
F2D9M2	Predicted protein OS=Hordeum vulgare subsp. vulgare OX=112509 PE=2 SV=1	High	metabolic process;response to stimulus		nucleotide binding;protein binding	Pf00183,Pf02518,Pf13589	0.00393463	-0.11033	-0.604062	1.08298	1.25053	0.872803	0.120369	0.365831	0.149435	0.370655	1.03946	0.47947	-0.640521	-0.716135	-0.963359	-0.871749	-0.779071	-0.728109	F2D9M2	0	0	0	0	0	0	0	0	0	0	0	0	0	0	0	0	0	0	0	0	0	0	0	0
F2E2M2	Predicted protein OS=Hordeum vulgare subsp. vulgare OX=112509 PE=2 SV=1	High					-0.360469	0.287882	-0.658504	-4.97869	-0.124496	-4.8045	-0.477729	-0.085558	-0.703378	-2.29433	0.127188	-3.67832	-0.422271	-0.284724	-0.315364	-1.01588	-0.418736	-0.829607	F2E2M2	0	0	0	-1	0	-1	0	0	0	-1	0	-1	0	0	0	0	0	0	4	2	2	0	2	0
F2DZ78	Predicted protein OS=Hordeum vulgare subsp. vulgare OX=112509 PE=2 SV=1	High					1.78165	3.03742	2.83295	-1.09027	1.25288	0.836886	2.85775	1.1154	2.66461	2.48744	1.73243	1.84205							F2DZ78	1	1	1	0	0	0	1	0	1	1	1	1	0	0	0	0	0	0	8	3	5	0	3	2
F2DGM9	Predicted protein OS=Hordeum vulgare subsp. vulgare OX=112509 PE=2 SV=1	High	regulation of biological process;response to stimulus	membrane;mitochondrion		Pf00581	-0.812448	0.136002	0.656577	1.09843	-0.196275	0.0701983	0.30027	-0.066589	0.218511	-1.6555	-0.300061	-0.387564	1.18624	-0.201829	-0.784344	0.740031	0.464494	0.276306	F2DGM9	0	0	0	0	0	0	0	0	0	-1	0	0	0	0	0	0	0	0	1	0	1	0	1	0
A0A287FYT8	CCHC-type domain-containing protein OS=Hordeum vulgare subsp. vulgare OX=112509 PE=4 SV=1	High																							A0A287FYT8	0	0	0	0	0	0	0	0	0	0	0	0	0	0	0	0	0	0	0	0	0	0	0	0
F2CRN3	Predicted protein OS=Hordeum vulgare subsp. vulgare OX=112509 PE=2 SV=1	High				Pf13943	-0.0988879	-0.0159552	-0.735334	-0.352507	-0.191094	-0.453036	-0.197844	-0.0381845	-0.576246	-0.549777	-0.461509	-0.236712	-0.696953	-0.170378	0.168866	-0.0560795	0.0689945	0.327217	F2CRN3	0	0	0	0	0	0	0	0	0	0	0	0	0	0	0	0	0	0	0	0	0	0	0	0
A0A287GNC1	PDZ domain-containing protein OS=Hordeum vulgare subsp. vulgare OX=112509 PE=4 SV=1	High					1.38009	0.551877	1.92351	1.52805	1.07888	1.9167	1.05091	0.707342	1.05811	-0.363228	-0.326753	0.514047	2.55961	-0.746304	0.53099	0.555608	0.536703	0.846486	A0A287GNC1	0	0	1	1	0	1	0	0	0	0	0	0	1	0	0	0	0	0	4	3	0	1	2	0
M0X4B4	Uncharacterized protein OS=Hordeum vulgare subsp. vulgare OX=112509 PE=4 SV=1	High					0.402779	1.69535	1.03867	0.285764	0.480657	-1.41337	-1.23047	-0.740503	-1.71194	-0.826882	0.0234443	0.305229	3.79302	2.72945	1.67333				M0X4B4	0	1	0	0	0	0	0	0	-1	0	0	0	1	1	1	0	0	0	5	1	1	3	1	2
F2CQF4	Amine oxidase OS=Hordeum vulgare subsp. vulgare OX=112509 PE=2 SV=1	High	metabolic process		catalytic activity;metal ion binding	Pf01179,Pf02727,Pf02728	0.765414	1.15068	0.355729	-2.06043	1.52854	-1.29387	0.0657096	-0.0174117	0.832451	-1.83847	0.62223	-0.524979	-1.13487	-0.0975814	-1.97689	-2.13132	-0.0101772	-2.1894	F2CQF4	0	0	0	-1	1	0	0	0	0	-1	0	0	0	0	-1	-1	0	-1	6	2	1	3	3	1
Q7DM44	Lichenase OS=Hordeum vulgare OX=4513 PE=3 SV=1	High	metabolic process		catalytic activity	Pf00332	0.286236	0.269491	0.554814	3.24803	0.802871	1.2418	0.0739285	-0.989435	-0.498383	-0.958006	-1.30751	0.232157	3.19968	1.99611	1.76855	1.07388	0.068993	-0.157601	Q7DM44	0	0	0	1	0	0	0	0	0	0	0	0	1	1	1	0	0	0	4	1	0	3	2	1
A0A287RWW3	ANK_REP_REGION domain-containing protein OS=Hordeum vulgare subsp. vulgare OX=112509 PE=4 SV=1	High																							A0A287RWW3	0	0	0	0	0	0	0	0	0	0	0	0	0	0	0	0	0	0	0	0	0	0	0	0
F2CR28	Predicted protein OS=Hordeum vulgare subsp. vulgare OX=112509 PE=2 SV=1	High					-0.324728	-0.549487	-0.92318	0.648781	0.219334	0.565227	0.152742	0.420498	0.0373082	0.271359	-0.0608258	-0.284088	-0.45584	-0.6924	-0.297711	0.00895735	-0.873466	-0.635676	F2CR28	0	0	0	0	0	0	0	0	0	0	0	0	0	0	0	0	0	0	0	0	0	0	0	0
Q5D5Z6	Dehydrin 7 OS=Hordeum vulgare subsp. spontaneum OX=77009 GN=Dhn7 PE=3 SV=1	High	response to stimulus				0.893993	-0.0411169	1.24404	3.24682	0.872666	2.89463	1.31368		1.50329	4.87954	1.78626	4.37475				1.43077	0.683342	3.47677	Q5D5Z6	0	0	0	1	0	1	0	0	1	1	1	1	0	0	0	0	0	1	7	2	4	1	2	1
F2CXD7	Predicted protein OS=Hordeum vulgare subsp. vulgare OX=112509 PE=2 SV=1	High				Pf02036,Pf14864	1.93076	2.07746	1.29729	0.0275828	0.178219	-0.258538	0.806039	0.432745	0.695186	1.12677	1.04774	1.41197	-0.431764	0.203951	-0.144535	0.833678	0.421173	1.44622	F2CXD7	1	1	0	0	0	0	0	0	0	0	0	0	0	0	0	0	0	0	2	2	0	0	1	1
F2EIJ3	Predicted protein OS=Hordeum vulgare subsp. vulgare OX=112509 PE=2 SV=1	High				Pf00011																			F2EIJ3	0	0	0	0	0	0	0	0	0	0	0	0	0	0	0	0	0	0	0	0	0	0	0	0
A0A287JSY9	Thioredoxin domain-containing protein OS=Hordeum vulgare subsp. vulgare OX=112509 PE=4 SV=1	High					0.276695	-0.475895	0.438835	0.236143	0.460087	0.161635	0.20351	-0.175478	-0.180422	0.0641105	-0.178913	-0.0760438	-1.76599	-0.0833548	-0.160315	-0.916049	-0.352315	-1.41784	A0A287JSY9	0	0	0	0	0	0	0	0	0	0	0	0	-1	0	0	0	0	0	1	0	0	1	1	0
A0A287TF25	Histone H2B OS=Hordeum vulgare subsp. vulgare OX=112509 PE=3 SV=1	High					-0.52889	-0.224432	1.34292	0.442131	-0.55787	0.684637	-0.0197059	-0.0585039	0.659728	-0.882525	-0.641711	0.237057	0.200123	0.24327	-0.825174	0.0876306	0.0701944	-0.531894	A0A287TF25	0	0	0	0	0	0	0	0	0	0	0	0	0	0	0	0	0	0	0	0	0	0	0	0
M0VKT2	Uncharacterized protein OS=Hordeum vulgare subsp. vulgare OX=112509 PE=3 SV=1	High	metabolic process	cytoplasm	catalytic activity;metal ion binding	Pf00719	2.08752	1.00825	2.58408	-0.460631	-0.814814	-1.40761	0.720563	0.4224	0.742004	-1.606	-0.0442034	-0.413512	2.47652	1.79318	-0.876693	0.0559338	0.116688	-2.21958	M0VKT2	1	0	1	0	0	0	0	0	0	-1	0	0	1	1	0	0	0	-1	6	2	1	3	3	1
A0A287LZW0	Histone H3 OS=Hordeum vulgare subsp. vulgare OX=112509 PE=3 SV=1	High					2.35383	2.06024	2.36322	0.671918	-0.0436915	0.750226	0.422926	-0.352037	0.05979	-0.552488	-0.706479	0.515629	2.82517	1.23485	1.92796	1.12362	0.426619	0.7481	A0A287LZW0	1	1	1	0	0	0	0	0	0	0	0	0	1	0	1	0	0	0	5	3	0	2	2	1
A0A287PW00	Ubiquitin-like domain-containing protein OS=Hordeum vulgare subsp. vulgare OX=112509 PE=4 SV=1	High					-0.632836	-0.250178	-0.586587	-0.239525	1.61277	0.403722	0.105172	-0.349835	0.419434	0.442798	0.50926	0.704364	-0.712717	-0.789113	-0.392125	0.0600878	-0.873823	0.328033	A0A287PW00	0	0	0	0	1	0	0	0	0	0	0	0	0	0	0	0	0	0	1	1	0	0	0	1
A0A287W543	PfkB domain-containing protein OS=Hordeum vulgare subsp. vulgare OX=112509 PE=4 SV=1	High					0.792378	1.39454	2.12903	0.370808	1.70345	-0.165406	0.0244715	-0.0989496	-0.563542	0.0647257	0.435664	0.0342241	0.729139	-0.0500242		0.528804	0.915244	-0.902102	A0A287W543	0	0	1	0	1	0	0	0	0	0	0	0	0	0	0	0	0	0	2	2	0	0	0	1
F2D7S5	Predicted protein (Fragment) OS=Hordeum vulgare subsp. vulgare OX=112509 PE=2 SV=1	High		nucleus		Pf04037,Pf04046	0.688372	0.915461	0.650263	-0.0673469	0.779748	0.126094	0.492712	0.702048	0.823366	0.926096	0.677408	0.633536	-0.746662	-1.06316	0.0880642	0.928164	-0.263521	1.03444	F2D7S5	0	0	0	0	0	0	0	0	0	0	0	0	0	0	0	0	0	0	0	0	0	0	0	0
F2DC47	Glutamate decarboxylase OS=Hordeum vulgare subsp. vulgare OX=112509 PE=2 SV=1	High	metabolic process		catalytic activity	Pf00282	0.633001	0.0189124	1.01024	0.149615	0.686033	0.198793	0.807002	1.13644	1.18758	0.0531846	-0.667724	-0.0492813	-1.52554	-0.786101	-0.0424057				F2DC47	0	0	0	0	0	0	0	0	0	0	0	0	0	0	0	0	0	0	0	0	0	0	0	0
A0A287MS07	HP domain-containing protein OS=Hordeum vulgare subsp. vulgare OX=112509 PE=4 SV=1	High					-0.0531568	0.102958	-0.605442	-0.136229	0.57652	-0.693436	-0.706788	-1.05832	-0.532548	0.0802972	-0.415375	-0.143953	-0.690529	-0.626692	-0.0071815	0.425202	-0.928078	0.342589	A0A287MS07	0	0	0	0	0	0	0	0	0	0	0	0	0	0	0	0	0	0	0	0	0	0	0	0
F2EFA8	ATP synthase subunit beta OS=Hordeum vulgare subsp. vulgare OX=112509 PE=2 SV=1	High	metabolic process;transport		catalytic activity;nucleotide binding;transporter activity	Pf00006,Pf00306,Pf02874	-0.611037	-0.00525065	1.34406	-1.5884	-0.537327	-0.79297	0.0646345	-0.100163	0.487173	-1.36952	-0.6415	-0.761804	1.58583	0.0191656	-0.0467825	0.89361	1.57149	-1.16665	F2EFA8	0	0	0	0	0	0	0	0	0	0	0	0	0	0	0	0	0	0	0	0	0	0	0	0
F2DEL5	Predicted protein (Fragment) OS=Hordeum vulgare subsp. vulgare OX=112509 PE=2 SV=1	High	metabolic process;response to stimulus		metal ion binding;nucleotide binding;protein binding	Pf00226,Pf00684,Pf01556	-0.341325	-0.711331	0.0947942	0.318989	1.46101	0.799823	1.12353	0.370302	1.36571	1.45463	1.19098	2.63875	3.92056	3.3451	1.48997	1.62952	1.9768	2.35333	F2DEL5	0	0	0	0	0	0	0	0	0	0	0	1	1	1	0	1	1	1	6	0	1	5	2	2
A0A287FPH8	Uncharacterized protein OS=Hordeum vulgare subsp. vulgare OX=112509 PE=4 SV=1	High					-0.556948	-0.805266	-1.15017	0.426633	0.58855	0.751569	-0.168415	-0.460027	-0.176226	0.436574	0.643616	0.746176	-0.205811	0.0237168	0.198516	-0.866876	-1.3725	-0.194203	A0A287FPH8	0	0	0	0	0	0	0	0	0	0	0	0	0	0	0	0	0	0	0	0	0	0	0	0
F2DHV6	Predicted protein OS=Hordeum vulgare subsp. vulgare OX=112509 PE=2 SV=1	High				Pf04969	0.0463556	0.149183	-0.470806	0.691159	0.0895431	0.707325	0.320344	0.106703	0.469962	0.813678	0.449068	0.907115	0.134256	0.0745225	0.350833	0.124141	-0.127691	0.883024	F2DHV6	0	0	0	0	0	0	0	0	0	0	0	0	0	0	0	0	0	0	0	0	0	0	0	0
F2CY78	U6 snRNA-associated Sm-like protein LSm3 (Fragment) OS=Hordeum vulgare subsp. vulgare OX=112509 GN=LSM3 PE=2 SV=1	High	metabolic process			Pf01423																			F2CY78	0	0	0	0	0	0	0	0	0	0	0	0	0	0	0	0	0	0	0	0	0	0	0	0
A0A287LT80	Uncharacterized protein OS=Hordeum vulgare subsp. vulgare OX=112509 PE=4 SV=1	High					0.268129	-0.651405	-1.09352	1.31892	0.787009	0.759622	0.330671	-0.459522	-0.205302	1.28923	-1.09053	0.899194	1.48587	0.653487	1.09838	3.07409	0.842541	2.99367	A0A287LT80	0	0	0	0	0	0	0	0	0	0	0	0	0	0	0	1	0	1	2	0	0	2	1	0
A0A287Q5P4	Uncharacterized protein OS=Hordeum vulgare subsp. vulgare OX=112509 PE=4 SV=1	High					0.460546	0.780263	1.13987	-0.698295	1.56579	0.0626532	0.0465074	0.50892	0.243384	-0.198931	-0.2511	-0.752383		-2.06346		-0.4447	-1.7455	-1.51469	A0A287Q5P4	0	0	0	0	1	0	0	0	0	0	0	0	0	-1	0	0	-1	-1	4	1	0	3	0	3
A1E9S0	ATP synthase subunit b, chloroplastic OS=Sorghum bicolor OX=4558 GN=atpF PE=3 SV=1	High	metabolic process;transport	membrane	transporter activity	Pf00430																			A1E9S0	0	0	0	0	0	0	0	0	0	0	0	0	0	0	0	0	0	0	0	0	0	0	0	0
A0A287PMW3	Glutathione reductase OS=Hordeum vulgare subsp. vulgare OX=112509 PE=3 SV=1	High					0.0416616	-0.334251	-0.074823	-0.0844502	-0.843323	-0.0448544	0.293892	0.283691	0.0200383	-0.530148	-0.14674	-0.332946	0.611789	0.180975	-0.935132	0.830796	0.0599603	0.714402	A0A287PMW3	0	0	0	0	0	0	0	0	0	0	0	0	0	0	0	0	0	0	0	0	0	0	0	0
M0WSH7	Pectinesterase OS=Hordeum vulgare subsp. vulgare OX=112509 PE=4 SV=1	High	cell organization and biogenesis;metabolic process;regulation of biological process		catalytic activity;enzyme regulator activity	Pf01095,Pf04043	-0.369933	-0.172493	-1.35802	1.78221	0.495909	0.429582	-0.366738	0.00114319	0.0136096	0.44625	0.3612	0.575876	0.3996	0.346777	0.586962	0.700523	0.266392	0.818863	M0WSH7	0	0	0	1	0	0	0	0	0	0	0	0	0	0	0	0	0	0	1	1	0	0	1	0
Q42848	Non-specific lipid-transfer protein OS=Hordeum vulgare OX=4513 PE=2 SV=1	High	transport			Pf00234	0.0364112	0.238903	-0.276802	2.1225	0.18503	1.2917	-0.314904	-0.46471	-0.143408	1.41941	0.322945	2.48267	-0.469319	0.0752201	-0.366838	0.377044	-0.18018	2.36737	Q42848	0	0	0	1	0	0	0	0	0	0	0	1	0	0	0	0	0	1	3	1	1	1	1	0
A0A218LNH5	30S ribosomal protein S2, chloroplastic OS=Hordeum vulgare OX=4513 GN=rps2 PE=3 SV=1	High	metabolic process	ribosome	structural molecule activity	Pf00318	-0.155029	-0.472965	0.837082	-0.428888	-0.876249	0.274559	-1.03518	-0.958653	-1.1496	0.330196	1.19218	1.20333	-0.612836	-1.06171	-2.06226	-1.85908	-1.38144	-2.36839	A0A218LNH5	0	0	0	0	0	0	0	0	0	0	0	0	0	0	-1	-1	0	-1	3	0	0	3	1	0
F2CUI8	Predicted protein OS=Hordeum vulgare subsp. vulgare OX=112509 PE=2 SV=1	High	transport	membrane		Pf00153	-1.0283	0.783767	1.36863	0.00565443	-0.81844	-0.599052	1.06382	1.20512	0.700091	-2.29253	-0.940305	-1.15556	2.53853	2.45055	1.65248	1.43055	1.81738	-0.234067	F2CUI8	0	0	0	0	0	0	0	0	0	-1	0	0	1	1	1	0	1	0	5	0	1	4	2	2
F2D4R8	Predicted protein OS=Hordeum vulgare subsp. vulgare OX=112509 PE=2 SV=1	High			RNA binding	Pf00076,Pf13893,Pf14259	0.37986	-0.313122	-0.830334	-0.315402	0.29523	0.693359	-0.0611979	0.142839	-0.104275	0.522524	0.345722	1.0631	-0.818267	0.0492842	-1.03796	-0.433548	-1.14761	-1.00374	F2D4R8	0	0	0	0	0	0	0	0	0	0	0	0	0	0	0	0	0	0	0	0	0	0	0	0
F2DA85	Predicted protein OS=Hordeum vulgare subsp. vulgare OX=112509 PE=2 SV=1	High				Pf04499	0.018798	-0.140674	-0.393669	-0.561473	0.173001	-1.4077	-0.177906	-0.347844	0.0289159	-0.524262	0.0726311	-0.545787	-0.623373	-0.298816	-0.198354	-0.477973	-0.485533	-1.14861	F2DA85	0	0	0	0	0	0	0	0	0	0	0	0	0	0	0	0	0	0	0	0	0	0	0	0
A0A287UZC6	Deyhydrin 4 OS=Hordeum vulgare subsp. vulgare OX=112509 PE=3 SV=1	High																							A0A287UZC6	0	0	0	0	0	0	0	0	0	0	0	0	0	0	0	0	0	0	0	0	0	0	0	0
F2E397	Predicted protein OS=Hordeum vulgare subsp. vulgare OX=112509 PE=2 SV=1	High	metabolic process		catalytic activity	Pf00294	1.87311	2.65007	0.797409	1.38917	1.78094	-0.180912	1.32646	0.884645	0.66715	-1.50006	-0.271927	0.429521							F2E397	1	1	0	0	1	0	0	0	0	-1	0	0	0	0	0	0	0	0	4	3	1	0	2	2
F2CPW2	Predicted protein OS=Hordeum vulgare subsp. vulgare OX=112509 PE=2 SV=1	High					0.121225	0.0833062	-0.511054	-0.158761	0.301944	-0.91261	-0.0379861	-0.165152	0.164855	-0.26377	-0.643084	-1.01341	1.18344	1.63611	0.617093	1.43602	0.974249	1.13382	F2CPW2	0	0	0	0	0	0	0	0	0	0	0	0	0	1	0	0	0	0	1	0	0	1	0	1
F2DZN3	Predicted protein OS=Hordeum vulgare subsp. vulgare OX=112509 PE=2 SV=1	High	regulation of biological process			Pf05030	-0.196368	-0.0279578	-0.120857	-1.89285	-0.191909	-2.14065	-0.0682234	-0.468214	-0.0294633	-0.409614	-0.403674	-0.390575	1.38967	0.908979	1.6459	0.666504	1.31046	1.70813	F2DZN3	0	0	0	-1	0	-1	0	0	0	0	0	0	0	0	1	0	0	1	4	2	0	2	1	0
A0A287E4J1	Uncharacterized protein OS=Hordeum vulgare subsp. vulgare OX=112509 PE=4 SV=1	High					0.039778	-0.561396	-1.2424	0.59311	0.0197415	0.518518	0.701467	-1.00363	-0.46623	-0.062983	-0.643813	0.356545	1.24915	0.121334	-0.148549	0.300037	-1.48142	0.795167	A0A287E4J1	0	0	0	0	0	0	0	0	0	0	0	0	0	0	0	0	0	0	0	0	0	0	0	0
A0A287RZ89	UBX domain-containing protein OS=Hordeum vulgare subsp. vulgare OX=112509 PE=4 SV=1	High					-0.433607	0.859572	-0.431884	2.12593	0.844768	1.45489	0.765013	0.970716	0.129911	1.95878	0.360723	1.50913	0.114619	-0.415368	0.145563	1.03412	-0.0724597	2.27991	A0A287RZ89	0	0	0	1	0	0	0	0	0	1	0	1	0	0	0	0	0	1	4	1	2	1	2	0
A0A287ED16	Uncharacterized protein OS=Hordeum vulgare subsp. vulgare OX=112509 PE=4 SV=1	High					-0.322989	0.568655	1.08812	-0.478268	-0.473603	-0.0577239	-0.303921	-0.555867	-0.165853	-1.01338	-0.551785	-0.492985	1.4224	1.18702	1.01132	0.0929672	0.413965	-1.02555	A0A287ED16	0	0	0	0	0	0	0	0	0	0	0	0	0	0	0	0	0	0	0	0	0	0	0	0
A0A287GCP2	Uncharacterized protein OS=Hordeum vulgare subsp. vulgare OX=112509 PE=4 SV=1	High					-0.185853	0.293043	0.140435	1.6562	-0.176478	1.14551	0.607499	-0.355389	-0.297007	1.77482	-0.239874	1.29372	-0.405006	-1.22912	0.0372247	0.592778	0.704866	0.22841	A0A287GCP2	0	0	0	1	0	0	0	0	0	1	0	0	0	0	0	0	0	0	2	1	1	0	2	0
A0A287WVK2	Tryptophan synthase OS=Hordeum vulgare subsp. vulgare OX=112509 PE=3 SV=1	High					0.166443	-0.435138	-1.44415	0.660619	-0.0529033	0.495623	-0.089083	0.0878786	-0.119754	1.32044	1.04698	1.54595	-1.47774	-1.47309	-0.425915	0.731826	0.284098	0.30402	A0A287WVK2	0	0	0	0	0	0	0	0	0	0	0	1	0	0	0	0	0	0	1	0	1	0	0	0
F2DZF2	Predicted protein OS=Hordeum vulgare subsp. vulgare OX=112509 PE=2 SV=1	High				Pf04667	0.939647	1.53516	1.14514	-0.777074	0.198966	-0.650484	0.654251	0.541712	0.466241	0.5676	0.510322	-0.0102608	0.336053	1.02888	1.57573	0.976127	1.20713	1.88225	F2DZF2	0	1	0	0	0	0	0	0	0	0	0	0	0	0	1	0	0	1	3	1	0	2	0	1
A0A287R0T2	Uncharacterized protein OS=Hordeum vulgare subsp. vulgare OX=112509 PE=3 SV=1	High					-1.24986	-1.10882	1.6004	0.760491	0.218347	-0.145265	-0.112846	0.36065	-0.113905	-0.766746	-0.352593	-0.0844127	-1.34219	-1.06837	-1.77991	-1.40769	-1.1009	-2.07517	A0A287R0T2	0	0	1	0	0	0	0	0	0	0	0	0	0	0	-1	0	0	-1	3	1	0	2	0	0
P12940	Bowman-Birk type trypsin inhibitor OS=Hordeum vulgare OX=4513 GN=BBBI PE=1 SV=1	High	regulation of biological process	extracellular	enzyme regulator activity	Pf00228																			P12940	0	0	0	0	0	0	0	0	0	0	0	0	0	0	0	0	0	0	0	0	0	0	0	0
F2DNM7	Predicted protein OS=Hordeum vulgare subsp. vulgare OX=112509 PE=2 SV=1	High	metabolic process		catalytic activity	Pf00082,Pf02225,Pf05922	-0.0827938	-0.864455	-0.607431	-0.269656	-0.897565	-0.805078	-0.185929	-0.268565	-0.767365	-0.649334	-1.3061	-1.46549	-0.545173	-0.0821067	-0.226564	-1.72972	-1.74961	-2.08736	F2DNM7	0	0	0	0	0	0	0	0	0	0	0	0	0	0	0	-1	-1	-1	3	0	0	3	1	1
A0A287ILT4	14_3_3 domain-containing protein OS=Hordeum vulgare subsp. vulgare OX=112509 PE=3 SV=1	High																							A0A287ILT4	0	0	0	0	0	0	0	0	0	0	0	0	0	0	0	0	0	0	0	0	0	0	0	0
F2E4X0	Predicted protein OS=Hordeum vulgare subsp. vulgare OX=112509 PE=2 SV=1	High		membrane			0.30278	0.357786	0.114818	1.62321	0.742692	1.54596	-0.291073	0.662502	-0.365823	1.15791	0.793424	1.21265	-0.335892	-0.411056	-0.435927	-0.0519376	0.157737	0.431396	F2E4X0	0	0	0	1	0	1	0	0	0	0	0	0	0	0	0	0	0	0	2	2	0	0	1	0
F2DDC0	Predicted protein (Fragment) OS=Hordeum vulgare subsp. vulgare OX=112509 PE=2 SV=1	High	metabolic process	ribosome	structural molecule activity	Pf00828	0.598763	1.00823	1.22011	0.498962	0.59162	0.048902	0.381654	0.272116	0.575343	0.530871	0.0668713	0.888565	0.195132	0.303079	-0.504184	0.865648	0.0350759	1.12324	F2DDC0	0	0	0	0	0	0	0	0	0	0	0	0	0	0	0	0	0	0	0	0	0	0	0	0
A0A287XAB9	Uncharacterized protein OS=Hordeum vulgare subsp. vulgare OX=112509 PE=4 SV=1	High					-0.247824	0.921179	0.107625	0.497305	-0.36423	-0.360553	-0.0832848	0.311173	-0.318023	1.44913	0.415046	1.73153	-0.634729	-1.69439	0.096342	-2.05835		-0.256198	A0A287XAB9	0	0	0	0	0	0	0	0	0	0	0	1	0	-1	0	-1	0	0	3	0	1	2	1	1
M0Z828	Uncharacterized protein OS=Hordeum vulgare subsp. vulgare OX=112509 PE=4 SV=1	High			metal ion binding	Pf00036,Pf13202,Pf13405,Pf13499,Pf13833,Pf14658	1.41939	0.210877	0.680751	1.97526	0.517981	2.17366	1.03213	0.96739	1.36236	1.99711	1.25213	3.06583	2.27902		2.9057				M0Z828	0	0	0	1	0	1	0	0	0	1	0	1	1	0	1	0	0	0	6	2	2	2	3	0
A0A287SR19	40S ribosomal protein S26 OS=Hordeum vulgare subsp. vulgare OX=112509 PE=3 SV=1	High					0.329122	-0.35615	-0.240209	1.37039	0.365364	0.831919	0.100171	-0.133779	-1.85657	0.573459	-0.068762	0.0835642	-0.978745	-2.27716	-0.553289	-0.0364559	0.0428189	0.670231	A0A287SR19	0	0	0	0	0	0	0	0	-1	0	0	0	0	-1	0	0	0	0	2	0	1	1	0	1
F2D1G5	Predicted protein OS=Hordeum vulgare subsp. vulgare OX=112509 PE=2 SV=1	High			RNA binding	Pf00076,Pf13893,Pf14259	-0.276982	-0.49565	-0.740752	0.198289	0.186882	0.220763	-0.413373	-0.500608	-0.0600256	0.100996	-0.258852	0.830621	-0.947649	-0.596716	-0.864433	-0.852791	-1.23141	-0.591352	F2D1G5	0	0	0	0	0	0	0	0	0	0	0	0	0	0	0	0	0	0	0	0	0	0	0	0
A0A287L785	Malate dehydrogenase OS=Hordeum vulgare subsp. vulgare OX=112509 PE=3 SV=1	High																							A0A287L785	0	0	0	0	0	0	0	0	0	0	0	0	0	0	0	0	0	0	0	0	0	0	0	0
A0A287KD19	SHSP domain-containing protein OS=Hordeum vulgare subsp. vulgare OX=112509 PE=3 SV=1	High																							A0A287KD19	0	0	0	0	0	0	0	0	0	0	0	0	0	0	0	0	0	0	0	0	0	0	0	0
A0A287F007	VOC domain-containing protein OS=Hordeum vulgare subsp. vulgare OX=112509 PE=4 SV=1	High					-0.673041	-0.189764	0.072149	-2.14556	0.437321	-1.49918	-0.110774	0.455772	-0.137241	-1.45236	0.632267	-1.36638	-1.36885	-0.370835	-0.963517	-0.82907	-0.548103	-1.64377	A0A287F007	0	0	0	-1	0	0	0	0	0	0	0	0	0	0	0	0	0	-1	2	1	0	1	1	0
F2CPP0	Predicted protein OS=Hordeum vulgare subsp. vulgare OX=112509 PE=2 SV=1	High	metabolic process		catalytic activity	Pf00702,Pf13242,Pf13419,Pf14569,Pf14570	-0.596845	0.0148046	0.207858	0.669203	0.682358	0.419917	0.174961	0.252974	-0.082415	-1.23286	-0.368583	-0.769933	0.853632	-0.954038	0.203082	0.949835	1.40337	-0.695507	F2CPP0	0	0	0	0	0	0	0	0	0	0	0	0	0	0	0	0	0	0	0	0	0	0	0	0
M0VY36	Uncharacterized protein OS=Hordeum vulgare subsp. vulgare OX=112509 PE=4 SV=1	High				Pf11460				1.4466	0.827438	1.0192	0.583511	0.826552	0.123338	1.0063	0.930745	1.30125				0.243331	0.491417	0.963883	M0VY36	0	0	0	0	0	0	0	0	0	0	0	0	0	0	0	0	0	0	0	0	0	0	0	0
F2E785	Predicted protein OS=Hordeum vulgare subsp. vulgare OX=112509 PE=2 SV=1	High			protein binding	Pf00400,Pf09731	-0.0136436	-0.627481	-0.909745	1.79449	1.31435	1.51491	0.665019	-0.0998128	0.669126	1.42434	0.147966	1.37573	-0.87843	-2.10087	-0.0719453	-0.0240969	-1.17078	0.132771	F2E785	0	0	0	1	0	1	0	0	0	0	0	0	0	-1	0	0	0	0	3	2	0	1	1	1
A0A287LIV0	Reticulon-like protein OS=Hordeum vulgare subsp. vulgare OX=112509 PE=4 SV=1	High					0.793864	0.182677	-0.466526	0.886134	0.789286	1.25006	0.660963	-0.0846646	0.607098	0.616264	0.30262	0.951216	-0.468341	0.0350996	-0.282466	-0.0420695	-1.15054	0.0186524	A0A287LIV0	0	0	0	0	0	0	0	0	0	0	0	0	0	0	0	0	0	0	0	0	0	0	0	0
F2CZW3	Predicted protein OS=Hordeum vulgare subsp. vulgare OX=112509 PE=2 SV=1	High				Pf01187	-0.0365882	0.15706	0.146089	0.314378	-0.381178	0.162163	0.0463333	0.266957	-0.103077	0.185657	-0.022504	0.612136							F2CZW3	0	0	0	0	0	0	0	0	0	0	0	0	0	0	0	0	0	0	0	0	0	0	0	0
F2CQY9	Predicted protein OS=Hordeum vulgare subsp. vulgare OX=112509 PE=2 SV=1	High																							F2CQY9	0	0	0	0	0	0	0	0	0	0	0	0	0	0	0	0	0	0	0	0	0	0	0	0
A0A287RSX4	Uncharacterized protein OS=Hordeum vulgare subsp. vulgare OX=112509 PE=4 SV=1	High					-0.272977	-0.103779	0.492775	0.0786403	-0.0358467	0.103695	0.295077	-0.0568832	0.344465	-0.127553	0.140122	0.348915	0.616442	0.221235	-0.0711717	0.0374353	0.106953	-0.530921	A0A287RSX4	0	0	0	0	0	0	0	0	0	0	0	0	0	0	0	0	0	0	0	0	0	0	0	0
F2E8Q3	Histone H2A OS=Hordeum vulgare subsp. vulgare OX=112509 PE=2 SV=1	High		chromosome;nucleus	DNA binding;protein binding	Pf00125				0.384177	0.479064	-1.91759	0.494314	-0.581051	0.165886	-0.248482	1.51244	0.977642				1.59001	2.13953	0.835668	F2E8Q3	0	0	0	0	0	-1	0	0	0	0	1	0	0	0	0	1	1	0	4	1	1	2	1	2
A0A287WV12	Dihydrolipoamide acetyltransferase component of pyruvate dehydrogenase complex OS=Hordeum vulgare subsp. vulgare OX=112509 PE=3 SV=1	High					-0.195469	-0.511269	0.100532	0.334263	0.342674	0.624508	0.0687869	0.406047	-0.410488	0.591942	0.598378	0.0055552	-2.92913	-0.890241	-0.183089	-2.51687	-3.16147	-1.94337	A0A287WV12	0	0	0	0	0	0	0	0	0	0	0	0	-1	0	0	-1	-1	-1	4	0	0	4	2	1
A0A287M875	Uncharacterized protein OS=Hordeum vulgare subsp. vulgare OX=112509 PE=4 SV=1	High					1.77312	2.02665	2.6925	0.81804	0.544847	0.900989	0.389434	0.976013	0.713003	-0.184797	0.310317	0.587109	0.361816	-0.0289866	-0.108116	-0.68028	0.803297	-0.363519	A0A287M875	1	1	1	0	0	0	0	0	0	0	0	0	0	0	0	0	0	0	3	3	0	0	1	1
F2E4E7	Predicted protein OS=Hordeum vulgare subsp. vulgare OX=112509 PE=2 SV=1	High				Pf07063																			F2E4E7	0	0	0	0	0	0	0	0	0	0	0	0	0	0	0	0	0	0	0	0	0	0	0	0
F2DDV8	Glycine cleavage system H protein OS=Hordeum vulgare subsp. vulgare OX=112509 PE=2 SV=1	High	metabolic process	mitochondrion		Pf01597	-1.48115	-1.14441	-1.3076	0.496882	0.407876	0.13218	-1.09305	-1.09632	-1.20219	-0.0853918	-0.786503	-1.21195	-1.93103	-1.21278	-0.00303286	-1.17082	-0.82658	-1.44033	F2DDV8	0	0	0	0	0	0	0	0	0	0	0	0	-1	0	0	0	0	0	1	0	0	1	1	0
A0A287SBF4	Histone H2A OS=Hordeum vulgare subsp. vulgare OX=112509 PE=3 SV=1	High					1.05325	1.38607	1.12693	0.657693	0.793426	0.881451	0.508064	0.707551	0.740912	-0.214012	0.378474	0.349963	0.950166	-0.61946	-0.620912	-0.478626	-0.309027	-0.0187363	A0A287SBF4	0	0	0	0	0	0	0	0	0	0	0	0	0	0	0	0	0	0	0	0	0	0	0	0
F2CXV4	Predicted protein (Fragment) OS=Hordeum vulgare subsp. vulgare OX=112509 PE=2 SV=1	High	metabolic process;transport		catalytic activity;DNA binding;motor activity;nucleotide binding;transporter activity	Pf00521,Pf01496,Pf01576,Pf04582,Pf12128,Pf13166	-0.269731	-0.473759	-1.79517	-0.507945	-0.0560214	-0.35545	-0.644247	-0.429762	-0.448638	-0.218572	-0.320859	-0.62072	-0.236631	-0.516108	-0.354945	-0.717617	-0.908722	-0.627264	F2CXV4	0	0	-1	0	0	0	0	0	0	0	0	0	0	0	0	0	0	0	1	1	0	0	0	0
F2D8K0	Predicted protein OS=Hordeum vulgare subsp. vulgare OX=112509 PE=2 SV=1	High					0.130472	0.393161	-0.360289	-0.0778397	0.579185	-0.552961	-0.111542	-0.291877	-0.638106	-0.284005	0.626609	-0.605264	-0.88023	-1.12421	-0.203936	0.129509	-0.203131	0.525441	F2D8K0	0	0	0	0	0	0	0	0	0	0	0	0	0	0	0	0	0	0	0	0	0	0	0	0
A0A287UZD1	Dehydrin 7 OS=Hordeum vulgare subsp. vulgare OX=112509 PE=3 SV=1	High																							A0A287UZD1	0	0	0	0	0	0	0	0	0	0	0	0	0	0	0	0	0	0	0	0	0	0	0	0
P08772	Leaf-specific thionin DB4 OS=Hordeum vulgare OX=4513 GN=THI1.3 PE=2 SV=2	High	defense response;response to stimulus	extracellular		Pf00321																			P08772	0	0	0	0	0	0	0	0	0	0	0	0	0	0	0	0	0	0	0	0	0	0	0	0
A0A287MC57	Ubiquitin-like domain-containing protein OS=Hordeum vulgare subsp. vulgare OX=112509 PE=4 SV=1	High					-0.00280618	0.407088	0.0488365	0.569155	-0.0736788	0.318683	0.184692	0.0772538	0.406509	1.09742	-0.0552495	0.936228	-1.07043	-0.450703	-0.521363	-0.118682	-0.733785	0.612289	A0A287MC57	0	0	0	0	0	0	0	0	0	0	0	0	0	0	0	0	0	0	0	0	0	0	0	0
A0A287T476	Uncharacterized protein OS=Hordeum vulgare subsp. vulgare OX=112509 PE=4 SV=1	High					0.315414	1.58417	0.799501	0.761994	-0.665792	-1.51126	-0.243717	0.0584203	-0.0452215	1.65037	0.912983	0.134645	1.72234	0.729346	-0.59414	1.47153	-2.39044	4.33678	A0A287T476	0	1	0	0	0	-1	0	0	0	1	0	0	1	0	0	0	-1	1	6	2	1	3	2	2
A0A287LWN7	Uncharacterized protein OS=Hordeum vulgare subsp. vulgare OX=112509 PE=4 SV=1	High					-0.158293	-0.230315	-0.365451	0.904177	0.538643	0.928179	0.45751	0.528926	0.560052	1.03971	0.624325	0.960694	-0.348192	-0.265725	-0.227026	-0.301711	-0.327528	-0.531905	A0A287LWN7	0	0	0	0	0	0	0	0	0	0	0	0	0	0	0	0	0	0	0	0	0	0	0	0
A0A2R9IRE8	Uncharacterized protein OS=Hordeum vulgare subsp. vulgare OX=112509 PE=4 SV=1	High					0.165558	-1.24211	-0.974559	-0.660315	-1.48035	-1.11934	0.786119	0.00924391	0.432761	0.752861	0.276826	0.62212	-0.394522	0.0437972	-0.252045	1.09528	2.3204	0.12209	A0A2R9IRE8	0	0	0	0	0	0	0	0	0	0	0	0	0	0	0	0	1	0	1	0	0	1	0	1
A0A287HPE1	Uncharacterized protein OS=Hordeum vulgare subsp. vulgare OX=112509 PE=4 SV=1	High					0.465065	-0.217988	-0.286517	1.48199	0.0533897	1.41265	0.190394	-0.159415	-0.0214388	1.30186	0.46221	1.37029	0.194198	0.335701	1.16805	0.195871	0.00126092	1.19605	A0A287HPE1	0	0	0	0	0	0	0	0	0	0	0	0	0	0	0	0	0	0	0	0	0	0	0	0
A0A287LL06	Uncharacterized protein OS=Hordeum vulgare subsp. vulgare OX=112509 PE=3 SV=1	High					-0.744125	-0.480691	0.632339	-1.14066	-0.999649	-0.937963	-0.387445	-0.449809	-0.171334	-1.57889	-0.403654	-0.675371	1.57437	0.934416	-0.0650166	0.781358	1.02788	-0.0846159	A0A287LL06	0	0	0	0	0	0	0	0	0	-1	0	0	1	0	0	0	0	0	2	0	1	1	2	0
F2DMS9	Predicted protein OS=Hordeum vulgare subsp. vulgare OX=112509 PE=2 SV=1	High	transport	membrane	transporter activity	Pf00230	-0.0636678	0.504999	1.57866	0.861485	1.73228	0.300931	0.202533	0.487172	-0.170603	-0.15113	-0.54538	-1.07145	2.4139	0.416963	1.17396				F2DMS9	0	0	1	0	1	0	0	0	0	0	0	0	1	0	0	0	0	0	3	2	0	1	1	1
A0A287QUE3	KH type-2 domain-containing protein OS=Hordeum vulgare subsp. vulgare OX=112509 PE=3 SV=1	High					0.954715	0.998725	1.1614	0.373403	-0.110483	1.99281	0.355056	0.0658293	0.209917	-1.00114	-0.508691	0.187232	1.30106	0.943907	0.499913	-1.31853	0.482781	-0.987367	A0A287QUE3	0	0	0	0	0	1	0	0	0	0	0	0	0	0	0	0	0	0	1	1	0	0	0	0
F2CVC1	Predicted protein OS=Hordeum vulgare subsp. vulgare OX=112509 PE=2 SV=1	High	metabolic process		catalytic activity	Pf00293	-0.00317436	0.640433	1.19168	0.223963	1.10307	0.846549	1.12655	1.37699	0.806292	-0.483075	1.08256	0.165865	1.75733	1.77345	-0.194629	1.77307	2.04435	1.33325	F2CVC1	0	0	0	0	0	0	0	0	0	0	0	0	1	1	0	1	1	0	4	0	0	4	2	2
A0A287MPY9	Ubiquitin-fold modifier 1 OS=Hordeum vulgare subsp. vulgare OX=112509 PE=3 SV=1	High					0.374263	0.32569	-0.1723	0.660152	-0.236737	0.102968	0.496925	-0.262088	0.428477	1.16485	-0.0160749	1.08173	-0.667331	-0.606067	0.0703727	-0.141393	-0.477434	0.802843	A0A287MPY9	0	0	0	0	0	0	0	0	0	0	0	0	0	0	0	0	0	0	0	0	0	0	0	0
Q9M3N4	Putative kinetochore protein (Fragment) OS=Hordeum vulgare OX=4513 GN=skp1-2 PE=2 SV=1	High	metabolic process			Pf01466,Pf03931																			Q9M3N4	0	0	0	0	0	0	0	0	0	0	0	0	0	0	0	0	0	0	0	0	0	0	0	0
A0A287R0R3	Alpha-L-AF_C domain-containing protein OS=Hordeum vulgare subsp. vulgare OX=112509 PE=4 SV=1	High					-0.234379	-0.42979	-0.715285	0.392176	0.161282	0.25807	0.404963	0.0568384	0.172574	0.948815	0.0447501	-0.000385155	-0.0448323	-0.241814	-0.0685142				A0A287R0R3	0	0	0	0	0	0	0	0	0	0	0	0	0	0	0	0	0	0	0	0	0	0	0	0
F2EGQ9	Predicted protein OS=Hordeum vulgare subsp. vulgare OX=112509 PE=2 SV=1	High					1.22128	0.425608	1.58167	0.592519	-0.138162	0.233044	-0.280384	-0.623637	0.402796	0.642388	0.463041	1.0051	0.0685294	0.945165	-1.43784	1.27928	0.0765483	0.867919	F2EGQ9	0	0	1	0	0	0	0	0	0	0	0	0	0	0	0	0	0	0	1	1	0	0	0	0
F2ELE6	Glutathione reductase OS=Hordeum vulgare subsp. vulgare OX=112509 PE=2 SV=1	High	cellular homeostasis;metabolic process;regulation of biological process		antioxidant activity;catalytic activity;nucleotide binding	Pf00070,Pf02852,Pf03486,Pf07992,Pf13434																			F2ELE6	0	0	0	0	0	0	0	0	0	0	0	0	0	0	0	0	0	0	0	0	0	0	0	0
A0A287Y2C2	Uncharacterized protein OS=Hordeum vulgare subsp. vulgare OX=112509 PE=4 SV=1	High					-1.2931	-0.325035	0.406623	-0.346017	-0.77655	-1.36707	0.941459	0.966529	0.807673	-2.07176	-0.817461	-0.899713	2.33119	1.0734	-0.0606202	0.447373	0.61873	-1.13232	A0A287Y2C2	0	0	0	0	0	0	0	0	0	-1	0	0	1	0	0	0	0	0	2	0	1	1	2	0
F2CXU0	Predicted protein OS=Hordeum vulgare subsp. vulgare OX=112509 PE=2 SV=1	High	metabolic process		protein binding;RNA binding	Pf00240,Pf01805,Pf12230	0.538178	0.322382	-0.615947	1.1069	0.796149	1.03648	-0.233987	0.0451281	0.126993	0.721063	0.32418	1.05692	-2.17469	-0.567999	-1.30488	0.8528	-0.602651	0.558372	F2CXU0	0	0	0	0	0	0	0	0	0	0	0	0	-1	0	0	0	0	0	1	0	0	1	1	0
M0UM98	Uncharacterized protein OS=Hordeum vulgare subsp. vulgare OX=112509 PE=3 SV=1	High	defense response;metabolic process;response to stimulus	extracellular	catalytic activity	Pf01379,Pf03900																			M0UM98	0	0	0	0	0	0	0	0	0	0	0	0	0	0	0	0	0	0	0	0	0	0	0	0
F2D6N2	Predicted protein OS=Hordeum vulgare subsp. vulgare OX=112509 PE=2 SV=1	High			nucleotide binding	Pf00012,Pf02801																			F2D6N2	0	0	0	0	0	0	0	0	0	0	0	0	0	0	0	0	0	0	0	0	0	0	0	0
A0A287QMC7	BAT2_N domain-containing protein OS=Hordeum vulgare subsp. vulgare OX=112509 PE=4 SV=1	High					0.777274	-0.667576	0.0904871	0.581487	-0.0565129	-0.0980046	1.53969	0.224032	1.52285	1.11571	0.0769569	0.725215	-4.23313	0.0152369	0.148112	-0.22599	-0.0531674	0.549704	A0A287QMC7	0	0	0	0	0	0	1	0	1	0	0	0	-1	0	0	0	0	0	3	0	2	1	2	0
A0A287JEY2	Serine hydroxymethyltransferase OS=Hordeum vulgare subsp. vulgare OX=112509 PE=3 SV=1	High					-0.102814	2.02133	1.81833	1.46655		-0.418859	0.768024	0.49498	0.907889	-0.444702	2.17707	1.18565	0.993176	1.28261	-0.939725	1.88529	0.868147	1.04831	A0A287JEY2	0	1	1	0	0	0	0	0	0	0	1	0	0	0	0	1	0	0	4	2	1	1	1	2
A0A287VV58	Ribosomal_S10 domain-containing protein OS=Hordeum vulgare subsp. vulgare OX=112509 PE=3 SV=1	High					-0.154686	0.160401	-0.146393	0.878755	0.1059	0.745363	-0.440078	-0.0739074	-0.590991	0.193735	0.208581	0.359112	-0.247173	-0.428132	0.108797	0.0202569	-0.157606	0.378672	A0A287VV58	0	0	0	0	0	0	0	0	0	0	0	0	0	0	0	0	0	0	0	0	0	0	0	0
A0A287I4A9	ML domain-containing protein OS=Hordeum vulgare subsp. vulgare OX=112509 PE=4 SV=1	High					0.793344	0.969539	0.912924	3.30657	0.628659	3.16542	0.386849	-0.00131715	0.608529	1.85368	0.714548	3.22422	0.76141	0.0525341	0.0671348	0.74707	0.928205	2.76598	A0A287I4A9	0	0	0	1	0	1	0	0	0	1	0	1	0	0	0	0	0	1	5	2	2	1	2	0
F2E5E5	Predicted protein OS=Hordeum vulgare subsp. vulgare OX=112509 PE=2 SV=1	High				Pf10539	-0.0629619	-0.0887322	-0.868322	0.0921646	0.382871	0.226425	-0.165502	-0.31294	0.039458	0.0171955	0.0370961	-0.208218	-0.0909066	-0.432429	0.0198001	-0.622355	-0.81719	0.16635	F2E5E5	0	0	0	0	0	0	0	0	0	0	0	0	0	0	0	0	0	0	0	0	0	0	0	0
F2CZ65	Predicted protein OS=Hordeum vulgare subsp. vulgare OX=112509 PE=2 SV=1	High	metabolic process	ribosome	structural molecule activity	Pf01778	0.910783	0.886768	0.297191	-0.381865	0.502301	-1.83421	0.499215	0.0463116	0.423812	0.162656	-0.384425	0.112749	0.672117	0.0184227	0.247715	0.652142	-0.0112118	1.38221	F2CZ65	0	0	0	0	0	-1	0	0	0	0	0	0	0	0	0	0	0	0	1	1	0	0	0	0
A0A287U4Y9	Tr-type G domain-containing protein OS=Hordeum vulgare subsp. vulgare OX=112509 PE=4 SV=1	High					-0.0272844	-0.279341	-0.313287	-1.15407	0.212127	-1.05662	-0.384106	0.437875	-0.343664	-0.913889	0.0576118	-1.04099	-0.0356142	-0.345834	-0.144832	0.00980637	0.20906	-0.262489	A0A287U4Y9	0	0	0	0	0	0	0	0	0	0	0	0	0	0	0	0	0	0	0	0	0	0	0	0
F2CQ36	Predicted protein OS=Hordeum vulgare subsp. vulgare OX=112509 PE=2 SV=1	High		membrane	protein binding	Pf05553,Pf14364	-0.514832	-1.61454	-0.70811	0.13462	0.653389	0.410736	-0.0794274	0.533682	0.688953	0.375047	0.119282	0.985607	0.400341	0.169252	0.286772	-0.796808	-0.784764	-0.0617583	F2CQ36	0	-1	0	0	0	0	0	0	0	0	0	0	0	0	0	0	0	0	1	1	0	0	0	1
A0A287SCF2	Uncharacterized protein OS=Hordeum vulgare subsp. vulgare OX=112509 PE=4 SV=1	High					0.362968	1.31324	0.887159	1.48264	0.675255	0.974152	-0.241622	0.897973	0.183675	0.778526	0.0479697	1.17611	-0.711802	-0.185072	0.727827	0.774144	-0.581224	0.450996	A0A287SCF2	0	0	0	0	0	0	0	0	0	0	0	0	0	0	0	0	0	0	0	0	0	0	0	0
A8CCK8	Glutathione reductase OS=Hordeum vulgare OX=4513 GN=HvGR2 PE=2 SV=1	High	cellular homeostasis;metabolic process;regulation of biological process		antioxidant activity;catalytic activity;nucleotide binding	Pf00070,Pf02852,Pf03486,Pf07992,Pf13434	0.870317	0.234819	0.472478	0.863614	0.505172	-0.169375	0.30278	0.0171738	0.456357	0.137569	0.624141	1.60767	0.0510511	0.00249639	-0.712112	0.256759	-1.75842	-2.18475	A8CCK8	0	0	0	0	0	0	0	0	0	0	0	1	0	0	0	0	-1	-1	3	0	1	2	0	1
A0A287MYU3	Uncharacterized protein OS=Hordeum vulgare subsp. vulgare OX=112509 PE=3 SV=1	High					-0.455052	-0.123113	-0.034096	-1.99452	0.399652	-0.771735	-0.351999	-0.27885	-0.680707	-1.26006	0.110371	-0.139071	0.941626	-0.138261	-0.381452	0.254629	-0.313171	-1.40854	A0A287MYU3	0	0	0	-1	0	0	0	0	0	0	0	0	0	0	0	0	0	0	1	1	0	0	1	0
A0A287HTR4	Usp domain-containing protein OS=Hordeum vulgare subsp. vulgare OX=112509 PE=4 SV=1	High					0.159628		0.439528	2.64674	2.86218	4.01561	-0.338009	-0.32004	0.510212	1.84103	0.460267	3.64519				0.863172	0.539428	2.34893	A0A287HTR4	0	0	0	1	1	1	0	0	0	1	0	1	0	0	0	0	0	1	6	3	2	1	2	1
A0A287KC10	Uncharacterized protein OS=Hordeum vulgare subsp. vulgare OX=112509 PE=4 SV=1	High																							A0A287KC10	0	0	0	0	0	0	0	0	0	0	0	0	0	0	0	0	0	0	0	0	0	0	0	0
F2DFW6	Predicted protein OS=Hordeum vulgare subsp. vulgare OX=112509 PE=2 SV=1	High		Golgi	protein binding	Pf00564,Pf12895,Pf13414,Pf15015	-1.05515	-0.512648	-1.71933	-0.147138	-0.574842	-0.145653	-0.0887156	0.156441	-0.194353	0.753358	-0.335308	1.17418			-0.641835	-1.20582	-1.93266	-1.59552	F2DFW6	0	0	-1	0	0	0	0	0	0	0	0	0	0	0	0	0	-1	-1	3	1	0	2	0	1
A0A287Q4P7	Uncharacterized protein OS=Hordeum vulgare subsp. vulgare OX=112509 PE=4 SV=1	High					0.270668	1.17606	0.758872	-2.15422	-0.331583	-1.34384	-1.11083	-0.0271722	-0.5884	-1.2792	-0.0873406	-1.19039	1.73401	2.64303	1.78379				A0A287Q4P7	0	0	0	-1	0	0	0	0	0	0	0	0	1	1	1	0	0	0	4	1	0	3	2	1
F2CUZ1	Predicted protein OS=Hordeum vulgare subsp. vulgare OX=112509 PE=2 SV=1	High				Pf00466	-0.177949	0.835939	2.30148	-1.56841	-1.12248	-1.64888	0.080842	0.0192276	0.253789	-1.8191	-0.738409	-0.725889	2.66416	1.7274	-0.780686	1.67816	1.08702	-0.200323	F2CUZ1	0	0	1	-1	0	-1	0	0	0	-1	0	0	1	1	0	1	0	0	7	3	1	3	4	1
A0A287G758	Delta-1-pyrroline-5-carboxylate synthase OS=Hordeum vulgare subsp. vulgare OX=112509 PE=3 SV=1	High																							A0A287G758	0	0	0	0	0	0	0	0	0	0	0	0	0	0	0	0	0	0	0	0	0	0	0	0
A0A287J6P3	Uncharacterized protein OS=Hordeum vulgare subsp. vulgare OX=112509 PE=4 SV=1	High					-0.0577279	-0.358009	-0.31739	0.581958	0.444388	-0.0527374	0.0492404	-0.175368	-0.363092	0.435828	0.0299857	0.429246	0.0700853	-0.66726	0.00694184	-0.459123	-0.228954	0.319915	A0A287J6P3	0	0	0	0	0	0	0	0	0	0	0	0	0	0	0	0	0	0	0	0	0	0	0	0
A0A287QQN0	Uncharacterized protein OS=Hordeum vulgare subsp. vulgare OX=112509 PE=4 SV=1	High					-0.164334	-0.561185	-0.130174	-0.415123	-0.872634	-1.69368	-0.416733	-0.0591075	-0.560917	0.352169	0.172911	-0.693127	-1.26716	-0.707823	-0.451951	-0.664847	-1.47565	-1.76768	A0A287QQN0	0	0	0	0	0	-1	0	0	0	0	0	0	0	0	0	0	0	-1	2	1	0	1	0	0
A0A4Y5SG41	Translation initiation factor IF-1, chloroplastic OS=Hordeum vulgare subsp. spontaneum OX=77009 GN=infA PE=3 SV=1	High					0.930901	0.476084	-1.1665	-0.295044	0.346512	0.361273	-0.308056	-0.0185116	-0.445302	-0.402401	-0.307964	-0.28044	0.199953	-0.269762	-0.651372	-1.13529	-1.31731	-0.593041	A0A4Y5SG41	0	0	0	0	0	0	0	0	0	0	0	0	0	0	0	0	0	0	0	0	0	0	0	0
F2D074	Predicted protein OS=Hordeum vulgare subsp. vulgare OX=112509 PE=2 SV=1	High				Pf12481,Pf13522,Pf13537	-0.943798	0.011806	1.74427	0.549639	0.154108	0.522457	0.984505	1.58738	1.69727	0.112925	0.670644	1.2155	1.47039	1.93868	1.38177	-0.0277692	-0.124026	-0.824825	F2D074	0	0	1	0	0	0	0	1	1	0	0	0	0	1	0	0	0	0	4	1	2	1	0	2
F2E1R5	Predicted protein OS=Hordeum vulgare subsp. vulgare OX=112509 PE=2 SV=1	High					0.209974	0.155484	-0.357762	0.437181	0.712663	0.142639	1.53522	0.425323	1.50482	0.0619381	0.103033	0.0611255	0.460142	-0.796584	-0.0290814	-0.959214	-0.0114658	0.14772	F2E1R5	0	0	0	0	0	0	1	0	1	0	0	0	0	0	0	0	0	0	2	0	2	0	1	0
F2EFR1	40S ribosomal protein S6 OS=Hordeum vulgare subsp. vulgare OX=112509 PE=2 SV=1	High	metabolic process	ribosome	structural molecule activity	Pf01092	-0.681546	0.198133	0.103827	0.133341	0.4281	0.110305	0.0898863	0.331173	0.0235976	0.211436	0.489879	0.125922	0.506315	-0.0686336	-0.000847582	-0.0279289	0.109426	-0.141069	F2EFR1	0	0	0	0	0	0	0	0	0	0	0	0	0	0	0	0	0	0	0	0	0	0	0	0
A0A287LG24	SurE domain-containing protein OS=Hordeum vulgare subsp. vulgare OX=112509 PE=4 SV=1	High					-0.313239	-0.699973	-1.43473	-0.00735445	-0.15305	-0.367116	-0.410829	-0.524682	-0.657188	-0.642894	-0.403864	-0.199733	-0.11564	-0.772189	-0.285117	-0.266438	-0.0603534	-0.36777	A0A287LG24	0	0	0	0	0	0	0	0	0	0	0	0	0	0	0	0	0	0	0	0	0	0	0	0
F2CRA1	Predicted protein OS=Hordeum vulgare subsp. vulgare OX=112509 PE=2 SV=1	High			protein binding	Pf01302,Pf14560	0.512568	0.606712	-0.293938	0.13381	0.555398	0.453229	-0.66413	0.497372	-0.113745	0.0835007	0.805451	1.11044	-0.563652	-1.89165	-1.7975		0.684637	2.57349	F2CRA1	0	0	0	0	0	0	0	0	0	0	0	0	0	-1	-1	0	0	1	3	0	0	3	0	1
A0A287PF49	Uncharacterized protein OS=Hordeum vulgare subsp. vulgare OX=112509 PE=4 SV=1	High																							A0A287PF49	0	0	0	0	0	0	0	0	0	0	0	0	0	0	0	0	0	0	0	0	0	0	0	0
F2D1I2	Predicted protein OS=Hordeum vulgare subsp. vulgare OX=112509 PE=2 SV=1	High				Pf14368																			F2D1I2	0	0	0	0	0	0	0	0	0	0	0	0	0	0	0	0	0	0	0	0	0	0	0	0
A0A287IX56	C2 domain-containing protein OS=Hordeum vulgare subsp. vulgare OX=112509 PE=4 SV=1	High					0.156686	-0.363434	-0.349485	0.457774	0.396425	0.301501	-0.220496	-0.0433901	-0.54458	0.0313829	0.413258	-0.172125	-2.18908	-1.02329	-0.795079	-0.0751623	-0.718848	-0.927961	A0A287IX56	0	0	0	0	0	0	0	0	0	0	0	0	-1	0	0	0	0	0	1	0	0	1	1	0
A0A287KPM8	C2 domain-containing protein OS=Hordeum vulgare subsp. vulgare OX=112509 PE=4 SV=1	High																							A0A287KPM8	0	0	0	0	0	0	0	0	0	0	0	0	0	0	0	0	0	0	0	0	0	0	0	0
F2CSV3	Predicted protein OS=Hordeum vulgare subsp. vulgare OX=112509 PE=2 SV=1	High				Pf04398	-0.390302	0.48264	-0.160584	1.05979	-1.55247	0.68039	-0.992629	-0.924172	-0.425418	-0.245808	-0.962382	1.16249	-0.891205	-0.407509	-0.820791	-0.822916	-1.09	0.372506	F2CSV3	0	0	0	0	-1	0	0	0	0	0	0	0	0	0	0	0	0	0	1	1	0	0	0	1
F2D293	Predicted protein OS=Hordeum vulgare subsp. vulgare OX=112509 PE=2 SV=1	High	metabolic process	ribosome	structural molecule activity	Pf01778	0.485529	0.784367	0.329713	0.0130462	0.348025	-0.396964	0.258724	-0.568426	-0.136181	0.0524954	0.0468758	0.638319	-1.01447	-0.845757	-0.478681	-0.980775	-0.170841	0.651813	F2D293	0	0	0	0	0	0	0	0	0	0	0	0	0	0	0	0	0	0	0	0	0	0	0	0
A0A287SC65	YTH domain-containing protein OS=Hordeum vulgare subsp. vulgare OX=112509 PE=4 SV=1	High					1.23106	1.65879	0.912292	-0.495631	0.307485	-1.12693	-0.838291	0.0645125	0.579981	-0.120669	0.241554	-0.354768					-1.1622	1.17467	A0A287SC65	0	1	0	0	0	0	0	0	0	0	0	0	0	0	0	0	0	0	1	1	0	0	0	1
A0A287MDR8	GYF domain-containing protein OS=Hordeum vulgare subsp. vulgare OX=112509 PE=4 SV=1	High					-0.1725	-0.147284	-0.770656	-0.725071	-0.301238	-0.940044	-0.04249	-0.788385	-0.274163	0.0196621	-0.427097	-0.391249	-0.905826	-0.946004	-0.388757	-1.30444	-1.48446	-1.08993	A0A287MDR8	0	0	0	0	0	0	0	0	0	0	0	0	0	0	0	0	0	0	0	0	0	0	0	0
A0A287PVL0	Uncharacterized protein OS=Hordeum vulgare subsp. vulgare OX=112509 PE=4 SV=1	High					0.270191	1.04822	0.222099	0.927764	1.55492	0.747531	0.559685	0.76951	0.649992	0.72078	0.364741	0.501893	1.69418	1.05686	0.913092	0.393286	-0.0257562	1.17368	A0A287PVL0	0	0	0	0	1	0	0	0	0	0	0	0	1	0	0	0	0	0	2	1	0	1	1	1
F2DAR5	Purple acid phosphatase OS=Hordeum vulgare subsp. vulgare OX=112509 PE=2 SV=1	High	cell communication;metabolic process;response to stimulus	cytosol	catalytic activity;metal ion binding;protein binding	Pf00149,Pf14008	0.471057	0.0186095	0.0753301	0.589884	-0.207357	-0.561192	0.0135194	-0.375593	-0.608754	0.744425	-0.165731	-0.469666	-0.184621	-0.637029	0.00529829	-0.723477	-1.39921	-1.20579	F2DAR5	0	0	0	0	0	0	0	0	0	0	0	0	0	0	0	0	0	0	0	0	0	0	0	0
A0A287LTI6	DNA-(apurinic or apyrimidinic site) lyase OS=Hordeum vulgare subsp. vulgare OX=112509 PE=3 SV=1	High					0.0570667	-0.102996	-1.06247	-0.040324	0.635532	-0.200509	0.0161139	0.359851	0.369176	0.419005	0.42565	0.515612	0.223216	0.444771	-0.433217	-0.583525	-0.852671	0.256116	A0A287LTI6	0	0	0	0	0	0	0	0	0	0	0	0	0	0	0	0	0	0	0	0	0	0	0	0
F2CZ13	Predicted protein OS=Hordeum vulgare subsp. vulgare OX=112509 PE=2 SV=1	High	transport	membrane	catalytic activity;transporter activity	Pf03030	0.383169	0.485842	0.991748	-0.284763	-1.71873	-1.3921	0.832529	0.575116	1.34451	-1.4119	-0.133844	-1.64735	2.55434	2.9473	0.539691	-0.444771	-0.855241	-0.763309	F2CZ13	0	0	0	0	-1	0	0	0	0	0	0	-1	1	1	0	0	0	0	4	1	1	2	1	2
A0A287KUJ3	Rubrerythrin domain-containing protein OS=Hordeum vulgare subsp. vulgare OX=112509 PE=3 SV=1	High																							A0A287KUJ3	0	0	0	0	0	0	0	0	0	0	0	0	0	0	0	0	0	0	0	0	0	0	0	0
F2DFA6	Predicted protein OS=Hordeum vulgare subsp. vulgare OX=112509 PE=2 SV=1	High	metabolic process	ribosome	structural molecule activity	Pf00411	0.170318	0.0437377	-0.260746	0.456463	0.332477	0.568178	0.105558	0.0247961	-0.0317971	0.223271	0.0727186	0.258667	0.331221	-0.22051	0.0354162	0.296952	-0.069812	0.226662	F2DFA6	0	0	0	0	0	0	0	0	0	0	0	0	0	0	0	0	0	0	0	0	0	0	0	0
M0YDQ0	Uncharacterized protein OS=Hordeum vulgare subsp. vulgare OX=112509 PE=3 SV=1	High	metabolic process		catalytic activity	Pf00026,Pf03489,Pf05184,Pf14541																			M0YDQ0	0	0	0	0	0	0	0	0	0	0	0	0	0	0	0	0	0	0	0	0	0	0	0	0
A0A287PXV4	Uncharacterized protein OS=Hordeum vulgare subsp. vulgare OX=112509 PE=3 SV=1	High					-0.126069	0.446004	0.305101	-0.0764742	-0.63613	-0.299784	-0.246567	-0.125207	-0.432764	-1.10244	-0.448305	-0.677807	0.564165	0.254939	-0.189728	0.279818	0.19695	0.0347976	A0A287PXV4	0	0	0	0	0	0	0	0	0	0	0	0	0	0	0	0	0	0	0	0	0	0	0	0
A0A287M6Q9	Uncharacterized protein OS=Hordeum vulgare subsp. vulgare OX=112509 PE=3 SV=1	High																							A0A287M6Q9	0	0	0	0	0	0	0	0	0	0	0	0	0	0	0	0	0	0	0	0	0	0	0	0
A0A287UST5	Uncharacterized protein OS=Hordeum vulgare subsp. vulgare OX=112509 PE=4 SV=1	High					0.0553008	0.439927	0.222671	-0.474125	0.78181	1.04463	0.0150774	0.0516729	0.628842	-0.492962	0.98206	0.471161	0.0676594	0.127135	-0.326071	-0.512788	0.500208	0.0558624	A0A287UST5	0	0	0	0	0	0	0	0	0	0	0	0	0	0	0	0	0	0	0	0	0	0	0	0
A0A287HZW2	Ribosomal_L16 domain-containing protein OS=Hordeum vulgare subsp. vulgare OX=112509 PE=3 SV=1	High					-0.105062	0.275111	0.798288	-0.0798115	-1.16883	-1.15333	0.176476	0.280721	-0.137938	-0.973265	-0.792169	-0.234537	2.24914	1.90477	0.835835	0.66003	0.590839	0.0930504	A0A287HZW2	0	0	0	0	0	0	0	0	0	0	0	0	1	1	0	0	0	0	2	0	0	2	1	1
A0A287JN82	Pyruvate kinase OS=Hordeum vulgare subsp. vulgare OX=112509 PE=3 SV=2	High																							A0A287JN82	0	0	0	0	0	0	0	0	0	0	0	0	0	0	0	0	0	0	0	0	0	0	0	0
A0A287GTY9	U6 snRNA-associated Sm-like protein LSm8 OS=Hordeum vulgare subsp. vulgare OX=112509 GN=LSM8 PE=3 SV=1	High					1.15806	1.20035	0.891471	0.921734	1.26017	0.122428	1.11944	0.338318	1.30739	1.60517	1.36627	2.05735	1.28851	-0.63946	0.0996038				A0A287GTY9	0	0	0	0	0	0	0	0	0	1	0	1	0	0	0	0	0	0	2	0	2	0	1	0
F2DVI8	Predicted protein OS=Hordeum vulgare subsp. vulgare OX=112509 PE=2 SV=1	High	metabolic process;response to stimulus		catalytic activity	Pf00581,Pf00639,Pf13145,Pf13616	0.0704979	-0.00969742	0.444197	0.336161	-0.268554	-0.274185	0.592305	0.4413	0.478765	1.1828	0.994279	1.39797	1.06086	1.07367	0.798158	-0.181684	-0.594546	0.0605656	F2DVI8	0	0	0	0	0	0	0	0	0	0	0	0	0	0	0	0	0	0	0	0	0	0	0	0
F2CTY9	Polyadenylate-binding protein (Fragment) OS=Hordeum vulgare subsp. vulgare OX=112509 PE=2 SV=1	High		cytoplasm	RNA binding	Pf00076,Pf00658,Pf08777,Pf13893,Pf14259	0.113041	0.261652	-0.332307	0.483084	0.735963	-0.329761	-0.349162	0.139318	-0.264022	0.69897	1.09041	0.958258	-0.615868	-0.563442	0.130846	0.596917	0.657191	1.71878	F2CTY9	0	0	0	0	0	0	0	0	0	0	0	0	0	0	0	0	0	1	1	0	0	1	0	0
F2CV61	4-hydroxyphenylpyruvate dioxygenase OS=Hordeum vulgare subsp. vulgare OX=112509 PE=2 SV=1	High	metabolic process		catalytic activity;metal ion binding	Pf00903,Pf13669																			F2CV61	0	0	0	0	0	0	0	0	0	0	0	0	0	0	0	0	0	0	0	0	0	0	0	0
M0UHA5	Costars domain-containing protein OS=Hordeum vulgare subsp. vulgare OX=112509 PE=4 SV=1	High				Pf14705	-0.430692	-0.283935	-0.560164	-0.10317	-0.299777	-0.372622	-0.522519	-0.52224	-0.928174	0.522614	-0.0280653	0.0177667	-1.26394	-0.742569	0.0178375	-0.119084	-0.432892	-0.138645	M0UHA5	0	0	0	0	0	0	0	0	0	0	0	0	0	0	0	0	0	0	0	0	0	0	0	0
F2DDD5	Predicted protein OS=Hordeum vulgare subsp. vulgare OX=112509 PE=2 SV=1	High	metabolic process		catalytic activity;RNA binding	Pf01472,Pf01509,Pf08068																			F2DDD5	0	0	0	0	0	0	0	0	0	0	0	0	0	0	0	0	0	0	0	0	0	0	0	0
A0A287PR25	Ribosomal_L2_C domain-containing protein OS=Hordeum vulgare subsp. vulgare OX=112509 PE=3 SV=1	High					-0.0395909	-0.161139	-0.0362853	0.448636	-0.188516	0.363702	0.0190407	0.0642691	-0.133953	0.0549964	-0.603229	0.53045	-0.490337	-0.452859	-0.726217	-0.0721633	-0.285047	-0.559963	A0A287PR25	0	0	0	0	0	0	0	0	0	0	0	0	0	0	0	0	0	0	0	0	0	0	0	0
M0YH64	Phytocyanin domain-containing protein OS=Hordeum vulgare subsp. vulgare OX=112509 PE=4 SV=1	High	metabolic process			Pf02298	2.19693	1.68531	1.50699	0.0180891	-1.0414	-0.985928	-0.0621612	0.443105	0.134058	0.210933	0.272511	0.590734	-0.0385159	0.193504	-0.0484722	0.100768	-1.44578	0.595581	M0YH64	1	1	1	0	0	0	0	0	0	0	0	0	0	0	0	0	0	0	3	3	0	0	1	1
F2DGF7	Predicted protein OS=Hordeum vulgare subsp. vulgare OX=112509 PE=2 SV=1	High	defense response;response to stimulus			Pf00407	0.894539	0.725432	0.263239	1.22954	1.10142	1.23511	0.162913	-0.411976	-0.422942	1.63822	1.39783	0.227372				-0.394671	0.40426	-2.1525	F2DGF7	0	0	0	0	0	0	0	0	0	1	0	0	0	0	0	0	0	-1	2	0	1	1	1	0
F2D9R2	Predicted protein OS=Hordeum vulgare subsp. vulgare OX=112509 PE=2 SV=1	High																							F2D9R2	0	0	0	0	0	0	0	0	0	0	0	0	0	0	0	0	0	0	0	0	0	0	0	0
F2D1Q5	Peroxidase (Fragment) OS=Hordeum vulgare subsp. vulgare OX=112509 PE=2 SV=1	High	metabolic process;response to stimulus	extracellular	antioxidant activity;catalytic activity;metal ion binding	Pf00141																			F2D1Q5	0	0	0	0	0	0	0	0	0	0	0	0	0	0	0	0	0	0	0	0	0	0	0	0
F2EBI3	Predicted protein OS=Hordeum vulgare subsp. vulgare OX=112509 PE=2 SV=1	High	metabolic process	membrane	catalytic activity;nucleotide binding		-1.30096	-0.588656	-0.363041	-1.23243	-0.69964	-1.46674	-0.349316	0.380239	-0.214839	-1.6316	0.292033	-1.08083	1.57812	1.88437	0.214246	0.366078	1.21471	0.490444	F2EBI3	0	0	0	0	0	0	0	0	0	-1	0	0	1	1	0	0	0	0	3	0	1	2	2	1
F2CQ27	GTP-binding nuclear protein OS=Hordeum vulgare subsp. vulgare OX=112509 PE=2 SV=1	High	regulation of biological process;response to stimulus;transport	nucleus	catalytic activity;nucleotide binding	Pf00025,Pf00071,Pf08477	-0.554004	0.24177	0.450684	0.11651	0.561316	0.667853	-0.0334979	0.497079	0.49976	-0.474084	0.122467	0.5851	1.29126		0.214816	1.0371	0.237377	-0.346163	F2CQ27	0	0	0	0	0	0	0	0	0	0	0	0	0	0	0	0	0	0	0	0	0	0	0	0
A0A287J1Y0	Uncharacterized protein OS=Hordeum vulgare subsp. vulgare OX=112509 PE=3 SV=1	High					1.45547	0.0312967	1.19177	0.376503	0.666131	-0.622571	1.45479	1.06012	1.08933	-1.04361	0.731636	0.344554							A0A287J1Y0	0	0	0	0	0	0	0	0	0	0	0	0	0	0	0	0	0	0	0	0	0	0	0	0
F2DSX3	Cysteine synthase OS=Hordeum vulgare subsp. vulgare OX=112509 PE=2 SV=1	High	metabolic process	mitochondrion	catalytic activity	Pf00291	-1.38492	0.408966	0.970797	0.0876506	-0.670803	-1.16066	0.310314	0.106037	0.159092	-2.54238	-0.880527	-1.54527	1.72089	0.572954	-0.172751	0.613772	0.883118	-0.92435	F2DSX3	0	0	0	0	0	0	0	0	0	-1	0	-1	1	0	0	0	0	0	3	0	2	1	2	0
F2D8I4	Predicted protein OS=Hordeum vulgare subsp. vulgare OX=112509 PE=2 SV=1	High	defense response;response to stimulus																						F2D8I4	0	0	0	0	0	0	0	0	0	0	0	0	0	0	0	0	0	0	0	0	0	0	0	0
A0A287DTW3	BOWMAN_BIRK domain-containing protein OS=Hordeum vulgare subsp. vulgare OX=112509 PE=4 SV=1	High					0.27096	0.97941	0.0254559	-0.933049	-1.35821	-1.82415	0.044752	-1.76491	-0.678847	0.96837	-1.17083	-0.457026	-0.650556	-0.854041	-0.996358	-1.5989	-3.3303	-2.08326	A0A287DTW3	0	0	0	0	0	-1	0	-1	0	0	0	0	0	0	0	-1	-1	-1	5	1	1	3	1	2
A0A287NH13	Cytochrome b-c1 complex subunit 6 OS=Hordeum vulgare subsp. vulgare OX=112509 PE=3 SV=1	High					1.30274	1.15718	1.21048	0.808738	0.547404	-0.340073	0.982037	1.08081	1.01582	1.05862	1.11326	1.32705	0.657347	0.850878	0.183009	1.50509	0.934545	1.89817	A0A287NH13	0	0	0	0	0	0	0	0	0	0	0	0	0	0	0	1	0	1	2	0	0	2	1	0
F2CPS1	Predicted protein OS=Hordeum vulgare subsp. vulgare OX=112509 PE=2 SV=1	High				Pf07802	0.617419	1.01203	-0.696654	0.889279	0.791615	0.533888	-0.667116	-0.326811	0.0875991	2.00189	1.48397	1.76069	-0.370026		0.956381	0.537892	0.294489	0.095422	F2CPS1	0	0	0	0	0	0	0	0	0	1	0	1	0	0	0	0	0	0	2	0	2	0	1	0
A0A287MUG1	Uncharacterized protein OS=Hordeum vulgare subsp. vulgare OX=112509 PE=4 SV=1	High																							A0A287MUG1	0	0	0	0	0	0	0	0	0	0	0	0	0	0	0	0	0	0	0	0	0	0	0	0
Q8VWW3	Glutathione transferase OS=Hordeum vulgare subsp. vulgare OX=112509 GN=GST6 PE=2 SV=1	High			catalytic activity;protein binding	Pf00043,Pf02798,Pf13409,Pf13410,Pf13417	-0.806131	0.223367	0.382097	1.27179	1.75905	0.639325	-0.0976392	0.072677	0.542497	-0.840791	-0.773152	0.421347	1.41813	0.306742	-0.00296789	1.60778	2.0813	1.31937	Q8VWW3	0	0	0	0	1	0	0	0	0	0	0	0	0	0	0	1	1	0	3	1	0	2	1	2
A0A287WAX2	Uncharacterized protein OS=Hordeum vulgare subsp. vulgare OX=112509 PE=4 SV=1	High																							A0A287WAX2	0	0	0	0	0	0	0	0	0	0	0	0	0	0	0	0	0	0	0	0	0	0	0	0
A0A287PXJ9	Uncharacterized protein OS=Hordeum vulgare subsp. vulgare OX=112509 PE=4 SV=1	High					0.990648	0.587154	0.534628	0.581768	0.0508809	-0.0982446	0.780445	0.16484	0.701116	1.02728	0.452033	1.15825	-0.848203	-1.04667	-0.616616	-0.640034	-1.12339	-0.040177	A0A287PXJ9	0	0	0	0	0	0	0	0	0	0	0	0	0	0	0	0	0	0	0	0	0	0	0	0
F2D9U3	Predicted protein OS=Hordeum vulgare subsp. vulgare OX=112509 PE=2 SV=1	High	metabolic process;response to stimulus		catalytic activity	Pf01625	0.510975	0.477145	0.461538	0.77595	0.0168868	0.745999	-0.273613	-0.366874	-0.129538	0.168156	0.0463186	0.0972542	-0.351298	-0.277224	0.150634	-0.510474	-0.590766	-0.822223	F2D9U3	0	0	0	0	0	0	0	0	0	0	0	0	0	0	0	0	0	0	0	0	0	0	0	0
A0A287SFZ8	Thioredoxin domain-containing protein OS=Hordeum vulgare subsp. vulgare OX=112509 PE=4 SV=1	High					0.481569	0.61121	-0.470617	1.56006	2.12081	1.99454	0.201929	0.71327	0.233447	0.552246	1.0259	0.137204	-0.995762	-1.09153	-0.918669	2.50834	2.77429	1.4883	A0A287SFZ8	0	0	0	1	1	1	0	0	0	0	0	0	0	0	0	1	1	0	5	3	0	2	2	2
M0VVW8	Uncharacterized protein OS=Hordeum vulgare subsp. vulgare OX=112509 PE=3 SV=1	High	metabolic process;transport			Pf00254,Pf05697,Pf05698	-0.445302	-0.121001	-0.0759589	-0.31469	-0.022817	-0.607743	-0.0738288	0.220885	0.150661	-0.394268	0.0250279	-0.389008	-0.119226	-0.45951	-0.168808	-0.159006	-0.0609441	0.126033	M0VVW8	0	0	0	0	0	0	0	0	0	0	0	0	0	0	0	0	0	0	0	0	0	0	0	0
F2CQK9	Predicted protein OS=Hordeum vulgare subsp. vulgare OX=112509 PE=2 SV=1	High	cellular homeostasis;metabolic process;regulation of biological process		catalytic activity	Pf00462,Pf04908	-0.413293	-0.160001	-0.109516	-0.169909	-0.20484	-0.463092	-0.213613	-0.370635	-0.618141	0.0371281	-0.306051	-0.0694027	-0.710937	-0.0865139	0.239506	-0.728593	-0.772785	-0.431457	F2CQK9	0	0	0	0	0	0	0	0	0	0	0	0	0	0	0	0	0	0	0	0	0	0	0	0
A0A287EE97	Pex14_N domain-containing protein OS=Hordeum vulgare subsp. vulgare OX=112509 PE=4 SV=1	High					0.025168	0.206943	-0.504939	0.0596237	0.534348	-0.220448	0.580399	0.0265668	0.945261	1.28928	0.635935	0.59575	1.20942	1.60984	1.48946				A0A287EE97	0	0	0	0	0	0	0	0	0	0	0	0	0	1	0	0	0	0	1	0	0	1	0	1
A0A287X4T5	Alba domain-containing protein OS=Hordeum vulgare subsp. vulgare OX=112509 PE=4 SV=1	High					0.261118	0.291568	-0.189032	0.740524	-0.120207	0.643795	0.0888715	0.0563685	0.0828635	0.622132	0.098534	0.718808	-0.486634	-0.528166	-0.296664	-0.0790792	-0.138973	0.977754	A0A287X4T5	0	0	0	0	0	0	0	0	0	0	0	0	0	0	0	0	0	0	0	0	0	0	0	0
A0A287SZV1	Nascent polypeptide-associated complex subunit beta OS=Hordeum vulgare subsp. vulgare OX=112509 PE=3 SV=1	High																							A0A287SZV1	0	0	0	0	0	0	0	0	0	0	0	0	0	0	0	0	0	0	0	0	0	0	0	0
F2D8N3	Predicted protein OS=Hordeum vulgare subsp. vulgare OX=112509 PE=2 SV=1	High		membrane		Pf14159	-0.107251	0.426265	0.567538	0.50829	0.251416	0.373721	-0.159272	-0.285118	-0.221164	-0.93381	-0.474458	-0.472495	0.594021	-0.272378	-0.0472048	0.345703	0.834473	-0.912446	F2D8N3	0	0	0	0	0	0	0	0	0	0	0	0	0	0	0	0	0	0	0	0	0	0	0	0
A0A287QVU9	Dihydrolipoamide acetyltransferase component of pyruvate dehydrogenase complex OS=Hordeum vulgare subsp. vulgare OX=112509 PE=4 SV=1	High					1.5258	1.77689	0.388965	0.843456	1.83632	0.896324	0.748406	-1.16349	-0.333134	-0.0316638	-0.400944	0.316302	2.1426	3.11657	-0.0616978	-0.342425	-3.1502	-1.08397	A0A287QVU9	1	1	0	0	1	0	0	0	0	0	0	0	1	1	0	0	-1	0	6	3	0	3	2	4
F2DA07	Predicted protein OS=Hordeum vulgare subsp. vulgare OX=112509 PE=2 SV=1	High	regulation of biological process;response to stimulus		enzyme regulator activity	Pf00280																			F2DA07	0	0	0	0	0	0	0	0	0	0	0	0	0	0	0	0	0	0	0	0	0	0	0	0
F2CYS4	Predicted protein OS=Hordeum vulgare subsp. vulgare OX=112509 PE=2 SV=1	High	metabolic process		catalytic activity	Pf00534,Pf05116,Pf13524,Pf13692	0.488612	0.65216	-0.44929	1.03246	0.904664	1.06544	-0.0451457	-0.0134698	0.472395	0.027428	0.642938	0.587405							F2CYS4	0	0	0	0	0	0	0	0	0	0	0	0	0	0	0	0	0	0	0	0	0	0	0	0
A0A287P2A7	Uncharacterized protein OS=Hordeum vulgare subsp. vulgare OX=112509 PE=4 SV=1	High					0.847171	1.05233	0.0517547	-0.732364	0.450547	1.57203	0.446846	0.307989	0.704378	0.515901	0.064587	0.72908	-0.0662186	0.0689845	-1.58947	0.326414	0.238343	0.0430769	A0A287P2A7	0	0	0	0	0	1	0	0	0	0	0	0	0	0	-1	0	0	0	2	1	0	1	0	0
O04896	Glucose-1-phosphate adenylyltransferase OS=Hordeum vulgare OX=4513 GN=blpl PE=2 SV=1	High	metabolic process		catalytic activity;nucleotide binding	Pf00483	-0.263272	0.679091	-0.00915931	-0.136171	0.00170636	-1.08053	-0.807114	-0.453411	-0.728673	-1.63401	-1.17477	-0.779599	1.23248	-0.60643	0.388739	1.21451	0.995697	2.21315	O04896	0	0	0	0	0	0	0	0	0	-1	0	0	0	0	0	0	0	1	2	0	1	1	1	0
A0A287W050	Uncharacterized protein OS=Hordeum vulgare subsp. vulgare OX=112509 PE=4 SV=1	High					0.248915	-0.0343119	0.505567	0.44939	0.074629	0.351745	-0.0797183	-0.0863106	0.514998	1.43144	0.545453	1.47123	-0.494909	-0.172327	-0.395041	-1.25785	-1.10647	-0.28727	A0A287W050	0	0	0	0	0	0	0	0	0	0	0	0	0	0	0	0	0	0	0	0	0	0	0	0
M0YUL2	Uncharacterized protein OS=Hordeum vulgare subsp. vulgare OX=112509 PE=4 SV=1	High				Pf13561	0.292663	0.953031	1.63315	1.19216	0.0349334	0.0562874	0.355081	0.176588	0.674642	-0.771535	-0.107917	-0.758976	2.79155	2.12455	0.837427				M0YUL2	0	0	1	0	0	0	0	0	0	0	0	0	1	1	0	0	0	0	3	1	0	2	1	1
M0VYW3	Ferredoxin OS=Hordeum vulgare subsp. vulgare OX=112509 PE=3 SV=1	High	metabolic process;transport		metal ion binding	Pf00111	-0.0798275	0.674865	-0.420627	-2.66471	-0.251256	-2.0038	-0.523334	-0.789528	-0.730157	-2.07922	0.261694	-1.37794	-0.221189	0.177529	-0.0884539	-1.08235	-0.573106	-0.6466	M0VYW3	0	0	0	-1	0	-1	0	0	0	-1	0	0	0	0	0	0	0	0	3	2	1	0	2	0
F2CXR8	Predicted protein OS=Hordeum vulgare subsp. vulgare OX=112509 PE=2 SV=1	High					0.131304	-0.412937	-0.625521	0.940667	0.302125	0.0495421	0.137996	-0.518428	-0.00100739	0.256297	-0.99949	-0.509621	-0.493907	-0.826399	0.822309	-0.0343987	-0.776691	1.12317	F2CXR8	0	0	0	0	0	0	0	0	0	0	0	0	0	0	0	0	0	0	0	0	0	0	0	0
F2E2K8	Predicted protein OS=Hordeum vulgare subsp. vulgare OX=112509 PE=2 SV=1	High	transport	membrane	transporter activity	Pf00230																			F2E2K8	0	0	0	0	0	0	0	0	0	0	0	0	0	0	0	0	0	0	0	0	0	0	0	0
F2E805	Predicted protein OS=Hordeum vulgare subsp. vulgare OX=112509 PE=2 SV=1	High				Pf06244	-0.20923	-0.568504	-0.362145	1.14189	-0.130927	1.55621	0.526724	0.346203	0.828189	0.928158	0.417621	1.25928	-0.104693	0.136045	1.429	-1.07958	1.91014	1.92633	F2E805	0	0	0	0	0	1	0	0	0	0	0	0	0	0	0	0	1	1	3	1	0	2	0	1
A0A287EIM2	Uncharacterized protein OS=Hordeum vulgare subsp. vulgare OX=112509 PE=4 SV=1	High																							A0A287EIM2	0	0	0	0	0	0	0	0	0	0	0	0	0	0	0	0	0	0	0	0	0	0	0	0
F2DAC4	Predicted protein OS=Hordeum vulgare subsp. vulgare OX=112509 PE=2 SV=1	High				Pf01187	0.465201	0.666473	0.275285	0.334487	-0.578364	0.0894561	-0.43616	-0.152311	-0.0025917	0.246716	0.0538144	0.522509	-0.471362	-0.517604	-0.327064	-0.268461	-0.00395246	0.175166	F2DAC4	0	0	0	0	0	0	0	0	0	0	0	0	0	0	0	0	0	0	0	0	0	0	0	0
A0A287UIJ6	Uncharacterized protein OS=Hordeum vulgare subsp. vulgare OX=112509 PE=3 SV=1	High					0.707032	0.511277	0.475959	0.233466	-0.483241	0.173557	-0.282214	-0.0218302	-0.820229	-0.101409	0.623869	0.766843	0.287238	-0.398195	-0.119087	0.568529	1.13167	0.706689	A0A287UIJ6	0	0	0	0	0	0	0	0	0	0	0	0	0	0	0	0	0	0	0	0	0	0	0	0
A0A287RJR5	PDZ domain-containing protein OS=Hordeum vulgare subsp. vulgare OX=112509 PE=4 SV=1	High					-3.22165	-1.94101	-4.85448	0.910216	0.284469	0.836993	0.964747	0.914388	0.782576	2.45908	1.5448	2.43907	1.99899	4.01272	2.4049	-1.08558	-0.104066	-0.643875	A0A287RJR5	-1	-1	-1	0	0	0	0	0	0	1	1	1	1	1	1	0	0	0	9	3	3	3	3	3
A0A287FWY4	Uncharacterized protein OS=Hordeum vulgare subsp. vulgare OX=112509 PE=4 SV=1	High					0.0107144	0.453882	1.10897	-0.403986	1.39027	1.57207	-0.398613	0.920719	0.342577	0.244391	-0.633181	-0.234331	0.577128	-0.218892	0.105897	-0.562458	-1.95966	-1.55084	A0A287FWY4	0	0	0	0	0	1	0	0	0	0	0	0	0	0	0	0	-1	-1	3	1	0	2	0	1
A0A287VMX4	Uncharacterized protein OS=Hordeum vulgare subsp. vulgare OX=112509 PE=4 SV=1	High					3.0784	2.55052	3.15199	0.56037	0.195558	0.362898	0.150174	0.0778581	0.763205	-0.811214	0.804665	1.10899							A0A287VMX4	1	1	1	0	0	0	0	0	0	0	0	0	0	0	0	0	0	0	3	3	0	0	1	1
F2E974	Predicted protein OS=Hordeum vulgare subsp. vulgare OX=112509 PE=2 SV=1	High				Pf06741,Pf14438	0.0867589	0.590346	0.375438	0.831222	0.355857	-0.786138	-0.0162715	0.109798	0.207042	0.716604	0.419796	0.551829	-0.494203	-1.32408	-0.479135	-0.381478	-0.491191	0.395127	F2E974	0	0	0	0	0	0	0	0	0	0	0	0	0	0	0	0	0	0	0	0	0	0	0	0
F2D5L2	Predicted protein OS=Hordeum vulgare subsp. vulgare OX=112509 PE=2 SV=1	High	transport		metal ion binding	Pf00403	-0.870347	-0.615751	-0.486503	-1.51358	-0.614151	-1.41864	-0.146629	-0.152358	0.346413	0.525539	0.540616	0.344375				1.20378	0.201009	1.42591	F2D5L2	0	0	0	-1	0	0	0	0	0	0	0	0	0	0	0	0	0	0	1	1	0	0	1	0
A0A287R566	RRM domain-containing protein OS=Hordeum vulgare subsp. vulgare OX=112509 PE=4 SV=1	High					0.0523186	0.024828	-0.190521	0.567921	-0.12149	0.418573	0.269277	0.254301	-0.141737	0.0655958	-0.552338	-0.120359	-0.699777	-0.307101	-0.174581	-0.486931	-1.17623	-0.343669	A0A287R566	0	0	0	0	0	0	0	0	0	0	0	0	0	0	0	0	0	0	0	0	0	0	0	0
A0A287FRQ6	Uncharacterized protein OS=Hordeum vulgare subsp. vulgare OX=112509 PE=4 SV=1	High					-0.0411867	-0.294028	0.347585	0.370817	0.444621	0.538724	-0.0075134	-0.156242	0.21164	1.38143	0.191055	1.77737	-2.38397		-0.370836	-1.35684	-1.04557	0.14544	A0A287FRQ6	0	0	0	0	0	0	0	0	0	0	0	1	-1	0	0	0	0	0	2	0	1	1	1	0
A0A287WWV0	Uncharacterized protein OS=Hordeum vulgare subsp. vulgare OX=112509 PE=4 SV=1	High					0.547239	-0.368023	-0.82606	1.41867	0.200926	1.33655	-0.128765	-0.0864857	-0.0714824	0.565171	0.0264811	1.0645	-0.462733	-0.729226	-0.598312	-0.566219	-1.32068	-0.326508	A0A287WWV0	0	0	0	0	0	0	0	0	0	0	0	0	0	0	0	0	0	0	0	0	0	0	0	0
F2D2B8	50S ribosomal protein L35 OS=Hordeum vulgare subsp. vulgare OX=112509 PE=2 SV=1	High	metabolic process	ribosome	structural molecule activity	Pf01632	0.529703	0.562877	0.4407	-1.08394	-0.142861	-1.28852	0.23472	0.176766	0.0178142	-0.401742	-0.222863	-1.17747	-0.0520847	-0.040601	0.547976	0.185658	0.572725	0.832115	F2D2B8	0	0	0	0	0	0	0	0	0	0	0	0	0	0	0	0	0	0	0	0	0	0	0	0
Q9T2L5	26 kDa heat shock protein OS=Hordeum vulgare OX=4513 PE=3 SV=1	High	response to stimulus			Pf00011																			Q9T2L5	0	0	0	0	0	0	0	0	0	0	0	0	0	0	0	0	0	0	0	0	0	0	0	0
A0A287J6Y7	HP domain-containing protein OS=Hordeum vulgare subsp. vulgare OX=112509 PE=4 SV=1	High					-0.264732	-1.03016	-1.04945	1.33216	1.16449	1.36005	-0.0646482	0.353809	-0.19901	1.29897	1.11823	1.14414	-0.0832945	-0.181139		-1.22956	-1.03894	0.263644	A0A287J6Y7	0	0	0	0	0	0	0	0	0	0	0	0	0	0	0	0	0	0	0	0	0	0	0	0
A0A287R7H8	Uncharacterized protein OS=Hordeum vulgare subsp. vulgare OX=112509 PE=4 SV=1	High																							A0A287R7H8	0	0	0	0	0	0	0	0	0	0	0	0	0	0	0	0	0	0	0	0	0	0	0	0
A0A287SP63	Uncharacterized protein OS=Hordeum vulgare subsp. vulgare OX=112509 PE=4 SV=1	High					-0.616879	0.022059	0.836645	-0.0970332	-0.88959	-0.572848	0.399678	0.293938	0.262503	-1.21911	-0.365402	-0.366699	1.96277	1.25916	0.830545	1.43397	1.4035	0.300007	A0A287SP63	0	0	0	0	0	0	0	0	0	0	0	0	1	0	0	0	0	0	1	0	0	1	1	0
F2D334	Predicted protein OS=Hordeum vulgare subsp. vulgare OX=112509 PE=2 SV=1	High				Pf11341	0.43997	0.415475	0.175697	-2.24728	-0.260048	-1.7784	-0.122757	0.0686361	-0.214901	-0.744343	0.194443	-0.731323	-0.14	0.466899	0.146709	-0.42064	-0.34251	-0.819324	F2D334	0	0	0	-1	0	-1	0	0	0	0	0	0	0	0	0	0	0	0	2	2	0	0	1	0
A0A287SHI8	Citrate synthase OS=Hordeum vulgare subsp. vulgare OX=112509 PE=3 SV=1	High																							A0A287SHI8	0	0	0	0	0	0	0	0	0	0	0	0	0	0	0	0	0	0	0	0	0	0	0	0
A0A287K1M0	Uncharacterized protein OS=Hordeum vulgare subsp. vulgare OX=112509 PE=4 SV=1	High					0.478215	0.549996	-0.920128	0.817963	0.485102	1.35632	1.77756	1.07857	2.09575	2.5285	2.10856	1.46399							A0A287K1M0	0	0	0	0	0	0	1	0	1	1	1	0	0	0	0	0	0	0	4	0	4	0	2	1
A0A287IBQ3	Uncharacterized protein OS=Hordeum vulgare subsp. vulgare OX=112509 PE=4 SV=1	High					-2.22903	-0.509931	-0.821801	1.24034	0.977193	1.81264	-0.302405	-0.533317	-0.654651	-0.0587592	-0.72091	0.304804	-0.72873		0.10044	-0.985425	-1.54436	-1.09461	A0A287IBQ3	-1	0	0	0	0	1	0	0	0	0	0	0	0	0	0	0	-1	0	3	2	0	1	1	1
F2CR14	Predicted protein OS=Hordeum vulgare subsp. vulgare OX=112509 PE=2 SV=1	High		membrane			0.233119	0.348793	0.682685	0.824152	0.247585	0.585531	0.923727	1.15323	1.18634	1.24273	0.962264	1.09981	1.81799	1.16331	1.63609	1.44023	1.0916	1.78842	F2CR14	0	0	0	0	0	0	0	0	0	0	0	0	1	0	1	0	0	1	3	0	0	3	1	0
A0A287HL86	Uncharacterized protein OS=Hordeum vulgare subsp. vulgare OX=112509 PE=4 SV=1	High					0.368724	-0.183487	0.0451013	0.826188	-0.146386	1.22794	0.451629	0.216071	0.676918	0.739394	-0.221458	1.05919	-1.44793	-0.888964	0.152953	0.508548	-0.404268	1.44095	A0A287HL86	0	0	0	0	0	0	0	0	0	0	0	0	0	0	0	0	0	0	0	0	0	0	0	0
F2E2F1	Predicted protein OS=Hordeum vulgare subsp. vulgare OX=112509 PE=2 SV=1	High	metabolic process	ribosome	structural molecule activity	Pf01157	1.19746	1.64877	0.930266	-1.05179	1.0358	0.279078	0.185037	-0.740186	-0.00419301	2.12889	1.32254	1.31527	-0.445596	-0.23593	1.11691	0.492999	-0.491423	1.09074	F2E2F1	0	1	0	0	0	0	0	0	0	1	0	0	0	0	0	0	0	0	2	1	1	0	1	1
A0A287VQP9	Uncharacterized protein OS=Hordeum vulgare subsp. vulgare OX=112509 PE=4 SV=1	High					0.117216	-0.392243	0.101186	-0.413373	0.758331	-0.296997	-0.250457	0.0705071	-0.721453	0.213634	0.629434	0.649204	-0.170127	-1.07583	0.173639	-1.52453	-0.457761	-0.90112	A0A287VQP9	0	0	0	0	0	0	0	0	0	0	0	0	0	0	0	-1	0	0	1	0	0	1	1	0
F2CX25	Histone H2B OS=Hordeum vulgare subsp. vulgare OX=112509 PE=2 SV=1	High		chromosome;nucleus	DNA binding;protein binding	Pf00125	-0.580644	0.130764	0.927814	0.494158	-0.332797	0.483124	-0.209679	-0.185285	0.204272	-0.388556	-0.144406	0.300715	0.618484	0.0993219	-0.0221391	0.626796	0.596397	-0.403365	F2CX25	0	0	0	0	0	0	0	0	0	0	0	0	0	0	0	0	0	0	0	0	0	0	0	0
M0Y8I0	Uncharacterized protein OS=Hordeum vulgare subsp. vulgare OX=112509 PE=3 SV=1	High	transport	membrane	transporter activity	Pf00153																			M0Y8I0	0	0	0	0	0	0	0	0	0	0	0	0	0	0	0	0	0	0	0	0	0	0	0	0
A0A287PBY3	Uncharacterized protein OS=Hordeum vulgare subsp. vulgare OX=112509 PE=4 SV=1	High					2.05038	2.54902	2.31263	2.01604	-0.0758036	1.90104	-0.632308	-0.741281	-0.3653	0.104237	-1.1135	1.46973	-0.637507	-1.4894	-2.07177	1.81978	1.78303	1.98817	A0A287PBY3	1	1	1	1	0	1	0	0	0	0	0	0	0	0	-1	1	1	1	9	5	0	4	3	2
C1IC97	Histone deacetylase HD2 isoform 1 OS=Hordeum vulgare OX=4513 PE=2 SV=1	High			metal ion binding		0.560688	0.384017	-0.053241	0.252472	-0.230069	0.0347161	-0.046928	0.110782	0.146496	0.59912	0.265307	1.09037	-0.234144	-0.23223	-0.696796	0.33343	-0.53925	0.908871	C1IC97	0	0	0	0	0	0	0	0	0	0	0	0	0	0	0	0	0	0	0	0	0	0	0	0
S4Z1A6	50S ribosomal protein L14, chloroplastic OS=Hordeum vulgare subsp. vulgare OX=112509 GN=rpl14 PE=3 SV=1	High	metabolic process	ribosome	RNA binding;structural molecule activity	Pf00238	-0.391201	0.207633	0.457732	0.510276	-1.6009	-0.0037285	0.000215274	-0.09855	-0.445023	-1.75866	-0.725847	-0.147331	1.23653	0.824397	0.529556	0.611286	0.706677	-0.169414	S4Z1A6	0	0	0	0	-1	0	0	0	0	-1	0	0	0	0	0	0	0	0	2	1	1	0	1	1
M0US99	ATP-synt_DE_N domain-containing protein OS=Hordeum vulgare subsp. vulgare OX=112509 PE=3 SV=1	High	metabolic process;transport		catalytic activity;transporter activity	Pf02823	1.26821	1.76302	1.15969	0.607957	0.591028	0.967719	1.75608	0.534351	1.48721	0.696937	0.531174	1.65477	1.68702	0.0027618	0.727541	1.61752	0.579336	2.62782	M0US99	0	1	0	0	0	0	1	0	0	0	0	1	1	0	0	1	0	1	6	1	2	3	3	1
A0A287QXL1	DUF3700 domain-containing protein OS=Hordeum vulgare subsp. vulgare OX=112509 PE=4 SV=1	High					0.122284	-0.180216	0.512094	-0.0593852	-0.766613	-0.0701907	0.0970219	1.26026	0.00877213	-0.730124	-0.327124	0.368108	1.3524	1.0188	0.898571	0.647586	0.29415	0.224478	A0A287QXL1	0	0	0	0	0	0	0	0	0	0	0	0	0	0	0	0	0	0	0	0	0	0	0	0
A0A287J4M0	Ribosomal_S17_N domain-containing protein OS=Hordeum vulgare subsp. vulgare OX=112509 PE=3 SV=1	High					0.280152	-0.252379	0.91375	0.218621	1.16106	1.66138	-0.630881	-0.240827	-0.220344	-0.702154	-0.307113	0.581039	1.57385	0.440589		1.54474	0.676678	1.27359	A0A287J4M0	0	0	0	0	0	1	0	0	0	0	0	0	1	0	0	1	0	0	3	1	0	2	2	0
F2D355	Predicted protein OS=Hordeum vulgare subsp. vulgare OX=112509 PE=2 SV=1	High	metabolic process	ribosome	structural molecule activity	Pf00380	-1.64366	-1.16536	-0.165012	0.48324	1.15616	-1.10229	-0.493048	-0.982774	-0.183287	0.788128	0.639417	0.746266	-0.768496	0.206512	0.586213	1.25859	-0.467655	1.66209	F2D355	-1	0	0	0	0	0	0	0	0	0	0	0	0	0	0	0	0	1	2	1	0	1	1	0
A0A287MCJ7	AB hydrolase-1 domain-containing protein OS=Hordeum vulgare subsp. vulgare OX=112509 PE=4 SV=1	High					-0.26447	0.315595	0.664982	0.569643	0.785039	0.970115	0.36934	0.822181	0.214908	-0.310985	0.328871	-0.627403	0.814967	0.361401	0.0468094	-0.0477401	0.237692	-0.140529	A0A287MCJ7	0	0	0	0	0	0	0	0	0	0	0	0	0	0	0	0	0	0	0	0	0	0	0	0
F2E195	Predicted protein OS=Hordeum vulgare subsp. vulgare OX=112509 PE=2 SV=1	High	metabolic process;response to stimulus	membrane	catalytic activity;metal ion binding	Pf00067		0.184953	1.13502	-0.0230839	-0.643531	-1.13402	0.246273	0.432672	0.135815	-1.45013	0.546266	-0.257314							F2E195	0	0	0	0	0	0	0	0	0	0	0	0	0	0	0	0	0	0	0	0	0	0	0	0
A0A287HJT1	Uncharacterized protein OS=Hordeum vulgare subsp. vulgare OX=112509 PE=4 SV=1	High					1.36396	1.19735	0.786367	0.193641	1.01	-0.22119	0.20245	1.00853	0.134618	1.92943	0.41676	1.43815		-0.90714	-2.3288	0.236022	-0.178742	1.15886	A0A287HJT1	0	0	0	0	0	0	0	0	0	1	0	0	0	0	-1	0	0	0	2	0	1	1	1	0
F2D8E5	Non-specific lipid-transfer protein OS=Hordeum vulgare subsp. vulgare OX=112509 PE=2 SV=1	High	transport			Pf00234		-0.54237	1.00746	0.240145		0.0272481	-1.10786	-0.668497	-1.03661	1.29165	-0.517802	0.654184	-2.48003	-0.573479	-0.367318	1.01429	0.939475	2.275	F2D8E5	0	0	0	0	0	0	0	0	0	0	0	0	-1	0	0	0	0	1	2	0	0	2	1	0
F2DR77	Predicted protein OS=Hordeum vulgare subsp. vulgare OX=112509 PE=2 SV=1	High					-0.684598	-1.05561	0.707077	1.01655	-0.236966	-0.205897	-0.125325	-0.358578	-1.18459	-0.368403	-0.0643588	0.0756539	0.934975	-0.740986	0.511014	0.0271879	-0.108001	-0.564314	F2DR77	0	0	0	0	0	0	0	0	0	0	0	0	0	0	0	0	0	0	0	0	0	0	0	0
M0Z390	Uncharacterized protein OS=Hordeum vulgare subsp. vulgare OX=112509 PE=3 SV=1	High	metabolic process		catalytic activity	Pf00450																			M0Z390	0	0	0	0	0	0	0	0	0	0	0	0	0	0	0	0	0	0	0	0	0	0	0	0
F2DH00	Predicted protein OS=Hordeum vulgare subsp. vulgare OX=112509 PE=2 SV=1	High	cell organization and biogenesis			Pf05648	0.938529	0.908749	2.03083	0.679605	-0.293081	-0.0939819	-0.0953639	0.420126	0.577357	-0.779154	-0.435187	0.565391	2.74184	2.07561	0.484045	2.00168	2.14914	1.27928	F2DH00	0	0	1	0	0	0	0	0	0	0	0	0	1	1	0	1	1	0	5	1	0	4	2	2
A0A287X1F5	Uncharacterized protein OS=Hordeum vulgare subsp. vulgare OX=112509 PE=4 SV=1	High																							A0A287X1F5	0	0	0	0	0	0	0	0	0	0	0	0	0	0	0	0	0	0	0	0	0	0	0	0
F2D249	Predicted protein (Fragment) OS=Hordeum vulgare subsp. vulgare OX=112509 PE=2 SV=1	High					0.0354871	-0.171873	0.191891		0.142804	-0.301959	-0.253651	-0.101036	-0.009856	0.27853	-0.12151	-0.618881	0.249553	-0.091633	-0.667687	-0.334283	0.60327	-0.767541	F2D249	0	0	0	0	0	0	0	0	0	0	0	0	0	0	0	0	0	0	0	0	0	0	0	0
A0A287XG59	NAD(P)-bd_dom domain-containing protein OS=Hordeum vulgare subsp. vulgare OX=112509 PE=4 SV=1	High					0.0118972	-0.0106772	-0.999174	-0.836711	0.0793845	-0.833674	-0.107522	-0.236374	-0.476806	-0.791972	0.16723	-1.12689	0.18404	-0.346273	0.348685	-0.776395	-1.00238	-0.707822	A0A287XG59	0	0	0	0	0	0	0	0	0	0	0	0	0	0	0	0	0	0	0	0	0	0	0	0
P15737	Glucan endo-1,3-beta-glucosidase GII OS=Hordeum vulgare OX=4513 PE=1 SV=1	High	defense response;metabolic process;response to stimulus		catalytic activity	Pf00332																			P15737	0	0	0	0	0	0	0	0	0	0	0	0	0	0	0	0	0	0	0	0	0	0	0	0
F2E2Y9	Predicted protein OS=Hordeum vulgare subsp. vulgare OX=112509 PE=2 SV=1	High	cell organization and biogenesis	membrane		Pf02096																			F2E2Y9	0	0	0	0	0	0	0	0	0	0	0	0	0	0	0	0	0	0	0	0	0	0	0	0
M0YLC8	Uncharacterized protein OS=Hordeum vulgare subsp. vulgare OX=112509 PE=4 SV=1	High					-0.0504186	0.244936	-0.315451	-0.372992	0.138133	-0.539041	-0.279519	-0.0669179	-0.146794	0.190625	0.265139	-0.248504	-0.00756661	0.0340724	0.800573	0.0721426	0.67704	0.645296	M0YLC8	0	0	0	0	0	0	0	0	0	0	0	0	0	0	0	0	0	0	0	0	0	0	0	0
A0A287IL79	PLAT domain-containing protein OS=Hordeum vulgare subsp. vulgare OX=112509 PE=4 SV=1	High					1.41551	1.45861	1.77369	1.72538	1.59392	1.94192	0.666663	0.760402	0.637687	-0.406773	0.0809025	0.531246	2.38629	1.33311	0.849644	0.279493	0.137771	0.429248	A0A287IL79	0	0	1	1	1	1	0	0	0	0	0	0	1	0	0	0	0	0	5	4	0	1	2	1
A0A287LZU9	U6 snRNA-associated Sm-like protein LSm3 OS=Hordeum vulgare subsp. vulgare OX=112509 GN=LSM3 PE=3 SV=1	High					-0.0134323	0.521551	0.647796	0.0833607	0.0198989	0.113654	-0.226769	0.102024	0.0397076	0.0585299	-0.0457172	0.167941	1.22494	0.522374	0.606171	0.752433	0.695291	1.65591	A0A287LZU9	0	0	0	0	0	0	0	0	0	0	0	0	0	0	0	0	0	1	1	0	0	1	0	0
M0YS97	Uncharacterized protein OS=Hordeum vulgare subsp. vulgare OX=112509 PE=4 SV=1	High	cell organization and biogenesis;response to stimulus	membrane		Pf06549	-0.428095	0.0545053	0.344062	-0.137299	-0.209258	0.116444	0.478614	0.376619	0.235465	-1.92468	-0.836265	-1.54251	0.657732	0.106517	0.0843828	-0.223179	-0.222337	-0.121746	M0YS97	0	0	0	0	0	0	0	0	0	-1	0	-1	0	0	0	0	0	0	2	0	2	0	1	0
M0V3W4	Epimerase domain-containing protein OS=Hordeum vulgare subsp. vulgare OX=112509 PE=4 SV=1	High			catalytic activity	Pf01370	0.631872	1.26052	1.44219	1.14376	0.502182	1.39937	-0.50679	0.352686	0.0370637	-0.193429	-0.0112944	0.257884	1.18569	0.228637	-1.13644	0.170555	0.456201		M0V3W4	0	0	0	0	0	0	0	0	0	0	0	0	0	0	0	0	0	0	0	0	0	0	0	0
F2CYS2	Acyl carrier protein OS=Hordeum vulgare subsp. vulgare OX=112509 PE=2 SV=1	High	metabolic process	mitochondrion;organelle lumen		Pf00550,Pf14573	-1.62482	-0.971633	0.226614	0.260087	-0.336306	-1.01324	-1.9071	-0.813592	-2.19265	0.118711	-0.0457527	-0.914115	-2.88954	-2.37254	-0.64174	-2.52697	-2.65619	-1.99316	F2CYS2	-1	0	0	0	0	0	-1	0	-1	0	0	0	-1	-1	0	-1	-1	-1	8	1	2	5	4	2
A0A287QUE9	Uncharacterized protein OS=Hordeum vulgare subsp. vulgare OX=112509 PE=4 SV=1	High					-0.710468	-0.611156	-0.680096	0.141331	0.0251635	-1.15627	-0.56526	0.0981738	-0.323752	-0.357796	-0.227033	-0.546617	0.108145	-0.482158	-0.161179	-0.067293	-0.51732	-1.41018	A0A287QUE9	0	0	0	0	0	0	0	0	0	0	0	0	0	0	0	0	0	0	0	0	0	0	0	0
F2E1W2	Predicted protein OS=Hordeum vulgare subsp. vulgare OX=112509 PE=2 SV=1	High				Pf04755																			F2E1W2	0	0	0	0	0	0	0	0	0	0	0	0	0	0	0	0	0	0	0	0	0	0	0	0
A0A287UY36	AlaDh_PNT_C domain-containing protein OS=Hordeum vulgare subsp. vulgare OX=112509 PE=4 SV=1	High																							A0A287UY36	0	0	0	0	0	0	0	0	0	0	0	0	0	0	0	0	0	0	0	0	0	0	0	0
A0A287P1F9	Uncharacterized protein OS=Hordeum vulgare subsp. vulgare OX=112509 PE=4 SV=1	High																							A0A287P1F9	0	0	0	0	0	0	0	0	0	0	0	0	0	0	0	0	0	0	0	0	0	0	0	0
A0A287JSF7	3-isopropylmalate dehydrogenase OS=Hordeum vulgare subsp. vulgare OX=112509 PE=3 SV=1	High					2.00377	3.33445	3.53224	-0.0853169	-0.272583	-0.299041	0.696926	0.0301015	-0.0107039	-1.37664	0.0545054	0.321421	2.25897	0.37512	-0.315183	1.97559	0.830018	0.687434	A0A287JSF7	1	1	1	0	0	0	0	0	0	0	0	0	1	0	0	1	0	0	5	3	0	2	3	1
Q9M5G3	Translationally-controlled tumor protein homolog OS=Hordeum vulgare OX=4513 GN=TCTP PE=2 SV=2	High		cytoplasm		Pf00838	0.756443	1.22567	0.985524	0.514864	-0.329531	-0.225475	-0.425765	0.0562347	-0.36688	0.232122	0.179153	0.447531	-0.314231	-0.519292	-0.533378	0.988186	0.953545	0.401553	Q9M5G3	0	0	0	0	0	0	0	0	0	0	0	0	0	0	0	0	0	0	0	0	0	0	0	0
Q5D611	Dehydrin 7 OS=Hordeum vulgare subsp. spontaneum OX=77009 GN=Dhn7 PE=3 SV=1	High	response to stimulus																						Q5D611	0	0	0	0	0	0	0	0	0	0	0	0	0	0	0	0	0	0	0	0	0	0	0	0
A0A067YHQ4	Dehydrin 9 (Fragment) OS=Hordeum vulgare subsp. spontaneum OX=77009 GN=dhn9 PE=4 SV=1	High	response to stimulus																						A0A067YHQ4	0	0	0	0	0	0	0	0	0	0	0	0	0	0	0	0	0	0	0	0	0	0	0	0
M0XNN4	Adenylyl cyclase-associated protein OS=Hordeum vulgare subsp. vulgare OX=112509 PE=3 SV=1	High	cell organization and biogenesis		protein binding	Pf01213,Pf08603	0.734854	0.502	0.191395	0.816979	0.209723	0.348823	0.383204	0.488828	0.542855	0.403508	-0.0109431	0.5305	-0.0839098	-0.196045	-0.705194	-0.0958293	0.354322	1.1265	M0XNN4	0	0	0	0	0	0	0	0	0	0	0	0	0	0	0	0	0	0	0	0	0	0	0	0
A0A287HU60	V-type proton ATPase subunit H OS=Hordeum vulgare subsp. vulgare OX=112509 PE=4 SV=1	High																							A0A287HU60	0	0	0	0	0	0	0	0	0	0	0	0	0	0	0	0	0	0	0	0	0	0	0	0
A0A287LAC1	Uncharacterized protein OS=Hordeum vulgare subsp. vulgare OX=112509 PE=4 SV=1	High																							A0A287LAC1	0	0	0	0	0	0	0	0	0	0	0	0	0	0	0	0	0	0	0	0	0	0	0	0
A0A287QGL6	t-SNARE coiled-coil homology domain-containing protein OS=Hordeum vulgare subsp. vulgare OX=112509 PE=4 SV=1	High					0.846521	0.151045	-0.0394499	0.13538	0.40549	-0.478152	0.18081	0.00665103	0.250346	0.376656	0.845073	0.654033	-1.06514	-1.81429	-1.52474	-0.0569751	-1.3372	0.35927	A0A287QGL6	0	0	0	0	0	0	0	0	0	0	0	0	0	-1	-1	0	0	0	2	0	0	2	0	1
A0A287XXU1	Histone H2A OS=Hordeum vulgare subsp. vulgare OX=112509 PE=3 SV=1	High					-0.115872	0.203087	1.22818	0.471483	0.452054	1.05848	0.459904	-0.073734	0.24294	-0.79491	-0.664783	0.300258	2.48485	0.894746	0.704831	0.60016	0.424401	0.354031	A0A287XXU1	0	0	0	0	0	0	0	0	0	0	0	0	0	0	0	0	0	0	0	0	0	0	0	0
A0A287XM93	Uncharacterized protein OS=Hordeum vulgare subsp. vulgare OX=112509 PE=3 SV=1	High																							A0A287XM93	0	0	0	0	0	0	0	0	0	0	0	0	0	0	0	0	0	0	0	0	0	0	0	0
A0A287FX80	Uncharacterized protein OS=Hordeum vulgare subsp. vulgare OX=112509 PE=3 SV=1	High																							A0A287FX80	0	0	0	0	0	0	0	0	0	0	0	0	0	0	0	0	0	0	0	0	0	0	0	0
F2DY13	Predicted protein OS=Hordeum vulgare subsp. vulgare OX=112509 PE=2 SV=1	High		membrane	metal ion binding	Pf00173	0.609284	-0.488773	-0.170363	2.07632	-0.141953	1.50385	1.13264	1.16588	0.996377	1.69074	0.600422	1.58181	-0.571337	-1.1927	-0.507495	0.539655	-0.279667	0.243954	F2DY13	0	0	0	1	0	1	0	0	0	1	0	1	0	0	0	0	0	0	4	2	2	0	2	0
F2DBD1	Predicted protein OS=Hordeum vulgare subsp. vulgare OX=112509 PE=2 SV=1	High	metabolic process	ribosome	structural molecule activity	Pf00572	0.156241	-0.269141	-0.0181045	0.825398	0.146179	-0.105925	0.0824234	-0.203152	-0.342312	0.781092	-0.494663	0.786203	-0.383777	-1.16832	-0.107289	0.000942147	-0.750592	0.676114	F2DBD1	0	0	0	0	0	0	0	0	0	0	0	0	0	0	0	0	0	0	0	0	0	0	0	0
A0A287T5W3	Uncharacterized protein OS=Hordeum vulgare subsp. vulgare OX=112509 PE=4 SV=1	High																							A0A287T5W3	0	0	0	0	0	0	0	0	0	0	0	0	0	0	0	0	0	0	0	0	0	0	0	0
F2E986	Predicted protein OS=Hordeum vulgare subsp. vulgare OX=112509 PE=2 SV=1	High																							F2E986	0	0	0	0	0	0	0	0	0	0	0	0	0	0	0	0	0	0	0	0	0	0	0	0
F2DIH1	Predicted protein (Fragment) OS=Hordeum vulgare subsp. vulgare OX=112509 PE=2 SV=1	High				Pf03467,Pf04059	2.35904	1.14477	0.766208	1.27602	0.103663	-1.24379	2.39134	1.1375	1.36298	0.541385	0.751011	0.336969	-2.16899	-1.52291	-0.167435	0.801851	-0.957632	1.04494	F2DIH1	1	0	0	0	0	0	1	0	0	0	0	0	-1	-1	0	0	0	0	4	1	1	2	3	1
F2D017	Predicted protein OS=Hordeum vulgare subsp. vulgare OX=112509 PE=2 SV=1	High	metabolic process			Pf02298	0.132182	-0.0236471	-0.254634	2.45995	1.07016	2.31834	0.131233	0.462787	0.398323	1.7614	0.640786	2.22142	0.624265		0.824117	-0.621332	-0.484805	0.857867	F2D017	0	0	0	1	0	1	0	0	0	1	0	1	0	0	0	0	0	0	4	2	2	0	2	0
F2D9S4	Predicted protein OS=Hordeum vulgare subsp. vulgare OX=112509 PE=2 SV=1	High				Pf00011	-0.454816	0.981514	1.27868							1.16631	0.709808	2.66601							F2D9S4	0	0	0	0	0	0	0	0	0	0	0	1	0	0	0	0	0	0	1	0	1	0	0	0
F2DMI1	Predicted protein OS=Hordeum vulgare subsp. vulgare OX=112509 PE=2 SV=1	High			metal ion binding		-0.23593	1.01479	-0.193306	-0.83621	-0.0959052	-1.42905	2.01593	1.42216	0.527172	0.33812	0.893552	0.63627	1.62847		0.333718	0.34551	1.1452	0.628517	F2DMI1	0	0	0	0	0	0	1	0	0	0	0	0	1	0	0	0	0	0	2	0	1	1	2	0
A0A287F006	Uncharacterized protein OS=Hordeum vulgare subsp. vulgare OX=112509 PE=4 SV=1	High					-0.577814	-0.354794	-0.137982	-1.22507	-0.497264	-1.72075	-0.697136	-0.611914	0.188602	-0.761166	0.146049	-0.718956	-1.7046	-1.53156	-0.771273	0.735606	1.42171	0.248469	A0A287F006	0	0	0	0	0	-1	0	0	0	0	0	0	-1	-1	0	0	0	0	3	1	0	2	1	1
F2D675	Predicted protein OS=Hordeum vulgare subsp. vulgare OX=112509 PE=2 SV=1	High		membrane	protein binding																				F2D675	0	0	0	0	0	0	0	0	0	0	0	0	0	0	0	0	0	0	0	0	0	0	0	0
M0UEI5	Uncharacterized protein OS=Hordeum vulgare subsp. vulgare OX=112509 PE=4 SV=1	High	metabolic process	cytoplasm	RNA binding	Pf01132,Pf08207,Pf09285	0.635424	1.03199	0.945555	0.716624	-0.316615	0.566559	-0.0987426	0.390326	0.163313	-0.167673	-0.251235	0.0376957	0.104914	0.563102	-0.0558387	0.531891	-0.162542	0.146575	M0UEI5	0	0	0	0	0	0	0	0	0	0	0	0	0	0	0	0	0	0	0	0	0	0	0	0
A0A287KCZ1	SHSP domain-containing protein OS=Hordeum vulgare subsp. vulgare OX=112509 PE=3 SV=1	High																							A0A287KCZ1	0	0	0	0	0	0	0	0	0	0	0	0	0	0	0	0	0	0	0	0	0	0	0	0
A0A287LJX5	Malic enzyme OS=Hordeum vulgare subsp. vulgare OX=112509 PE=4 SV=1	High																							A0A287LJX5	0	0	0	0	0	0	0	0	0	0	0	0	0	0	0	0	0	0	0	0	0	0	0	0
Q9SME4	Glutathione peroxidase OS=Hordeum vulgare OX=4513 PE=2 SV=1	High	metabolic process;regulation of biological process;response to stimulus		antioxidant activity;catalytic activity	Pf00255,Pf00578,Pf08534	0.396147	0.532446	0.488542	1.60497	-0.143459	1.39612	-0.189273	0.235249	0.22237	0.60716	0.214875	1.2863	-0.96552	-0.157139	-0.129232	0.208555	-0.326953	0.842251	Q9SME4	0	0	0	1	0	0	0	0	0	0	0	0	0	0	0	0	0	0	1	1	0	0	1	0
F2DBE0	Succinate--CoA ligase [ADP-forming] subunit alpha, mitochondrial OS=Hordeum vulgare subsp. vulgare OX=112509 PE=2 SV=1	High	metabolic process	mitochondrion	catalytic activity;nucleotide binding	Pf00549,Pf02629,Pf13607	0.0397767	-0.251123	3.55157	1.10967	1.12094	0.304492	-0.0870312	-0.0148744	-0.386483	-0.867882	1.23508	0.553808	3.42256	1.53697	-0.263869				F2DBE0	0	0	1	0	0	0	0	0	0	0	0	0	1	1	0	0	0	0	3	1	0	2	1	1
F2CT30	Predicted protein OS=Hordeum vulgare subsp. vulgare OX=112509 PE=2 SV=1	High	metabolic process;regulation of biological process	nucleus	DNA binding;protein binding	Pf03634																			F2CT30	0	0	0	0	0	0	0	0	0	0	0	0	0	0	0	0	0	0	0	0	0	0	0	0
A0A287KEJ7	tRNA-synt_1 domain-containing protein OS=Hordeum vulgare subsp. vulgare OX=112509 PE=3 SV=2	High					0.965885	0.40118	-0.16244	0.15521	0.559682	0.682053	0.336544	0.310602	0.376509	0.874899	0.461933	1.15383	-0.266084	-0.818994	-0.910612	-0.453941	-0.998321	-0.310423	A0A287KEJ7	0	0	0	0	0	0	0	0	0	0	0	0	0	0	0	0	0	0	0	0	0	0	0	0
A0A287SMK1	H15 domain-containing protein OS=Hordeum vulgare subsp. vulgare OX=112509 PE=3 SV=1	High																							A0A287SMK1	0	0	0	0	0	0	0	0	0	0	0	0	0	0	0	0	0	0	0	0	0	0	0	0
M0V1W1	Peptidylprolyl isomerase OS=Hordeum vulgare subsp. vulgare OX=112509 PE=4 SV=1	High	metabolic process		catalytic activity	Pf00254	0.294299	0.0821871	0.291162	-1.02021	-0.660291	-1.58774	-0.133175	-0.144269	-0.487239	0.0840875	0.093599	-1.11716	-0.135232	-0.604468	0.665066	-0.532704	0.207658	-0.896543	M0V1W1	0	0	0	0	0	-1	0	0	0	0	0	0	0	0	0	0	0	0	1	1	0	0	0	0
F2DXJ9	Sucrose synthase OS=Hordeum vulgare subsp. vulgare OX=112509 PE=2 SV=1	High	metabolic process		catalytic activity	Pf00534,Pf00862,Pf13524,Pf13692																			F2DXJ9	0	0	0	0	0	0	0	0	0	0	0	0	0	0	0	0	0	0	0	0	0	0	0	0
A0A287IBY7	Uncharacterized protein OS=Hordeum vulgare subsp. vulgare OX=112509 PE=4 SV=1	High					1.85371	1.83941	0.514047	-0.202685	1.37761	1.51284	0.521279	0.285206	0.652189	0.49548	0.422561	1.20801	0.0630227	-1.47661	0.372966	0.0090737	0.219806	1.61069	A0A287IBY7	1	1	0	0	0	1	0	0	0	0	0	0	0	0	0	0	0	1	4	3	0	1	1	1
A0A287LTR2	Cysteine proteinase inhibitor OS=Hordeum vulgare subsp. vulgare OX=112509 PE=3 SV=1	High					0.733937	0.927603	0.888545	1.1687	-0.26744	0.000213962	0.431751	-0.0207673	-0.0221598	1.29687	0.778064	1.32909	-0.400442	-0.00178653	0.138155	1.41454	1.50114	1.45053	A0A287LTR2	0	0	0	0	0	0	0	0	0	0	0	0	0	0	0	0	1	0	1	0	0	1	0	1
A0A287WJT2	Ribosomal_L7Ae domain-containing protein OS=Hordeum vulgare subsp. vulgare OX=112509 PE=4 SV=1	High																							A0A287WJT2	0	0	0	0	0	0	0	0	0	0	0	0	0	0	0	0	0	0	0	0	0	0	0	0
A1E9M6	30S ribosomal protein S8, chloroplastic OS=Hordeum vulgare OX=4513 GN=rps8 PE=3 SV=1	High	metabolic process	ribosome	RNA binding;structural molecule activity	Pf00410	-1.0697	-0.0456148	1.29783	-0.424757	-0.902792	-0.675979	0.0523207	0.504481	0.0358975	-0.840039	-0.76697	-0.107029	1.9298	0.416706	0.818075	-0.254596	-0.0390015	-0.818224	A1E9M6	0	0	0	0	0	0	0	0	0	0	0	0	1	0	0	0	0	0	1	0	0	1	1	0
A0A287P154	ABC transporter domain-containing protein OS=Hordeum vulgare subsp. vulgare OX=112509 PE=4 SV=1	High					0.0192599	0.0847235	0.379662	0.303796	-0.277681	0.265479	0.394057	-0.0900796	-0.70534	-0.698801	0.370942	0.742853				1.2764	1.22883	0.782317	A0A287P154	0	0	0	0	0	0	0	0	0	0	0	0	0	0	0	0	0	0	0	0	0	0	0	0
A0A287QVX5	PEROXIDASE_4 domain-containing protein OS=Hordeum vulgare subsp. vulgare OX=112509 PE=3 SV=1	High					0.0764178	0.791594	0.148445	2.70607	0.552793	0.416536	0.46658	0.376821	0.512845	-0.852411	0.751518	0.526851							A0A287QVX5	0	0	0	1	0	0	0	0	0	0	0	0	0	0	0	0	0	0	1	1	0	0	1	0
F2EFK9	Predicted protein OS=Hordeum vulgare subsp. vulgare OX=112509 PE=2 SV=1	High	regulation of biological process			Pf06825	0.31586	0.203945	0.23499	0.407084	0.598673	0.134173	0.402352	-0.15331	0.173517	0.738966	0.109446	0.74565	0.0726385	-1.19528	0.318264	-0.428557	-0.0205237	0.745262	F2EFK9	0	0	0	0	0	0	0	0	0	0	0	0	0	0	0	0	0	0	0	0	0	0	0	0
F2DJP3	Predicted protein OS=Hordeum vulgare subsp. vulgare OX=112509 PE=2 SV=1	High			metal ion binding																				F2DJP3	0	0	0	0	0	0	0	0	0	0	0	0	0	0	0	0	0	0	0	0	0	0	0	0
A0A287K0Y8	Uncharacterized protein OS=Hordeum vulgare subsp. vulgare OX=112509 PE=4 SV=1	High																							A0A287K0Y8	0	0	0	0	0	0	0	0	0	0	0	0	0	0	0	0	0	0	0	0	0	0	0	0
A0A287FKI5	Uncharacterized protein OS=Hordeum vulgare subsp. vulgare OX=112509 PE=4 SV=1	High																							A0A287FKI5	0	0	0	0	0	0	0	0	0	0	0	0	0	0	0	0	0	0	0	0	0	0	0	0
A0A287PMF6	Uncharacterized protein OS=Hordeum vulgare subsp. vulgare OX=112509 PE=4 SV=1	High					-2.74215	-0.841595	0.47219	1.20824	0.609111	0.49362	-0.0734373	0.561621	-0.0486131	-1.22935	0.0703844	-1.12938	1.16573	0.0257732	0.229168	1.66281	1.99876	-0.326402	A0A287PMF6	-1	0	0	0	0	0	0	0	0	0	0	0	0	0	0	1	1	0	3	1	0	2	2	1
F2EJZ0	Predicted protein OS=Hordeum vulgare subsp. vulgare OX=112509 PE=2 SV=1	High	metabolic process	ribosome	structural molecule activity	Pf01655	0.518204	0.00156834	0.308631	1.05286	0.112022	0.215036	0.399882	-0.226084	0.423001	-0.262762	-0.225257	0.319553	0.374557	-0.314464	0.257118	-0.714687	-0.150738	-0.168853	F2EJZ0	0	0	0	0	0	0	0	0	0	0	0	0	0	0	0	0	0	0	0	0	0	0	0	0
F2DGI9	Predicted protein OS=Hordeum vulgare subsp. vulgare OX=112509 PE=2 SV=1	High			catalytic activity		-0.538478	-0.252809	0.445806	0.0965858	0.255472	-0.0480869	0.606952	0.844293	0.208284	0.139184	0.0787529	0.292798	0.273185	-0.578448	-1.23519	0.643044	0.609779	-0.059093	F2DGI9	0	0	0	0	0	0	0	0	0	0	0	0	0	0	0	0	0	0	0	0	0	0	0	0
A0A287U813	Uncharacterized protein OS=Hordeum vulgare subsp. vulgare OX=112509 PE=4 SV=1	High					-0.120943	-0.273032	-1.15747	0.509378	0.343216	1.36338	-0.455044	-0.090722	-0.0577918	-0.0635198	0.0921403	0.826822	-0.400591	-1.946	-1.59815	-1.005	-0.993246	-0.623054	A0A287U813	0	0	0	0	0	0	0	0	0	0	0	0	0	-1	-1	0	0	0	2	0	0	2	0	1
F2CZL7	Predicted protein OS=Hordeum vulgare subsp. vulgare OX=112509 PE=2 SV=1	High	metabolic process		RNA binding	Pf01176	0.198022	0.132585	-0.210383	0.189334	0.004362	0.593051	-0.716507	-0.72337	-0.835753	-0.0861768	-0.654755	-0.138564	-0.881953	0.0416568	-0.389341	-0.924998	-0.715594	-0.43741	F2CZL7	0	0	0	0	0	0	0	0	0	0	0	0	0	0	0	0	0	0	0	0	0	0	0	0
A0A287J4F3	Uncharacterized protein OS=Hordeum vulgare subsp. vulgare OX=112509 PE=3 SV=1	High																							A0A287J4F3	0	0	0	0	0	0	0	0	0	0	0	0	0	0	0	0	0	0	0	0	0	0	0	0
F2CS52	Predicted protein OS=Hordeum vulgare subsp. vulgare OX=112509 PE=2 SV=1	High				Pf01042	0.247963	0.449028	0.19422	-0.385286	-0.422847	-0.349568	-0.27416	-0.37588	-0.463328	-0.575897	-0.0447513	-0.258185	-0.596346	-0.495162	-0.526213	-0.176014	0.0522549	-0.0566714	F2CS52	0	0	0	0	0	0	0	0	0	0	0	0	0	0	0	0	0	0	0	0	0	0	0	0
F2CQN1	Predicted protein OS=Hordeum vulgare subsp. vulgare OX=112509 PE=2 SV=1	High	metabolic process	ribosome	structural molecule activity	Pf01198	0.0440104	-0.316748	0.24296	0.403553	0.406144	0.0515215	0.263786	0.199264	0.1504	0.38524	-0.028716	0.146037	-0.344173	-0.308256	-0.3765	-0.670014	-0.514059	0.288159	F2CQN1	0	0	0	0	0	0	0	0	0	0	0	0	0	0	0	0	0	0	0	0	0	0	0	0
A0A287VZQ8	Bet_v_1 domain-containing protein OS=Hordeum vulgare subsp. vulgare OX=112509 PE=4 SV=1	High																							A0A287VZQ8	0	0	0	0	0	0	0	0	0	0	0	0	0	0	0	0	0	0	0	0	0	0	0	0
A0A287FIQ8	Uncharacterized protein OS=Hordeum vulgare subsp. vulgare OX=112509 PE=4 SV=1	High					0.923461	0.649257	0.473316	2.57744	1.46636	1.7649	0.351692	-0.367003	-0.354865	1.30043	-0.0853037	1.22564	-0.40888	-1.30774	-0.158446	0.834598	0.223811	1.5221	A0A287FIQ8	0	0	0	1	0	1	0	0	0	0	0	0	0	0	0	0	0	1	3	2	0	1	1	0
A0A287EDX0	Uncharacterized protein OS=Hordeum vulgare subsp. vulgare OX=112509 PE=4 SV=1	High																							A0A287EDX0	0	0	0	0	0	0	0	0	0	0	0	0	0	0	0	0	0	0	0	0	0	0	0	0
F2CQF1	Predicted protein OS=Hordeum vulgare subsp. vulgare OX=112509 PE=2 SV=1	High					-0.529715	-0.901135	-0.798434	0.702967	0.492794	0.118289	1.00505	0.835492	0.776954	1.07315	0.570078	0.973433	0.117648	-0.720743	0.132633	0.265017	-0.185265	0.646528	F2CQF1	0	0	0	0	0	0	0	0	0	0	0	0	0	0	0	0	0	0	0	0	0	0	0	0
A0A287SBZ3	Uncharacterized protein OS=Hordeum vulgare subsp. vulgare OX=112509 PE=3 SV=1	High					0.032882	0.0385828	-0.426023	-0.272645	0.621402	-0.403022	-0.198681	-0.330263	-0.408053	-0.288441	0.143327	-0.604505	-0.511267	-0.309194	0.348674	-0.349581	0.0193632	-0.265464	A0A287SBZ3	0	0	0	0	0	0	0	0	0	0	0	0	0	0	0	0	0	0	0	0	0	0	0	0
M0WUF3	Fe-S cluster assembly protein DRE2 OS=Hordeum vulgare subsp. vulgare OX=112509 PE=3 SV=1	High	cell death;cell organization and biogenesis;metabolic process	cytoplasm;mitochondrion	metal ion binding	Pf05093	-0.055251	0.617439	0.339316	1.94145	2.03172	1.88138	-0.0221622	-0.575936	-0.764905	1.31871	0.0761711	1.10966	-2.08229	0.6813	-0.0174128			0.932217	M0WUF3	0	0	0	1	1	1	0	0	0	0	0	0	-1	0	0	0	0	0	4	3	0	1	2	1
A0A287KPT6	Uncharacterized protein OS=Hordeum vulgare subsp. vulgare OX=112509 PE=3 SV=1	High																							A0A287KPT6	0	0	0	0	0	0	0	0	0	0	0	0	0	0	0	0	0	0	0	0	0	0	0	0
M0W1G3	Uncharacterized protein OS=Hordeum vulgare subsp. vulgare OX=112509 PE=4 SV=1	High	metabolic process	ribosome	structural molecule activity	Pf04839	0.497834	1.16667	-0.823589	0.779771	1.92852	0.280196	0.422837	-0.817817	-0.725661	-1.12658	-0.578751	-1.07184	2.3865	-0.281183	0.320329	2.24227	2.57807	2.1678	M0W1G3	0	0	0	0	1	0	0	0	0	0	0	0	1	0	0	1	1	1	5	1	0	4	2	2
A0A287V200	CobW C-terminal domain-containing protein OS=Hordeum vulgare subsp. vulgare OX=112509 PE=4 SV=1	High					-0.834588	-0.270366	-0.222909	-0.867243	-0.647695	-0.0840838	-0.330945	0.214398	-0.110144	-0.399812	-0.0510058	0.346753	0.16057	1.23673	1.00173	-0.106967	0.364256	-0.131066	A0A287V200	0	0	0	0	0	0	0	0	0	0	0	0	0	0	0	0	0	0	0	0	0	0	0	0
F2DDR0	Predicted protein OS=Hordeum vulgare subsp. vulgare OX=112509 PE=2 SV=1	High	defense response;metabolic process;regulation of biological process;response to stimulus	cytoplasm;extracellular	catalytic activity	Pf00501,Pf13193	-0.50803	-0.24341	0.0191087	1.62793		1.83844	-0.621135	-0.845449	0.15159	-0.221508	-0.141824	0.676829	-2.55978	-0.253572	-1.06819	-0.978027	-2.81763		F2DDR0	0	0	0	1	0	1	0	0	0	0	0	0	-1	0	0	0	-1	0	4	2	0	2	2	1
M0XIA3	Uncharacterized protein OS=Hordeum vulgare subsp. vulgare OX=112509 PE=4 SV=1	High	transport			Pf03398	1.17317	0.842314	0.363939	-0.12251	-0.556004	-1.64673	0.556705	0.122827	0.440056	-0.681399	0.493401	0.307638	0.469201	0.288582	1.08104	0.0551443	0.147694	-0.954784	M0XIA3	0	0	0	0	0	-1	0	0	0	0	0	0	0	0	0	0	0	0	1	1	0	0	0	0
A0A287NUN2	Uncharacterized protein OS=Hordeum vulgare subsp. vulgare OX=112509 PE=4 SV=1	High					1.59229	0.272293	0.0551763	-0.678572	0.491305	-0.279409	1.56799	1.40346	0.295558	0.586109	0.935376	0.123041				-0.696593	0.0286174		A0A287NUN2	1	0	0	0	0	0	1	0	0	0	0	0	0	0	0	0	0	0	2	1	1	0	2	0
F2E8F5	Predicted protein OS=Hordeum vulgare subsp. vulgare OX=112509 PE=2 SV=1	High				Pf04862																			F2E8F5	0	0	0	0	0	0	0	0	0	0	0	0	0	0	0	0	0	0	0	0	0	0	0	0
M0UFX2	Uncharacterized protein OS=Hordeum vulgare subsp. vulgare OX=112509 PE=3 SV=1	High	metabolic process	ribosome	structural molecule activity	Pf00281,Pf00673	-1.03741	0.914371	0.814642	-0.096363	0.311388	0.100889	0.0259724	-0.129414	-0.455865	0.358171	-0.390962	-0.341112	0.802347	0.0862347	1.01339	-0.00316804	0.627711	-1.88404	M0UFX2	0	0	0	0	0	0	0	0	0	0	0	0	0	0	0	0	0	-1	1	0	0	1	0	0
F2DBC0	Predicted protein OS=Hordeum vulgare subsp. vulgare OX=112509 PE=2 SV=1	High	regulation of biological process;response to stimulus		DNA binding	Pf01381,Pf08523,Pf12844																			F2DBC0	0	0	0	0	0	0	0	0	0	0	0	0	0	0	0	0	0	0	0	0	0	0	0	0
A0A287P2R3	Thioredoxin domain-containing protein OS=Hordeum vulgare subsp. vulgare OX=112509 PE=4 SV=1	High					0.0626561	0.846067	1.51596	0.693218	0.368449	-0.125986	0.621052	0.14462	0.098043	-1.17896	0.0434395	-1.22055				0.548434	1.79712	-0.0286421	A0A287P2R3	0	0	1	0	0	0	0	0	0	0	0	0	0	0	0	0	1	0	2	1	0	1	0	1
M0X6B0	Uncharacterized protein OS=Hordeum vulgare subsp. vulgare OX=112509 PE=4 SV=1	High	transport		metal ion binding	Pf05051																			M0X6B0	0	0	0	0	0	0	0	0	0	0	0	0	0	0	0	0	0	0	0	0	0	0	0	0
A0A287PUS9	Uncharacterized protein OS=Hordeum vulgare subsp. vulgare OX=112509 PE=4 SV=1	High					0.344384	0.33334	-0.672109	2.91041	1.88552	2.53535	0.665739	0.754217	0.62799	1.45432	0.287261	2.02031	1.17552	-0.537357	-0.204011	0.632897	1.2636	2.10538	A0A287PUS9	0	0	0	1	1	1	0	0	0	0	0	1	0	0	0	0	0	1	5	3	1	1	1	1
A0A287WJL1	Uncharacterized protein OS=Hordeum vulgare subsp. vulgare OX=112509 PE=3 SV=1	High					0.250528	0.0295526	0.0161671	0.128824	0.37367	-0.213255	0.247921	0.285995	0.287807	0.652426	0.285649	0.677529	-0.401297	-0.768883	-0.0172615				A0A287WJL1	0	0	0	0	0	0	0	0	0	0	0	0	0	0	0	0	0	0	0	0	0	0	0	0
A0A287HTX4	NTF2 domain-containing protein OS=Hordeum vulgare subsp. vulgare OX=112509 PE=4 SV=1	High					-0.585647	-0.490189	-0.913158	0.682782	0.743811	0.00118579	-0.0775057	-0.223675	-0.300137	1.58819	0.847193	1.03464		-0.623786	1.55195		0.501108	0.74599	A0A287HTX4	0	0	0	0	0	0	0	0	0	1	0	0	0	0	1	0	0	0	2	0	1	1	1	0
A0A287HP97	SUMO-activating enzyme subunit OS=Hordeum vulgare subsp. vulgare OX=112509 PE=3 SV=1	High					0.123699	-0.186008	-0.69452	0.395511	0.0997082	0.625147	0.357455	0.375169	0.0612669	0.32735	0.278021	0.997154	-0.0181616	-0.0877712	-1.10697	-0.0810344	-0.325531	-0.547031	A0A287HP97	0	0	0	0	0	0	0	0	0	0	0	0	0	0	0	0	0	0	0	0	0	0	0	0
A0A287ULF4	Uncharacterized protein OS=Hordeum vulgare subsp. vulgare OX=112509 PE=4 SV=1	High					-0.066121	0.360998	0.225845	1.08487	0.277307	0.847723	-0.410071	-0.116466	-0.403394	0.42407	0.465223	0.779665	0.271287	0.0196954	0.116633	0.154136	-0.149216	0.425414	A0A287ULF4	0	0	0	0	0	0	0	0	0	0	0	0	0	0	0	0	0	0	0	0	0	0	0	0
A0A287FC58	Alpha-galactosidase OS=Hordeum vulgare subsp. vulgare OX=112509 PE=3 SV=1	High					-0.397779	-0.245011	-0.33622	0.488459	0.424148	0.623893	-0.287511	-0.130794	-0.0267633	0.180933	0.367544	0.447425	-0.937554	-0.116991	0.354893	-0.215582	0.380332	0.144917	A0A287FC58	0	0	0	0	0	0	0	0	0	0	0	0	0	0	0	0	0	0	0	0	0	0	0	0
M0UUA6	Uncharacterized protein OS=Hordeum vulgare subsp. vulgare OX=112509 PE=4 SV=1	High																							M0UUA6	0	0	0	0	0	0	0	0	0	0	0	0	0	0	0	0	0	0	0	0	0	0	0	0
A0A287K2D3	Non-specific lipid-transfer protein OS=Hordeum vulgare subsp. vulgare OX=112509 PE=3 SV=1	High					-0.83084	-0.268811	-0.547952	1.58474	-0.935354	0.430756	-0.507539	-1.01223	-0.443551	1.52369	-0.307865	2.08896	0.0201542	0.0274108	0.277486	0.82797	-0.0807282	0.65644	A0A287K2D3	0	0	0	1	0	0	0	0	0	1	0	1	0	0	0	0	0	0	3	1	2	0	2	0
A0A287PUW7	Uncharacterized protein OS=Hordeum vulgare subsp. vulgare OX=112509 PE=4 SV=1	High					-1.1993	-2.05192	-1.39789	1.15483	0.3035	1.10129	0.293909	-0.0129975	-0.18974	1.26339	0.0494863	0.836982	-0.649439	-1.22442	-1.98997	-0.292719	-0.563218	-1.00069	A0A287PUW7	0	-1	0	0	0	0	0	0	0	0	0	0	0	0	-1	0	0	0	2	1	0	1	0	1
A0A287KNX3	TPT domain-containing protein OS=Hordeum vulgare subsp. vulgare OX=112509 PE=4 SV=1	High																							A0A287KNX3	0	0	0	0	0	0	0	0	0	0	0	0	0	0	0	0	0	0	0	0	0	0	0	0
A0A287Q514	Histone H2A OS=Hordeum vulgare subsp. vulgare OX=112509 PE=3 SV=1	High					-0.834	-1.1347	-0.527418	0.309568	-1.39819	-0.186524	0.414971	0.188761	-0.12218	0.138916	-1.08717	0.439846				-0.421476	-1.4901	-2.78597	A0A287Q514	0	0	0	0	0	0	0	0	0	0	0	0	0	0	0	0	0	0	0	0	0	0	0	0
A0A287NVQ0	14_3_3 domain-containing protein OS=Hordeum vulgare subsp. vulgare OX=112509 PE=3 SV=1	High																							A0A287NVQ0	0	0	0	0	0	0	0	0	0	0	0	0	0	0	0	0	0	0	0	0	0	0	0	0
A0A287G0Z3	Uncharacterized protein OS=Hordeum vulgare subsp. vulgare OX=112509 PE=4 SV=1	High					-0.0224017	-0.532826	-0.536943	0.760839	1.85896	1.70313	0.93022	1.15262	1.06084	0.513156	0.607271	1.26012	-0.0557212	-2.38469	-0.201078	-0.0879923	-0.255154	0.355381	A0A287G0Z3	0	0	0	0	1	1	0	0	0	0	0	0	0	-1	0	0	0	0	3	2	0	1	0	2
F2EDI2	Predicted protein OS=Hordeum vulgare subsp. vulgare OX=112509 PE=2 SV=1	High			RNA binding	Pf00076																			F2EDI2	0	0	0	0	0	0	0	0	0	0	0	0	0	0	0	0	0	0	0	0	0	0	0	0
F2CW48	40S ribosomal protein S25 OS=Hordeum vulgare subsp. vulgare OX=112509 PE=2 SV=1	High				Pf03297,Pf12802,Pf13412	0.131855	0.297126	0.198001	0.842427	0.00775533	0.615865	0.0306567	-0.218838	-0.0199021	0.58379	-0.154868	0.560204	-0.0418497	-0.461414	0.284965	0.678524	0.125584	1.05758	F2CW48	0	0	0	0	0	0	0	0	0	0	0	0	0	0	0	0	0	0	0	0	0	0	0	0
A0A287H8R8	Uncharacterized protein OS=Hordeum vulgare subsp. vulgare OX=112509 PE=4 SV=1	High					-0.0471134	-0.0531525	0.00874529	1.00864	0.888181	1.03199	-0.210104	0.00347067	-0.248715	-0.294451	-0.211224	0.0769257	0.0925083	-0.017628	-0.286795	-0.260979	-0.112185	0.0641191	A0A287H8R8	0	0	0	0	0	0	0	0	0	0	0	0	0	0	0	0	0	0	0	0	0	0	0	0
A0A287HEP6	Uncharacterized protein OS=Hordeum vulgare subsp. vulgare OX=112509 PE=4 SV=1	High					-0.0793879	-0.453351	-0.128705	1.33824	-1.12664	-1.05934	0.0614091	0.563247	0.232488	0.590436	-0.436738	1.34375	-0.776643	-0.939111	0.380728	-0.349283	0.984752	-0.157367	A0A287HEP6	0	0	0	0	0	0	0	0	0	0	0	0	0	0	0	0	0	0	0	0	0	0	0	0
A0A287T216	Uncharacterized protein OS=Hordeum vulgare subsp. vulgare OX=112509 PE=4 SV=1	High																							A0A287T216	0	0	0	0	0	0	0	0	0	0	0	0	0	0	0	0	0	0	0	0	0	0	0	0
A0A287HSC7	PPIase cyclophilin-type domain-containing protein OS=Hordeum vulgare subsp. vulgare OX=112509 PE=4 SV=1	High																							A0A287HSC7	0	0	0	0	0	0	0	0	0	0	0	0	0	0	0	0	0	0	0	0	0	0	0	0
A0A287T700	Uncharacterized protein OS=Hordeum vulgare subsp. vulgare OX=112509 PE=4 SV=1	High					-0.714294	0.495909	-1.05103	-0.00421987	0.105178	0.278725	0.087901	0.137693	0.304416	-1.30433	0.631829	-1.53349	-1.87376	-0.534479	-0.634678	-1.82088	-2.27027	-2.07366	A0A287T700	0	0	0	0	0	0	0	0	0	0	0	-1	-1	0	0	-1	-1	-1	5	0	1	4	2	1
A0A287J5V4	cwf21 domain-containing protein OS=Hordeum vulgare subsp. vulgare OX=112509 PE=4 SV=1	High					0.618291	1.22539	-0.284179	1.05936	2.32378	1.70611	1.54805	0.85054	2.15435	1.66097	0.999805	1.6111	0.256679	0.993678	-0.657256	-0.483028	0.991152	0.525528	A0A287J5V4	0	0	0	0	1	1	1	0	1	1	0	1	0	0	0	0	0	0	6	2	4	0	2	1
F2CWP9	Predicted protein OS=Hordeum vulgare subsp. vulgare OX=112509 PE=2 SV=1	High	metabolic process			Pf13519	0.464116	0.112901	0.201222	0.457419	-0.124485	-0.387592	0.860684	0.665423	0.879272	0.973493	0.971675	0.845508	-0.713342	0.0376476	0.117042	1.07182	0.262709	1.86566	F2CWP9	0	0	0	0	0	0	0	0	0	0	0	0	0	0	0	0	0	1	1	0	0	1	0	0
A0A287HJF8	GRAM domain-containing protein OS=Hordeum vulgare subsp. vulgare OX=112509 PE=4 SV=1	High					-0.637262	-0.686489	0.0558317	-0.880906	-0.65071	-0.109403	0.126364	-0.788675	0.491529	0.854455	0.0452446	1.50579				1.09657	0.88154	1.29509	A0A287HJF8	0	0	0	0	0	0	0	0	0	0	0	1	0	0	0	0	0	0	1	0	1	0	0	0
A0A287M8N8	Uncharacterized protein OS=Hordeum vulgare subsp. vulgare OX=112509 PE=3 SV=1	High					0.593164	1.50952	2.35535	0.359809	0.20412	0.508194	1.0759	0.857998	1.2293	0.138653	1.32989	1.08744				1.62645	2.61927	1.74454	A0A287M8N8	0	1	1	0	0	0	0	0	0	0	0	0	0	0	0	1	1	1	5	2	0	3	1	2
Q9SDM1	Chlorophyll a-b binding protein 1B-21, chloroplastic OS=Hordeum vulgare OX=4513 GN=LHC Ib-21 PE=1 SV=1	High	metabolic process	membrane	metal ion binding	Pf00504																			Q9SDM1	0	0	0	0	0	0	0	0	0	0	0	0	0	0	0	0	0	0	0	0	0	0	0	0
F2D620	Predicted protein (Fragment) OS=Hordeum vulgare subsp. vulgare OX=112509 PE=2 SV=1	High	metabolic process		RNA binding	Pf06273	0.280655	0.444992	-0.372347	-0.33674	0.414878	-0.132216	0.530228	0.212208	0.172963	0.659605	1.01283	0.754748	0.688502	0.185134	0.632442	0.0279125	0.425484	1.122	F2D620	0	0	0	0	0	0	0	0	0	0	0	0	0	0	0	0	0	0	0	0	0	0	0	0
M0ZDL4	Uncharacterized protein OS=Hordeum vulgare subsp. vulgare OX=112509 PE=4 SV=1	High			protein binding		-0.633069	-0.0072852	-0.395239	-0.436474	-0.150497	-0.688551	-0.714569	0.02417	-0.744864	0.134992	0.363505	0.505826	-0.422378	-0.029489	-0.0459205	-1.00555	-0.864057	-1.92514	M0ZDL4	0	0	0	0	0	0	0	0	0	0	0	0	0	0	0	0	0	-1	1	0	0	1	0	0
A0A287PRJ1	Peptidase A1 domain-containing protein OS=Hordeum vulgare subsp. vulgare OX=112509 PE=3 SV=1	High																							A0A287PRJ1	0	0	0	0	0	0	0	0	0	0	0	0	0	0	0	0	0	0	0	0	0	0	0	0
A0A287ETV5	PDZ domain-containing protein OS=Hordeum vulgare subsp. vulgare OX=112509 PE=4 SV=1	High					-0.344322	-1.30456	-0.698769	0.0760065	0.148983	-0.334098	-0.84142	-0.300582	-0.863298	0.120392	0.402031	0.285994	0.939932	-1.02448	0.83027	-0.392216	-0.600909	-0.154285	A0A287ETV5	0	0	0	0	0	0	0	0	0	0	0	0	0	0	0	0	0	0	0	0	0	0	0	0
F2DI46	Predicted protein OS=Hordeum vulgare subsp. vulgare OX=112509 PE=2 SV=1	High	regulation of biological process			Pf02893																			F2DI46	0	0	0	0	0	0	0	0	0	0	0	0	0	0	0	0	0	0	0	0	0	0	0	0
A0A287ISH2	Ribosomal_L23eN domain-containing protein OS=Hordeum vulgare subsp. vulgare OX=112509 PE=4 SV=2	High					0.879209	0.916253	0.411587	0.772505	-0.184086	-0.0338451	0.0544734	-0.484458	-0.00184471	0.561217	0.0587195	0.48707	-0.401364	-0.357191	0.370219	0.131523	-0.0418862	1.06366	A0A287ISH2	0	0	0	0	0	0	0	0	0	0	0	0	0	0	0	0	0	0	0	0	0	0	0	0
F2CWX5	Glycosyltransferase (Fragment) OS=Hordeum vulgare subsp. vulgare OX=112509 PE=2 SV=1	High	metabolic process		catalytic activity	Pf00201																			F2CWX5	0	0	0	0	0	0	0	0	0	0	0	0	0	0	0	0	0	0	0	0	0	0	0	0
M0YA23	ParB domain-containing protein OS=Hordeum vulgare subsp. vulgare OX=112509 PE=4 SV=1	High	metabolic process		antioxidant activity;catalytic activity	Pf02195	-0.794006	0.148513	-0.308288	0.345482	0.781899	1.01753	0.185612	-1.07672	0.297394	-0.0767895	0.100021	0.342377	-0.415397	-0.0967937	0.969137	-0.918342	-0.945269	-0.813284	M0YA23	0	0	0	0	0	0	0	0	0	0	0	0	0	0	0	0	0	0	0	0	0	0	0	0
F2DUY9	Predicted protein OS=Hordeum vulgare subsp. vulgare OX=112509 PE=2 SV=1	High	metabolic process	ribosome	RNA binding;structural molecule activity	Pf00203	-0.585127	-0.0900171	-0.19544	-0.300194	-0.0376009	0.224818	-0.116438	-0.101646	-0.670404	0.232145	0.801102	-0.367998	-0.253689	-1.19307	-0.096309	-0.671543	0.700001	0.032977	F2DUY9	0	0	0	0	0	0	0	0	0	0	0	0	0	0	0	0	0	0	0	0	0	0	0	0
A0A287PDR0	Ribonucloprotein OS=Hordeum vulgare subsp. vulgare OX=112509 PE=3 SV=1	High					-0.400252	0.274866	0.00581598	-0.57856	-0.369328	-0.472688	-0.583768	-0.617474	-0.402469	-0.371133	-0.471255	-0.465066	-1.06369	0.762719	-0.491728	-0.98032	-1.31508	-1.32622	A0A287PDR0	0	0	0	0	0	0	0	0	0	0	0	0	0	0	0	0	0	0	0	0	0	0	0	0
F2DST6	Predicted protein OS=Hordeum vulgare subsp. vulgare OX=112509 PE=2 SV=1	High				Pf10151	0.868268	0.532588	0.0312292	0.93503	1.32371	0.539967	-0.584691	-0.783137	0.248559	0.644955	0.638766	0.844255	-1.318	-0.53175	-0.0441846	0.507318	0.0644405	1.09519	F2DST6	0	0	0	0	0	0	0	0	0	0	0	0	0	0	0	0	0	0	0	0	0	0	0	0
A0A287HAC0	Xylose isomerase OS=Hordeum vulgare subsp. vulgare OX=112509 PE=3 SV=1	High																							A0A287HAC0	0	0	0	0	0	0	0	0	0	0	0	0	0	0	0	0	0	0	0	0	0	0	0	0
A0A287E500	Uncharacterized protein OS=Hordeum vulgare subsp. vulgare OX=112509 PE=4 SV=1	High																							A0A287E500	0	0	0	0	0	0	0	0	0	0	0	0	0	0	0	0	0	0	0	0	0	0	0	0
A0A287SNS2	AAI domain-containing protein OS=Hordeum vulgare subsp. vulgare OX=112509 PE=3 SV=1	High																							A0A287SNS2	0	0	0	0	0	0	0	0	0	0	0	0	0	0	0	0	0	0	0	0	0	0	0	0
Q8LKZ4	CONSTANS-like protein OS=Hordeum vulgare subsp. vulgare OX=112509 GN=CO3 PE=2 SV=1	High		nucleus	metal ion binding;protein binding	Pf06203																			Q8LKZ4	0	0	0	0	0	0	0	0	0	0	0	0	0	0	0	0	0	0	0	0	0	0	0	0
A0A287X019	Uncharacterized protein OS=Hordeum vulgare subsp. vulgare OX=112509 PE=4 SV=1	High																							A0A287X019	0	0	0	0	0	0	0	0	0	0	0	0	0	0	0	0	0	0	0	0	0	0	0	0
A0A287EWW0	J domain-containing protein OS=Hordeum vulgare subsp. vulgare OX=112509 PE=4 SV=1	High					-1.42375	-1.48008	-0.86078	1.23148	0.507633	0.372366	-1.09601	-0.389104	-0.770487	-0.208033	0.644382	-0.654764	-0.397726		0.692161	-1.30101		-3.7612	A0A287EWW0	0	0	0	0	0	0	0	0	0	0	0	0	0	0	0	0	0	-1	1	0	0	1	0	0
A0A287UH00	2-C-methyl-D-erythritol 2,4-cyclodiphosphate synthase OS=Hordeum vulgare subsp. vulgare OX=112509 PE=3 SV=1	High																							A0A287UH00	0	0	0	0	0	0	0	0	0	0	0	0	0	0	0	0	0	0	0	0	0	0	0	0
F2EHA8	Predicted protein OS=Hordeum vulgare subsp. vulgare OX=112509 PE=2 SV=1	High	regulation of biological process	extracellular	enzyme regulator activity		0.202499	0.609904	-0.494568	-0.0743313	-1.77462	-0.958019	-0.442376	-1.27524	-0.910858	0.405197	-1.5188	-0.881194	-0.623686	-0.407705	0.0573678	-0.385618	-2.05206	-0.371552	F2EHA8	0	0	0	0	-1	0	0	0	0	0	-1	0	0	0	0	0	-1	0	3	1	1	1	0	3
A0A287INY8	Uncharacterized protein OS=Hordeum vulgare subsp. vulgare OX=112509 PE=4 SV=1	High					0.585226	0.699679	0.645837	0.840372	1.00246	1.05641	-0.00813852	-0.538707	-0.411578	-0.0608796	0.764157	0.192245	-1.5215		0.461401	-1.13951	-0.719467	0.0127629	A0A287INY8	0	0	0	0	0	0	0	0	0	0	0	0	-1	0	0	0	0	0	1	0	0	1	1	0
A0A287RFP2	Dihydrolipoamide acetyltransferase component of pyruvate dehydrogenase complex OS=Hordeum vulgare subsp. vulgare OX=112509 PE=3 SV=1	High					-0.138808	-0.738358	-0.142779	0.983997	-0.276967	1.68248	0.0926509	0.757459	0.140985	0.904948	-0.905516	1.41276	-1.46947			-1.75436		0.127058	A0A287RFP2	0	0	0	0	0	1	0	0	0	0	0	0	0	0	0	-1	0	0	2	1	0	1	1	0
F2EJV2	Predicted protein OS=Hordeum vulgare subsp. vulgare OX=112509 PE=2 SV=1	High	cell organization and biogenesis;regulation of biological process	cytoskeleton	catalytic activity;metal ion binding;motor activity;protein binding	Pf01576,Pf03234,Pf05557,Pf06160,Pf12763,Pf13202,Pf13499,Pf13833	-0.457479	0.340667	-0.777217	1.4209	1.17578	0.736506	0.738265	0.679969	1.52409	0.0578794	-0.284138	-0.465617	-0.136016	-0.353142	-0.83783				F2EJV2	0	0	0	0	0	0	0	0	1	0	0	0	0	0	0	0	0	0	1	0	1	0	0	0
A0A287WQR6	FHA domain-containing protein OS=Hordeum vulgare subsp. vulgare OX=112509 PE=4 SV=1	High					-0.162893	0.0781369	0.320151	-1.91755	-0.323882	-0.504591	0.460083	1.98317	1.87023	0.580731	0.212993	-0.345805				-1.47792		0.571694	A0A287WQR6	0	0	0	-1	0	0	0	1	1	0	0	0	0	0	0	0	0	0	3	1	2	0	1	1
A0A287QPI2	Uncharacterized protein OS=Hordeum vulgare subsp. vulgare OX=112509 PE=4 SV=1	High					-0.161806	-0.506877	-0.740529	1.72133	1.21859	2.1247	0.292922	0.708787	-0.0978834	2.08603	1.52089	1.59254	0.834673	-0.200119	-0.146208	0.301445	0.584663	0.763059	A0A287QPI2	0	0	0	1	0	1	0	0	0	1	1	1	0	0	0	0	0	0	5	2	3	0	2	1
A0A287GHX1	Protein phosphatase OS=Hordeum vulgare subsp. vulgare OX=112509 PE=3 SV=1	High																							A0A287GHX1	0	0	0	0	0	0	0	0	0	0	0	0	0	0	0	0	0	0	0	0	0	0	0	0
A0A287L862	AMP-binding domain-containing protein OS=Hordeum vulgare subsp. vulgare OX=112509 PE=4 SV=1	High																							A0A287L862	0	0	0	0	0	0	0	0	0	0	0	0	0	0	0	0	0	0	0	0	0	0	0	0
A0A287E0K2	PKS_ER domain-containing protein OS=Hordeum vulgare subsp. vulgare OX=112509 PE=4 SV=1	High																							A0A287E0K2	0	0	0	0	0	0	0	0	0	0	0	0	0	0	0	0	0	0	0	0	0	0	0	0
F2DF91	Predicted protein OS=Hordeum vulgare subsp. vulgare OX=112509 PE=2 SV=1	High	metabolic process			Pf02861	0.398293	0.484168	0.0551035	-0.567796	-0.525028	-1.29379	-0.239136	-0.525153	-0.467057	-0.661305	-0.0839261	-0.697621	-0.182436	-0.214535	0.244845	0.0664925	-0.233971	0.046233	F2DF91	0	0	0	0	0	0	0	0	0	0	0	0	0	0	0	0	0	0	0	0	0	0	0	0
A0A287UW94	Uncharacterized protein OS=Hordeum vulgare subsp. vulgare OX=112509 PE=3 SV=1	High					-0.0303526	-0.576489	1.65545	0.960341	-0.0445029	0.400902	-0.0534081	0.675653	0.517502	-1.1766	-0.884572	-0.619872				1.37619	1.61839	1.06051	A0A287UW94	0	0	1	0	0	0	0	0	0	0	0	0	0	0	0	0	1	0	2	1	0	1	0	1
A0A287I4Z8	Uncharacterized protein OS=Hordeum vulgare subsp. vulgare OX=112509 PE=4 SV=1	High					-2.93994	-1.20701	-3.40155	0.421555	0.264175	0.538673	1.86218	2.34402	2.01375	0.410226	-0.146597	-0.176869	-0.00590566	-0.582191	-0.749366	-0.713531	-3.20328	-0.0103448	A0A287I4Z8	-1	0	-1	0	0	0	1	1	1	0	0	0	0	0	0	0	-1	0	6	2	3	1	2	2
A0A287V2I9	AAA domain-containing protein OS=Hordeum vulgare subsp. vulgare OX=112509 PE=3 SV=1	High					-0.369294	-0.326082	-0.220701	1.3304	1.75272	1.27475	-1.01306	-0.540603	-0.64116	0.636212	0.169547	1.04162	-0.817055	0.184983	-0.17942	0.104348	-0.265496	-1.74626	A0A287V2I9	0	0	0	0	1	0	0	0	0	0	0	0	0	0	0	0	0	-1	2	1	0	1	0	1
A0A287TBK2	Uncharacterized protein OS=Hordeum vulgare subsp. vulgare OX=112509 PE=4 SV=1	High																							A0A287TBK2	0	0	0	0	0	0	0	0	0	0	0	0	0	0	0	0	0	0	0	0	0	0	0	0
A0A287V0B8	Rieske domain-containing protein OS=Hordeum vulgare subsp. vulgare OX=112509 PE=4 SV=1	High																							A0A287V0B8	0	0	0	0	0	0	0	0	0	0	0	0	0	0	0	0	0	0	0	0	0	0	0	0
E9LFE6	Chloride channel 1 OS=Hordeum vulgare subsp. vulgare OX=112509 GN=ClC1 PE=2 SV=1	High	transport	membrane	transporter activity	Pf00571,Pf00654	0.230408	-0.147382	-0.191338	1.56086	0.855071	1.76885	-0.105473	-0.434902	0.45665	1.40325	0.084713	1.63656	0.0962856	-0.57476	-0.0162296	-0.790462		-0.241141	E9LFE6	0	0	0	1	0	1	0	0	0	0	0	1	0	0	0	0	0	0	3	2	1	0	1	0
A0A287LPJ5	Uncharacterized protein OS=Hordeum vulgare subsp. vulgare OX=112509 PE=4 SV=1	High					0.165512	0.792152	-0.747265	-1.52212	0.282529	-2.03984	0.322692	-0.106441	-0.394842	-1.0177	-0.536033	-0.865282	0.0225257	0.211623	-0.523217	-0.14232	0.0529177	0.0697107	A0A287LPJ5	0	0	0	-1	0	-1	0	0	0	0	0	0	0	0	0	0	0	0	2	2	0	0	1	0
M0YV31	NADPH-protochlorophyllide oxidoreductase OS=Hordeum vulgare subsp. vulgare OX=112509 PE=3 SV=1	High	metabolic process		catalytic activity	Pf00106																			M0YV31	0	0	0	0	0	0	0	0	0	0	0	0	0	0	0	0	0	0	0	0	0	0	0	0
M0UMZ9	Uncharacterized protein OS=Hordeum vulgare subsp. vulgare OX=112509 PE=4 SV=1	High		membrane			-1.42356	-0.459868	-0.14205	0.0834225	0.564376	-0.0783184	-0.16343	-0.576116	-0.990687	-0.793755	-0.0127491	-1.26148	0.0935125	-0.425725	0.518763	-0.697451	-0.760598	-1.59888	M0UMZ9	0	0	0	0	0	0	0	0	0	0	0	0	0	0	0	0	0	-1	1	0	0	1	0	0
F2DIC1	Peptidylprolyl isomerase (Fragment) OS=Hordeum vulgare subsp. vulgare OX=112509 PE=2 SV=1	High	metabolic process	membrane	catalytic activity	Pf00254																			F2DIC1	0	0	0	0	0	0	0	0	0	0	0	0	0	0	0	0	0	0	0	0	0	0	0	0
F2D030	Predicted protein OS=Hordeum vulgare subsp. vulgare OX=112509 PE=2 SV=1	High	regulation of biological process	mitochondrion	enzyme regulator activity	Pf01722,Pf02657	1.04028	1.41344	1.68345	0.371594	-0.687145	0.0524138	1.26472	-0.035352	-0.33852	1.08302	0.85924	0.776221	-0.0681373	1.13638	0.297863	-0.407139	-0.743558	2.17046	F2D030	0	0	1	0	0	0	0	0	0	0	0	0	0	0	0	0	0	1	2	1	0	1	0	0
A0A287PKK6	Ribosomal_S10 domain-containing protein OS=Hordeum vulgare subsp. vulgare OX=112509 PE=3 SV=1	High					0.178325	0.346441	0.183169	-0.488209	-0.98585	-1.16464	-0.374704	-0.677055	-0.69796	-0.582019	-1.03428	-1.47403	0.2839	-0.411841	-0.00502451	0.27733	0.148144	0.140875	A0A287PKK6	0	0	0	0	0	0	0	0	0	0	0	0	0	0	0	0	0	0	0	0	0	0	0	0
A0A287PVH4	Uncharacterized protein OS=Hordeum vulgare subsp. vulgare OX=112509 PE=4 SV=1	High					-0.174094	0.21716	0.00302686	0.776873	0.895285	1.0516	0.259821	0.596088	0.197436	1.26039	0.309576	0.824974	-0.708453	-0.769318	-0.656546	-0.156681	-0.300922	0.553898	A0A287PVH4	0	0	0	0	0	0	0	0	0	0	0	0	0	0	0	0	0	0	0	0	0	0	0	0
A0A287XHE0	PPIase cyclophilin-type domain-containing protein OS=Hordeum vulgare subsp. vulgare OX=112509 PE=4 SV=1	High					0.11908	-0.0634055	0.213496	0.987451	0.346814	0.780235	0.386005	0.492163	0.136828	0.483547	0.0991969	0.328817	1.79668	0.808035	-0.202031	0.0694096	0.152439	-1.02267	A0A287XHE0	0	0	0	0	0	0	0	0	0	0	0	0	1	0	0	0	0	0	1	0	0	1	1	0
A0A287PAL8	Uncharacterized protein OS=Hordeum vulgare subsp. vulgare OX=112509 PE=4 SV=1	High					-0.0243651	0.293108	-0.706337	2.0683	1.70719	2.25476	1.77901	1.34828	1.88385	0.755581	-0.98719	0.94074	-0.122387	-0.359263	-0.0928964	0.132843	0.113119	0.557842	A0A287PAL8	0	0	0	1	1	1	1	0	1	0	0	0	0	0	0	0	0	0	5	3	2	0	2	1
A0A287F2M6	ATP synthase subunit gamma OS=Hordeum vulgare subsp. vulgare OX=112509 PE=3 SV=1	High																							A0A287F2M6	0	0	0	0	0	0	0	0	0	0	0	0	0	0	0	0	0	0	0	0	0	0	0	0
F2DKC2	Histone H2A OS=Hordeum vulgare subsp. vulgare OX=112509 PE=2 SV=1	High		chromosome;nucleus	DNA binding;protein binding	Pf00125																			F2DKC2	0	0	0	0	0	0	0	0	0	0	0	0	0	0	0	0	0	0	0	0	0	0	0	0
M0WMV2	CS domain-containing protein OS=Hordeum vulgare subsp. vulgare OX=112509 PE=4 SV=1	High				Pf04969	-0.120381	-0.268434	0.187129	0.210952	-0.025519	0.669832	-0.203265	-0.0573305	0.236416	-0.17663	-0.209253	0.62309	-0.910395	-0.290529	0.289046	-1.59591	-0.877565	0.69314	M0WMV2	0	0	0	0	0	0	0	0	0	0	0	0	0	0	0	-1	0	0	1	0	0	1	1	0
F2D9L1	Predicted protein OS=Hordeum vulgare subsp. vulgare OX=112509 PE=2 SV=1	High	metabolic process;transport		catalytic activity	Pf00106,Pf01073,Pf01370,Pf02254,Pf05368,Pf08659,Pf13460																			F2D9L1	0	0	0	0	0	0	0	0	0	0	0	0	0	0	0	0	0	0	0	0	0	0	0	0
A0A287RJI1	S4 RNA-binding domain-containing protein OS=Hordeum vulgare subsp. vulgare OX=112509 PE=3 SV=1	High					-0.145048	0.169522	0.229599	-0.148921	-1.53418	-1.37444	-0.278935	-0.448106	-1.06528	-0.920884	-0.511638	-0.851624	2.40344	0.848961	0.0238237	0.830806	1.10669	0.250393	A0A287RJI1	0	0	0	0	-1	0	0	0	0	0	0	0	1	0	0	0	0	0	2	1	0	1	1	1
A0A287MX77	Not3 domain-containing protein OS=Hordeum vulgare subsp. vulgare OX=112509 PE=4 SV=1	High																							A0A287MX77	0	0	0	0	0	0	0	0	0	0	0	0	0	0	0	0	0	0	0	0	0	0	0	0
F2DZ36	Predicted protein OS=Hordeum vulgare subsp. vulgare OX=112509 PE=2 SV=1	High				Pf07876	0.586515	0.755457	0.11757	-0.598067	-0.0231245	-0.0276535	-0.159891	-0.182719	0.249117	-0.237604	-0.848863	-0.464209	0.413796	0.819414	-0.612278	-1.07499	-0.917728	-1.28158	F2DZ36	0	0	0	0	0	0	0	0	0	0	0	0	0	0	0	0	0	0	0	0	0	0	0	0
A0A287UR13	Uncharacterized protein OS=Hordeum vulgare subsp. vulgare OX=112509 PE=4 SV=1	High					-0.9308	-0.32992	0.324867	0.25591	0.174996	-0.466935	-0.467294	-0.0926045	-0.563176	-0.328204	-0.36062	-0.821309	0.581688	0.0415266	-0.461024	0.243854	0.438696	-1.23005	A0A287UR13	0	0	0	0	0	0	0	0	0	0	0	0	0	0	0	0	0	0	0	0	0	0	0	0
A0A287S8E6	Uncharacterized protein OS=Hordeum vulgare subsp. vulgare OX=112509 PE=4 SV=1	High					0.136489	-0.112898	-0.520103	-0.393241	1.52427	1.31152	-0.280166	0.113881	-0.652899	-0.678798	0.371082	0.241026	1.33906	-0.357952	1.98366		-1.38646	0.393093	A0A287S8E6	0	0	0	0	1	0	0	0	0	0	0	0	0	0	1	0	0	0	2	1	0	1	0	1
A0A287MEG0	MFAP1 domain-containing protein OS=Hordeum vulgare subsp. vulgare OX=112509 PE=4 SV=1	High																							A0A287MEG0	0	0	0	0	0	0	0	0	0	0	0	0	0	0	0	0	0	0	0	0	0	0	0	0
A0A287TVJ2	MLO-like protein OS=Hordeum vulgare subsp. vulgare OX=112509 GN=MLO PE=3 SV=1	High																							A0A287TVJ2	0	0	0	0	0	0	0	0	0	0	0	0	0	0	0	0	0	0	0	0	0	0	0	0
A0A287SGU9	Uncharacterized protein OS=Hordeum vulgare subsp. vulgare OX=112509 PE=4 SV=1	High					0.544553	-0.311215	-0.269757	1.0195	0.386522	0.764069	0.1654	0.0620051	-0.000392362	0.481879	-0.171248	0.284291	-0.220888	-0.73229	-0.255972	-0.0413394	-0.574861	-0.226587	A0A287SGU9	0	0	0	0	0	0	0	0	0	0	0	0	0	0	0	0	0	0	0	0	0	0	0	0
F2DB74	Predicted protein (Fragment) OS=Hordeum vulgare subsp. vulgare OX=112509 PE=2 SV=1	High	metabolic process		catalytic activity	Pf10664	0.664183	1.00768	1.72078	-0.702368	-0.181542	0.0160517	0.876222	0.651396	0.982406	-0.618718	0.203996	-0.230313	1.22771	0.739377	0.529618	1.10609	1.86693	1.38552	F2DB74	0	0	1	0	0	0	0	0	0	0	0	0	0	0	0	0	1	0	2	1	0	1	0	1
A0A287FRJ4	Acyl carrier protein OS=Hordeum vulgare subsp. vulgare OX=112509 PE=3 SV=1	High					0.141565	0.232296	-0.19595	0.406902	0.663076	0.685559	0.00973794	-0.210498	-0.0642831	0.321708	0.132997	0.305039	-0.0365893	0.311301	0.337127	-0.561797	-0.736536	-0.0751846	A0A287FRJ4	0	0	0	0	0	0	0	0	0	0	0	0	0	0	0	0	0	0	0	0	0	0	0	0
F2DFX0	Predicted protein OS=Hordeum vulgare subsp. vulgare OX=112509 PE=2 SV=1	High					-0.672553	-0.441931	-1.86556	1.26416	0.895208	1.97755	-0.179224	0.571953	0.977055	0.368842	0.647684	1.47833	-0.286326		-1.44233				F2DFX0	0	0	-1	0	0	1	0	0	0	0	0	0	0	0	0	0	0	0	2	2	0	0	0	0
A0A287TDE6	Aldo_ket_red domain-containing protein OS=Hordeum vulgare subsp. vulgare OX=112509 PE=4 SV=1	High																							A0A287TDE6	0	0	0	0	0	0	0	0	0	0	0	0	0	0	0	0	0	0	0	0	0	0	0	0
A0A287S3J3	Uncharacterized protein OS=Hordeum vulgare subsp. vulgare OX=112509 PE=4 SV=1	High					-0.198062	-0.0622355	-0.099642	0.316647	0.61804	-0.0110928	0.401748	-0.378156	-0.282859	0.456474	0.333992	0.800974	1.20291	-0.256445	-0.389381	1.5009	1.1652	1.46506	A0A287S3J3	0	0	0	0	0	0	0	0	0	0	0	0	0	0	0	0	0	0	0	0	0	0	0	0
A0A287K2P8	Uncharacterized protein OS=Hordeum vulgare subsp. vulgare OX=112509 PE=4 SV=1	High					-0.0657253	-0.24732	-1.14479	0.389325	-0.195338	0.630441	0.0953083	0.185119	-0.153654	-0.171466	-0.17374	0.425825	0.592383	-0.914924	-0.117869	-0.175724	-0.026762	0.351584	A0A287K2P8	0	0	0	0	0	0	0	0	0	0	0	0	0	0	0	0	0	0	0	0	0	0	0	0
A0A287KMB8	Reticulon-like protein OS=Hordeum vulgare subsp. vulgare OX=112509 PE=4 SV=2	High					-0.0910471	-0.606123	-1.54874	0.179222	-0.00336647	-1.19328	-0.309846	-0.619398	-0.118659	-0.251607	-0.346069	-0.434961	-0.436704	-0.416342	-0.340567	-0.319835	-1.37051	-0.825299	A0A287KMB8	0	0	-1	0	0	0	0	0	0	0	0	0	0	0	0	0	0	0	1	1	0	0	0	0
S4YZ29	50S ribosomal protein L22, chloroplastic OS=Hordeum vulgare subsp. spontaneum OX=77009 GN=rpl22 PE=3 SV=1	High	metabolic process	ribosome	RNA binding;structural molecule activity	Pf00237	-0.893754	1.48313	1.11139	-1.00892	0.797241	-1.49564	-0.460313	-0.497491	-0.481777	-1.1678	-1.42567	-1.35481	3.0494	1.4026	1.07972	1.17298	2.33111	1.13751	S4YZ29	0	0	0	0	0	0	0	0	0	0	0	0	1	0	0	0	1	0	2	0	0	2	1	1
M0YIV4	Uncharacterized protein OS=Hordeum vulgare subsp. vulgare OX=112509 PE=4 SV=1	High	regulation of biological process;response to stimulus		metal ion binding	Pf00036,Pf10591,Pf13202,Pf13405,Pf13499,Pf13833																			M0YIV4	0	0	0	0	0	0	0	0	0	0	0	0	0	0	0	0	0	0	0	0	0	0	0	0
A0A287Q1Q5	AAI domain-containing protein OS=Hordeum vulgare subsp. vulgare OX=112509 PE=4 SV=1	High					1.13756	1.00103	1.71527	0.791962	0.235485	-0.219797	-0.790619	-1.15267	-0.677442	-1.20272	-0.436996	-0.664784				1.01065	1.82535	-0.328455	A0A287Q1Q5	0	0	1	0	0	0	0	0	0	0	0	0	0	0	0	0	1	0	2	1	0	1	0	1
A0A287JMQ9	Clathrin light chain OS=Hordeum vulgare subsp. vulgare OX=112509 PE=3 SV=1	High					0.854361	0.586763	0.601192	0.941572	0.100959	0.644305	-0.271542	-0.590851	-0.0952235	0.870654	0.0424013	0.96268		-0.0256855	0.0564408				A0A287JMQ9	0	0	0	0	0	0	0	0	0	0	0	0	0	0	0	0	0	0	0	0	0	0	0	0
A0A287N7H2	Uncharacterized protein OS=Hordeum vulgare subsp. vulgare OX=112509 PE=4 SV=1	High					0.994345	2.04225	1.77848	0.947852	-0.493278	-0.251695	0.830927	0.379335	1.24064	-0.025587	0.410099	0.827038	1.54751	1.47312	0.312809	1.16891	1.20687	0.804642	A0A287N7H2	0	1	1	0	0	0	0	0	0	0	0	0	1	0	0	0	0	0	3	2	0	1	1	1
F2EEP9	Predicted protein OS=Hordeum vulgare subsp. vulgare OX=112509 PE=2 SV=1	High																							F2EEP9	0	0	0	0	0	0	0	0	0	0	0	0	0	0	0	0	0	0	0	0	0	0	0	0
F2DXE4	Predicted protein OS=Hordeum vulgare subsp. vulgare OX=112509 PE=2 SV=1	High	cellular homeostasis;metabolic process;regulation of biological process		catalytic activity;protein binding	Pf13409,Pf13417																			F2DXE4	0	0	0	0	0	0	0	0	0	0	0	0	0	0	0	0	0	0	0	0	0	0	0	0
A0A287JGQ1	Uncharacterized protein OS=Hordeum vulgare subsp. vulgare OX=112509 PE=4 SV=1	High					-1.82767	-0.403667	0.659409	-0.0322622	-0.394794	0.552056	0.627314	0.686914	1.02885	0.0955652	-0.47192	1.04372	-0.839773	0.128344	-0.296795	1.59466	1.90098	0.54847	A0A287JGQ1	-1	0	0	0	0	0	0	0	0	0	0	0	0	0	0	1	1	0	3	1	0	2	2	1
F2E652	Predicted protein OS=Hordeum vulgare subsp. vulgare OX=112509 PE=2 SV=1	High			metal ion binding	Pf00642	-0.233644	1.22532		1.63584	1.70425	0.925798	-0.945348	-0.149792	-2.59124	0.477358	1.09558	0.983941			-1.28295	1.78235	-0.550559	0.408233	F2E652	0	0	0	1	1	0	0	0	-1	0	0	0	0	0	0	1	0	0	4	2	1	1	2	1
F2DGG6	Histone H2A OS=Hordeum vulgare subsp. vulgare OX=112509 PE=2 SV=1	High		chromosome;nucleus	DNA binding;protein binding	Pf00125	0.326786	0.29105	0.159978	-0.179774	-0.0838917	-0.96362	-0.223898	0.100216	0.394348	0.146935	0.778979	-0.196025				-0.304607	-0.130143	-2.03263	F2DGG6	0	0	0	0	0	0	0	0	0	0	0	0	0	0	0	0	0	0	0	0	0	0	0	0
F2D0R3	Predicted protein OS=Hordeum vulgare subsp. vulgare OX=112509 PE=2 SV=1	High			RNA binding	Pf00076,Pf13893,Pf14259																			F2D0R3	0	0	0	0	0	0	0	0	0	0	0	0	0	0	0	0	0	0	0	0	0	0	0	0
F2DT04	Ubiquitin carboxyl-terminal hydrolase OS=Hordeum vulgare subsp. vulgare OX=112509 PE=2 SV=1	High	metabolic process		catalytic activity	Pf01088	-0.329534	0.167237	-0.0396842	0.859729	0.585574	0.348773	-0.19408	0.545825	0.0184751	0.712383	0.921464	1.0693	-0.0275251	-0.0404822	-1.44192	-0.139015	-1.974	-0.801546	F2DT04	0	0	0	0	0	0	0	0	0	0	0	0	0	0	0	0	-1	0	1	0	0	1	0	1
A0A287XMN3	Phytocyanin domain-containing protein OS=Hordeum vulgare subsp. vulgare OX=112509 PE=4 SV=1	High																							A0A287XMN3	0	0	0	0	0	0	0	0	0	0	0	0	0	0	0	0	0	0	0	0	0	0	0	0
F2D688	Predicted protein OS=Hordeum vulgare subsp. vulgare OX=112509 PE=2 SV=1	High			catalytic activity	Pf14249																			F2D688	0	0	0	0	0	0	0	0	0	0	0	0	0	0	0	0	0	0	0	0	0	0	0	0
Q05968	Pathogenesis-related protein 1 OS=Hordeum vulgare OX=4513 PE=2 SV=1	High	defense response;response to stimulus	extracellular		Pf00188	2.367	2.26441	0.411177	-0.51357	0.293969	0.10701	-0.0453988	0.126033	0.203462	0.160721	0.339065	0.0675574	0.604268	0.12178	-2.9649	-0.616043	-0.652742		Q05968	1	1	0	0	0	0	0	0	0	0	0	0	0	0	-1	0	0	0	3	2	0	1	1	1
M0XEX8	Uncharacterized protein OS=Hordeum vulgare subsp. vulgare OX=112509 PE=3 SV=1	High		cytosol	catalytic activity;DNA binding;nucleotide binding	Pf00270,Pf00271,Pf04851	1.17355	1.17697	-0.243146	1.10424	0.620848	0.692763	-0.00824922	-0.223228	0.0841667	0.863139	0.72127	0.719207				0.741662	0.206952	0.957005	M0XEX8	0	0	0	0	0	0	0	0	0	0	0	0	0	0	0	0	0	0	0	0	0	0	0	0
F2CYG6	Predicted protein OS=Hordeum vulgare subsp. vulgare OX=112509 PE=2 SV=1	High	metabolic process		catalytic activity	Pf00107																			F2CYG6	0	0	0	0	0	0	0	0	0	0	0	0	0	0	0	0	0	0	0	0	0	0	0	0
A0A287F0Q7	Uncharacterized protein OS=Hordeum vulgare subsp. vulgare OX=112509 PE=3 SV=1	High																							A0A287F0Q7	0	0	0	0	0	0	0	0	0	0	0	0	0	0	0	0	0	0	0	0	0	0	0	0
B2CHJ4	Calcium-dependent protein kinase OS=Hordeum vulgare OX=4513 PE=2 SV=1	High	metabolic process		catalytic activity;metal ion binding;nucleotide binding	Pf00036,Pf00069,Pf07714,Pf13202,Pf13405,Pf13499,Pf13833,Pf14531																			B2CHJ4	0	0	0	0	0	0	0	0	0	0	0	0	0	0	0	0	0	0	0	0	0	0	0	0
A0A287I1F2	Uncharacterized protein OS=Hordeum vulgare subsp. vulgare OX=112509 PE=4 SV=1	High					0.568224	0.642393	-0.610127	-0.590717	0.11891	-0.149041	-0.660011	-0.889668	-0.0996929	0.569796	0.841206	-0.257378	0.174952	0.621624	-0.578238	0.653847	-0.490141	0.279483	A0A287I1F2	0	0	0	0	0	0	0	0	0	0	0	0	0	0	0	0	0	0	0	0	0	0	0	0
A0A287SM95	Lysine--tRNA ligase OS=Hordeum vulgare subsp. vulgare OX=112509 PE=3 SV=1	High					-0.555182	0.273679	-1.04358	-0.847643	0.15337	-0.0926123	0.121709	0.109308	-0.0584121	-0.080465	1.02302	0.449909	-0.875463	-0.793054	-0.59663	-1.55432	-1.23538		A0A287SM95	0	0	0	0	0	0	0	0	0	0	0	0	0	0	0	-1	0	0	1	0	0	1	1	0
A0A287IEH1	NAD(P)-bd_dom domain-containing protein OS=Hordeum vulgare subsp. vulgare OX=112509 PE=4 SV=1	High																							A0A287IEH1	0	0	0	0	0	0	0	0	0	0	0	0	0	0	0	0	0	0	0	0	0	0	0	0
A0A287UTD0	SHSP domain-containing protein OS=Hordeum vulgare subsp. vulgare OX=112509 PE=3 SV=1	High																							A0A287UTD0	0	0	0	0	0	0	0	0	0	0	0	0	0	0	0	0	0	0	0	0	0	0	0	0
A0A287QRK0	eIF-5a domain-containing protein OS=Hordeum vulgare subsp. vulgare OX=112509 PE=4 SV=1	High					-0.392797	-0.434834	-0.330448	1.9101	0.907353	1.7144	-0.428761	-0.243556	-0.50531	0.91842	0.476163	1.37463	-1.71616	0.242028	0.759995	-0.8263	-0.840084	0.151097	A0A287QRK0	0	0	0	1	0	1	0	0	0	0	0	0	-1	0	0	0	0	0	3	2	0	1	2	0
F2E8D9	Predicted protein (Fragment) OS=Hordeum vulgare subsp. vulgare OX=112509 PE=2 SV=1	High			enzyme regulator activity	Pf01412	0.351652	0.408537	0.219279	1.63307	0.663849	0.663329	-0.109389	0.312933	-0.185602	1.1451	0.389567	1.19323	-1.37561			-0.596333		0.99477	F2E8D9	0	0	0	1	0	0	0	0	0	0	0	0	0	0	0	0	0	0	1	1	0	0	1	0
F2DXZ4	Predicted protein OS=Hordeum vulgare subsp. vulgare OX=112509 PE=2 SV=1	High	cell organization and biogenesis		RNA binding	Pf00472	0.836489	0.205322	0.560829	-1.06012	0.640196	-0.239106	0.856443	0.345671	0.675402	0.165155	-0.0668077	-0.305188	1.30312	1.47132	-0.528461	-0.251347	-1.22114	-0.494994	F2DXZ4	0	0	0	0	0	0	0	0	0	0	0	0	0	0	0	0	0	0	0	0	0	0	0	0
M0ZAZ2	Chalcone-flavonone isomerase family protein OS=Hordeum vulgare subsp. vulgare OX=112509 PE=3 SV=1	High	metabolic process		catalytic activity	Pf02431																			M0ZAZ2	0	0	0	0	0	0	0	0	0	0	0	0	0	0	0	0	0	0	0	0	0	0	0	0
A0A287IRN8	Uncharacterized protein OS=Hordeum vulgare subsp. vulgare OX=112509 PE=4 SV=1	High					0.293123	0.274432	0.454418	1.23826	0.877422	1.39177	0.375683	0.550217	0.189985	0.845238	0.834252	1.32347	0.168715	0.254694	0.323617	0.944392	0.93594	1.28653	A0A287IRN8	0	0	0	0	0	0	0	0	0	0	0	0	0	0	0	0	0	0	0	0	0	0	0	0
A0A287HWR2	Uncharacterized protein OS=Hordeum vulgare subsp. vulgare OX=112509 PE=4 SV=1	High					-0.340979	-0.647525	-0.808583	0.4691	0.0900387	0.597221	-0.101892	0.0344624	-0.211504	0.28833	0.301985	0.481492	-1.22344	-0.447436	-0.512982	-0.098746	-0.323356	0.229964	A0A287HWR2	0	0	0	0	0	0	0	0	0	0	0	0	0	0	0	0	0	0	0	0	0	0	0	0
A0A287VV75	Rieske domain-containing protein OS=Hordeum vulgare subsp. vulgare OX=112509 PE=4 SV=1	High																							A0A287VV75	0	0	0	0	0	0	0	0	0	0	0	0	0	0	0	0	0	0	0	0	0	0	0	0
A0A287WKQ1	Uncharacterized protein OS=Hordeum vulgare subsp. vulgare OX=112509 PE=4 SV=1	High																							A0A287WKQ1	0	0	0	0	0	0	0	0	0	0	0	0	0	0	0	0	0	0	0	0	0	0	0	0
A0A287UZD3	Deyhydrin 4 OS=Hordeum vulgare subsp. vulgare OX=112509 PE=3 SV=1	High																							A0A287UZD3	0	0	0	0	0	0	0	0	0	0	0	0	0	0	0	0	0	0	0	0	0	0	0	0
A0A287UT09	AAI domain-containing protein OS=Hordeum vulgare subsp. vulgare OX=112509 PE=4 SV=1	High					1.41909	1.88958	1.99296	-1.20079	0.0112116	-1.70661	1.65862	0.329472	0.675758	0.354844	1.07276	-0.137809	-0.266276	-0.28226	-4.97448	1.0054	-0.410446	-1.08859	A0A287UT09	0	1	1	0	0	-1	1	0	0	0	0	0	0	0	-1	0	0	0	5	3	1	1	1	1
F2DDM9	Predicted protein OS=Hordeum vulgare subsp. vulgare OX=112509 PE=2 SV=1	High	cell communication;metabolic process;response to stimulus	cytoplasm	catalytic activity	Pf01180																			F2DDM9	0	0	0	0	0	0	0	0	0	0	0	0	0	0	0	0	0	0	0	0	0	0	0	0
A0A287GTR5	V-type proton ATPase subunit C OS=Hordeum vulgare subsp. vulgare OX=112509 PE=3 SV=1	High																							A0A287GTR5	0	0	0	0	0	0	0	0	0	0	0	0	0	0	0	0	0	0	0	0	0	0	0	0
F2E6B9	Ferredoxin OS=Hordeum vulgare subsp. vulgare OX=112509 PE=2 SV=1	High	metabolic process;transport		metal ion binding	Pf00111																			F2E6B9	0	0	0	0	0	0	0	0	0	0	0	0	0	0	0	0	0	0	0	0	0	0	0	0
A0A287N2F8	PAP_fibrillin domain-containing protein OS=Hordeum vulgare subsp. vulgare OX=112509 PE=4 SV=1	High																							A0A287N2F8	0	0	0	0	0	0	0	0	0	0	0	0	0	0	0	0	0	0	0	0	0	0	0	0
F2DKL9	Predicted protein OS=Hordeum vulgare subsp. vulgare OX=112509 PE=2 SV=1	High	transport			Pf03357	1.78064	1.45133	0.157594	-0.827734	-1.52266	-2.95282	-1.50307	-0.416007	-2.33414	1.35584	3.24393	1.3101	-1.47447	0.11787	-0.288423	0.169746	-0.494432	-1.19119	F2DKL9	1	0	0	0	-1	-1	-1	0	-1	0	1	0	0	0	0	0	0	0	6	3	3	0	2	2
M0WI75	WHy domain-containing protein OS=Hordeum vulgare subsp. vulgare OX=112509 PE=4 SV=1	High	response to stimulus			Pf03168																			M0WI75	0	0	0	0	0	0	0	0	0	0	0	0	0	0	0	0	0	0	0	0	0	0	0	0
A0A287R194	SUEL-type lectin domain-containing protein OS=Hordeum vulgare subsp. vulgare OX=112509 PE=4 SV=1	High					-0.498291	0.0546407	0.924095	0.0989712	0.348911	-0.250634	0.482367	1.4849	0.72228	0.944655	1.5044	0.734069	0.400277	0.221602	0.699412	-0.0496572	0.276534	0.379441	A0A287R194	0	0	0	0	0	0	0	0	0	0	1	0	0	0	0	0	0	0	1	0	1	0	0	1
F2E7H5	Predicted protein OS=Hordeum vulgare subsp. vulgare OX=112509 PE=2 SV=1	High			protein binding	Pf02845	-0.133322	0.837486	0.11044	0.13893	0.658779	-0.513394	0.231872	0.235344	-0.065547	-0.067991	-0.262561	-0.351731	-0.32524	-0.286527	0.931628	-1.34003	-0.288532	-0.843832	F2E7H5	0	0	0	0	0	0	0	0	0	0	0	0	0	0	0	0	0	0	0	0	0	0	0	0
M0X338	t-SNARE coiled-coil homology domain-containing protein OS=Hordeum vulgare subsp. vulgare OX=112509 PE=4 SV=1	High		membrane			0.209692	-0.317144	-0.268988	0.94429	0.247123	0.0590502	0.391588	0.514419	0.396131	0.224887	-0.148621	0.744965	-0.0321551	-0.204062	0.628784	-0.00670812		0.162915	M0X338	0	0	0	0	0	0	0	0	0	0	0	0	0	0	0	0	0	0	0	0	0	0	0	0
A0A287N8B5	Uncharacterized protein OS=Hordeum vulgare subsp. vulgare OX=112509 PE=4 SV=1	High																							A0A287N8B5	0	0	0	0	0	0	0	0	0	0	0	0	0	0	0	0	0	0	0	0	0	0	0	0
F2DPU4	Predicted protein OS=Hordeum vulgare subsp. vulgare OX=112509 PE=2 SV=1	High			catalytic activity;nucleotide binding	Pf00270,Pf00271																			F2DPU4	0	0	0	0	0	0	0	0	0	0	0	0	0	0	0	0	0	0	0	0	0	0	0	0
A0A287SQY4	Uncharacterized protein OS=Hordeum vulgare subsp. vulgare OX=112509 PE=3 SV=1	High					-1.35889	-0.580046	0.540715	0.7968	-0.772766	-0.222262	0.990947	0.622603	0.139906	-0.287912	-0.73831	0.155197	0.192786	-0.197584	0.49302	-0.707256	0.01659	-0.273914	A0A287SQY4	0	0	0	0	0	0	0	0	0	0	0	0	0	0	0	0	0	0	0	0	0	0	0	0
A0A287G650	Histone H2A OS=Hordeum vulgare subsp. vulgare OX=112509 PE=3 SV=1	High					-0.724417	0.33964	0.780314	-0.43024	-0.92312	0.74586	-0.414742	-0.556976	-0.0825059	-0.744637	-0.359265	0.266066	1.25344	0.16963	-0.37746	0.30796	0.480854		A0A287G650	0	0	0	0	0	0	0	0	0	0	0	0	0	0	0	0	0	0	0	0	0	0	0	0
A0A287S2W4	X8 domain-containing protein OS=Hordeum vulgare subsp. vulgare OX=112509 PE=3 SV=1	High					-1.17114	-2.39961	-1.27774	0.0627211	0.541597	0.456251	0.0779033	-0.139282	-0.965525	-0.0828275	0.37791	0.360739		-0.285458	1.64755				A0A287S2W4	0	-1	0	0	0	0	0	0	0	0	0	0	0	0	1	0	0	0	2	1	0	1	0	1
A0A287W2Y8	Annexin OS=Hordeum vulgare subsp. vulgare OX=112509 PE=3 SV=1	High																							A0A287W2Y8	0	0	0	0	0	0	0	0	0	0	0	0	0	0	0	0	0	0	0	0	0	0	0	0
A0A287SYF6	Uncharacterized protein OS=Hordeum vulgare subsp. vulgare OX=112509 PE=3 SV=1	High																							A0A287SYF6	0	0	0	0	0	0	0	0	0	0	0	0	0	0	0	0	0	0	0	0	0	0	0	0
A0A287UY47	Uncharacterized protein OS=Hordeum vulgare subsp. vulgare OX=112509 PE=3 SV=1	High																							A0A287UY47	0	0	0	0	0	0	0	0	0	0	0	0	0	0	0	0	0	0	0	0	0	0	0	0
A0A287XRU2	Thioredoxin domain-containing protein OS=Hordeum vulgare subsp. vulgare OX=112509 PE=4 SV=1	High					-0.0245702	-0.361646	-0.152812	0.314301	0.191064	0.201438	-0.172616	-0.290461	-0.235681	0.229937	0.0691778	0.395388	-0.38365	-0.325538	-0.701426	-0.0990245	-0.72177	-0.0800122	A0A287XRU2	0	0	0	0	0	0	0	0	0	0	0	0	0	0	0	0	0	0	0	0	0	0	0	0
A0A287P3G4	DBC1 domain-containing protein OS=Hordeum vulgare subsp. vulgare OX=112509 PE=4 SV=1	High					0.104188	-0.436907	0.081431	0.0136418	0.145574	-0.0906497	-0.546164	-0.395093	-0.626493	0.121755	-0.770858	-0.121797	-0.263206	-0.306683	0.588108	0.131533	-0.27213	0.198897	A0A287P3G4	0	0	0	0	0	0	0	0	0	0	0	0	0	0	0	0	0	0	0	0	0	0	0	0
A0A287EJH4	Glucose-6-phosphate isomerase OS=Hordeum vulgare subsp. vulgare OX=112509 PE=3 SV=1	High					-0.137704	1.7164	-0.0388101	-0.0389395	1.04685	-0.817242	0.182944	-0.346393	-0.257481	-1.16004	0.064569	0.220097				0.59727	0.760802	-0.360663	A0A287EJH4	0	1	0	0	0	0	0	0	0	0	0	0	0	0	0	0	0	0	1	1	0	0	0	1
A0A287EKM8	YTH domain-containing protein OS=Hordeum vulgare subsp. vulgare OX=112509 PE=4 SV=1	High					0.561584	0.4922	0.406772	0.0267109	-0.526854	-1.49203	0.870131	0.728209	0.267043	0.876374	0.719008	0.593553	0.0111659	-1.0637	-1.65242	0.497138	-1.16545	0.488447	A0A287EKM8	0	0	0	0	0	0	0	0	0	0	0	0	0	0	-1	0	0	0	1	0	0	1	0	0
A0A287QBA8	60S ribosomal protein L36 OS=Hordeum vulgare subsp. vulgare OX=112509 PE=3 SV=1	High					0.0932756	0.113181	-0.724319	0.612025	0.512346	0.40294	0.00333523	-0.191641	-0.285683	0.258878	-0.0811033	0.248334	0.331831	-0.157427	0.169695	-0.00861624	0.119237	0.456231	A0A287QBA8	0	0	0	0	0	0	0	0	0	0	0	0	0	0	0	0	0	0	0	0	0	0	0	0
A0A287SFI2	Uncharacterized protein OS=Hordeum vulgare subsp. vulgare OX=112509 PE=4 SV=1	High					-0.728537	0.0449034	-1.8081	0.653968	-0.0276315	0.0231431	-0.380646	-0.249903	-0.337519	0.537789	0.619706	0.389169	-2.06655	-0.108835	-0.770063	-0.0710525	-0.72643	-1.55669	A0A287SFI2	0	0	-1	0	0	0	0	0	0	0	0	0	-1	0	0	0	0	-1	3	1	0	2	1	0
A0A287KNT7	Uncharacterized protein OS=Hordeum vulgare subsp. vulgare OX=112509 PE=4 SV=1	High					1.25992	1.59222	0.486537	0.582592	-0.348915	0.181668	0.536204	0.107557	0.489276	0.237013	-0.332083	0.501471	-0.422251	-0.292017	-1.10361	-0.379324	0.211414	1.04587	A0A287KNT7	0	1	0	0	0	0	0	0	0	0	0	0	0	0	0	0	0	0	1	1	0	0	0	1
A0A287P8T1	VOC domain-containing protein OS=Hordeum vulgare subsp. vulgare OX=112509 PE=4 SV=1	High																							A0A287P8T1	0	0	0	0	0	0	0	0	0	0	0	0	0	0	0	0	0	0	0	0	0	0	0	0
A0A287Q8J5	Cysteine synthase OS=Hordeum vulgare subsp. vulgare OX=112509 PE=4 SV=1	High																							A0A287Q8J5	0	0	0	0	0	0	0	0	0	0	0	0	0	0	0	0	0	0	0	0	0	0	0	0
F2DIL1	Ubiquitin carboxyl-terminal hydrolase OS=Hordeum vulgare subsp. vulgare OX=112509 PE=2 SV=1	High	metabolic process		catalytic activity;protein binding	Pf00240,Pf00443																			F2DIL1	0	0	0	0	0	0	0	0	0	0	0	0	0	0	0	0	0	0	0	0	0	0	0	0
F2EA24	Serine/threonine protein phosphatase 2A regulatory subunit OS=Hordeum vulgare subsp. vulgare OX=112509 PE=2 SV=1	High	regulation of biological process;response to stimulus		enzyme regulator activity	Pf01603	-0.237706	-0.162363	0.29605	-0.0301045	0.322395	0.614632	0.12613	-0.147313	0.161378	0.0636965	0.138288	-0.0799364	0.376086	-0.210885	-0.609783	-0.256035		-0.627298	F2EA24	0	0	0	0	0	0	0	0	0	0	0	0	0	0	0	0	0	0	0	0	0	0	0	0
A0A287IH69	N-acetyltransferase domain-containing protein OS=Hordeum vulgare subsp. vulgare OX=112509 PE=4 SV=1	High					-0.249612	2.0453	0.0190683	0.966874	0.493088	0.622447	-0.411262		-1.10335	0.743914	-0.32613	0.194367				-0.563084	-0.738933	-1.71314	A0A287IH69	0	1	0	0	0	0	0	0	0	0	0	0	0	0	0	0	0	-1	2	1	0	1	0	1
F2CXL1	Obg-like ATPase 1 OS=Hordeum vulgare subsp. vulgare OX=112509 PE=2 SV=1	High		cytoplasm	catalytic activity;nucleotide binding	Pf01926,Pf02421,Pf06071																			F2CXL1	0	0	0	0	0	0	0	0	0	0	0	0	0	0	0	0	0	0	0	0	0	0	0	0
F2DFN2	Predicted protein (Fragment) OS=Hordeum vulgare subsp. vulgare OX=112509 PE=2 SV=1	High	metabolic process		catalytic activity	Pf07859																			F2DFN2	0	0	0	0	0	0	0	0	0	0	0	0	0	0	0	0	0	0	0	0	0	0	0	0
A0A287HR73	Uncharacterized protein OS=Hordeum vulgare subsp. vulgare OX=112509 PE=4 SV=1	High					-0.238303	-0.149323	-1.0356	-0.29638	0.635313	-0.125844	0.331429	-0.390449	-0.235684	0.540532	0.457455	0.439093	-0.467187	-1.67094	-0.457976	-0.754532	-0.266225	0.33289	A0A287HR73	0	0	0	0	0	0	0	0	0	0	0	0	0	-1	0	0	0	0	1	0	0	1	0	1
F2EB67	Predicted protein OS=Hordeum vulgare subsp. vulgare OX=112509 PE=2 SV=1	High	cell organization and biogenesis	nucleus		Pf00956																			F2EB67	0	0	0	0	0	0	0	0	0	0	0	0	0	0	0	0	0	0	0	0	0	0	0	0
F2DFU7	Predicted protein OS=Hordeum vulgare subsp. vulgare OX=112509 PE=2 SV=1	High				Pf14368																			F2DFU7	0	0	0	0	0	0	0	0	0	0	0	0	0	0	0	0	0	0	0	0	0	0	0	0
A0A287WBR8	PDZ domain-containing protein OS=Hordeum vulgare subsp. vulgare OX=112509 PE=4 SV=1	High																							A0A287WBR8	0	0	0	0	0	0	0	0	0	0	0	0	0	0	0	0	0	0	0	0	0	0	0	0
M0USA1	PPIase cyclophilin-type domain-containing protein OS=Hordeum vulgare subsp. vulgare OX=112509 PE=4 SV=1	High	metabolic process		catalytic activity	Pf00160	-0.0968059	-1.0564		1.78706	1.35394	1.72792	-0.0928618	-0.675174	-0.68343	2.55473	0.664471	2.78607	-0.691768	-1.14336	-0.254751	-0.733147	-0.329598	-0.548354	M0USA1	0	0	0	1	0	1	0	0	0	1	0	1	0	0	0	0	0	0	4	2	2	0	2	0
A0A287FX10	Coatomer subunit delta OS=Hordeum vulgare subsp. vulgare OX=112509 PE=3 SV=1	High					0.488271	-0.0916568	-0.765148	0.586761	0.423667	0.0790479	-0.00620454	-0.34222	0.0827009	-0.561439	0.0101252	-0.228701	-0.983716	-0.340545	-0.392653	0.388962	0.17222	0.525921	A0A287FX10	0	0	0	0	0	0	0	0	0	0	0	0	0	0	0	0	0	0	0	0	0	0	0	0
F2E350	Predicted protein OS=Hordeum vulgare subsp. vulgare OX=112509 PE=2 SV=1	High			protein binding	Pf13178	0.338849	0.573571	-0.374503	1.90526	-0.0380175	0.510499	-0.0998423	-1.3802	-0.19113	1.6652	1.69369	0.917407	-0.728335	-0.341286	0.638488	0.259199		0.362609	F2E350	0	0	0	1	0	0	0	0	0	1	1	0	0	0	0	0	0	0	3	1	2	0	2	1
M0WC94	Rhodanese domain-containing protein OS=Hordeum vulgare subsp. vulgare OX=112509 PE=4 SV=1	High				Pf00581																			M0WC94	0	0	0	0	0	0	0	0	0	0	0	0	0	0	0	0	0	0	0	0	0	0	0	0
F2CTA6	Predicted protein OS=Hordeum vulgare subsp. vulgare OX=112509 PE=2 SV=1	High	metabolic process		RNA binding	Pf01805																			F2CTA6	0	0	0	0	0	0	0	0	0	0	0	0	0	0	0	0	0	0	0	0	0	0	0	0
A0A287T6Z7	Uncharacterized protein OS=Hordeum vulgare subsp. vulgare OX=112509 PE=4 SV=1	High																							A0A287T6Z7	0	0	0	0	0	0	0	0	0	0	0	0	0	0	0	0	0	0	0	0	0	0	0	0
A0A287U6W1	Uncharacterized protein OS=Hordeum vulgare subsp. vulgare OX=112509 PE=4 SV=1	High																							A0A287U6W1	0	0	0	0	0	0	0	0	0	0	0	0	0	0	0	0	0	0	0	0	0	0	0	0
A0A287F081	Malic enzyme OS=Hordeum vulgare subsp. vulgare OX=112509 PE=3 SV=1	High																							A0A287F081	0	0	0	0	0	0	0	0	0	0	0	0	0	0	0	0	0	0	0	0	0	0	0	0
F2D4M8	Predicted protein OS=Hordeum vulgare subsp. vulgare OX=112509 PE=2 SV=1	High			RNA binding	Pf00076,Pf13893,Pf14259	0.414959	0.44619	-0.538209	-0.00942705	-0.533963	-0.191455	0.218766	-0.256427	0.378668	0.440951	0.0794154	0.48988	-0.0304365	1.51731	0.102402	-1.12336	-1.09424	0.137253	F2D4M8	0	0	0	0	0	0	0	0	0	0	0	0	0	1	0	0	0	0	1	0	0	1	0	1
A0A287V3E2	ENTH domain-containing protein OS=Hordeum vulgare subsp. vulgare OX=112509 PE=4 SV=1	High					-0.650884	-0.743876	-1.9925	0.573937	0.577013	0.21686	-0.455	-0.66799	-0.759247	0.297969	-0.0654586	0.265187	-1.67231	-2.18063	-0.74932	-1.40017	-1.93894	-1.56678	A0A287V3E2	0	0	-1	0	0	0	0	0	0	0	0	0	-1	-1	0	0	-1	-1	5	1	0	4	1	2
A0A287U7U4	Uncharacterized protein OS=Hordeum vulgare subsp. vulgare OX=112509 PE=4 SV=1	High																							A0A287U7U4	0	0	0	0	0	0	0	0	0	0	0	0	0	0	0	0	0	0	0	0	0	0	0	0
F2DYB6	Predicted protein OS=Hordeum vulgare subsp. vulgare OX=112509 PE=2 SV=1	High					0.35006	0.736799	0.515443	-0.0239659	0.259504	0.143847	0.528389	0.586269	0.565405	0.611582	0.510905	0.824791	0.462938	0.776181	0.627404	0.33373	0.0544431	0.733444	F2DYB6	0	0	0	0	0	0	0	0	0	0	0	0	0	0	0	0	0	0	0	0	0	0	0	0
A0A287N275	Pinin_SDK_memA domain-containing protein OS=Hordeum vulgare subsp. vulgare OX=112509 PE=4 SV=1	High					1.10063	1.52991	-0.206467	1.92402	1.12542	1.8528	0.640992	0.521306	0.615477	0.542894	0.253538	0.557563	0.293641	-0.890188	-1.3688	-1.17523	-0.107302	0.275703	A0A287N275	0	1	0	1	0	1	0	0	0	0	0	0	0	0	0	0	0	0	3	3	0	0	1	1
F2CYF5	Predicted protein OS=Hordeum vulgare subsp. vulgare OX=112509 PE=2 SV=1	High	metabolic process		catalytic activity	Pf00082,Pf02225,Pf05922																			F2CYF5	0	0	0	0	0	0	0	0	0	0	0	0	0	0	0	0	0	0	0	0	0	0	0	0
A0A287TLJ0	Uncharacterized protein OS=Hordeum vulgare subsp. vulgare OX=112509 PE=3 SV=1	High																							A0A287TLJ0	0	0	0	0	0	0	0	0	0	0	0	0	0	0	0	0	0	0	0	0	0	0	0	0
H9N7V6	NF-YB3 OS=Hordeum vulgare OX=4513 PE=2 SV=1	High	regulation of biological process	nucleus	DNA binding;protein binding	Pf00808	-0.235887	0.00213358	-0.31585	0.631628	-0.446986	0.293474	0.769009	0.439853	-0.291243	0.817991	0.59472	-0.00120485		1.70608	1.59654	-0.163142	-0.280904	1.33867	H9N7V6	0	0	0	0	0	0	0	0	0	0	0	0	0	1	1	0	0	0	2	0	0	2	0	1
F2DDP4	Predicted protein OS=Hordeum vulgare subsp. vulgare OX=112509 PE=2 SV=1	High																							F2DDP4	0	0	0	0	0	0	0	0	0	0	0	0	0	0	0	0	0	0	0	0	0	0	0	0
A0A287IM48	Aldedh domain-containing protein OS=Hordeum vulgare subsp. vulgare OX=112509 PE=3 SV=1	High																							A0A287IM48	0	0	0	0	0	0	0	0	0	0	0	0	0	0	0	0	0	0	0	0	0	0	0	0
A0A287G451	Uncharacterized protein OS=Hordeum vulgare subsp. vulgare OX=112509 PE=3 SV=1	High					-0.0592765	-0.073759	0.110258	0.628719	0.0734402	0.356193	-0.21795	0.191533	0.0834078	-0.239385	-0.318441	0.124345	-0.972271	-0.266958	-0.988631	-0.520987	-0.820656	-0.821972	A0A287G451	0	0	0	0	0	0	0	0	0	0	0	0	0	0	0	0	0	0	0	0	0	0	0	0
A0A287U8I2	Eukaryotic translation initiation factor 2A OS=Hordeum vulgare subsp. vulgare OX=112509 PE=3 SV=1	High																							A0A287U8I2	0	0	0	0	0	0	0	0	0	0	0	0	0	0	0	0	0	0	0	0	0	0	0	0
A0A287K7R3	PKS_ER domain-containing protein OS=Hordeum vulgare subsp. vulgare OX=112509 PE=4 SV=1	High								0.524324	0.898752	-0.157439	0.0337569	-0.447744	-0.589864	-0.732041	0.741895	-0.193196							A0A287K7R3	0	0	0	0	0	0	0	0	0	0	0	0	0	0	0	0	0	0	0	0	0	0	0	0
F2DTX7	Predicted protein (Fragment) OS=Hordeum vulgare subsp. vulgare OX=112509 PE=2 SV=1	High	metabolic process			Pf00348																			F2DTX7	0	0	0	0	0	0	0	0	0	0	0	0	0	0	0	0	0	0	0	0	0	0	0	0
A0A287R671	Uncharacterized protein OS=Hordeum vulgare subsp. vulgare OX=112509 PE=4 SV=1	High					-0.262329	-0.223261	-0.379086				-0.556341	0.806657	0.424383	0.917477	-0.270307	1.21751	-1.14537	-0.194288	-0.691011	1.21586	0.117234	1.75421	A0A287R671	0	0	0	0	0	0	0	0	0	0	0	0	0	0	0	0	0	1	1	0	0	1	0	0
F2CR42	Predicted protein OS=Hordeum vulgare subsp. vulgare OX=112509 PE=2 SV=1	High		membrane			0.244131	-0.441843	-1.03131	0.748987	-0.178682	-0.567854	-0.571487	-0.495708	-0.167183	-0.223253	-0.317264	0.0377764	-0.55456	-0.795358	-0.884854	-0.0787448	-0.652227	-0.540796	F2CR42	0	0	0	0	0	0	0	0	0	0	0	0	0	0	0	0	0	0	0	0	0	0	0	0
A0A287KIG6	Uncharacterized protein OS=Hordeum vulgare subsp. vulgare OX=112509 PE=4 SV=1	High																							A0A287KIG6	0	0	0	0	0	0	0	0	0	0	0	0	0	0	0	0	0	0	0	0	0	0	0	0
M0W4W4	AB hydrolase-1 domain-containing protein OS=Hordeum vulgare subsp. vulgare OX=112509 PE=4 SV=1	High			catalytic activity	Pf00561,Pf12146,Pf12695,Pf12697																			M0W4W4	0	0	0	0	0	0	0	0	0	0	0	0	0	0	0	0	0	0	0	0	0	0	0	0
A0A287QL45	RRM domain-containing protein OS=Hordeum vulgare subsp. vulgare OX=112509 PE=4 SV=1	High					1.17197	1.0584	0.764286	0.679075	-0.0434163	0.474822	0.423303	0.717704	0.186969	-0.033205	0.0893315	0.230825	-0.949582	-0.844729	-1.18698	-0.362498	-0.233802	0.684837	A0A287QL45	0	0	0	0	0	0	0	0	0	0	0	0	0	0	0	0	0	0	0	0	0	0	0	0
A0A287WRS2	Uncharacterized protein OS=Hordeum vulgare subsp. vulgare OX=112509 PE=4 SV=1	High																							A0A287WRS2	0	0	0	0	0	0	0	0	0	0	0	0	0	0	0	0	0	0	0	0	0	0	0	0
A0A287WY19	Reticulon-like protein OS=Hordeum vulgare subsp. vulgare OX=112509 PE=4 SV=1	High					0.19513	0.440435	0.492798	1.40292	0.196754	0.850482	0.564901	-0.152707	0.527997	1.61764	0.897247	1.6415	1.18368	-0.588543	0.127436	0.830328	0.747635	0.925085	A0A287WY19	0	0	0	0	0	0	0	0	0	1	0	1	0	0	0	0	0	0	2	0	2	0	1	0
A0A287QEG7	Chlorophyll a-b binding protein, chloroplastic OS=Hordeum vulgare subsp. vulgare OX=112509 PE=3 SV=1	High					-0.199305	0.66156	2.01151	-1.68208	0.554334	-1.56318	1.12997	1.07547	0.883449	-0.561066	0.121477	-0.65995	2.89459	0.466086	0.685859	0.528509	0.886168	-1.12387	A0A287QEG7	0	0	1	-1	0	-1	0	0	0	0	0	0	1	0	0	0	0	0	4	3	0	1	2	0
A0A287KUR4	Ligase_CoA domain-containing protein OS=Hordeum vulgare subsp. vulgare OX=112509 PE=4 SV=1	High																							A0A287KUR4	0	0	0	0	0	0	0	0	0	0	0	0	0	0	0	0	0	0	0	0	0	0	0	0
A0A287X6N5	Peptidylprolyl isomerase OS=Hordeum vulgare subsp. vulgare OX=112509 PE=4 SV=1	High					-0.504618	-1.60481	-0.0334347	0.578875	-0.311998	0.598334	-0.999212	0.439506	-1.93073	0.406424	0.501287	0.737733		-1.48198	-0.583885	-0.81197	-1.15046	-2.60842	A0A287X6N5	0	-1	0	0	0	0	0	0	-1	0	0	0	0	0	0	0	0	-1	3	1	1	1	0	1
A0A287GU29	Uncharacterized protein OS=Hordeum vulgare subsp. vulgare OX=112509 PE=4 SV=1	High																							A0A287GU29	0	0	0	0	0	0	0	0	0	0	0	0	0	0	0	0	0	0	0	0	0	0	0	0
A0A287DUE7	Uncharacterized protein OS=Hordeum vulgare subsp. vulgare OX=112509 PE=4 SV=1	High					-1.42727	-0.419289	1.15436	-0.71913	-0.672832	-0.858064	0.81179	0.96302	0.647982	-1.74272	-0.736298	-0.695435	1.69956	0.855869	0.404954	1.38453	1.48369	0.00452035	A0A287DUE7	0	0	0	0	0	0	0	0	0	-1	0	0	1	0	0	0	0	0	2	0	1	1	2	0
Q949H0	40S ribosomal protein S7 OS=Hordeum vulgare OX=4513 GN=RPS7 PE=2 SV=1	High	metabolic process	ribosome	structural molecule activity	Pf01251	-1.21754	0.968023	-0.234397	0.747431	-1.1051	-0.852115	-0.930082	-0.939537	-0.899989	-0.464087	-0.0388494	-0.361132	2.17981	0.570159	1.82511	-1.13444	0.167244		Q949H0	0	0	0	0	0	0	0	0	0	0	0	0	1	0	1	0	0	0	2	0	0	2	1	0
A0A287HC25	Ubiquitin carboxyl-terminal hydrolase OS=Hordeum vulgare subsp. vulgare OX=112509 PE=3 SV=1	High					-0.584999	-0.583919	-1.64097	-0.397066	0.32671	-0.619691	-0.343586	-0.639219	-0.505244	-0.350786	0.00151093	0.447275	-0.424174	-0.587165	0.0520092	-0.476218	-0.792516	-0.659434	A0A287HC25	0	0	-1	0	0	0	0	0	0	0	0	0	0	0	0	0	0	0	1	1	0	0	0	0
F2DBR2	26S proteasome non-ATPase regulatory subunit 1 homolog OS=Hordeum vulgare subsp. vulgare OX=112509 PE=2 SV=1	High	regulation of biological process	proteasome	enzyme regulator activity	Pf01851,Pf07423,Pf13646																			F2DBR2	0	0	0	0	0	0	0	0	0	0	0	0	0	0	0	0	0	0	0	0	0	0	0	0
A0A287ICC8	Transket_pyr domain-containing protein OS=Hordeum vulgare subsp. vulgare OX=112509 PE=4 SV=1	High																							A0A287ICC8	0	0	0	0	0	0	0	0	0	0	0	0	0	0	0	0	0	0	0	0	0	0	0	0
F2CW71	Predicted protein OS=Hordeum vulgare subsp. vulgare OX=112509 PE=2 SV=1	High					0.776724	0.620464	-0.885819	-0.754797	-0.689084	-1.05514	-0.0463747	0.139165	-0.118267	0.0356213	0.0110002	-0.664771	-0.460566	0.506874	-0.368478	-0.345544	-0.850952	-0.156255	F2CW71	0	0	0	0	0	0	0	0	0	0	0	0	0	0	0	0	0	0	0	0	0	0	0	0
F2CZB1	Predicted protein OS=Hordeum vulgare subsp. vulgare OX=112509 PE=2 SV=1	High	cellular homeostasis;metabolic process;regulation of biological process	cytosol	catalytic activity	Pf00085	-0.0968879	0.348429	0.116249	-0.0385515	-0.000534753	-0.695218	-0.417363	-0.280722	-0.616151	0.0800689	0.155933	-0.27042	-0.0749994	0.359462	0.506358		-0.230088	-0.0546633	F2CZB1	0	0	0	0	0	0	0	0	0	0	0	0	0	0	0	0	0	0	0	0	0	0	0	0
A0A287RN20	PKS_ER domain-containing protein OS=Hordeum vulgare subsp. vulgare OX=112509 PE=4 SV=1	High																							A0A287RN20	0	0	0	0	0	0	0	0	0	0	0	0	0	0	0	0	0	0	0	0	0	0	0	0
A0A287V378	4Fe-4S ferredoxin-type domain-containing protein OS=Hordeum vulgare subsp. vulgare OX=112509 PE=4 SV=1	High																							A0A287V378	0	0	0	0	0	0	0	0	0	0	0	0	0	0	0	0	0	0	0	0	0	0	0	0
A0A287NJV3	Uncharacterized protein OS=Hordeum vulgare subsp. vulgare OX=112509 PE=4 SV=1	High																							A0A287NJV3	0	0	0	0	0	0	0	0	0	0	0	0	0	0	0	0	0	0	0	0	0	0	0	0
A0A287U138	Uncharacterized protein OS=Hordeum vulgare subsp. vulgare OX=112509 PE=3 SV=1	High																							A0A287U138	0	0	0	0	0	0	0	0	0	0	0	0	0	0	0	0	0	0	0	0	0	0	0	0
A0A287L8Z5	Uncharacterized protein OS=Hordeum vulgare subsp. vulgare OX=112509 PE=4 SV=1	High																							A0A287L8Z5	0	0	0	0	0	0	0	0	0	0	0	0	0	0	0	0	0	0	0	0	0	0	0	0
A0A287EQZ4	Uncharacterized protein OS=Hordeum vulgare subsp. vulgare OX=112509 PE=3 SV=1	High					-0.114806	-0.100609	-0.148942	-0.471436	0.409172	-0.352404	-0.0149975	0.0568282	-0.0584749	0.133027	0.2042	-0.247335	-0.151703	-0.149428	-0.383942	-0.572557	-0.337241	-0.428402	A0A287EQZ4	0	0	0	0	0	0	0	0	0	0	0	0	0	0	0	0	0	0	0	0	0	0	0	0
A0A287JJB6	Uncharacterized protein OS=Hordeum vulgare subsp. vulgare OX=112509 PE=4 SV=1	High																							A0A287JJB6	0	0	0	0	0	0	0	0	0	0	0	0	0	0	0	0	0	0	0	0	0	0	0	0
M0XW49	S4 RNA-binding domain-containing protein OS=Hordeum vulgare subsp. vulgare OX=112509 PE=3 SV=1	High	metabolic process	ribosome	RNA binding;structural molecule activity	Pf00163,Pf01479				1.13283	0.53479	0.0358671	-0.108102	0.516728	0.339983	-0.505167	0.542266	0.739264	2.10728	0.832919	-0.427151				M0XW49	0	0	0	0	0	0	0	0	0	0	0	0	1	0	0	0	0	0	1	0	0	1	1	0
A0A287M7M1	Sep15_SelM domain-containing protein OS=Hordeum vulgare subsp. vulgare OX=112509 PE=4 SV=1	High																							A0A287M7M1	0	0	0	0	0	0	0	0	0	0	0	0	0	0	0	0	0	0	0	0	0	0	0	0
A0A287KFD1	Uncharacterized protein OS=Hordeum vulgare subsp. vulgare OX=112509 PE=4 SV=1	High					0.349561	0.16257	-0.413128	0.774408	0.383118	-0.150604	0.032297	-0.0919108	-0.397605	0.888012	0.582168	0.313162	-0.0788893	0.117629	0.0749147	1.05456	-0.0618162	0.227619	A0A287KFD1	0	0	0	0	0	0	0	0	0	0	0	0	0	0	0	0	0	0	0	0	0	0	0	0
A0A287JYH6	Cyclic nucleotide-binding domain-containing protein OS=Hordeum vulgare subsp. vulgare OX=112509 PE=4 SV=1	High					-0.194528	0.325312	-0.0407002	-0.417278	0.15665	-0.750392	-0.00580892	-0.0534594	0.0581285	0.184157	0.219574	-0.470587	-0.18689	0.0735928	0.137933	-0.927322	-0.115302	-0.00675752	A0A287JYH6	0	0	0	0	0	0	0	0	0	0	0	0	0	0	0	0	0	0	0	0	0	0	0	0
M0X743	Cytochrome b-c1 complex subunit 7 OS=Hordeum vulgare subsp. vulgare OX=112509 PE=3 SV=1	High	metabolic process;transport	membrane;mitochondrion		Pf02271																			M0X743	0	0	0	0	0	0	0	0	0	0	0	0	0	0	0	0	0	0	0	0	0	0	0	0
F2CUI6	Predicted protein OS=Hordeum vulgare subsp. vulgare OX=112509 PE=2 SV=1	High																							F2CUI6	0	0	0	0	0	0	0	0	0	0	0	0	0	0	0	0	0	0	0	0	0	0	0	0
A0A287KSU3	Peroxiredoxin OS=Hordeum vulgare subsp. vulgare OX=112509 PE=3 SV=1	High					-0.147049	0.541538	-0.154989	1.51482	0.704586	1.16725	-0.142176	-0.178015	-0.0584726	0.312682	-0.329255	0.0743013	0.253732	-0.696442	-0.75682	0.277316	0.341957	1.08808	A0A287KSU3	0	0	0	1	0	0	0	0	0	0	0	0	0	0	0	0	0	0	1	1	0	0	1	0
A0A287H7K2	Uncharacterized protein OS=Hordeum vulgare subsp. vulgare OX=112509 PE=4 SV=1	High																							A0A287H7K2	0	0	0	0	0	0	0	0	0	0	0	0	0	0	0	0	0	0	0	0	0	0	0	0
F2DM06	Predicted protein OS=Hordeum vulgare subsp. vulgare OX=112509 PE=2 SV=1	High				Pf04614	0.226348	0.176078	0.0371253	-0.575507	0.0846707	-0.468797	0.08464	0.0169426	0.246045	0.37095	0.376636	0.260639	-0.135436	-0.231455	-0.242703	-0.492317	-0.439453	0.906716	F2DM06	0	0	0	0	0	0	0	0	0	0	0	0	0	0	0	0	0	0	0	0	0	0	0	0
F2CQW1	Predicted protein OS=Hordeum vulgare subsp. vulgare OX=112509 PE=2 SV=1	High			protein binding	Pf00043,Pf02798,Pf13409,Pf13410,Pf13417,Pf14497																			F2CQW1	0	0	0	0	0	0	0	0	0	0	0	0	0	0	0	0	0	0	0	0	0	0	0	0
F2CXT5	Predicted protein OS=Hordeum vulgare subsp. vulgare OX=112509 PE=2 SV=1	High					-0.233367	0.743039	0.150447	1.13008	0.687447	0.940576	-0.0936449	-0.573777	-0.911416	0.410607	0.1109	0.5674	-1.51115	-0.726994	-0.543471				F2CXT5	0	0	0	0	0	0	0	0	0	0	0	0	-1	0	0	0	0	0	1	0	0	1	1	0
F2DWF0	Predicted protein OS=Hordeum vulgare subsp. vulgare OX=112509 PE=2 SV=1	High					0.0444761	0.323494	0.252551	0.846277	0.591805	0.433369	0.505512	0.454369	-0.0135222	0.279518	0.165835	0.780721	1.20501	-0.241961	0.941711	0.548072	0.420726	2.20354	F2DWF0	0	0	0	0	0	0	0	0	0	0	0	0	0	0	0	0	0	1	1	0	0	1	0	0
F2DC91	Predicted protein OS=Hordeum vulgare subsp. vulgare OX=112509 PE=2 SV=1	High	metabolic process		catalytic activity	Pf01126	-1.49381	-0.00310645	-0.0723381	0.862046	-0.592572	0.576432	-0.538656	-0.995152	-0.342574	0.36446	-0.161405	-0.269353	-1.15319	-0.285239	-0.786001	-0.737563	-0.264121	-0.288106	F2DC91	0	0	0	0	0	0	0	0	0	0	0	0	0	0	0	0	0	0	0	0	0	0	0	0
A0A287TZQ9	Aminopeptidase OS=Hordeum vulgare subsp. vulgare OX=112509 PE=4 SV=1	High																							A0A287TZQ9	0	0	0	0	0	0	0	0	0	0	0	0	0	0	0	0	0	0	0	0	0	0	0	0
A0A287QRJ0	SWIB domain-containing protein OS=Hordeum vulgare subsp. vulgare OX=112509 PE=4 SV=1	High					1.11146	0.819466	-0.461124	-0.893945	0.182111	-0.166279	-0.0721054	0.301512	0.316201	0.116513	0.576591	-0.0814103	-0.675321	-0.566742	-0.721304	0.786797	-0.912863	-0.837217	A0A287QRJ0	0	0	0	0	0	0	0	0	0	0	0	0	0	0	0	0	0	0	0	0	0	0	0	0
M0XWD1	RRM domain-containing protein OS=Hordeum vulgare subsp. vulgare OX=112509 PE=4 SV=1	High			RNA binding	Pf00076,Pf12220,Pf13893,Pf14259																			M0XWD1	0	0	0	0	0	0	0	0	0	0	0	0	0	0	0	0	0	0	0	0	0	0	0	0
A0A287WQ00	Uncharacterized protein OS=Hordeum vulgare subsp. vulgare OX=112509 PE=4 SV=1	High																							A0A287WQ00	0	0	0	0	0	0	0	0	0	0	0	0	0	0	0	0	0	0	0	0	0	0	0	0
A0A287ISE4	Uncharacterized protein OS=Hordeum vulgare subsp. vulgare OX=112509 PE=3 SV=1	High					0.242371	0.0334803	-0.36775	0.16664	0.215694	-0.355765	-0.205788	-0.386243	-0.355329	0.289706	0.0521565	0.19005	-0.565157	-0.529855	0.124487	-0.36641	-0.686411	0.0915743	A0A287ISE4	0	0	0	0	0	0	0	0	0	0	0	0	0	0	0	0	0	0	0	0	0	0	0	0
A0A287F348	Uncharacterized protein OS=Hordeum vulgare subsp. vulgare OX=112509 PE=4 SV=1	High																							A0A287F348	0	0	0	0	0	0	0	0	0	0	0	0	0	0	0	0	0	0	0	0	0	0	0	0
A0A287TFH2	Uncharacterized protein OS=Hordeum vulgare subsp. vulgare OX=112509 PE=4 SV=1	High																							A0A287TFH2	0	0	0	0	0	0	0	0	0	0	0	0	0	0	0	0	0	0	0	0	0	0	0	0
A0A287RAA9	Uncharacterized protein OS=Hordeum vulgare subsp. vulgare OX=112509 PE=3 SV=1	High																							A0A287RAA9	0	0	0	0	0	0	0	0	0	0	0	0	0	0	0	0	0	0	0	0	0	0	0	0
A0A287KZH5	USP domain-containing protein OS=Hordeum vulgare subsp. vulgare OX=112509 PE=3 SV=1	High																							A0A287KZH5	0	0	0	0	0	0	0	0	0	0	0	0	0	0	0	0	0	0	0	0	0	0	0	0
A0A287UM54	Uncharacterized protein OS=Hordeum vulgare subsp. vulgare OX=112509 PE=4 SV=1	High					-0.479715	-0.0754249	-0.905989	1.68851	0.813794	1.81375	0.207791	-0.0153296	0.205659	0.312687	-0.491373	1.06859	-0.482935	-2.32856	-0.740774	-0.267408	-0.151195	-1.2741	A0A287UM54	0	0	0	1	0	1	0	0	0	0	0	0	0	-1	0	0	0	0	3	2	0	1	1	1
A0A287EKJ9	7,8-dihydroneopterin aldolase OS=Hordeum vulgare subsp. vulgare OX=112509 PE=3 SV=1	High																							A0A287EKJ9	0	0	0	0	0	0	0	0	0	0	0	0	0	0	0	0	0	0	0	0	0	0	0	0
F2DS83	Predicted protein OS=Hordeum vulgare subsp. vulgare OX=112509 PE=2 SV=1	High				Pf08555	-0.43417	0.823017	-0.363229	-0.0469425	-0.166339	-0.189752	0.0477737	-0.899601	-0.804608	0.153027	0.304507	0.0539108	0.435333	-0.247746	0.436509	-0.486186	1.51558	1.59772	F2DS83	0	0	0	0	0	0	0	0	0	0	0	0	0	0	0	0	1	1	2	0	0	2	0	1
F2DSK3	Predicted protein OS=Hordeum vulgare subsp. vulgare OX=112509 PE=2 SV=1	High	metabolic process		catalytic activity	Pf00332																			F2DSK3	0	0	0	0	0	0	0	0	0	0	0	0	0	0	0	0	0	0	0	0	0	0	0	0
A0A287KZG1	Vacuolar cation/proton exchanger OS=Hordeum vulgare subsp. vulgare OX=112509 PE=3 SV=1	High					0.00084936	0.0190556	0.127252	1.73659	0.686912		0.211877	0.639449	0.669749	1.31426	0.877447	0.742738	0.11586	0.198194	-0.610324	-0.112496	-0.390441	-0.10039	A0A287KZG1	0	0	0	1	0	0	0	0	0	0	0	0	0	0	0	0	0	0	1	1	0	0	1	0
C3W8M2	Starch branching enzyme OS=Hordeum vulgare subsp. vulgare OX=112509 GN=SBE2a PE=2 SV=1	High	metabolic process		catalytic activity	Pf00128,Pf02806,Pf02922,Pf14701																			C3W8M2	0	0	0	0	0	0	0	0	0	0	0	0	0	0	0	0	0	0	0	0	0	0	0	0
A0A287SXK5	Prohibitin OS=Hordeum vulgare subsp. vulgare OX=112509 PE=3 SV=1	High																							A0A287SXK5	0	0	0	0	0	0	0	0	0	0	0	0	0	0	0	0	0	0	0	0	0	0	0	0
M0V3S6	Uncharacterized protein OS=Hordeum vulgare subsp. vulgare OX=112509 PE=4 SV=1	High	regulation of biological process		enzyme regulator activity	Pf04979	0.382287	0.471159	0.642099	-0.546014	0.00379981	-0.58841	0.162825	0.170113	-0.0744379	0.235535	0.58909	0.260169	-0.568848	0.368786	-0.0294173	-0.0571306	-0.140376	0.329013	M0V3S6	0	0	0	0	0	0	0	0	0	0	0	0	0	0	0	0	0	0	0	0	0	0	0	0
F2D424	Predicted protein OS=Hordeum vulgare subsp. vulgare OX=112509 PE=2 SV=1	High			RNA binding	Pf00076,Pf14259																			F2D424	0	0	0	0	0	0	0	0	0	0	0	0	0	0	0	0	0	0	0	0	0	0	0	0
A0A287LFH3	V-SNARE domain-containing protein OS=Hordeum vulgare subsp. vulgare OX=112509 PE=4 SV=1	High					0.184981	0.0436909	0.0296536	-0.774834	0.0795649	-0.169165	-0.335276	-0.193857	-0.185536	0.0163733	0.021328	0.243363	-0.616775	-0.428444	-0.322361	-0.898363	-0.16539	-0.144057	A0A287LFH3	0	0	0	0	0	0	0	0	0	0	0	0	0	0	0	0	0	0	0	0	0	0	0	0
F2CQU0	Predicted protein OS=Hordeum vulgare subsp. vulgare OX=112509 PE=2 SV=1	High		membrane	protein binding																				F2CQU0	0	0	0	0	0	0	0	0	0	0	0	0	0	0	0	0	0	0	0	0	0	0	0	0
A0A287U642	Uncharacterized protein OS=Hordeum vulgare subsp. vulgare OX=112509 PE=4 SV=1	High																							A0A287U642	0	0	0	0	0	0	0	0	0	0	0	0	0	0	0	0	0	0	0	0	0	0	0	0
F2DR72	Predicted protein OS=Hordeum vulgare subsp. vulgare OX=112509 PE=2 SV=1	High					0.163219	0.833796	0.461679	0.893426	0.949247	1.13371	0.657637	-0.0693663	0.669845	0.589593	0.655835	0.524391	1.0893	-0.109531	0.472987	-0.629312	0.0492562	1.24161	F2DR72	0	0	0	0	0	0	0	0	0	0	0	0	0	0	0	0	0	0	0	0	0	0	0	0
M0WPZ4	SAGA-associated factor 11 OS=Hordeum vulgare subsp. vulgare OX=112509 PE=3 SV=1	High		nucleus		Pf08209	0.0459438	-0.522308	-0.4442	0.304983	0.552787	-0.520028	-1.97878	-1.0737	-1.51448	-0.359105	-0.230253	-0.419571	0.805634	0.822259	1.68548	-0.284126		-0.580394	M0WPZ4	0	0	0	0	0	0	-1	0	-1	0	0	0	0	0	1	0	0	0	3	0	2	1	1	0
F2E3I1	Predicted protein OS=Hordeum vulgare subsp. vulgare OX=112509 PE=2 SV=1	High				Pf05608,Pf05903	0.112961	0.451425	0.589224				0.107587	-0.410749	1.19772	0.0619474	0.518889	1.22505	-0.115097	0.10064	0.10253				F2E3I1	0	0	0	0	0	0	0	0	0	0	0	0	0	0	0	0	0	0	0	0	0	0	0	0
A0A287P5J8	CBM20 domain-containing protein OS=Hordeum vulgare subsp. vulgare OX=112509 PE=4 SV=1	High					-0.301187	-0.026926	-0.233776	0.000241575	0.490615	0.407233	-0.00445564	-0.095679	0.290819	0.0587414	0.133915	0.0881317	0.0653365	-0.33337	-0.246063	-0.294153	-1.20521	-0.612623	A0A287P5J8	0	0	0	0	0	0	0	0	0	0	0	0	0	0	0	0	0	0	0	0	0	0	0	0
A0A287U3G9	Uncharacterized protein OS=Hordeum vulgare subsp. vulgare OX=112509 PE=4 SV=1	High																							A0A287U3G9	0	0	0	0	0	0	0	0	0	0	0	0	0	0	0	0	0	0	0	0	0	0	0	0
A0A287S9I3	Uncharacterized protein OS=Hordeum vulgare subsp. vulgare OX=112509 PE=3 SV=1	High																							A0A287S9I3	0	0	0	0	0	0	0	0	0	0	0	0	0	0	0	0	0	0	0	0	0	0	0	0
A0A287LFM8	Protein kinase domain-containing protein OS=Hordeum vulgare subsp. vulgare OX=112509 PE=4 SV=1	High								1.66979	0.334756	0.0738318	1.50339	0.707366	1.06623	-0.330952	0.751363	0.502767	0.625649			-1.03303	-1.1656	-0.119149	A0A287LFM8	0	0	0	1	0	0	1	0	0	0	0	0	0	0	0	0	0	0	2	1	1	0	2	0
A0A287EZS0	FACT complex subunit SSRP1 OS=Hordeum vulgare subsp. vulgare OX=112509 PE=3 SV=1	High																							A0A287EZS0	0	0	0	0	0	0	0	0	0	0	0	0	0	0	0	0	0	0	0	0	0	0	0	0
A0A287VA57	FKS1_dom1 domain-containing protein OS=Hordeum vulgare subsp. vulgare OX=112509 PE=4 SV=1	High					0.00748272	0.0187345	-0.149928	0.511212	0.86312	0.224465	0.520354	0.252561	0.455168	0.882673	0.667133	0.507307	0.794469	0.305294	0.825753	0.0782658	0.352474	0.57771	A0A287VA57	0	0	0	0	0	0	0	0	0	0	0	0	0	0	0	0	0	0	0	0	0	0	0	0
A0A287I7F7	Uncharacterized protein OS=Hordeum vulgare subsp. vulgare OX=112509 PE=4 SV=1	High					0.267552	-0.141994	-0.343963	1.45919	0.750178	0.689352	0.0746344	0.275266	0.0252389	0.715572	-0.0732378	0.818151	0.57265	0.184749	0.30997	-0.297763	-0.0952593	0.133599	A0A287I7F7	0	0	0	0	0	0	0	0	0	0	0	0	0	0	0	0	0	0	0	0	0	0	0	0
M0UK15	Carbonic anhydrase OS=Hordeum vulgare subsp. vulgare OX=112509 PE=3 SV=1	High			catalytic activity;metal ion binding	Pf00484	-0.170678	0.482783	0.697718	0.0821382	-0.732027	0.0398343	2.27616	1.70882	0.987254	-0.506234	0.0741894	-0.653796	0.506626	-0.662565	-1.44564	1.8643	1.06851	-0.946237	M0UK15	0	0	0	0	0	0	0	0	0	0	0	0	0	0	0	0	0	0	0	0	0	0	0	0
F2DSR1	Predicted protein OS=Hordeum vulgare subsp. vulgare OX=112509 PE=2 SV=1	High		membrane																					F2DSR1	0	0	0	0	0	0	0	0	0	0	0	0	0	0	0	0	0	0	0	0	0	0	0	0
F2DBI6	Predicted protein OS=Hordeum vulgare subsp. vulgare OX=112509 PE=2 SV=1	High	regulation of biological process			Pf05557,Pf08317,Pf12325																			F2DBI6	0	0	0	0	0	0	0	0	0	0	0	0	0	0	0	0	0	0	0	0	0	0	0	0
A0A287Q8R5	30S ribosomal protein S15 OS=Hordeum vulgare subsp. vulgare OX=112509 PE=3 SV=1	High					-0.122842	0.227923	1.01927	0.0751662	-0.75259	0.13491	-0.0565085	-0.102041	0.396201	-0.24514	-0.661724	-0.265569	0.267599	0.294742	0.0319167	0.391824	0.0486972	-0.317063	A0A287Q8R5	0	0	0	0	0	0	0	0	0	0	0	0	0	0	0	0	0	0	0	0	0	0	0	0
A0A287SZD3	AvrRpt-cleavage domain-containing protein OS=Hordeum vulgare subsp. vulgare OX=112509 PE=4 SV=1	High					0.258792	-1.08374	-1.01699	0.0637574	0.0552973	-0.199859	-0.256155	-0.647769	-0.552403	0.0067426	0.0562888	0.623133	2.3982	1.13388	2.25208	0.00510727	0.815672	1.28351	A0A287SZD3	0	0	0	0	0	0	0	0	0	0	0	0	1	0	1	0	0	0	2	0	0	2	1	0
A0A287NZS4	Uroporphyrinogen decarboxylase OS=Hordeum vulgare subsp. vulgare OX=112509 PE=4 SV=1	High																							A0A287NZS4	0	0	0	0	0	0	0	0	0	0	0	0	0	0	0	0	0	0	0	0	0	0	0	0
A0A287MEB9	Uncharacterized protein OS=Hordeum vulgare subsp. vulgare OX=112509 PE=3 SV=1	High																							A0A287MEB9	0	0	0	0	0	0	0	0	0	0	0	0	0	0	0	0	0	0	0	0	0	0	0	0
F2D3W7	Predicted protein OS=Hordeum vulgare subsp. vulgare OX=112509 PE=2 SV=1	High	response to stimulus			Pf00582	-0.490269	0.462228	-0.764618	0.732838	0.189163		1.39566	0.727852	1.02606	0.188842	-0.457938	-0.531619	0.240341	0.0728585	0.494702	-0.459638	-1.56519	0.116816	F2D3W7	0	0	0	0	0	0	0	0	0	0	0	0	0	0	0	0	-1	0	1	0	0	1	0	1
A0A287WJQ6	NTF2 domain-containing protein OS=Hordeum vulgare subsp. vulgare OX=112509 PE=4 SV=1	High																							A0A287WJQ6	0	0	0	0	0	0	0	0	0	0	0	0	0	0	0	0	0	0	0	0	0	0	0	0
A0A287RHB1	Chlorophyll a-b binding protein, chloroplastic OS=Hordeum vulgare subsp. vulgare OX=112509 PE=3 SV=1	High																							A0A287RHB1	0	0	0	0	0	0	0	0	0	0	0	0	0	0	0	0	0	0	0	0	0	0	0	0
F2EKV4	Predicted protein (Fragment) OS=Hordeum vulgare subsp. vulgare OX=112509 PE=2 SV=1	High					0.826969	1.31567	0.559537	-1.76842	0.798146	-1.71789	0.987144	0.507208	0.637379	-0.0128929	0.772503	0.00159341	0.234132	0.557782	1.79201				F2EKV4	0	0	0	-1	0	-1	0	0	0	0	0	0	0	0	1	0	0	0	3	2	0	1	1	0
A0A287JF15	Uncharacterized protein OS=Hordeum vulgare subsp. vulgare OX=112509 PE=4 SV=1	High																							A0A287JF15	0	0	0	0	0	0	0	0	0	0	0	0	0	0	0	0	0	0	0	0	0	0	0	0
A0A287P333	Peptidase_S9 domain-containing protein OS=Hordeum vulgare subsp. vulgare OX=112509 PE=4 SV=1	High																							A0A287P333	0	0	0	0	0	0	0	0	0	0	0	0	0	0	0	0	0	0	0	0	0	0	0	0
Q8W516	SGT1 OS=Hordeum vulgare OX=4513 GN=SGT1 PE=2 SV=1	High			protein binding	Pf00515,Pf04969,Pf05002,Pf07719,Pf12895,Pf13181,Pf13371,Pf13414,Pf13424,Pf13428,Pf13432,Pf14559	-1.61811	-0.279359	-1.08355	1.8332	1.20911	2.20505	0.0706264	-0.0369444	0.199216	0.0648114	0.207021	0.842572	-0.491121	0.0276038	0.234351	-1.24721	-0.529998	-0.538987	Q8W516	-1	0	0	1	0	1	0	0	0	0	0	0	0	0	0	0	0	0	3	3	0	0	2	0
A0A287JZ51	Uncharacterized protein OS=Hordeum vulgare subsp. vulgare OX=112509 PE=4 SV=1	High																							A0A287JZ51	0	0	0	0	0	0	0	0	0	0	0	0	0	0	0	0	0	0	0	0	0	0	0	0
A0A287E9A7	Uncharacterized protein OS=Hordeum vulgare subsp. vulgare OX=112509 PE=4 SV=1	High																							A0A287E9A7	0	0	0	0	0	0	0	0	0	0	0	0	0	0	0	0	0	0	0	0	0	0	0	0
A0A287NNM3	X8 domain-containing protein OS=Hordeum vulgare subsp. vulgare OX=112509 PE=3 SV=1	High																							A0A287NNM3	0	0	0	0	0	0	0	0	0	0	0	0	0	0	0	0	0	0	0	0	0	0	0	0
A0A287QH10	Uncharacterized protein OS=Hordeum vulgare subsp. vulgare OX=112509 PE=4 SV=1	High																							A0A287QH10	0	0	0	0	0	0	0	0	0	0	0	0	0	0	0	0	0	0	0	0	0	0	0	0
M0XPS6	VDE domain-containing protein OS=Hordeum vulgare subsp. vulgare OX=112509 PE=4 SV=1	High	metabolic process		catalytic activity	Pf05670,Pf07137																			M0XPS6	0	0	0	0	0	0	0	0	0	0	0	0	0	0	0	0	0	0	0	0	0	0	0	0
A0A287QNY6	Uncharacterized protein OS=Hordeum vulgare subsp. vulgare OX=112509 PE=4 SV=1	High					0.155935	0.0293111	0.0561867	0.22613	-0.0061694	-0.157587	-0.150481	0.245605	0.132975	0.859086	0.481128	0.799477	-0.969063		-0.257859	-0.147709		0.125115	A0A287QNY6	0	0	0	0	0	0	0	0	0	0	0	0	0	0	0	0	0	0	0	0	0	0	0	0
A0A287DTW9	BOWMAN_BIRK domain-containing protein OS=Hordeum vulgare subsp. vulgare OX=112509 PE=4 SV=1	High																							A0A287DTW9	0	0	0	0	0	0	0	0	0	0	0	0	0	0	0	0	0	0	0	0	0	0	0	0
F2EC17	Cytochrome b-c1 complex subunit 6 OS=Hordeum vulgare subsp. vulgare OX=112509 PE=2 SV=1	High	metabolic process;transport	membrane;mitochondrion	catalytic activity;transporter activity	Pf02320																			F2EC17	0	0	0	0	0	0	0	0	0	0	0	0	0	0	0	0	0	0	0	0	0	0	0	0
F2DQ96	Predicted protein OS=Hordeum vulgare subsp. vulgare OX=112509 PE=2 SV=1	High		membrane			0.0485327	-0.257081	-0.697542	1.43961	0.798751	1.42915	0.0896629	0.0956585	0.189608	0.987161	0.468955	1.25985	-0.68676	-0.110187	-0.0110751	-0.580731	-0.65438	0.156344	F2DQ96	0	0	0	0	0	0	0	0	0	0	0	0	0	0	0	0	0	0	0	0	0	0	0	0
A0A287GJK1	Ribosomal_L12 domain-containing protein OS=Hordeum vulgare subsp. vulgare OX=112509 PE=3 SV=1	High																							A0A287GJK1	0	0	0	0	0	0	0	0	0	0	0	0	0	0	0	0	0	0	0	0	0	0	0	0
A0A287PVR9	MLO-like protein OS=Hordeum vulgare subsp. vulgare OX=112509 PE=4 SV=1	High																							A0A287PVR9	0	0	0	0	0	0	0	0	0	0	0	0	0	0	0	0	0	0	0	0	0	0	0	0
A0A287RSZ8	Uncharacterized protein OS=Hordeum vulgare subsp. vulgare OX=112509 PE=4 SV=1	High					-1.05305	-0.51627	-0.857051	0.650077	0.400609	0.841941	0.0161193	0.129952	-0.0236603	0.358639	0.341559	0.715873	-0.730772	-0.486113	-0.71873	-1.41433	-1.58256	-1.18264	A0A287RSZ8	0	0	0	0	0	0	0	0	0	0	0	0	0	0	0	0	-1	0	1	0	0	1	0	1
A0A287LNX8	Uncharacterized protein OS=Hordeum vulgare subsp. vulgare OX=112509 PE=4 SV=1	High																							A0A287LNX8	0	0	0	0	0	0	0	0	0	0	0	0	0	0	0	0	0	0	0	0	0	0	0	0
A0A287X7Y0	Uncharacterized protein OS=Hordeum vulgare subsp. vulgare OX=112509 PE=4 SV=1	High					0.043167	0.612119	1.52761	-0.925958	1.12582	-0.254521	-0.0514072	-0.181035	0.0456353	-1.35169	-0.207763	-0.635526	2.03325	1.659	0.985816				A0A287X7Y0	0	0	1	0	0	0	0	0	0	0	0	0	1	1	0	0	0	0	3	1	0	2	1	1
Q9M6N6	RNase S-like protein OS=Hordeum vulgare OX=4513 GN=rsh1 PE=3 SV=1	High	metabolic process		catalytic activity;RNA binding	Pf00445																			Q9M6N6	0	0	0	0	0	0	0	0	0	0	0	0	0	0	0	0	0	0	0	0	0	0	0	0
A0A287JR75	Uncharacterized protein OS=Hordeum vulgare subsp. vulgare OX=112509 PE=4 SV=1	High					0.0371275	0.387317	0.40666	0.878672	0.117214	0.604216	-0.384172	-0.910755	-1.3895	0.677666	0.133343	0.515043	-0.727746		1.04026	-0.0837585	-1.14862	-0.598421	A0A287JR75	0	0	0	0	0	0	0	0	0	0	0	0	0	0	0	0	0	0	0	0	0	0	0	0
F2DC79	Predicted protein OS=Hordeum vulgare subsp. vulgare OX=112509 PE=2 SV=1	High	metabolic process		catalytic activity	Pf00704																			F2DC79	0	0	0	0	0	0	0	0	0	0	0	0	0	0	0	0	0	0	0	0	0	0	0	0
F2CXP5	Predicted protein (Fragment) OS=Hordeum vulgare subsp. vulgare OX=112509 PE=2 SV=1	High			DNA binding	Pf03479	0.221365	-0.234291	0.000424027	0.413918	0.567547	-0.0411107	0.0460655	0.314901	-0.168126	0.217721	-0.163958	0.011659	-0.342702	-0.361054	0.0686738	-0.0343252	-0.75883	0.00155519	F2CXP5	0	0	0	0	0	0	0	0	0	0	0	0	0	0	0	0	0	0	0	0	0	0	0	0
A0A287F6C3	Uncharacterized protein OS=Hordeum vulgare subsp. vulgare OX=112509 PE=4 SV=1	High					-0.00761655	-0.220531	-0.675156	-0.146076	0.274328	0.269179	0.19452	0.182105	0.286926	0.437169	0.0249788	0.51494	-0.471046	-0.0379649	-0.212354	0.261257	-0.27778	0.61357	A0A287F6C3	0	0	0	0	0	0	0	0	0	0	0	0	0	0	0	0	0	0	0	0	0	0	0	0
F2E8Q1	Predicted protein OS=Hordeum vulgare subsp. vulgare OX=112509 PE=2 SV=1	High			metal ion binding;protein binding;RNA binding	Pf00076,Pf00630,Pf13893,Pf14259																			F2E8Q1	0	0	0	0	0	0	0	0	0	0	0	0	0	0	0	0	0	0	0	0	0	0	0	0
A0A287XBC2	Uncharacterized protein OS=Hordeum vulgare subsp. vulgare OX=112509 PE=4 SV=1	High					0.376378	-0.0681607	0.440164	-0.0702236	1.68422	0.701481				0.294159	0.923276	0.351127	-0.660587	-1.11616	-1.16039	0.934598	0.415994	1.34066	A0A287XBC2	0	0	0	0	0	0	0	0	0	0	0	0	0	0	0	0	0	0	0	0	0	0	0	0
M0VIJ4	W2 domain-containing protein OS=Hordeum vulgare subsp. vulgare OX=112509 PE=4 SV=1	High	metabolic process		protein binding;RNA binding	Pf01873,Pf02020																			M0VIJ4	0	0	0	0	0	0	0	0	0	0	0	0	0	0	0	0	0	0	0	0	0	0	0	0
A0A287PA58	PWI domain-containing protein OS=Hordeum vulgare subsp. vulgare OX=112509 PE=4 SV=1	High					0.0468947	0.178153	0.0396668	0.902056	1.43601	0.598266	-0.951392	-0.289429	-0.566681	0.339153	0.175924	0.894306	0.076969	-0.385111	0.486791	-1.37389		0.0478331	A0A287PA58	0	0	0	0	0	0	0	0	0	0	0	0	0	0	0	0	0	0	0	0	0	0	0	0
F2EC97	Predicted protein OS=Hordeum vulgare subsp. vulgare OX=112509 PE=2 SV=1	High	transport		RNA binding	Pf00076,Pf02136,Pf13893,Pf14259	0.0552697	-0.0691839	-1.12508	0.689191	0.999305	1.05142	-0.157796	0.355427	-0.0912114	0.291662	0.231654	0.839594	-0.6181	-0.459621	-0.893045	-0.80108	-1.31117	-0.226219	F2EC97	0	0	0	0	0	0	0	0	0	0	0	0	0	0	0	0	0	0	0	0	0	0	0	0
F2DBW7	Predicted protein OS=Hordeum vulgare subsp. vulgare OX=112509 PE=2 SV=1	High	metabolic process	ribosome	structural molecule activity	Pf01248																			F2DBW7	0	0	0	0	0	0	0	0	0	0	0	0	0	0	0	0	0	0	0	0	0	0	0	0
A0A287K2A4	PB1 domain-containing protein OS=Hordeum vulgare subsp. vulgare OX=112509 PE=4 SV=1	High					0.144116	0.126672	0.0233612	-0.20021	0.018593	-0.0904176	0.160488	0.646035	0.439666	0.560455	0.110267	0.361343	-0.20228		-0.339867	-0.572359	-0.823896	0.0811661	A0A287K2A4	0	0	0	0	0	0	0	0	0	0	0	0	0	0	0	0	0	0	0	0	0	0	0	0
F2DUC6	Predicted protein OS=Hordeum vulgare subsp. vulgare OX=112509 PE=2 SV=1	High																							F2DUC6	0	0	0	0	0	0	0	0	0	0	0	0	0	0	0	0	0	0	0	0	0	0	0	0
B0BKB1	Superal1 (Fragment) OS=Hordeum vulgare subsp. vulgare OX=112509 GN=sal1 PE=4 SV=1	High	transport			Pf03357																			B0BKB1	0	0	0	0	0	0	0	0	0	0	0	0	0	0	0	0	0	0	0	0	0	0	0	0
F2DV27	Predicted protein OS=Hordeum vulgare subsp. vulgare OX=112509 PE=2 SV=1	High					0.398248	0.895731	0.562511	0.62814	0.210233	0.841408	0.179846	0.0886296	-0.294061	0.914293	0.632015	0.738673				-0.055304	0.0011877	1.42897	F2DV27	0	0	0	0	0	0	0	0	0	0	0	0	0	0	0	0	0	0	0	0	0	0	0	0
A0A287X9T4	AAA domain-containing protein OS=Hordeum vulgare subsp. vulgare OX=112509 PE=3 SV=1	High																							A0A287X9T4	0	0	0	0	0	0	0	0	0	0	0	0	0	0	0	0	0	0	0	0	0	0	0	0
A0A287NKH3	Protein kinase domain-containing protein OS=Hordeum vulgare subsp. vulgare OX=112509 PE=3 SV=1	High																							A0A287NKH3	0	0	0	0	0	0	0	0	0	0	0	0	0	0	0	0	0	0	0	0	0	0	0	0
F2D029	Predicted protein (Fragment) OS=Hordeum vulgare subsp. vulgare OX=112509 PE=2 SV=1	High	regulation of biological process	extracellular	enzyme regulator activity																				F2D029	0	0	0	0	0	0	0	0	0	0	0	0	0	0	0	0	0	0	0	0	0	0	0	0
F2CQI5	Protein transport protein Sec61 subunit beta OS=Hordeum vulgare subsp. vulgare OX=112509 PE=2 SV=1	High	transport	endoplasmic reticulum;membrane		Pf03911																			F2CQI5	0	0	0	0	0	0	0	0	0	0	0	0	0	0	0	0	0	0	0	0	0	0	0	0
A0A287RDY1	Uncharacterized protein OS=Hordeum vulgare subsp. vulgare OX=112509 PE=4 SV=1	High																							A0A287RDY1	0	0	0	0	0	0	0	0	0	0	0	0	0	0	0	0	0	0	0	0	0	0	0	0
F2D273	Predicted protein (Fragment) OS=Hordeum vulgare subsp. vulgare OX=112509 PE=2 SV=1	High				Pf05701																			F2D273	0	0	0	0	0	0	0	0	0	0	0	0	0	0	0	0	0	0	0	0	0	0	0	0
F2DU10	Predicted protein OS=Hordeum vulgare subsp. vulgare OX=112509 PE=2 SV=1	High			RNA binding	Pf14259																			F2DU10	0	0	0	0	0	0	0	0	0	0	0	0	0	0	0	0	0	0	0	0	0	0	0	0
A0A287WWA1	Aha1_N domain-containing protein OS=Hordeum vulgare subsp. vulgare OX=112509 PE=4 SV=1	High																							A0A287WWA1	0	0	0	0	0	0	0	0	0	0	0	0	0	0	0	0	0	0	0	0	0	0	0	0
A0A287KWJ3	Uncharacterized protein OS=Hordeum vulgare subsp. vulgare OX=112509 PE=4 SV=1	High					-1.28749	-0.245481	-0.793435	0.143643	-0.0898484	-0.603367	-0.165229	0.200109	-0.341873	0.185281	-0.408262	-0.105139	0.160094		-0.0949592	-1.34396	-0.205589	0.200663	A0A287KWJ3	0	0	0	0	0	0	0	0	0	0	0	0	0	0	0	0	0	0	0	0	0	0	0	0
A0A287KYQ2	V-type proton ATPase subunit F OS=Hordeum vulgare subsp. vulgare OX=112509 PE=4 SV=1	High																							A0A287KYQ2	0	0	0	0	0	0	0	0	0	0	0	0	0	0	0	0	0	0	0	0	0	0	0	0
A0A287RSN6	C3H1-type domain-containing protein OS=Hordeum vulgare subsp. vulgare OX=112509 PE=4 SV=1	High																							A0A287RSN6	0	0	0	0	0	0	0	0	0	0	0	0	0	0	0	0	0	0	0	0	0	0	0	0
A0A287K0A3	Uncharacterized protein OS=Hordeum vulgare subsp. vulgare OX=112509 PE=4 SV=1	High																							A0A287K0A3	0	0	0	0	0	0	0	0	0	0	0	0	0	0	0	0	0	0	0	0	0	0	0	0
F2E698	Predicted protein OS=Hordeum vulgare subsp. vulgare OX=112509 PE=2 SV=1	High	metabolic process		protein binding	Pf00888,Pf10557	-0.308318	-0.570231	-0.7274	-0.0818476	2.04962	-0.0730877	-0.737499	-1.1179	-0.717922	-1.00033	-0.564556	-0.872711		0.172515	0.100916	-0.163291	0.61023	-1.45357	F2E698	0	0	0	0	1	0	0	0	0	0	0	0	0	0	0	0	0	0	1	1	0	0	0	1
A0A287J037	H15 domain-containing protein OS=Hordeum vulgare subsp. vulgare OX=112509 PE=3 SV=1	High					-0.190004	-0.344259	0.178005	-0.918933		-0.584723	-0.731606	-0.984418	-0.72463	0.138893	-0.4698	0.591115	-0.895575	-0.949876	-0.532258	-0.542144	-0.821967	-0.28552	A0A287J037	0	0	0	0	0	0	0	0	0	0	0	0	0	0	0	0	0	0	0	0	0	0	0	0
F2DQZ3	Predicted protein OS=Hordeum vulgare subsp. vulgare OX=112509 PE=2 SV=1	High																							F2DQZ3	0	0	0	0	0	0	0	0	0	0	0	0	0	0	0	0	0	0	0	0	0	0	0	0
F2CTW7	Predicted protein OS=Hordeum vulgare subsp. vulgare OX=112509 PE=2 SV=1	High	metabolic process	membrane	metal ion binding	Pf05757	0.549352	0.907249	0.900518	0.199179	-0.216498	0.136941	-0.0111129	0.188381	-0.27787	-0.328922	0.110975	-0.533451	0.53424	0.521382	0.282373	0.0715331	0.637432	-0.453164	F2CTW7	0	0	0	0	0	0	0	0	0	0	0	0	0	0	0	0	0	0	0	0	0	0	0	0
F2E789	Predicted protein OS=Hordeum vulgare subsp. vulgare OX=112509 PE=2 SV=1	High	metabolic process		catalytic activity	Pf01055,Pf13802	-0.215732	0.278969	-1.11851	1.45286	1.16928	1.01412	-0.253596	-0.121471	-0.601696	0.401339	0.207259	0.271883	-2.40618	-0.914964	-0.119358	-0.763885		0.63626	F2E789	0	0	0	0	0	0	0	0	0	0	0	0	-1	0	0	0	0	0	1	0	0	1	1	0
F2D2K5	Predicted protein OS=Hordeum vulgare subsp. vulgare OX=112509 PE=2 SV=1	High	metabolic process		catalytic activity	Pf03767																			F2D2K5	0	0	0	0	0	0	0	0	0	0	0	0	0	0	0	0	0	0	0	0	0	0	0	0
A0A287KLM6	Uncharacterized protein OS=Hordeum vulgare subsp. vulgare OX=112509 PE=4 SV=1	High					-0.276437	-0.218054	-0.39449	-0.574507	0.246099	-0.599848	0.359376	0.0249811	-0.0939627	-0.0484413	0.165824	-0.204301	-0.342063	-0.0222255	0.470893	0.115768	0.196152	0.401056	A0A287KLM6	0	0	0	0	0	0	0	0	0	0	0	0	0	0	0	0	0	0	0	0	0	0	0	0
A0A287LZU1	Uncharacterized protein OS=Hordeum vulgare subsp. vulgare OX=112509 PE=3 SV=1	High					-0.0953083	0.249499	-0.124051	0.123367	-0.0512977	-0.638846	0.292989	0.150236	0.170729	0.285832	0.0269831	0.31591	-0.738326	-0.0560913	-0.353614	1.1819	0.140373	0.810914	A0A287LZU1	0	0	0	0	0	0	0	0	0	0	0	0	0	0	0	0	0	0	0	0	0	0	0	0
A0A287U4U9	EFG_C domain-containing protein OS=Hordeum vulgare subsp. vulgare OX=112509 PE=4 SV=1	High																							A0A287U4U9	0	0	0	0	0	0	0	0	0	0	0	0	0	0	0	0	0	0	0	0	0	0	0	0
A0A287NU14	Uncharacterized protein OS=Hordeum vulgare subsp. vulgare OX=112509 PE=4 SV=1	High																							A0A287NU14	0	0	0	0	0	0	0	0	0	0	0	0	0	0	0	0	0	0	0	0	0	0	0	0
F2E3X7	Predicted protein OS=Hordeum vulgare subsp. vulgare OX=112509 PE=2 SV=1	High			DNA binding	Pf00249,Pf13921																			F2E3X7	0	0	0	0	0	0	0	0	0	0	0	0	0	0	0	0	0	0	0	0	0	0	0	0
A0A287QS95	FeThRed_A domain-containing protein OS=Hordeum vulgare subsp. vulgare OX=112509 PE=4 SV=1	High					0.989248	0.507144	-0.150845	-0.676745	1.23849	0.522769	0.249111	0.428826	0.191697	-0.816262	-0.457873	-0.213596	-1.68887	-0.918563		-0.601391	-0.385674	0.424255	A0A287QS95	0	0	0	0	0	0	0	0	0	0	0	0	0	0	0	0	0	0	0	0	0	0	0	0
Q8GT52	Hexose transporter OS=Hordeum vulgare OX=4513 GN=stp1 PE=2 SV=1	High	transport	membrane	transporter activity	Pf00083,Pf06609,Pf07690,Pf13347	-1.25667	-1.49544	0.2571	-0.732689	-0.204686	-0.0666043	-0.112549	1.49905	0.272782	-0.73541	0.837379	0.761966	-1.5819	0.56747	0.0507729	-2.23498	-0.835322	-2.05451	Q8GT52	0	0	0	0	0	0	0	0	0	0	0	0	-1	0	0	-1	0	-1	3	0	0	3	2	0
F2D875	Predicted protein OS=Hordeum vulgare subsp. vulgare OX=112509 PE=2 SV=1	High	transport			Pf00638																			F2D875	0	0	0	0	0	0	0	0	0	0	0	0	0	0	0	0	0	0	0	0	0	0	0	0
A0A287I2B5	S1 motif domain-containing protein OS=Hordeum vulgare subsp. vulgare OX=112509 PE=4 SV=1	High					0.203855	0.152827	-0.717707	0.154168	0.17689	0.183483	0.102013	-0.0829022	0.0994369	0.207986	0.0257154	-0.153289	0.218598	-0.321699	0.217438	0.104661	-0.27268	0.180583	A0A287I2B5	0	0	0	0	0	0	0	0	0	0	0	0	0	0	0	0	0	0	0	0	0	0	0	0
F2D652	Predicted protein OS=Hordeum vulgare subsp. vulgare OX=112509 PE=2 SV=1	High																							F2D652	0	0	0	0	0	0	0	0	0	0	0	0	0	0	0	0	0	0	0	0	0	0	0	0
A0A287J8Y5	Thioredoxin domain-containing protein OS=Hordeum vulgare subsp. vulgare OX=112509 PE=4 SV=1	High																							A0A287J8Y5	0	0	0	0	0	0	0	0	0	0	0	0	0	0	0	0	0	0	0	0	0	0	0	0
Q9S8N1	Calmodulin (Fragment) OS=Hordeum vulgare OX=4513 PE=1 SV=1	High					-0.173938	-0.102464	-0.555848	-0.0431026	0.00240668	-0.088521	-0.611783	-0.17988	-0.27776	0.369542	0.188251	0.166589	-1.1718	-0.227587	-0.420911	-0.222362	-0.146047	0.0400528	Q9S8N1	0	0	0	0	0	0	0	0	0	0	0	0	0	0	0	0	0	0	0	0	0	0	0	0
F2DI16	Predicted protein (Fragment) OS=Hordeum vulgare subsp. vulgare OX=112509 PE=2 SV=1	High	metabolic process		catalytic activity	Pf09412																			F2DI16	0	0	0	0	0	0	0	0	0	0	0	0	0	0	0	0	0	0	0	0	0	0	0	0
M0VXY0	Uncharacterized protein OS=Hordeum vulgare subsp. vulgare OX=112509 PE=4 SV=1	High				Pf00504	0.267768	-0.0105267	-1.03191	-0.445443	0.27878	-0.958882	-0.0421311	-0.39843	-0.171793	0.188863	0.0149037	-0.288929	-0.727746	-0.298438	0.324719	-0.186268	-0.804048	-0.824128	M0VXY0	0	0	0	0	0	0	0	0	0	0	0	0	0	0	0	0	0	0	0	0	0	0	0	0
A0A287SNR6	Uncharacterized protein OS=Hordeum vulgare subsp. vulgare OX=112509 PE=4 SV=1	High					0.190686	0.598809	1.1314	-0.390323	-0.952256	-0.453296	0.285669	0.045131	0.113927	-0.771915	-0.0864884	-0.284166	1.39044	0.727555	0.570432	0.645512	0.937248	-1.29684	A0A287SNR6	0	0	0	0	0	0	0	0	0	0	0	0	0	0	0	0	0	0	0	0	0	0	0	0
M0WPP4	AA_TRNA_LIGASE_II domain-containing protein OS=Hordeum vulgare subsp. vulgare OX=112509 PE=3 SV=1	High	development;metabolic process;regulation of biological process	cytoplasm;mitochondrion	catalytic activity;nucleotide binding	Pf00587,Pf03129,Pf09180																			M0WPP4	0	0	0	0	0	0	0	0	0	0	0	0	0	0	0	0	0	0	0	0	0	0	0	0
A0A287KQU1	Peptidase S59 domain-containing protein OS=Hordeum vulgare subsp. vulgare OX=112509 PE=4 SV=1	High																							A0A287KQU1	0	0	0	0	0	0	0	0	0	0	0	0	0	0	0	0	0	0	0	0	0	0	0	0
F2DLC9	Predicted protein (Fragment) OS=Hordeum vulgare subsp. vulgare OX=112509 PE=2 SV=1	High		cytosol;membrane																					F2DLC9	0	0	0	0	0	0	0	0	0	0	0	0	0	0	0	0	0	0	0	0	0	0	0	0
A0A287TWD1	Uncharacterized protein OS=Hordeum vulgare subsp. vulgare OX=112509 PE=4 SV=1	High					-0.468707	-0.314179	-0.352588	-0.271363	-0.351105	-0.204218	-0.309819	0.0135845	-0.0937293	-0.269054	0.227515	0.250104	-0.123205	0.744784	0.266871	0.856885		0.264738	A0A287TWD1	0	0	0	0	0	0	0	0	0	0	0	0	0	0	0	0	0	0	0	0	0	0	0	0
A0A287I6S0	Glutamyl-tRNA(Gln) amidotransferase subunit B, chloroplastic/mitochondrial OS=Hordeum vulgare subsp. vulgare OX=112509 PE=4 SV=1	High																							A0A287I6S0	0	0	0	0	0	0	0	0	0	0	0	0	0	0	0	0	0	0	0	0	0	0	0	0
A0A287E3R9	Histone H2A OS=Hordeum vulgare subsp. vulgare OX=112509 PE=3 SV=1	High																							A0A287E3R9	0	0	0	0	0	0	0	0	0	0	0	0	0	0	0	0	0	0	0	0	0	0	0	0
A0A287LV07	Arf-GAP domain-containing protein OS=Hordeum vulgare subsp. vulgare OX=112509 PE=4 SV=1	High					0.860554	1.24358	0.673799	-0.607244	0.353139	0.0535463	0.794683	0.84535	0.903466	0.790338	0.939945	0.217308	0.65326	0.285566	-0.315822	0.183002	0.687835	1.02502	A0A287LV07	0	0	0	0	0	0	0	0	0	0	0	0	0	0	0	0	0	0	0	0	0	0	0	0
M0XC79	Uncharacterized protein OS=Hordeum vulgare subsp. vulgare OX=112509 PE=4 SV=1	High	transport			Pf00790,Pf03127																			M0XC79	0	0	0	0	0	0	0	0	0	0	0	0	0	0	0	0	0	0	0	0	0	0	0	0
F2CRM7	Translation factor GUF1 homolog, chloroplastic OS=Hordeum vulgare subsp. vulgare OX=112509 PE=2 SV=1	High	metabolic process;regulation of biological process;response to stimulus		catalytic activity;nucleotide binding	Pf00009,Pf00071,Pf00679,Pf02421,Pf03144,Pf06421,Pf09439,Pf14492	0.692218	1.14816	0.45997	-1.45591	-1.19918		0.274974	0.198731	-0.348015	-1.19816	0.478377	-0.614665	-1.27469	-0.506645	-0.672107	0.279363	0.581695	1.12411	F2CRM7	0	0	0	0	0	0	0	0	0	0	0	0	0	0	0	0	0	0	0	0	0	0	0	0
A0A287EBD3	Ribosomal protein S7 OS=Hordeum vulgare subsp. vulgare OX=112509 PE=3 SV=1	High					-1.82871	0.102004	-0.282481	0.24052	0.633379	0.189872	-1.17152	-0.101034	-1.57438	-0.712892	0.508216	-0.530845	2.00132		1.58069	0.187691	-1.75266	-2.58054	A0A287EBD3	-1	0	0	0	0	0	0	0	-1	0	0	0	1	0	1	0	-1	-1	6	1	1	4	2	1
F2D2B6	Predicted protein OS=Hordeum vulgare subsp. vulgare OX=112509 PE=2 SV=1	High	metabolic process;response to stimulus		nucleotide binding;protein binding	Pf00183,Pf02518,Pf13589	-0.298484	-0.324343	-0.786564	-1.61365	-1.45733	-1.3062	0.523877	0.993773	0.184767	0.0754662	-0.0492858	-0.874655	-1.68997	-0.00573135	-0.162892	-1.62097	-1.05638	-0.484224	F2D2B6	0	0	0	-1	0	0	0	0	0	0	0	0	-1	0	0	-1	0	0	3	1	0	2	3	0
M0WC90	Rhodanese domain-containing protein OS=Hordeum vulgare subsp. vulgare OX=112509 PE=4 SV=1	High				Pf00581																			M0WC90	0	0	0	0	0	0	0	0	0	0	0	0	0	0	0	0	0	0	0	0	0	0	0	0
M0UJC9	Uncharacterized protein OS=Hordeum vulgare subsp. vulgare OX=112509 PE=4 SV=1	High																							M0UJC9	0	0	0	0	0	0	0	0	0	0	0	0	0	0	0	0	0	0	0	0	0	0	0	0
A0A287JBF8	Uncharacterized protein OS=Hordeum vulgare subsp. vulgare OX=112509 PE=4 SV=1	High					-0.506711	0.249891	-0.550756	0.238567	-0.792881	-0.841566	-0.243171	-0.0975108	0.230453	-0.609518	-0.573021	-0.485908	-0.578818	-0.485255	-0.393923	-0.981847	-0.758739	-0.478407	A0A287JBF8	0	0	0	0	0	0	0	0	0	0	0	0	0	0	0	0	0	0	0	0	0	0	0	0
A0A287RSS8	Epimerase domain-containing protein OS=Hordeum vulgare subsp. vulgare OX=112509 PE=4 SV=1	High																							A0A287RSS8	0	0	0	0	0	0	0	0	0	0	0	0	0	0	0	0	0	0	0	0	0	0	0	0
A0A287LT41	SUI1 domain-containing protein OS=Hordeum vulgare subsp. vulgare OX=112509 PE=4 SV=1	High					0.244042	-0.17993	0.203907	0.612191	-0.0132242	0.418893	-0.040051	-0.171273	-0.0197677	0.851742	0.338501	0.988112	-0.829038	-0.683976	-0.422793	0.297623	-0.44648	0.483979	A0A287LT41	0	0	0	0	0	0	0	0	0	0	0	0	0	0	0	0	0	0	0	0	0	0	0	0
A0A287MAN7	Aldedh domain-containing protein OS=Hordeum vulgare subsp. vulgare OX=112509 PE=3 SV=1	High					1.1999	1.09804	1.54302	0.422169	-0.159637	0.620834	0.385346	0.373186	0.571858	0.362787	0.327919	1.08988	0.862105	0.424618	-0.0910027	-0.0666425	-0.281568	1.4619	A0A287MAN7	0	0	1	0	0	0	0	0	0	0	0	0	0	0	0	0	0	0	1	1	0	0	0	0
O49872	RpS28 OS=Hordeum vulgare OX=4513 PE=2 SV=1	High	metabolic process	ribosome	structural molecule activity	Pf01200																			O49872	0	0	0	0	0	0	0	0	0	0	0	0	0	0	0	0	0	0	0	0	0	0	0	0
A0A287F8Z7	Non-specific serine/threonine protein kinase OS=Hordeum vulgare subsp. vulgare OX=112509 PE=4 SV=1	High					-0.0280708	-0.3441	-0.250939	-0.144662	0.694439	-0.35522	0.229512	0.282039	-0.20828	0.446781	0.434029	0.0717576	-0.152287	0.347278	0.362919	0.142485	0.0569562	-0.00488058	A0A287F8Z7	0	0	0	0	0	0	0	0	0	0	0	0	0	0	0	0	0	0	0	0	0	0	0	0
A0A287E7Z5	Rhodanese domain-containing protein OS=Hordeum vulgare subsp. vulgare OX=112509 PE=4 SV=1	High																							A0A287E7Z5	0	0	0	0	0	0	0	0	0	0	0	0	0	0	0	0	0	0	0	0	0	0	0	0
A0A0K0YH82	NADH dehydrogenase subunit 7 OS=Hordeum vulgare subsp. spontaneum OX=77009 GN=nad7 PE=2 SV=1	High	metabolic process	mitochondrion	catalytic activity;nucleotide binding	Pf00346																			A0A0K0YH82	0	0	0	0	0	0	0	0	0	0	0	0	0	0	0	0	0	0	0	0	0	0	0	0
A0A287U5N0	Uncharacterized protein OS=Hordeum vulgare subsp. vulgare OX=112509 PE=3 SV=1	High																							A0A287U5N0	0	0	0	0	0	0	0	0	0	0	0	0	0	0	0	0	0	0	0	0	0	0	0	0
A0A2C9NIC5	Ribosomal protein S12 OS=Hordeum vulgare subsp. vulgare OX=112509 GN=rps12 PE=3 SV=1	High																							A0A2C9NIC5	0	0	0	0	0	0	0	0	0	0	0	0	0	0	0	0	0	0	0	0	0	0	0	0
A0A287VJK9	Flavin-containing monooxygenase OS=Hordeum vulgare subsp. vulgare OX=112509 PE=3 SV=1	High																							A0A287VJK9	0	0	0	0	0	0	0	0	0	0	0	0	0	0	0	0	0	0	0	0	0	0	0	0
A0A287GI21	Uncharacterized protein OS=Hordeum vulgare subsp. vulgare OX=112509 PE=4 SV=1	High																							A0A287GI21	0	0	0	0	0	0	0	0	0	0	0	0	0	0	0	0	0	0	0	0	0	0	0	0
A0A287LY20	Uncharacterized protein OS=Hordeum vulgare subsp. vulgare OX=112509 PE=4 SV=1	High																							A0A287LY20	0	0	0	0	0	0	0	0	0	0	0	0	0	0	0	0	0	0	0	0	0	0	0	0
A0A287WMV2	Cytochrome c domain-containing protein OS=Hordeum vulgare subsp. vulgare OX=112509 PE=4 SV=1	High																							A0A287WMV2	0	0	0	0	0	0	0	0	0	0	0	0	0	0	0	0	0	0	0	0	0	0	0	0
F2DT83	Predicted protein (Fragment) OS=Hordeum vulgare subsp. vulgare OX=112509 PE=2 SV=1	High	transport	membrane	transporter activity	Pf01103,Pf07244																			F2DT83	0	0	0	0	0	0	0	0	0	0	0	0	0	0	0	0	0	0	0	0	0	0	0	0
A0A287N2U4	Uncharacterized protein OS=Hordeum vulgare subsp. vulgare OX=112509 PE=3 SV=1	High																							A0A287N2U4	0	0	0	0	0	0	0	0	0	0	0	0	0	0	0	0	0	0	0	0	0	0	0	0
A0A287V1M7	Uncharacterized protein OS=Hordeum vulgare subsp. vulgare OX=112509 PE=4 SV=1	High					0.287213	0.147814	0.432662	0.694908	0.146082	0.496473	0.0522786	0.398602	0.0403152	0.656597	0.0552802	0.558107							A0A287V1M7	0	0	0	0	0	0	0	0	0	0	0	0	0	0	0	0	0	0	0	0	0	0	0	0
A0A287UAM7	Succinate-CoA ligase subunit beta OS=Hordeum vulgare subsp. vulgare OX=112509 PE=3 SV=1	High																							A0A287UAM7	0	0	0	0	0	0	0	0	0	0	0	0	0	0	0	0	0	0	0	0	0	0	0	0
A0A287JVF9	HDAC_interact domain-containing protein OS=Hordeum vulgare subsp. vulgare OX=112509 PE=4 SV=1	High																							A0A287JVF9	0	0	0	0	0	0	0	0	0	0	0	0	0	0	0	0	0	0	0	0	0	0	0	0
M0V1S6	Uncharacterized protein OS=Hordeum vulgare subsp. vulgare OX=112509 PE=4 SV=1	High		membrane			-0.572106	0.121125	-1.31588		0.765465	-0.730532	-0.610653	0.128385	-0.347578	-0.885341	0.277005	-1.27058	0.0473503	-0.161939	-0.210603	-0.326323	-0.113057	-0.745649	M0V1S6	0	0	0	0	0	0	0	0	0	0	0	0	0	0	0	0	0	0	0	0	0	0	0	0
A0A287QMI7	PsbP domain-containing protein OS=Hordeum vulgare subsp. vulgare OX=112509 PE=4 SV=1	High																							A0A287QMI7	0	0	0	0	0	0	0	0	0	0	0	0	0	0	0	0	0	0	0	0	0	0	0	0
A0A287W1K5	Uncharacterized protein OS=Hordeum vulgare subsp. vulgare OX=112509 PE=4 SV=1	High					-0.391216	-1.0876		0.171154	-1.1055	0.0428938	0.235815		0.245541	-0.36446	-1.18585	-0.657477		-0.906262	0.223914	0.144276		-0.744163	A0A287W1K5	0	0	0	0	0	0	0	0	0	0	0	0	0	0	0	0	0	0	0	0	0	0	0	0
A0A287XBP0	Uncharacterized protein OS=Hordeum vulgare subsp. vulgare OX=112509 PE=3 SV=1	High																							A0A287XBP0	0	0	0	0	0	0	0	0	0	0	0	0	0	0	0	0	0	0	0	0	0	0	0	0
Q96565	3-aminomethylindole N-methyltransferase OS=Hordeum vulgare subsp. vulgare OX=112509 PE=1 SV=1	High	metabolic process		catalytic activity;protein binding	Pf00891,Pf05891,Pf08100																			Q96565	0	0	0	0	0	0	0	0	0	0	0	0	0	0	0	0	0	0	0	0	0	0	0	0
A0A287QHH5	OTU domain-containing protein OS=Hordeum vulgare subsp. vulgare OX=112509 PE=4 SV=1	High					-0.619596	-0.321012	-1.35992	1.67392	0.126786	1.47093	0.288351	0.247301	0.125127	0.223196	0.675931	0.315029	0.543425	-0.164422	1.37735	-0.306347	-0.455584	-0.108373	A0A287QHH5	0	0	0	1	0	0	0	0	0	0	0	0	0	0	0	0	0	0	1	1	0	0	1	0
A0A287QZG2	Uncharacterized protein OS=Hordeum vulgare subsp. vulgare OX=112509 PE=4 SV=1	High																							A0A287QZG2	0	0	0	0	0	0	0	0	0	0	0	0	0	0	0	0	0	0	0	0	0	0	0	0
A0A287LG02	WD_REPEATS_REGION domain-containing protein OS=Hordeum vulgare subsp. vulgare OX=112509 PE=4 SV=1	High																							A0A287LG02	0	0	0	0	0	0	0	0	0	0	0	0	0	0	0	0	0	0	0	0	0	0	0	0
A0A287VH28	Peptidase A1 domain-containing protein OS=Hordeum vulgare subsp. vulgare OX=112509 PE=3 SV=1	High					0.0513314	0.180068	0.114351	1.42215	0.425468	1.3149	-0.374032	0.0508676	-0.308161	0.513525	0.283395	0.699914	-0.336122	-0.410532	-0.43618	-0.0514074	0.175834	0.431599	A0A287VH28	0	0	0	0	0	0	0	0	0	0	0	0	0	0	0	0	0	0	0	0	0	0	0	0
A0A287UZ04	Aa_trans domain-containing protein OS=Hordeum vulgare subsp. vulgare OX=112509 PE=4 SV=1	High																							A0A287UZ04	0	0	0	0	0	0	0	0	0	0	0	0	0	0	0	0	0	0	0	0	0	0	0	0
A0A287TEE2	NPH3 domain-containing protein OS=Hordeum vulgare subsp. vulgare OX=112509 PE=3 SV=1	High																							A0A287TEE2	0	0	0	0	0	0	0	0	0	0	0	0	0	0	0	0	0	0	0	0	0	0	0	0
A0A287NXW9	Uncharacterized protein OS=Hordeum vulgare subsp. vulgare OX=112509 PE=3 SV=1	High					0.156938	-0.516455	-0.87508	0.169294	-0.491312	-0.0426358	-0.212985	-0.312989	-0.488215	-0.0901975	-0.701121	-0.31705	-0.0108991	-0.778166	-0.253122	-0.236423	-0.786533	-0.219673	A0A287NXW9	0	0	0	0	0	0	0	0	0	0	0	0	0	0	0	0	0	0	0	0	0	0	0	0
A0A287RAP4	Fe-S_biosyn domain-containing protein OS=Hordeum vulgare subsp. vulgare OX=112509 PE=4 SV=1	High					-0.436765	0.2483	0.108662	0.222892	-0.0420506	0.266334	-0.133114	0.0344625	-0.159917	0.00868929	-0.182081	-0.0912405		-0.108222	-0.205524	-0.298996	-0.515559	-0.515108	A0A287RAP4	0	0	0	0	0	0	0	0	0	0	0	0	0	0	0	0	0	0	0	0	0	0	0	0
A0A287EX42	Usp domain-containing protein OS=Hordeum vulgare subsp. vulgare OX=112509 PE=4 SV=1	High					-0.192912	0.646216	1.1945	1.31591	0.854733	0.806318	0.394912	0.28115	0.491546	-0.127009	-0.106096	0.0978735	0.930055	0.644744					A0A287EX42	0	0	0	0	0	0	0	0	0	0	0	0	0	0	0	0	0	0	0	0	0	0	0	0
A0A287W6F7	Uncharacterized protein OS=Hordeum vulgare subsp. vulgare OX=112509 PE=4 SV=1	High																							A0A287W6F7	0	0	0	0	0	0	0	0	0	0	0	0	0	0	0	0	0	0	0	0	0	0	0	0
A0A287FC05	Uncharacterized protein OS=Hordeum vulgare subsp. vulgare OX=112509 PE=4 SV=1	High																							A0A287FC05	0	0	0	0	0	0	0	0	0	0	0	0	0	0	0	0	0	0	0	0	0	0	0	0
F2DMV7	Predicted protein OS=Hordeum vulgare subsp. vulgare OX=112509 PE=2 SV=1	High	metabolic process		metal ion binding;RNA binding	Pf00036,Pf00153,Pf13202,Pf13405,Pf13499,Pf13833	-0.677287	-0.678399	0.651182	-0.362664	-0.0920897	-0.873072	0.975195	-0.052821	-0.180531	-0.704235	-0.182576	-0.121756	-1.13563	-0.61151	-0.458178	-0.586969		-2.11679	F2DMV7	0	0	0	0	0	0	0	0	0	0	0	0	0	0	0	0	0	-1	1	0	0	1	0	0
A0A287UKZ4	TPR_REGION domain-containing protein OS=Hordeum vulgare subsp. vulgare OX=112509 PE=4 SV=1	High					-0.424421	-0.996712	-0.216216	0.258595	0.68754	2.11629	-0.106965	0.252212	-0.265049	0.514317	-0.0794663	1.18906	-0.589988	-0.976055	0.0287582	-0.49466	-0.807079	0.257537	A0A287UKZ4	0	0	0	0	0	1	0	0	0	0	0	0	0	0	0	0	0	0	1	1	0	0	0	0
A0A287JD54	Uncharacterized protein OS=Hordeum vulgare subsp. vulgare OX=112509 PE=4 SV=1	High					0.498086	0.807919	0.830741	0.821294	-0.607351	-0.557411	0.321656	0.519114	0.788407	-0.380168	-0.377411	-0.260633							A0A287JD54	0	0	0	0	0	0	0	0	0	0	0	0	0	0	0	0	0	0	0	0	0	0	0	0
F2CU01	Predicted protein (Fragment) OS=Hordeum vulgare subsp. vulgare OX=112509 PE=2 SV=1	High					0.533477	0.190942	1.07936	0.512221	0.248068	-0.37045	0.0919764	-0.0942564	-0.341493	1.18513	0.63218	1.01065	0.0598214	-0.698566	-0.209273	0.0476285	-0.685959	-1.30781	F2CU01	0	0	0	0	0	0	0	0	0	0	0	0	0	0	0	0	0	0	0	0	0	0	0	0
M0YVZ4	Uncharacterized protein OS=Hordeum vulgare subsp. vulgare OX=112509 PE=4 SV=1	High			protein binding	Pf06232																			M0YVZ4	0	0	0	0	0	0	0	0	0	0	0	0	0	0	0	0	0	0	0	0	0	0	0	0
F2D791	Predicted protein OS=Hordeum vulgare subsp. vulgare OX=112509 PE=2 SV=1	High		membrane		Pf14368	-0.235489	0.395274	0.858834	0.310491	-0.245451	-0.367491	-0.110548	0.489623	0.320293	0.605091	-0.2032	0.311995	-0.647534	-0.642138	-0.358744	-0.848264		0.573115	F2D791	0	0	0	0	0	0	0	0	0	0	0	0	0	0	0	0	0	0	0	0	0	0	0	0
A0A287PQQ9	PAM2 domain-containing protein OS=Hordeum vulgare subsp. vulgare OX=112509 PE=4 SV=1	High					0.332496	0.807843	0.0918142	0.234216	-0.106283	-0.268935	-0.298886	-0.803003	-0.235682	-0.291202	-0.394965	-0.563439	0.399268	-0.899489	-0.780225	-1.83227	-1.04191	-0.750165	A0A287PQQ9	0	0	0	0	0	0	0	0	0	0	0	0	0	0	0	-1	0	0	1	0	0	1	1	0
F2D6T3	Peptidyl-prolyl cis-trans isomerase (Fragment) OS=Hordeum vulgare subsp. vulgare OX=112509 PE=2 SV=1	High	metabolic process		catalytic activity	Pf00160																			F2D6T3	0	0	0	0	0	0	0	0	0	0	0	0	0	0	0	0	0	0	0	0	0	0	0	0
E9LEY2	Heat shock protein 17 OS=Hordeum vulgare subsp. spontaneum OX=77009 GN=Hsp17 PE=3 SV=1	High				Pf00011	-0.242651	0.225659	0.431376	0.408738		0.52656	0.37699	-0.0220151	0.659325	-0.606361	-0.341354	-0.0956771	0.845303	0.211719	0.323579	0.695056	1.12842	0.45701	E9LEY2	0	0	0	0	0	0	0	0	0	0	0	0	0	0	0	0	0	0	0	0	0	0	0	0
A0A287G3R9	Non-specific lipid-transfer protein OS=Hordeum vulgare subsp. vulgare OX=112509 PE=3 SV=1	High																							A0A287G3R9	0	0	0	0	0	0	0	0	0	0	0	0	0	0	0	0	0	0	0	0	0	0	0	0
A0A287JE64	Uncharacterized protein OS=Hordeum vulgare subsp. vulgare OX=112509 PE=4 SV=1	High																							A0A287JE64	0	0	0	0	0	0	0	0	0	0	0	0	0	0	0	0	0	0	0	0	0	0	0	0
M0Z1C9	Ribosomal protein OS=Hordeum vulgare subsp. vulgare OX=112509 PE=3 SV=1	High	metabolic process	ribosome	RNA binding;structural molecule activity	Pf00687																			M0Z1C9	0	0	0	0	0	0	0	0	0	0	0	0	0	0	0	0	0	0	0	0	0	0	0	0
A0A287RZU5	Rhodanese domain-containing protein OS=Hordeum vulgare subsp. vulgare OX=112509 PE=4 SV=1	High					-1.25842	-0.750521	-0.126152		0.0814965	1.04749	-0.306345	-0.021342	0.126941	-0.558757	-0.244658	0.0454155							A0A287RZU5	0	0	0	0	0	0	0	0	0	0	0	0	0	0	0	0	0	0	0	0	0	0	0	0
F2DP90	Predicted protein OS=Hordeum vulgare subsp. vulgare OX=112509 PE=2 SV=1	High	metabolic process;regulation of biological process		DNA binding	Pf02002																			F2DP90	0	0	0	0	0	0	0	0	0	0	0	0	0	0	0	0	0	0	0	0	0	0	0	0
A0A287PBV3	V-type proton ATPase subunit a OS=Hordeum vulgare subsp. vulgare OX=112509 PE=3 SV=1	High																							A0A287PBV3	0	0	0	0	0	0	0	0	0	0	0	0	0	0	0	0	0	0	0	0	0	0	0	0
A0A287IFJ7	OTU domain-containing protein OS=Hordeum vulgare subsp. vulgare OX=112509 PE=4 SV=1	High					-0.242786	0.108408	-0.151414		-0.0360838	1.24745	-0.225496	-0.436344	-0.436772	1.72858	-0.315436	1.58732				-1.36253	-1.16956	-0.348097	A0A287IFJ7	0	0	0	0	0	0	0	0	0	1	0	1	0	0	0	0	0	0	2	0	2	0	1	0
A0A287K1N9	SHSP domain-containing protein OS=Hordeum vulgare subsp. vulgare OX=112509 PE=3 SV=1	High																							A0A287K1N9	0	0	0	0	0	0	0	0	0	0	0	0	0	0	0	0	0	0	0	0	0	0	0	0
A0A287TDC5	Uncharacterized protein OS=Hordeum vulgare subsp. vulgare OX=112509 PE=4 SV=1	High																							A0A287TDC5	0	0	0	0	0	0	0	0	0	0	0	0	0	0	0	0	0	0	0	0	0	0	0	0
A0A287K6S5	Uncharacterized protein OS=Hordeum vulgare subsp. vulgare OX=112509 PE=4 SV=1	High																							A0A287K6S5	0	0	0	0	0	0	0	0	0	0	0	0	0	0	0	0	0	0	0	0	0	0	0	0
F2EIA2	Predicted protein (Fragment) OS=Hordeum vulgare subsp. vulgare OX=112509 PE=2 SV=1	High	metabolic process		catalytic activity;RNA binding	Pf01189																			F2EIA2	0	0	0	0	0	0	0	0	0	0	0	0	0	0	0	0	0	0	0	0	0	0	0	0
M0XM51	Uncharacterized protein OS=Hordeum vulgare subsp. vulgare OX=112509 PE=4 SV=1	High					-0.122956	-0.137201	1.26711	0.153662	-0.0188772	-0.0412168	0.822331	0.732428	0.302025	-0.795535	-0.557169	-0.7956	1.35524	1.04205	0.679661	0.569681	0.864857	-0.808483	M0XM51	0	0	0	0	0	0	0	0	0	0	0	0	0	0	0	0	0	0	0	0	0	0	0	0
F2CS06	Phosphomannomutase OS=Hordeum vulgare subsp. vulgare OX=112509 PE=2 SV=1	High	metabolic process	cytoplasm	catalytic activity	Pf03332,Pf08282																			F2CS06	0	0	0	0	0	0	0	0	0	0	0	0	0	0	0	0	0	0	0	0	0	0	0	0
A0A287E6B0	C2H2-type domain-containing protein OS=Hordeum vulgare subsp. vulgare OX=112509 PE=4 SV=1	High																							A0A287E6B0	0	0	0	0	0	0	0	0	0	0	0	0	0	0	0	0	0	0	0	0	0	0	0	0
A0A287RYT1	Uncharacterized protein OS=Hordeum vulgare subsp. vulgare OX=112509 PE=4 SV=1	High																							A0A287RYT1	0	0	0	0	0	0	0	0	0	0	0	0	0	0	0	0	0	0	0	0	0	0	0	0
A0A287WBQ7	Uncharacterized protein OS=Hordeum vulgare subsp. vulgare OX=112509 PE=4 SV=1	High																							A0A287WBQ7	0	0	0	0	0	0	0	0	0	0	0	0	0	0	0	0	0	0	0	0	0	0	0	0
F2DA54	Predicted protein OS=Hordeum vulgare subsp. vulgare OX=112509 PE=2 SV=1	High				Pf08186	0.516918	0.749655	0.492781	-0.313875	0.0703128		0.366332	0.25961	0.201008	0.472295	0.692902	-0.617779	-0.143314	-0.182648	-0.0113991				F2DA54	0	0	0	0	0	0	0	0	0	0	0	0	0	0	0	0	0	0	0	0	0	0	0	0
F2DXR4	Predicted protein OS=Hordeum vulgare subsp. vulgare OX=112509 PE=2 SV=1	High				Pf03330																			F2DXR4	0	0	0	0	0	0	0	0	0	0	0	0	0	0	0	0	0	0	0	0	0	0	0	0
F2D7T7	Predicted protein OS=Hordeum vulgare subsp. vulgare OX=112509 PE=2 SV=1	High	metabolic process	membrane	catalytic activity	Pf00348																			F2D7T7	0	0	0	0	0	0	0	0	0	0	0	0	0	0	0	0	0	0	0	0	0	0	0	0
A0A287GTT8	Uncharacterized protein OS=Hordeum vulgare subsp. vulgare OX=112509 PE=4 SV=1	High					0.935641	0.836254	-0.342173	1.06486	0.387833	1.39474	0.146844	-0.232279	-0.0165047	-0.0307437	0.602559	0.310181	0.666843	-0.127994	0.0604456	0.836896	0.2445	0.495117	A0A287GTT8	0	0	0	0	0	0	0	0	0	0	0	0	0	0	0	0	0	0	0	0	0	0	0	0
A0A287M426	Uncharacterized protein OS=Hordeum vulgare subsp. vulgare OX=112509 PE=3 SV=1	High					0.605164	1.19843	1.68959	-0.811537	-0.745885	-0.632341	-0.00181527	0.59302	-0.198914	-0.872668	-0.25141	0.518306				0.512668	0.582381	0.573209	A0A287M426	0	0	1	0	0	0	0	0	0	0	0	0	0	0	0	0	0	0	1	1	0	0	0	0
A0A287VX29	Glutathione peroxidase OS=Hordeum vulgare subsp. vulgare OX=112509 PE=3 SV=1	High					-0.070303	0.327657	1.07145	-0.0645683	-0.904948	-0.347127	0.15635	-0.0533585	-0.0176304	-0.79608	-0.35343	-0.2734							A0A287VX29	0	0	0	0	0	0	0	0	0	0	0	0	0	0	0	0	0	0	0	0	0	0	0	0
A0A287P4J4	Uncharacterized protein OS=Hordeum vulgare subsp. vulgare OX=112509 PE=4 SV=1	High																							A0A287P4J4	0	0	0	0	0	0	0	0	0	0	0	0	0	0	0	0	0	0	0	0	0	0	0	0
A0A287HCQ2	Uncharacterized protein OS=Hordeum vulgare subsp. vulgare OX=112509 PE=4 SV=1	High																							A0A287HCQ2	0	0	0	0	0	0	0	0	0	0	0	0	0	0	0	0	0	0	0	0	0	0	0	0
A0A287X615	Uncharacterized protein OS=Hordeum vulgare subsp. vulgare OX=112509 PE=3 SV=1	High																							A0A287X615	0	0	0	0	0	0	0	0	0	0	0	0	0	0	0	0	0	0	0	0	0	0	0	0
A0A287WPQ1	60S ribosomal protein L27 OS=Hordeum vulgare subsp. vulgare OX=112509 PE=3 SV=1	High					-0.67343	-0.693479	-0.0265564	0.27724	0.886625	1.00304	-0.477946	-0.180424	-0.382603	-0.411035	0.52591	-0.0718372	2.09316	0.672985	1.39521	1.08643	0.846648	-0.222491	A0A287WPQ1	0	0	0	0	0	0	0	0	0	0	0	0	1	0	0	0	0	0	1	0	0	1	1	0
A0A287K7P3	Uncharacterized protein OS=Hordeum vulgare subsp. vulgare OX=112509 PE=4 SV=1	High																							A0A287K7P3	0	0	0	0	0	0	0	0	0	0	0	0	0	0	0	0	0	0	0	0	0	0	0	0
A0A287JE54	Carboxypeptidase OS=Hordeum vulgare subsp. vulgare OX=112509 PE=3 SV=1	High																							A0A287JE54	0	0	0	0	0	0	0	0	0	0	0	0	0	0	0	0	0	0	0	0	0	0	0	0
A0A287M419	C3H1-type domain-containing protein OS=Hordeum vulgare subsp. vulgare OX=112509 PE=4 SV=1	High																							A0A287M419	0	0	0	0	0	0	0	0	0	0	0	0	0	0	0	0	0	0	0	0	0	0	0	0
A0A287PQS8	Proteasome subunit alpha type OS=Hordeum vulgare subsp. vulgare OX=112509 PE=3 SV=1	High																							A0A287PQS8	0	0	0	0	0	0	0	0	0	0	0	0	0	0	0	0	0	0	0	0	0	0	0	0
A0A287G6V6	Peptidylprolyl isomerase OS=Hordeum vulgare subsp. vulgare OX=112509 PE=4 SV=1	High					-0.181956	-0.208885	-0.463035	0.0670291	0.149572	-0.0199822	-0.140849	0.0318742	-0.351508	0.25153	0.349049	-0.0132228	-1.54404	-0.480576	-0.0874389	-0.35482	-0.165737	-0.32863	A0A287G6V6	0	0	0	0	0	0	0	0	0	0	0	0	0	0	0	0	0	0	0	0	0	0	0	0
A0A287F6R7	Uncharacterized protein OS=Hordeum vulgare subsp. vulgare OX=112509 PE=3 SV=1	High					-0.650185	0.475243	1.01728	0.0562037		-1.36059	-0.13157	0.257517	0.0907275	-1.21082	-0.15084	0.148666	0.0686499	0.336624	-0.492646	0.402973	0.650766		A0A287F6R7	0	0	0	0	0	0	0	0	0	0	0	0	0	0	0	0	0	0	0	0	0	0	0	0
F2DGK4	Predicted protein OS=Hordeum vulgare subsp. vulgare OX=112509 PE=2 SV=1	High			catalytic activity	Pf05691																			F2DGK4	0	0	0	0	0	0	0	0	0	0	0	0	0	0	0	0	0	0	0	0	0	0	0	0
M0Y6T6	Uncharacterized protein OS=Hordeum vulgare subsp. vulgare OX=112509 PE=4 SV=1	High																							M0Y6T6	0	0	0	0	0	0	0	0	0	0	0	0	0	0	0	0	0	0	0	0	0	0	0	0
A0A287LID5	Uncharacterized protein OS=Hordeum vulgare subsp. vulgare OX=112509 PE=4 SV=1	High					-0.0674384	0.743402	-0.324852	0.755449	1.11372	0.689949	0.380101	0.61283	0.401911	0.44104	0.907126	0.499862				0.0325495	-0.85578		A0A287LID5	0	0	0	0	0	0	0	0	0	0	0	0	0	0	0	0	0	0	0	0	0	0	0	0
A0A287TUD5	Uncharacterized protein OS=Hordeum vulgare subsp. vulgare OX=112509 PE=4 SV=1	High																							A0A287TUD5	0	0	0	0	0	0	0	0	0	0	0	0	0	0	0	0	0	0	0	0	0	0	0	0
A0A287HLF1	Sm domain-containing protein OS=Hordeum vulgare subsp. vulgare OX=112509 PE=4 SV=1	High																							A0A287HLF1	0	0	0	0	0	0	0	0	0	0	0	0	0	0	0	0	0	0	0	0	0	0	0	0
F2EKQ3	Predicted protein OS=Hordeum vulgare subsp. vulgare OX=112509 PE=2 SV=1	High																							F2EKQ3	0	0	0	0	0	0	0	0	0	0	0	0	0	0	0	0	0	0	0	0	0	0	0	0
F2CSN3	Predicted protein (Fragment) OS=Hordeum vulgare subsp. vulgare OX=112509 PE=2 SV=1	High	metabolic process		catalytic activity	Pf00106,Pf01073,Pf01370,Pf02719,Pf03435,Pf04321,Pf05368,Pf07993,Pf13460																			F2CSN3	0	0	0	0	0	0	0	0	0	0	0	0	0	0	0	0	0	0	0	0	0	0	0	0
F2DCF9	Predicted protein OS=Hordeum vulgare subsp. vulgare OX=112509 PE=2 SV=1	High																							F2DCF9	0	0	0	0	0	0	0	0	0	0	0	0	0	0	0	0	0	0	0	0	0	0	0	0
A0A287I5J7	Reticulon-like protein OS=Hordeum vulgare subsp. vulgare OX=112509 PE=4 SV=1	High																							A0A287I5J7	0	0	0	0	0	0	0	0	0	0	0	0	0	0	0	0	0	0	0	0	0	0	0	0
A0A287V984	Peptidase_M3 domain-containing protein OS=Hordeum vulgare subsp. vulgare OX=112509 PE=3 SV=1	High																							A0A287V984	0	0	0	0	0	0	0	0	0	0	0	0	0	0	0	0	0	0	0	0	0	0	0	0
F2E6L9	Predicted protein OS=Hordeum vulgare subsp. vulgare OX=112509 PE=2 SV=1	High			RNA binding	Pf00013,Pf13014																			F2E6L9	0	0	0	0	0	0	0	0	0	0	0	0	0	0	0	0	0	0	0	0	0	0	0	0
A0A287MCN0	Uncharacterized protein OS=Hordeum vulgare subsp. vulgare OX=112509 PE=4 SV=1	High																							A0A287MCN0	0	0	0	0	0	0	0	0	0	0	0	0	0	0	0	0	0	0	0	0	0	0	0	0
A0A287R9G7	TPT domain-containing protein OS=Hordeum vulgare subsp. vulgare OX=112509 PE=4 SV=1	High																							A0A287R9G7	0	0	0	0	0	0	0	0	0	0	0	0	0	0	0	0	0	0	0	0	0	0	0	0
A0A287XVR8	Uncharacterized protein OS=Hordeum vulgare subsp. vulgare OX=112509 PE=4 SV=1	High																							A0A287XVR8	0	0	0	0	0	0	0	0	0	0	0	0	0	0	0	0	0	0	0	0	0	0	0	0
A0A287JZA4	Uncharacterized protein OS=Hordeum vulgare subsp. vulgare OX=112509 PE=4 SV=1	High					0.210639	0.343607	-0.0155295	0.348914	0.303579	0.7587	0.267757	0.564795	0.201721	-0.077273	0.545646	-0.175906	0.717421	0.385523	0.28665	-0.042508	0.0673696	0.173932	A0A287JZA4	0	0	0	0	0	0	0	0	0	0	0	0	0	0	0	0	0	0	0	0	0	0	0	0
A0A287FJQ9	ATP-dependent Clp protease proteolytic subunit OS=Hordeum vulgare subsp. vulgare OX=112509 PE=3 SV=1	High																							A0A287FJQ9	0	0	0	0	0	0	0	0	0	0	0	0	0	0	0	0	0	0	0	0	0	0	0	0
F2DM81	Predicted protein (Fragment) OS=Hordeum vulgare subsp. vulgare OX=112509 PE=2 SV=1	High	regulation of biological process		enzyme regulator activity;metal ion binding	Pf01412	0.397815	-0.12477	-0.411471	0.673892	0.708304	0.340774	0.709682	1.10766	0.225198	1.21329	0.604444	0.900612		0.482002	0.61548	-0.303441	-0.186572	1.0256	F2DM81	0	0	0	0	0	0	0	0	0	0	0	0	0	0	0	0	0	0	0	0	0	0	0	0
A0A287LJL2	SpoU_sub_bind domain-containing protein OS=Hordeum vulgare subsp. vulgare OX=112509 PE=4 SV=1	High																							A0A287LJL2	0	0	0	0	0	0	0	0	0	0	0	0	0	0	0	0	0	0	0	0	0	0	0	0
A0A287M563	Uncharacterized protein OS=Hordeum vulgare subsp. vulgare OX=112509 PE=4 SV=1	High					-0.954529	-0.568687	-0.0445406	0.250589	-0.274724	0.105204	0.470501	1.10248	-0.297031	-0.641688	0.340249	-0.485494	-1.03368		0.444079	-1.79486	0.359994	-1.73499	A0A287M563	0	0	0	0	0	0	0	0	0	0	0	0	0	0	0	-1	0	-1	2	0	0	2	1	0
F2CU40	Photosystem II reaction center Psb28 protein OS=Hordeum vulgare subsp. vulgare OX=112509 PE=2 SV=1	High	metabolic process	membrane		Pf03912	0.171239	0.0863546	0.976954	0.131733	0.195755	0.213452	-0.0185472	-0.665142	0.0943059	0.0264539	0.126474	0.0979374	0.431199	0.968698	0.776962				F2CU40	0	0	0	0	0	0	0	0	0	0	0	0	0	0	0	0	0	0	0	0	0	0	0	0
F2D0E8	Predicted protein OS=Hordeum vulgare subsp. vulgare OX=112509 PE=2 SV=1	High																							F2D0E8	0	0	0	0	0	0	0	0	0	0	0	0	0	0	0	0	0	0	0	0	0	0	0	0
A0A287NQ27	Hflx-type G domain-containing protein OS=Hordeum vulgare subsp. vulgare OX=112509 PE=4 SV=1	High																							A0A287NQ27	0	0	0	0	0	0	0	0	0	0	0	0	0	0	0	0	0	0	0	0	0	0	0	0
F2EBG8	Predicted protein OS=Hordeum vulgare subsp. vulgare OX=112509 PE=2 SV=1	High	metabolic process;response to stimulus	nucleus	DNA binding;protein binding	Pf00240,Pf00627,Pf09280,Pf11976																			F2EBG8	0	0	0	0	0	0	0	0	0	0	0	0	0	0	0	0	0	0	0	0	0	0	0	0
F2D4X1	Predicted protein OS=Hordeum vulgare subsp. vulgare OX=112509 PE=2 SV=1	High					0.697489	0.478783	0.199304	-0.158042	0.0432783	0.0563553	0.429465	0.532399	0.294821	-0.417471	-0.396609	-0.068701	-0.601697	-0.157173	-0.415139	-0.530699	-0.558324	-0.212171	F2D4X1	0	0	0	0	0	0	0	0	0	0	0	0	0	0	0	0	0	0	0	0	0	0	0	0
F2CT66	Predicted protein OS=Hordeum vulgare subsp. vulgare OX=112509 PE=2 SV=1	High				Pf04427																			F2CT66	0	0	0	0	0	0	0	0	0	0	0	0	0	0	0	0	0	0	0	0	0	0	0	0
A0A287KBD3	Translation machinery-associated protein 22 OS=Hordeum vulgare subsp. vulgare OX=112509 PE=3 SV=1	High																							A0A287KBD3	0	0	0	0	0	0	0	0	0	0	0	0	0	0	0	0	0	0	0	0	0	0	0	0
A0A287PCS7	SMAP domain-containing protein OS=Hordeum vulgare subsp. vulgare OX=112509 PE=4 SV=1	High																							A0A287PCS7	0	0	0	0	0	0	0	0	0	0	0	0	0	0	0	0	0	0	0	0	0	0	0	0
A0A287K8Y8	Uncharacterized protein OS=Hordeum vulgare subsp. vulgare OX=112509 PE=4 SV=1	High																							A0A287K8Y8	0	0	0	0	0	0	0	0	0	0	0	0	0	0	0	0	0	0	0	0	0	0	0	0
A0A287NL38	Uncharacterized protein OS=Hordeum vulgare subsp. vulgare OX=112509 PE=4 SV=1	High																							A0A287NL38	0	0	0	0	0	0	0	0	0	0	0	0	0	0	0	0	0	0	0	0	0	0	0	0
F2DB27	Predicted protein OS=Hordeum vulgare subsp. vulgare OX=112509 PE=2 SV=1	High			catalytic activity	Pf01370	-0.137764	0.60146	0.0499373		0.46905		0.0356785	-0.0478837	-0.2992	-0.10228	0.736101		1.04654	0.457804	0.681481	0.406772	0.504535	-0.59901	F2DB27	0	0	0	0	0	0	0	0	0	0	0	0	0	0	0	0	0	0	0	0	0	0	0	0
F2DBY5	Predicted protein OS=Hordeum vulgare subsp. vulgare OX=112509 PE=2 SV=1	High			metal ion binding;protein binding	Pf00097,Pf00642,Pf13445,Pf13639,Pf13920,Pf13923,Pf14634																			F2DBY5	0	0	0	0	0	0	0	0	0	0	0	0	0	0	0	0	0	0	0	0	0	0	0	0
A0A287GSR0	Uncharacterized protein OS=Hordeum vulgare subsp. vulgare OX=112509 PE=4 SV=1	High																							A0A287GSR0	0	0	0	0	0	0	0	0	0	0	0	0	0	0	0	0	0	0	0	0	0	0	0	0
F2E1N0	Predicted protein (Fragment) OS=Hordeum vulgare subsp. vulgare OX=112509 PE=2 SV=1	High	metabolic process		catalytic activity	Pf01408																			F2E1N0	0	0	0	0	0	0	0	0	0	0	0	0	0	0	0	0	0	0	0	0	0	0	0	0
A0A287H0D7	Uncharacterized protein OS=Hordeum vulgare subsp. vulgare OX=112509 PE=4 SV=1	High																							A0A287H0D7	0	0	0	0	0	0	0	0	0	0	0	0	0	0	0	0	0	0	0	0	0	0	0	0
M0WIE0	Nucleolar GTP-binding protein 1 OS=Hordeum vulgare subsp. vulgare OX=112509 PE=3 SV=1	High		nucleus	nucleotide binding	Pf00009,Pf01926,Pf02421,Pf06858,Pf08155																			M0WIE0	0	0	0	0	0	0	0	0	0	0	0	0	0	0	0	0	0	0	0	0	0	0	0	0
F2CSK8	Predicted protein OS=Hordeum vulgare subsp. vulgare OX=112509 PE=2 SV=1	High	metabolic process	membrane	catalytic activity	Pf01764																			F2CSK8	0	0	0	0	0	0	0	0	0	0	0	0	0	0	0	0	0	0	0	0	0	0	0	0
A0A287T1T5	Uncharacterized protein OS=Hordeum vulgare subsp. vulgare OX=112509 PE=4 SV=1	High																							A0A287T1T5	0	0	0	0	0	0	0	0	0	0	0	0	0	0	0	0	0	0	0	0	0	0	0	0
S4Z279	Uncharacterized protein OS=Hordeum vulgare subsp. spontaneum OX=77009 GN=orf188 PE=3 SV=1	High	metabolic process	membrane	catalytic activity	Pf00146																			S4Z279	0	0	0	0	0	0	0	0	0	0	0	0	0	0	0	0	0	0	0	0	0	0	0	0
A0A287I8I7	Uncharacterized protein OS=Hordeum vulgare subsp. vulgare OX=112509 PE=4 SV=1	High																							A0A287I8I7	0	0	0	0	0	0	0	0	0	0	0	0	0	0	0	0	0	0	0	0	0	0	0	0
F2E2A1	Predicted protein OS=Hordeum vulgare subsp. vulgare OX=112509 PE=2 SV=1	High				Pf08609																			F2E2A1	0	0	0	0	0	0	0	0	0	0	0	0	0	0	0	0	0	0	0	0	0	0	0	0
A0A287PTD2	CitMHS domain-containing protein OS=Hordeum vulgare subsp. vulgare OX=112509 PE=4 SV=1	High																							A0A287PTD2	0	0	0	0	0	0	0	0	0	0	0	0	0	0	0	0	0	0	0	0	0	0	0	0
A0A287UJS8	Uncharacterized protein OS=Hordeum vulgare subsp. vulgare OX=112509 PE=3 SV=1	High																							A0A287UJS8	0	0	0	0	0	0	0	0	0	0	0	0	0	0	0	0	0	0	0	0	0	0	0	0
A0A287X535	BZIP domain-containing protein OS=Hordeum vulgare subsp. vulgare OX=112509 PE=4 SV=1	High																							A0A287X535	0	0	0	0	0	0	0	0	0	0	0	0	0	0	0	0	0	0	0	0	0	0	0	0
A0A287RXR1	Epimerase domain-containing protein OS=Hordeum vulgare subsp. vulgare OX=112509 PE=4 SV=1	High																							A0A287RXR1	0	0	0	0	0	0	0	0	0	0	0	0	0	0	0	0	0	0	0	0	0	0	0	0
A0A287TJI3	Uncharacterized protein OS=Hordeum vulgare subsp. vulgare OX=112509 PE=4 SV=1	High																							A0A287TJI3	0	0	0	0	0	0	0	0	0	0	0	0	0	0	0	0	0	0	0	0	0	0	0	0
F2CVJ6	Predicted protein OS=Hordeum vulgare subsp. vulgare OX=112509 PE=2 SV=1	High				Pf05498,Pf12046																			F2CVJ6	0	0	0	0	0	0	0	0	0	0	0	0	0	0	0	0	0	0	0	0	0	0	0	0
A0A287EI86	Uncharacterized protein OS=Hordeum vulgare subsp. vulgare OX=112509 PE=4 SV=1	High																							A0A287EI86	0	0	0	0	0	0	0	0	0	0	0	0	0	0	0	0	0	0	0	0	0	0	0	0
F2DV69	Predicted protein OS=Hordeum vulgare subsp. vulgare OX=112509 PE=2 SV=1	High	transport		protein binding	Pf14938																			F2DV69	0	0	0	0	0	0	0	0	0	0	0	0	0	0	0	0	0	0	0	0	0	0	0	0
A0A287EXP7	Uncharacterized protein OS=Hordeum vulgare subsp. vulgare OX=112509 PE=4 SV=1	High					0.0333451	0.722624	-0.203683	1.14997	1.02803	1.47651	0.548945	1.53177	0.832772	0.171675	0.152139	1.07605				-0.056126	-0.334266	0.520139	A0A287EXP7	0	0	0	0	0	0	0	1	0	0	0	0	0	0	0	0	0	0	1	0	1	0	0	1
A0A287SM54	Uncharacterized protein OS=Hordeum vulgare subsp. vulgare OX=112509 PE=4 SV=1	High																							A0A287SM54	0	0	0	0	0	0	0	0	0	0	0	0	0	0	0	0	0	0	0	0	0	0	0	0
A0A287MF41	Uncharacterized protein OS=Hordeum vulgare subsp. vulgare OX=112509 PE=4 SV=1	High																							A0A287MF41	0	0	0	0	0	0	0	0	0	0	0	0	0	0	0	0	0	0	0	0	0	0	0	0
A0A287R039	Uncharacterized protein OS=Hordeum vulgare subsp. vulgare OX=112509 PE=4 SV=1	High					-0.828059	-0.902406	-0.593274	0.446629	-0.488496	0.0813372	-0.648309	-0.365397	-1.0153	-0.114467	-0.865179	-0.651258	-0.886714	-0.711171	0.452532	-0.716252	-0.738896	-0.944859	A0A287R039	0	0	0	0	0	0	0	0	0	0	0	0	0	0	0	0	0	0	0	0	0	0	0	0
A0A287S986	Serine/threonine-protein phosphatase OS=Hordeum vulgare subsp. vulgare OX=112509 PE=3 SV=1	High																							A0A287S986	0	0	0	0	0	0	0	0	0	0	0	0	0	0	0	0	0	0	0	0	0	0	0	0
F2DFG2	Predicted protein OS=Hordeum vulgare subsp. vulgare OX=112509 PE=2 SV=1	High	cell organization and biogenesis	chromosome;nucleus	DNA binding	Pf00538	-0.133626	-0.166438	0.0472726	-0.0935307	0.112568	0.432304	-0.335994	-0.239484	-0.0749754	-0.0864333	0.231473	0.329644				-0.376955		-0.48138	F2DFG2	0	0	0	0	0	0	0	0	0	0	0	0	0	0	0	0	0	0	0	0	0	0	0	0
A0A287MBK1	Uncharacterized protein OS=Hordeum vulgare subsp. vulgare OX=112509 PE=4 SV=1	High																							A0A287MBK1	0	0	0	0	0	0	0	0	0	0	0	0	0	0	0	0	0	0	0	0	0	0	0	0
A0A287RP18	Glucose-6-phosphate isomerase OS=Hordeum vulgare subsp. vulgare OX=112509 PE=3 SV=1	High																							A0A287RP18	0	0	0	0	0	0	0	0	0	0	0	0	0	0	0	0	0	0	0	0	0	0	0	0
F2EGE2	Predicted protein OS=Hordeum vulgare subsp. vulgare OX=112509 PE=2 SV=1	High	metabolic process			Pf00111	0.30364	0.581439	0.902515	0.0366001	-0.227057	-0.296661	-0.0773256	0.108007	0.363356	-0.172031	-0.226124	0.0401119	-1.18632	-0.22116	-0.304217	-0.500962	-0.495076	-0.440703	F2EGE2	0	0	0	0	0	0	0	0	0	0	0	0	0	0	0	0	0	0	0	0	0	0	0	0
F2DI15	Probable alanine--tRNA ligase, chloroplastic OS=Hordeum vulgare subsp. vulgare OX=112509 PE=2 SV=1	High	metabolic process	cytoplasm;mitochondrion	catalytic activity;metal ion binding;nucleotide binding;RNA binding	Pf01411,Pf07973																			F2DI15	0	0	0	0	0	0	0	0	0	0	0	0	0	0	0	0	0	0	0	0	0	0	0	0
A0A287LLU1	DUF1421 domain-containing protein OS=Hordeum vulgare subsp. vulgare OX=112509 PE=4 SV=1	High																							A0A287LLU1	0	0	0	0	0	0	0	0	0	0	0	0	0	0	0	0	0	0	0	0	0	0	0	0
A0A287R9E9	Uncharacterized protein OS=Hordeum vulgare subsp. vulgare OX=112509 PE=4 SV=1	High																							A0A287R9E9	0	0	0	0	0	0	0	0	0	0	0	0	0	0	0	0	0	0	0	0	0	0	0	0
A0A287Q3I3	AP-2 complex subunit alpha OS=Hordeum vulgare subsp. vulgare OX=112509 PE=4 SV=1	High																							A0A287Q3I3	0	0	0	0	0	0	0	0	0	0	0	0	0	0	0	0	0	0	0	0	0	0	0	0
F2DLQ1	Predicted protein OS=Hordeum vulgare subsp. vulgare OX=112509 PE=2 SV=1	High			RNA binding	Pf00076,Pf13893,Pf14259	-0.580126	-0.155814	1.08768	-1.28709	-0.695498	-0.422774	-0.426358	-0.570186	-0.0745134	-1.28182	-0.85769	-0.887404	1.38906	0.631918	-2.06035	0.573278	1.02143	-1.447	F2DLQ1	0	0	0	0	0	0	0	0	0	0	0	0	0	0	-1	0	0	0	1	0	0	1	0	0
F2EAU2	Predicted protein OS=Hordeum vulgare subsp. vulgare OX=112509 PE=2 SV=1	High	regulation of biological process;response to stimulus		catalytic activity;nucleotide binding	Pf00009,Pf00025,Pf00071,Pf01926,Pf08477																			F2EAU2	0	0	0	0	0	0	0	0	0	0	0	0	0	0	0	0	0	0	0	0	0	0	0	0
M0YJS4	Uncharacterized protein OS=Hordeum vulgare subsp. vulgare OX=112509 PE=4 SV=1	High	metabolic process			Pf05347,Pf13232																			M0YJS4	0	0	0	0	0	0	0	0	0	0	0	0	0	0	0	0	0	0	0	0	0	0	0	0
A0A287WN95	Uncharacterized protein OS=Hordeum vulgare subsp. vulgare OX=112509 PE=4 SV=1	High					-0.3343	0.449925	0.232757	0.775778	0.268116	-0.816417	1.30353	1.19462	0.998411	1.41201	1.18386	0.572908	0.387349	-0.421257	-0.42918	1.75534	1.53357	1.85818	A0A287WN95	0	0	0	0	0	0	0	0	0	0	0	0	0	0	0	1	1	1	3	0	0	3	1	1
F2EAF6	Predicted protein OS=Hordeum vulgare subsp. vulgare OX=112509 PE=2 SV=1	High	defense response;response to stimulus			Pf00967																			F2EAF6	0	0	0	0	0	0	0	0	0	0	0	0	0	0	0	0	0	0	0	0	0	0	0	0
M0YJU4	Uncharacterized protein OS=Hordeum vulgare subsp. vulgare OX=112509 PE=3 SV=1	High	metabolic process		catalytic activity;nucleotide binding	Pf00441,Pf02770,Pf02771,Pf08028																			M0YJU4	0	0	0	0	0	0	0	0	0	0	0	0	0	0	0	0	0	0	0	0	0	0	0	0
F2CYI2	Predicted protein OS=Hordeum vulgare subsp. vulgare OX=112509 PE=2 SV=1	High	defense response;response to stimulus			Pf00407																			F2CYI2	0	0	0	0	0	0	0	0	0	0	0	0	0	0	0	0	0	0	0	0	0	0	0	0
F2CV17	Protein transport protein Sec61 subunit beta OS=Hordeum vulgare subsp. vulgare OX=112509 PE=2 SV=1	High	transport	endoplasmic reticulum;membrane		Pf03911																			F2CV17	0	0	0	0	0	0	0	0	0	0	0	0	0	0	0	0	0	0	0	0	0	0	0	0
F2DTJ3	Predicted protein OS=Hordeum vulgare subsp. vulgare OX=112509 PE=2 SV=1	High			protein binding	Pf05773																			F2DTJ3	0	0	0	0	0	0	0	0	0	0	0	0	0	0	0	0	0	0	0	0	0	0	0	0
A0A287RRS2	Eukaryotic translation initiation factor 3 subunit E OS=Hordeum vulgare subsp. vulgare OX=112509 PE=3 SV=1	High																							A0A287RRS2	0	0	0	0	0	0	0	0	0	0	0	0	0	0	0	0	0	0	0	0	0	0	0	0
F2DE08	Predicted protein (Fragment) OS=Hordeum vulgare subsp. vulgare OX=112509 PE=2 SV=1	High	metabolic process			Pf00694																			F2DE08	0	0	0	0	0	0	0	0	0	0	0	0	0	0	0	0	0	0	0	0	0	0	0	0
F2DVV7	Probable 6-phosphogluconolactonase OS=Hordeum vulgare subsp. vulgare OX=112509 PE=2 SV=1	High	metabolic process		catalytic activity	Pf01182																			F2DVV7	0	0	0	0	0	0	0	0	0	0	0	0	0	0	0	0	0	0	0	0	0	0	0	0
M0XCY5	Uncharacterized protein OS=Hordeum vulgare subsp. vulgare OX=112509 PE=4 SV=1	High	metabolic process		catalytic activity	Pf00703,Pf02836,Pf02837																			M0XCY5	0	0	0	0	0	0	0	0	0	0	0	0	0	0	0	0	0	0	0	0	0	0	0	0
A0A287TAL1	Uncharacterized protein OS=Hordeum vulgare subsp. vulgare OX=112509 PE=3 SV=1	High					-0.368871	-0.584439	-0.152431	1.28138	1.24658	1.40165	-0.0669466	0.517886	-0.496544	-0.234398	0.250752	-0.677592	0.0542247	-0.195902	0.409555	-0.123038	0.0858403	-0.922329	A0A287TAL1	0	0	0	0	0	0	0	0	0	0	0	0	0	0	0	0	0	0	0	0	0	0	0	0
A0A287FAP7	Uncharacterized protein OS=Hordeum vulgare subsp. vulgare OX=112509 PE=4 SV=1	High																							A0A287FAP7	0	0	0	0	0	0	0	0	0	0	0	0	0	0	0	0	0	0	0	0	0	0	0	0
M0WEH7	Uncharacterized protein OS=Hordeum vulgare subsp. vulgare OX=112509 PE=4 SV=1	High				Pf09713																			M0WEH7	0	0	0	0	0	0	0	0	0	0	0	0	0	0	0	0	0	0	0	0	0	0	0	0
F2D039	Predicted protein (Fragment) OS=Hordeum vulgare subsp. vulgare OX=112509 PE=2 SV=1	High		mitochondrion	catalytic activity;transporter activity	Pf02297																			F2D039	0	0	0	0	0	0	0	0	0	0	0	0	0	0	0	0	0	0	0	0	0	0	0	0
A0A287E422	ArsA_ATPase domain-containing protein OS=Hordeum vulgare subsp. vulgare OX=112509 PE=4 SV=1	High																							A0A287E422	0	0	0	0	0	0	0	0	0	0	0	0	0	0	0	0	0	0	0	0	0	0	0	0
M0VN35	Uncharacterized protein OS=Hordeum vulgare subsp. vulgare OX=112509 PE=4 SV=1	High	metabolic process	membrane	catalytic activity	Pf00201,Pf03033																			M0VN35	0	0	0	0	0	0	0	0	0	0	0	0	0	0	0	0	0	0	0	0	0	0	0	0
A0A287I1Z8	Uncharacterized protein OS=Hordeum vulgare subsp. vulgare OX=112509 PE=4 SV=1	High																							A0A287I1Z8	0	0	0	0	0	0	0	0	0	0	0	0	0	0	0	0	0	0	0	0	0	0	0	0
A0A287HAK5	Nop domain-containing protein OS=Hordeum vulgare subsp. vulgare OX=112509 PE=4 SV=1	High																							A0A287HAK5	0	0	0	0	0	0	0	0	0	0	0	0	0	0	0	0	0	0	0	0	0	0	0	0
F2CRK6	Predicted protein OS=Hordeum vulgare subsp. vulgare OX=112509 PE=2 SV=1	High	transport	Golgi;membrane;vacuole	catalytic activity;transporter activity	Pf01813																			F2CRK6	0	0	0	0	0	0	0	0	0	0	0	0	0	0	0	0	0	0	0	0	0	0	0	0
A0A287KAY6	Uncharacterized protein OS=Hordeum vulgare subsp. vulgare OX=112509 PE=4 SV=1	High																							A0A287KAY6	0	0	0	0	0	0	0	0	0	0	0	0	0	0	0	0	0	0	0	0	0	0	0	0
A0A287LSG1	Flavodoxin-like domain-containing protein OS=Hordeum vulgare subsp. vulgare OX=112509 PE=4 SV=1	High					-0.0483953	1.45896	1.35308	0.857571	0.403975	0.269142	-0.360202	0.311196	-0.213847	0.111092	-0.207162	0.123335							A0A287LSG1	0	0	0	0	0	0	0	0	0	0	0	0	0	0	0	0	0	0	0	0	0	0	0	0
A0A287GKL8	Uncharacterized protein OS=Hordeum vulgare subsp. vulgare OX=112509 PE=4 SV=1	High																							A0A287GKL8	0	0	0	0	0	0	0	0	0	0	0	0	0	0	0	0	0	0	0	0	0	0	0	0
F2E4E2	Predicted protein OS=Hordeum vulgare subsp. vulgare OX=112509 PE=2 SV=1	High	metabolic process		RNA binding	Pf06273																			F2E4E2	0	0	0	0	0	0	0	0	0	0	0	0	0	0	0	0	0	0	0	0	0	0	0	0
F2E6V2	Predicted protein OS=Hordeum vulgare subsp. vulgare OX=112509 PE=2 SV=1	High	metabolic process		catalytic activity	Pf00112,Pf00396,Pf08246																			F2E6V2	0	0	0	0	0	0	0	0	0	0	0	0	0	0	0	0	0	0	0	0	0	0	0	0
A0A287SLP6	SCP domain-containing protein OS=Hordeum vulgare subsp. vulgare OX=112509 PE=3 SV=1	High																							A0A287SLP6	0	0	0	0	0	0	0	0	0	0	0	0	0	0	0	0	0	0	0	0	0	0	0	0
C7BWK4	Eukaryotic translation initiation factor 4E OS=Hordeum vulgare OX=4513 GN=eIF4E PE=2 SV=2	High	metabolic process	cytoplasm	RNA binding	Pf01652																			C7BWK4	0	0	0	0	0	0	0	0	0	0	0	0	0	0	0	0	0	0	0	0	0	0	0	0
A0A287PA87	RRM domain-containing protein OS=Hordeum vulgare subsp. vulgare OX=112509 PE=4 SV=1	High																							A0A287PA87	0	0	0	0	0	0	0	0	0	0	0	0	0	0	0	0	0	0	0	0	0	0	0	0
A0A287MWN8	Ribosomal protein OS=Hordeum vulgare subsp. vulgare OX=112509 PE=3 SV=1	High																							A0A287MWN8	0	0	0	0	0	0	0	0	0	0	0	0	0	0	0	0	0	0	0	0	0	0	0	0
F2DD06	Predicted protein OS=Hordeum vulgare subsp. vulgare OX=112509 PE=2 SV=1	High				Pf09713																			F2DD06	0	0	0	0	0	0	0	0	0	0	0	0	0	0	0	0	0	0	0	0	0	0	0	0
A0A287F7H0	Uncharacterized protein OS=Hordeum vulgare subsp. vulgare OX=112509 PE=4 SV=1	High																							A0A287F7H0	0	0	0	0	0	0	0	0	0	0	0	0	0	0	0	0	0	0	0	0	0	0	0	0
F2DTN3	Predicted protein OS=Hordeum vulgare subsp. vulgare OX=112509 PE=2 SV=1	High	transport	membrane	transporter activity	Pf00230																			F2DTN3	0	0	0	0	0	0	0	0	0	0	0	0	0	0	0	0	0	0	0	0	0	0	0	0
A0A287MX61	Uncharacterized protein OS=Hordeum vulgare subsp. vulgare OX=112509 PE=4 SV=1	High																							A0A287MX61	0	0	0	0	0	0	0	0	0	0	0	0	0	0	0	0	0	0	0	0	0	0	0	0
A1EA33	ATP-dependent Clp protease proteolytic subunit OS=Agrostis stolonifera OX=63632 GN=clpP PE=3 SV=1	High	metabolic process		catalytic activity	Pf00574																			A1EA33	0	0	0	0	0	0	0	0	0	0	0	0	0	0	0	0	0	0	0	0	0	0	0	0
F2CQL1	Predicted protein OS=Hordeum vulgare subsp. vulgare OX=112509 PE=2 SV=1	High																							F2CQL1	0	0	0	0	0	0	0	0	0	0	0	0	0	0	0	0	0	0	0	0	0	0	0	0
F2D604	Predicted protein OS=Hordeum vulgare subsp. vulgare OX=112509 PE=2 SV=1	High	metabolic process	spliceosomal complex	RNA binding	Pf00076,Pf13893,Pf14259,Pf14605																			F2D604	0	0	0	0	0	0	0	0	0	0	0	0	0	0	0	0	0	0	0	0	0	0	0	0
A0A287NRF0	Uncharacterized protein OS=Hordeum vulgare subsp. vulgare OX=112509 PE=4 SV=1	High																							A0A287NRF0	0	0	0	0	0	0	0	0	0	0	0	0	0	0	0	0	0	0	0	0	0	0	0	0
F2DMU9	Predicted protein OS=Hordeum vulgare subsp. vulgare OX=112509 PE=2 SV=1	High																							F2DMU9	0	0	0	0	0	0	0	0	0	0	0	0	0	0	0	0	0	0	0	0	0	0	0	0
A0A287P4F0	PKS_AT domain-containing protein OS=Hordeum vulgare subsp. vulgare OX=112509 PE=4 SV=1	High																							A0A287P4F0	0	0	0	0	0	0	0	0	0	0	0	0	0	0	0	0	0	0	0	0	0	0	0	0
A0A287M736	Rad21_Rec8 domain-containing protein OS=Hordeum vulgare subsp. vulgare OX=112509 PE=4 SV=1	High																							A0A287M736	0	0	0	0	0	0	0	0	0	0	0	0	0	0	0	0	0	0	0	0	0	0	0	0
F2DH88	Predicted protein OS=Hordeum vulgare subsp. vulgare OX=112509 PE=2 SV=1	High				Pf02847																			F2DH88	0	0	0	0	0	0	0	0	0	0	0	0	0	0	0	0	0	0	0	0	0	0	0	0
A0A287IRL3	Uncharacterized protein OS=Hordeum vulgare subsp. vulgare OX=112509 PE=4 SV=1	High																							A0A287IRL3	0	0	0	0	0	0	0	0	0	0	0	0	0	0	0	0	0	0	0	0	0	0	0	0
A0A287R6Y3	TPR_REGION domain-containing protein OS=Hordeum vulgare subsp. vulgare OX=112509 PE=4 SV=1	High					-0.898368	0.202958	-0.359049	0.422403	0.231003	0.58182	-0.418062	0.144233	-0.694164	0.467486	0.203404	0.0945484	0.208205	0.152851	-0.53807	-0.470986	0.223456	-1.08595	A0A287R6Y3	0	0	0	0	0	0	0	0	0	0	0	0	0	0	0	0	0	0	0	0	0	0	0	0
F2CQU9	Predicted protein OS=Hordeum vulgare subsp. vulgare OX=112509 PE=2 SV=1	High				Pf05627	-0.131222	0.138473	0.378575	-0.238205	-0.139231	-0.753012	-0.034019	0.214977	-0.199363	0.684265	-0.109826	-0.613379	-0.106979	-0.426674	-0.165712	-0.259435	-0.149111	0.395917	F2CQU9	0	0	0	0	0	0	0	0	0	0	0	0	0	0	0	0	0	0	0	0	0	0	0	0
F2D2H6	Alpha-glucosidase OS=Hordeum vulgare subsp. vulgare OX=112509 PE=2 SV=1	High	metabolic process		catalytic activity	Pf01055,Pf13802	0.0707696	0.330039	-0.490243	0.830917	1.14022	1.58933	0.279387	0.448356	-0.157355	0.873933	0.269798	1.09308	0.104042		-0.453836	0.192867	0.695882	1.44959	F2D2H6	0	0	0	0	0	1	0	0	0	0	0	0	0	0	0	0	0	0	1	1	0	0	0	0
A0A287GP25	CBFD_NFYB_HMF domain-containing protein OS=Hordeum vulgare subsp. vulgare OX=112509 PE=4 SV=1	High																							A0A287GP25	0	0	0	0	0	0	0	0	0	0	0	0	0	0	0	0	0	0	0	0	0	0	0	0
A0A287V5C3	Uncharacterized protein OS=Hordeum vulgare subsp. vulgare OX=112509 PE=4 SV=1	High																							A0A287V5C3	0	0	0	0	0	0	0	0	0	0	0	0	0	0	0	0	0	0	0	0	0	0	0	0
F2D0C8	Predicted protein OS=Hordeum vulgare subsp. vulgare OX=112509 PE=2 SV=1	High	metabolic process			Pf00111	0.0874666	-0.00869113	0.101497	-0.310363	0.601901	0.0542622	-0.351338	-0.224505	-0.234297	-0.719749	-0.285777	-0.382759	-0.100264	0.607369	-0.0932711	-0.111693	-0.565958	0.529109	F2D0C8	0	0	0	0	0	0	0	0	0	0	0	0	0	0	0	0	0	0	0	0	0	0	0	0
A0A287T3N5	Protein kinase domain-containing protein OS=Hordeum vulgare subsp. vulgare OX=112509 PE=4 SV=1	High					-0.0598171	0.0799943	0.525819	1.72926	0.642523	0.659525	0.543313	-0.365382	1.19289	1.34108	0.997262	1.23386	0.412545	0.150835	0.38277				A0A287T3N5	0	0	0	1	0	0	0	0	0	0	0	0	0	0	0	0	0	0	1	1	0	0	1	0
A0A287DTY5	Uncharacterized protein OS=Hordeum vulgare subsp. vulgare OX=112509 PE=4 SV=1	High																							A0A287DTY5	0	0	0	0	0	0	0	0	0	0	0	0	0	0	0	0	0	0	0	0	0	0	0	0
F2CRN1	Predicted protein OS=Hordeum vulgare subsp. vulgare OX=112509 PE=2 SV=1	High	transport	membrane	catalytic activity	Pf08551																			F2CRN1	0	0	0	0	0	0	0	0	0	0	0	0	0	0	0	0	0	0	0	0	0	0	0	0
A0A287SJT7	Ald_Xan_dh_C2 domain-containing protein OS=Hordeum vulgare subsp. vulgare OX=112509 PE=4 SV=1	High																							A0A287SJT7	0	0	0	0	0	0	0	0	0	0	0	0	0	0	0	0	0	0	0	0	0	0	0	0
A0A287L2F7	Uncharacterized protein OS=Hordeum vulgare subsp. vulgare OX=112509 PE=4 SV=1	High					-0.0134503	-0.221313	-0.342493	-0.466216	0.201088	0.943383	-0.232368	-0.248028	0.377684	0.981826	-0.012732	0.361361			-0.706527	0.990416	0.844428	0.33432	A0A287L2F7	0	0	0	0	0	0	0	0	0	0	0	0	0	0	0	0	0	0	0	0	0	0	0	0
F2DCY0	Predicted protein (Fragment) OS=Hordeum vulgare subsp. vulgare OX=112509 PE=2 SV=1	High	metabolic process;response to stimulus	membrane;mitochondrion	catalytic activity	Pf00384,Pf09326,Pf10588																			F2DCY0	0	0	0	0	0	0	0	0	0	0	0	0	0	0	0	0	0	0	0	0	0	0	0	0
F2E1V5	Predicted protein OS=Hordeum vulgare subsp. vulgare OX=112509 PE=2 SV=1	High	metabolic process;regulation of biological process		catalytic activity;nucleotide binding;protein binding	Pf00004,Pf00158,Pf02861,Pf04111,Pf06414,Pf07724,Pf07728,Pf10431,Pf13177,Pf13191,Pf13401,Pf13864																			F2E1V5	0	0	0	0	0	0	0	0	0	0	0	0	0	0	0	0	0	0	0	0	0	0	0	0
F2DN53	Predicted protein OS=Hordeum vulgare subsp. vulgare OX=112509 PE=2 SV=1	High	cell organization and biogenesis;transport	Golgi;membrane	protein binding	Pf03908,Pf05008,Pf12352																			F2DN53	0	0	0	0	0	0	0	0	0	0	0	0	0	0	0	0	0	0	0	0	0	0	0	0
A0A287DWF2	Uncharacterized protein OS=Hordeum vulgare subsp. vulgare OX=112509 PE=4 SV=1	High																							A0A287DWF2	0	0	0	0	0	0	0	0	0	0	0	0	0	0	0	0	0	0	0	0	0	0	0	0
A0A287R332	UBA_e1_C domain-containing protein OS=Hordeum vulgare subsp. vulgare OX=112509 PE=3 SV=1	High																							A0A287R332	0	0	0	0	0	0	0	0	0	0	0	0	0	0	0	0	0	0	0	0	0	0	0	0
A0A287SDG5	Pept_C1 domain-containing protein OS=Hordeum vulgare subsp. vulgare OX=112509 PE=3 SV=1	High																							A0A287SDG5	0	0	0	0	0	0	0	0	0	0	0	0	0	0	0	0	0	0	0	0	0	0	0	0
A0A287UAX6	Ribosomal_L14e domain-containing protein OS=Hordeum vulgare subsp. vulgare OX=112509 PE=4 SV=1	High						0.109742	1.27914	1.48485	0.0866746	-0.297298	0.282215	-0.213876	0.293382	-0.52462	-0.251313	-0.153949							A0A287UAX6	0	0	0	0	0	0	0	0	0	0	0	0	0	0	0	0	0	0	0	0	0	0	0	0
F2E3J3	Predicted protein OS=Hordeum vulgare subsp. vulgare OX=112509 PE=2 SV=1	High			RNA binding	Pf00076,Pf10243,Pf13893,Pf14259																			F2E3J3	0	0	0	0	0	0	0	0	0	0	0	0	0	0	0	0	0	0	0	0	0	0	0	0
A0A287EEA4	Uncharacterized protein OS=Hordeum vulgare subsp. vulgare OX=112509 PE=4 SV=1	High																							A0A287EEA4	0	0	0	0	0	0	0	0	0	0	0	0	0	0	0	0	0	0	0	0	0	0	0	0
M0UQC4	Protein kinase domain-containing protein OS=Hordeum vulgare subsp. vulgare OX=112509 PE=4 SV=1	High	metabolic process	membrane	catalytic activity;nucleotide binding;protein binding	Pf00069,Pf07714,Pf08263,Pf12799,Pf13855																			M0UQC4	0	0	0	0	0	0	0	0	0	0	0	0	0	0	0	0	0	0	0	0	0	0	0	0
Q1ENF0	Cystatin Hv-CPI8 OS=Hordeum vulgare OX=4513 GN=icy8 PE=2 SV=1	High	regulation of biological process		enzyme regulator activity	Pf00031,Pf07430	0.0376988	0.0481684	0.30121	-0.10203	0.637448	-0.147389	-0.0324269	-0.182318	-0.0105789	-0.706621	-0.331106	-1.08137	-0.316275	-0.756262	0.174589	-0.488284	0.366709	-0.180593	Q1ENF0	0	0	0	0	0	0	0	0	0	0	0	0	0	0	0	0	0	0	0	0	0	0	0	0
A0A287WSC6	LETM1 domain-containing protein OS=Hordeum vulgare subsp. vulgare OX=112509 PE=4 SV=1	High																							A0A287WSC6	0	0	0	0	0	0	0	0	0	0	0	0	0	0	0	0	0	0	0	0	0	0	0	0
A0A287JG23	Uncharacterized protein OS=Hordeum vulgare subsp. vulgare OX=112509 PE=3 SV=1	High																							A0A287JG23	0	0	0	0	0	0	0	0	0	0	0	0	0	0	0	0	0	0	0	0	0	0	0	0
A0A287LD69	PALP domain-containing protein OS=Hordeum vulgare subsp. vulgare OX=112509 PE=4 SV=1	High																							A0A287LD69	0	0	0	0	0	0	0	0	0	0	0	0	0	0	0	0	0	0	0	0	0	0	0	0
A0A287X924	Uncharacterized protein OS=Hordeum vulgare subsp. vulgare OX=112509 PE=3 SV=1	High					0.165901	-0.0771957	-0.314388	0.66827	0.867219	0.765309	0.164764	-0.148899	0.227277	0.217996	0.259817	0.147445	0.185771	-0.255952	0.260428	0.0850719	-0.230619	-0.212089	A0A287X924	0	0	0	0	0	0	0	0	0	0	0	0	0	0	0	0	0	0	0	0	0	0	0	0
F2DRT5	Predicted protein OS=Hordeum vulgare subsp. vulgare OX=112509 PE=2 SV=1	High	regulation of biological process;response to stimulus			Pf07052	0.123992	0.607576	-0.00957926	0.736168	0.499931	-0.0997942	0.558179	0.571638	-0.0335852	0.389847	-0.145581	0.337632	-0.127241	-0.997837	-0.292758	0.0491874	0.318879	0.811711	F2DRT5	0	0	0	0	0	0	0	0	0	0	0	0	0	0	0	0	0	0	0	0	0	0	0	0
A0A287VAP3	Epimerase domain-containing protein OS=Hordeum vulgare subsp. vulgare OX=112509 PE=4 SV=1	High																							A0A287VAP3	0	0	0	0	0	0	0	0	0	0	0	0	0	0	0	0	0	0	0	0	0	0	0	0
F2DNZ2	Predicted protein OS=Hordeum vulgare subsp. vulgare OX=112509 PE=2 SV=1	High	metabolic process		catalytic activity;protein binding	Pf00077,Pf00240,Pf00627,Pf08284,Pf09668,Pf11976,Pf13650,Pf13975																			F2DNZ2	0	0	0	0	0	0	0	0	0	0	0	0	0	0	0	0	0	0	0	0	0	0	0	0
M0XSW7	Abhydrolase_3 domain-containing protein OS=Hordeum vulgare subsp. vulgare OX=112509 PE=4 SV=1	High	metabolic process		catalytic activity	Pf00135,Pf07859,Pf12697																			M0XSW7	0	0	0	0	0	0	0	0	0	0	0	0	0	0	0	0	0	0	0	0	0	0	0	0
F2E0X3	Tubulin-specific chaperone A (Fragment) OS=Hordeum vulgare subsp. vulgare OX=112509 PE=2 SV=1	High	cell organization and biogenesis;metabolic process	cytoplasm;cytoskeleton	protein binding	Pf02970																			F2E0X3	0	0	0	0	0	0	0	0	0	0	0	0	0	0	0	0	0	0	0	0	0	0	0	0
A0A287W596	Uncharacterized protein OS=Hordeum vulgare subsp. vulgare OX=112509 PE=4 SV=1	High					0.55022	0.486587	0.350156	-0.378739	0.335561	-0.426848	-0.046839	0.120527	0.276453	0.190409	0.399573	-0.392121	-0.0179171	0.387697	0.11879	-0.3378	-0.547654	0.372338	A0A287W596	0	0	0	0	0	0	0	0	0	0	0	0	0	0	0	0	0	0	0	0	0	0	0	0
A0A287IKY5	Uncharacterized protein OS=Hordeum vulgare subsp. vulgare OX=112509 PE=4 SV=1	High																							A0A287IKY5	0	0	0	0	0	0	0	0	0	0	0	0	0	0	0	0	0	0	0	0	0	0	0	0
A0A287SIW3	Ferredoxin--NADP reductase, chloroplastic OS=Hordeum vulgare subsp. vulgare OX=112509 PE=3 SV=1	High																							A0A287SIW3	0	0	0	0	0	0	0	0	0	0	0	0	0	0	0	0	0	0	0	0	0	0	0	0
A1E9U6	30S ribosomal protein S18, chloroplastic OS=Sorghum bicolor OX=4558 GN=rps18 PE=3 SV=1	High	metabolic process	ribosome	RNA binding;structural molecule activity	Pf01084	0.304593	-0.112293	0.739251	-0.195743	-0.547638	-1.0581	-0.231931	0.205575	-0.16735	-1.34821	-0.345277	-0.58781	1.34216	0.853727	0.53763	0.867605	0.543833	-0.513836	A1E9U6	0	0	0	0	0	0	0	0	0	0	0	0	0	0	0	0	0	0	0	0	0	0	0	0
F2DS55	Predicted protein OS=Hordeum vulgare subsp. vulgare OX=112509 PE=2 SV=1	High			protein binding	Pf00168																			F2DS55	0	0	0	0	0	0	0	0	0	0	0	0	0	0	0	0	0	0	0	0	0	0	0	0
A0A287MTS4	Pectin acetylesterase OS=Hordeum vulgare subsp. vulgare OX=112509 PE=3 SV=1	High																							A0A287MTS4	0	0	0	0	0	0	0	0	0	0	0	0	0	0	0	0	0	0	0	0	0	0	0	0
A0A287GFQ2	Aldedh domain-containing protein OS=Hordeum vulgare subsp. vulgare OX=112509 PE=4 SV=1	High																							A0A287GFQ2	0	0	0	0	0	0	0	0	0	0	0	0	0	0	0	0	0	0	0	0	0	0	0	0
F2CTT6	Methylthioribose-1-phosphate isomerase OS=Hordeum vulgare subsp. vulgare OX=112509 PE=2 SV=1	High	metabolic process	cytoplasm;nucleus	catalytic activity	Pf01008																			F2CTT6	0	0	0	0	0	0	0	0	0	0	0	0	0	0	0	0	0	0	0	0	0	0	0	0
A0A287GZB7	Uncharacterized protein OS=Hordeum vulgare subsp. vulgare OX=112509 PE=4 SV=1	High																							A0A287GZB7	0	0	0	0	0	0	0	0	0	0	0	0	0	0	0	0	0	0	0	0	0	0	0	0
A0A287UK40	Pyr_redox_2 domain-containing protein OS=Hordeum vulgare subsp. vulgare OX=112509 PE=4 SV=1	High																							A0A287UK40	0	0	0	0	0	0	0	0	0	0	0	0	0	0	0	0	0	0	0	0	0	0	0	0
F2EH52	Predicted protein OS=Hordeum vulgare subsp. vulgare OX=112509 PE=2 SV=1	High				Pf00011																			F2EH52	0	0	0	0	0	0	0	0	0	0	0	0	0	0	0	0	0	0	0	0	0	0	0	0
F2CSZ9	Predicted protein OS=Hordeum vulgare subsp. vulgare OX=112509 PE=2 SV=1	High	metabolic process		catalytic activity	Pf00135,Pf07859,Pf12695																			F2CSZ9	0	0	0	0	0	0	0	0	0	0	0	0	0	0	0	0	0	0	0	0	0	0	0	0
A0A287FG05	Uncharacterized protein OS=Hordeum vulgare subsp. vulgare OX=112509 PE=4 SV=1	High																							A0A287FG05	0	0	0	0	0	0	0	0	0	0	0	0	0	0	0	0	0	0	0	0	0	0	0	0
F2EEH9	Non-specific lipid-transfer protein OS=Hordeum vulgare subsp. vulgare OX=112509 PE=2 SV=1	High	transport			Pf00234,Pf14368																			F2EEH9	0	0	0	0	0	0	0	0	0	0	0	0	0	0	0	0	0	0	0	0	0	0	0	0
A0A287HK53	Uncharacterized protein OS=Hordeum vulgare subsp. vulgare OX=112509 PE=4 SV=1	High																							A0A287HK53	0	0	0	0	0	0	0	0	0	0	0	0	0	0	0	0	0	0	0	0	0	0	0	0
F2D1B1	Predicted protein OS=Hordeum vulgare subsp. vulgare OX=112509 PE=2 SV=1	High	metabolic process		catalytic activity	Pf00082,Pf05922																			F2D1B1	0	0	0	0	0	0	0	0	0	0	0	0	0	0	0	0	0	0	0	0	0	0	0	0
A0A287QPF0	Usp domain-containing protein OS=Hordeum vulgare subsp. vulgare OX=112509 PE=4 SV=1	High																							A0A287QPF0	0	0	0	0	0	0	0	0	0	0	0	0	0	0	0	0	0	0	0	0	0	0	0	0
M0WWY8	RF_PROK_I domain-containing protein OS=Hordeum vulgare subsp. vulgare OX=112509 PE=4 SV=1	High	cell organization and biogenesis		RNA binding	Pf00472	0.380004	-0.30043	-1.06299	0.333858	-0.10477	0.0630012	0.861387	0.838206	0.591969	0.34773	0.486791	0.55634	0.478785	0.35874	-0.0932622	0.846034		1.73877	M0WWY8	0	0	0	0	0	0	0	0	0	0	0	0	0	0	0	0	0	1	1	0	0	1	0	0
Q00327	Photosystem I reaction center subunit V, chloroplastic OS=Hordeum vulgare OX=4513 GN=PSAG PE=1 SV=1	High	metabolic process;regulation of biological process	membrane		Pf01241	1.69397	2.13564	1.92662	0.0664699	-0.239812		0.652556	1.30654	0.44413	-0.43764	0.249255	0.0560476	0.630825		-0.281701				Q00327	1	1	1	0	0	0	0	0	0	0	0	0	0	0	0	0	0	0	3	3	0	0	1	1
A0A287P023	Macro domain-containing protein OS=Hordeum vulgare subsp. vulgare OX=112509 PE=4 SV=1	High																							A0A287P023	0	0	0	0	0	0	0	0	0	0	0	0	0	0	0	0	0	0	0	0	0	0	0	0
M0X5Q3	Uncharacterized protein OS=Hordeum vulgare subsp. vulgare OX=112509 PE=3 SV=1	High	cell communication;metabolic process;response to stimulus	membrane	catalytic activity;metal ion binding;nucleotide binding	Pf00289,Pf02142,Pf02222,Pf02786,Pf02787,Pf07478,Pf08442,Pf08443,Pf13535,Pf13549,Pf15632																			M0X5Q3	0	0	0	0	0	0	0	0	0	0	0	0	0	0	0	0	0	0	0	0	0	0	0	0
A0A287PMH1	YTH domain-containing protein OS=Hordeum vulgare subsp. vulgare OX=112509 PE=4 SV=1	High																							A0A287PMH1	0	0	0	0	0	0	0	0	0	0	0	0	0	0	0	0	0	0	0	0	0	0	0	0
A0A287RHH7	Uncharacterized protein OS=Hordeum vulgare subsp. vulgare OX=112509 PE=4 SV=1	High																							A0A287RHH7	0	0	0	0	0	0	0	0	0	0	0	0	0	0	0	0	0	0	0	0	0	0	0	0
F2E3S9	Predicted protein OS=Hordeum vulgare subsp. vulgare OX=112509 PE=2 SV=1	High		membrane		Pf14159	1.16298	1.4766	2.46672	0.0874366	0.748612	0.632103	0.809597	0.367796	0.268023	-0.952184	-0.863426	-0.778634				-0.441436	0.437633	-1.40434	F2E3S9	0	0	1	0	0	0	0	0	0	0	0	0	0	0	0	0	0	0	1	1	0	0	0	0
F2DPS5	Predicted protein OS=Hordeum vulgare subsp. vulgare OX=112509 PE=2 SV=1	High	cell organization and biogenesis;defense response;metabolic process;response to stimulus	membrane	catalytic activity	Pf11909		0.203629	2.54883	0.485956	-0.0276328	0.759259	0.783104	1.40957	0.175115	-0.754598	0.752186	-0.486323				-0.663306	0.541805	-0.643864	F2DPS5	0	0	1	0	0	0	0	0	0	0	0	0	0	0	0	0	0	0	1	1	0	0	0	0
A0A287WCS9	Protein DETOXIFICATION OS=Hordeum vulgare subsp. vulgare OX=112509 PE=4 SV=1	High					-0.87919	0.314166	1.04258	0.623944	-0.510768	0.712992	-0.624164	-0.48934	-0.14908	-0.81991	-0.921026	-0.200514	0.942478	0.030906	-0.48228	0.395662	0.78618	0.377078	A0A287WCS9	0	0	0	0	0	0	0	0	0	0	0	0	0	0	0	0	0	0	0	0	0	0	0	0
M0VJ84	Acetyltransferase component of pyruvate dehydrogenase complex OS=Hordeum vulgare subsp. vulgare OX=112509 PE=3 SV=1	High	metabolic process	organelle lumen	catalytic activity	Pf00198,Pf00364,Pf02817																			M0VJ84	0	0	0	0	0	0	0	0	0	0	0	0	0	0	0	0	0	0	0	0	0	0	0	0
A0A287GWJ0	Glyco_transf_28 domain-containing protein OS=Hordeum vulgare subsp. vulgare OX=112509 PE=4 SV=1	High					-0.208322	0.0337907	-1.07251	1.44592	0.950877	0.716275	0.453272	0.344047	0.270339	-0.112623	0.0698117	-0.115987			0.103509	-0.177592	-0.314859	-0.492959	A0A287GWJ0	0	0	0	0	0	0	0	0	0	0	0	0	0	0	0	0	0	0	0	0	0	0	0	0
A0A287HJA4	RRM domain-containing protein OS=Hordeum vulgare subsp. vulgare OX=112509 PE=4 SV=1	High																							A0A287HJA4	0	0	0	0	0	0	0	0	0	0	0	0	0	0	0	0	0	0	0	0	0	0	0	0
A0A287KV81	SECA_MOTOR_DEAD domain-containing protein OS=Hordeum vulgare subsp. vulgare OX=112509 PE=4 SV=1	High																							A0A287KV81	0	0	0	0	0	0	0	0	0	0	0	0	0	0	0	0	0	0	0	0	0	0	0	0
F2CQT6	Predicted protein OS=Hordeum vulgare subsp. vulgare OX=112509 PE=2 SV=1	High	metabolic process			Pf08648	-0.0542168	0.167091	0.375621	0.24022	0.236901	0.195009	-0.11692	0.00401327	-0.264247	0.264296	0.421192	0.413852	-0.820851		-0.309185	-0.496999	-0.841298	-1.16144	F2CQT6	0	0	0	0	0	0	0	0	0	0	0	0	0	0	0	0	0	0	0	0	0	0	0	0
F2EL93	Predicted protein OS=Hordeum vulgare subsp. vulgare OX=112509 PE=2 SV=1	High	cell communication;cell organization and biogenesis;metabolic process;regulation of biological process;response to stimulus		catalytic activity;nucleotide binding	Pf03109,Pf06176																			F2EL93	0	0	0	0	0	0	0	0	0	0	0	0	0	0	0	0	0	0	0	0	0	0	0	0
A0A287X1T6	Uncharacterized protein OS=Hordeum vulgare subsp. vulgare OX=112509 PE=4 SV=1	High																							A0A287X1T6	0	0	0	0	0	0	0	0	0	0	0	0	0	0	0	0	0	0	0	0	0	0	0	0
M0Y242	Uncharacterized protein OS=Hordeum vulgare subsp. vulgare OX=112509 PE=4 SV=1	High		membrane	protein binding	Pf13855																			M0Y242	0	0	0	0	0	0	0	0	0	0	0	0	0	0	0	0	0	0	0	0	0	0	0	0
P93191	Nonspecific lipid transfer protein OS=Hordeum vulgare OX=4513 GN=ltp-BR1 PE=2 SV=1	High	transport			Pf00234																			P93191	0	0	0	0	0	0	0	0	0	0	0	0	0	0	0	0	0	0	0	0	0	0	0	0
F2D6T1	Predicted protein OS=Hordeum vulgare subsp. vulgare OX=112509 PE=2 SV=1	High	metabolic process		catalytic activity;nucleotide binding																				F2D6T1	0	0	0	0	0	0	0	0	0	0	0	0	0	0	0	0	0	0	0	0	0	0	0	0
F2DE66	Predicted protein OS=Hordeum vulgare subsp. vulgare OX=112509 PE=2 SV=1	High	metabolic process	cytoplasm	catalytic activity;nucleotide binding;RNA binding	Pf00133,Pf01588,Pf09334																			F2DE66	0	0	0	0	0	0	0	0	0	0	0	0	0	0	0	0	0	0	0	0	0	0	0	0
A0A287S072	Photolyase/cryptochrome alpha/beta domain-containing protein OS=Hordeum vulgare subsp. vulgare OX=112509 PE=4 SV=1	High																							A0A287S072	0	0	0	0	0	0	0	0	0	0	0	0	0	0	0	0	0	0	0	0	0	0	0	0
A0A287GPL7	Proteasome subunit beta OS=Hordeum vulgare subsp. vulgare OX=112509 PE=3 SV=1	High					0.46698	0.431956	0.187614	1.7008	0.286489	0.238552	-0.26671	-0.243479	-0.325623	0.486707	-0.657437	1.47078	0.120931	1.47084	0.181889				A0A287GPL7	0	0	0	1	0	0	0	0	0	0	0	0	0	0	0	0	0	0	1	1	0	0	1	0
A0A287SLC9	PITH domain-containing protein OS=Hordeum vulgare subsp. vulgare OX=112509 PE=4 SV=1	High																							A0A287SLC9	0	0	0	0	0	0	0	0	0	0	0	0	0	0	0	0	0	0	0	0	0	0	0	0
A0A287T3E6	Uncharacterized protein OS=Hordeum vulgare subsp. vulgare OX=112509 PE=4 SV=1	High																							A0A287T3E6	0	0	0	0	0	0	0	0	0	0	0	0	0	0	0	0	0	0	0	0	0	0	0	0
F2DT98	Predicted protein OS=Hordeum vulgare subsp. vulgare OX=112509 PE=2 SV=1	High				Pf01812	-0.931455	-0.134921	-0.768471	0.350514	0.666302	0.330544	0.214129	0.445896	-0.219098	-0.328408	0.177816	-0.65186	0.140802	-0.224521	-0.0757691	-0.60645	-0.685125	-0.707128	F2DT98	0	0	0	0	0	0	0	0	0	0	0	0	0	0	0	0	0	0	0	0	0	0	0	0
A0A287W624	Pyrophosphate--fructose 6-phosphate 1-phosphotransferase subunit beta OS=Hordeum vulgare subsp. vulgare OX=112509 GN=PFP-BETA PE=3 SV=1	High																							A0A287W624	0	0	0	0	0	0	0	0	0	0	0	0	0	0	0	0	0	0	0	0	0	0	0	0
M0WB23	VPS9 domain-containing protein OS=Hordeum vulgare subsp. vulgare OX=112509 PE=4 SV=1	High				Pf02204																			M0WB23	0	0	0	0	0	0	0	0	0	0	0	0	0	0	0	0	0	0	0	0	0	0	0	0
M0YQV8	Uncharacterized protein OS=Hordeum vulgare subsp. vulgare OX=112509 PE=4 SV=1	High	metabolic process		catalytic activity	Pf01650																			M0YQV8	0	0	0	0	0	0	0	0	0	0	0	0	0	0	0	0	0	0	0	0	0	0	0	0
A0A287VJ12	Mg-por_mtran_C domain-containing protein OS=Hordeum vulgare subsp. vulgare OX=112509 PE=4 SV=1	High																							A0A287VJ12	0	0	0	0	0	0	0	0	0	0	0	0	0	0	0	0	0	0	0	0	0	0	0	0
F2DDV7	Predicted protein OS=Hordeum vulgare subsp. vulgare OX=112509 PE=2 SV=1	High		membrane			-0.0332806	0.0926792	-0.629594	-0.352413	1.05563	0.885117	0.00935726	-0.0547077	-0.0767904	0.109157	-0.148477	0.138166	0.085825	-0.14638	-0.406872	-0.911074	-0.851559	0.11746	F2DDV7	0	0	0	0	0	0	0	0	0	0	0	0	0	0	0	0	0	0	0	0	0	0	0	0
F2DLP9	Predicted protein OS=Hordeum vulgare subsp. vulgare OX=112509 PE=2 SV=1	High	metabolic process		protein binding		-0.724006	-0.475437	-0.235729	0.316727	0.311748	-0.144083	-0.58869	-0.348883	-0.502334	-0.0837691	0.379494	0.0515801	-1.66306	-1.93542	-0.545347	0.162198	-0.771853	-0.938836	F2DLP9	0	0	0	0	0	0	0	0	0	0	0	0	-1	-1	0	0	0	0	2	0	0	2	1	1
A0A287JTU1	Uncharacterized protein OS=Hordeum vulgare subsp. vulgare OX=112509 PE=4 SV=1	High					1.4787	0.503839	1.21831	0.702493	1.12418	0.598505	1.77129	0.528127	0.73937	-0.181817	0.119512	0.032252	-0.714699	1.73712	1.19279	0.957227	-0.469131	0.902066	A0A287JTU1	0	0	0	0	0	0	1	0	0	0	0	0	0	1	0	0	0	0	2	0	1	1	1	1
A0A287TZI6	Histone deacetylase OS=Hordeum vulgare subsp. vulgare OX=112509 PE=4 SV=1	High																							A0A287TZI6	0	0	0	0	0	0	0	0	0	0	0	0	0	0	0	0	0	0	0	0	0	0	0	0
A0A287THB5	Uncharacterized protein OS=Hordeum vulgare subsp. vulgare OX=112509 PE=3 SV=1	High																							A0A287THB5	0	0	0	0	0	0	0	0	0	0	0	0	0	0	0	0	0	0	0	0	0	0	0	0
F2D5K9	Predicted protein OS=Hordeum vulgare subsp. vulgare OX=112509 PE=2 SV=1	High			catalytic activity	Pf00657	0.0392822	-0.193774	1.0996	0.142696	-0.31168	0.304466	-0.134682	-0.547247	-0.362114	-0.177094	-0.242213	-0.0259812				0.291897	0.610631		F2D5K9	0	0	0	0	0	0	0	0	0	0	0	0	0	0	0	0	0	0	0	0	0	0	0	0
A0A287UBZ4	CN hydrolase domain-containing protein OS=Hordeum vulgare subsp. vulgare OX=112509 PE=4 SV=1	High																							A0A287UBZ4	0	0	0	0	0	0	0	0	0	0	0	0	0	0	0	0	0	0	0	0	0	0	0	0
A0A287F5K5	Uncharacterized protein OS=Hordeum vulgare subsp. vulgare OX=112509 PE=4 SV=1	High																							A0A287F5K5	0	0	0	0	0	0	0	0	0	0	0	0	0	0	0	0	0	0	0	0	0	0	0	0
A0A287GX97	ClpS domain-containing protein OS=Hordeum vulgare subsp. vulgare OX=112509 PE=4 SV=1	High					0.147779	0.0763751	0.0498358	-1.16288	-0.174653	-0.864386	-0.119484	-0.253487	-0.513537	-0.0461648	0.234087	0.274838	-0.598483	0.0338092	-0.0963833	-1.18765	-1.4075	-0.932861	A0A287GX97	0	0	0	0	0	0	0	0	0	0	0	0	0	0	0	0	0	0	0	0	0	0	0	0
F2CWW1	Predicted protein OS=Hordeum vulgare subsp. vulgare OX=112509 PE=2 SV=1	High	cell organization and biogenesis;regulation of biological process;transport	membrane	protein binding	Pf02096	-0.08757	0.452887	0.0895701	0.692263	1.45801	0.650754	-0.212703	0.0424295	-0.0574758	0.718212	0.858853	0.506547	-1.21619	-1.71087	-0.877868	0.309981	0.316604	0.786807	F2CWW1	0	0	0	0	0	0	0	0	0	0	0	0	0	-1	0	0	0	0	1	0	0	1	0	1
F2DPK4	Predicted protein (Fragment) OS=Hordeum vulgare subsp. vulgare OX=112509 PE=2 SV=1	High																							F2DPK4	0	0	0	0	0	0	0	0	0	0	0	0	0	0	0	0	0	0	0	0	0	0	0	0
A0A287GN14	Uncharacterized protein OS=Hordeum vulgare subsp. vulgare OX=112509 PE=3 SV=1	High																							A0A287GN14	0	0	0	0	0	0	0	0	0	0	0	0	0	0	0	0	0	0	0	0	0	0	0	0
M0WMQ0	Uncharacterized protein OS=Hordeum vulgare subsp. vulgare OX=112509 PE=4 SV=1	High				Pf13911																			M0WMQ0	0	0	0	0	0	0	0	0	0	0	0	0	0	0	0	0	0	0	0	0	0	0	0	0
F2DNA9	Predicted protein OS=Hordeum vulgare subsp. vulgare OX=112509 PE=2 SV=1	High			catalytic activity;metal ion binding	Pf00491																			F2DNA9	0	0	0	0	0	0	0	0	0	0	0	0	0	0	0	0	0	0	0	0	0	0	0	0
A0A287K5Z0	Asparagine synthetase domain-containing protein OS=Hordeum vulgare subsp. vulgare OX=112509 PE=4 SV=1	High																							A0A287K5Z0	0	0	0	0	0	0	0	0	0	0	0	0	0	0	0	0	0	0	0	0	0	0	0	0
A0A287P260	Adenylosuccinate lyase OS=Hordeum vulgare subsp. vulgare OX=112509 PE=3 SV=1	High																							A0A287P260	0	0	0	0	0	0	0	0	0	0	0	0	0	0	0	0	0	0	0	0	0	0	0	0
A0A287NDL5	Protein kinase domain-containing protein OS=Hordeum vulgare subsp. vulgare OX=112509 PE=4 SV=1	High																							A0A287NDL5	0	0	0	0	0	0	0	0	0	0	0	0	0	0	0	0	0	0	0	0	0	0	0	0
A0A287WDK6	SURP motif domain-containing protein OS=Hordeum vulgare subsp. vulgare OX=112509 PE=4 SV=1	High																							A0A287WDK6	0	0	0	0	0	0	0	0	0	0	0	0	0	0	0	0	0	0	0	0	0	0	0	0
A0A287FRC5	Uncharacterized protein OS=Hordeum vulgare subsp. vulgare OX=112509 PE=3 SV=1	High																							A0A287FRC5	0	0	0	0	0	0	0	0	0	0	0	0	0	0	0	0	0	0	0	0	0	0	0	0
A0A287U3A1	Isocitrate dehydrogenase [NAD] subunit, mitochondrial OS=Hordeum vulgare subsp. vulgare OX=112509 PE=4 SV=1	High																							A0A287U3A1	0	0	0	0	0	0	0	0	0	0	0	0	0	0	0	0	0	0	0	0	0	0	0	0
A0A287FQ66	RRM domain-containing protein OS=Hordeum vulgare subsp. vulgare OX=112509 PE=4 SV=1	High																							A0A287FQ66	0	0	0	0	0	0	0	0	0	0	0	0	0	0	0	0	0	0	0	0	0	0	0	0
A0A287XUW1	Chitin-binding type-1 domain-containing protein OS=Hordeum vulgare subsp. vulgare OX=112509 PE=4 SV=1	High																							A0A287XUW1	0	0	0	0	0	0	0	0	0	0	0	0	0	0	0	0	0	0	0	0	0	0	0	0
A0A287KMC2	AAA domain-containing protein OS=Hordeum vulgare subsp. vulgare OX=112509 PE=4 SV=1	High																							A0A287KMC2	0	0	0	0	0	0	0	0	0	0	0	0	0	0	0	0	0	0	0	0	0	0	0	0
A0A287NWM2	Nucleoside diphosphate kinase OS=Hordeum vulgare subsp. vulgare OX=112509 PE=3 SV=1	High																							A0A287NWM2	0	0	0	0	0	0	0	0	0	0	0	0	0	0	0	0	0	0	0	0	0	0	0	0
A0A287T108	RING-type domain-containing protein OS=Hordeum vulgare subsp. vulgare OX=112509 PE=4 SV=1	High					0.259141	0.914028	1.12863	-0.650795	0.448482	-0.990596	0.433335	1.14051	-0.159017	-0.2225	-0.347402	-1.13124	0.0370127	0.5419	0.00830918	1.00513	1.21466	2.29049	A0A287T108	0	0	0	0	0	0	0	0	0	0	0	0	0	0	0	0	0	1	1	0	0	1	0	0
A0A287PSU1	Uncharacterized protein OS=Hordeum vulgare subsp. vulgare OX=112509 PE=3 SV=1	High																							A0A287PSU1	0	0	0	0	0	0	0	0	0	0	0	0	0	0	0	0	0	0	0	0	0	0	0	0
Q8LLA7	CI2C OS=Hordeum vulgare OX=4513 GN=CI2c PE=4 SV=1	High	regulation of biological process;response to stimulus		enzyme regulator activity	Pf00280	0.60454	0.528037	-0.464229	-0.811125	-0.0632227	-0.537924	-0.0945714	-0.877397	-0.613684	0.851988	0.38349	-0.105946	0.284344	-0.175527	0.173843	-0.0735031	-0.612074	0.117851	Q8LLA7	0	0	0	0	0	0	0	0	0	0	0	0	0	0	0	0	0	0	0	0	0	0	0	0
F2DPX8	60S ribosomal export protein NMD3 OS=Hordeum vulgare subsp. vulgare OX=112509 PE=2 SV=1	High	transport	cytoplasm;nucleus		Pf04981																			F2DPX8	0	0	0	0	0	0	0	0	0	0	0	0	0	0	0	0	0	0	0	0	0	0	0	0
F2DBI7	Predicted protein OS=Hordeum vulgare subsp. vulgare OX=112509 PE=2 SV=1	High			nucleotide binding;protein binding	Pf00931,Pf12799,Pf13191,Pf13401,Pf13855	-1.49217	-0.128592	1.12712	-1.04099	-1.36918	0.968438	-1.24268	-1.12328	-1.61161	-1.44464	-1.57506	-1.87789	2.02476	4.40562	3.16144	-0.720967	-1.25228	-2.67071	F2DBI7	0	0	0	0	0	0	0	0	-1	0	-1	-1	1	1	1	0	0	-1	7	0	3	4	1	2
A0A386GZI0	Histone H3 (Fragment) OS=Fusarium subtropicale OX=2283686 PE=3 SV=1	High					-0.421814	-0.391047	-0.303753	-0.832418	-1.16664	-0.677509	-0.342294	-0.12386	-0.415575	-0.873818	-0.291351	-0.213806	-0.4455	0.980683	-0.837377	-0.805006	0.143658	-0.0206471	A0A386GZI0	0	0	0	0	0	0	0	0	0	0	0	0	0	0	0	0	0	0	0	0	0	0	0	0
F2EF07	Predicted protein OS=Hordeum vulgare subsp. vulgare OX=112509 PE=2 SV=1	High	metabolic process		RNA binding	Pf00076,Pf13893,Pf14259																			F2EF07	0	0	0	0	0	0	0	0	0	0	0	0	0	0	0	0	0	0	0	0	0	0	0	0
M0Y7Q2	Uncharacterized protein OS=Hordeum vulgare subsp. vulgare OX=112509 PE=4 SV=1	High		nucleus	DNA binding;metal ion binding	Pf01429,Pf07496																			M0Y7Q2	0	0	0	0	0	0	0	0	0	0	0	0	0	0	0	0	0	0	0	0	0	0	0	0
A0A287VFM8	PAZ domain-containing protein OS=Hordeum vulgare subsp. vulgare OX=112509 PE=4 SV=1	High																							A0A287VFM8	0	0	0	0	0	0	0	0	0	0	0	0	0	0	0	0	0	0	0	0	0	0	0	0
A0A287N3F8	Protein kinase domain-containing protein OS=Hordeum vulgare subsp. vulgare OX=112509 PE=4 SV=1	High					0.156773	0.298379	0.127142	2.69005	0.818563	1.03049	0.227127	0.119443	-0.212509	0.675639	-0.474171	0.0620739	0.124562	-0.10788	-0.101701	-0.40402	-0.739887	0.0427382	A0A287N3F8	0	0	0	1	0	0	0	0	0	0	0	0	0	0	0	0	0	0	1	1	0	0	1	0
F2D8C5	Predicted protein OS=Hordeum vulgare subsp. vulgare OX=112509 PE=2 SV=1	High																							F2D8C5	0	0	0	0	0	0	0	0	0	0	0	0	0	0	0	0	0	0	0	0	0	0	0	0
A0A287WNB3	Uncharacterized protein OS=Hordeum vulgare subsp. vulgare OX=112509 PE=4 SV=1	High																							A0A287WNB3	0	0	0	0	0	0	0	0	0	0	0	0	0	0	0	0	0	0	0	0	0	0	0	0
F2DCT0	Predicted protein OS=Hordeum vulgare subsp. vulgare OX=112509 PE=2 SV=1	High	regulation of biological process		enzyme regulator activity;protein binding	Pf09229																			F2DCT0	0	0	0	0	0	0	0	0	0	0	0	0	0	0	0	0	0	0	0	0	0	0	0	0
F2E3F5	Predicted protein OS=Hordeum vulgare subsp. vulgare OX=112509 PE=2 SV=1	High			RNA binding	Pf00076,Pf13893,Pf14259																			F2E3F5	0	0	0	0	0	0	0	0	0	0	0	0	0	0	0	0	0	0	0	0	0	0	0	0
A0A287J5Q6	Potassium transporter OS=Hordeum vulgare subsp. vulgare OX=112509 PE=4 SV=1	High																							A0A287J5Q6	0	0	0	0	0	0	0	0	0	0	0	0	0	0	0	0	0	0	0	0	0	0	0	0
A0A287N353	Phytocyanin domain-containing protein OS=Hordeum vulgare subsp. vulgare OX=112509 PE=4 SV=1	High																							A0A287N353	0	0	0	0	0	0	0	0	0	0	0	0	0	0	0	0	0	0	0	0	0	0	0	0
A0A287HT33	Uncharacterized protein OS=Hordeum vulgare subsp. vulgare OX=112509 PE=4 SV=1	High																							A0A287HT33	0	0	0	0	0	0	0	0	0	0	0	0	0	0	0	0	0	0	0	0	0	0	0	0
A0A287NBH6	Uncharacterized protein OS=Hordeum vulgare subsp. vulgare OX=112509 PE=4 SV=1	High																							A0A287NBH6	0	0	0	0	0	0	0	0	0	0	0	0	0	0	0	0	0	0	0	0	0	0	0	0
A0A287FBJ9	Uncharacterized protein OS=Hordeum vulgare subsp. vulgare OX=112509 PE=4 SV=1	High					-1.04899	0.559459	0.736021	1.76434	0.426491	1.02837	0.24663	0.861721	-0.697948	0.925821	1.32216	0.0833728	-0.459557	-3.49681	0.181459	1.75298	0.67905	0.431867	A0A287FBJ9	0	0	0	0	0	0	0	0	0	0	0	0	0	0	0	0	0	0	0	0	0	0	0	0
A0A287QPF4	Uncharacterized protein OS=Hordeum vulgare subsp. vulgare OX=112509 PE=4 SV=1	High																							A0A287QPF4	0	0	0	0	0	0	0	0	0	0	0	0	0	0	0	0	0	0	0	0	0	0	0	0
A0A287MJC2	Uncharacterized protein OS=Hordeum vulgare subsp. vulgare OX=112509 PE=4 SV=1	High					-0.011643	0.296596	0.0271483	-0.519654	0.633054	-0.0818657	0.0760382	0.0594459	-0.0950525	0.421225	0.16889	-0.0774839	0.0254371	0.25217	0.0155412	0.867041	0.857575	0.0620601	A0A287MJC2	0	0	0	0	0	0	0	0	0	0	0	0	0	0	0	0	0	0	0	0	0	0	0	0
F2CWI3	Predicted protein OS=Hordeum vulgare subsp. vulgare OX=112509 PE=2 SV=1	High		membrane																					F2CWI3	0	0	0	0	0	0	0	0	0	0	0	0	0	0	0	0	0	0	0	0	0	0	0	0
F2CQG1	Predicted protein OS=Hordeum vulgare subsp. vulgare OX=112509 PE=2 SV=1	High	metabolic process		catalytic activity;nucleotide binding	Pf00069																			F2CQG1	0	0	0	0	0	0	0	0	0	0	0	0	0	0	0	0	0	0	0	0	0	0	0	0
A0A287NYX4	Uncharacterized protein OS=Hordeum vulgare subsp. vulgare OX=112509 PE=3 SV=1	High																							A0A287NYX4	0	0	0	0	0	0	0	0	0	0	0	0	0	0	0	0	0	0	0	0	0	0	0	0
F2DGE6	Predicted protein OS=Hordeum vulgare subsp. vulgare OX=112509 PE=2 SV=1	High			protein binding	Pf00018,Pf14604																			F2DGE6	0	0	0	0	0	0	0	0	0	0	0	0	0	0	0	0	0	0	0	0	0	0	0	0
A0A287FR63	Uncharacterized protein OS=Hordeum vulgare subsp. vulgare OX=112509 PE=4 SV=1	High																							A0A287FR63	0	0	0	0	0	0	0	0	0	0	0	0	0	0	0	0	0	0	0	0	0	0	0	0
A0A287SH79	Uncharacterized protein OS=Hordeum vulgare subsp. vulgare OX=112509 PE=4 SV=1	High					-1.04551	0.0357426	1.29131	-1.11538	-0.918177	-0.771137	-0.406029	0.00261569	-0.260062	-1.71362	-0.219868	-1.58031	0.977047	0.545295	0.139293	0.390688	0.93051	-1.99635	A0A287SH79	0	0	0	0	0	0	0	0	0	-1	0	-1	0	0	0	0	0	-1	3	0	2	1	1	0
A0A287HDY1	RRM domain-containing protein OS=Hordeum vulgare subsp. vulgare OX=112509 PE=4 SV=1	High																							A0A287HDY1	0	0	0	0	0	0	0	0	0	0	0	0	0	0	0	0	0	0	0	0	0	0	0	0
A0A287FAB3	Uncharacterized protein OS=Hordeum vulgare subsp. vulgare OX=112509 PE=3 SV=1	High																							A0A287FAB3	0	0	0	0	0	0	0	0	0	0	0	0	0	0	0	0	0	0	0	0	0	0	0	0
F2DQB6	Predicted protein OS=Hordeum vulgare subsp. vulgare OX=112509 PE=2 SV=1	High																							F2DQB6	0	0	0	0	0	0	0	0	0	0	0	0	0	0	0	0	0	0	0	0	0	0	0	0
Q40048	ORF1 protein OS=Hordeum vulgare OX=4513 GN=ORF1 PE=2 SV=1	High	response to stimulus			Pf03242																			Q40048	0	0	0	0	0	0	0	0	0	0	0	0	0	0	0	0	0	0	0	0	0	0	0	0
A0A287U371	Myb-like domain-containing protein OS=Hordeum vulgare subsp. vulgare OX=112509 PE=4 SV=1	High																							A0A287U371	0	0	0	0	0	0	0	0	0	0	0	0	0	0	0	0	0	0	0	0	0	0	0	0
A0A287U7L4	PCI domain-containing protein OS=Hordeum vulgare subsp. vulgare OX=112509 PE=4 SV=1	High																							A0A287U7L4	0	0	0	0	0	0	0	0	0	0	0	0	0	0	0	0	0	0	0	0	0	0	0	0
M0VG14	Uncharacterized protein OS=Hordeum vulgare subsp. vulgare OX=112509 PE=4 SV=1	High					0.300151	0.621445	0.954596	-0.5285	-0.200501	-0.830143	-0.0124329	0.521388	0.25528	-0.414779	-0.227854	-0.631947	0.402654	0.414536	0.513553	-0.100074	-0.409199	0.478341	M0VG14	0	0	0	0	0	0	0	0	0	0	0	0	0	0	0	0	0	0	0	0	0	0	0	0
A0A287TFS6	PWWP domain-containing protein OS=Hordeum vulgare subsp. vulgare OX=112509 PE=4 SV=1	High																							A0A287TFS6	0	0	0	0	0	0	0	0	0	0	0	0	0	0	0	0	0	0	0	0	0	0	0	0
A0A287SGK1	Kinesin-like protein OS=Hordeum vulgare subsp. vulgare OX=112509 PE=3 SV=1	High																							A0A287SGK1	0	0	0	0	0	0	0	0	0	0	0	0	0	0	0	0	0	0	0	0	0	0	0	0
A0A287RBR8	Uncharacterized protein OS=Hordeum vulgare subsp. vulgare OX=112509 PE=4 SV=1	High																							A0A287RBR8	0	0	0	0	0	0	0	0	0	0	0	0	0	0	0	0	0	0	0	0	0	0	0	0
A0A287Q3Q1	Uncharacterized protein OS=Hordeum vulgare subsp. vulgare OX=112509 PE=4 SV=1	High																							A0A287Q3Q1	0	0	0	0	0	0	0	0	0	0	0	0	0	0	0	0	0	0	0	0	0	0	0	0
A0A287PL47	Uncharacterized protein OS=Hordeum vulgare subsp. vulgare OX=112509 PE=4 SV=1	High																							A0A287PL47	0	0	0	0	0	0	0	0	0	0	0	0	0	0	0	0	0	0	0	0	0	0	0	0
M0UGW6	SHSP domain-containing protein OS=Hordeum vulgare subsp. vulgare OX=112509 PE=3 SV=1	High				Pf00011	-0.326245	-0.301229	-0.20601	0.60643		-0.273187	-0.777777	0.452506	-0.347533	0.822465	0.330782	-1.41665	1.27205		0.444857	0.265049	0.817982	-2.00786	M0UGW6	0	0	0	0	0	0	0	0	0	0	0	0	0	0	0	0	0	-1	1	0	0	1	0	0
A0A287THZ1	ABC2_membrane domain-containing protein OS=Hordeum vulgare subsp. vulgare OX=112509 PE=4 SV=1	High					0.383785	1.3702	-0.304814	1.52028	1.13231	1.72147	1.65513	0.571905	-0.552955	0.258714	0.391432	0.18571	0.0398119	-1.2245	-0.563571	-0.33379	-0.760508	-1.06062	A0A287THZ1	0	0	0	1	0	1	1	0	0	0	0	0	0	0	0	0	0	0	3	2	1	0	2	0
A0A287VIK2	Uncharacterized protein OS=Hordeum vulgare subsp. vulgare OX=112509 PE=4 SV=1	High																							A0A287VIK2	0	0	0	0	0	0	0	0	0	0	0	0	0	0	0	0	0	0	0	0	0	0	0	0
F2DY67	Predicted protein OS=Hordeum vulgare subsp. vulgare OX=112509 PE=2 SV=1	High			catalytic activity	Pf00657																			F2DY67	0	0	0	0	0	0	0	0	0	0	0	0	0	0	0	0	0	0	0	0	0	0	0	0
A0A287NQC6	Uncharacterized protein OS=Hordeum vulgare subsp. vulgare OX=112509 PE=4 SV=1	High																							A0A287NQC6	0	0	0	0	0	0	0	0	0	0	0	0	0	0	0	0	0	0	0	0	0	0	0	0
F2D0S0	Predicted protein OS=Hordeum vulgare subsp. vulgare OX=112509 PE=2 SV=1	Medium				Pf11955																			F2D0S0	0	0	0	0	0	0	0	0	0	0	0	0	0	0	0	0	0	0	0	0	0	0	0	0
A0A287M3J9	Uncharacterized protein OS=Hordeum vulgare subsp. vulgare OX=112509 PE=3 SV=1	Medium																							A0A287M3J9	0	0	0	0	0	0	0	0	0	0	0	0	0	0	0	0	0	0	0	0	0	0	0	0
P08817	Acyl carrier protein 2, chloroplastic OS=Hordeum vulgare OX=4513 GN=ACL1.2 PE=1 SV=2	Medium	metabolic process			Pf00550	0.0499329	0.651279	0.0633417	-0.329125	-0.0212185	-0.534309	-0.0782178	0.346456	-0.481518	0.542296	0.0175739	-0.192076	-0.34734	0.584595	-0.140658	-0.596928	-1.11628	-1.14257	P08817	0	0	0	0	0	0	0	0	0	0	0	0	0	0	0	0	0	0	0	0	0	0	0	0
F2CUT4	Predicted protein OS=Hordeum vulgare subsp. vulgare OX=112509 PE=2 SV=1	Medium		membrane																					F2CUT4	0	0	0	0	0	0	0	0	0	0	0	0	0	0	0	0	0	0	0	0	0	0	0	0
F2CVP8	Predicted protein OS=Hordeum vulgare subsp. vulgare OX=112509 PE=2 SV=1	Medium		nucleus	DNA binding	Pf00505,Pf01388,Pf09011																			F2CVP8	0	0	0	0	0	0	0	0	0	0	0	0	0	0	0	0	0	0	0	0	0	0	0	0
M0WNW4	Arf-GAP domain-containing protein OS=Hordeum vulgare subsp. vulgare OX=112509 PE=4 SV=1	Medium	regulation of biological process		enzyme regulator activity;metal ion binding	Pf01412																			M0WNW4	0	0	0	0	0	0	0	0	0	0	0	0	0	0	0	0	0	0	0	0	0	0	0	0
A0A287LF16	Uncharacterized protein OS=Hordeum vulgare subsp. vulgare OX=112509 PE=3 SV=1	Medium																							A0A287LF16	0	0	0	0	0	0	0	0	0	0	0	0	0	0	0	0	0	0	0	0	0	0	0	0
A0A287KIY3	Uncharacterized protein OS=Hordeum vulgare subsp. vulgare OX=112509 PE=4 SV=1	Medium																							A0A287KIY3	0	0	0	0	0	0	0	0	0	0	0	0	0	0	0	0	0	0	0	0	0	0	0	0
A0A287GUI5	UDP-glucose 4-epimerase OS=Hordeum vulgare subsp. vulgare OX=112509 PE=3 SV=1	Medium																							A0A287GUI5	0	0	0	0	0	0	0	0	0	0	0	0	0	0	0	0	0	0	0	0	0	0	0	0
A0A287X340	Uncharacterized protein OS=Hordeum vulgare subsp. vulgare OX=112509 PE=3 SV=1	Medium					-0.0557872	0.194994	0.312824	-0.309031	0.00483759	0.135932	0.237553	0.753958	0.249505	0.26162	0.366399	-0.610746	-0.659137	-0.259847	-0.295629	-0.088572	0.05579	-0.352305	A0A287X340	0	0	0	0	0	0	0	0	0	0	0	0	0	0	0	0	0	0	0	0	0	0	0	0
A0A287VUI6	Uncharacterized protein OS=Hordeum vulgare subsp. vulgare OX=112509 PE=3 SV=1	Medium																							A0A287VUI6	0	0	0	0	0	0	0	0	0	0	0	0	0	0	0	0	0	0	0	0	0	0	0	0
A0A287NYM5	FANCI_S4 domain-containing protein OS=Hordeum vulgare subsp. vulgare OX=112509 PE=4 SV=1	Medium						-0.293176	-0.236168	-0.206655	0.150349	0.104682	-0.419589	-0.417493	-0.801652	-0.128287	0.138337	-0.505037		-0.0771069	0.0046655	-0.992851	-0.811963		A0A287NYM5	0	0	0	0	0	0	0	0	0	0	0	0	0	0	0	0	0	0	0	0	0	0	0	0
M0UU30	Iron-sulfur cluster assembly protein OS=Hordeum vulgare subsp. vulgare OX=112509 PE=3 SV=1	Medium	cell organization and biogenesis;metabolic process	mitochondrion;organelle lumen	metal ion binding	Pf01592																			M0UU30	0	0	0	0	0	0	0	0	0	0	0	0	0	0	0	0	0	0	0	0	0	0	0	0
A0A287HHQ0	NADH-u_ox-rdase domain-containing protein OS=Hordeum vulgare subsp. vulgare OX=112509 PE=4 SV=1	Medium																							A0A287HHQ0	0	0	0	0	0	0	0	0	0	0	0	0	0	0	0	0	0	0	0	0	0	0	0	0
F2D3M5	Predicted protein OS=Hordeum vulgare subsp. vulgare OX=112509 PE=2 SV=1	Medium				Pf01966,Pf13023																			F2D3M5	0	0	0	0	0	0	0	0	0	0	0	0	0	0	0	0	0	0	0	0	0	0	0	0
M0WVP6	Uncharacterized protein OS=Hordeum vulgare subsp. vulgare OX=112509 PE=4 SV=1	Medium				Pf01156	-0.416969	-0.531032	-0.977225	-0.286071	0.0485752	-0.713793	-0.175495	-0.524234	-0.0341779	-0.0698655	-0.336232	-0.164551	-0.664502	-0.183385	-0.434989	-0.503835	-1.36641	-1.02884	M0WVP6	0	0	0	0	0	0	0	0	0	0	0	0	0	0	0	0	0	0	0	0	0	0	0	0
A0A287XDP9	Uncharacterized protein OS=Hordeum vulgare subsp. vulgare OX=112509 PE=4 SV=1	Medium																							A0A287XDP9	0	0	0	0	0	0	0	0	0	0	0	0	0	0	0	0	0	0	0	0	0	0	0	0
M0W0Y5	Uncharacterized protein OS=Hordeum vulgare subsp. vulgare OX=112509 PE=4 SV=1	Medium																							M0W0Y5	0	0	0	0	0	0	0	0	0	0	0	0	0	0	0	0	0	0	0	0	0	0	0	0
A0A287LAH7	PRONE domain-containing protein OS=Hordeum vulgare subsp. vulgare OX=112509 PE=4 SV=1	Medium																							A0A287LAH7	0	0	0	0	0	0	0	0	0	0	0	0	0	0	0	0	0	0	0	0	0	0	0	0
M0X0B4	Uncharacterized protein OS=Hordeum vulgare subsp. vulgare OX=112509 PE=4 SV=1	Medium	transport			Pf00790,Pf03127																			M0X0B4	0	0	0	0	0	0	0	0	0	0	0	0	0	0	0	0	0	0	0	0	0	0	0	0
M0Y8M7	PABS domain-containing protein OS=Hordeum vulgare subsp. vulgare OX=112509 PE=3 SV=1	Medium	metabolic process		catalytic activity	Pf01564,Pf05430,Pf11899,Pf13578,Pf13659																			M0Y8M7	0	0	0	0	0	0	0	0	0	0	0	0	0	0	0	0	0	0	0	0	0	0	0	0
M0UGL3	Knot1 domain-containing protein OS=Hordeum vulgare subsp. vulgare OX=112509 PE=3 SV=1	Medium	defense response;response to stimulus			Pf00304																			M0UGL3	0	0	0	0	0	0	0	0	0	0	0	0	0	0	0	0	0	0	0	0	0	0	0	0
F2CTS8	Predicted protein OS=Hordeum vulgare subsp. vulgare OX=112509 PE=2 SV=1	Medium	metabolic process	nucleus		Pf07807,Pf07808																			F2CTS8	0	0	0	0	0	0	0	0	0	0	0	0	0	0	0	0	0	0	0	0	0	0	0	0
F2DZY4	Predicted protein OS=Hordeum vulgare subsp. vulgare OX=112509 PE=2 SV=1	Medium					-1.00771	-0.168046	-0.28004	-0.295819	-0.400744	-0.385478	-0.400873	-0.154118	-0.584098	-0.512427	0.206028	-0.749749	-0.592291	-0.816342	0.258416	-1.05976	-0.816602	-0.55342	F2DZY4	0	0	0	0	0	0	0	0	0	0	0	0	0	0	0	0	0	0	0	0	0	0	0	0
A0A287ND84	Protein kinase domain-containing protein OS=Hordeum vulgare subsp. vulgare OX=112509 PE=4 SV=1	Medium					0.314228	0.284735	0.621649	0.182185	0.458999	0.653938	0.525529	0.211295	0.561125	0.7436	0.319465	1.34809	-0.114959	0.0464107	-0.570029	0.364122	0.726962	0.317906	A0A287ND84	0	0	0	0	0	0	0	0	0	0	0	0	0	0	0	0	0	0	0	0	0	0	0	0
A0A287F4U4	Uncharacterized protein OS=Hordeum vulgare subsp. vulgare OX=112509 PE=4 SV=1	Medium					0.763417	0.624652	0.0482265	1.51453	0.529378	1.09173	0.693358	-0.294279	0.331051	1.60212	0.545729	1.57385	0.496391	0.434772	1.26529	1.2532	0.470028	2.28915	A0A287F4U4	0	0	0	1	0	0	0	0	0	1	0	1	0	0	0	0	0	1	4	1	2	1	2	0
A0A287XAI0	Uncharacterized protein OS=Hordeum vulgare subsp. vulgare OX=112509 PE=4 SV=1	Medium																							A0A287XAI0	0	0	0	0	0	0	0	0	0	0	0	0	0	0	0	0	0	0	0	0	0	0	0	0
A0A287RV06	Uncharacterized protein OS=Hordeum vulgare subsp. vulgare OX=112509 PE=4 SV=1	Medium					-0.210774	-0.779545	-0.424885	-0.489676	-0.126721	-1.14311	-0.368821	0.0959833	-0.353173	-0.573363	-0.750242	-0.0327808	-0.228779	-0.335141	-0.190658	-1.70605	-0.717417	-0.17641	A0A287RV06	0	0	0	0	0	0	0	0	0	0	0	0	0	0	0	0	0	0	0	0	0	0	0	0
A0A287WL84	ABC transporter domain-containing protein OS=Hordeum vulgare subsp. vulgare OX=112509 PE=3 SV=1	Medium																							A0A287WL84	0	0	0	0	0	0	0	0	0	0	0	0	0	0	0	0	0	0	0	0	0	0	0	0
A0A287TKC1	C2H2-type domain-containing protein OS=Hordeum vulgare subsp. vulgare OX=112509 PE=4 SV=1	Medium																							A0A287TKC1	0	0	0	0	0	0	0	0	0	0	0	0	0	0	0	0	0	0	0	0	0	0	0	0
A0A287TJ98	26S proteasome non-ATPase regulatory subunit 2 homolog OS=Hordeum vulgare subsp. vulgare OX=112509 PE=4 SV=1	Medium																							A0A287TJ98	0	0	0	0	0	0	0	0	0	0	0	0	0	0	0	0	0	0	0	0	0	0	0	0
A0A287NLQ0	Uncharacterized protein OS=Hordeum vulgare subsp. vulgare OX=112509 PE=4 SV=1	Medium																							A0A287NLQ0	0	0	0	0	0	0	0	0	0	0	0	0	0	0	0	0	0	0	0	0	0	0	0	0
A0A287RNF9	Patatin OS=Hordeum vulgare subsp. vulgare OX=112509 PE=3 SV=1	Medium																							A0A287RNF9	0	0	0	0	0	0	0	0	0	0	0	0	0	0	0	0	0	0	0	0	0	0	0	0
A0A287RSZ4	Uncharacterized protein OS=Hordeum vulgare subsp. vulgare OX=112509 PE=4 SV=1	Medium																							A0A287RSZ4	0	0	0	0	0	0	0	0	0	0	0	0	0	0	0	0	0	0	0	0	0	0	0	0
A0A287KWV5	Uncharacterized protein OS=Hordeum vulgare subsp. vulgare OX=112509 PE=4 SV=1	Medium																							A0A287KWV5	0	0	0	0	0	0	0	0	0	0	0	0	0	0	0	0	0	0	0	0	0	0	0	0
F2E931	40S ribosomal protein S21 OS=Hordeum vulgare subsp. vulgare OX=112509 PE=2 SV=1	Medium	metabolic process	ribosome	structural molecule activity	Pf01249																			F2E931	0	0	0	0	0	0	0	0	0	0	0	0	0	0	0	0	0	0	0	0	0	0	0	0
F2CVY7	Alpha-1,4 glucan phosphorylase (Fragment) OS=Hordeum vulgare subsp. vulgare OX=112509 PE=2 SV=1	Medium	metabolic process		catalytic activity	Pf00343																			F2CVY7	0	0	0	0	0	0	0	0	0	0	0	0	0	0	0	0	0	0	0	0	0	0	0	0
A0A287T4U5	Uncharacterized protein OS=Hordeum vulgare subsp. vulgare OX=112509 PE=4 SV=1	Medium					0.259824	0.518702	0.441233	0.0265573	0.216831	-0.235029	0.288718	0.00327996	0.227492	0.035625	0.807304	-0.410701	0.0391331	0.221648	-0.145095	-0.133329	-0.295229	0.0361568	A0A287T4U5	0	0	0	0	0	0	0	0	0	0	0	0	0	0	0	0	0	0	0	0	0	0	0	0
A0A287SQM7	Uncharacterized protein OS=Hordeum vulgare subsp. vulgare OX=112509 PE=4 SV=1	Medium																							A0A287SQM7	0	0	0	0	0	0	0	0	0	0	0	0	0	0	0	0	0	0	0	0	0	0	0	0
F2EI02	Predicted protein OS=Hordeum vulgare subsp. vulgare OX=112509 PE=2 SV=1	Medium																							F2EI02	0	0	0	0	0	0	0	0	0	0	0	0	0	0	0	0	0	0	0	0	0	0	0	0
F2CXH4	Glycine cleavage system P protein OS=Hordeum vulgare subsp. vulgare OX=112509 PE=2 SV=1	Medium	metabolic process	mitochondrion	catalytic activity	Pf02347																			F2CXH4	0	0	0	0	0	0	0	0	0	0	0	0	0	0	0	0	0	0	0	0	0	0	0	0
A0A287GQH9	Rad21_Rec8 domain-containing protein OS=Hordeum vulgare subsp. vulgare OX=112509 PE=4 SV=1	Medium																							A0A287GQH9	0	0	0	0	0	0	0	0	0	0	0	0	0	0	0	0	0	0	0	0	0	0	0	0
F2D0T9	Predicted protein OS=Hordeum vulgare subsp. vulgare OX=112509 PE=2 SV=1	Medium			nucleotide binding																				F2D0T9	0	0	0	0	0	0	0	0	0	0	0	0	0	0	0	0	0	0	0	0	0	0	0	0
A0A287ELI3	Uncharacterized protein OS=Hordeum vulgare subsp. vulgare OX=112509 PE=4 SV=1	Medium					0.705491	0.700711	0.736411	-0.18275	-0.656098	-0.395007	1.69666	0.863679	0.393881	-0.148429	-0.224102	-0.352847				0.646362	-1.85613	1.31832	A0A287ELI3	0	0	0	0	0	0	1	0	0	0	0	0	0	0	0	0	-1	0	2	0	1	1	1	1
A0A287RZT3	Kinesin motor domain-containing protein OS=Hordeum vulgare subsp. vulgare OX=112509 PE=3 SV=1	Medium					1.63505	1.97141	0.977644	1.36699	1.41425	1.29667	1.0623	1.30766	1.11983	1.83944	3.06367	2.6567	3.9278	3.4384	2.11117	4.92301	4.71992	3.15499	A0A287RZT3	1	1	0	0	0	0	0	0	0	1	1	1	1	1	1	1	1	1	11	2	3	6	4	4
[truncated: 38 more rows]
[truncated: 4 more columns]
