# Supplementary material for: Global Proteome Profiling Revealed the Adaptive Reprogramming of Barley Flag Leaf to Drought and Elevated Temperature
Source: Cells. 2023 Jun 22;12(13):1685. doi: 10.3390/cells12131685 (PMC10340373; doi:10.3390/cells12131685)
Supplement: Supplementary file 1 [file cells-12-01685-s001.zip › Table S3.xlsx]

## Sheet: A
Table S3A. GO term overrepresentation for DEPs common between groups classified according to flag leaf size (S,M,L): fold enrichment, raw P-value, FDR, according to tools at geneontology.org (FDR < 0.05); number of mapped identifiers = 20 (out of 58)
GO category	GO term (GO identifier)	Fold enrichment	raw P-value	FDR
Biological process	negative regulation of proteolysis (GO:0045861)	> 100	2.71E-05	3.42E-02
	negative regulation of endopeptidase activity (GO:0010951)	> 100	2.71E-05	2.57E-02
	regulation of endopeptidase activity (GO:0052548)	> 100	2.71E-05	2.05E-02
	regulation of peptidase activity (GO:0052547)	> 100	2.71E-05	1.71E-02
	negative regulation of peptidase activity (GO:0010466)	> 100	2.71E-05	1.47E-02
	negative regulation of hydrolase activity (GO:0051346)	> 100	5.08E-05	2.41E-02
	pteridine-containing compound metabolic process (GO:0042558)	> 100	5.65E-05	2.38E-02
	biological_process (GO:0008150)	2.72	4.30E-06	1.63E-02
Molecular function	serine-type endopeptidase inhibitor activity (GO:0004867)	> 100	1.97E-05	4.04E-02
	peptidase inhibitor activity (GO:0030414)	> 100	5.65E-05	5.80E-02
	endopeptidase inhibitor activity (GO:0004866)	> 100	5.65E-05	3.87E-02
	endopeptidase regulator activity (GO:0061135)	> 100	6.24E-05	3.20E-02
	peptidase regulator activity (GO:0061134)	> 100	8.19E-05	3.36E-02

## Sheet: B
Table S3B. GO term overrepresentation for DEPs specific to HD: fold enrichment, raw P-value, FDR, according to tools at geneontology.org (FDR < 0.05); number of mapped identifiers = 15 (out of 62)
GO category	GO term (GO identifier)	Fold enrichment	raw P-value	FDR
Biological process	RNA splicing, via transesterification reactions with bulged adenosine as nucleophile (GO:0000377)	51.36	9.98E-07	3.78E-03
	RNA splicing, via transesterification reactions (GO:0000375)	51.36	9.98E-07	1.89E-03
	RNA splicing (GO:0008380)	46.81	1.43E-06	1.81E-03
	mRNA splicing, via spliceosome (GO:0000398)	39.16	5.98E-05	4.53E-02
	mRNA processing (GO:0006397)	30.59	1.23E-04	4.23E-02
	RNA processing (GO:0006396)	15.6	1.16E-04	4.90E-02
	gene expression (GO:0010467)	9.89	9.94E-05	5.38E-02
	heterocycle metabolic process (GO:0046483)	7.41	8.18E-05	5.17E-02
	cellular nitrogen compound metabolic process (GO:0034641)	7.23	1.91E-05	1.81E-02
	cellular aromatic compound metabolic process (GO:0006725)	7.07	1.06E-04	5.04E-02
	organic cyclic compound metabolic process (GO:1901360)	6.89	1.22E-04	4.63E-02

## Sheet: C
Table S3C. GO term overrepresentation for DEPs specific and common for time points (T1, T2): fold enrichment, raw P-value, FDR, according to tools at geneontology.org (FDR < 0.05)
Group of DEPs	GO category	GO term (GO identifier)	Fold enrichment	raw P-value	FDR
DEPs specific to T1*	Biological process	serine family amino acid catabolic process (GO:0009071)	> 100	5.12E-05	4.85E-02
		spliceosomal conformational changes to generate catalytic conformation (GO:0000393)	> 100	6.14E-05	4.65E-02
		carboxylic acid catabolic process (GO:0046395)	35.11	5.88E-06	2.23E-02
		organic acid catabolic process (GO:0016054)	31.33	9.11E-06	1.73E-02
		small molecule catabolic process (GO:0044282)	21.1	4.13E-05	5.22E-02
	Cellular component	post-mRNA release spliceosomal complex (GO:0071014)	> 100	1.76E-04	1.84E-02
		Prp19 complex (GO:0000974)	> 100	2.13E-04	1.98E-02
		small ribosomal subunit (GO:0015935)	22.46	3.46E-04	2.41E-02
		ribosomal subunit (GO:0044391)	13.95	2.94E-05	8.20E-03
		ribosome (GO:0005840)	12.24	5.42E-05	7.57E-03
		ribonucleoprotein complex (GO:1990904)	11.01	5.14E-07	4.30E-04
		cytosol (GO:0005829)	7.38	3.79E-05	6.35E-03
		protein-containing complex (GO:0032991)	4.18	3.37E-05	7.06E-03
		cytoplasm (GO:0005737)	2.9	2.83E-05	1.18E-02
		intracellular organelle (GO:0043229)	2.42	2.64E-04	2.21E-02
		organelle (GO:0043226)	2.42	2.65E-04	2.01E-02
		intracellular anatomical structure (GO:0005622)	2.3	9.08E-05	1.09E-02
		cellular anatomical entity (GO:0110165)	1.95	3.71E-04	2.39E-02
		cellular_component (GO:0005575)	1.92	6.98E-04	4.17E-02
DEPs specific to T2**	Cellular component	cytoplasm (GO:0005737)	2.51	6.14E-05	5.14E-02
		intracellular anatomical structure (GO:0005622)	2.11	1.03E-04	4.30E-02
DEPs shared between T1 and T2***	Biological process	positive regulation of cellular amide metabolic process (GO:0034250)	91.14	2.74E-04	4.95E-02
		positive regulation of translation (GO:0045727)	91.14	2.74E-04	4.72E-02
		regulation of translation (GO:0006417)	24.99	2.63E-04	5.55E-02
		regulation of cellular macromolecule biosynthetic process (GO:2000112)	24.72	2.72E-04	5.42E-02
		regulation of cellular amide metabolic process (GO:0034248)	24.72	2.72E-04	5.15E-02
		translation (GO:0006412)	15.63	3.42E-07	6.49E-04
		peptide biosynthetic process (GO:0043043)	15.49	3.62E-07	3.43E-04
		amide biosynthetic process (GO:0043604)	14.01	7.01E-07	4.43E-04
		peptide metabolic process (GO:0006518)	12.24	1.70E-06	6.43E-04
		cellular amide metabolic process (GO:0043603)	11.92	3.47E-07	4.39E-04
		cellular macromolecule biosynthetic process (GO:0034645)	9.7	7.63E-06	2.63E-03
		organonitrogen compound biosynthetic process (GO:1901566)	8.8	1.60E-07	6.07E-04
		cellular nitrogen compound biosynthetic process (GO:0044271)	8.37	1.10E-06	5.19E-04
		macromolecule biosynthetic process (GO:0009059)	6.99	6.07E-05	1.53E-02
		cellular biosynthetic process (GO:0044249)	5.92	5.33E-07	4.04E-04
		organic substance biosynthetic process (GO:1901576)	5.72	7.65E-07	4.14E-04
		biosynthetic process (GO:0009058)	5.47	1.22E-06	5.13E-04
		cellular nitrogen compound metabolic process (GO:0034641)	4.04	2.62E-05	8.28E-03
		organonitrogen compound metabolic process (GO:1901564)	3.19	1.29E-04	2.88E-02
		cellular metabolic process (GO:0044237)	2.58	1.23E-04	2.92E-02
		biological_process (GO:0008150)	1.99	5.65E-05	1.65E-02
	Molecular function	structural constituent of ribosome (GO:0003735)	13.66	8.29E-07	1.70E-03
		structural molecule activity (GO:0005198)	11.89	2.05E-06	2.10E-03
	Cellular component	ribosome (GO:0005840)	13.04	1.13E-06	9.42E-04
		cytosolic ribosome (GO:0022626)	12.6	3.05E-04	5.10E-02
		ribosomal subunit (GO:0044391)	10.61	1.13E-04	3.15E-02
		membrane protein complex (GO:0098796)	7.92	4.28E-04	4.48E-02
		ribonucleoprotein complex (GO:1990904)	6.28	3.76E-04	4.50E-02
		cytosol (GO:0005829)	5.61	2.32E-04	4.86E-02
		protein-containing complex (GO:0032991)	3.18	4.97E-04	4.62E-02
		cytoplasm (GO:0005737)	2.62	3.04E-05	1.27E-02
		intracellular anatomical structure (GO:0005622)	2.02	3.59E-04	5.00E-02
* number of mapped identifiers = 35 (out of 104)
** number of mapped identifiers = 45 (out of 157)
*** number of mapped identifiers = 46 (out of 152)
