# Supplementary material for: Global Proteome Profiling Revealed the Adaptive Reprogramming of Barley Flag Leaf to Drought and Elevated Temperature
Source: Cells. 2023 Jun 22;12(13):1685. doi: 10.3390/cells12131685 (PMC10340373; doi:10.3390/cells12131685)
Supplement: Supplementary file 1 [file cells-12-01685-s001.zip › Table S4.xlsx]

## Sheet: Arkusz1
Table S4. Pfam entries selected for interpretation together with regulation status of assigned DEPs in 18 defined comparisons
Pfam identifier	Pfam description	Pfam type	Interpro identifier	Protein FDR Confidence Combined	Identifier of assigned protein	Description of protein	Annotation			Pfam identifier(s) in annotation of protein	Gene symbol	Regulation status of selcted DEP in genotypes of different flag leaf size (S, M, L) in contrasts D, H, HD v. control attime points T1 and T2 [downregulation (-1), upregulation (1), no change (0)]																		Total number of significant contrasts	Number of significant contrasts in group
												Small						Medium						Large
												T1			T2			T1			T2			T1			T2
												D	H	HD	D	H	HD	D	H	HD	D	H	HD	D	H	HD	D	H	HD		Small	Medium	Large	D	H	HD	T1	T2
							Biological process	Cellular component	Molecular function
Pf00011	Hsp20/alpha crystallin family	domain	IPR002068	High	F2D9S4	Predicted protein OS=Hordeum vulgare subsp. vulgare OX=112509 PE=2 SV=1				Pf00011		0	0	0	0	0	0	0	0	0	0	0	1	0	0	0	0	0	0	1	0	1	0	0	0	1	0	1
Pf00011	Hsp20/alpha crystallin family	domain	IPR002068	High	M0UGW6	SHSP domain-containing protein OS=Hordeum vulgare subsp. vulgare OX=112509 PE=3 SV=1				Pf00011		0	0	0	0	0	0	0	0	0	0	0	0	0	0	0	0	0	-1	1	0	0	1	0	0	1	0	1
Pf00012	Hsp70 protein	family	IPR013126	High	F2D5G5	Predicted protein OS=Hordeum vulgare subsp. vulgare OX=112509 PE=2 SV=1	cell organization and biogenesis;metabolic process		nucleotide binding;protein binding	Pf00012,Pf06723		1	1	1	0	0	0	0	0	0	0	0	0	0	0	0	0	0	0	3	3	0	0	1	1	1	3	0
Pf00012	Hsp70 protein	family	IPR013126	High	F2E4C2	Predicted protein OS=Hordeum vulgare subsp. vulgare OX=112509 PE=2 SV=1	cell organization and biogenesis		nucleotide binding	Pf00012,Pf06723		0	0	0	0	0	1	0	0	0	0	0	1	0	0	0	0	0	1	3	1	1	1	0	0	3	0	3
Pf00012	Hsp70 protein	family	IPR013126	High	F2D884	Predicted protein OS=Hordeum vulgare subsp. vulgare OX=112509 PE=2 SV=1	cell organization and biogenesis		nucleotide binding	Pf00012,Pf06723		0	0	0	0	1	0	0	0	0	-1	0	0	1	0	0	0	0	0	3	1	1	1	2	1	0	1	2
Pf00036	EF hand	domain	IPR002048	High	M0Z828	Uncharacterized protein OS=Hordeum vulgare subsp. vulgare OX=112509 PE=4 SV=1			metal ion binding	Pf00036,Pf13202,Pf13405,Pf13499,Pf13833,Pf14658		0	0	0	1	0	1	0	0	0	1	0	1	1	0	1	0	0	0	6	2	2	2	3	0	3	2	4
Pf00036	EF hand	domain	IPR002048	High	F2DMV7	Predicted protein OS=Hordeum vulgare subsp. vulgare OX=112509 PE=2 SV=1	metabolic process		metal ion binding;RNA binding	Pf00036,Pf00153,Pf13202,Pf13405,Pf13499,Pf13833		0	0	0	0	0	0	0	0	0	0	0	0	0	0	0	0	0	-1	1	0	0	1	0	0	1	0	1
Pf00043	Glutathione S-transferase, C-terminal domain	domain	IPR004046	High	M0Y1I9	Uncharacterized protein OS=Hordeum vulgare subsp. vulgare OX=112509 PE=3 SV=1			protein binding	Pf00043,Pf13409,Pf13410,Pf13417,Pf14497		0	0	0	0	0	0	0	0	0	0	0	0	0	0	0	1	1	1	3	0	0	3	1	1	1	0	3
Pf00043	Glutathione S-transferase, C-terminal domain	domain	IPR004046	High	Q8VWW3	Glutathione transferase OS=Hordeum vulgare subsp. vulgare OX=112509 GN=GST6 PE=2 SV=1			catalytic activity;protein binding	Pf00043,Pf02798,Pf13409,Pf13410,Pf13417		0	0	0	0	1	0	0	0	0	0	0	0	0	0	0	1	1	0	3	1	0	2	1	2	0	0	3
Pf00070	Pyridine nucleotide-disulphide oxidoreductase	domain	IPR039648	High	F2E5U7	Dihydrolipoyl dehydrogenase OS=Hordeum vulgare subsp. vulgare OX=112509 PE=2 SV=1	cellular homeostasis;metabolic process;regulation of biological process		catalytic activity;nucleotide binding	Pf00070,Pf02852,Pf07992		0	0	0	0	0	0	0	0	0	0	0	0	1	0	0	0	0	0	1	0	0	1	1	0	0	1	0
Pf00070	Pyridine nucleotide-disulphide oxidoreductase	domain	IPR039648	High	A8CCK8	Glutathione reductase OS=Hordeum vulgare OX=4513 GN=HvGR2 PE=2 SV=1	cellular homeostasis;metabolic process;regulation of biological process		antioxidant activity;catalytic activity;nucleotide binding	Pf00070,Pf02852,Pf03486,Pf07992,Pf13434	GR2	0	0	0	0	0	0	0	0	0	0	0	1	0	0	0	0	-1	-1	3	0	1	2	0	1	2	0	3
Pf00183	Hsp90 protein	family	IPR001404	High	F2D2B6	Predicted protein OS=Hordeum vulgare subsp. vulgare OX=112509 PE=2 SV=1	metabolic process;response to stimulus		nucleotide binding;protein binding	Pf00183,Pf02518,Pf13589		0	0	0	-1	0	0	0	0	0	0	0	0	-1	0	0	-1	0	0	3	1	0	2	3	0	0	1	2
Pf00226	DnaJ domain	domain	IPR001623	High	F2DEL5	Predicted protein (Fragment) OS=Hordeum vulgare subsp. vulgare OX=112509 PE=2 SV=1	metabolic process;response to stimulus		metal ion binding;nucleotide binding;protein binding	Pf00226,Pf00684,Pf01556		0	0	0	0	0	0	0	0	0	0	0	1	1	1	0	1	1	1	6	0	1	5	2	2	2	2	4
Pf00318	Ribosomal protein S2	family	IPR001865	High	A0A218LNH5	30S ribosomal protein S2, chloroplastic OS=Hordeum vulgare OX=4513 GN=rps2 PE=3 SV=1	metabolic process	ribosome	structural molecule activity	Pf00318	rps2	0	0	0	0	0	0	0	0	0	0	0	0	0	0	-1	-1	0	-1	3	0	0	3	1	0	2	1	2
Pf00380	Ribosomal protein S9/S16	family	IPR000754	High	F2D355	Predicted protein OS=Hordeum vulgare subsp. vulgare OX=112509 PE=2 SV=1	metabolic process	ribosome	structural molecule activity	Pf00380		-1	0	0	0	0	0	0	0	0	0	0	0	0	0	0	0	0	1	2	1	0	1	1	0	1	1	1
Pf00466	Ribosomal protein L10	family	IPR001790	High	F2CUZ1	Predicted protein OS=Hordeum vulgare subsp. vulgare OX=112509 PE=2 SV=1				Pf00466		0	0	1	-1	0	-1	0	0	0	-1	0	0	1	1	0	1	0	0	7	3	1	3	4	1	2	3	4
Pf00515	Tetratricopeptide repeat	repeat	IPR001440	High	Q8W516	SGT1 OS=Hordeum vulgare OX=4513 GN=SGT1 PE=2 SV=1			protein binding	Pf00515,Pf04969,Pf05002,Pf07719,Pf12895,Pf13181,Pf13371,Pf13414,Pf13424,Pf13428,Pf13432,Pf14559	SGT1	-1	0	0	1	0	1	0	0	0	0	0	0	0	0	0	0	0	0	3	3	0	0	2	0	1	1	2
Pf00684	DnaJ central domain	domain	IPR001305	High	F2D2Q0	Predicted protein OS=Hordeum vulgare subsp. vulgare OX=112509 PE=2 SV=1			protein binding	Pf00684,Pf01471,Pf08823		0	0	0	0	1	1	0	0	0	0	0	0	0	-1	-1	-1	-1	-1	7	2	0	5	1	3	3	2	5
Pf00684	DnaJ central domain	domain	IPR001305	High	F2DEL5	Predicted protein (Fragment) OS=Hordeum vulgare subsp. vulgare OX=112509 PE=2 SV=1	metabolic process;response to stimulus		metal ion binding;nucleotide binding;protein binding	Pf00226,Pf00684,Pf01556		0	0	0	0	0	0	0	0	0	0	0	1	1	1	0	1	1	1	6	0	1	5	2	2	2	2	4
Pf01157	Ribosomal protein L21e	family	IPR001147	High	F2E2F1	Predicted protein OS=Hordeum vulgare subsp. vulgare OX=112509 PE=2 SV=1	metabolic process	ribosome	structural molecule activity	Pf01157		0	1	0	0	0	0	0	0	0	1	0	0	0	0	0	0	0	0	2	1	1	0	1	1	0	1	1
Pf01556	DnaJ C terminal domain	domain	IPR002939	High	F2DEL5	Predicted protein (Fragment) OS=Hordeum vulgare subsp. vulgare OX=112509 PE=2 SV=1	metabolic process;response to stimulus		metal ion binding;nucleotide binding;protein binding	Pf00226,Pf00684,Pf01556		0	0	0	0	0	0	0	0	0	0	0	1	1	1	0	1	1	1	6	0	1	5	2	2	2	2	4
Pf02798	Glutathione S-transferase, N-terminal domain	domain	IPR004045	High	Q3MUP2	Glutathione-S-transferase OS=Hordeum vulgare OX=4513 PE=2 SV=1			catalytic activity;protein binding	Pf02798,Pf13409,Pf13417	LOC732671	0	0	0	0	0	0	0	0	0	0	0	0	0	0	0	0	0	-1	1	0	0	1	0	0	1	0	1
Pf02798	Glutathione S-transferase, N-terminal domain	domain	IPR004045	High	Q8VWW3	Glutathione transferase OS=Hordeum vulgare subsp. vulgare OX=112509 GN=GST6 PE=2 SV=1			catalytic activity;protein binding	Pf00043,Pf02798,Pf13409,Pf13410,Pf13417		0	0	0	0	1	0	0	0	0	0	0	0	0	0	0	1	1	0	3	1	0	2	1	2	0	0	3
Pf02852	Pyridine nucleotide-disulphide oxidoreductase, dimerisation domain	domain	IPR004099	High	F2E5U7	Dihydrolipoyl dehydrogenase OS=Hordeum vulgare subsp. vulgare OX=112509 PE=2 SV=1	cellular homeostasis;metabolic process;regulation of biological process		catalytic activity;nucleotide binding	Pf00070,Pf02852,Pf07992		0	0	0	0	0	0	0	0	0	0	0	0	1	0	0	0	0	0	1	0	0	1	1	0	0	1	0
Pf02852	Pyridine nucleotide-disulphide oxidoreductase, dimerisation domain	domain	IPR004099	High	A8CCK8	Glutathione reductase OS=Hordeum vulgare OX=4513 GN=HvGR2 PE=2 SV=1	cellular homeostasis;metabolic process;regulation of biological process		antioxidant activity;catalytic activity;nucleotide binding	Pf00070,Pf02852,Pf03486,Pf07992,Pf13434	GR2	0	0	0	0	0	0	0	0	0	0	0	1	0	0	0	0	-1	-1	3	0	1	2	0	1	2	0	3
Pf04839	Plastid and cyanobacterial ribosomal protein (PSRP-3 / Ycf65)	family	IPR006924	High	M0W1G3	Uncharacterized protein OS=Hordeum vulgare subsp. vulgare OX=112509 PE=4 SV=1	metabolic process	ribosome	structural molecule activity	Pf04839		0	0	0	0	1	0	0	0	0	0	0	0	1	0	0	1	1	1	5	1	0	4	2	2	1	1	4
Pf07719	Tetratricopeptide repeat	repeat	IPR013105	High	Q8W516	SGT1 OS=Hordeum vulgare OX=4513 GN=SGT1 PE=2 SV=1			protein binding	Pf00515,Pf04969,Pf05002,Pf07719,Pf12895,Pf13181,Pf13371,Pf13414,Pf13424,Pf13428,Pf13432,Pf14559	SGT1	-1	0	0	1	0	1	0	0	0	0	0	0	0	0	0	0	0	0	3	3	0	0	2	0	1	1	2
Pf07992	Pyridine nucleotide-disulphide oxidoreductase	domain	IPR023753	High	F2E5U7	Dihydrolipoyl dehydrogenase OS=Hordeum vulgare subsp. vulgare OX=112509 PE=2 SV=1	cellular homeostasis;metabolic process;regulation of biological process		catalytic activity;nucleotide binding	Pf00070,Pf02852,Pf07992		0	0	0	0	0	0	0	0	0	0	0	0	1	0	0	0	0	0	1	0	0	1	1	0	0	1	0
Pf07992	Pyridine nucleotide-disulphide oxidoreductase	domain	IPR023753	High	A8CCK8	Glutathione reductase OS=Hordeum vulgare OX=4513 GN=HvGR2 PE=2 SV=1	cellular homeostasis;metabolic process;regulation of biological process		antioxidant activity;catalytic activity;nucleotide binding	Pf00070,Pf02852,Pf03486,Pf07992,Pf13434	GR2	0	0	0	0	0	0	0	0	0	0	0	1	0	0	0	0	-1	-1	3	0	1	2	0	1	2	0	3
Pf13181	Tetratricopeptide repeat	repeat	IPR019734	High	Q8W516	SGT1 OS=Hordeum vulgare OX=4513 GN=SGT1 PE=2 SV=1			protein binding	Pf00515,Pf04969,Pf05002,Pf07719,Pf12895,Pf13181,Pf13371,Pf13414,Pf13424,Pf13428,Pf13432,Pf14559	SGT1	-1	0	0	1	0	1	0	0	0	0	0	0	0	0	0	0	0	0	3	3	0	0	2	0	1	1	2
Pf13202	EF hand	domain	IPR002048	High	M0Z828	Uncharacterized protein OS=Hordeum vulgare subsp. vulgare OX=112509 PE=4 SV=1			metal ion binding	Pf00036,Pf13202,Pf13405,Pf13499,Pf13833,Pf14658		0	0	0	1	0	1	0	0	0	1	0	1	1	0	1	0	0	0	6	2	2	2	3	0	3	2	4
Pf13202	EF hand	domain	IPR002048	High	F2EJV2	Predicted protein OS=Hordeum vulgare subsp. vulgare OX=112509 PE=2 SV=1	cell organization and biogenesis;regulation of biological process	cytoskeleton	catalytic activity;metal ion binding;motor activity;protein binding	Pf01576,Pf03234,Pf05557,Pf06160,Pf12763,Pf13202,Pf13499,Pf13833		0	0	0	0	0	0	0	0	1	0	0	0	0	0	0	0	0	0	1	0	1	0	0	0	1	1	0
Pf13202	EF hand	domain	IPR002048	High	F2DMV7	Predicted protein OS=Hordeum vulgare subsp. vulgare OX=112509 PE=2 SV=1	metabolic process		metal ion binding;RNA binding	Pf00036,Pf00153,Pf13202,Pf13405,Pf13499,Pf13833		0	0	0	0	0	0	0	0	0	0	0	0	0	0	0	0	0	-1	1	0	0	1	0	0	1	0	1
Pf13371	Tetratricopeptide repeat	repeat		High	Q8W516	SGT1 OS=Hordeum vulgare OX=4513 GN=SGT1 PE=2 SV=1			protein binding	Pf00515,Pf04969,Pf05002,Pf07719,Pf12895,Pf13181,Pf13371,Pf13414,Pf13424,Pf13428,Pf13432,Pf14559	SGT1	-1	0	0	1	0	1	0	0	0	0	0	0	0	0	0	0	0	0	3	3	0	0	2	0	1	1	2
Pf13405	EF-hand domain	domain	IPR002048	High	M0Z828	Uncharacterized protein OS=Hordeum vulgare subsp. vulgare OX=112509 PE=4 SV=1			metal ion binding	Pf00036,Pf13202,Pf13405,Pf13499,Pf13833,Pf14658		0	0	0	1	0	1	0	0	0	1	0	1	1	0	1	0	0	0	6	2	2	2	3	0	3	2	4
Pf13405	EF-hand domain	domain	IPR002048	High	F2DMV7	Predicted protein OS=Hordeum vulgare subsp. vulgare OX=112509 PE=2 SV=1	metabolic process		metal ion binding;RNA binding	Pf00036,Pf00153,Pf13202,Pf13405,Pf13499,Pf13833		0	0	0	0	0	0	0	0	0	0	0	0	0	0	0	0	0	-1	1	0	0	1	0	0	1	0	1
Pf13409	Glutathione S-transferase, N-terminal domain	domain	IPR004045	High	Q3MUP2	Glutathione-S-transferase OS=Hordeum vulgare OX=4513 PE=2 SV=1			catalytic activity;protein binding	Pf02798,Pf13409,Pf13417	LOC732671	0	0	0	0	0	0	0	0	0	0	0	0	0	0	0	0	0	-1	1	0	0	1	0	0	1	0	1
Pf13409	Glutathione S-transferase, N-terminal domain	domain	IPR004045	High	M0Y1I9	Uncharacterized protein OS=Hordeum vulgare subsp. vulgare OX=112509 PE=3 SV=1			protein binding	Pf00043,Pf13409,Pf13410,Pf13417,Pf14497		0	0	0	0	0	0	0	0	0	0	0	0	0	0	0	1	1	1	3	0	0	3	1	1	1	0	3
Pf13409	Glutathione S-transferase, N-terminal domain	domain	IPR004045	High	Q8VWW3	Glutathione transferase OS=Hordeum vulgare subsp. vulgare OX=112509 GN=GST6 PE=2 SV=1			catalytic activity;protein binding	Pf00043,Pf02798,Pf13409,Pf13410,Pf13417		0	0	0	0	1	0	0	0	0	0	0	0	0	0	0	1	1	0	3	1	0	2	1	2	0	0	3
Pf13410	Glutathione S-transferase, C-terminal domain	domain		High	M0Y1I9	Uncharacterized protein OS=Hordeum vulgare subsp. vulgare OX=112509 PE=3 SV=1			protein binding	Pf00043,Pf13409,Pf13410,Pf13417,Pf14497		0	0	0	0	0	0	0	0	0	0	0	0	0	0	0	1	1	1	3	0	0	3	1	1	1	0	3
Pf13410	Glutathione S-transferase, C-terminal domain	domain		High	Q8VWW3	Glutathione transferase OS=Hordeum vulgare subsp. vulgare OX=112509 GN=GST6 PE=2 SV=1			catalytic activity;protein binding	Pf00043,Pf02798,Pf13409,Pf13410,Pf13417		0	0	0	0	1	0	0	0	0	0	0	0	0	0	0	1	1	0	3	1	0	2	1	2	0	0	3
Pf13417	Glutathione S-transferase, N-terminal domain	domain	IPR004045	High	Q3MUP2	Glutathione-S-transferase OS=Hordeum vulgare OX=4513 PE=2 SV=1			catalytic activity;protein binding	Pf02798,Pf13409,Pf13417	LOC732671	0	0	0	0	0	0	0	0	0	0	0	0	0	0	0	0	0	-1	1	0	0	1	0	0	1	0	1
Pf13417	Glutathione S-transferase, N-terminal domain	domain	IPR004045	High	M0Y1I9	Uncharacterized protein OS=Hordeum vulgare subsp. vulgare OX=112509 PE=3 SV=1			protein binding	Pf00043,Pf13409,Pf13410,Pf13417,Pf14497		0	0	0	0	0	0	0	0	0	0	0	0	0	0	0	1	1	1	3	0	0	3	1	1	1	0	3
Pf13417	Glutathione S-transferase, N-terminal domain	domain	IPR004045	High	Q8VWW3	Glutathione transferase OS=Hordeum vulgare subsp. vulgare OX=112509 GN=GST6 PE=2 SV=1			catalytic activity;protein binding	Pf00043,Pf02798,Pf13409,Pf13410,Pf13417		0	0	0	0	1	0	0	0	0	0	0	0	0	0	0	1	1	0	3	1	0	2	1	2	0	0	3
Pf13424	Tetratricopeptide repeat	repeat		High	Q8W516	SGT1 OS=Hordeum vulgare OX=4513 GN=SGT1 PE=2 SV=1			protein binding	Pf00515,Pf04969,Pf05002,Pf07719,Pf12895,Pf13181,Pf13371,Pf13414,Pf13424,Pf13428,Pf13432,Pf14559	SGT1	-1	0	0	1	0	1	0	0	0	0	0	0	0	0	0	0	0	0	3	3	0	0	2	0	1	1	2
Pf13428	Tetratricopeptide repeat	repeat		High	Q8W516	SGT1 OS=Hordeum vulgare OX=4513 GN=SGT1 PE=2 SV=1			protein binding	Pf00515,Pf04969,Pf05002,Pf07719,Pf12895,Pf13181,Pf13371,Pf13414,Pf13424,Pf13428,Pf13432,Pf14559	SGT1	-1	0	0	1	0	1	0	0	0	0	0	0	0	0	0	0	0	0	3	3	0	0	2	0	1	1	2
Pf13432	Tetratricopeptide repeat	repeat		High	Q8W516	SGT1 OS=Hordeum vulgare OX=4513 GN=SGT1 PE=2 SV=1			protein binding	Pf00515,Pf04969,Pf05002,Pf07719,Pf12895,Pf13181,Pf13371,Pf13414,Pf13424,Pf13428,Pf13432,Pf14559	SGT1	-1	0	0	1	0	1	0	0	0	0	0	0	0	0	0	0	0	0	3	3	0	0	2	0	1	1	2
Pf13499	EF-hand domain pair	domain	IPR002048	High	M0Z828	Uncharacterized protein OS=Hordeum vulgare subsp. vulgare OX=112509 PE=4 SV=1			metal ion binding	Pf00036,Pf13202,Pf13405,Pf13499,Pf13833,Pf14658		0	0	0	1	0	1	0	0	0	1	0	1	1	0	1	0	0	0	6	2	2	2	3	0	3	2	4
Pf13499	EF-hand domain pair	domain	IPR002048	High	F2EJV2	Predicted protein OS=Hordeum vulgare subsp. vulgare OX=112509 PE=2 SV=1	cell organization and biogenesis;regulation of biological process	cytoskeleton	catalytic activity;metal ion binding;motor activity;protein binding	Pf01576,Pf03234,Pf05557,Pf06160,Pf12763,Pf13202,Pf13499,Pf13833		0	0	0	0	0	0	0	0	1	0	0	0	0	0	0	0	0	0	1	0	1	0	0	0	1	1	0
Pf13499	EF-hand domain pair	domain	IPR002048	High	F2DMV7	Predicted protein OS=Hordeum vulgare subsp. vulgare OX=112509 PE=2 SV=1	metabolic process		metal ion binding;RNA binding	Pf00036,Pf00153,Pf13202,Pf13405,Pf13499,Pf13833		0	0	0	0	0	0	0	0	0	0	0	0	0	0	0	0	0	-1	1	0	0	1	0	0	1	0	1
Pf13833	EF-hand domain	domain	IPR039508	High	M0Z828	Uncharacterized protein OS=Hordeum vulgare subsp. vulgare OX=112509 PE=4 SV=1			metal ion binding	Pf00036,Pf13202,Pf13405,Pf13499,Pf13833,Pf14658		0	0	0	1	0	1	0	0	0	1	0	1	1	0	1	0	0	0	6	2	2	2	3	0	3	2	4
Pf13833	EF-hand domain	domain	IPR039508	High	F2EJV2	Predicted protein OS=Hordeum vulgare subsp. vulgare OX=112509 PE=2 SV=1	cell organization and biogenesis;regulation of biological process	cytoskeleton	catalytic activity;metal ion binding;motor activity;protein binding	Pf01576,Pf03234,Pf05557,Pf06160,Pf12763,Pf13202,Pf13499,Pf13833		0	0	0	0	0	0	0	0	1	0	0	0	0	0	0	0	0	0	1	0	1	0	0	0	1	1	0
Pf13833	EF-hand domain	domain	IPR039508	High	F2DMV7	Predicted protein OS=Hordeum vulgare subsp. vulgare OX=112509 PE=2 SV=1	metabolic process		metal ion binding;RNA binding	Pf00036,Pf00153,Pf13202,Pf13405,Pf13499,Pf13833		0	0	0	0	0	0	0	0	0	0	0	0	0	0	0	0	0	-1	1	0	0	1	0	0	1	0	1
Pf14497	Glutathione S-transferase, C-terminal domain	domain	IPR004046	High	M0Y1I9	Uncharacterized protein OS=Hordeum vulgare subsp. vulgare OX=112509 PE=3 SV=1			protein binding	Pf00043,Pf13409,Pf13410,Pf13417,Pf14497		0	0	0	0	0	0	0	0	0	0	0	0	0	0	0	1	1	1	3	0	0	3	1	1	1	0	3
Pf14559	Tetratricopeptide repeat	repeat		High	Q8W516	SGT1 OS=Hordeum vulgare OX=4513 GN=SGT1 PE=2 SV=1			protein binding	Pf00515,Pf04969,Pf05002,Pf07719,Pf12895,Pf13181,Pf13371,Pf13414,Pf13424,Pf13428,Pf13432,Pf14559	SGT1	-1	0	0	1	0	1	0	0	0	0	0	0	0	0	0	0	0	0	3	3	0	0	2	0	1	1	2
Pf14658	EF-hand domain	domain	IPR039508	High	M0Z828	Uncharacterized protein OS=Hordeum vulgare subsp. vulgare OX=112509 PE=4 SV=1			metal ion binding	Pf00036,Pf13202,Pf13405,Pf13499,Pf13833,Pf14658		0	0	0	1	0	1	0	0	0	1	0	1	1	0	1	0	0	0	6	2	2	2	3	0	3	2	4
