# Supplementary material for: Global Proteome Profiling Revealed the Adaptive Reprogramming of Barley Flag Leaf to Drought and Elevated Temperature
Source: Cells. 2023 Jun 22;12(13):1685. doi: 10.3390/cells12131685 (PMC10340373; doi:10.3390/cells12131685)
Supplement: Supplementary file 1 [file cells-12-01685-s001.zip › Table S5.xlsx]

## Sheet: A
Table S5A. Regulation status of differentially expressed proteins along with expression of assigned genes in genotypes of different flag leaf size (small, medium, large) under drought (D), heat (H) and their combination (HD) at two time points (T1 and T2)
Protein identifier	Annotation			Pfam identifier(s)	Regulation status of DEPs in contrasts D, H, HD v. control [downregulation (-1), upregulation (1), no change (0)]																		Number of significant contrasts in group								Total number of significant contrasts for protein	Gene identifier according to genome assembly version		Gene description	UniProt_SwissProt	UniProt_TrEMBL	Interpro	Gene annotation (GO categores: P - biological process, F - molecular function, C - cellular component)	Ortholog	Regulation status of DEGs in contrasts D, H, HD v. control [downregulation (-1), upregulation (1), no change (0)]
	Biological process	Cellular component	Molecular function
					Small						Medium						Large																							Small						Medium
					T1			T2			T1			T2			T1			T2																				T1			T2			T1			T2
					D	H	HD	D	H	HD	D	H	HD	D	H	HD	D	H	HD	D	H	HD	Small	Medium	Large	D	H	HD	T1	T2										D	H	HD	D	H	HD	D	H	HD	D
																																HORVUv1	HORVUv3 (HORVU.MOREX)
A0A218LNI3	metabolic process;transport	membrane	catalytic activity;metal ion binding	Pf00124	0	0	0	0	0	0	0	0	0	0	0	0	0	0	0	0	0	-1	0	0	1	0	0	1	0	1	1	AGP50740		photosystem II protein D2	P11849	A0A218LNI3;S4Z1W0	IPR000484|Photosynthetic reaction centre, L/M;IPR005868|Photosystem II D2 protein;IPR036854|Photosystem II protein D1/D2 superfamily	C:chloroplast;C:chloroplast thylakoid membrane;C:integral component of membrane;C:membrane;C:photosystem II;C:plastid;C:thylakoid;F:chlorophyll binding;F:electron transfer activity;F:electron transporter, transferring electrons within the cyclic electron transport pathway of photosynthesis activity;F:iron ion binding;F:metal ion binding;F:oxidoreductase activity;P:oxidation-reduction process;P:ph…	ATCG00270_PSBD	0	0	0	0	0	0	0	0	0	0
P60161	metabolic process;transport	membrane	catalytic activity;metal ion binding	Pf00033, Pf13631	0	0	0	0	0	0	0	0	0	0	0	0	0	0	0	0	0	-1	0	0	1	0	0	1	0	1	1	AGP50784		cytochrome b6	P60161	A0A218LNJ7;S4YYM1	IPR005797|Cytochrome b/b6, N-terminal;IPR016174|Di-haem cytochrome, transmembrane;IPR023530|Cytochrome b6, PetB;IPR027387|Cytochrome b/b6-like domain superfamily	C:chloroplast;C:chloroplast thylakoid membrane;C:integral component of membrane;C:membrane;C:plastid;C:thylakoid;F:electron transfer activity;F:electron transporter, transferring electrons within cytochrome b6/f complex of photosystem II activity;F:heme binding;F:iron ion binding;F:metal ion binding;F:oxidoreductase activity;P:electron transport chain;P:oxidation-reduction process;P:photosynthesi…	ATCG00720_PETB	0	0	0	0	0	0	0	0	0	0
A1E9M6	metabolic process	ribosome	RNA binding;structural molecule activity	Pf00410	0	0	0	0	0	0	0	0	0	0	0	0	1	0	0	0	0	0	0	0	1	1	0	0	1	0	1	AGP50790		ribosomal protein S8	A1E9M6	A0A218LNC6;S4Z200	IPR000630|Ribosomal protein S8;IPR035987|Ribosomal protein S8 superfamily	C:chloroplast;C:cytosolic small ribosomal subunit;C:plastid;C:ribosome;F:RNA binding;F:rRNA binding;F:structural constituent of ribosome;P:translation	ATCG00770_RPS8	0	0	0	0	0	0	0	0	0	0
S4Z1A6	metabolic process	ribosome	RNA binding;structural molecule activity	Pf00238	0	0	0	0	-1	0	0	0	0	-1	0	0	0	0	0	0	0	0	1	1	0	1	1	0	0	2	2	AGP50791		ribosomal protein L14	A1E9M7	S4Z1A6	IPR000218|Ribosomal protein L14P;IPR005745|Ribosomal protein L14P, bacterial-type;IPR019972|Ribosomal protein L14P, conserved site;IPR036853|Ribosomal protein L14 superfamily	C:chloroplast;C:large ribosomal subunit;C:mitochondrial large ribosomal subunit;C:plastid;C:ribosome;F:large ribosomal subunit rRNA binding;F:RNA binding;F:rRNA binding;F:structural constituent of ribosome;P:translation	ATCG00780_RPL14	0	0	0	0	0	-1	0	0	0	0
A0A287DTW3					0	0	0	0	0	-1	0	-1	0	0	0	0	0	0	0	-1	-1	-1	1	1	3	1	2	2	1	4	5	HORVU0Hr1G000760	HORVU.MOREX.r3.1HG0067190		NA	A0A287DTW3	IPR000877|Proteinase inhibitor I12, Bowman-Birk	C:extracellular region;F:serine-type endopeptidase inhibitor activity;P:negative regulation of endopeptidase activity		0	0	0	1	0	0	0	0	0	1
A0A287DUE7					0	0	0	0	0	0	0	0	0	-1	0	0	1	0	0	0	0	0	0	1	1	2	0	0	1	1	2	HORVU0Hr1G001490			P20143	A0A287DUE7;F2D2W8;M0WPH0	IPR004928|Photosystem I PsaH, reaction centre subunit VI	C:chloroplast;C:chloroplast thylakoid membrane;C:integral component of membrane;C:membrane;C:photosystem I;C:photosystem I reaction center;C:plastid;C:thylakoid;P:photosynthesis		0	0	0	-1	0	-1	0	0	0	0
M0Z065	metabolic process		catalytic activity;nucleotide binding	Pf00478, Pf00977, Pf01070, Pf01645, Pf03060	0	0	0	0	0	0	0	0	0	0	0	0	1	1	1	1	1	0	0	0	5	2	2	1	3	2	5	HORVU0Hr1G013900	HORVU.MOREX.r3.5HG0516760		NA	A0A287E133;A0A287E136;A0A287E141;A0A287E157;A0A287E159;A0A287E162;A0A287E164;A0A287E167;A0A287E170;A0A287E173;A0A287E175;M0Z065;M0Z066	IPR000262|FMN-dependent dehydrogenase;IPR008259|FMN-dependent alpha-hydroxy acid dehydrogenase, active site;IPR012133|Alpha-hydroxy acid dehydrogenase, FMN-dependent;IPR013785|Aldolase-type TIM barrel;IPR037396|FMN hydroxy acid dehydrogenase domain	C:integral component of membrane;C:membrane;C:peroxisome;F:catalytic activity;F:FMN binding;F:glycolate oxidase activity;F:L-lactate dehydrogenase activity;F:oxidoreductase activity;P:lactate oxidation;P:modulation by virus of host morphology or physiology;P:oxidation-reduction process;P:photorespiration;P:regulation of photosynthesis	AT3G14415_;AT3G14420_GLO1;AT4G18360_GLO5	0	0	0	0	0	0	0	0	0	0
M0Y9X7	metabolic process	cytoplasm	catalytic activity;nucleotide binding;RNA binding	Pf00009, Pf03143, Pf03144	0	0	0	0	0	0	0	0	0	0	0	0	1	0	0	0	0	0	0	0	1	1	0	0	1	0	1	HORVU0Hr1G017020	HORVU.MOREX.r3.2HG0107900	Elongation factor 1-alpha	P34824;Q40034	A0A287E3V3;A0A287E3V5;A0A287E3W5;M0Y9X7	IPR000795|Transcription factor, GTP-binding domain;IPR004160|Translation elongation factor EFTu/EF1A, C-terminal;IPR004161|Translation elongation factor EFTu-like, domain 2;IPR004539|Translation elongation factor EF1A, eukaryotic/archaeal;IPR009000|Translation protein, beta-barrel domain superfamily;IPR009001|Translation elongation factor EF1A/initiation factor IF2gamma, C-terminal;IPR027417|P-lo…	C:cytoplasm;F:GTP binding;F:GTPase activity;F:nucleotide binding;F:translation elongation factor activity;P:translation;P:translational elongation	AT1G07920_A1;AT1G07930_A1;AT1G07940_A1;AT1G35550_;AT5G60390_A1	0	0	0	0	0	0	0	0	0	0
A0A287E4C0					0	0	0	0	0	0	0	0	0	-1	0	0	1	1	1	1	1	1	0	1	6	3	2	2	3	4	7	HORVU0Hr1G017370	HORVU.MOREX.r3.6HG0624630	Aspartate aminotransferase	NA	A0A287E4C0;A0A287E4C6;A0A287E4C9;A0A287E4D8;A0A287E4D9;M0V0J0	IPR000796|Aspartate/other aminotransferase;IPR004838|Aminotransferases, class-I, pyridoxal-phosphate-binding site;IPR004839|Aminotransferase, class I/classII;IPR015421|Pyridoxal phosphate-dependent transferase, major domain;IPR015422|Pyridoxal phosphate-dependent transferase domain 1;IPR015424|Pyridoxal phosphate-dependent transferase	C:apoplast;C:chloroplast;C:chloroplast envelope;C:chloroplast stroma;C:plastid;F:catalytic activity;F:L-aspartate:2-oxoglutarate aminotransferase activity;F:pyridoxal phosphate binding;F:transaminase activity;F:transferase activity;P:biosynthetic process;P:cellular amino acid metabolic process;P:response to cadmium ion;P:response to cold	AT4G31990_ASP5	0	0	0	0	0	0	0	0	0	0
A8CCK8	cellular homeostasis;metabolic process;regulation of biological process		antioxidant activity;catalytic activity;nucleotide binding	Pf00070, Pf02852, Pf03486, Pf07992, Pf13434	0	0	0	0	0	0	0	0	0	0	0	1	0	0	0	0	-1	-1	0	1	2	0	1	2	0	3	3	HORVU0Hr1G017540	HORVU.MOREX.r3.6HG0628590		NA	A0A287E4G6;A0A287E4H0;A0A287E4H1;A0A287E4H3;A0A287E4H6;A0A287E4H8;A0A287E4H9;A0A287E4I3;A0A287E4I4;A0A287E4I9;A8CCK8;F2DDA7;Q8LPA9	IPR012999|Pyridine nucleotide-disulphide oxidoreductase, class I, active site;IPR023753|FAD/NAD(P)-binding domain;IPR036188|FAD/NAD(P)-binding domain superfamily;|	C:cell;F:electron transfer activity;F:flavin adenine dinucleotide binding;F:glutathione-disulfide reductase activity;F:NADP binding;F:nucleotide binding;F:oxidoreductase activity;F:oxidoreductase activity, acting on a sulfur group of donors, NAD(P) as acceptor;P:cell redox homeostasis;P:cellular oxidant detoxification;P:electron transport chain;P:glutathione metabolic process;P:oxidation-reductio…	AT3G24170_ATGR1	0	0	0	0	0	0	0	0	0	0
A0A287EA30					0	0	0	0	0	0	0	0	0	0	0	0	-1	-1	0	0	-1	0	0	0	3	1	2	0	2	1	3	HORVU0Hr1G030120	HORVU.MOREX.r3.5HG0474770		NA	A0A287EA02;A0A287EA30;A0A287EA45;A0A287EA47	IPR029669|Proton pump-interactor	C:endoplasmic reticulum;C:integral component of membrane;C:membrane;C:plasma membrane;P:regulation of proton transport	AT1G53110_PPI4;AT3G15340_PPI2;AT4G27500_PPI1;AT5G36690_PPI3A;AT5G36780_PPI3A	0	0	0	0	0	0	0	0	0	0
A0A287EBD3					-1	0	0	0	0	0	0	0	-1	0	0	0	1	0	1	0	-1	-1	1	1	4	2	1	3	4	2	6	HORVU0Hr1G034830		Ribosomal protein S7	NA	A0A287EBD3	IPR000235|Ribosomal protein S5/S7;IPR005717|Ribosomal protein S7, bacterial/organellar-type;IPR020606|Ribosomal protein S7, conserved site;IPR023798|Ribosomal protein S7 domain;IPR036823|Ribosomal protein S7 domain superfamily	C:ribosome;C:small ribosomal subunit;F:mRNA binding;F:RNA binding;F:rRNA binding;F:structural constituent of ribosome;P:ribosomal small subunit assembly;P:translation	ATCG00900_RPS7-A;ATCG01240_RPS7-A	0	0	0	0	0	0	0	0	0	0
A0A287EE97					0	0	0	0	0	0	0	0	0	0	0	0	0	1	0	0	0	0	0	0	1	0	1	0	1	0	1	HORVU1Hr1G000020	HORVU.MOREX.r3.1HG0000040		NA	A0A287EE50;A0A287EE56;A0A287EE76;A0A287EE79;A0A287EE81;A0A287EE83;A0A287EE92;A0A287EE97;A0A287EEA0;A0A287EEC3	IPR006785|Peroxisome membrane anchor protein Pex14p, N-terminal;IPR025655|Peroxisomal membrane protein 14;IPR036388|Winged helix-like DNA-binding domain superfamily;|	C:integral component of membrane;C:membrane;C:peroxisomal importomer complex;C:peroxisomal membrane;F:protein binding;F:signaling receptor binding;P:protein import into peroxisome matrix, docking		0	0	0	0	0	0	0	0	0	0
A0A287EJH4					0	1	0	0	0	0	0	0	0	0	0	0	0	0	0	0	0	0	1	0	0	0	1	0	1	0	1	HORVU1Hr1G006860	HORVU.MOREX.r3.1HG0007200	Glucose-6-phosphate isomerase	NA	A0A287EJG5;A0A287EJG9;A0A287EJH0;A0A287EJH4;A0A287EJH7;A0A287EJI0;A0A287EJI6;A0A287EJJ1;A0A287EJK8;A0A287EJL4;Q1PBI4	IPR001672|Phosphoglucose isomerase (PGI);IPR018189|Phosphoglucose isomerase, conserved site;IPR023096|Phosphoglucose isomerase, C-terminal;IPR035476|Phosphoglucose isomerase, SIS domain 1;IPR035482|Phosphoglucose isomerase, SIS domain 2	C:cytosol;C:integral component of membrane;C:membrane;F:glucose-6-phosphate isomerase activity;F:intramolecular transferase activity;F:isomerase activity;F:monosaccharide binding;P:gluconeogenesis;P:glucose 6-phosphate metabolic process;P:glycolytic process	AT5G42740_PGIC	0	0	0	0	0	0	0	0	0	0
A0A287EKM8					0	0	0	0	0	0	0	0	0	0	0	0	0	0	-1	0	0	0	0	0	1	0	0	1	1	0	1	HORVU1Hr1G008330	HORVU.MOREX.r3.1HG0008650		NA	A0A287EKJ9;A0A287EKK0;A0A287EKK4;A0A287EKK9;A0A287EKL1;A0A287EKM7;A0A287EKM8;A0A287EKN7;M0VZC1;M0VZC2	IPR006156|Dihydroneopterin aldolase;IPR006157|Dihydroneopterin aldolase/epimerase domain;IPR007275|YTH domain	F:dihydroneopterin aldolase activity;F:lyase activity;F:RNA binding;P:folic acid biosynthetic process;P:folic acid-containing compound metabolic process;P:tetrahydrofolate biosynthetic process	AT3G13060_ECT5;AT5G58190_ECT10	0	0	0	0	0	0	0	0	0	0
A0A287ELI3					0	0	0	0	0	0	1	0	0	0	0	0	0	0	0	0	-1	0	0	1	1	1	1	0	1	1	2	HORVU1Hr1G009640	HORVU.MOREX.r3.1HG0010170		NA	A0A287ELI2;A0A287ELI3;F2DXT0	|	C:integral component of membrane;C:membrane		0	0	0	0	0	0	0	0	0	0
Q8VWW3			catalytic activity;protein binding	Pf00043, Pf02798, Pf13409, Pf13410, Pf13417	0	0	0	0	1	0	0	0	0	0	0	0	0	0	0	1	1	0	1	0	2	1	2	0	0	3	3	HORVU1Hr1G017050	HORVU.MOREX.r3.1HG0017720		NA	A0A287ERH3;A0A287ERI0;A0A287ERI7;A0A287ERJ5;Q8VWW3	IPR004045|Glutathione S-transferase, N-terminal;IPR004046|Glutathione S-transferase, C-terminal;IPR010987|Glutathione S-transferase, C-terminal-like;IPR034347|Glutathione S-transferases Phi, C-terminal;IPR036249|Thioredoxin-like superfamily;IPR036282|Glutathione S-transferase, C-terminal domain superfamily;IPR040079|Glutathione Transferase family	C:cytoplasm;F:glutathione binding;F:glutathione transferase activity;F:protein binding;F:transferase activity;P:glutathione metabolic process		0	0	0	0	0	0	0	0	0	0
F2DIR3	metabolic process	ribosome	RNA binding;structural molecule activity	Pf00900, Pf01479, Pf08071	0	0	0	0	0	0	0	0	0	-1	0	0	0	0	0	0	0	0	0	1	0	1	0	0	0	1	1	HORVU1Hr1G021720		40S ribosomal protein S4	NA	A0A287EVG1;A0A287EVG4;A0A287EVG8;A0A287EVH7;F2DIR3	IPR000876|Ribosomal protein S4e;IPR002942|RNA-binding S4 domain;IPR005824|KOW;IPR013843|Ribosomal protein S4e, N-terminal;IPR013845|Ribosomal protein S4e, central region;IPR014722|Ribosomal protein L2, domain 2;IPR018199|Ribosomal protein S4e, N-terminal, conserved site;IPR032277|40S ribosomal protein S4, C-terminal domain;IPR038237|Ribosomal protein S4e, central domain superfamily;IPR041982|Ribo…	C:cytosolic small ribosomal subunit;C:intracellular;C:ribosome;F:RNA binding;F:rRNA binding;F:structural constituent of ribosome;P:translation	AT2G17360_RPS4A;AT5G07090_RPS4B;AT5G58420_RPS4D	0	0	0	0	0	0	0	0	0	0
A0A287EWN1					0	0	0	1	0	1	0	0	0	0	0	1	0	0	0	0	0	1	2	1	1	1	0	3	0	4	4	HORVU1Hr1G022700	HORVU.MOREX.r3.1HG0023950	Predicted protein	NA	A0A287EWK0;A0A287EWK5;A0A287EWL3;A0A287EWL4;A0A287EWL7;A0A287EWL8;A0A287EWL9;A0A287EWM3;A0A287EWN1;F2DI47	IPR001075|NIF system FeS cluster assembly, NifU, C-terminal;IPR014824|Scaffold protein Nfu/NifU, N-terminal;IPR034904|Fe-S cluster assembly domain superfamily;IPR035433|NFU1-like;IPR036498|Scaffold protein Nfu/NifU, N-terminal domain superfamily	C:mitochondrion;F:4 iron, 4 sulfur cluster binding;F:iron ion binding;F:iron-sulfur cluster binding;P:iron-sulfur cluster assembly;P:protein maturation by iron-sulfur cluster transfer	AT1G51390_NIFU5;AT3G20970_NIFU4
A0A287EWW0					0	0	0	0	0	0	0	0	0	0	0	0	0	0	0	0	0	-1	0	0	1	0	0	1	0	1	1	HORVU1Hr1G022990	HORVU.MOREX.r3.1HG0024210		NA	A0A287EWU0;A0A287EWV3;A0A287EWV4;A0A287EWW0	IPR001623|DnaJ domain;IPR002939|Chaperone DnaJ, C-terminal;IPR008971|HSP40/DnaJ peptide-binding;IPR018253|DnaJ domain, conserved site;IPR036869|Chaperone J-domain superfamily	C:endoplasmic reticulum;C:endoplasmic reticulum lumen;C:plasma membrane;F:unfolded protein binding;P:pattern recognition receptor signaling pathway;P:protein folding	AT3G62600_ERDJ3B	0	0	0	0	0	0	0	0	0	0
A0A287EXP7					0	0	0	0	0	0	0	1	0	0	0	0	0	0	0	0	0	0	0	1	0	0	1	0	1	0	1	HORVU1Hr1G024140	HORVU.MOREX.r3.1HG0025440		NA	A0A287EXP7;A0A287EXQ0;A0A287EXQ6;A0A287EXQ9;A0A287EXR3	IPR003195|Transcription initiation factor IID, subunit 13;IPR009072|Histone-fold;|	C:transcription factor TFIID complex;F:DNA binding;F:protein heterodimerization activity;F:transcription coregulator activity;P:regulation of transcription by RNA polymerase II;P:transcription by RNA polymerase II	AT1G02680_TAF13	0	0	0	0	0	0	0	0	0	0
A0A287EZP5					0	0	0	0	0	0	0	0	0	0	0	0	-1	0	0	0	0	0	0	0	1	1	0	0	1	0	1	HORVU1Hr1G027420	HORVU.MOREX.r3.1HG0029060		NA	A0A287EZN4;A0A287EZP5;A0A287EZP7;A0A287EZQ9	IPR013126|Heat shock protein 70 family;IPR029047|Heat shock protein 70kD, peptide-binding domain superfamily;IPR029048|Heat shock protein 70kD, C-terminal domain superfamily	C:cytosol;C:nucleus;F:ATP binding	AT1G79920_;AT1G79930_HSP70-14	0	0	0	0	0	0	0	0	0	0
A0A287F007					0	0	0	-1	0	0	0	0	0	0	0	0	0	0	0	0	0	-1	1	0	1	1	0	1	0	2	2	HORVU1Hr1G027840	HORVU.MOREX.r3.1HG0029490		NA	A0A287F006;A0A287F007	IPR004360|Glyoxalase/fosfomycin resistance/dioxygenase domain;IPR029068|Glyoxalase/Bleomycin resistance protein/Dihydroxybiphenyl dioxygenase;IPR037523|Vicinal oxygen chelate (VOC) domain	C:chloroplast	AT5G57040_	0	0	0	0	0	0	0	0	0	0
A0A287F3X4					0	0	0	0	0	1	0	0	0	0	0	0	0	0	0	0	0	0	1	0	0	0	0	1	0	1	1	HORVU1Hr1G034630	HORVU.MOREX.r3.1HG0036480		NA	A0A287F3W1;A0A287F3W5;A0A287F3W6;A0A287F3W7;A0A287F3X1;A0A287F3X2;A0A287F3X3;A0A287F3X4;A0A287F3X8;A0A287F3Y4;A0A287F3Y6;F2ECX9	IPR008851|Transcription initiation factor IIF, alpha subunit;IPR011039|Transcription Factor IIF, Rap30/Rap74, interaction;IPR036388|Winged helix-like DNA-binding domain superfamily;IPR036390|Winged helix DNA-binding domain superfamily	C:nucleus;F:DNA binding;P:positive regulation of transcription elongation from RNA polymerase II promoter;P:transcription initiation from RNA polymerase II promoter		0	0	0	0	0	0	0	0	0	0
A0A287F4U4					0	0	0	1	0	0	0	0	0	1	0	1	0	0	0	0	0	1	1	2	1	2	0	2	0	4	4	HORVU1Hr1G036220			NA	A0A287F4U4	IPR021109|Aspartic peptidase domain superfamily
F2E2F1	metabolic process	ribosome	structural molecule activity	Pf01157	0	1	0	0	0	0	0	0	0	1	0	0	0	0	0	0	0	0	1	1	0	1	1	0	1	1	2	HORVU1Hr1G038890		Predicted protein	NA	F2E2F1	IPR001147|Ribosomal protein L21e;IPR008991|Translation protein SH3-like domain superfamily;IPR018259|Ribosomal protein L21e, conserved site;IPR036948|Ribosomal protein L21 superfamily	C:cytosolic large ribosomal subunit;C:intracellular;C:ribosome;F:structural constituent of ribosome;P:translation	AT1G09590_RPL21A;AT1G09690_RPL21A;AT1G57660_RPL21E;AT1G57860_RPL21E	0	0	0	0	0	0	0	0	0	0
M0UZA5	metabolic process		catalytic activity;DNA binding	Pf02560	0	0	0	1	0	1	0	0	0	0	0	1	0	0	0	0	0	1	2	1	1	1	0	3	0	4	4	HORVU1Hr1G039870	HORVU.MOREX.r3.1HG0041820	Cyanate hydratase	NA	A0A287F824;A0A287F826;A0A287F838;A0A287F840;A0A287F871;M0UZA5	IPR003712|Cyanate lyase, C-terminal;IPR008076|Cyanate hydratase;IPR010982|Lambda repressor-like, DNA-binding domain superfamily;IPR036581|Cyanate lyase, C-terminal domain superfamily	F:cyanate hydratase activity;F:DNA binding;F:lyase activity;P:cyanate metabolic process		0	0	0	0	0	0	0	0	0	0
A0A287FCC2					0	0	1	0	0	0	0	0	0	0	0	0	0	0	0	0	0	0	1	0	0	0	0	1	1	0	1	HORVU1Hr1G043940	HORVU.MOREX.r3.1HG0046280		NA	A0A287FCA9;A0A287FCB0;A0A287FCB4;A0A287FCB5;A0A287FCC2;A0A287FCC3;A0A287FCC7;A0A287FCC8;A0A287FCE0	IPR031610|Protein TIC110, chloroplastic;|	C:chloroplast;C:chloroplast envelope;C:membrane;C:plastid;C:TOC-TIC supercomplex I;P:chloroplast organization;P:protein import into chloroplast stroma	AT1G06950_TIC110	0	0	0	0	0	0	0	0	0	0
F2DY13		membrane	metal ion binding	Pf00173	0	0	0	1	0	1	0	0	0	1	0	1	0	0	0	0	0	0	2	2	0	2	0	2	0	4	4	HORVU1Hr1G047990			NA	A0A287FFW7;A0A287FFW8;A0A287FFX9;A0A287FFY4;F2DY13	IPR001199|Cytochrome b5-like heme/steroid binding domain;IPR018506|Cytochrome b5, heme-binding site;IPR036400|Cytochrome b5-like heme/steroid binding domain superfamily;|	C:chloroplast thylakoid membrane;C:endoplasmic reticulum;C:integral component of membrane;C:membrane;C:plasma membrane;C:vacuolar membrane;C:vacuole;F:heme binding;F:metal ion binding	AT5G53560_CYTB5-E
A0A287FIQ8					0	0	0	1	0	1	0	0	0	0	0	0	0	0	0	0	0	1	2	0	1	1	0	2	0	3	3	HORVU1Hr1G050740	HORVU.MOREX.r3.1HG0053360		NA	A0A287FIP8;A0A287FIQ2;A0A287FIQ8;A0A287FIT6;M0Z0W7	IPR019377|NADH-ubiquinone oxidoreductase, subunit 10;IPR020163|Complex I subunit NDUFS6;IPR039993|NADH dehydrogenase [ubiquinone] 1 beta subcomplex subunit 10	C:mitochondrial respiratory chain complex I	AT1G49140_;AT3G18410_	0	0	0	0	0	0	0	0	0	0
Q8GT52	transport	membrane	transporter activity	Pf00083, Pf06609, Pf07690, Pf13347	0	0	0	0	0	0	0	0	0	0	0	0	-1	0	0	-1	0	-1	0	0	3	2	0	1	1	2	3	HORVU1Hr1G052040	HORVU.MOREX.r3.1HG0054530		NA	A0A287FKA5;A0A287FKD6;M0WQP8;Q8GT51;Q8GT52	IPR003663|Sugar/inositol transporter;IPR005828|Major facilitator, sugar transporter-like;IPR005829|Sugar transporter, conserved site;IPR020846|Major facilitator superfamily domain;IPR036259|MFS transporter superfamily;|	C:integral component of membrane;C:integral component of plasma membrane;C:membrane;F:carbohydrate:proton symporter activity;F:transmembrane transporter activity;F:transporter activity;P:carbohydrate transport;P:glucose import;P:proton transmembrane transport;P:transmembrane transport	AT1G20840_MSSP1;AT3G51490_TMT3;AT4G35300_TMT2	0	0	0	0	0	0	0	0	0	0
A0A287FRQ6					0	0	0	0	0	0	0	0	0	0	0	1	-1	0	0	0	0	0	0	1	1	1	0	1	1	1	2	HORVU1Hr1G057660	HORVU.MOREX.r3.1HG0059430		NA	A0A287FRQ3;A0A287FRQ4;A0A287FRQ6;A0A287FRQ7;F2D189	IPR000504|RNA recognition motif domain;IPR012677|Nucleotide-binding alpha-beta plait domain superfamily;IPR035979|RNA-binding domain superfamily	C:nucleus;C:ribonucleoprotein complex;F:nucleic acid binding;F:RNA binding;P:regulation of RNA metabolic process	AT3G08000_	0	0	0	0	0	0	0	0	0	0
Q7DM44	metabolic process		catalytic activity	Pf00332	0	0	0	1	0	0	0	0	0	0	0	0	1	1	1	0	0	0	1	0	3	2	1	1	3	1	4	HORVU1Hr1G057680	HORVU.MOREX.r3.1HG0059470		P12257	A0A287FRQ8;A0A287FRR1;A0A287FRR2;A0A287FRR3;A0A287FRS5;M0XT04;Q02345;Q7DM44	IPR000490|Glycoside hydrolase family 17;IPR017853|Glycoside hydrolase superfamily	C:anchored component of plasma membrane;F:hydrolase activity;F:hydrolase activity, acting on glycosyl bonds;F:hydrolase activity, hydrolyzing O-glycosyl compounds;F:licheninase activity;P:carbohydrate metabolic process;P:metabolic process		0	0	0	0	0	0	0	0	0	0
M0WPZ4		nucleus		Pf08209	0	0	0	0	0	0	-1	0	-1	0	0	0	0	0	1	0	0	0	0	2	1	1	0	2	3	0	3	HORVU1Hr1G060100	HORVU.MOREX.r3.1HG0062070	SAGA-associated factor 11	NA	A0A287FUE2;A0A287FUE4;A0A287FUE5;A0A287FUE6;A0A287FUE7;A0A287FUE9;A0A287FUF0;M0WPZ4;M0WPZ5	IPR013246|SAGA complex, Sgf11 subunit;|	C:DUBm complex;C:nucleus;C:SAGA-type complex;P:histone H2B conserved C-terminal lysine deubiquitination	AT5G58575_	0	0	0	0	0	0	0	0	0	0
A0A287FWV2					0	0	0	1	0	1	0	0	0	0	0	1	0	0	0	0	0	0	2	1	0	1	0	2	0	3	3	HORVU1Hr1G062470	HORVU.MOREX.r3.1HG0064010		NA	A0A287FWU9;A0A287FWV2;A0A287FWV3;A0A287FWV5;A0A287FWV8;A0A287FWW5;A0A287FWX1;A0A287FWX2;M0VPD0	IPR002048|EF-hand domain;IPR011685|LETM1-like;IPR011992|EF-hand domain pair;IPR018247|EF-Hand 1, calcium-binding site;IPR033122|Letm1 ribosome-binding domain	C:cell;C:integral component of membrane;C:membrane;C:mitochondrion;F:calcium ion binding;F:ribosome binding;P:cellular metal ion homeostasis	AT1G65540_;AT3G59820_	0	0	0	0	0	0	0	0	0	0
A0A287FWY4					0	0	0	0	0	1	0	0	0	0	0	0	0	0	0	0	-1	-1	1	0	2	0	1	2	0	3	3	HORVU1Hr1G062510	HORVU.MOREX.r3.1HG0064070	Predicted protein	NA	A0A287FWW4;A0A287FWW8;A0A287FWX0;A0A287FWY4;A0A287FWY6;A0A287FWY8;F2D2S2	IPR000644|CBS domain;IPR002550|CNNM, transmembrane domain	C:cell;C:cytoplasm;C:integral component of membrane;C:intracellular membrane-bounded organelle;C:membrane;P:cellular manganese ion homeostasis	AT1G03270_CBSDUF4;AT4G14230_CBSDUF2;AT4G14240_CBSDUF1	0	0	0	0	0	0	0	0	0	0
Q40036	metabolic process;regulation of biological process	extracellular	catalytic activity;enzyme regulator activity		1	0	1	1	0	1	1	0	1	1	0	1	1	1	0	0	0	1	4	4	3	5	1	5	6	5	11	HORVU1Hr1G065150	HORVU.MOREX.r3.1HG0066680		NA	M0W4X5;Q40036	IPR000877|Proteinase inhibitor I12, Bowman-Birk;IPR035995|Bowman-Birk type proteinase inhibitor	C:extracellular region;F:serine-type endopeptidase inhibitor activity;P:negative regulation of endopeptidase activity		0	0	0	1	0	1	0	0	1	1
F2EHA8	regulation of biological process	extracellular	enzyme regulator activity		0	0	0	0	-1	0	0	0	0	0	-1	0	0	0	0	0	-1	0	1	1	1	0	3	0	0	3	3	HORVU1Hr1G065630	HORVU.MOREX.r3.1HG0067160	Predicted protein	NA	F2EHA8	IPR000877|Proteinase inhibitor I12, Bowman-Birk	C:extracellular region;F:serine-type endopeptidase inhibitor activity;P:negative regulation of endopeptidase activity		0	0	0	0	0	0	0	0	0	0
A0A287DTW3					0	0	0	0	0	-1	0	-1	0	0	0	0	0	0	0	-1	-1	-1	1	1	3	1	2	2	1	4	5	HORVU1Hr1G065660	HORVU.MOREX.r3.1HG0067190		NA	A0A287DTW3	IPR000877|Proteinase inhibitor I12, Bowman-Birk	C:extracellular region;F:serine-type endopeptidase inhibitor activity;P:negative regulation of endopeptidase activity		0	0	0	1	0	1	1	0	0	1
A0A287G0Z3					0	0	0	0	1	1	0	0	0	0	0	0	0	-1	0	0	0	0	2	0	1	0	2	1	1	2	3	HORVU1Hr1G066520			NA	A0A287G0Z2;A0A287G0Z3;A0A287G0Z4	|	C:chloroplast;C:chloroplast envelope;C:plastid	AT3G59840_	0	0	0	0	0	0	0	0	0	0
A0A287G4N5					0	0	0	1	0	1	0	0	0	1	0	1	1	1	1	1	0	1	2	2	5	4	1	4	3	6	9	HORVU1Hr1G070690	HORVU.MOREX.r3.1HG0072060	Predicted protein	NA	A0A287G4N5;F2DAA1;Q9FSI8	IPR005247|YbhB/YbcL;IPR008914|Phosphatidylethanolamine-binding protein;IPR036610|PEBP-like superfamily		AT5G01300_	0	0	0	1	0	1	1	0	1	1
A0A287GCP2					0	0	0	1	0	0	0	0	0	1	0	0	0	0	0	0	0	0	1	1	0	2	0	0	0	2	2	HORVU1Hr1G077910			NA	A0A287GCM6;A0A287GCN1;A0A287GCN6;A0A287GCN7;A0A287GCP2;A0A287GCP3;A0A287GCP7;A0A287GCP8;A0A287GCQ3;A0A287GCQ8;A0A287GCR2;A0A287GCR4;A0A287GCS1;A0A287GCS7;A0A287GCT1	IPR002023|NADH-quinone oxidoreductase subunit E-like;IPR036249|Thioredoxin-like superfamily;IPR041921|NADH-quinone oxidoreductase subunit E, N-terminal;IPR042128|NuoE domain	C:mitochondrial respiratory chain complex I;F:2 iron, 2 sulfur cluster binding;F:iron-sulfur cluster binding;F:metal ion binding;F:NADH dehydrogenase activity;F:oxidoreductase activity;P:mitochondrial electron transport, NADH to ubiquinone;P:oxidation-reduction process;P:respiratory electron transport chain	AT4G02580_	0	0	0	0	0	0	0	0	0	0
A0A287GDC9					0	0	0	0	0	0	0	0	0	0	0	0	0	0	1	1	1	1	0	0	4	1	1	2	1	3	4	HORVU1Hr1G078350	HORVU.MOREX.r3.1HG0079120		NA	A0A287GDA5;A0A287GDB0;A0A287GDB6;A0A287GDC0;A0A287GDC1;A0A287GDC2;A0A287GDC6;A0A287GDC9;A0A287GDD0;A0A287GDD2;A0A287GDD7;A0A287GDE2;A0A287GDE6;A0A287GDE9;M0Y7A7;M0Y7A8	IPR013216|Methyltransferase type 11;IPR025771|Phosphoethanolamine N-methyltransferase;IPR029063|S-adenosyl-L-methionine-dependent methyltransferase;IPR041698|Methyltransferase domain 25	F:methyltransferase activity;F:phosphoethanolamine N-methyltransferase activity;P:phosphatidylcholine biosynthetic process	AT1G48600_NMT2;AT1G73600_;AT3G18000_NMT1	0	0	0	0	0	0	0	0	0	0
F2CR14		membrane			0	0	0	0	0	0	0	0	0	0	0	0	1	0	1	0	0	1	0	0	3	1	0	2	2	1	3	HORVU1Hr1G078500	HORVU.MOREX.r3.1HG0079220	Predicted protein	NA	A0A287GDM4;F2CR14	|	C:integral component of membrane;C:membrane		0	0	0	0	0	0	0	0	0	0
F2DZF2				Pf04667	0	1	0	0	0	0	0	0	0	0	0	0	0	0	1	0	0	1	1	0	2	0	1	2	2	1	3	HORVU1Hr1G088780	HORVU.MOREX.r3.1HG0089170		NA	A0A287GMU3;A0A287GMV0;A0A287GMV2;A0A287GMV5;A0A287GMW9;A0A287GMX4;A0A287GMY6;F2DZF2;Q8W0V1	IPR006760|Endosulphine;IPR008892|Cold-regulated 413 protein	C:integral component of membrane;C:membrane	AT1G29390_COR413IM2;AT1G29395_COR413IM1	0	0	0	0	0	0	0	0	0	0
A0A287GMX5					0	0	0	0	0	0	0	0	0	0	0	0	1	0	0	0	0	0	0	0	1	1	0	0	1	0	1	HORVU1Hr1G088920		Chlorophyll a-b binding protein, chloroplastic	NA	A0A287GMW8;A0A287GMX5;F2D460	IPR001344|Chlorophyll A-B binding protein, plant;IPR022796|Chlorophyll A-B binding protein;IPR023329|Chlorophyll a/b binding domain superfamily	C:chloroplast;C:chloroplast envelope;C:chloroplast thylakoid membrane;C:integral component of membrane;C:membrane;C:photosystem I;C:photosystem II;C:plastid;C:plastoglobule;C:thylakoid;F:chlorophyll binding;P:photosynthesis;P:photosynthesis, light harvesting;P:photosynthesis, light harvesting in photosystem I;P:protein-chromophore linkage;P:response to light stimulus	AT1G29910_LHCB1.1;AT1G29920_LHCB1.1;AT1G29930_LHCB1.3;AT2G34420_LHB1B2;AT2G34430_LHB1B1	0	0	-1	-1	-1	-1	-1	-1	-1	-1
A0A287GMW7					0	0	0	1	0	1	0	0	0	0	0	1	1	1	0	0	0	0	2	1	2	2	1	2	2	3	5	HORVU1Hr1G089360	HORVU.MOREX.r3.1HG0089460		P42210	A0A287GMW7;A0A287GMX2;A0A287GMY3;A0A287GN09;A0A287GN26	IPR001461|Aspartic peptidase A1 family;IPR001969|Aspartic peptidase, active site;IPR007856|Saposin-like type B, region 1;IPR008138|Saposin B type, region 2;IPR008139|Saposin B type domain;IPR011001|Saposin-like;IPR021109|Aspartic peptidase domain superfamily;IPR033121|Peptidase family A1 domain;IPR033869|Phytepsin	C:integral component of membrane;C:membrane;C:vacuole;F:aspartic-type endopeptidase activity;F:hydrolase activity;F:peptidase activity;P:lipid metabolic process;P:protein catabolic process;P:proteolysis	AT1G11910_APA1;AT1G62290_APA2;AT4G04460_APA3	0	0	0	0	0	0	0	0	0	0
A0A287GNC1					0	0	1	1	0	1	0	0	0	0	0	0	1	0	0	0	0	0	3	0	1	2	0	2	2	2	4	HORVU1Hr1G089820	HORVU.MOREX.r3.1HG0090150		NA	A0A287GNB2;A0A287GNC1;A0A287GND8;A0A287GNF7	IPR001478|PDZ domain;IPR001940|Peptidase S1C;IPR009003|Peptidase S1, PA clan;IPR036034|PDZ superfamily;|	F:protein binding;F:serine-type endopeptidase activity;P:proteolysis	AT3G27925_DEGP1	0	0	0	0	0	0	0	0	0	0
F2DMV7	metabolic process		metal ion binding;RNA binding	Pf00036, Pf00153, Pf13202, Pf13405, Pf13499, Pf13833	0	0	0	0	0	0	0	0	0	0	0	0	0	0	0	0	0	-1	0	0	1	0	0	1	0	1	1	HORVU1Hr1G090100	HORVU.MOREX.r3.1HG0090410	Predicted protein	NA	F2DMV7	IPR021099|Plant organelle RNA recognition domain;IPR040293|Protein WHAT'S THIS FACTOR 1-like		AT4G01037_WTF1	0	0	0	0	0	0	0	0	0	0
A0A287GPL7					0	0	0	1	0	0	0	0	0	0	0	0	0	0	0	0	0	0	1	0	0	1	0	0	0	1	1	HORVU1Hr1G090810	HORVU.MOREX.r3.1HG0091010	Proteasome subunit beta type	NA	A0A287GPL7;F2D668	IPR000243|Peptidase T1A, proteasome beta-subunit;IPR001353|Proteasome, subunit alpha/beta;IPR016050|Proteasome beta-type subunit, conserved site;IPR023333|Proteasome B-type subunit;IPR029055|Nucleophile aminohydrolases, N-terminal	C:cytoplasm;C:nucleus;C:proteasome complex;C:proteasome core complex;F:endopeptidase activity;F:hydrolase activity;F:peptidase activity;F:threonine-type endopeptidase activity;P:proteasomal protein catabolic process;P:proteasomal ubiquitin-independent protein catabolic process;P:proteasome-mediated ubiquitin-dependent protein catabolic process;P:proteolysis;P:proteolysis involved in cellular prot…	AT4G31300_PBA1	0	0	0	0	0	0	0	0	0	0
O04896	metabolic process		catalytic activity;nucleotide binding	Pf00483	0	0	0	0	0	0	0	0	0	-1	0	0	0	0	0	0	0	1	0	1	1	1	0	1	0	2	2	HORVU1Hr1G091600	HORVU.MOREX.r3.1HG0092020	Glucose-1-phosphate adenylyltransferase	P30524	A0A287GQG8;A0A287GQH5;A0A287GQI6;A0A287GQI7;A0A287GQJ2;A0A287GQK8;A0A287GQK9;A0A287GQL2;A0A287GQL3;A0A287GQL8;A0A287GQL9;A0A287GQM4;C3W8L1;O04896;U5ZZP9;U6A1T2	IPR005835|Nucleotidyl transferase domain;IPR005836|ADP-glucose pyrophosphorylase, conserved site;IPR011004|Trimeric LpxA-like superfamily;IPR011831|Glucose-1-phosphate adenylyltransferase;IPR029044|Nucleotide-diphospho-sugar transferases	C:amyloplast;C:chloroplast;C:plastid;F:ATP binding;F:catalytic activity;F:glucose-1-phosphate adenylyltransferase activity;F:nucleotide binding;F:nucleotidyltransferase activity;F:transferase activity;P:biosynthetic process;P:glycogen biosynthetic process;P:metabolic process;P:starch biosynthetic process	AT1G27680_APL2;AT2G21590_APL4;AT4G39210_APL3	0	0	0	1	0	1	0	0	0	0
A0A287GTY9					0	0	0	0	0	0	0	0	0	1	0	1	0	0	0	0	0	0	0	2	0	1	0	1	0	2	2	HORVU1Hr1G095060			NA	A0A287GTV7;A0A287GTY6;A0A287GTY9;A0A287GTZ3;A0A287GU15;A0A287GU19;A0A287GU26	IPR001163|LSM domain, eukaryotic/archaea-type;IPR010920|LSM domain superfamily;IPR034103|Sm-like protein Lsm8;|	C:integral component of membrane;C:membrane;C:nucleus;C:precatalytic spliceosome;C:spliceosomal complex;C:U4/U6 x U5 tri-snRNP complex;C:U6 snRNP;F:RNA binding;P:mRNA processing;P:mRNA splicing, via spliceosome;P:RNA metabolic process;P:RNA splicing		0	0	0	0	0	0	0	0	0	0
A0A287GYR4					0	0	0	-1	0	-1	0	0	0	-1	0	-1	0	0	0	0	0	0	2	2	0	2	0	2	0	4	4	HORVU2Hr1G005530	HORVU.MOREX.r3.2HG0100260		NA	A0A287GYR4;A0A287GYW1;M0Z1F8	|	C:chloroplast stroma	AT1G62780_	0	0	0	0	0	0	0	0	0	0
M0Y9X7	metabolic process	cytoplasm	catalytic activity;nucleotide binding;RNA binding	Pf00009, Pf03143, Pf03144	0	0	0	0	0	0	0	0	0	0	0	0	1	0	0	0	0	0	0	0	1	1	0	0	1	0	1	HORVU2Hr1G013680	HORVU.MOREX.r3.2HG0107850	Elongation factor 1-alpha	NA	A0A287H4H7;A0A287H4I2;A0A287H4I3;A0A287H4N8;A0A287H4P4;A0A287H4Q8;A0A287H4R5;M0Y9X7	IPR000795|Transcription factor, GTP-binding domain;IPR004160|Translation elongation factor EFTu/EF1A, C-terminal;IPR004161|Translation elongation factor EFTu-like, domain 2;IPR004539|Translation elongation factor EF1A, eukaryotic/archaeal;IPR009000|Translation protein, beta-barrel domain superfamily;IPR009001|Translation elongation factor EF1A/initiation factor IF2gamma, C-terminal;IPR027417|P-lo…	C:cytoplasm;F:GTP binding;F:GTPase activity;F:nucleotide binding;F:translation elongation factor activity;P:translation;P:translational elongation	AT1G07920_A1;AT1G07930_A1;AT1G07940_A1;AT1G35550_;AT5G60390_A1	0	0	0	0	0	0	0	0	0	0
A0A287HC25					0	0	-1	0	0	0	0	0	0	0	0	0	0	0	0	0	0	0	1	0	0	0	0	1	1	0	1	HORVU2Hr1G022340	HORVU.MOREX.r3.2HG0116440		NA	A0A287HC12;A0A287HC17;A0A287HC25;A0A287HC30;A0A287HC67;A0A287HC72;A0A287HC78;A0A287HC83;A0A287HCB5;F2DC93	IPR001394|Peptidase C19, ubiquitin carboxyl-terminal hydrolase;IPR018200|Ubiquitin specific protease, conserved site;IPR028889|Ubiquitin specific protease domain;IPR038765|Papain-like cysteine peptidase superfamily;|	C:integral component of membrane;C:membrane;C:nucleus;F:cysteine-type endopeptidase activity;F:cysteine-type peptidase activity;F:hydrolase activity;F:peptidase activity;F:thiol-dependent ubiquitin-specific protease activity;F:thiol-dependent ubiquitinyl hydrolase activity;P:protein deubiquitination;P:proteolysis;P:ubiquitin-dependent protein catabolic process	AT4G30890_UBP24	0	0	0	0	0	0	0	0	0	0
F2DLP9	metabolic process		protein binding		0	0	0	0	0	0	0	0	0	0	0	0	-1	-1	0	0	0	0	0	0	2	1	1	0	2	0	2	HORVU2Hr1G025180	HORVU.MOREX.r3.2HG0119160	Predicted protein	NA	A0A287HF54;F2DLP9	IPR003107|HAT (Half-A-TPR) repeat;IPR011990|Tetratricopeptide-like helical domain superfamily;IPR013026|Tetratricopeptide repeat-containing domain	C:catalytic step 2 spliceosome;C:post-mRNA release spliceosomal complex;C:Prp19 complex;C:U2-type catalytic step 2 spliceosome;F:protein binding;P:generation of catalytic spliceosome for first transesterification step;P:mRNA splicing, via spliceosome;P:RNA processing	AT5G28740_	0	0	0	0	0	0	0	0	0	0
F2D5L2	transport		metal ion binding	Pf00403	0	0	0	-1	0	0	0	0	0	0	0	0	0	0	0	0	0	0	1	0	0	1	0	0	0	1	1	HORVU2Hr1G029720	HORVU.MOREX.r3.2HG0123770	Predicted protein	NA	A0A287HJ03;A0A287HJ42;A0A287HJ47;A0A287HJF5;F2CXB4;F2D5L2	IPR006121|Heavy metal-associated domain, HMA;IPR017969|Heavy-metal-associated, conserved site;IPR036163|Heavy metal-associated domain superfamily	F:copper transmembrane transporter activity, phosphorylative mechanism;F:metal ion binding;P:copper ion transmembrane transport;P:divalent inorganic cation transport;P:metal ion transport		0	0	0	0	0	0	0	0	0	0
A0A287HJF8					0	0	0	0	0	0	0	0	0	0	0	1	0	0	0	0	0	0	0	1	0	0	0	1	0	1	1	HORVU2Hr1G030150	HORVU.MOREX.r3.2HG0124120		NA	A0A287HJB9;A0A287HJC9;A0A287HJF8;A0A287HJG8;A0A287HJN1;A0A287HJN7;A0A287HJP1;A0A287HJP6;A0A287HJS2;A0A287HJS8;A0A287HJT3	IPR002885|Pentatricopeptide repeat;IPR004182|GRAM domain;IPR011990|Tetratricopeptide-like helical domain superfamily;IPR011993|PH-like domain superfamily;IPR037848|GEM-like protein	F:protein binding		0	0	0	1	0	0	0	0	0	0
A0A287HJT1					0	0	0	0	0	0	0	0	0	1	0	0	0	0	-1	0	0	0	0	1	1	1	0	1	1	1	2	HORVU2Hr1G030640	HORVU.MOREX.r3.2HG0124560	Predicted protein	NA	A0A287HJT1;F2CVN5	IPR002048|EF-hand domain;IPR011992|EF-hand domain pair;IPR018247|EF-Hand 1, calcium-binding site	C:centriole;C:centrosome;F:calcium ion binding;P:centriole replication;P:mitotic cell cycle	AT3G50360_CML20;AT4G37010_CEN2	0	0	0	0	0	0	0	0	0	0
A0A287HLL3					0	0	0	-1	0	0	0	0	0	0	0	0	0	0	0	0	0	0	1	0	0	1	0	0	0	1	1	HORVU2Hr1G032170	HORVU.MOREX.r3.2HG0126280		NA	A0A287HL91;A0A287HL97;A0A287HLA2;A0A287HLD4;A0A287HLD9;A0A287HLL3;A0A287HLL9;A0A287HLM4;A0A287HLP0	IPR001611|Leucine-rich repeat;IPR021374|Protein of unknown function DUF2996;IPR032675|Leucine-rich repeat domain superfamily;|	F:histone binding;F:protein binding		0	0	0	0	0	0	0	0	0	0
F2E2M2					0	0	0	-1	0	-1	0	0	0	-1	0	-1	0	0	0	0	0	0	2	2	0	2	0	2	0	4	4	HORVU2Hr1G032830	HORVU.MOREX.r3.2HG0127050	Predicted protein	NA	F2E2M2	IPR039613|Protein SPIRAL1-like	C:cortical microtubule;C:cortical microtubule, transverse to long axis;C:phragmoplast;C:preprophase band;C:spindle microtubule;P:anisotropic cell growth;P:cellular response to salt stress;P:cortical microtubule organization;P:unidimensional cell growth	AT2G03680_SPR1	0	0	0	0	0	0	0	0	0	0
Q43485	metabolic process	membrane		Pf00504	0	0	1	0	0	-1	0	0	0	0	0	0	1	0	0	0	0	0	2	0	1	1	0	2	2	1	3	HORVU2Hr1G036960		Chlorophyll a-b binding protein, chloroplastic	NA	A0A287HQ72;A0A287HQ76;A0A287HQ77;A0A287HQH1;A0A287HQH2;A0A287HQH4;A0A287HQH6;F2CQY2;M0XHH8;Q43485	IPR001344|Chlorophyll A-B binding protein, plant;IPR022796|Chlorophyll A-B binding protein;IPR023329|Chlorophyll a/b binding domain superfamily	C:chloroplast;C:chloroplast thylakoid membrane;C:integral component of membrane;C:membrane;C:photosystem I;C:photosystem II;C:plastid;C:thylakoid;F:chlorophyll binding;P:photosynthesis;P:photosynthesis, light harvesting;P:photosynthesis, light harvesting in photosystem I;P:protein-chromophore linkage;P:response to light stimulus	AT3G61470_LHCA2;AT5G28450_	0	0	0	-1	0	0	0	0	0	0
A0A287HR73					0	0	0	0	0	0	0	0	0	0	0	0	0	-1	0	0	0	0	0	0	1	0	1	0	1	0	1	HORVU2Hr1G038480			NA	A0A287HR61;A0A287HR62;A0A287HR66;A0A287HR67;A0A287HR69;A0A287HR73;A0A287HR74;A0A287HR77;A0A287HR80;A0A287HR82;A0A287HRE5;A0A287HRF0;A0A287HRF4;A0A287HRF9;A0A287HRG4;A0A287HRG5;A0A287HRG8;A0A287HRG9;A0A287HRH2;A0A287HRH3;A0A287HRH4;A0A287HRH6;A0A287HRH9;A0A287HRI1;A0A287HRI2	IPR039317|Protein time for coffee;|	C:integral component of membrane;C:membrane;C:nucleus;P:regulation of circadian rhythm		0	0	0	0	0	0	0	0	0	0
A0A287HTA9					0	0	0	0	0	0	0	0	0	0	0	0	0	0	0	0	0	-1	0	0	1	0	0	1	0	1	1	HORVU2Hr1G041270		Chlorophyll a-b binding protein, chloroplastic	NA	A0A287HT12;A0A287HTA9;O65817	IPR001344|Chlorophyll A-B binding protein, plant;IPR022796|Chlorophyll A-B binding protein;IPR023329|Chlorophyll a/b binding domain superfamily	C:chloroplast;C:chloroplast envelope;C:chloroplast thylakoid membrane;C:integral component of membrane;C:membrane;C:photosystem I;C:photosystem II;C:plastid;C:plastoglobule;C:thylakoid;F:chlorophyll binding;P:photosynthesis;P:photosynthesis, light harvesting;P:photosynthesis, light harvesting in photosystem I;P:protein-chromophore linkage;P:response to light stimulus		0	0	0	-1	0	-1	0	0	0	0
A0A287HTX4					0	0	0	0	0	0	0	0	0	1	0	0	0	0	1	0	0	0	0	1	1	1	0	1	1	1	2	HORVU2Hr1G042280	HORVU.MOREX.r3.2HG0160800		NA	A0A287HTK9;A0A287HTW1;A0A287HTW2;A0A287HTX4	IPR002075|Nuclear transport factor 2;IPR018222|Nuclear transport factor 2, eukaryote;IPR032710|NTF2-like domain superfamily;IPR039539|Ras GTPase-activating protein-binding protein	C:cytosol;C:integral component of membrane;C:membrane;C:ribonucleoprotein complex;F:mRNA binding	AT3G07250_;AT3G25150_;AT5G48650_	0	0	0	0	0	0	0	0	0	0
A0A287HTR4					0	0	0	1	1	1	0	0	0	1	0	1	0	0	0	0	0	1	3	2	1	2	1	3	0	6	6	HORVU2Hr1G042460	HORVU.MOREX.r3.2HG0136770		NA	A0A287HTR4;A0A287HU01;A0A287HU17	IPR006015|Universal stress protein A family;IPR006016|UspA;IPR014729|Rossmann-like alpha/beta/alpha sandwich fold		AT1G11360_;AT4G27320_PHOS34;AT5G54430_ATPHOS32	0	0	0	0	0	0	0	0	0	0
A0A287HWS1					0	0	1	0	0	0	0	0	0	0	0	0	1	0	0	0	0	0	1	0	1	1	0	1	2	0	2	HORVU2Hr1G046740	HORVU.MOREX.r3.2HG0141480		NA	A0A287HWS1;A0A287HWS6;A0A287HWT0;A0A287HWT8;A0A287HWV2;A0A287HWV7;A0A287HWW2;A0A287HX20;A0A287HX41;A0A287HX46;A0A287HX49;A0A287HX50;A0A287HX59;A0A287HX64;A0A287HX68;A0A287HX69;A0A287HX83;A0A287HX88;A0A287HX93;M0XBI2;M0YK40	IPR000131|ATP synthase, F1 complex, gamma subunit;IPR002121|HRDC domain;IPR002562|3'-5' exonuclease domain;IPR010997|HRDC-like superfamily;IPR012337|Ribonuclease H-like superfamily;IPR023632|ATP synthase, F1 complex, gamma subunit conserved site;IPR035968|ATP synthase, F1 complex, gamma subunit superfamily;|	C:cytoplasm;C:integral component of membrane;C:intracellular;C:membrane;C:nuclear exosome (RNase complex);C:nucleolus;C:proton-transporting ATP synthase complex, catalytic core F(1);F:3'-5' exonuclease activity;F:3'-5'-exoribonuclease activity;F:catalytic activity;F:nucleic acid binding;F:nucleotide binding;F:proton-transporting ATP synthase activity, rotational mechanism;F:single-stranded RNA bi…	AT2G32415_RRP6L3	0	0	0	0	0	0	0	0	0	0
A0A287HZW2					0	0	0	0	0	0	0	0	0	0	0	0	1	1	0	0	0	0	0	0	2	1	1	0	2	0	2	HORVU2Hr1G051390			NA	A0A287HZW2	IPR000114|Ribosomal protein L16;IPR016180|Ribosomal protein L10e/L16;IPR020798|Ribosomal protein L16, conserved site;IPR036920|Ribosomal protein L10e/L16 superfamily	C:intracellular;C:mitochondrial large ribosomal subunit;C:ribosome;F:rRNA binding;F:structural constituent of ribosome;P:mitochondrial translation;P:translation	AT2G28815_;ATCG00790_RPL16	0	0	0	0	0	0	0	0	0	0
M0US99	metabolic process;transport		catalytic activity;transporter activity	Pf02823	0	1	0	0	0	0	1	0	0	0	0	1	1	0	0	1	0	1	1	2	3	3	1	2	3	3	6	HORVU2Hr1G052880	HORVU.MOREX.r3.2HG0146530		NA	A0A287I0Q8;M0US99	IPR001469|ATP synthase, F1 complex, delta/epsilon subunit;IPR020546|ATP synthase, F1 complex, delta/epsilon subunit, N-terminal;IPR036771|F0F1 ATP synthase delta/epsilon subunit, N-terminal	C:mitochondrial proton-transporting ATP synthase complex, catalytic core F(1);C:proton-transporting ATP synthase complex, catalytic core F(1);F:proton-transporting ATP synthase activity, rotational mechanism;P:ATP synthesis coupled proton transport		0	0	0	0	0	0	0	0	0	0
A0A287I4A9					0	0	0	1	0	1	0	0	0	1	0	1	0	0	0	0	0	1	2	2	1	2	0	3	0	5	5	HORVU2Hr1G059620	HORVU.MOREX.r3.2HG0152370		NA	A0A287I4A9	IPR003172|MD-2-related lipid-recognition domain;IPR014756|Immunoglobulin E-set;IPR033917|ML domain, phosphatidylinositol/phosphatidylglycerol transfer protein;IPR039670|Sterol transport protein NPC2-like	C:intracellular;F:sterol binding;P:intracellular sterol transport;P:sterol transport	AT3G11780_;AT5G06480_	0	0	0	0	0	0	0	0	0	0
A0A287I4Z8					-1	0	-1	0	0	0	1	1	1	0	0	0	0	0	0	0	-1	0	2	3	1	2	2	2	5	1	6	HORVU2Hr1G060380	HORVU.MOREX.r3.2HG0153250		NA	A0A287I4Q0;A0A287I4Q5;A0A287I4R9;A0A287I4S4;A0A287I4V0;A0A287I4V5;A0A287I4Z8;A0A287I503;A0A287I506;A0A287I511	IPR012935|Zinc finger, C3HC-like;|	C:nucleus;F:zinc ion binding	AT1G17210_ATILP1	0	0	0	0	0	0	0	0	0	0
A0A287IBQ3					-1	0	0	0	0	1	0	0	0	0	0	0	0	0	0	0	-1	0	2	0	1	1	1	1	1	2	3	HORVU2Hr1G069470	HORVU.MOREX.r3.2HG0162410		NA	A0A287IBQ3	IPR000504|RNA recognition motif domain;IPR001878|Zinc finger, CCHC-type;IPR004087|K Homology domain;IPR004088|K Homology domain, type 1;IPR012677|Nucleotide-binding alpha-beta plait domain superfamily;IPR031150|BBP/SF1 family;IPR032570|Splicing factor 1, helix-hairpin domain;IPR035979|RNA-binding domain superfamily;IPR036612|K Homology domain, type 1 superfamily;IPR036875|Zinc finger, CCHC-type s…	F:nucleic acid binding;F:pre-mRNA branch point binding;F:RNA binding;F:zinc ion binding;P:mRNA splicing, via spliceosome	AT5G51300_SF1	0	0	0	0	0	0	0	0	0	0
A0A287IBY7					1	1	0	0	0	1	0	0	0	0	0	0	0	0	0	0	0	1	3	0	1	1	1	2	2	2	4	HORVU2Hr1G069610	HORVU.MOREX.r3.2HG0162570		NA	A0A287IBR8;A0A287IBS2;A0A287IBU1;A0A287IBU9;A0A287IBX3;A0A287IBY2;A0A287IBY7;M0US61	IPR007454|Uncharacterised protein family UPF0250;IPR027471|YbeD-like domain superfamily;|			0	0	0	0	0	0	0	0	0	0
A0A287IFJ7					0	0	0	0	0	0	0	0	0	1	0	1	0	0	0	0	0	0	0	2	0	1	0	1	0	2	2	HORVU2Hr1G073300	HORVU.MOREX.r3.2HG0166630		NA	A0A287IFJ7;A0A287IFK6;A0A287IFM3;A0A287IFN9;A0A287IFP4	IPR003323|OTU domain;IPR009060|UBA-like superfamily;IPR031084|OTU domain-containing protein 5;IPR038765|Papain-like cysteine peptidase superfamily	F:histone binding;F:Lys63-specific deubiquitinase activity;F:nucleosome binding;F:protein binding;F:thiol-dependent ubiquitin-specific protease activity;P:histone deubiquitination;P:negative regulation of transcription, DNA-templated;P:protein deubiquitination;P:protein K63-linked deubiquitination;P:proteolysis	AT2G27350_	0	0	0	0	0	0	0	0	0	0
A0A287IH69					0	1	0	0	0	0	0	0	0	0	0	0	0	0	0	0	0	-1	1	0	1	0	1	1	1	1	2	HORVU2Hr1G075330	HORVU.MOREX.r3.2HG0168650		NA	A0A287IH11;A0A287IH32;A0A287IH35;A0A287IH69;A0A287IH82	IPR016181|Acyl-CoA N-acyltransferase;IPR031165|Yjdj-type Gcn5-related N-acetyltransferase		AT1G21770_;AT1G77540_	0	0	0	0	0	0	0	0	0	0
E9LFE6	transport	membrane	transporter activity	Pf00571, Pf00654	0	0	0	1	0	1	0	0	0	0	0	1	0	0	0	0	0	0	2	1	0	1	0	2	0	3	3	HORVU2Hr1G077080	HORVU.MOREX.r3.2HG0170290		NA	A0A287IIP6;A0A287IIQ4;A0A287IIQ6;A0A287IIR6;A0A287IIV5;A0A287IIV8;E9LFE6;M0WUD4	IPR000644|CBS domain;IPR001807|Chloride channel, voltage gated;IPR002251|Chloride channel ClC-plant;IPR014743|Chloride channel, core	C:integral component of membrane;C:intracellular membrane-bounded organelle;C:membrane;C:plant-type vacuole membrane;C:vacuolar membrane;F:chloride transmembrane transporter activity;F:transmembrane transporter activity;F:voltage-gated chloride channel activity;P:chloride transmembrane transport;P:chloride transport;P:ion transport;P:transmembrane transport	AT5G49890_CLC-C	0	0	0	0	0	0	0	0	0	0
M0UGW6				Pf00011	0	0	0	0	0	0	0	0	0	0	0	0	0	0	0	0	0	-1	0	0	1	0	0	1	0	1	1	HORVU2Hr1G077710	HORVU.MOREX.r3.2HG0170930		NA	A0A287IJH1;M0UGW6	IPR002068|Alpha crystallin/Hsp20 domain;IPR008978|HSP20-like chaperone;IPR031107|Small heat shock protein HSP20	C:endoplasmic reticulum;F:protein self-association;F:unfolded protein binding;P:protein complex oligomerization;P:protein folding;P:response to heat;P:response to reactive oxygen species;P:response to salt stress	AT4G10250_HSP22.0	0	0	0	0	0	0	0	0	0	0
F2DH67	metabolic process				0	0	0	-1	0	-1	0	-1	0	0	0	-1	0	0	0	0	0	-1	2	2	1	1	1	3	1	4	5	HORVU2Hr1G079180	HORVU.MOREX.r3.2HG0172200	Predicted protein	NA	A0A287IKK9;A0A287IKL1;F2DH67;M0Y6J0	IPR000489|Pterin-binding domain;|	P:pteridine-containing compound metabolic process		0	0	0	-1	0	0	0	0	0	0
A0A287IL79					0	0	1	1	1	1	0	0	0	0	0	0	1	0	0	0	0	0	4	0	1	2	1	2	2	3	5	HORVU2Hr1G079840	HORVU.MOREX.r3.2HG0172790		NA	A0A287IL31;A0A287IL38;A0A287IL79	IPR001024|PLAT/LH2 domain;IPR036392|PLAT/LH2 domain superfamily	F:protein binding	AT2G22170_PLAT2;AT4G39730_PLAT1;AT5G65158_PLAT3	0	0	0	0	0	0	0	0	0	0
F2CQR8	metabolic process	membrane		Pf00504	0	0	0	0	0	0	0	0	0	0	0	0	0	0	0	0	0	-1	0	0	1	0	0	1	0	1	1	HORVU2Hr1G079920		Chlorophyll a-b binding protein, chloroplastic	NA	A0A287IL50;F2CQR8;M0ULA3;Q7M1K7	IPR001344|Chlorophyll A-B binding protein, plant;IPR022796|Chlorophyll A-B binding protein;IPR023329|Chlorophyll a/b binding domain superfamily	C:chloroplast;C:chloroplast envelope;C:chloroplast thylakoid membrane;C:integral component of membrane;C:membrane;C:photosystem I;C:photosystem II;C:plastid;C:plastoglobule;C:thylakoid;F:chlorophyll binding;P:photosynthesis;P:photosynthesis, light harvesting;P:photosynthesis, light harvesting in photosystem I;P:protein-chromophore linkage;P:response to light stimulus	AT1G15820_LHCB6	0	0	0	-1	0	-1	0	0	-1	0
M0W1G3	metabolic process	ribosome	structural molecule activity	Pf04839	0	0	0	0	1	0	0	0	0	0	0	0	1	0	0	1	1	1	1	0	4	2	2	1	1	4	5	HORVU2Hr1G080480			O48609	A0A287ILN5;M0W1G3	IPR006924|Ribosomal protein PSRP-3/Ycf65;IPR038447|PSRP-3/Ycf65 superfamily	C:chloroplast;C:plastid;C:ribosome;F:structural constituent of ribosome;P:translation		0	0	0	0	0	0	0	0	0	0
A0A287INY8					0	0	0	0	0	0	0	0	0	0	0	0	-1	0	0	0	0	0	0	0	1	1	0	0	1	0	1	HORVU2Hr1G082940	HORVU.MOREX.r3.2HG0175730		NA	A0A287INR2;A0A287INS2;A0A287INX4;A0A287INY8	|		AT5G14440_;AT5G40570_	0	0	0	0	0	0	0	0	0	0
A0A287IQB8					0	0	0	0	-1	0	0	0	0	-1	-1	0	1	0	0	1	1	0	1	2	3	3	3	0	1	5	6	HORVU2Hr1G084630	HORVU.MOREX.r3.UnG0770720		NA	A0A287IQB8;A0A287IQD8;A0A287IQI9	IPR000685|Ribulose bisphosphate carboxylase, large subunit, C-terminal;IPR017443|Ribulose bisphosphate carboxylase, large subunit, ferrodoxin-like N-terminal;IPR033966|RuBisCO;IPR036376|Ribulose bisphosphate carboxylase, large subunit, C-terminal domain superfamily;IPR036422|RuBisCO large subunit, N-terminal domain superfamily	F:magnesium ion binding;F:ribulose-bisphosphate carboxylase activity;P:carbon fixation	ATMG00280_ORF110A	0	0	0	-1	0	-1	0	0	0	0
A0A287IQT8					0	0	0	0	0	0	0	0	0	0	0	0	1	0	0	0	0	0	0	0	1	1	0	0	1	0	1	HORVU2Hr1G084750	HORVU.MOREX.r3.2HG0177550		NA	A0A287IQK6;A0A287IQL3;A0A287IQP5;A0A287IQQ1;A0A287IQR1;A0A287IQR7;A0A287IQT0;A0A287IQT3;A0A287IQT6;A0A287IQT8;A0A287IQU3	IPR006349|2-phosphoglycolate phosphatase, eukaryotic;IPR006357|HAD-superfamily hydrolase, subfamily IIA;IPR023214|HAD superfamily;IPR036412|HAD-like superfamily	F:hydrolase activity;F:phosphatase activity;F:phosphoglycolate phosphatase activity;P:dephosphorylation		0	0	0	0	0	0	0	0	0	0
M0V6H7		membrane	catalytic activity	Pf01501	0	1	0	0	0	0	0	0	0	0	0	0	0	0	0	0	0	0	1	0	0	0	1	0	1	0	1	HORVU2Hr1G089320	HORVU.MOREX.r3.2HG0181880		NA	A0A287IVA6;A0A287IVD8;A0A287IVE3;A0A287IVF2;A0A287IVF7;A0A287IVG4;A0A287IVG9;M0V6H5;M0V6H6;M0V6H7	IPR002495|Glycosyl transferase, family 8;IPR029044|Nucleotide-diphospho-sugar transferases;|	C:integral component of membrane;C:membrane;F:transferase activity;F:transferase activity, transferring glycosyl groups	AT5G18480_IPUT1	0	0	0	0	0	0	0	0	0	0
A0A287IX56					0	0	0	0	0	0	0	0	0	0	0	0	-1	0	0	0	0	0	0	0	1	1	0	0	1	0	1	HORVU2Hr1G091320	HORVU.MOREX.r3.2HG0183890		NA	A0A287IX56;A0A287IX59;A0A287IX61;A0A287IX64;A0A287IX85;A0A287IX90;A0A287IX93;A0A287IX97	IPR000008|C2 domain;IPR035892|C2 domain superfamily;|			0	0	0	0	0	0	0	0	0	0
A0A287IXV3					0	0	0	0	0	0	0	0	0	-1	0	0	1	0	0	1	1	0	0	1	3	3	1	0	1	3	4	HORVU2Hr1G092180	HORVU.MOREX.r3.2HG0184630	Elongation factor G, chloroplastic	NA	A0A287IXV3;A0A287IXZ0;A0A287IY10	IPR000640|Elongation factor EFG, domain V-like;IPR000795|Transcription factor, GTP-binding domain;IPR004161|Translation elongation factor EFTu-like, domain 2;IPR004540|Translation elongation factor EFG/EF2;IPR005225|Small GTP-binding protein domain;IPR005517|Translation elongation factor EFG/EF2, domain IV;IPR009000|Translation protein, beta-barrel domain superfamily;IPR009022|Elongation factor G…	C:apoplast;C:chloroplast;C:chloroplast envelope;C:chloroplast stroma;C:intracellular;C:mitochondrion;C:plastid;F:ATP binding;F:GTP binding;F:GTPase activity;F:nucleotide binding;F:translation elongation factor activity;P:chloroplast organization;P:post-embryonic development;P:ribosome disassembly;P:seed germination;P:translation;P:translational elongation	AT1G62750_CPEFG	0	0	0	0	0	0	0	0	0	0
A0A287IXV9					0	0	0	0	0	0	0	0	0	0	0	0	0	0	0	0	0	1	0	0	1	0	0	1	0	1	1	HORVU2Hr1G092190	HORVU.MOREX.r3.2HG0184620		NA	A0A287IXV9;A0A287IXW2;A0A287IXZ5	IPR001440|Tetratricopeptide repeat 1;IPR006636|Heat shock chaperonin-binding;IPR011990|Tetratricopeptide-like helical domain superfamily;IPR013026|Tetratricopeptide repeat-containing domain;IPR019734|Tetratricopeptide repeat;IPR041243|STI1 domain	F:Hsp90 protein binding;F:protein binding	AT1G12270_HOP1;AT1G62740_HOP2;AT4G12400_HOP3	0	0	0	0	0	0	0	0	0	0
A0A287J4M0					0	0	0	0	0	1	0	0	0	0	0	0	1	0	0	1	0	0	1	0	2	2	0	1	1	2	3	HORVU2Hr1G099230			NA	A0A287J4J0;A0A287J4J4;A0A287J4J6;A0A287J4J9;A0A287J4K0;A0A287J4K4;A0A287J4K8;A0A287J4M0;A0A287J4M6;A0A287J4N7;A0A287J4S9;A0A287J4T4;A0A287J4T7;A0A287J4U9;A0A287J4V2;A0A287J4V7;A0A287J4W2;F2EEU3	IPR000266|Ribosomal protein S17/S11;IPR012340|Nucleic acid-binding, OB-fold;IPR019979|Ribosomal protein S17, conserved site;IPR028333|Ribosomal protein S17, archaeal/eukaryotic;IPR032440|40S ribosomal protein S11, N-terminal	C:cytosolic small ribosomal subunit;C:intracellular;C:ribosome;F:structural constituent of ribosome;P:translation	AT3G48930_RPS11A;AT4G30800_RPS11B;AT5G23740_RPS11C	0	0	0	0	0	0	0	0	0	0
A0A287J5V4					0	0	0	0	1	1	1	0	1	1	0	1	0	0	0	0	0	0	2	4	0	2	1	3	2	4	6	HORVU2Hr1G100290	HORVU.MOREX.r3.2HG0192160		NA	A0A287J5V4;A0A287J5V5;A0A287J5Z4;A0A287J631;A0A287J669	IPR013170|mRNA splicing factor Cwf21 domain;|			0	0	0	0	0	0	0	0	0	0
A0A287J7G2					0	0	0	-1	0	0	0	0	0	0	0	0	-1	0	0	-1	0	-1	1	0	3	3	0	1	1	3	4	HORVU2Hr1G101720			NA	A0A287J7B3;A0A287J7C6;A0A287J7G2;A0A287J7K6	IPR039206|MORF/ORRM1/DAG-like	C:mitochondrion;P:cytidine to uridine editing;P:mitochondrial mRNA modification	AT1G32580_MORF5;AT2G35240_MORF6	0	0	0	0	0	0	0	0	0	0
F2CY55	metabolic process;response to stimulus		antioxidant activity;catalytic activity	Pf00141	0	0	1	0	0	0	0	0	0	-1	0	0	1	1	0	1	1	0	1	1	4	3	2	1	3	3	6	HORVU2Hr1G101730	HORVU.MOREX.r3.2HG0193390		NA	A0A287J7D1;A0A287J7D6;A0A287J7H5;A0A287J7L1;A0A287J7L5;A0A287J7L9;A0A287J7N4;A0A287J7N9;A0A287J7P6;F2CY55;M0YZU1;M0YZU2	IPR002016|Haem peroxidase;IPR002207|Class I peroxidase;IPR010255|Haem peroxidase superfamily;|	C:chloroplast;C:chloroplast thylakoid membrane;F:heme binding;F:peroxidase activity;P:cellular oxidant detoxification;P:cellular response to oxidative stress;P:hydrogen peroxide catabolic process;P:oxidation-reduction process;P:response to oxidative stress;P:response to reactive oxygen species	AT4G09010_APX4	0	0	0	-1	0	-1	0	0	0	0
A0A287JDT6					0	0	0	0	0	0	0	0	0	0	0	0	1	0	0	0	0	0	0	0	1	1	0	0	1	0	1	HORVU2Hr1G108990	HORVU.MOREX.r3.2HG0200280		NA	A0A287JDT6;A0A287JDV2	IPR006843|Plastid lipid-associated protein/fibrillin conserved domain;IPR039633|Plastid-lipid-associated protein		AT2G42130_PAP13;AT3G58010_PAP9	0	0	0	0	0	0	0	0	0	0
A0A287JEY2					0	1	1	0	0	0	0	0	0	0	1	0	0	0	0	1	0	0	2	1	1	1	2	1	2	2	4	HORVU2Hr1G110110	HORVU.MOREX.r3.2HG0201400	Serine hydroxymethyltransferase	NA	A0A287JES4;A0A287JEY2;A0A287JF36;O23984	IPR001085|Serine hydroxymethyltransferase;IPR015421|Pyridoxal phosphate-dependent transferase, major domain;IPR015422|Pyridoxal phosphate-dependent transferase domain 1;IPR015424|Pyridoxal phosphate-dependent transferase;IPR019798|Serine hydroxymethyltransferase, pyridoxal phosphate binding site;IPR039429|Serine hydroxymethyltransferase-like domain	F:amino acid binding;F:catalytic activity;F:cobalt ion binding;F:glycine hydroxymethyltransferase activity;F:pyridoxal phosphate binding;F:serine binding;F:transferase activity;F:zinc ion binding;P:cellular response to tetrahydrofolate;P:folic acid metabolic process;P:glycine biosynthetic process from serine;P:glycine metabolic process;P:L-serine catabolic process;P:one-carbon metabolic process;P…	AT4G13890_SHM5;AT4G13930_SHM4	0	0	0	0	0	0	0	0	0	0
A0A287JG58					0	0	0	0	0	0	0	0	0	0	0	0	1	1	1	0	0	0	0	0	3	1	1	1	3	0	3	HORVU2Hr1G111640	HORVU.MOREX.r3.2HG0202670	Plasma membrane ATPase	NA	A0A287JFZ3;A0A287JFZ6;A0A287JFZ8;A0A287JG00;A0A287JG03;A0A287JG05;A0A287JG07;A0A287JG11;A0A287JG12;A0A287JG16;A0A287JG53;A0A287JG58;A0A287JG62;A0A287JG63;A0A287JG67;A0A287JG68;A0A287JG73;A0A287JG79;A0A287JG84;A0A287JG89;A0A287JGC3;A0A287JGC9;A0A287JGD3;A0A287JGE0;A0A287JGE3;O48614;Q93X52;Q9ATZ7;Q9ATZ8;Q9AVV3;Q9FSI7	IPR001757|P-type ATPase;IPR004014|Cation-transporting P-type ATPase, N-terminal;IPR006534|P-type ATPase, subfamily IIIA;IPR008250|P-type ATPase, A domain superfamily;IPR018303|P-type ATPase, phosphorylation site;IPR023214|HAD superfamily;IPR023298|P-type ATPase, transmembrane domain superfamily;IPR023299|P-type ATPase, cytoplasmic domain N;IPR036412|HAD-like superfamily	C:cell;C:integral component of membrane;C:membrane;C:plasma membrane;F:ATP binding;F:hydrolase activity;F:metal ion binding;F:nucleotide binding;F:proton-exporting ATPase activity, phosphorylative mechanism;P:ion transport;P:proton export across plasma membrane;P:proton transmembrane transport;P:regulation of intracellular pH		0	0	0	0	0	0	0	0	0	0
A0A287JGQ1					-1	0	0	0	0	0	0	0	0	0	0	0	0	0	0	1	1	0	1	0	2	2	1	0	1	2	3	HORVU2Hr1G112630	HORVU.MOREX.r3.2HG0203560		NA	A0A287JGQ1;A0A287JGQ2;A0A287JGV2;A0A287JGW6	IPR013126|Heat shock protein 70 family;IPR018181|Heat shock protein 70, conserved site;IPR029047|Heat shock protein 70kD, peptide-binding domain superfamily	C:cytoplasm;F:ATP binding;F:ATPase activity;F:ATPase activity, coupled;F:heat shock protein binding;F:misfolded protein binding;F:nucleotide binding;F:protein folding chaperone;F:unfolded protein binding;P:cellular response to unfolded protein;P:chaperone cofactor-dependent protein refolding;P:protein refolding;P:response to unfolded protein		0	0	0	0	0	0	0	0	0	0
A0A2R9IRE8					0	0	0	0	0	0	0	0	0	0	0	0	0	0	0	0	1	0	0	0	1	0	1	0	0	1	1	HORVU2Hr1G116190	HORVU.MOREX.r3.2HG0207040		NA	A0A2R9IRE6;A0A2R9IRE8;A0A2R9IRF0;A0A2R9IRF2;A0A2R9IRF3;A0A2R9IRF4;A0A2R9IRF5;A0A2R9IRF7;A0A2R9IRF8;A0A2R9IRF9;A0A2R9IRG2;A0A2R9IRG4;A0A2R9ISU9;A0A2R9ISV2;A0A2R9ISV6	IPR019133|Mitochondrial inner membrane protein Mitofilin	C:inner mitochondrial membrane protein complex;C:integral component of membrane;C:membrane;C:MICOS complex;C:mitochondrial inner membrane;C:mitochondrion;F:cardiolipin binding;P:cristae formation;P:mitochondrion morphogenesis;P:regulation of membrane lipid distribution	AT4G39690_	0	0	0	0	0	0	0	0	0	0
M0WUF3	cell death;cell organization and biogenesis;metabolic process	cytoplasm;mitochondrion	metal ion binding	Pf05093	0	0	0	1	1	1	0	0	0	0	0	0	-1	0	0	0	0	0	3	0	1	2	1	1	1	3	4	HORVU2Hr1G120230	HORVU.MOREX.r3.2HG0210680	Anamorsin homolog	NA	A0A287JNP5;A0A287JNQ0;A0A287JNU1;A0A287JNZ5;A0A287JP23;A0A287JP28;M0WUF3	IPR007785|Anamorsin;IPR013216|Methyltransferase type 11;IPR029063|S-adenosyl-L-methionine-dependent methyltransferase;|	C:cytoplasm;C:mitochondrial intermembrane space;C:mitochondrion;F:2 iron, 2 sulfur cluster binding;F:4 iron, 4 sulfur cluster binding;F:electron transfer activity;F:iron-sulfur cluster binding;F:metal ion binding;F:methyltransferase activity;P:electron transport chain;P:iron-sulfur cluster assembly	AT5G18400_	0	0	0	0	0	0	0	0	0	0
A0A287JSF7					1	1	1	0	0	0	0	0	0	0	0	0	1	0	0	1	0	0	3	0	2	3	1	1	4	1	5	HORVU2Hr1G124400	HORVU.MOREX.r3.2HG0214780	3-isopropylmalate dehydrogenase	NA	A0A287JSC0;A0A287JSF1;A0A287JSF7;A0A287JSL8;A0A287JSM3;A0A287JSP2	IPR004429|Isopropylmalate dehydrogenase;IPR019818|Isocitrate/isopropylmalate dehydrogenase, conserved site;IPR024084|Isopropylmalate dehydrogenase-like domain;|	C:cytoplasm;F:3-isopropylmalate dehydrogenase activity;F:magnesium ion binding;F:metal ion binding;F:NAD binding;F:oxidoreductase activity;F:oxidoreductase activity, acting on the CH-OH group of donors, NAD or NADP as acceptor;P:branched-chain amino acid biosynthetic process;P:leucine biosynthetic process;P:oxidation-reduction process	AT1G31180_ATIMD3;AT1G80560_IMDH2;AT5G14200_IMDH3	0	0	0	0	0	0	0	0	0	0
A0A287JSY9					0	0	0	0	0	0	0	0	0	0	0	0	-1	0	0	0	0	0	0	0	1	1	0	0	1	0	1	HORVU2Hr1G124800	HORVU.MOREX.r3.2HG0215110		NA	A0A287JSM0;A0A287JSQ9;A0A287JSX3;A0A287JSY9	IPR013766|Thioredoxin domain;IPR036249|Thioredoxin-like superfamily	C:cell;C:chloroplast;F:protein disulfide oxidoreductase activity;P:cell redox homeostasis;P:glycerol ether metabolic process	AT1G07700_	0	0	0	0	0	0	0	0	0	0
A0A287JTU1					0	0	0	0	0	0	1	0	0	0	0	0	0	1	0	0	0	0	0	1	1	1	1	0	2	0	2	HORVU2Hr1G126730	HORVU.MOREX.r3.2HG0217090		NA	A0A287JTT6;A0A287JTU1;A0A287JTW2;A0A287JTX7;A0A287JU38;A0A287JU55;M0XKJ9	IPR000008|C2 domain;IPR013583|Phosphoribosyltransferase C-terminal;IPR035892|C2 domain superfamily	C:integral component of membrane;C:membrane	AT1G22610_	0	0	0	0	0	0	0	0	0	0
A0A287K1M0					0	0	0	0	0	0	1	0	1	1	1	0	0	0	0	0	0	0	0	4	0	2	1	1	2	2	4	HORVU3Hr1G007420	HORVU.MOREX.r3.3HG0226060		NA	A0A287K1M0	IPR002048|EF-hand domain;IPR011992|EF-hand domain pair;IPR018247|EF-Hand 1, calcium-binding site;IPR039647|EF-hand domain pair protein CML-like	F:calcium ion binding		0	0	0	0	0	0	0	0	0	0
A0A287K2D3					0	0	0	1	0	0	0	0	0	1	0	1	0	0	0	0	0	0	1	2	0	2	0	1	0	3	3	HORVU3Hr1G009320	HORVU.MOREX.r3.3HG0227320	Non-specific lipid-transfer protein	NA	A0A287K2D3	IPR000528|Plant lipid transfer protein/Par allergen;IPR016140|Bifunctional inhibitor/plant lipid transfer protein/seed storage helical domain;IPR036312|Bifunctional inhibitor/plant lipid transfer protein/seed storage helical domain superfamily	C:membrane;F:lipid binding;P:lipid transport		0	0	0	0	0	0	0	0	0	0
F2D8E5	transport			Pf00234	0	0	0	0	0	0	0	0	0	0	0	0	-1	0	0	0	0	1	0	0	2	1	0	1	1	1	2	HORVU3Hr1G009360	HORVU.MOREX.r3.3HG0227360	Non-specific lipid-transfer protein	NA	A0A287K2C9;A0A287K2D7;A0A287K2E2;A0A287K2G9;A0A287K2H4;F2D8E5;M0V695;Q42849;Q43762	IPR000528|Plant lipid transfer protein/Par allergen;IPR016140|Bifunctional inhibitor/plant lipid transfer protein/seed storage helical domain;IPR036312|Bifunctional inhibitor/plant lipid transfer protein/seed storage helical domain superfamily	C:integral component of membrane;C:membrane;F:lipid binding;P:lipid transport		0	0	0	0	0	0	0	0	0	0
A0A287K7P8					0	0	0	0	0	0	0	0	0	0	0	0	1	1	0	0	0	0	0	0	2	1	1	0	2	0	2	HORVU3Hr1G015620			NA	A0A287K7N6;A0A287K7N9;A0A287K7P2;A0A287K7P4;A0A287K7P7;A0A287K7P8;A0A287K7P9;A0A287K7Q3;A0A287K7Q4;A0A287K7Q5;A0A287K7R7;A0A287K7T0;A0A287K7T5;A0A287K7U0;A0A287K7U6;A0A287K7V1;A0A287K7W0;A0A287K7W4;M0VY91	IPR000195|Rab-GTPase-TBC domain;IPR001216|Cysteine synthase/cystathionine beta-synthase, pyridoxal-phosphate attachment site;IPR001926|Pyridoxal-phosphate dependent enzyme;IPR005856|Cysteine synthase;IPR005859|Cysteine synthase CysK;IPR035969|Rab-GTPase-TBC domain superfamily;IPR036052|Tryptophan synthase beta subunit-like PLP-dependent enzyme;|	F:cysteine synthase activity;F:GTPase activator activity;F:Rab GTPase binding;F:transferase activity;P:activation of GTPase activity;P:cellular amino acid biosynthetic process;P:cysteine biosynthetic process;P:cysteine biosynthetic process from serine;P:intracellular protein transport	AT2G43490_;AT3G59570_	0	0	0	0	0	0	0	0	0	0
A0A287KFS3					0	0	0	0	0	0	0	0	0	0	0	0	0	0	0	1	1	1	0	0	3	1	1	1	0	3	3	HORVU3Hr1G023810	HORVU.MOREX.r3.3HG0241050		NA	A0A287KFP9;A0A287KFQ3;A0A287KFQ4;A0A287KFR1;A0A287KFR2;A0A287KFR4;A0A287KFR6;A0A287KFS2;A0A287KFS3;A0A287KFS7;A0A287KFT1;A0A287KFT2;A0A287KFU1;A0A287KFX8;A0A287KFY8;M0XH07;M0XH08;M0XH09	IPR013951|Histone deacetylation protein Rxt3;IPR036609|LCCL domain superfamily;|	P:histone deacetylation		0	0	0	0	0	0	0	0	0	0
A0A287KH95					0	0	0	0	0	0	0	0	0	0	0	0	1	1	1	0	0	0	0	0	3	1	1	1	3	0	3	HORVU3Hr1G025820	HORVU.MOREX.r3.3HG0242970	Predicted protein	NA	A0A287KH95;A0A287KH96;A0A287KH98;A0A287KHA0;A0A287KHA2;A0A287KHE8;F2D0V3	IPR002067|Mitochondrial carrier protein;IPR018108|Mitochondrial substrate/solute carrier;IPR023395|Mitochondrial carrier domain superfamily	C:integral component of membrane;C:membrane;F:oxoglutarate:malate antiporter activity;F:transmembrane transporter activity;P:alpha-ketoglutarate transport;P:malate transmembrane transport;P:transmembrane transport	AT5G19760_DTC	0	0	0	0	0	0	0	0	0	0
M0UFX2	metabolic process	ribosome	structural molecule activity	Pf00281, Pf00673	0	0	0	0	0	0	0	0	0	0	0	0	0	0	0	0	0	-1	0	0	1	0	0	1	0	1	1	HORVU3Hr1G026060			NA	A0A287KHE2;A0A287KHE7;A0A287KHE9;M0UFX2	IPR002132|Ribosomal protein L5;IPR020929|Ribosomal protein L5, conserved site;IPR022803|Ribosomal protein L5 domain superfamily;IPR031309|Ribosomal protein L5, C-terminal;IPR031310|Ribosomal protein L5, N-terminal	C:cytosolic large ribosomal subunit;C:intracellular;C:ribosome;F:RNA binding;F:structural constituent of ribosome;P:ribosomal large subunit assembly;P:translation	AT2G42740_RPL11A;AT3G58700_RPL11C;AT4G18730_RPL11C;AT5G45775_RPL11C	0	0	0	0	0	0	0	0	0	0
A0A287KMB8					0	0	-1	0	0	0	0	0	0	0	0	0	0	0	0	0	0	0	1	0	0	0	0	1	1	0	1	HORVU3Hr1G030760		Reticulon-like protein	NA	A0A287KM91;A0A287KM92;A0A287KM95;A0A287KM99;A0A287KMA4;A0A287KMB8	IPR003388|Reticulon	C:endoplasmic reticulum;C:endoplasmic reticulum membrane;C:integral component of membrane;C:membrane	AT1G64090_RTNLB3;AT2G46170_RTNLB5;AT3G61560_RTNLB6;AT4G01230_RTNLB7;AT4G11220_RTNLB2;AT4G23630_RTNLB1;AT5G41600_RTNLB4	0	0	0	0	0	0	0	0	0	0
A0A287KNT7					0	1	0	0	0	0	0	0	0	0	0	0	0	0	0	0	0	0	1	0	0	0	1	0	1	0	1	HORVU3Hr1G032420	HORVU.MOREX.r3.3HG0250180		NA	A0A287KNT5;A0A287KNT7;A0A287KNU0;A0A287KNU3;A0A287KNU5;A0A287KNU8;A0A287KNU9;A0A287KNV2;A0A287KNV4;A0A287KNV8;A0A287KNW0;A0A287KNW4;A0A287KNW5;A0A287KNW7;A0A287KNX2;A0A287KNX4	IPR001680|WD40 repeat;IPR004813|Oligopeptide transporter, OPT superfamily;IPR007287|Sof1-like protein;IPR011047|Quinoprotein alcohol dehydrogenase-like superfamily;IPR012340|Nucleic acid-binding, OB-fold;IPR015943|WD40/YVTN repeat-like-containing domain superfamily;IPR017986|WD40-repeat-containing domain;IPR019775|WD40 repeat, conserved site;IPR020472|G-protein beta WD-40 repeat;IPR036322|WD40-re…	C:integral component of membrane;C:membrane;C:plasma membrane;F:protein binding;P:transmembrane transport		0	0	0	0	0	0	0	0	0	0
F2E652			metal ion binding	Pf00642	0	0	0	1	1	0	0	0	-1	0	0	0	0	0	0	1	0	0	2	1	1	2	1	1	1	3	4	HORVU3Hr1G035750	HORVU.MOREX.r3.3HG0254020		NA	A0A287KRG1;A0A287KRG4;A0A287KRG6;A0A287KRG9;A0A287KRH0;A0A287KRH1;A0A287KRH3;F2E652;M0XIS6	IPR000571|Zinc finger, CCCH-type;IPR036855|Zinc finger, CCCH-type superfamily	F:metal ion binding	AT2G47850_;AT3G06410_;AT5G18550_	0	0	0	0	0	0	0	0	0	0
A0A287KSU3					0	0	0	1	0	0	0	0	0	0	0	0	0	0	0	0	0	0	1	0	0	1	0	0	0	1	1	HORVU3Hr1G037720	HORVU.MOREX.r3.3HG0255690		NA	A0A287KSU3;A0A287KSW9	IPR013740|Redoxin;IPR013766|Thioredoxin domain;IPR036249|Thioredoxin-like superfamily;IPR037944|Peroxiredoxin-5-like	C:cell;C:cytoplasm;C:mitochondrial matrix;C:mitochondrion;F:antioxidant activity;F:oxidoreductase activity;F:peroxidase activity;F:peroxiredoxin activity;F:thioredoxin peroxidase activity;P:cell redox homeostasis;P:cellular oxidant detoxification;P:cellular response to oxidative stress;P:hydrogen peroxide catabolic process;P:oxidation-reduction process;P:response to cadmium ion;P:response to oxid…	AT3G06050_PRXIIF	0	0	0	0	0	0	0	0	0	0
A0A287KZG1					0	0	0	1	0	0	0	0	0	0	0	0	0	0	0	0	0	0	1	0	0	1	0	0	0	1	1	HORVU3Hr1G049060	HORVU.MOREX.r3.3HG0266310		NA	A0A287KZD4;A0A287KZD5;A0A287KZD8;A0A287KZD9;A0A287KZE5;A0A287KZE8;A0A287KZF1;A0A287KZG1;A4GWV0;M0US72	IPR004713|Calcium/proton exchanger;IPR004798|Calcium/proton exchanger CAX;IPR004837|Sodium/calcium exchanger membrane region	C:cell;C:integral component of membrane;C:membrane;C:plant-type vacuole membrane;C:vacuolar membrane;C:vacuole;F:antiporter activity;F:calcium:proton antiporter activity;F:cation transmembrane transporter activity;P:calcium ion transmembrane transport;P:calcium ion transport;P:cation transport;P:cellular calcium ion homeostasis;P:ion transport;P:transmembrane transport	AT2G38170_CAX1;AT3G51860_CAX3;AT5G01490_CAX4	0	0	0	0	0	0	0	0	0	0
M0YS97	cell organization and biogenesis;response to stimulus	membrane		Pf06549	0	0	0	0	0	0	0	0	0	-1	0	-1	0	0	0	0	0	0	0	2	0	1	0	1	0	2	2	HORVU3Hr1G050800	HORVU.MOREX.r3.3HG0268400		NA	M0YS97	IPR009500|Protein of unknown function DUF1118		AT1G74730_	0	0	0	0	0	0	0	0	0	0
Q8W516			protein binding	Pf00515, Pf04969, Pf05002, Pf07719, Pf12895, Pf13181, Pf13371, Pf13414, Pf13424, Pf13428, Pf13432, Pf14559	-1	0	0	1	0	1	0	0	0	0	0	0	0	0	0	0	0	0	3	0	0	2	0	1	1	2	3	HORVU3Hr1G055920	HORVU.MOREX.r3.3HG0273490	Predicted protein	NA	A0A287L4P8;A0A287L4Q6;A0A287L4R0;A0A287L4R6;A0A287L4R8;A0A287L4R9;A0A287L4S2;F2E724;Q8W516	IPR007052|CS domain;IPR007699|SGS domain;IPR008978|HSP20-like chaperone;IPR011990|Tetratricopeptide-like helical domain superfamily;IPR013026|Tetratricopeptide repeat-containing domain;IPR019734|Tetratricopeptide repeat	C:cytoplasm;C:nucleus;F:protein binding;P:defense response to fungus;P:protein stabilization;P:regulation of defense response to fungus, incompatible interaction;P:regulation of protein stability	AT4G11260_SGT1B;AT4G23570_SGT1A	0	0	0	0	0	0	0	0	0	0
F2CZ65	metabolic process	ribosome	structural molecule activity	Pf01778	0	0	0	0	0	-1	0	0	0	0	0	0	0	0	0	0	0	0	1	0	0	0	0	1	0	1	1	HORVU3Hr1G066430		Predicted protein	NA	A0A287LFD2;A0A287LFD5;F2CZ65	IPR002672|Ribosomal protein L28e;IPR029004|Ribosomal L28e/Mak16	C:cytosolic large ribosomal subunit;C:integral component of membrane;C:intracellular;C:membrane;C:ribosome;F:structural constituent of ribosome;P:translation	AT2G19730_RPL28A;AT4G29410_RPL28C	0	0	0	0	0	0	0	0	0	0
A0A287LFM8					0	0	0	1	0	0	1	0	0	0	0	0	0	0	0	0	0	0	1	1	0	2	0	0	1	1	2	HORVU3Hr1G066800	HORVU.MOREX.r3.3HG0284020		NA	A0A287LFM0;A0A287LFM5;A0A287LFM6;A0A287LFM7;A0A287LFM8;A0A287LFN1;A0A287LFN2;A0A287LFN3;A0A287LFN5;A0A287LFN6;A0A287LFN7;A0A287LFN8;A0A287LFP0;A0A287LFP1;A0A287LFP3;A0A287LFP4;A0A287LFP5;A0A287LFP7;A0A287LFP9;A0A287LFQ5;A0A287LFQ9;A0A287LFR6	IPR000719|Protein kinase domain;IPR008271|Serine/threonine-protein kinase, active site;IPR011009|Protein kinase-like domain superfamily;|	C:cytoplasm;C:integral component of membrane;C:membrane;C:nucleus;F:ATP binding;F:protein kinase activity;F:protein serine/threonine kinase activity;P:peptidyl-serine phosphorylation;P:protein phosphorylation		0	0	0	0	0	0	0	0	0	0
M0YZ71				Pf04774	0	0	0	0	0	-1	0	0	0	0	0	0	0	0	0	0	0	0	1	0	0	0	0	1	0	1	1	HORVU3Hr1G068500	HORVU.MOREX.r3.3HG0285730		NA	A0A287LHF3;A0A287LHF4;A0A287LHF7;M0YZ71	IPR006861|Hyaluronan/mRNA-binding protein;IPR019084|Stm1-like, N-terminal;IPR039764|RNA binding protein HABP4/SERBP1	F:RNA binding	AT4G16830_RGGA;AT4G17520_RGGB;AT5G47210_RGGC	0	0	0	0	0	0	0	0	0	0
A0A287LIR7					1	1	1	1	0	1	1	0	0	1	0	1	1	1	1	0	0	0	5	3	3	5	2	4	7	4	11	HORVU3Hr1G069650	HORVU.MOREX.r3.3HG0286930		NA	A0A287LIP0;A0A287LIP7;A0A287LIR7	IPR004873|BURP domain		AT5G25610_RD22	0	0	0	1	0	0	0	0	0	0
A0A287LL06					0	0	0	0	0	0	0	0	0	-1	0	0	1	0	0	0	0	0	0	1	1	2	0	0	1	1	2	HORVU3Hr1G071530			NA	A0A287LL06	IPR005822|Ribosomal protein L13;IPR005823|Ribosomal protein L13, bacterial-type;IPR023563|Ribosomal protein L13, conserved site;IPR036899|Ribosomal protein L13 superfamily	C:cytosolic large ribosomal subunit;C:ribosome;F:mRNA binding;F:structural constituent of ribosome;P:negative regulation of translation;P:translation	AT1G78630_RPL13	0	0	0	0	0	0	0	0	0	0
A0A287LPJ5					0	0	0	-1	0	-1	0	0	0	0	0	0	0	0	0	0	0	0	2	0	0	1	0	1	0	2	2	HORVU3Hr1G074850	HORVU.MOREX.r3.3HG0291820		NA	A0A287LPH4;A0A287LPH5;A0A287LPH7;A0A287LPH9;A0A287LPI0;A0A287LPI1;A0A287LPI3;A0A287LPI5;A0A287LPI8;A0A287LPJ3;A0A287LPJ4;A0A287LPJ5;A0A287LPJ6;A0A287LPJ7;A0A287LPJ9;A0A287LPK1;A0A287LPK2;A0A287LPK4;A0A287LPK7;A0A287LPL2;M0YY30	IPR034581|Protein PLASTID TRANSCRIPTIONALLY ACTIVE 12	C:chloroplast;C:chloroplast nucleoid;C:nucleus;C:plastid chromosome;C:plastid-encoded plastid RNA polymerase complex;P:plastid transcription;P:positive regulation of red or far-red light signaling pathway;P:positive regulation of transcription, DNA-templated;P:regulation of transcription, DNA-templated;P:response to blue light;P:response to far red light;P:response to light stimulus;P:response to…	AT2G34640_PTAC12	0	0	0	0	0	0	0	0	0	0
A0A287LT80					0	0	0	0	0	0	0	0	0	0	0	0	0	0	0	1	0	1	0	0	2	1	0	1	0	2	2	HORVU3Hr1G078270	HORVU.MOREX.r3.3HG0294980		NA	A0A287LT77;A0A287LT80;A0A287LT84	IPR029030|Caspase-like domain superfamily;|		AT1G16420_AMC8;AT1G79310_AMC7;AT1G79320_AMC6;AT1G79330_AMC5;AT1G79340_AMC4	0	0	0	0	0	0	0	0	0	0
A0A287LTR2					0	0	0	0	0	0	0	0	0	0	0	0	0	0	0	0	1	0	0	0	1	0	1	0	0	1	1	HORVU3Hr1G078680	HORVU.MOREX.r3.3HG0295370	Cysteine proteinase inhibitor	NA	A0A287LTR2	IPR000010|Cystatin domain;IPR018073|Proteinase inhibitor I25, cystatin, conserved site;IPR027214|Cystatin	F:cysteine-type endopeptidase inhibitor activity;F:peptidase inhibitor activity;P:negative regulation of endopeptidase activity;P:negative regulation of peptidase activity	AT5G12140_CYS1	0	0	0	0	0	0	0	0	0	0
A0A287LW87					0	0	1	0	0	0	0	0	0	0	0	0	0	0	0	0	0	0	1	0	0	0	0	1	1	0	1	HORVU3Hr1G080530	HORVU.MOREX.r3.3HG0297100		NA	A0A287LW69;A0A287LW72;A0A287LW82;A0A287LW87;A0A287LWA2;A0A287LWA8;A0A287LWA9;M0WLI6	IPR005995|Phosphoglycerate mutase, 2,3-bisphosphoglycerate-independent;IPR006124|Metalloenzyme;IPR011258|BPG-independent PGAM, N-terminal;IPR017850|Alkaline-phosphatase-like, core domain superfamily;IPR036646|BPG-independent phosphoglycerate mutase, domain B superfamily	C:cytoplasm;F:2,3-bisphosphoglycerate-independent phosphoglycerate mutase activity;F:catalytic activity;F:manganese ion binding;F:metal ion binding;F:phosphoglycerate mutase activity;P:cellular carbohydrate metabolic process;P:glucose catabolic process	AT1G09780_PGM1;AT3G08590_	0	0	0	0	0	0	0	0	0	0
A0A287LZU9					0	0	0	0	0	0	0	0	0	0	0	0	0	0	0	0	0	1	0	0	1	0	0	1	0	1	1	HORVU3Hr1G083300	HORVU.MOREX.r3.3HG0299750		NA	A0A287LZT6;A0A287LZU9	IPR001163|LSM domain, eukaryotic/archaea-type;IPR010920|LSM domain superfamily;IPR034105|Sm-like protein Lsm3;IPR040002|U6 snRNA-associated Sm-like protein Lsm3	C:catalytic step 2 spliceosome;C:Lsm1-7-Pat1 complex;C:nucleus;C:P-body;C:precatalytic spliceosome;C:spliceosomal complex;C:U4/U6 x U5 tri-snRNP complex;C:U6 snRNP;F:RNA binding;P:cytoplasmic mRNA processing body assembly;P:mRNA processing;P:mRNA splicing, via spliceosome;P:nuclear-transcribed mRNA catabolic process;P:RNA splicing	AT1G21190_LSM3A;AT1G76860_LSM3B	0	0	0	0	0	0	0	0	0	0
A0A287LZW0					1	1	1	0	0	0	0	0	0	0	0	0	1	0	1	0	0	0	3	0	2	2	1	2	5	0	5	HORVU3Hr1G083350	HORVU.MOREX.r3.3HG0299820		NA	A0A287LZU2;A0A287LZU3;A0A287LZU7;A0A287LZU8;A0A287LZV1;A0A287LZV5;A0A287LZV6;A0A287LZV7;A0A287LZW0;A0A287LZW1;A0A287LZW9;A0A287LZY0;F2CZQ5	IPR000146|Fructose-1,6-bisphosphatase class 1;IPR000164|Histone H3/CENP-A;IPR001388|Synaptobrevin;IPR007125|Histone H2A/H2B/H3;IPR009072|Histone-fold;IPR010908|Longin domain;IPR011012|Longin-like domain superfamily;IPR028343|Fructose-1,6-bisphosphatase;IPR033391|Fructose-1-6-bisphosphatase class I, N-terminal	C:chromosome;C:integral component of membrane;C:membrane;C:nucleosome;C:nucleus;F:DNA binding;F:fructose 1,6-bisphosphate 1-phosphatase activity;F:hydrolase activity;F:phosphatase activity;F:protein heterodimerization activity;P:carbohydrate metabolic process;P:dephosphorylation;P:vesicle-mediated transport	AT5G65350_HTR11	0	0	0	0	0	0	0	0	0	0
M0UMZ9		membrane			0	0	0	0	0	0	0	0	0	0	0	0	0	0	0	0	0	-1	0	0	1	0	0	1	0	1	1	HORVU3Hr1G083790	HORVU.MOREX.r3.3HG0300330		NA	A0A287M048;A0A287M049;M0UMZ9	|	C:chloroplast;C:chloroplast stroma;C:chloroplast thylakoid membrane	AT2G36145_	0	0	0	0	0	0	0	0	0	0
A0A287M195					0	0	0	0	0	0	0	0	0	-1	0	0	0	0	0	0	0	0	0	1	0	1	0	0	0	1	1	HORVU3Hr1G085270	HORVU.MOREX.r3.3HG0301550		NA	A0A287M195;A0A287M1A0;A0A287M1A2;A0A287M1A7;A0A287M1B2;A0A287M1B4;A0A287M1B8;A0A287M1B9;A0A287M1C4;A0A287M1D0;F2CS83	IPR000146|Fructose-1,6-bisphosphatase class 1;IPR020548|Fructose-1,6-bisphosphatase, active site;IPR023079|Sedoheptulose-1,7-bisphosphatase;IPR033391|Fructose-1-6-bisphosphatase class I, N-terminal	C:apoplast;C:chloroplast envelope;C:chloroplast stroma;C:cytoplasm;C:thylakoid;F:fructose 1,6-bisphosphate 1-phosphatase activity;F:phosphatase activity;F:phosphoric ester hydrolase activity;F:sedoheptulose-bisphosphatase activity;P:carbohydrate metabolic process;P:defense response to bacterium;P:dephosphorylation;P:fructose 1,6-bisphosphate metabolic process;P:fructose 6-phosphate metabolic proc…	AT3G55800_SBPASE	0	0	0	-1	0	-1	0	0	0	0
A0A287M426					0	0	1	0	0	0	0	0	0	0	0	0	0	0	0	0	0	0	1	0	0	0	0	1	1	0	1	HORVU3Hr1G087380			NA	A0A287M417;A0A287M423;A0A287M424;A0A287M426	IPR005680|Ribosomal protein S23, eukaryotic/archaeal;IPR006032|Ribosomal protein S12/S23;IPR012340|Nucleic acid-binding, OB-fold	C:cytosolic small ribosomal subunit;C:ribosome;C:small ribosomal subunit;F:structural constituent of ribosome;P:translation	AT3G09680_RPS23A;AT5G02960_RPS23B	0	0	0	0	0	0	0	0	0	0
A0A287M563					0	0	0	0	0	0	0	0	0	0	0	0	0	0	0	-1	0	-1	0	0	2	1	0	1	0	2	2	HORVU3Hr1G088300	HORVU.MOREX.r3.3HG0304490		NA	A0A287M563;A0A287M565;A0A287M566;A0A287M574;F2E3L2	|			0	0	0	0	0	0	0	0	0	0
A0A287M875					1	1	1	0	0	0	0	0	0	0	0	0	0	0	0	0	0	0	3	0	0	1	1	1	3	0	3	HORVU3Hr1G090170	HORVU.MOREX.r3.3HG0306430		NA	A0A287M874;A0A287M875;A0A287M877;A0A287M879;A0A287M880;A0A287M882;A0A287M884;A0A287M885;A0A287M886;A0A287M887;A0A287M888;A0A287M894;M0XS01;M0XS02;M0XS03	IPR002347|Short-chain dehydrogenase/reductase SDR;IPR020904|Short-chain dehydrogenase/reductase, conserved site;IPR036291|NAD(P)-binding domain superfamily	F:oxidoreductase activity;P:oxidation-reduction process		0	0	0	0	0	0	0	0	0	0
A0A287M8N8					0	1	1	0	0	0	0	0	0	0	0	0	0	0	0	1	1	1	2	0	3	1	2	2	2	3	5	HORVU3Hr1G090560	HORVU.MOREX.r3.3HG0306730		NA	A0A287M8L6;A0A287M8M1;A0A287M8M3;A0A287M8M4;A0A287M8M5;A0A287M8M7;A0A287M8M8;A0A287M8M9;A0A287M8N1;A0A287M8N4;A0A287M8N8;A0A287M8N9;A0A287M8P3;A0A287M8P8;F2D816	IPR001228|2-C-methyl-D-erythritol 4-phosphate cytidylyltransferase;IPR018294|4-diphosphocytidyl-2C-methyl-D-erythritol synthase, conserved site;IPR029044|Nucleotide-diphospho-sugar transferases;IPR034683|Cytidylyltransferase IspD/TarI	C:chloroplast;C:chloroplast stroma;F:2-C-methyl-D-erythritol 4-phosphate cytidylyltransferase activity;F:catalytic activity;F:cytidylyltransferase activity;P:isoprenoid biosynthetic process	AT2G02500_ISPD	0	0	0	0	0	0	0	0	0	0
A0A287MAN7					0	0	1	0	0	0	0	0	0	0	0	0	0	0	0	0	0	0	1	0	0	0	0	1	1	0	1	HORVU3Hr1G092680	HORVU.MOREX.r3.3HG0308840		NA	A0A287MAN5;A0A287MAN7;A0A287MAN8;A0A287MAN9;A0A287MAP2;A0A287MAP3;A0A287MAP4;A0A287MAP6;A0A287MAQ1;A0A287MAQ5;A0A287MAR0	IPR015590|Aldehyde dehydrogenase domain;IPR016160|Aldehyde dehydrogenase, cysteine active site;IPR016161|Aldehyde/histidinol dehydrogenase;IPR016162|Aldehyde dehydrogenase, N-terminal;IPR016163|Aldehyde dehydrogenase, C-terminal;IPR029510|Aldehyde dehydrogenase, glutamic acid active site	F:aldehyde dehydrogenase (NAD) activity;F:oxidoreductase activity;F:oxidoreductase activity, acting on the aldehyde or oxo group of donors, NAD or NADP as acceptor;P:oxidation-reduction process	AT3G24503_ALDH2C4	0	0	0	0	0	0	0	0	0	0
M0V1W1	metabolic process		catalytic activity	Pf00254	0	0	0	0	0	-1	0	0	0	0	0	0	0	0	0	0	0	0	1	0	0	0	0	1	0	1	1	HORVU3Hr1G093290	HORVU.MOREX.r3.3HG0309520	Peptidylprolyl isomerase	NA	A0A287MBG8;A0A287MBG9;A0A287MBH1;A0A287MBH6;A0A287MBI0;M0V1W1	IPR001179|FKBP-type peptidyl-prolyl cis-trans isomerase domain;|	F:isomerase activity;F:peptidyl-prolyl cis-trans isomerase activity;P:protein peptidyl-prolyl isomerization	AT3G25220_FKBP15-1;AT5G48580_FKBP15-2	0	0	0	0	0	0	0	0	0	0
A0A287MDJ8					1	1	0	0	0	0	0	0	0	0	0	0	0	0	0	0	0	0	2	0	0	1	1	0	2	0	2	HORVU3Hr1G095330			NA	A0A287MDJ8;A0A287MDK5;A0A287MDL1	IPR001684|Ribosomal protein L27;IPR018261|Ribosomal protein L27, conserved site	C:chloroplast envelope;C:chloroplast stroma;C:intracellular;C:ribosome;C:thylakoid;F:structural constituent of ribosome;P:response to cytokinin;P:translation	AT5G40950_RPL27	0	0	0	0	0	0	0	0	0	0
A0A287MDR1					0	0	0	0	0	0	0	0	0	0	0	0	0	0	0	0	-1	0	0	0	1	0	1	0	0	1	1	HORVU3Hr1G095450	HORVU.MOREX.r3.3HG0311510		NA	A0A287MDR1;A0A287MDR4	IPR014876|DEK, C-terminal	C:nucleus;F:histone binding;P:regulation of double-strand break repair	AT3G48710_;AT5G63550_	0	0	0	0	0	0	0	0	0	0
M0XIA3	transport			Pf03398	0	0	0	0	0	-1	0	0	0	0	0	0	0	0	0	0	0	0	1	0	0	0	0	1	0	1	1	HORVU3Hr1G098720	HORVU.MOREX.r3.3HG0314300		NA	A0A287MGQ1;A0A287MGQ2;M0XIA2;M0XIA3	IPR005061|Vacuolar protein sorting-associated protein Ist1	P:protein localization;P:protein transport	AT1G34220_	0	0	0	0	0	0	0	0	0	0
M0X4B4					0	1	0	0	0	0	0	0	-1	0	0	0	1	1	1	0	0	0	1	1	3	1	2	2	5	0	5	HORVU3Hr1G117440	HORVU.MOREX.r3.3HG0330680		P32024	A0A287MUE6;M0X4B4	|			0	0	-1	0	0	0	0	0	0	0
M0VYW3	metabolic process;transport		metal ion binding	Pf00111	0	0	0	-1	0	-1	0	0	0	-1	0	0	0	0	0	0	0	0	2	1	0	2	0	1	0	3	3	HORVU4Hr1G002520	HORVU.MOREX.r3.4HG0333240	Ferredoxin	NA	M0VYW3	IPR001041|2Fe-2S ferredoxin-type iron-sulfur binding domain;IPR010241|Ferredoxin [2Fe-2S], plant;IPR012675|Beta-grasp domain superfamily;IPR036010|2Fe-2S ferredoxin-like superfamily	C:chloroplast;C:plastid;F:2 iron, 2 sulfur cluster binding;F:electron transfer activity;F:iron-sulfur cluster binding;F:metal ion binding;P:electron transport chain;P:oxidation-reduction process;P:response to high light intensity	AT4G14890_FdC2
A0A287MYU3					0	0	0	-1	0	0	0	0	0	0	0	0	0	0	0	0	0	0	1	0	0	1	0	0	0	1	1	HORVU4Hr1G003580	HORVU.MOREX.r3.4HG0334210		NA	A0A287MYS2;A0A287MYS5;A0A287MYS7;A0A287MYT5;A0A287MYU3;A0A287MYW3;A0A287MYW7;M0W5F0;M0W5F2	IPR002817|Phosphomethylpyrimidine synthase ThiC/5-hydroxybenzimidazole synthase BzaA/B;IPR037509|Phosphomethylpyrimidine synthase;IPR038521|ThiC/Bza superfamily	C:chloroplast;C:chloroplast stroma;C:plastid;F:ADP-ribose pyrophosphohydrolase activity;F:carbon-carbon lyase activity;F:iron-sulfur cluster binding;F:protein domain specific binding;P:response to vitamin B1;P:thiamine biosynthetic process	AT2G29630_THIC	0	0	0	0	0	0	0	0	0	0
A0A287N275					0	1	0	1	0	1	0	0	0	0	0	0	0	0	0	0	0	0	3	0	0	1	1	1	1	2	3	HORVU4Hr1G006320	HORVU.MOREX.r3.4HG0336150		NA	A0A287N229;A0A287N235;A0A287N240;A0A287N241;A0A287N245;A0A287N246;A0A287N250;A0A287N251;A0A287N256;A0A287N258;A0A287N261;A0A287N263;A0A287N266;A0A287N275;A0A287N278;A0A287N280;A0A287N281;A0A287N282;A0A287N285;A0A287N287;A0A287N292;A0A287N299;A0A287N2A4;M0UUA8;M0UUA9	IPR006786|Pinin/SDK/MemA protein;IPR039853|Pinin	C:catalytic step 2 spliceosome;C:cell-cell junction;P:cell adhesion	AT1G15200_	0	0	0	0	0	0	0	0	0	0
A0A287N3F8					0	0	0	1	0	0	0	0	0	0	0	0	0	0	0	0	0	0	1	0	0	1	0	0	0	1	1	HORVU4Hr1G007540	HORVU.MOREX.r3.4HG0337140		NA	A0A287N3B1;A0A287N3B6;A0A287N3C3;A0A287N3C8;A0A287N3F4;A0A287N3F8;A0A287N3H0;A0A287N3H1;A0A287N3H5;A0A287N3H6	IPR000719|Protein kinase domain;IPR000961|AGC-kinase, C-terminal;IPR008271|Serine/threonine-protein kinase, active site;IPR011009|Protein kinase-like domain superfamily;|	F:ATP binding;F:kinase activity;F:nucleotide binding;F:protein kinase activity;F:protein serine/threonine kinase activity;F:transferase activity;P:intracellular signal transduction;P:peptidyl-serine phosphorylation;P:phosphorylation;P:protein phosphorylation	AT1G48490_;AT3G17850_IREH1	0	0	0	0	0	0	0	0	0	0
A0A287N7H2					0	1	1	0	0	0	0	0	0	0	0	0	1	0	0	0	0	0	2	0	1	1	1	1	3	0	3	HORVU4Hr1G011280	HORVU.MOREX.r3.4HG0340560		NA	A0A287N7C2;A0A287N7H2;M0Z0Z8	IPR000644|CBS domain;|	C:cell;C:mitochondrion;F:cobalt ion binding;P:cell redox homeostasis;P:response to salt stress	AT5G10860_CBSX3	0	0	0	0	0	0	0	0	0	0
A0A287N7L4					0	0	1	0	0	0	0	0	0	0	0	0	1	0	0	0	0	0	1	0	1	1	0	1	2	0	2	HORVU4Hr1G011500	HORVU.MOREX.r3.4HG0340820	Serine hydroxymethyltransferase	NA	A0A287N7J6;A0A287N7K1;A0A287N7L4;A0A287N7L8;A0A287N7M4;A0A287N7P9;A0A287N7Q4;A0A287N7V8;A0A287N7W0;A0A287N800;A0A287N805	IPR001085|Serine hydroxymethyltransferase;IPR015421|Pyridoxal phosphate-dependent transferase, major domain;IPR015422|Pyridoxal phosphate-dependent transferase domain 1;IPR015424|Pyridoxal phosphate-dependent transferase;IPR019798|Serine hydroxymethyltransferase, pyridoxal phosphate binding site;IPR039429|Serine hydroxymethyltransferase-like domain;|	F:amino acid binding;F:catalytic activity;F:cobalt ion binding;F:glycine hydroxymethyltransferase activity;F:pyridoxal phosphate binding;F:serine binding;F:transferase activity;F:zinc ion binding;P:cellular response to tetrahydrofolate;P:folic acid metabolic process;P:glycine biosynthetic process from serine;P:glycine metabolic process;P:L-serine catabolic process;P:one-carbon metabolic process;P…	AT4G37930_SHM1;AT5G26780_SHM2	0	0	0	-1	0	-1	0	0	0	0
A0A287NBZ8					0	0	0	0	0	0	0	0	0	-1	0	0	0	0	0	0	0	-1	0	1	1	1	0	1	0	2	2	HORVU4Hr1G015260		Chlorophyll a-b binding protein, chloroplastic	NA	A0A287NBW6;A0A287NBZ8;A0A287NC33;A0A287NCD4;A0A287NCF4;A0A287NCF8;M0X4T7;Q40039	IPR001344|Chlorophyll A-B binding protein, plant;IPR022796|Chlorophyll A-B binding protein;IPR023329|Chlorophyll a/b binding domain superfamily;|	C:chloroplast;C:chloroplast thylakoid membrane;C:integral component of membrane;C:membrane;C:photosystem I;C:photosystem II;C:plastid;C:plastoglobule;C:thylakoid;F:chlorophyll binding;P:photosynthesis;P:photosynthesis, light harvesting;P:photosynthesis, light harvesting in photosystem I;P:protein-chromophore linkage;P:response to light stimulus	AT4G10340_LHCB5	0	0	0	-1	0	-1	0	0	0	0
A0A287NH13					0	0	0	0	0	0	0	0	0	0	0	0	0	0	0	1	0	1	0	0	2	1	0	1	0	2	2	HORVU4Hr1G020160		Cytochrome b-c1 complex subunit 6	NA	A0A287NGX8;A0A287NH13;A0A287NHC2	IPR003422|Cytochrome b-c1 complex, subunit 6;IPR023184|Ubiquinol-cytochrome C reductase hinge domain;IPR036811|Ubiquinol-cytochrome C reductase hinge domain superfamily;|	C:membrane;C:mitochondrial inner membrane;C:mitochondrial respiratory chain complex III;C:mitochondrion;C:respirasome;F:ubiquinol-cytochrome-c reductase activity;P:aerobic respiration;P:mitochondrial electron transport, ubiquinol to cytochrome c;P:oxidation-reduction process	AT1G15120_;AT2G01090_	0	0	0	0	0	0	0	0	0	0
F2D355	metabolic process	ribosome	structural molecule activity	Pf00380	-1	0	0	0	0	0	0	0	0	0	0	0	0	0	0	0	0	1	1	0	1	1	0	1	1	1	2	HORVU4Hr1G023530		Predicted protein	NA	A0A0U2IGV8;A0A287NJC2;F2D355	IPR000754|Ribosomal protein S9;IPR014721|Ribosomal protein S5 domain 2-type fold, subgroup;IPR020568|Ribosomal protein S5 domain 2-type fold;IPR020574|Ribosomal protein S9, conserved site	C:cytosolic small ribosomal subunit;C:ribosome;C:small ribosomal subunit;F:RNA binding;F:structural constituent of ribosome;P:maturation of SSU-rRNA from tricistronic rRNA transcript (SSU-rRNA, 5.8S rRNA, LSU-rRNA);P:translation	AT2G09990_RPS16A;AT3G04230_RPS16B;AT5G18380_RPS16C	0	0	0	0	0	0	0	0	0	0
B1NC18	cellular homeostasis;metabolic process;transport		catalytic activity;metal ion binding	Pf00210	0	0	0	0	0	0	0	0	0	0	0	0	0	0	0	1	1	0	0	0	2	1	1	0	0	2	2	HORVU4Hr1G024570	HORVU.MOREX.r3.4HG0354610	Ferritin	NA	A0A287NK66;A0A287NK82;A0A287NKI9;A0A287NKM4;B1NC18;Q945F6	IPR001519|Ferritin;IPR008331|Ferritin/DPS protein domain;IPR009040|Ferritin-like diiron domain;IPR009078|Ferritin-like superfamily;IPR012347|Ferritin-like;IPR014034|Ferritin, conserved site	C:cell;C:chloroplast stroma;C:chloroplast thylakoid membrane;C:cytoplasm;C:mitochondrion;F:ferric iron binding;F:ferrous iron binding;F:ferroxidase activity;F:iron ion binding;F:metal ion binding;F:oxidoreductase activity;F:protein domain specific binding;P:cellular iron ion homeostasis;P:flower development;P:intracellular sequestering of iron ion;P:iron ion transport;P:leaf development;P:oxidati…	AT2G40300_FER4;AT3G11050_FER2;AT3G56090_FER3	0	0	0	0	0	0	0	0	0	0
A0A287NMB4					0	0	0	1	0	0	0	0	0	0	0	0	1	1	1	0	0	0	1	0	3	2	1	1	3	1	4	HORVU4Hr1G026720	HORVU.MOREX.r3.4HG0356810		NA	A0A287NMB4;A0A287NMC1;A0A287NMH6;A0A287NMI1;A0A287NMP1;A0A287NMQ0;A0A287NMQ4;H9NHF6;M0W6H2;M0W6H3;Q9ATV7	IPR008979|Galactose-binding-like domain superfamily;IPR010720|Alpha-L-arabinofuranosidase, C-terminal;IPR013780|Glycosyl hydrolase, all-beta;IPR017853|Glycoside hydrolase superfamily	F:alpha-L-arabinofuranosidase activity;F:hydrolase activity;P:L-arabinose metabolic process	AT3G10740_ASD1;AT5G26120_ASD2	0	0	0	0	0	0	0	0	0	0
A0A287NN35					0	0	0	0	0	0	0	0	0	0	0	0	0	0	0	0	1	0	0	0	1	0	1	0	0	1	1	HORVU4Hr1G027260	HORVU.MOREX.r3.4HG0357430		Q40073;Q42450	A0A287NMP7;A0A287NMQ3;A0A287NMQ8;A0A287NMR2;A0A287NMR3;A0A287NMR6;A0A287NMW1;A0A287NMW7;A0A287NN27;A0A287NN30;A0A287NN32;A0A287NN35;A0A287NN38;A0A287NN40;A8R7E4;E3WDK8;M0YMH1;M0YMH2	IPR003959|ATPase, AAA-type, core;IPR027417|P-loop containing nucleoside triphosphate hydrolase	C:chloroplast;C:chloroplast stroma;C:plastid;C:thylakoid;F:ATP binding;F:nucleotide binding;F:ribulose-1,5-bisphosphate carboxylase/oxygenase activator activity;P:positive regulation of catalytic activity	AT2G39730_RCA	0	0	0	-1	0	0	0	0	0	0
A0A287NUN2					1	0	0	0	0	0	1	0	0	0	0	0	0	0	0	0	0	0	1	1	0	2	0	0	2	0	2	HORVU4Hr1G039870	HORVU.MOREX.r3.4HG0370520		NA	A0A287NUG3;A0A287NUN2;A0A287NV64	|		AT3G55760_	0	0	0	0	0	0	0	0	0	0
A0A218LNH5	metabolic process	ribosome	structural molecule activity	Pf00318	0	0	0	0	0	0	0	0	0	0	0	0	0	0	-1	-1	0	-1	0	0	3	1	0	2	1	2	3	HORVU4Hr1G045360		30S ribosomal protein S2, chloroplastic	NA	A0A218LNH5;S4Z887	IPR001865|Ribosomal protein S2;IPR005706|Ribosomal protein S2, bacteria/mitochondria/plastid;IPR018130|Ribosomal protein S2, conserved site;IPR023591|Ribosomal protein S2, flavodoxin-like domain superfamily	C:chloroplast;C:intracellular;C:mitochondrial small ribosomal subunit;C:plastid;C:ribosome;C:small ribosomal subunit;F:structural constituent of ribosome;P:translation	ATCG00160_RPS2	0	0	0	0	0	0	0	0	0	0
A0A287NYJ2					0	0	-1	0	0	0	0	0	-1	0	0	0	-1	-1	0	0	0	0	1	1	2	1	1	2	4	0	4	HORVU4Hr1G048440	HORVU.MOREX.r3.4HG0376960	Predicted protein	NA	A0A287NYE3;A0A287NYJ2;A0A287NYS7;F2CU13	IPR000504|RNA recognition motif domain;IPR012677|Nucleotide-binding alpha-beta plait domain superfamily;IPR035979|RNA-binding domain superfamily	C:nucleus;C:ribonucleoprotein complex;F:mRNA binding;F:nucleic acid binding;F:RNA binding;P:regulation of RNA metabolic process		0	0	0	0	0	0	0	0	0	0
F2DIC8				Pf14200	0	0	0	1	0	0	0	0	0	0	0	0	0	0	0	0	0	0	1	0	0	1	0	0	0	1	1	HORVU4Hr1G051320	HORVU.MOREX.r3.4HG0379640		NA	A0A287P0S6;A0A287P144;A0A287P1X3;F2DIC8	IPR000772|Ricin B, lectin domain;IPR035992|Ricin B-like lectins;IPR040249|Ricin B-like lectin EULS3-like		AT2G39050_EULS3	0	0	0	0	0	0	0	0	0	0
A0A287P2R3					0	0	1	0	0	0	0	0	0	0	0	0	0	0	0	0	1	0	1	0	1	0	1	1	1	1	2	HORVU4Hr1G052990	HORVU.MOREX.r3.4HG0381740		NA	A0A287P296;A0A287P2A2;A0A287P2A7;A0A287P2B2;A0A287P2C2;A0A287P2D2;A0A287P2D3;A0A287P2D6;A0A287P2E1;A0A287P2E3;A0A287P2E7;A0A287P2E8;A0A287P2F3;A0A287P2F7;A0A287P2F8;A0A287P2G1;A0A287P2G3;A0A287P2G6;A0A287P2G8;A0A287P2H1;A0A287P2H3;A0A287P2H6;A0A287P2H8;A0A287P2I1;A0A287P2I3;A0A287P2I6;A0A287P2I7;A0A287P2J6;A0A287P2K1;A0A287P2K6;A0A287P2N4;A0A287P2N9;A0A287P2P4;A0A287P2Q4;A0A287P2Q8;A0A287P2R3;A0A…	IPR000033|LDLR class B repeat;IPR001258|NHL repeat;IPR006439|HAD hydrolase, subfamily IA;IPR011042|Six-bladed beta-propeller, TolB-like;IPR012336|Thioredoxin-like fold;IPR013017|NHL repeat, subgroup;IPR013766|Thioredoxin domain;IPR023198|Phosphoglycolate phosphatase-like, domain 2;IPR023214|HAD superfamily;IPR036249|Thioredoxin-like superfamily;IPR036412|HAD-like superfamily;IPR041492|Haloacid de…	C:cell;C:chloroplast;C:chloroplast stroma;C:chloroplast thylakoid;C:integral component of membrane;C:membrane;C:thylakoid membrane;F:hydrolase activity;F:protein binding;P:cell redox homeostasis;P:nonphotochemical quenching	AT1G56500_SOQ1	0	0	0	0	0	0	0	0	0	0
A0A287P420					0	1	0	1	0	0	0	0	0	1	0	1	0	0	0	0	0	0	2	2	0	2	1	1	1	3	4	HORVU4Hr1G054870	HORVU.MOREX.r3.4HG0383530		NA	A0A287P3W9;A0A287P409;A0A287P420;A0A287P424;A0A287P4B4;M0X653;M0Z8T3	IPR000916|Bet v I/Major latex protein;IPR023393|START-like domain superfamily;IPR024949|Bet v I type allergen	C:cytoplasm;C:nucleus;F:abscisic acid binding;F:protein phosphatase inhibitor activity;F:signaling receptor activity;P:abscisic acid-activated signaling pathway;P:defense response;P:negative regulation of phosphoprotein phosphatase activity;P:regulation of protein serine/threonine phosphatase activity;P:response to biotic stimulus		0	0	0	1	0	0	1	0	0	1
F2DLQ1			RNA binding	Pf00076, Pf13893, Pf14259	0	0	0	0	0	0	0	0	0	0	0	0	0	0	-1	0	0	0	0	0	1	0	0	1	1	0	1	HORVU4Hr1G055040	HORVU.MOREX.r3.4HG0383660	Predicted protein	NA	F2DLQ1	IPR000504|RNA recognition motif domain;IPR012677|Nucleotide-binding alpha-beta plait domain superfamily;IPR035979|RNA-binding domain superfamily	C:U2 snRNP;F:nucleic acid binding;F:RNA binding;P:mRNA splicing, via spliceosome	AT1G06960_;AT2G30260_U2B''	0	0	0	0	0	0	0	0	0	0
Q949H0	metabolic process	ribosome	structural molecule activity	Pf01251	0	0	0	0	0	0	0	0	0	0	0	0	1	0	1	0	0	0	0	0	2	1	0	1	2	0	2	HORVU4Hr1G055230		40S ribosomal protein S7	Q949H0	A0A287P4C4;A0A287P4E5;A0A287P4P9;A0A287P5J6;A0A287P5K1;M0WY98	IPR000554|Ribosomal protein S7e	C:cytosolic small ribosomal subunit;C:intracellular;C:ribosome;C:small-subunit processome;F:structural constituent of ribosome;P:ribosomal small subunit biogenesis;P:rRNA processing;P:translation	AT1G48830_RPS7A;AT3G02560_RPS7B;AT5G16130_RPS7C	0	0	0	0	0	0	0	0	0	0
M0Y1I9			protein binding	Pf00043, Pf13409, Pf13410, Pf13417, Pf14497	0	0	0	0	0	0	0	0	0	0	0	0	0	0	0	1	1	1	0	0	3	1	1	1	0	3	3	HORVU4Hr1G057890	HORVU.MOREX.r3.4HG0386180		NA	A0A0U2I2F3;A0A287P6X8;A0A287P6Y3;A0A287P6Y8;A0A287P710;A0A287P711;A0A287P715;A0A287P7D7;A0A287P7E2;A0A287P7E7;A0A287P869;A0A287P874;M0Y1I9	IPR004045|Glutathione S-transferase, N-terminal;IPR010987|Glutathione S-transferase, C-terminal-like;IPR036249|Thioredoxin-like superfamily;IPR036282|Glutathione S-transferase, C-terminal domain superfamily;IPR040079|Glutathione Transferase family;|	F:protein binding;F:transferase activity;P:protein glutathionylation	AT3G55040_GSTL2	0	0	0	0	0	0	0	0	0	0
A0A287PAL8					0	0	0	1	1	1	1	0	1	0	0	0	0	0	0	0	0	0	3	2	0	2	1	2	2	3	5	HORVU4Hr1G061170	HORVU.MOREX.r3.4HG0389850		NA	A0A287PA57;A0A287PAL8;M0W1U5	IPR000433|Zinc finger, ZZ-type;IPR002048|EF-hand domain;IPR011990|Tetratricopeptide-like helical domain superfamily;IPR011992|EF-hand domain pair;IPR013026|Tetratricopeptide repeat-containing domain;IPR019734|Tetratricopeptide repeat	C:plasma membrane;F:calcium ion binding;F:protein binding;F:zinc ion binding	AT1G05150_;AT2G32450_	0	0	0	0	0	0	0	0	0	0
A0A287PBY3					1	1	1	1	0	1	0	0	0	0	0	0	0	0	-1	1	1	1	5	0	4	3	2	4	4	5	9	HORVU4Hr1G062940	HORVU.MOREX.r3.4HG0391600		NA	A0A287PBG9;A0A287PBH7;A0A287PBJ5;A0A287PBJ8;A0A287PBY3;A0A287PCM8;M0WMB6	IPR002048|EF-hand domain;IPR011992|EF-hand domain pair;IPR018247|EF-Hand 1, calcium-binding site;|	F:calcium ion binding		0	0	0	0	0	0	0	0	0	0
M0WWY8	cell organization and biogenesis		RNA binding	Pf00472	0	0	0	0	0	0	0	0	0	0	0	0	0	0	0	0	0	1	0	0	1	0	0	1	0	1	1	HORVU4Hr1G063020	HORVU.MOREX.r3.4HG0391760		NA	A0A287PBK1;A0A287PBK7;A0A287PBL1;A0A287PBL6;A0A287PBN0;A0A287PBN2;A0A287PBN5;A0A287PBN7;A0A287PBP3;A0A287PC16;A0A287PC24;A0A287PCR0;A0A287PCR5;A0A287PCS0;F2DCA8;M0WWY8	IPR000352|Peptide chain release factor class I/class II;|	F:translation release factor activity;P:translational termination	AT1G62850_	0	0	0	0	0	0	0	0	0	0
Q9M4B1	metabolic process		catalytic activity;metal ion binding	Pf00067	0	0	0	0	0	0	0	0	0	0	0	0	1	1	1	0	1	0	0	0	4	1	2	1	3	1	4	HORVU4Hr1G066230	HORVU.MOREX.r3.4HG0394970		NA	M0ZBM5;Q9M4B1	IPR001128|Cytochrome P450;IPR036396|Cytochrome P450 superfamily	F:heme binding;F:hydroperoxide dehydratase activity;F:iron ion binding;F:lyase activity;F:monooxygenase activity;F:oxidoreductase activity;F:oxidoreductase activity, acting on paired donors, with incorporation or reduction of molecular oxygen;P:oxidation-reduction process;P:sterol metabolic process		0	0	0	0	0	0	0	0	0	0
A0A287PFD1					0	0	0	0	0	0	0	0	0	-1	0	-1	0	0	0	0	0	-1	0	2	1	1	0	2	0	3	3	HORVU4Hr1G066860	HORVU.MOREX.r3.4HG0395540	Glutamine synthetase	NA	A0A287PFC6;A0A287PFD1;A0A287PFE4;A0A287PFH8;A0A287PFS1;A0A287PFS6;A0A287PGE7;A0A287PGF2;K7X0F7	IPR008146|Glutamine synthetase, catalytic domain;IPR008147|Glutamine synthetase, beta-Grasp domain;IPR014746|Glutamine synthetase/guanido kinase, catalytic domain;IPR027302|Glutamine synthetase, N-terminal conserved site;IPR027303|Glutamine synthetase, glycine-rich site;IPR036651|Glutamine synthetase, N-terminal domain superfamily	F:ATP binding;F:catalytic activity;F:glutamate-ammonia ligase activity;F:ligase activity;F:nucleotide binding;P:glutamine biosynthetic process;P:nitrogen compound metabolic process	AT1G48470_GLN1-5;AT3G17820_GLN1-3	0	0	0	0	0	0	0	0	0	0
M0USA1	metabolic process		catalytic activity	Pf00160	0	0	0	1	0	1	0	0	0	1	0	1	0	0	0	0	0	0	2	2	0	2	0	2	0	4	4	HORVU4Hr1G070330	HORVU.MOREX.r3.4HG0398950		NA	A0A287PJG4;A0A287PJH6;A0A287PJJ5;M0USA0;M0USA1	IPR002130|Cyclophilin-type peptidyl-prolyl cis-trans isomerase domain;IPR003613|U box domain;IPR013083|Zinc finger, RING/FYVE/PHD-type;IPR020892|Cyclophilin-type peptidyl-prolyl cis-trans isomerase, conserved site;IPR029000|Cyclophilin-like domain superfamily	C:nucleus;F:peptidyl-prolyl cis-trans isomerase activity;F:ubiquitin-protein transferase activity;F:ubiquitin-ubiquitin ligase activity;P:protein folding;P:protein peptidyl-prolyl isomerization;P:protein polyubiquitination;P:protein ubiquitination	AT5G67530_CYP65	0	0	0	0	0	0	0	0	0	0
A0A287PMF6					-1	0	0	0	0	0	0	0	0	0	0	0	0	0	0	1	1	0	1	0	2	2	1	0	1	2	3	HORVU4Hr1G072930	HORVU.MOREX.r3.4HG0401520		NA	A0A287PMF6;A0A287PNE0	IPR011013|Galactose mutarotase-like domain superfamily;IPR014718|Glycoside hydrolase-type carbohydrate-binding;|	C:chloroplast;C:chloroplast thylakoid;C:chloroplast thylakoid membrane;C:NAD(P)H dehydrogenase complex (plastoquinone);F:carbohydrate binding;F:catalytic activity;P:carbohydrate metabolic process;P:photosynthetic electron transport in photosystem I	AT1G64770_NDF2	0	0	0	0	0	0	0	0	0	0
A0A287PQQ9					0	0	0	0	0	0	0	0	0	0	0	0	0	0	0	-1	0	0	0	0	1	1	0	0	0	1	1	HORVU4Hr1G076720	HORVU.MOREX.r3.4HG0405080		NA	A0A287PQK8;A0A287PQL3;A0A287PQP2;A0A287PQP7;A0A287PQQ9;A0A287PQR4;A0A287PQR9;A0A287PQV5;A0A287PQW0;A0A287PRP1;A0A287PRQ2	IPR002625|Smr domain;IPR009818|Ataxin-2, C-terminal;IPR036063|Smr domain superfamily		AT2G26280_CID7	0	0	0	0	0	0	0	0	0	0
A0A287PUW7					0	-1	0	0	0	0	0	0	0	0	0	0	0	0	-1	0	0	0	1	0	1	0	1	1	2	0	2	HORVU4Hr1G080560			NA	A0A287PU01;A0A287PU03;A0A287PU05;A0A287PU13;A0A287PUW7	IPR021788|Protein CHAPERONE-LIKE PROTEIN OF POR1-like	C:integral component of membrane;C:membrane	AT2G20920_	0	0	0	0	0	0	0	0	0	0
A0A287PUS9					0	0	0	1	1	1	0	0	0	0	0	1	0	0	0	0	0	1	3	1	1	1	1	3	0	5	5	HORVU4Hr1G081670	HORVU.MOREX.r3.4HG0409670		NA	A0A287PUP9;A0A287PUR2;A0A287PUR6;A0A287PUS9;A0A287PUT4;A0A287PVM3	IPR000778|Cytochrome b245, heavy chain;IPR002048|EF-hand domain;IPR011992|EF-hand domain pair;IPR013112|FAD-binding 8;IPR013121|Ferric reductase, NAD binding domain;IPR013130|Ferric reductase transmembrane component-like domain;IPR013623|NADPH oxidase Respiratory burst;IPR017927|FAD-binding domain, ferredoxin reductase-type;IPR017938|Riboflavin synthase-like beta-barrel;IPR018247|EF-Hand 1, calci…	C:integral component of membrane;C:membrane;C:plasma membrane;F:calcium ion binding;F:NAD(P)H oxidase activity;F:oxidoreductase activity;F:oxidoreductase activity, acting on NAD(P)H, oxygen as acceptor;F:peroxidase activity;P:cellular oxidant detoxification;P:oxidation-reduction process	AT4G25090_RBOHG;AT5G07390_RBOHA;AT5G47910_RBOHD;AT5G51060_RBOHC	0	0	0	0	0	0	0	0	0	0
F2CVM1	metabolic process;response to stimulus		antioxidant activity;catalytic activity;metal ion binding	Pf00199, Pf06628	0	0	1	0	0	0	0	0	0	0	0	0	1	0	0	0	0	0	1	0	1	1	0	1	2	0	2	HORVU4Hr1G082040	HORVU.MOREX.r3.4HG0409940	Catalase	P55307	A0A287PV21;A0A287PV31;A0A287PV33;A0A287PV36;A0A287PV38;A0A287PV59;A0A287PVY8;A0A287PVZ5;F2CVM1;Q71VA1	IPR002226|Catalase haem-binding site;IPR010582|Catalase immune-responsive domain;IPR011614|Catalase core domain;IPR018028|Catalase, mono-functional, haem-containing;IPR020835|Catalase superfamily;IPR024708|Catalase active site;IPR024711|Catalase, mono-functional, haem-containing, clades 1 and 3;IPR037060|Catalase core domain superfamily	C:cell;C:cytoplasm;C:glyoxysome;C:peroxisome;C:plasma membrane;F:catalase activity;F:heme binding;F:metal ion binding;F:oxidoreductase activity;F:peroxidase activity;P:cell redox homeostasis;P:cellular oxidant detoxification;P:circadian rhythm;P:hydrogen peroxide biosynthetic process;P:hydrogen peroxide catabolic process;P:nitric oxide homeostasis;P:oxidation-reduction process;P:protein nitrosyla…		0	0	0	0	0	0	0	0	0	0
A0A287PW00					0	0	0	0	1	0	0	0	0	0	0	0	0	0	0	0	0	0	1	0	0	0	1	0	0	1	1	HORVU4Hr1G082050	HORVU.MOREX.r3.4HG0409910		NA	A0A287PV27;A0A287PV32;A0A287PV37;A0A287PV41;A0A287PV43;A0A287PV46;A0A287PV48;A0A287PV51;A0A287PV53;A0A287PV64;A0A287PV68;A0A287PV73;A0A287PW00;A0A287PW08;A0A287PW12	IPR000626|Ubiquitin domain;IPR006636|Heat shock chaperonin-binding;IPR009060|UBA-like superfamily;IPR015496|Ubiquilin;IPR015940|Ubiquitin-associated domain;IPR019954|Ubiquitin conserved site;IPR029071|Ubiquitin-like domain superfamily	C:cytosol;C:integral component of membrane;C:membrane;F:polyubiquitin modification-dependent protein binding;F:protein binding;P:ubiquitin-dependent protein catabolic process	AT2G17190_DSK2A;AT2G17200_DSK2B	0	0	0	0	0	0	0	0	0	0
A0A287PVL0					0	0	0	0	1	0	0	0	0	0	0	0	1	0	0	0	0	0	1	0	1	1	1	0	1	1	2	HORVU4Hr1G082570	HORVU.MOREX.r3.4HG0410390		NA	A0A287PVL0	IPR008698|NADH:ubiquinone oxidoreductase, B18 subunit	C:mitochondrial respiratory chain complex I;C:mitochondrion;F:NADH dehydrogenase (ubiquinone) activity;F:NADH dehydrogenase activity;P:oxidation-reduction process	AT2G02050_	0	0	0	0	0	0	0	0	0	0
A0A287Q1Q5					0	0	1	0	0	0	0	0	0	0	0	0	0	0	0	0	1	0	1	0	1	0	1	1	1	1	2	HORVU4Hr1G087760	HORVU.MOREX.r3.4HG0415490		NA	A0A287Q1Q5	IPR016140|Bifunctional inhibitor/plant lipid transfer protein/seed storage helical domain;IPR027923|Hydrophobic seed protein domain;IPR036312|Bifunctional inhibitor/plant lipid transfer protein/seed storage helical domain superfamily		AT1G12090_ELP;AT1G62510_;AT4G12470_AZI1;AT4G12480_EARLI1;AT4G12490_;AT4G12500_;AT4G12510_;AT4G12520_;AT4G12545_AIR1B;AT4G12550_AIR1;AT4G22460_;AT5G46890_;AT5G46900_	-1	0	-1	0	0	0	0	0	0	0
A0A287Q4P7					0	0	0	-1	0	0	0	0	0	0	0	0	1	1	1	0	0	0	1	0	3	2	1	1	3	1	4	HORVU4Hr1G090300	HORVU.MOREX.r3.4HG0418700		NA	A0A287Q4C6;A0A287Q4D2;A0A287Q4D3;A0A287Q4D7;A0A287Q4P7;A0A287Q4Q3;A0A287Q513;A0A287Q518	IPR001533|Pterin 4 alpha carbinolamine dehydratase;IPR036428|Pterin 4 alpha carbinolamine dehydratase superfamily	C:integral component of membrane;C:membrane;C:plastid;F:4-alpha-hydroxytetrahydrobiopterin dehydratase activity;P:tetrahydrobiopterin biosynthetic process		0	0	0	0	0	0	0	0	0	0
A0A287Q5P4					0	0	0	0	1	0	0	0	0	0	0	0	0	-1	0	0	-1	-1	1	0	3	0	3	1	1	3	4	HORVU4Hr1G090890	HORVU.MOREX.r3.1HG0023870		NA	A0A287Q5D6;A0A287Q5P4	IPR021659|NADH dehydrogenase-like complex, subunit S	P:photosynthetic electron transport chain		0	0	0	0	0	0	0	0	0	0
M0Y1R9	metabolic process		catalytic activity;metal ion binding;protein binding	Pf00305, Pf01477	0	0	0	-1	0	-1	0	0	0	0	0	0	0	0	0	0	1	0	2	0	1	1	1	1	0	3	3	HORVU5Hr1G001180	HORVU.MOREX.r3.5HG0420500	Lipoxygenase	P93184	A0A287Q6E4;A0A287Q6E7;A0A287Q6F0;A0A287Q6Q8;A0A287Q734;A0A287Q737;M0Y1R9;M0Y1S0	IPR000907|Lipoxygenase;IPR001024|PLAT/LH2 domain;IPR001246|Lipoxygenase, plant;IPR013819|Lipoxygenase, C-terminal;IPR020833|Lipoxygenase, iron binding site;IPR020834|Lipoxygenase, conserved site;IPR027433|Lipoxygenase, domain 3;IPR036226|Lipoxigenase, C-terminal domain superfamily;IPR036392|PLAT/LH2 domain superfamily;IPR042057|Plant lipoxygenase, PLAT/LH2 domain;|	C:chloroplast;C:plastid;F:dioxygenase activity;F:linoleate 13S-lipoxygenase activity;F:metal ion binding;F:oxidoreductase activity;F:oxidoreductase activity, acting on single donors with incorporation of molecular oxygen, incorporation of two atoms of oxygen;F:protein binding;P:fatty acid biosynthetic process;P:fatty acid metabolic process;P:lipid metabolic process;P:oxidation-reduction process;P…		0	0	0	-1	0	-1	0	0	0	0
M0WSH7	cell organization and biogenesis;metabolic process;regulation of biological process		catalytic activity;enzyme regulator activity	Pf01095, Pf04043	0	0	0	1	0	0	0	0	0	0	0	0	0	0	0	0	0	0	1	0	0	1	0	0	0	1	1	HORVU5Hr1G010860	HORVU.MOREX.r3.5HG0429360		NA	A0A287QBV2;A0A287QBV4;A0A287QBV9;A0A287QBY8;A0A287QBZ3;A0A287QC67;A0A287QC72;A0A287QCH0;M0WSH7	IPR000070|Pectinesterase, catalytic;IPR006501|Pectinesterase inhibitor domain;IPR011050|Pectin lyase fold/virulence factor;IPR012334|Pectin lyase fold;IPR033131|Pectinesterase, Asp active site;IPR035513|Invertase/pectin methylesterase inhibitor domain superfamily	C:cell wall;F:aspartyl esterase activity;F:enzyme inhibitor activity;F:hydrolase activity;F:pectinesterase activity;F:pectinesterase inhibitor activity;P:cell wall modification;P:negative regulation of catalytic activity;P:pectin catabolic process	AT2G47670_PMEI6;AT3G62820_	0	0	0	0	0	0	0	0	0	0
A0A287QEG7					0	0	1	-1	0	-1	0	0	0	0	0	0	1	0	0	0	0	0	3	0	1	2	0	2	2	2	4	HORVU5Hr1G013200		Chlorophyll a-b binding protein, chloroplastic	NA	A0A287QEG7	IPR001344|Chlorophyll A-B binding protein, plant;IPR022796|Chlorophyll A-B binding protein;IPR023329|Chlorophyll a/b binding domain superfamily	C:chloroplast;C:chloroplast envelope;C:chloroplast thylakoid membrane;C:integral component of membrane;C:membrane;C:photosystem I;C:photosystem II;C:plastid;C:plastoglobule;C:thylakoid;F:chlorophyll binding;P:photosynthesis;P:photosynthesis, light harvesting;P:photosynthesis, light harvesting in photosystem I;P:protein-chromophore linkage;P:response to light stimulus	AT3G08940_LHCB4.2;AT5G01530_LHCB4.1
A0A287QGL6					0	0	0	0	0	0	0	0	0	0	0	0	0	-1	-1	0	0	0	0	0	2	0	1	1	2	0	2	HORVU5Hr1G016680	HORVU.MOREX.r3.5HG0436900		NA	A0A287QGL6;F2CQM6	IPR000727|Target SNARE coiled-coil homology domain	C:endomembrane system;C:integral component of membrane;C:membrane;C:SNARE complex;F:SNAP receptor activity;F:SNARE binding;P:intracellular protein transport;P:vesicle docking;P:vesicle fusion	AT1G16225_;AT1G16230_;AT1G16240_SYP51;AT1G79590_SYP52	0	0	0	0	0	0	0	0	0	0
A0A287QHH5					0	0	0	1	0	0	0	0	0	0	0	0	0	0	0	0	0	0	1	0	0	1	0	0	0	1	1	HORVU5Hr1G017680	HORVU.MOREX.r3.5HG0438100	Predicted protein	NA	A0A287QHH5;A0A287QI48;F2DW24	IPR003323|OTU domain;IPR038765|Papain-like cysteine peptidase superfamily	C:cytosol;F:thiol-dependent ubiquitin-specific protease activity;P:proteolysis	AT3G62940_	0	0	0	0	0	0	0	0	0	0
F2D884	cell organization and biogenesis		nucleotide binding	Pf00012, Pf06723	0	0	0	0	1	0	0	0	0	-1	0	0	1	0	0	0	0	0	1	1	1	2	1	0	1	2	3	HORVU5Hr1G021300	HORVU.MOREX.r3.5HG0441850	Predicted protein	NA	A0A287QL72;A0A287QL74;A0A287QL79;A0A287QLL1;A0A287QLL8;A0A287QLT0;A0A287QLU0;F2D884;M0Z8C6;O48606	IPR013126|Heat shock protein 70 family;IPR018181|Heat shock protein 70, conserved site;IPR029047|Heat shock protein 70kD, peptide-binding domain superfamily;IPR029048|Heat shock protein 70kD, C-terminal domain superfamily;|	C:cytoplasm;F:ATP binding;F:ATPase activity;F:ATPase activity, coupled;F:heat shock protein binding;F:misfolded protein binding;F:nucleotide binding;F:protein folding chaperone;F:unfolded protein binding;P:cellular response to unfolded protein;P:chaperone cofactor-dependent protein refolding;P:protein refolding;P:response to unfolded protein	AT1G56410_HSP70-18;AT3G09440_HSP70-3;AT5G02490_MED37D;AT5G02500_MED37E	0	0	0	0	0	0	0	0	0	0
A0A287QMC7					0	0	0	0	0	0	1	0	1	0	0	0	-1	0	0	0	0	0	0	2	1	2	0	1	3	0	3	HORVU5Hr1G022070	HORVU.MOREX.r3.5HG0442680		NA	A0A287QLS0;A0A287QLS2;A0A287QM64;A0A287QM65;A0A287QM69;A0A287QM70;A0A287QMC7	IPR009738|BAT2, N-terminal;IPR038808|Protein modifier of SNC1 1-like	P:regulation of gene expression, epigenetic		0	0	0	0	0	0	0	0	0	0
A0A287QPI2					0	0	0	1	0	1	0	0	0	1	1	1	0	0	0	0	0	0	2	3	0	2	1	2	0	5	5	HORVU5Hr1G024350	HORVU.MOREX.r3.5HG0444800		NA	A0A287QP21;A0A287QP26;A0A287QPF3;A0A287QPH7;A0A287QPI2	IPR036869|Chaperone J-domain superfamily;|	C:cytoplasm;C:intracellular membrane-bounded organelle;C:vesicle;F:clathrin binding;P:clathrin coat disassembly;P:clathrin-dependent endocytosis;P:receptor-mediated endocytosis	AT1G21660_;AT4G12770_;AT4G12780_AUXI1	0	0	0	0	0	0	0	0	0	0
A0A287QQN0					0	0	0	0	0	-1	0	0	0	0	0	0	0	0	0	0	0	-1	1	0	1	0	0	2	0	2	2	HORVU5Hr1G025950	HORVU.MOREX.r3.5HG0446370		NA	A0A287QQ30;A0A287QQK1;A0A287QQN0;A0A287QQN6;M0VTW8;M0VTX0	|		AT4G03150_	0	0	0	0	0	0	0	0	0	0
A0A287QRK0					0	0	0	1	0	1	0	0	0	0	0	0	-1	0	0	0	0	0	2	0	1	2	0	1	1	2	3	HORVU5Hr1G028360	HORVU.MOREX.r3.5HG0448610		NA	A0A287QRK0;A0A287QRN9;A0A287QRY6;A0A287QS35;A0A287QS39;A0A287QS49	IPR001884|Translation elongation factor IF5A-like;IPR008991|Translation protein SH3-like domain superfamily;IPR012340|Nucleic acid-binding, OB-fold;IPR014722|Ribosomal protein L2, domain 2;IPR019769|Translation elongation factor, IF5A, hypusine site;IPR020189|Translation elongation factor, IF5A C-terminal	F:ribosome binding;F:RNA binding;F:translation elongation factor activity;P:positive regulation of translational elongation;P:positive regulation of translational termination;P:translation;P:translational elongation;P:translational frameshifting	AT1G13950_ELF5A-1;AT1G26630_ELF5A-2;AT1G69410_ELF5A-3	0	0	0	0	0	0	0	0	0	0
F2D5G5	cell organization and biogenesis;metabolic process		nucleotide binding;protein binding	Pf00012, Pf06723	1	1	1	0	0	0	0	0	0	0	0	0	0	0	0	0	0	0	3	0	0	1	1	1	3	0	3	HORVU5Hr1G032650	HORVU.MOREX.r3.5HG0451540	Predicted protein	NA	A0A287QT42;A0A287QT67;A0A287QTF5;A0A287QTG0;A0A287QTL7;A0A287QTM3;F2D5G5	IPR012725|Chaperone DnaK;IPR013126|Heat shock protein 70 family;IPR018181|Heat shock protein 70, conserved site;IPR029047|Heat shock protein 70kD, peptide-binding domain superfamily;IPR029048|Heat shock protein 70kD, C-terminal domain superfamily	C:chloroplast;C:cytoplasm;F:ATP binding;F:ATPase activity;F:ATPase activity, coupled;F:heat shock protein binding;F:misfolded protein binding;F:nucleotide binding;F:protein folding chaperone;F:unfolded protein binding;P:cellular response to unfolded protein;P:chaperone cofactor-dependent protein refolding;P:protein folding;P:protein refolding;P:response to unfolded protein	AT4G24280_HSP70-6;AT5G49910_HSP70-7	0	0	0	0	0	0	0	0	0	0
A0A287QT87					0	0	0	0	0	0	0	0	0	0	0	0	1	0	0	0	0	-1	0	0	2	1	0	1	1	1	2	HORVU5Hr1G032980	HORVU.MOREX.r3.5HG0451840	Fructose-bisphosphate aldolase	NA	A0A287QT87;A0A287QT92;A0A287QTI6;A0A287QTP7;F2D6R8;M0XCY8	IPR000741|Fructose-bisphosphate aldolase, class-I;IPR013785|Aldolase-type TIM barrel;IPR029768|Fructose-bisphosphate aldolase class-I active site	C:cytosol;F:catalytic activity;F:fructose-bisphosphate aldolase activity;F:lyase activity;P:fructose 1,6-bisphosphate metabolic process;P:glycolytic process	AT2G21330_FBA1;AT4G38970_FBA2	0	0	0	-1	0	-1	0	0	0	0
A0A287QUE3					0	0	0	0	0	1	0	0	0	0	0	0	0	0	0	0	0	0	1	0	0	0	0	1	0	1	1	HORVU5Hr1G034770			NA	A0A287QUE3;A0A287QUI2	IPR001351|Ribosomal protein S3, C-terminal;IPR004044|K Homology domain, type 2;IPR005703|Ribosomal protein S3, eukaryotic/archaeal;IPR009019|K homology domain superfamily, prokaryotic type;IPR015946|K homology domain-like, alpha/beta;IPR018280|Ribosomal protein S3, conserved site;IPR036419|Ribosomal protein S3, C-terminal domain superfamily	C:cytosolic small ribosomal subunit;C:nucleus;C:ribosome;C:small ribosomal subunit;F:damaged DNA binding;F:DNA-(apurinic or apyrimidinic site) endonuclease activity;F:RNA binding;F:structural constituent of ribosome;P:DNA repair;P:translation	AT2G31610_RPS3A;AT3G53870_RPS3B;AT5G35530_RPS3C	0	0	0	0	0	0	0	0	0	0
A0A287QVX5					0	0	0	1	0	0	0	0	0	0	0	0	0	0	0	0	0	0	1	0	0	1	0	0	0	1	1	HORVU5Hr1G037160	HORVU.MOREX.r3.5HG0455580		NA	A0A287QVG8;A0A287QVH5;A0A287QVH9;A0A287QVI0;A0A287QVI4;A0A287QVQ3;A0A287QVQ8;A0A287QVR3;A0A287QVS6;A0A287QVT1;A0A287QVT5;A0A287QVX5;A0A287QVX7;A0A287QVY2	IPR002016|Haem peroxidase;IPR002207|Class I peroxidase;IPR010255|Haem peroxidase superfamily;IPR019793|Peroxidases heam-ligand binding site	F:heme binding;F:peroxidase activity;P:cellular oxidant detoxification;P:cellular response to oxidative stress;P:hydrogen peroxide catabolic process;P:oxidation-reduction process;P:response to oxidative stress;P:response to reactive oxygen species	AT1G77490_APXT;AT4G08390_APXS	0	0	0	0	0	0	0	0	0	0
A0A287QVU9					1	1	0	0	1	0	0	0	0	0	0	0	1	1	0	0	-1	0	3	0	3	2	4	0	4	2	6	HORVU5Hr1G038090	HORVU.MOREX.r3.5HG0456510	Dihydrolipoamide acetyltransferase component of pyruvate dehydrogenase complex	NA	A0A287QVU9;A0A287QW37;A0A287QWA1	IPR000089|Biotin/lipoyl attachment;IPR001078|2-oxoacid dehydrogenase acyltransferase, catalytic domain;IPR003016|2-oxo acid dehydrogenase, lipoyl-binding site;IPR004167|Peripheral subunit-binding domain;IPR011053|Single hybrid motif;IPR023213|Chloramphenicol acetyltransferase-like domain superfamily;IPR036625|E3-binding domain superfamily	F:transferase activity;F:transferase activity, transferring acyl groups		0	0	0	0	0	0	0	0	0	0
M0XW49	metabolic process	ribosome	RNA binding;structural molecule activity	Pf00163, Pf01479	0	0	0	0	0	0	0	0	0	0	0	0	1	0	0	0	0	0	0	0	1	1	0	0	1	0	1	HORVU5Hr1G038920			NA	A0A287QW16;A0A287QWA8;A0A287QWB8;A0A287QWH1;M0XW49	IPR001912|Ribosomal protein S4/S9, N-terminal;IPR002942|RNA-binding S4 domain;IPR005710|Ribosomal protein S4/S9, eukaryotic/archaeal;IPR018079|Ribosomal protein S4, conserved site;IPR022801|Ribosomal protein S4/S9;IPR036986|RNA-binding S4 domain superfamily	C:cytosolic small ribosomal subunit;C:intracellular;C:ribosome;C:small ribosomal subunit;F:RNA binding;F:rRNA binding;F:structural constituent of ribosome;P:positive regulation of translational fidelity;P:translation	AT5G15200_RPS9B;AT5G39850_RPS9C	0	0	0	0	0	0	0	0	0	0
A0A287R0T2					0	0	1	0	0	0	0	0	0	0	0	0	0	0	-1	0	0	-1	1	0	2	0	0	3	2	1	3	HORVU5Hr1G045440	HORVU.MOREX.r3.5HG0463230		NA	A0A287R0T2;A0A287R0T3;A0A287R122;A0A287R182;A0A287R186;F2E0U3	IPR005225|Small GTP-binding protein domain;IPR006689|Small GTPase superfamily, ARF/SAR type;IPR027417|P-loop containing nucleoside triphosphate hydrolase	C:cytoplasm;C:integral component of membrane;C:intracellular;C:membrane;F:GTP binding;F:nucleotide binding;P:intracellular protein transport;P:vesicle-mediated transport		0	0	0	0	0	0	0	0	0	0
A0A287R194					0	0	0	0	0	0	0	0	0	0	1	0	0	0	0	0	0	0	0	1	0	0	1	0	0	1	1	HORVU5Hr1G045800	HORVU.MOREX.r3.5HG0463600		NA	A0A287R134;A0A287R138;A0A287R143;A0A287R194;A0A287R1D1;A0A287R1D6;A0A287R1K1	IPR000922|D-galactoside/L-rhamnose binding SUEL lectin domain;IPR001944|Glycoside hydrolase, family 35;IPR008979|Galactose-binding-like domain superfamily;|	C:cell wall;C:vacuole;F:beta-galactosidase activity;F:carbohydrate binding;F:hydrolase activity, hydrolyzing O-glycosyl compounds;P:carbohydrate metabolic process	AT2G32810_BGAL9	0	0	0	0	0	0	0	0	0	0
Q42848	transport			Pf00234	0	0	0	1	0	0	0	0	0	0	0	1	0	0	0	0	0	1	1	1	1	1	0	2	0	3	3	HORVU5Hr1G046520	HORVU.MOREX.r3.5HG0464400	Non-specific lipid-transfer protein	Q43766	M0VYA0;Q42848	IPR000528|Plant lipid transfer protein/Par allergen;IPR016140|Bifunctional inhibitor/plant lipid transfer protein/seed storage helical domain;IPR036312|Bifunctional inhibitor/plant lipid transfer protein/seed storage helical domain superfamily	C:membrane;F:lipid binding;P:lipid transport		0	0	0	0	0	0	0	0	0	0
A0A287R5R0					0	0	0	0	0	0	0	0	0	1	1	1	0	0	1	1	0	1	0	3	3	2	1	3	1	5	6	HORVU5Hr1G050120	HORVU.MOREX.r3.5HG0467780		NA	A0A287R5Q5;A0A287R5R0	|			0	0	0	0	0	0	0	0	0	0
A0A287R5R0					0	0	0	0	0	0	0	0	0	1	1	1	0	0	1	1	0	1	0	3	3	2	1	3	1	5	6	HORVU5Hr1G050140	HORVU.MOREX.r3.5HG0467780		NA	A0A287R5R0;M0VP27	|			0	0	0	0	0	0	0	0	0	0
A0A287R671					0	0	0	0	0	0	0	0	0	0	0	0	0	0	0	0	0	1	0	0	1	0	0	1	0	1	1	HORVU5Hr1G050820	HORVU.MOREX.r3.5HG0468460		NA	A0A287R664;A0A287R671;A0A287R678;A0A287R683;A0A287R692;A0A287R696;A0A287R6A6;A0A287R6G6;A0A287R6H1;A0A287R6H9;A0A287R6I1;A0A287R6I4;A0A287R6I9;A0A287R6P6;A0A287R6Q0;A0A287R6Q5;A0A287R6R0;B6E012;M0X5X4	IPR000504|RNA recognition motif domain;IPR001202|WW domain;IPR012677|Nucleotide-binding alpha-beta plait domain superfamily;IPR035979|RNA-binding domain superfamily;IPR036020|WW domain superfamily	C:nucleus;C:ribonucleoprotein complex;C:spliceosomal complex;F:nucleic acid binding;F:protein binding;F:RNA binding;P:positive regulation of mRNA splicing, via spliceosome;P:regulation of cell size;P:regulation of flower development;P:regulation of RNA metabolic process;P:regulation of seed growth;P:regulation of timing of transition from vegetative to reproductive phase	AT2G47310_;AT4G16280_FCA	0	0	0	0	0	0	0	0	0	0
F2D030	regulation of biological process	mitochondrion	enzyme regulator activity	Pf01722, Pf02657	0	0	1	0	0	0	0	0	0	0	0	0	0	0	0	0	0	1	1	0	1	0	0	2	1	1	2	HORVU5Hr1G052770	HORVU.MOREX.r3.5HG0470670	Predicted protein	NA	F2D030	IPR002634|BolA protein;IPR003808|Fe-S metabolism associated domain, SufE-like;IPR036065|BolA-like superfamily		AT1G55805_BOLA1;AT4G26500_SUFE1	0	0	0	0	0	0	0	0	0	0
M0XJ70				Pf00179	0	0	0	0	0	0	0	0	0	0	0	0	0	0	0	0	0	-1	0	0	1	0	0	1	0	1	1	HORVU5Hr1G054080	HORVU.MOREX.r3.5HG0471700		NA	A0A287R9M6;M0XJ70	IPR000608|Ubiquitin-conjugating enzyme E2;IPR016135|Ubiquitin-conjugating enzyme/RWD-like	C:nucleus;F:ubiquitin conjugating enzyme activity;P:postreplication repair;P:protein K63-linked ubiquitination	AT2G36060_MMZ3;AT3G52560_UEV1D-4	0	0	0	0	0	0	0	0	0	0
O48518	transport	membrane	transporter activity	Pf00230	0	0	0	0	0	0	0	0	0	0	0	0	1	1	1	0	0	0	0	0	3	1	1	1	3	0	3	HORVU5Hr1G055200	HORVU.MOREX.r3.5HG0472810		NA	A0A287R9Z4;A0A287RA42;A0A287RA46;A0A287RA78;A0A287RAB2;A0A287RAD4;A0A287RAD9;F2DW30;O48518;Q08IH4;Q08IH5	IPR000425|Major intrinsic protein;IPR022357|Major intrinsic protein, conserved site;IPR023271|Aquaporin-like;IPR034294|Aquaporin transporter	C:integral component of membrane;C:membrane;C:plasma membrane;C:plasmodesma;C:vacuole;F:channel activity;F:water channel activity;P:response to water deprivation;P:transmembrane transport;P:water transport	AT1G01620_PIP1-3;AT2G45960_PIP1B;AT3G61430_PIP1-1;AT4G00430_PIP1.4;AT4G23400_PIP1-5	0	0	0	0	0	0	0	0	0	0
A0A287RFP2					0	0	0	0	0	1	0	0	0	0	0	0	0	0	0	-1	0	0	1	0	1	1	0	1	0	2	2	HORVU5Hr1G061140	HORVU.MOREX.r3.5HG0479640	Dihydrolipoamide acetyltransferase component of pyruvate dehydrogenase complex	NA	A0A287RFP2;A0A287RG32;F2CR51	IPR000089|Biotin/lipoyl attachment;IPR001078|2-oxoacid dehydrogenase acyltransferase, catalytic domain;IPR003016|2-oxo acid dehydrogenase, lipoyl-binding site;IPR004167|Peripheral subunit-binding domain;IPR011053|Single hybrid motif;IPR023213|Chloramphenicol acetyltransferase-like domain superfamily;IPR036625|E3-binding domain superfamily	F:transferase activity;F:transferase activity, transferring acyl groups	AT3G25860_LTA2	0	0	0	0	0	0	0	0	0	0
A0A287RG57					0	0	0	1	1	1	0	0	0	0	0	0	0	0	0	0	0	0	3	0	0	1	1	1	0	3	3	HORVU5Hr1G061170	HORVU.MOREX.r3.5HG0479680		NA	A0A287RFM4;A0A287RG57	IPR002068|Alpha crystallin/Hsp20 domain;IPR008978|HSP20-like chaperone			0	0	0	0	0	0	0	0	0	0
A0A287RJI1					0	0	0	0	-1	0	0	0	0	0	0	0	1	0	0	0	0	0	1	0	1	1	1	0	1	1	2	HORVU5Hr1G064660			NA	A0A287RJI1	IPR001912|Ribosomal protein S4/S9, N-terminal;IPR002942|RNA-binding S4 domain;IPR005709|Ribosomal protein S4, bacterial-type;IPR018079|Ribosomal protein S4, conserved site;IPR022801|Ribosomal protein S4/S9;IPR036986|RNA-binding S4 domain superfamily	C:intracellular;C:ribosome;C:small ribosomal subunit;F:RNA binding;F:rRNA binding;F:structural constituent of ribosome;P:positive regulation of translational fidelity;P:translation	ATCG00380_RPS4	0	0	0	0	0	-1	0	0	0	0
A0A287RJR5					-1	-1	-1	0	0	0	0	0	0	1	1	1	1	1	1	0	0	0	3	3	3	3	3	3	6	3	9	HORVU5Hr1G065220	HORVU.MOREX.r3.5HG0483830		NA	A0A287RJK8;A0A287RJR5;A0A287RJT4;A0A287RK17	IPR001478|PDZ domain;IPR035269|26S Proteasome non-ATPase regulatory subunit 9;IPR036034|PDZ superfamily;IPR040815|Nas2, N-terminal	C:cytoplasm;C:nucleus;F:protein binding;P:proteasome regulatory particle assembly	AT5G57950_	0	0	0	0	0	0	0	0	0	0
M0YH64	metabolic process			Pf02298	1	1	1	0	0	0	0	0	0	0	0	0	0	0	0	0	0	0	3	0	0	1	1	1	3	0	3	HORVU5Hr1G070040	HORVU.MOREX.r3.5HG0488040		NA	A0A287RPD3;M0YH64	IPR003245|Phytocyanin domain;IPR008972|Cupredoxin;IPR028871|Blue (type 1) copper protein, binding site;IPR039391|Phytocyanin	C:anchored component of plasma membrane;F:electron transfer activity;P:electron transport chain		0	0	0	0	0	0	0	0	0	0
Q00327	metabolic process;regulation of biological process	membrane		Pf01241	1	1	1	0	0	0	0	0	0	0	0	0	0	0	0	0	0	0	3	0	0	1	1	1	3	0	3	HORVU5Hr1G071920		Predicted protein	Q00327	F2DE22	IPR000549|Photosystem I PsaG/PsaK protein;IPR016370|Photosystem I PsaG/PsaK, plant;IPR017494|Photosystem I PsaG, plant;IPR023618|Photosystem I PsaG/PsaK domain, chloroplastic	C:chloroplast;C:chloroplast thylakoid membrane;C:integral component of membrane;C:membrane;C:photosystem I;C:plastid;C:thylakoid;P:photosynthesis		0	0	0	-1	0	-1	0	0	0	0
A0A287RSZ8					0	0	0	0	0	0	0	0	0	0	0	0	0	0	0	0	-1	0	0	0	1	0	1	0	0	1	1	HORVU5Hr1G073990	HORVU.MOREX.r3.5HG0491380		NA	A0A287RSQ4;A0A287RSX4;A0A287RSZ3;A0A287RSZ8;A0A287RT23;A0A287RT35	|	C:integral component of membrane;C:membrane	AT1G20970_	0	0	0	0	0	0	0	0	0	0
A0A287RZ89					0	0	0	1	0	0	0	0	0	1	0	1	0	0	0	0	0	1	1	2	1	2	0	2	0	4	4	HORVU5Hr1G080610	HORVU.MOREX.r3.5HG0497830		NA	A0A287RZ89;A0A287RZA1;M0Y9J4;M0Y9J5	IPR001012|UBX domain;IPR009060|UBA-like superfamily;IPR029071|Ubiquitin-like domain superfamily	F:protein binding	AT4G00752_PUX9;AT4G11740_PUX8;AT4G23040_PUX13	0	0	0	0	0	0	0	0	0	0
A0A287RZT3					1	1	0	0	0	0	0	0	0	1	1	1	1	1	1	1	1	1	2	3	6	4	4	3	5	6	11	HORVU5Hr1G081070	HORVU.MOREX.r3.5HG0498300		NA	A0A287RZH4;A0A287RZI3;A0A287RZI8;A0A287RZJ3;A0A287RZJ9;A0A287RZN8;A0A287RZP7;A0A287RZP9;A0A287RZQ2;A0A287RZQ4;A0A287RZQ5;A0A287RZQ8;A0A287RZQ9;A0A287RZR2;A0A287RZR6;A0A287RZS0;A0A287RZS1;A0A287RZS2;A0A287RZS5;A0A287RZS6;A0A287RZT1;A0A287RZT3;A0A287RZT5;A0A287RZT6;A0A287RZX6;A0A287RZY4;A0A287RZY8;A0A287RZZ6;A0A287S001;M0WM85;M0WM88;M0WM91;M0WM93;M0WM94	IPR001752|Kinesin motor domain;IPR021881|NPK1-activating kinesin-like protein, C-terminal;IPR027417|P-loop containing nucleoside triphosphate hydrolase;IPR027640|Kinesin-like protein;IPR036961|Kinesin motor domain superfamily;|	C:integral component of membrane;C:kinesin complex;C:membrane;C:microtubule;F:ATP binding;F:ATPase activity;F:microtubule binding;F:microtubule motor activity;F:motor activity;F:nucleotide binding;P:microtubule-based movement	AT2G21300_KIN7E;AT3G51150_KIN7G;AT4G24170_KIN7I;AT4G38950_KIN7F;AT5G42490_;AT5G66310_KIN7H	0	0	0	0	0	0	0	0	0	0
A0A287S128					0	0	0	0	0	0	0	0	0	-1	0	0	0	0	0	0	0	0	0	1	0	1	0	0	0	1	1	HORVU5Hr1G082420		Chlorophyll a-b binding protein, chloroplastic	NA	A0A287S128;F2CWY5	IPR001344|Chlorophyll A-B binding protein, plant;IPR022796|Chlorophyll A-B binding protein;IPR023329|Chlorophyll a/b binding domain superfamily	C:chloroplast;C:chloroplast envelope;C:chloroplast thylakoid membrane;C:integral component of membrane;C:membrane;C:photosystem I;C:photosystem II;C:plastid;C:plastoglobule;C:thylakoid;F:chlorophyll binding;P:photosynthesis;P:photosynthesis, light harvesting;P:photosynthesis, light harvesting in photosystem I;P:protein-chromophore linkage;P:response to light stimulus	AT2G05070_LHCB2.2;AT2G05100_LHCB2.1;AT3G27690_LHCB2.4	0	0	0	-1	0	-1	0	0	-1	0
F2DMS9	transport	membrane	transporter activity	Pf00230	0	0	1	0	1	0	0	0	0	0	0	0	1	0	0	0	0	0	2	0	1	1	1	1	2	1	3	HORVU5Hr1G084230	HORVU.MOREX.r3.5HG0500800		NA	A0A287S2B4;A0A287S2J9;F2D7Y4;F2DMS9;F6JVF1	IPR000425|Major intrinsic protein;IPR022357|Major intrinsic protein, conserved site;IPR023271|Aquaporin-like;IPR034294|Aquaporin transporter	C:integral component of membrane;C:membrane;C:plasma membrane;C:plasmodesma;C:vacuole;F:channel activity;F:water channel activity;P:transmembrane transport;P:water transport		0	0	0	-1	0	-1	0	0	-1	0
F2E6D7					0	0	0	0	0	0	0	0	0	0	0	0	0	0	0	1	1	1	0	0	3	1	1	1	0	3	3	HORVU5Hr1G084440	HORVU.MOREX.r3.5HG0501080	Predicted protein	NA	A0A287S2C2;A0A287S2G9;F2E6D7;M0ZA44	|		AT5G66090_	0	0	0	0	0	0	0	0	0	0
A0A287S2W4					0	-1	0	0	0	0	0	0	0	0	0	0	0	0	1	0	0	0	1	0	1	0	1	1	2	0	2	HORVU5Hr1G084900	HORVU.MOREX.r3.4HG0409080		NA	A0A287S2R4;A0A287S2R8;A0A287S2S8;A0A287S2V2;A0A287S2W0;A0A287S2W4;A0A287S315;A0A287S324;F2D9H1	IPR000490|Glycoside hydrolase family 17;IPR012946|X8 domain;IPR017853|Glycoside hydrolase superfamily;|	C:anchored component of plasma membrane;F:hydrolase activity;F:hydrolase activity, hydrolyzing O-glycosyl compounds;P:carbohydrate metabolic process	AT2G05790_;AT4G26830_;AT5G55180_	0	0	0	0	0	0	0	0	0	0
F2DFW6		Golgi	protein binding	Pf00564, Pf12895, Pf13414, Pf15015	0	0	-1	0	0	0	0	0	0	0	0	0	0	0	0	0	-1	-1	1	0	2	0	1	2	1	2	3	HORVU5Hr1G088290	HORVU.MOREX.r3.5HG0504720	Predicted protein	NA	F2DFW6	IPR000270|PB1 domain;IPR011990|Tetratricopeptide-like helical domain superfamily;IPR013026|Tetratricopeptide repeat-containing domain;IPR019734|Tetratricopeptide repeat	F:protein binding	AT2G25290_Phox1;AT4G32070_Phox4;AT5G20360_Phox3	0	0	0	0	0	0	0	0	0	0
A0A287S8C1					0	0	0	1	0	1	0	0	0	1	0	0	0	0	0	0	0	0	2	1	0	2	0	1	0	3	3	HORVU5Hr1G092100	HORVU.MOREX.r3.5HG0507390		NA	A0A287S8C1;A0A287S8E1	IPR000167|Dehydrin;IPR030513|Dehydrin, conserved site	C:cytosol;P:cold acclimation;P:response to abscisic acid;P:response to water;P:response to water deprivation		0	0	0	0	0	0	0	0	0	1
A0A287S8C1					0	0	0	1	0	1	0	0	0	1	0	0	0	0	0	0	0	0	2	1	0	2	0	1	0	3	3	HORVU5Hr1G092150	HORVU.MOREX.r3.5HG0507390		P12952	A0A287S8C1;A0A287S8E1;Q9SBI9;Q9SPB0	IPR000167|Dehydrin;IPR030513|Dehydrin, conserved site	C:cytosol;P:cold acclimation;P:response to abscisic acid;P:response to water;P:response to water deprivation		0	0	0	0	0	0	0	0	0	0
A0A287S8E6					0	0	0	0	1	0	0	0	0	0	0	0	0	0	1	0	0	0	1	0	1	0	1	1	1	1	2	HORVU5Hr1G092170	HORVU.MOREX.r3.5HG0507450		NA	A0A287S8D0;A0A287S8D3;A0A287S8E6;A0A287S8I5;A0A287S8M6	IPR011990|Tetratricopeptide-like helical domain superfamily;|	C:chloroplast thylakoid membrane;C:integral component of membrane;C:membrane;F:protein binding		0	0	0	0	0	0	0	0	0	0
F2D074				Pf12481, Pf13522, Pf13537	0	0	1	0	0	0	0	1	1	0	0	0	0	1	0	0	0	0	1	2	1	0	2	2	4	0	4	HORVU5Hr1G094370	HORVU.MOREX.r3.5HG0509900	Predicted protein	NA	A0A287SBD0;F2D074	IPR024286|Domain of unknown function DUF3700;IPR029055|Nucleophile aminohydrolases, N-terminal		AT3G22850_;AT5G43830_	0	0	0	0	0	0	0	0	0	0
A0A287SC65					0	1	0	0	0	0	0	0	0	0	0	0	0	0	0	0	0	0	1	0	0	0	1	0	1	0	1	HORVU5Hr1G094950	HORVU.MOREX.r3.5HG0510340		NA	A0A287SC64;A0A287SC65;A0A287SC69;A0A287SC70;A0A287SCC4;A0A287SCD0	IPR007275|YTH domain;|	F:RNA binding	AT1G55500_ECT4;AT3G03950_ECT1;AT3G13460_ECT2;AT5G61020_ECT3	0	0	0	0	0	0	0	0	0	0
A0A287SFI2					0	0	-1	0	0	0	0	0	0	0	0	0	-1	0	0	0	0	-1	1	0	2	1	0	2	2	1	3	HORVU5Hr1G097590	HORVU.MOREX.r3.5HG0512760		NA	A0A287SFI2;A0A287SFI5;A0A287SFK8;A0A287SFL3;A0A287SFM7;A0A287SFN2;A0A287SFN9	IPR003121|SWIB/MDM2 domain;IPR014876|DEK, C-terminal;IPR019835|SWIB domain;IPR036885|SWIB/MDM2 domain superfamily	F:protein binding	AT1G49520_;AT3G19080_	0	0	0	0	0	0	0	0	0	0
A0A287SFZ8					0	0	0	1	1	1	0	0	0	0	0	0	0	0	0	1	1	0	3	0	2	2	2	1	0	5	5	HORVU5Hr1G098000	HORVU.MOREX.r3.5HG0513130		NA	A0A287SFZ7;A0A287SFZ8;A0A287SG19;A0A287SG43;M0Z194	IPR013766|Thioredoxin domain;IPR036249|Thioredoxin-like superfamily	C:cell;C:chloroplast;C:chloroplast thylakoid;C:chloroplast thylakoid membrane;C:thylakoid lumen;F:oxidoreductase activity, acting on a sulfur group of donors, disulfide as acceptor;F:protein disulfide oxidoreductase activity;P:cell redox homeostasis;P:cytochrome b6f complex assembly;P:glycerol ether metabolic process;P:oxidation-reduction process	AT4G37200_HCF164	0	0	0	0	0	0	0	0	0	0
A0A287SGQ2					0	0	1	0	0	0	0	0	0	0	0	0	1	1	0	0	0	0	1	0	2	1	1	1	3	0	3	HORVU5Hr1G098890	HORVU.MOREX.r3.5HG0513810	Malate dehydrogenase	NA	A0A287SGM1;A0A287SGM5;A0A287SGM6;A0A287SGN0;A0A287SGN1;A0A287SGN5;A0A287SGQ2;A0A287SGS1;A0A287SGS6;A0A287SGU2;F2DKX5;M0XY55	IPR001236|Lactate/malate dehydrogenase, N-terminal;IPR001252|Malate dehydrogenase, active site;IPR001557|L-lactate/malate dehydrogenase;IPR010097|Malate dehydrogenase, type 1;IPR015955|Lactate dehydrogenase/glycoside hydrolase, family 4, C-terminal;IPR022383|Lactate/malate dehydrogenase, C-terminal;IPR036291|NAD(P)-binding domain superfamily	C:chloroplast;C:cytoplasm;F:catalytic activity;F:L-malate dehydrogenase activity;F:malate dehydrogenase activity;F:oxidoreductase activity;F:oxidoreductase activity, acting on the CH-OH group of donors, NAD or NADP as acceptor;P:carbohydrate metabolic process;P:carboxylic acid metabolic process;P:malate metabolic process;P:oxidation-reduction process;P:tricarboxylic acid cycle	AT2G22780_PMDH1;AT5G09660_PMDH2	0	0	0	0	0	0	0	0	0	0
A0A287SH79					0	0	0	0	0	0	0	0	0	-1	0	-1	0	0	0	0	0	-1	0	2	1	1	0	2	0	3	3	HORVU5Hr1G099350	HORVU.MOREX.r3.5HG0514190		NA	A0A287SH41;A0A287SH48;A0A287SH51;A0A287SH69;A0A287SH74;A0A287SH79;A0A287SH80;A0A287SH84;A0A287SH88;A0A287SH90;A0A287SH92;A0A287SH94;A0A287SH96;A0A287SHA4;M0Y8U6;M0Y8U7	IPR000873|AMP-dependent synthetase/ligase;IPR020845|AMP-binding, conserved site;IPR025110|AMP-binding enzyme, C-terminal domain;IPR042099|AMP-dependent synthetase-like superfamily;|	C:endoplasmic reticulum;C:plasmodesma;F:catalytic activity;F:long-chain fatty acid-CoA ligase activity;F:very long-chain fatty acid-CoA ligase activity;P:cutin biosynthetic process;P:defense response to fungus;P:lateral root formation;P:long-chain fatty acid metabolic process	AT1G49430_LACS2	0	0	0	0	0	0	0	0	0	0
Q3MUP2			catalytic activity;protein binding	Pf02798, Pf13409, Pf13417	0	0	0	0	0	0	0	0	0	0	0	0	0	0	0	0	0	-1	0	0	1	0	0	1	0	1	1	HORVU5Hr1G103420	HORVU.MOREX.r3.5HG0516710		NA	A0A287SJ73;A8MPH5;Q3MUP2;Q9SES7	IPR004045|Glutathione S-transferase, N-terminal;IPR010987|Glutathione S-transferase, C-terminal-like;IPR036249|Thioredoxin-like superfamily;IPR036282|Glutathione S-transferase, C-terminal domain superfamily;IPR040079|Glutathione Transferase family	C:cytoplasm;F:glutathione transferase activity;F:protein binding;F:transferase activity;P:glutathione metabolic process	AT1G53680_GSTU28	1	0	0	1	0	1	1	0	1	0
A0A287SM95					0	0	0	0	0	0	0	0	0	0	0	0	0	0	0	-1	0	0	0	0	1	1	0	0	0	1	1	HORVU5Hr1G106380	HORVU.MOREX.r3.5HG0519720	Lysine--tRNA ligase	NA	A0A287SM00;A0A287SM05;A0A287SM41;A0A287SM43;A0A287SM69;A0A287SM77;A0A287SM82;A0A287SM95	IPR002313|Lysine-tRNA ligase, class II;IPR004364|Aminoacyl-tRNA synthetase, class II (D/K/N);IPR004365|OB-fold nucleic acid binding domain, AA-tRNA synthetase-type;IPR006195|Aminoacyl-tRNA synthetase, class II;IPR012340|Nucleic acid-binding, OB-fold;IPR018149|Lysyl-tRNA synthetase, class II, C-terminal;IPR034762|Bacterial/eukaryotic lysine-tRNA ligase, class II	C:cytoplasm;C:cytosol;C:plasmodesma;F:aminoacyl-tRNA ligase activity;F:ATP binding;F:lysine-tRNA ligase activity;F:nucleic acid binding;F:nucleotide binding;F:tRNA binding;P:lysyl-tRNA aminoacylation;P:tRNA aminoacylation for protein translation		0	0	0	0	0	0	0	0	0	0
A0A287SNX7					0	0	1	0	-1	0	0	0	0	-1	0	-1	1	0	0	0	0	0	2	2	1	2	1	2	2	3	5	HORVU5Hr1G109260		Chlorophyll a-b binding protein, chloroplastic	NA	A0A287SNX4;A0A287SNX7;M0ZEV7	IPR001344|Chlorophyll A-B binding protein, plant;IPR022796|Chlorophyll A-B binding protein;IPR023329|Chlorophyll a/b binding domain superfamily	C:chloroplast;C:chloroplast envelope;C:chloroplast thylakoid membrane;C:integral component of membrane;C:membrane;C:photosystem I;C:photosystem II;C:plastid;C:plastoglobule;C:thylakoid;F:chlorophyll binding;P:photosynthesis;P:photosynthesis, light harvesting;P:photosynthesis, light harvesting in photosystem I;P:protein-chromophore linkage;P:response to light stimulus	AT1G29910_LHCB1.1;AT1G29920_LHCB1.1;AT1G29930_LHCB1.3;AT2G34420_LHB1B2;AT2G34430_LHB1B1	0	0	0	-1	0	-1	0	0	-1	0
A0A287SP63					0	0	0	0	0	0	0	0	0	0	0	0	1	0	0	0	0	0	0	0	1	1	0	0	1	0	1	HORVU5Hr1G109440	HORVU.MOREX.r3.5HG0522290	Predicted protein	NA	A0A287SNX9;A0A287SNY4;A0A287SNZ1;A0A287SNZ5;A0A287SP42;A0A287SP51;A0A287SP55;A0A287SP60;A0A287SP63;A0A287SP67;F2CQ08	IPR004360|Glyoxalase/fosfomycin resistance/dioxygenase domain;IPR004361|Glyoxalase I;IPR018146|Glyoxalase I, conserved site;IPR029068|Glyoxalase/Bleomycin resistance protein/Dihydroxybiphenyl dioxygenase;IPR037523|Vicinal oxygen chelate (VOC) domain	C:cytoplasm;F:lactoylglutathione lyase activity;F:metal ion binding;P:methylglyoxal catabolic process to D-lactate via S-lactoyl-glutathione	AT1G67280_	0	0	0	-1	0	0	0	0	0	0
A0A287SR19					0	0	0	0	0	0	0	0	-1	0	0	0	0	-1	0	0	0	0	0	1	1	0	1	1	2	0	2	HORVU5Hr1G111820		40S ribosomal protein S26	NA	A0A287SQX8;A0A287SQY0;A0A287SR19;A0A287SR23;A0A287SR52;A0A287SR72;F2CV88	IPR000892|Ribosomal protein S26e;IPR038551|Ribosomal protein S26e superfamily;|	C:cytosolic small ribosomal subunit;C:integral component of membrane;C:intracellular;C:membrane;C:ribosome;F:mRNA binding;F:structural constituent of ribosome;P:translation	AT2G40510_RPS26B;AT2G40590_RPS26A;AT3G56340_RPS26C	0	0	0	0	0	0	0	0	0	0
P13194	metabolic process	membrane		Pf02427	1	0	0	0	0	0	0	0	0	0	0	0	0	0	0	0	0	0	1	0	0	1	0	0	1	0	1	HORVU5Hr1G113900			P13194	A0A287SSP8;A0A287SSS3;A0A287SSU5;A0A287SSX0;A0A287SSX8	IPR003375|Photosystem I PsaE, reaction centre subunit IV;IPR008990|Electron transport accessory-like domain superfamily;|	C:chloroplast;C:chloroplast thylakoid membrane;C:membrane;C:photosystem I;C:photosystem I reaction center;C:plastid;C:thylakoid;P:photosynthesis	AT2G20260_PSAE2;AT4G28750_PSAE1	0	0	0	0	0	-1	0	0	0	0
M0YA87				Pf11493	0	0	0	-1	0	0	0	0	0	0	0	0	0	0	0	0	0	0	1	0	0	1	0	0	0	1	1	HORVU5Hr1G115000	HORVU.MOREX.r3.5HG0527780		NA	M0YA87	IPR021584|Thylakoid soluble phosphoprotein TSP9;IPR037244|Thylakoid soluble phosphoprotein TSP9 superfamily	C:chloroplast		0	0	0	0	0	0	0	0	0	0
A0A287SV31					0	0	0	0	0	0	0	0	0	0	0	0	1	0	0	1	0	0	0	0	2	2	0	0	1	1	2	HORVU5Hr1G116580	HORVU.MOREX.r3.5HG0529120		NA	A0A287SV02;A0A287SV07;A0A287SV25;A0A287SV31;A0A287SV36;A0A287SV37;A0A287SV42;A0A287SV53;A0A287SV54;A0A287SV58;A0A287SV59;A0A287SV62	IPR000640|Elongation factor EFG, domain V-like;IPR000795|Transcription factor, GTP-binding domain;IPR004161|Translation elongation factor EFTu-like, domain 2;IPR005225|Small GTP-binding protein domain;IPR005517|Translation elongation factor EFG/EF2, domain IV;IPR009000|Translation protein, beta-barrel domain superfamily;IPR014721|Ribosomal protein S5 domain 2-type fold, subgroup;IPR020568|Ribosom…	C:cytosol;C:ribonucleoprotein complex;F:GTP binding;F:GTPase activity;F:ribosome binding;F:translation elongation factor activity;P:translational elongation	AT1G56070_LOS1;AT3G12915_	0	0	0	0	0	0	0	0	0	0
A0A287SZD3					0	0	0	0	0	0	0	0	0	0	0	0	1	0	1	0	0	0	0	0	2	1	0	1	2	0	2	HORVU5Hr1G121530	HORVU.MOREX.r3.5HG0533790		NA	A0A287SZB3;A0A287SZD3;A0A287SZE6;A0A287SZG7;F2CW07;M0WDR8;M0WDS0	IPR008700|RIN4, pathogenic type III effector avirulence factor Avr cleavage site;IPR040387|RPM1-interacting protein 4/NOI4	C:plasma membrane;P:defense response signaling pathway, resistance gene-independent		0	0	0	0	0	0	0	0	0	0
A0A287T108					0	0	0	0	0	0	0	0	0	0	0	0	0	0	0	0	0	1	0	0	1	0	0	1	0	1	1	HORVU5Hr1G123700	HORVU.MOREX.r3.5HG0536080		NA	A0A287T104;A0A287T108;A0A287T109;A0A287T110;A0A287T114;A0A287T115;A0A287T120;A0A287T121;A0A287T125;A0A287T126;A0A287T151;A0A287T156;A0A287T161;A0A287T188;A0A287T193;A0A287T198	IPR001841|Zinc finger, RING-type;IPR011016|Zinc finger, RING-CH-type;IPR013083|Zinc finger, RING/FYVE/PHD-type;IPR016024|Armadillo-type fold;IPR039795|E3 ubiquitin-protein ligase listerin;IPR039804|Listerin, zinc finger, RING-type	C:cytosol;C:RQC complex;F:metal ion binding;F:ribosomal large subunit binding;F:ubiquitin protein ligase activity;F:zinc ion binding;P:proteasome-mediated ubiquitin-dependent protein catabolic process;P:protein ubiquitination;P:rescue of stalled ribosome;P:ribosome-associated ubiquitin-dependent protein catabolic process	AT5G58410_	0	0	0	0	0	0	0	0	0	0
A0A287T1H4					0	0	0	0	0	1	0	0	0	0	0	0	0	0	0	0	0	0	1	0	0	0	0	1	0	1	1	HORVU5Hr1G124210			NA	A0A287T1C3;A0A287T1C5;A0A287T1D0;A0A287T1D5;A0A287T1D6;A0A287T1H1;A0A287T1H4;A0A287T1H9;A0A287T1J7;A0A287T1K2;M0Z798	IPR039987|PGR5-like protein 1	C:chloroplast thylakoid membrane;C:integral component of membrane;C:membrane;F:oxidoreductase activity, acting on iron-sulfur proteins as donors;P:photosynthetic electron transport in photosystem I	AT4G11960_PGRL1B;AT4G22890_PGRL1A	0	0	0	0	0	0	0	0	0	0
A0A287T3N5					0	0	0	1	0	0	0	0	0	0	0	0	0	0	0	0	0	0	1	0	0	1	0	0	0	1	1	HORVU5Hr1G125710	HORVU.MOREX.r3.5HG0537810		NA	A0A287T3D1;A0A287T3D4;A0A287T3D9;A0A287T3E1;A0A287T3F4;A0A287T3F6;A0A287T3K4;A0A287T3N5;A0A287T3N9	IPR000270|PB1 domain;IPR000719|Protein kinase domain;IPR001245|Serine-threonine/tyrosine-protein kinase, catalytic domain;IPR008271|Serine/threonine-protein kinase, active site;IPR011009|Protein kinase-like domain superfamily;IPR017441|Protein kinase, ATP binding site	C:cytoplasm;F:ATP binding;F:protein binding;F:protein kinase activity;P:protein phosphorylation	AT1G16270_;AT1G79570_;AT2G35050_	0	0	0	0	0	0	0	0	0	0
M0YPY5	metabolic process		catalytic activity	Pf00175, Pf00667, Pf00970	0	0	0	0	0	0	0	0	0	0	0	0	1	0	0	0	0	0	0	0	1	1	0	0	1	0	1	HORVU6Hr1G000620	HORVU.MOREX.r3.6HG0540590	Ferredoxin--NADP reductase, chloroplastic	NA	A0A287T420;A0A287T428;A0A287T437;A0A287T4B5;M0YPY5	IPR001433|Oxidoreductase FAD/NAD(P)-binding;IPR001709|Flavoprotein pyridine nucleotide cytochrome reductase;IPR008333|Flavoprotein pyridine nucleotide cytochrome reductase-like, FAD-binding domain;IPR015701|Ferredoxin--NADP reductase;IPR017927|FAD-binding domain, ferredoxin reductase-type;IPR017938|Riboflavin synthase-like beta-barrel;IPR035442|Ferredoxin--NADP reductase, plant and Cyanobacteria …	C:chloroplast;C:chloroplast thylakoid membrane protein complex;F:ferredoxin-NADP+ reductase activity;F:oxidoreductase activity;P:oxidation-reduction process	AT1G20020_LFNR2;AT5G66190_LFNR1	0	0	0	-1	0	-1	0	0	0	0
A0A287T476					0	1	0	0	0	-1	0	0	0	1	0	0	1	0	0	0	-1	1	2	1	3	2	2	2	2	4	6	HORVU6Hr1G000810			NA	A0A287T476;A0A287T482;A0A287T485;A0A287T487;A0A287T490;A0A287T495;A0A287T4A1;A0A287T4A5;A0A287T4H0;A0A287T4H5;A0A287T4I0;A0A287T4I1;A0A287T4I6;A0A287T4I9	IPR001010|Thionin;IPR036391|Thionin-like superfamily;|	C:integral component of membrane;C:membrane;P:defense response		0	0	-1	0	0	0	0	0	0	0
A0A287T700					0	0	0	0	0	0	0	0	0	0	0	-1	-1	0	0	-1	-1	-1	0	1	4	2	1	2	1	4	5	HORVU6Hr1G005020			NA	A0A287T700	|	C:integral component of membrane;C:membrane	AT3G45050_	0	0	0	0	0	0	0	0	0	0
A0A287T7V3					-1	0	0	0	0	0	0	0	0	-1	0	0	1	1	0	0	0	0	1	1	2	3	1	0	3	1	4	HORVU6Hr1G005960	HORVU.MOREX.r3.6HG0543740	Histone H2A	NA	A0A287T7V3;A0A287T7V7;A0A287T7V9;A0A287T7W0;A0A287T7W4;A0A287T7W6;A0A287T831;A0A287T840;A0A287T849;A0A287T853	IPR002119|Histone H2A;IPR007125|Histone H2A/H2B/H3;IPR009072|Histone-fold;IPR032454|Histone H2A, C-terminal domain;IPR032458|Histone H2A conserved site	C:chromosome;C:nuclear chromatin;C:nucleosome;C:nucleus;F:DNA binding;F:protein heterodimerization activity;P:chromatin organization;P:chromatin silencing	AT5G27670_HTA7;AT5G59870_HTA6	0	0	0	0	0	0	0	0	0	0
A0A287T8M5					0	0	1	0	0	0	0	0	0	0	0	0	1	1	0	0	0	0	1	0	2	1	1	1	3	0	3	HORVU6Hr1G007470	HORVU.MOREX.r3.6HG0544880		NA	A0A287T8D2;A0A287T8M5	IPR000164|Histone H3/CENP-A;IPR007125|Histone H2A/H2B/H3;IPR009072|Histone-fold	C:chromosome;C:nucleosome;C:nucleus;F:DNA binding;F:protein heterodimerization activity	AT1G13370_;AT1G75600_;AT4G40040_HTR8	0	0	0	0	0	0	0	0	0	0
A0A287TFZ0					0	0	0	0	0	0	0	0	0	-1	0	0	0	0	0	0	0	0	0	1	0	1	0	0	0	1	1	HORVU6Hr1G016890		Chlorophyll a-b binding protein, chloroplastic	NA	A0A287TFK2;A0A287TFK3;A0A287TFK8;A0A287TFZ0;A0A287TFZ1;M0YS81	IPR001344|Chlorophyll A-B binding protein, plant;IPR022796|Chlorophyll A-B binding protein;IPR023329|Chlorophyll a/b binding domain superfamily	C:chloroplast;C:chloroplast envelope;C:chloroplast thylakoid membrane;C:integral component of membrane;C:membrane;C:photosystem I;C:photosystem II;C:plastid;C:plastoglobule;C:thylakoid;F:chlorophyll binding;P:photosynthesis;P:photosynthesis, light harvesting;P:photosynthesis, light harvesting in photosystem I;P:protein-chromophore linkage;P:response to light stimulus	AT1G29910_LHCB1.1;AT1G29920_LHCB1.1;AT1G29930_LHCB1.3;AT2G34420_LHB1B2;AT2G34430_LHB1B1	0	0	0	-1	0	-1	0	-1	-1	-1
A0A287THZ1					0	0	0	1	0	1	1	0	0	0	0	0	0	0	0	0	0	0	2	1	0	2	0	1	1	2	3	HORVU6Hr1G019080	HORVU.MOREX.r3.6HG0556420		NA	A0A287THK5;A0A287THK9;A0A287THL0;A0A287THL9;A0A287THM1;A0A287THM4;A0A287THM6;A0A287THM7;A0A287THM9;A0A287THN1;A0A287THN2;A0A287THN4;A0A287THN7;A0A287THN9;A0A287THP2;A0A287THP4;A0A287THP9;A0A287THQ4;A0A287THR0;A0A287THX9;A0A287THY5;A0A287THZ1;A0A287THZ4;A0A287THZ6;A0A287TI00;A0A287TI06;A0A287TI07;A0A287TI13;A0A287TI18	IPR003439|ABC transporter-like;IPR003593|AAA+ ATPase domain;IPR013525|ABC-2 type transporter;IPR013581|Plant PDR ABC transporter associated;IPR027417|P-loop containing nucleoside triphosphate hydrolase;IPR034003|ATP-binding cassette transporter, PDR-like subfamily G, domain 2	C:integral component of membrane;C:membrane;C:plasma membrane;F:ATP binding;F:ATPase activity;F:ATPase-coupled transmembrane transporter activity;F:nucleotide binding;P:transmembrane transport		0	0	0	0	0	0	0	0	0	0
A0A287TR47					1	0	1	0	0	0	0	0	0	0	0	0	1	1	1	1	1	1	2	0	6	3	2	3	5	3	8	HORVU6Hr1G029190	HORVU.MOREX.r3.6HG0568900		NA	A0A287TQN4;A0A287TQS9;A0A287TQT4;A0A287TQX2;A0A287TR47;A0A287TR51	IPR000164|Histone H3/CENP-A;IPR007125|Histone H2A/H2B/H3;IPR009072|Histone-fold	C:chromosome;C:nucleosome;C:nucleus;F:DNA binding;F:protein heterodimerization activity		0	0	0	0	0	0	0	0	0	0
A0A287TVH7					0	0	0	0	0	0	0	0	0	-1	0	0	0	0	0	0	0	0	0	1	0	1	0	0	0	1	1	HORVU6Hr1G033160			NA	A0A287TUT0;A0A287TUT4;A0A287TUT5;A0A287TUU0;A0A287TUU5;A0A287TUU9;A0A287TUV0;A0A287TUV9;A0A287TUY0;A0A287TUZ0;A0A287TUZ1;A0A287TV01;A0A287TV07;A0A287TVF2;A0A287TVG2;A0A287TVG7;A0A287TVH2;A0A287TVH7;F2DAN8;M0XRB4	IPR001344|Chlorophyll A-B binding protein, plant;IPR022796|Chlorophyll A-B binding protein;IPR023329|Chlorophyll a/b binding domain superfamily;IPR036424|Decaprenyl diphosphate synthase-like superfamily;IPR038887|Dehydrodolichyl diphosphate synthase complex subunit Nus1;|	C:chloroplast;C:chloroplast thylakoid membrane;C:dehydrodolichyl diphosphate synthase complex;C:integral component of membrane;C:membrane;C:photosystem I;C:photosystem II;C:plastid;C:thylakoid;F:chlorophyll binding;F:transferase activity, transferring alkyl or aryl (other than methyl) groups;P:angiogenesis;P:dolichol biosynthetic process;P:photosynthesis;P:photosynthesis, light harvesting;P:prote…	AT1G11755_LEW1	0	0	0	-1	0	-1	0	0	0	0
A0A287TXN8					0	0	0	0	0	0	0	0	0	0	0	1	0	0	0	0	0	0	0	1	0	0	0	1	0	1	1	HORVU6Hr1G036810	HORVU.MOREX.r3.6HG0577130		NA	A0A287TXN3;A0A287TXN8;A0A287TXP6;A0A287TXQ4;A0A287TXU9;A0A287TXV2;A0A287TXV7;A0A287TYI0;F2CS67;M0V4T9	IPR000504|RNA recognition motif domain;IPR012677|Nucleotide-binding alpha-beta plait domain superfamily;IPR035979|RNA-binding domain superfamily;|	C:nuclear speck;C:nucleus;F:mRNA binding;F:nucleic acid binding;F:RNA binding;P:mRNA cis splicing, via spliceosome;P:regulation of alternative mRNA splicing, via spliceosome		0	0	0	0	0	0	0	0	0	0
A0A218LNB6	metabolic process;transport	membrane	metal ion binding	Pf00283, Pf00284	0	0	0	0	0	0	0	0	0	0	0	0	0	0	0	0	0	-1	0	0	1	0	0	1	0	1	1	HORVU6Hr1G049320		Cytochrome b559 subunit alpha	NA	A0A218LNB6;S4Z199	IPR006216|Photosystem II cytochrome b559, conserved site;IPR006217|Photosystem II cytochrome b559, alpha subunit;IPR013081|Photosystem II cytochrome b559, N-terminal;IPR013082|Photosystem II cytochrome b559, alpha subunit, lumenal region;IPR037025|Photosystem II cytochrome b559, alpha subunit superfamily	C:chloroplast;C:chloroplast thylakoid membrane;C:integral component of membrane;C:membrane;C:photosystem II;C:photosystem II reaction center;C:plastid;C:thylakoid;F:electron transfer activity;F:heme binding;F:iron ion binding;F:metal ion binding;P:oxidation-reduction process;P:photosynthesis;P:photosynthesis, light reaction;P:photosynthetic electron transport chain	ATCG00580_PSBE	0	0	0	0	0	0	0	0	0	0
S4Z1A6	metabolic process	ribosome	RNA binding;structural molecule activity	Pf00238	0	0	0	0	-1	0	0	0	0	-1	0	0	0	0	0	0	0	0	1	1	0	1	1	0	0	2	2	HORVU6Hr1G049460		50S ribosomal protein L14, chloroplastic	NA	A0A218LNP1;S4Z1A6	IPR000218|Ribosomal protein L14P;IPR005745|Ribosomal protein L14P, bacterial-type;IPR019972|Ribosomal protein L14P, conserved site;IPR036853|Ribosomal protein L14 superfamily	C:chloroplast;C:large ribosomal subunit;C:mitochondrial large ribosomal subunit;C:plastid;C:ribosome;F:large ribosomal subunit rRNA binding;F:RNA binding;F:rRNA binding;F:structural constituent of ribosome;P:translation	ATCG00780_RPL14	0	0	0	0	0	-1	0	0	0	0
A0A287U813					0	0	0	0	0	0	0	0	0	0	0	0	0	-1	-1	0	0	0	0	0	2	0	1	1	2	0	2	HORVU6Hr1G054640	HORVU.MOREX.r3.6HG0592240		NA	A0A287U813;A0A287U853;F2D0F3	IPR009360|Pre-mRNA-splicing factor Isy1;IPR029012|Helix hairpin bin domain superfamily;IPR037200|Pre-mRNA-splicing factor Isy1 superfamily	C:catalytic step 2 spliceosome;C:post-mRNA release spliceosomal complex;C:post-spliceosomal complex;C:Prp19 complex;F:first spliceosomal transesterification activity;P:generation of catalytic spliceosome for second transesterification step;P:mRNA 3'-splice site recognition	AT3G18790_	0	0	0	0	0	0	0	0	0	0
A0A287U8S1					0	1	1	0	0	-1	0	0	0	-1	0	0	1	1	1	0	1	0	3	1	4	2	3	3	5	3	8	HORVU6Hr1G054940	HORVU.MOREX.r3.6HG0592460		NA	A0A287U888;A0A287U8C5;A0A287U8D0;A0A287U8D4;A0A287U8D9;A0A287U8G7;A0A287U8S1	IPR004588|4-hydroxy-3-methylbut-2-en-1-yl diphosphate synthase, bacterial-type;IPR011005|Dihydropteroate synthase-like;IPR017178|4-hydroxy-3-methylbut-2-en-1-yl diphosphate synthase, atypical	C:chloroplast;C:chloroplast envelope;C:chloroplast stroma;F:4 iron, 4 sulfur cluster binding;F:4-hydroxy-3-methylbut-2-en-1-yl diphosphate synthase activity;F:iron ion binding;P:cellular metabolic process;P:isopentenyl diphosphate biosynthetic process, methylerythritol 4-phosphate pathway;P:isoprenoid biosynthetic process;P:oxidation-reduction process;P:response to bacterium;P:systemic acquired r…	AT5G60600_ISPG	0	0	0	0	0	0	0	0	0	0
A0A287U980					0	0	0	0	0	0	0	0	0	0	0	0	0	0	0	0	-1	0	0	0	1	0	1	0	0	1	1	HORVU6Hr1G056490	HORVU.MOREX.r3.6HG0593920		NA	A0A287U945;A0A287U951;A0A287U980;A0A287U992;A0A287U9C4;A0A287U9C8;A0A287U9N2	IPR016024|Armadillo-type fold;IPR039776|Sister chromatid cohesion protein Pds5;|	C:chromatin;C:nucleus;P:DNA repair;P:mitotic sister chromatid cohesion	AT1G15940_;AT1G80810_;AT4G31880_;AT5G10950_	0	0	0	0	0	0	0	0	0	0
Q9SME4	metabolic process;regulation of biological process;response to stimulus		antioxidant activity;catalytic activity	Pf00255, Pf00578, Pf08534	0	0	0	1	0	0	0	0	0	0	0	0	0	0	0	0	0	0	1	0	0	1	0	0	0	1	1	HORVU6Hr1G063830	HORVU.MOREX.r3.6HG0601920	Glutathione peroxidase	NA	A0A287UF35;A0A287UF79;A0A287UF81;A0A287UF86;A0A287UF89;A0A287UF97;A0A287UFA2;A0A287UFL8;F2CPX8;Q852R3;Q9SME4;Q9SME6	IPR000889|Glutathione peroxidase;IPR029759|Glutathione peroxidase active site;IPR029760|Glutathione peroxidase conserved site;IPR036249|Thioredoxin-like superfamily;|	C:chloroplast;C:cytosol;C:mitochondrion;C:plasma membrane;F:glutathione peroxidase activity;F:oxidoreductase activity;F:peroxidase activity;P:cellular oxidant detoxification;P:oxidation-reduction process;P:regulation of root development;P:regulation of shoot system development;P:response to cadmium ion;P:response to oxidative stress	AT4G11600_GPX6	0	0	0	0	0	0	0	0	0	0
M0ZDL4			protein binding		0	0	0	0	0	0	0	0	0	0	0	0	0	0	0	0	0	-1	0	0	1	0	0	1	0	1	1	HORVU6Hr1G066250			NA	M0ZDL4	IPR011990|Tetratricopeptide-like helical domain superfamily	F:protein binding	AT5G65520_	0	0	0	0	0	0	0	0	0	0
A0A287UID7					0	0	0	0	-1	0	0	0	0	0	0	0	0	0	0	0	0	-1	1	0	1	0	1	1	0	2	2	HORVU6Hr1G067660	HORVU.MOREX.r3.6HG0606220		NA	A0A287UID1;A0A287UID7;A0A287UIF0;A0A287UIF5;A0A287UIG8;A0A287UIG9;A0A287UIH3;A0A287UIR4;A0A287UIR9;F2DD69	IPR006082|Phosphoribulokinase;IPR006083|Phosphoribulokinase/uridine kinase;IPR027417|P-loop containing nucleoside triphosphate hydrolase;|	C:apoplast;C:chloroplast;C:chloroplast envelope;C:chloroplast stroma;C:chloroplast thylakoid membrane;C:supramolecular complex;C:thylakoid;F:ATP binding;F:disordered domain specific binding;F:kinase activity;F:phosphoribulokinase activity;F:protein homodimerization activity;P:carbohydrate metabolic process;P:defense response to bacterium;P:phosphorylation;P:response to cold	AT1G32060_PRK	0	0	0	-1	0	-1	0	0	0	0
M0VKT2	metabolic process	cytoplasm	catalytic activity;metal ion binding	Pf00719	1	0	1	0	0	0	0	0	0	-1	0	0	1	1	0	0	0	-1	2	1	3	3	1	2	4	2	6	HORVU6Hr1G068760	HORVU.MOREX.r3.6HG0607470		NA	A0A287UJD3;A0A287UJE5;A0A287UJG2;A0A287UJG4;A0A287UJG5;A0A287UJU6;A0A287UJV5;M0VKT2	IPR008162|Inorganic pyrophosphatase;IPR036649|Inorganic pyrophosphatase superfamily	C:cytoplasm;C:cytosol;C:nucleoplasm;F:inorganic diphosphatase activity;F:magnesium ion binding;P:cell wall pectin metabolic process;P:cell wall thickening;P:phosphate-containing compound metabolic process	AT2G18230_PPA2	0	0	0	0	0	0	0	0	0	0
A0A287UKZ4					0	0	0	0	0	1	0	0	0	0	0	0	0	0	0	0	0	0	1	0	0	0	0	1	0	1	1	HORVU6Hr1G070560	HORVU.MOREX.r3.6HG0609640		NA	A0A287UKY8;A0A287UKZ4;A0A287UKZ8;A0A287UL00;A0A287UL06;A0A287UL11;A0A287UL12;A0A287UL16;A0A287UL17;A0A287UL18;A0A287UL21;A0A287UL23;A0A287UL28;A0A287ULD4;A0A287ULD9;A0A287ULE4;A0A287ULE9	IPR011990|Tetratricopeptide-like helical domain superfamily;IPR013026|Tetratricopeptide repeat-containing domain;IPR019734|Tetratricopeptide repeat;IPR023231|GSKIP domain superfamily;IPR025697|CLU domain;IPR028275|Clustered mitochondria protein, N-terminal;IPR033646|CLU central domain	C:chloroplast;C:cytoplasm;C:cytosol;C:plasma membrane;F:protein binding;P:intracellular distribution of mitochondria;P:positive regulation of mitochondrial fusion	AT3G52140_	0	0	0	0	0	0	0	0	0	0
A0A287UL55					0	0	0	0	0	0	0	0	0	0	0	0	-1	-1	0	0	-1	-1	0	0	4	1	2	1	2	2	4	HORVU6Hr1G070670			NA	A0A287UL30;A0A287UL45;A0A287UL55;A0A287UL56;A0A287ULI2	IPR000054|Ribosomal protein L31e;IPR023621|Ribosomal protein L31e domain superfamily	C:cytosolic large ribosomal subunit;C:integral component of membrane;C:membrane;C:ribosome;F:structural constituent of ribosome;P:cytoplasmic translation;P:translation	AT2G19740_RPL31A;AT4G26230_RPL31B;AT5G56710_RPL31C	0	0	0	0	0	0	0	0	0	0
A0A287UM54					0	0	0	1	0	1	0	0	0	0	0	0	0	-1	0	0	0	0	2	0	1	1	1	1	1	2	3	HORVU6Hr1G071910	HORVU.MOREX.r3.6HG0610930		NA	A0A287UM11;A0A287UM13;A0A287UM16;A0A287UM18;A0A287UM21;A0A287UM22;A0A287UM23;A0A287UM27;A0A287UM32;A0A287UM54;A0A287UM58;A0A287UM66;A0A287UMF5;A0A287UMG0;A0A287UMG6	IPR001680|WD40 repeat;IPR015943|WD40/YVTN repeat-like-containing domain superfamily;IPR017986|WD40-repeat-containing domain;IPR032401|Enhancer of mRNA-decapping protein 4, WD40 repeat region;IPR036322|WD40-repeat-containing domain superfamily;|	C:P-body;F:protein binding;P:deadenylation-independent decapping of nuclear-transcribed mRNA	AT3G13290_VCR;AT3G13300_VCS	0	0	0	0	0	0	0	0	0	0
F2DS83				Pf08555	0	0	0	0	0	0	0	0	0	0	0	0	0	0	0	0	1	1	0	0	2	0	1	1	0	2	2	HORVU6Hr1G072370	HORVU.MOREX.r3.6HG0611370	Predicted protein	NA	F2DS83	IPR013865|Protein FAM32A	C:nucleolus	AT1G16810_	0	0	0	0	0	0	0	0	0	0
F2EBI3	metabolic process	membrane	catalytic activity;nucleotide binding		0	0	0	0	0	0	0	0	0	-1	0	0	1	1	0	0	0	0	0	1	2	2	1	0	2	1	3	HORVU6Hr1G075900	HORVU.MOREX.r3.6HG0615360	Predicted protein	NA	F2EBI3	IPR002938|FAD-binding domain;IPR010253|Geranylgeranyl reductase, plant/prokaryotic;IPR011774|Geranylgeranyl reductase, plant/cyanobacteria;IPR011777|Geranylgeranyl reductase family;IPR036188|FAD/NAD(P)-binding domain superfamily	C:chloroplast;C:chloroplast envelope;C:chloroplast thylakoid;C:chloroplast thylakoid membrane;F:FAD binding;F:geranylgeranyl reductase activity;F:oxidoreductase activity, acting on the CH-CH group of donors;F:oxidoreductase activity, acting on the CH-CH group of donors, NAD or NADP as acceptor;P:chlorophyll biosynthetic process;P:cofactor biosynthetic process;P:oxidation-reduction process;P:photo…	AT1G74470_CHLP	0	0	0	0	0	0	0	0	0	0
A0A287UT09					0	1	1	0	0	-1	1	0	0	0	0	0	0	0	-1	0	0	0	3	1	1	1	1	3	4	1	5	HORVU6Hr1G077890	HORVU.MOREX.r3.6HG0617080		NA	A0A287UT09;A0A287UTG0;F2CTP1	IPR016140|Bifunctional inhibitor/plant lipid transfer protein/seed storage helical domain;IPR036312|Bifunctional inhibitor/plant lipid transfer protein/seed storage helical domain superfamily	C:integral component of membrane;C:membrane		0	0	0	0	0	0	0	0	0	0
A0A287UW94					0	0	1	0	0	0	0	0	0	0	0	0	0	0	0	0	1	0	1	0	1	0	1	1	1	1	2	HORVU6Hr1G080480	HORVU.MOREX.r3.6HG0619360		NA	A0A287UVQ9;A0A287UVR0;A0A287UVR2;A0A287UVR4;A0A287UVR8;A0A287UVV6;A0A287UVW3;A0A287UW89;A0A287UW94	IPR018108|Mitochondrial substrate/solute carrier;IPR023395|Mitochondrial carrier domain superfamily	C:integral component of membrane;C:integral component of mitochondrial inner membrane;C:membrane;F:inorganic phosphate transmembrane transporter activity;P:phosphate ion transmembrane transport	AT5G14040_MPT3	0	0	0	0	0	0	0	0	0	0
F2CXD7				Pf02036, Pf14864	1	1	0	0	0	0	0	0	0	0	0	0	0	0	0	0	0	0	2	0	0	1	1	0	2	0	2	HORVU6Hr1G080770	HORVU.MOREX.r3.6HG0619740	Predicted protein	NA	A0A287UWI3;F2CXD7	IPR003033|SCP2 sterol-binding domain;IPR036527|SCP2 sterol-binding domain superfamily;IPR039543|Lipid-binding protein POX18/YhbT/NSL-TP1	C:cytosol	AT5G42890_ATSCP2	0	0	0	0	0	0	0	0	0	0
A3RHE3	response to stimulus				1	0	0	0	0	-1	0	0	0	1	0	1	0	1	1	0	0	0	2	2	2	2	1	3	3	3	6	HORVU6Hr1G084070	HORVU.MOREX.r3.6HG0622770	Deyhydrin 4	P12948;P12949	A0A287UZB4;A0A287UZB9;A0A287UZC1;A0A287UZC5;A0A287UZC6;A0A287UZC9;A0A287UZD3;A0A287UZE3;A0A287UZE9;A0A287UZS8;A0A287UZT3;A3RHE3;Q43477;Q9SPA8;Q9SPA9;Q9ZTR6;Q9ZTR7	IPR000167|Dehydrin;IPR030513|Dehydrin, conserved site	C:cytosol;P:cold acclimation;P:response to abscisic acid;P:response to water;P:response to water deprivation		0	0	0	1	0	1	1	0	1	1
A0A287V2I9					0	0	0	0	1	0	0	0	0	0	0	0	0	0	0	0	0	-1	1	0	1	0	1	1	0	2	2	HORVU6Hr1G087650	HORVU.MOREX.r3.6HG0626650		NA	A0A287V2I6;A0A287V2I9	IPR003593|AAA+ ATPase domain;IPR003959|ATPase, AAA-type, core;IPR003960|ATPase, AAA-type, conserved site;IPR005937|26S proteasome regulatory subunit P45-like;IPR027417|P-loop containing nucleoside triphosphate hydrolase;IPR032501|Proteasomal ATPase OB C-terminal domain;IPR041569|AAA ATPase, AAA+ lid domain	C:cytoplasm;C:cytosol;C:nucleus;C:plasma membrane;C:proteasome complex;C:proteasome regulatory particle, base subcomplex;C:protein-containing complex;F:ATP binding;F:hydrolase activity;F:nucleotide binding;F:proteasome-activating ATPase activity;P:embryo sac development;P:glucose mediated signaling pathway;P:pollen development;P:positive regulation of RNA polymerase II transcriptional preinitiati…	AT1G09100_RPT5B	0	0	0	0	0	0	0	0	0	0
A0A287V3E2					0	0	-1	0	0	0	0	0	0	0	0	0	-1	-1	0	0	-1	-1	1	0	4	1	2	2	3	2	5	HORVU6Hr1G088570	HORVU.MOREX.r3.6HG0627470		NA	A0A287V3D7;A0A287V3E2;A0A287V3E6;A0A287V3E9;A0A287V3F5;A0A287V3V2;A0A287V3V7;F2CRV5	IPR008942|ENTH/VHS;IPR013809|ENTH domain;IPR039416|Epsin, ENTH domain;|		AT2G43160_EPSIN2;AT3G59290_EPSIN3	0	0	0	0	0	0	0	0	0	0
A8CCK8	cellular homeostasis;metabolic process;regulation of biological process		antioxidant activity;catalytic activity;nucleotide binding	Pf00070, Pf02852, Pf03486, Pf07992, Pf13434	0	0	0	0	0	0	0	0	0	0	0	1	0	0	0	0	-1	-1	0	1	2	0	1	2	0	3	3	HORVU6Hr1G089780	HORVU.MOREX.r3.6HG0628590		NA	A0A287V4I3;A0A287V4J0;A0A287V4Y4;A8CCK8;Q8LPA8;Q8LPA9	IPR004099|Pyridine nucleotide-disulphide oxidoreductase, dimerisation domain;IPR016156|FAD/NAD-linked reductase, dimerisation domain superfamily;IPR023753|FAD/NAD(P)-binding domain;IPR036188|FAD/NAD(P)-binding domain superfamily	C:cell;C:cytoplasm;F:electron transfer activity;F:flavin adenine dinucleotide binding;F:glutathione-disulfide reductase activity;F:NADP binding;F:nucleotide binding;F:oxidoreductase activity;F:thioredoxin-disulfide reductase activity;P:cell redox homeostasis;P:cellular oxidant detoxification;P:electron transport chain;P:glutathione metabolic process;P:oxidation-reduction process	AT3G24170_ATGR1	0	0	0	0	0	0	0	0	0	0
F2DBI7			nucleotide binding;protein binding	Pf00931, Pf12799, Pf13191, Pf13401, Pf13855	0	0	0	0	0	0	0	0	-1	0	-1	-1	1	1	1	0	0	-1	0	3	4	1	2	4	4	3	7	HORVU6Hr1G092250	HORVU.MOREX.r3.6HG0630920	Predicted protein	NA	F2DBI7;Q84KC6;Q84KE5	IPR001611|Leucine-rich repeat;IPR002182|NB-ARC;IPR003591|Leucine-rich repeat, typical subtype;IPR027417|P-loop containing nucleoside triphosphate hydrolase;IPR032675|Leucine-rich repeat domain superfamily;IPR038005|Virus X resistance protein-like, coiled-coil domain;IPR041118|Rx, N-terminal	F:ADP binding;F:protein binding		0	0	0	0	0	0	0	0	0	0
F2DBI7			nucleotide binding;protein binding	Pf00931, Pf12799, Pf13191, Pf13401, Pf13855	0	0	0	0	0	0	0	0	-1	0	-1	-1	1	1	1	0	0	-1	0	3	4	1	2	4	4	3	7	HORVU6Hr1G092370	HORVU.MOREX.r3.6HG0630920	Predicted protein	NA	F2DBI7	IPR001611|Leucine-rich repeat;IPR002182|NB-ARC;IPR003591|Leucine-rich repeat, typical subtype;IPR027417|P-loop containing nucleoside triphosphate hydrolase;IPR032675|Leucine-rich repeat domain superfamily;IPR038005|Virus X resistance protein-like, coiled-coil domain;IPR041118|Rx, N-terminal	F:ADP binding;F:protein binding		0	0	0	0	0	0	0	0	0	0
P08248	metabolic process;transport	membrane	metal ion binding	Pf00127, Pf13473	0	0	0	0	0	0	1	1	1	0	0	0	0	0	-1	0	0	0	0	3	1	1	1	2	4	0	4	HORVU7Hr1G000900	HORVU.MOREX.r3.7HG0634340	Plastocyanin	P08248	F2D7P5	IPR000923|Blue (type 1) copper domain;IPR001235|Blue (type 1) copper protein, plastocyanin-type;IPR002387|Plastocyanin;IPR008972|Cupredoxin;IPR028871|Blue (type 1) copper protein, binding site	C:chloroplast;C:chloroplast thylakoid membrane;C:membrane;C:plastid;C:thylakoid;F:copper ion binding;F:electron transfer activity;F:metal ion binding;P:electron transport chain;P:oxidation-reduction process		0	0	0	-1	0	-1	0	0	0	0
A0A287VDK5					0	0	1	0	0	0	0	0	0	0	0	0	1	0	0	0	0	0	1	0	1	1	0	1	2	0	2	HORVU7Hr1G002210	HORVU.MOREX.r3.7HG0636640	Ferredoxin--NADP reductase, chloroplastic	NA	A0A287VDF2;A0A287VDF5;A0A287VDG0;A0A287VDK0;A0A287VDK2;A0A287VDK5;A0A287VDK6;A0A287VDK8	IPR001433|Oxidoreductase FAD/NAD(P)-binding;IPR001709|Flavoprotein pyridine nucleotide cytochrome reductase;IPR015701|Ferredoxin--NADP reductase;IPR017927|FAD-binding domain, ferredoxin reductase-type;IPR017938|Riboflavin synthase-like beta-barrel;IPR035442|Ferredoxin--NADP reductase, plant and Cyanobacteria type;IPR039261|Ferredoxin-NADP reductase (FNR), nucleotide-binding domain	C:chloroplast;C:chloroplast thylakoid membrane protein complex;C:integral component of membrane;C:membrane;F:ferredoxin-NADP+ reductase activity;F:oxidoreductase activity;P:oxidation-reduction process	AT1G20020_LFNR2;AT5G66190_LFNR1	0	0	0	0	0	0	0	0	0	0
M0XC90			RNA binding	Pf00076, Pf08777, Pf14259	0	0	0	1	0	1	0	0	0	1	1	1	0	0	0	0	0	0	2	3	0	2	1	2	0	5	5	HORVU7Hr1G003710	HORVU.MOREX.r3.7HG0638160		NA	A0A287VEL4;A0A287VEN7;M0XC90	IPR000504|RNA recognition motif domain;IPR012677|Nucleotide-binding alpha-beta plait domain superfamily;IPR035979|RNA-binding domain superfamily;|	F:nucleic acid binding;F:RNA binding	AT4G17720_;AT5G16840_BPA1;AT5G46870_	0	0	0	0	0	0	0	0	0	0
A0A287VF07					0	0	1	0	0	0	0	0	0	0	0	0	1	0	0	0	0	0	1	0	1	1	0	1	2	0	2	HORVU7Hr1G006160	HORVU.MOREX.r3.7HG0639100	6-phosphogluconate dehydrogenase, decarboxylating	NA	A0A287VEU7;A0A287VEZ8;A0A287VF07;M0VF49;M0VF50	IPR006113|6-phosphogluconate dehydrogenase, decarboxylating;IPR006114|6-phosphogluconate dehydrogenase, C-terminal;IPR006115|6-phosphogluconate dehydrogenase, NADP-binding;IPR006183|6-phosphogluconate dehydrogenase;IPR008927|6-phosphogluconate dehydrogenase-like, C-terminal domain superfamily;IPR013328|6-phosphogluconate dehydrogenase, domain 2;IPR036291|NAD(P)-binding domain superfamily	C:cytosol;F:NADP binding;F:oxidoreductase activity;F:phosphogluconate dehydrogenase (decarboxylating) activity;P:D-gluconate catabolic process;P:D-gluconate metabolic process;P:oxidation-reduction process;P:pentose-phosphate shunt;P:pentose-phosphate shunt, oxidative branch;P:response to abscisic acid;P:response to cold;P:response to salt stress;P:response to water deprivation	AT3G02360_PGD2	0	0	0	0	0	0	0	0	0	0
A0A287VF44					0	0	0	0	0	0	0	0	0	-1	0	0	0	0	0	0	0	0	0	1	0	1	0	0	0	1	1	HORVU7Hr1G006490	HORVU.MOREX.r3.7HG0639380		NA	A0A287VF44;A0A287VF48;A0A287VF64;A0A287VF68;A0A287VF73;A0A287VF90;A0A287VF98;A0A287VFA4;A0A287VFA9;A0A287VFD1;A0A287VFE1	IPR001844|Chaperonin Cpn60;IPR002423|Chaperonin Cpn60/TCP-1 family;IPR018370|Chaperonin Cpn60, conserved site;IPR027409|GroEL-like apical domain superfamily;IPR027410|TCP-1-like chaperonin intermediate domain superfamily;IPR027413|GroEL-like equatorial domain superfamily	C:cytoplasm;C:cytosol;F:ATP binding;F:unfolded protein binding;P:'de novo' protein folding;P:protein folding;P:protein import into mitochondrial intermembrane space;P:protein refolding	AT1G55490_CPN60B1;AT3G13470_CPN60B2;AT5G56500_CPN60B3	0	0	0	0	0	0	0	0	0	0
Q9M4D6	metabolic process		catalytic activity	Pf03767	0	0	0	0	0	0	0	0	0	0	0	0	0	1	1	0	0	0	0	0	2	0	1	1	2	0	2	HORVU7Hr1G010690	HORVU.MOREX.r3.7HG0642890		NA	A0A287VHX3;A0A287VHY2;A0A287VHY4;A0A287VHZ0;A0A287VHZ8;A0A287VI02;A0A287VI08;A0A287VI15;A0A287VI18;A0A287VI92;A0A287VI98;Q9M4D6	IPR005519|Acid phosphatase, class B-like;IPR010028|Acid phosphatase, plant;IPR014403|Vegetative storage protein/acid phosphatase;IPR023214|HAD superfamily;IPR036412|HAD-like superfamily	F:acid phosphatase activity;P:dephosphorylation	AT5G24770_VSP2;AT5G24780_VSP1	0	0	0	-1	0	-1	0	0	0	0
A0A287VMX4					1	1	1	0	0	0	0	0	0	0	0	0	0	0	0	0	0	0	3	0	0	1	1	1	3	0	3	HORVU7Hr1G021510	HORVU.MOREX.r3.7HG0650600		NA	A0A287VMW5;A0A287VMW8;A0A287VMX3;A0A287VMX4;A0A287VMX5;A0A287VMX7;A0A287VMY0;A0A287VMY1;A0A287VMY3;A0A287VMY8;A0A287VMZ0;A0A287VMZ2;A0A287VMZ3;A0A287VMZ5;A0A287VMZ6;A0A287VMZ8;A0A287VMZ9;A0A287VN00;A0A287VN03;A0A287VN05;A0A287VN08;A0A287VN09;A0A287VN14;A0A287VN17;A0A287VN18;A0A287VN22;A0A287VN24;A0A287VN27;A0A287VN30;A0A287VN35;A0A287VND0;A0A287VNE1;A0A287VNE6;A0A287VNF5;A0A287VNG8;A0A287VNH2;M0X…	IPR001930|Peptidase M1, alanine aminopeptidase/leukotriene A4 hydrolase;IPR012779|Peptidase M1, alanyl aminopeptidase;IPR014782|Peptidase M1, membrane alanine aminopeptidase;IPR024601|Peptidase M1, alanyl aminopeptidase, C-terminal;IPR027268|Peptidase M4/M1, CTD superfamily;IPR035414|Peptidase M1, alanyl aminopeptidase, Ig-like fold;IPR037144|Peptidase M1, alanyl aminopeptidase, C-terminal domain…	C:chloroplast;C:cytoplasm;F:aminopeptidase activity;F:metallopeptidase activity;F:zinc ion binding;P:peptide catabolic process;P:proteolysis	AT1G63770_	0	0	0	0	0	0	0	0	0	0
A0A287VQP9					0	0	0	0	0	0	0	0	0	0	0	0	0	0	0	-1	0	0	0	0	1	1	0	0	0	1	1	HORVU7Hr1G024570	HORVU.MOREX.r3.7HG0653850		NA	A0A287VQP9	IPR012875|Succinate dehydrogenase assembly factor 4	C:mitochondrion;P:mitochondrial respiratory chain complex II assembly;P:tricarboxylic acid cycle	AT5G67490_	0	0	0	0	0	0	0	0	0	0
Q05968	defense response;response to stimulus	extracellular		Pf00188	1	1	0	0	0	0	0	0	0	0	0	0	0	0	-1	0	0	0	2	0	1	1	1	1	3	0	3	HORVU7Hr1G033530	HORVU.MOREX.r3.7HG0661640		P35792;P35793;Q05968	A0A287VZ35;A0A287VZ59;A0A287VZ68;A0A287VZR6	IPR001283|Cysteine-rich secretory protein-related;IPR002413|Venom allergen 5-like;IPR014044|CAP domain;IPR018244|Allergen V5/Tpx-1-related, conserved site;IPR034111|Pathogenesis-related protein 1-like, SCP domain;IPR035940|CAP superfamily	C:extracellular region;C:extracellular space;P:defense response;P:response to biotic stimulus	AT2G14580_PRB1;AT2G14610_PR1;AT2G19970_;AT2G19980_;AT2G19990_PR-1-LIKE;AT3G19690_;AT4G07820_;AT4G33710_;AT4G33720_;AT5G26130_	0	0	0	0	0	0	0	0	0	0
F2CYS2	metabolic process	mitochondrion;organelle lumen		Pf00550, Pf14573	-1	0	0	0	0	0	-1	0	-1	0	0	0	-1	-1	0	-1	-1	-1	1	2	5	4	2	2	5	3	8	HORVU7Hr1G037330	HORVU.MOREX.r3.7HG0665540	Acyl carrier protein	NA	A0A287W2C4;A0A287W2E4;A0A287W2L0;F2CYS2	IPR003231|Acyl carrier protein (ACP);IPR006162|Phosphopantetheine attachment site;IPR009081|Phosphopantetheine binding ACP domain;IPR036736|ACP-like superfamily;|	C:mitochondrial matrix;C:mitochondrion;F:acyl binding;F:acyl carrier activity;P:fatty acid biosynthetic process	AT2G44620_MTACP1	0	0	0	0	0	0	0	0	0	0
M0WMV2				Pf04969	0	0	0	0	0	0	0	0	0	0	0	0	0	0	0	-1	0	0	0	0	1	1	0	0	0	1	1	HORVU7Hr1G038520	HORVU.MOREX.r3.7HG0666750		NA	A0A287W418;A0A287W481;A0A287W484;A0A287W4W8;A0A287W4X4;F2E732;M0WMV2	IPR007052|CS domain;IPR008978|HSP20-like chaperone;IPR037898|NudC family;|	C:cytoplasm;F:unfolded protein binding;P:developmental process;P:protein folding	AT4G27890_BOB2;AT5G53400_BOB1	0	0	0	0	0	0	0	0	0	0
A0A287W543					0	0	1	0	1	0	0	0	0	0	0	0	0	0	0	0	0	0	2	0	0	0	1	1	1	1	2	HORVU7Hr1G038710	HORVU.MOREX.r3.7HG0666870		NA	A0A287W494;A0A287W4E5;A0A287W4G6;A0A287W543;F2DKE2	IPR002173|Carbohydrate/puine kinase, PfkB, conserved site;IPR011611|Carbohydrate kinase PfkB;IPR029056|Ribokinase-like	C:chloroplast stroma;C:cytosol;F:carbohydrate kinase activity;F:fructokinase activity;F:phosphotransferase activity, alcohol group as acceptor;P:carbohydrate biosynthetic process;P:carbohydrate phosphorylation;P:fatty acid biosynthetic process;P:fructose metabolic process	AT1G66430_	0	0	0	0	0	0	0	0	0	0
F2CWR0	metabolic process	mitochondrion	catalytic activity;nucleotide binding	Pf00389, Pf01408, Pf02826, Pf03720	0	0	0	0	0	0	0	0	0	0	0	1	0	0	0	0	0	0	0	1	0	0	0	1	0	1	1	HORVU7Hr1G047700	HORVU.MOREX.r3.7HG0676800	Formate dehydrogenase, mitochondrial	Q9ZRI8	A0A287WDC4;A0A287WDQ8;F2CWR0;M0Z139	IPR006139|D-isomer specific 2-hydroxyacid dehydrogenase, catalytic domain;IPR006140|D-isomer specific 2-hydroxyacid dehydrogenase, NAD-binding domain;IPR029752|D-isomer specific 2-hydroxyacid dehydrogenase, NAD-binding domain conserved site 1;IPR029753|D-isomer specific 2-hydroxyacid dehydrogenase, NAD-binding domain conserved site;IPR033689|NAD-dependent formate dehydrogenase;IPR036291|NAD(P)-bi…	C:chloroplast;C:formate dehydrogenase complex;C:mitochondrion;F:formate dehydrogenase (NAD+) activity;F:NAD binding;F:oxidoreductase activity;F:oxidoreductase activity, acting on the CH-OH group of donors, NAD or NADP as acceptor;P:formate catabolic process;P:oxidation-reduction process	AT5G14780_FDH1	0	0	0	1	0	1	0	0	0	1
M0YGB0			catalytic activity	Pf00266	0	0	0	0	0	0	0	0	0	0	0	0	1	0	0	0	0	0	0	0	1	1	0	0	1	0	1	HORVU7Hr1G049870	HORVU.MOREX.r3.7HG0678990		NA	A0A287WFL7;F2D4I5;M0YGB0	IPR000192|Aminotransferase class V domain;IPR015421|Pyridoxal phosphate-dependent transferase, major domain;IPR015422|Pyridoxal phosphate-dependent transferase domain 1;IPR015424|Pyridoxal phosphate-dependent transferase;IPR020578|Aminotransferase class-V, pyridoxal-phosphate binding site;IPR024169|Serine-pyruvate aminotransferase/2-aminoethylphosphonate-pyruvate transaminase	C:peroxisome;F:alanine-glyoxylate transaminase activity;F:catalytic activity;F:serine-pyruvate transaminase activity;P:glycine biosynthetic process, by transamination of glyoxylate	AT2G13360_AGT1	0	0	0	0	0	0	0	0	0	0
F2DD09	metabolic process	ribosome	RNA binding;structural molecule activity		-1	-1	-1	0	0	0	-1	-1	-1	0	0	-1	-1	-1	0	-1	0	-1	3	4	4	4	3	4	8	3	11	HORVU7Hr1G055890		Predicted protein	NA	F2DD09	IPR020526|Ribosomal protein L6, chloroplast	C:chloroplast;C:ribosome;F:rRNA binding;F:structural constituent of ribosome;P:translation	AT5G17870_PSRP6	0	0	0	0	0	0	0	0	0	0
A0A287WLF1					0	0	0	0	0	0	0	0	0	-1	0	0	0	0	0	1	1	1	0	1	3	2	1	1	0	4	4	HORVU7Hr1G056770	HORVU.MOREX.r3.7HG0686790		NA	A0A287WLF1;A0A287WLF3;A0A287WLH5;A0A287WLN9;F2CYT1	IPR002328|Alcohol dehydrogenase, zinc-type, conserved site;IPR011032|GroES-like superfamily;IPR013149|Alcohol dehydrogenase, C-terminal;IPR013154|Alcohol dehydrogenase, N-terminal;IPR020843|Polyketide synthase, enoylreductase domain;IPR036291|NAD(P)-binding domain superfamily	F:metal ion binding;F:oxidoreductase activity;F:zinc ion binding;P:oxidation-reduction process	AT5G51970_SDH	0	0	0	0	0	0	0	0	0	0
A0A287WLW1					0	0	0	0	0	0	0	0	0	0	0	0	1	0	0	0	0	0	0	0	1	1	0	0	1	0	1	HORVU7Hr1G057430	HORVU.MOREX.r3.7HG0687590		NA	A0A287WLU0;A0A287WLV3;A0A287WLW1;A0A287WLW2;A0A287WLW6;A0A287WM41;Q94IC3	IPR002016|Haem peroxidase;IPR002207|Class I peroxidase;IPR010255|Haem peroxidase superfamily;IPR019793|Peroxidases heam-ligand binding site;IPR019794|Peroxidase, active site	C:chloroplast;C:integral component of membrane;C:membrane;F:heme binding;F:peroxidase activity;P:cellular oxidant detoxification;P:cellular response to oxidative stress;P:hydrogen peroxide catabolic process;P:oxidation-reduction process;P:response to oxidative stress;P:response to reactive oxygen species		0	0	0	0	0	0	0	0	0	0
A0A287WN95					0	0	0	0	0	0	0	0	0	0	0	0	0	0	0	1	1	1	0	0	3	1	1	1	0	3	3	HORVU7Hr1G059290	HORVU.MOREX.r3.7HG0689440		NA	A0A287WN77;A0A287WN88;A0A287WN95	IPR007648|Mitochondrial ATPase inhibitor;|	C:mitochondrial respiratory chain complex I;C:mitochondrion;F:ATPase inhibitor activity;P:negative regulation of ATPase activity		0	0	0	0	0	0	0	0	0	0
F2DCE0	metabolic process		catalytic activity	Pf00056, Pf02866	0	0	0	0	0	0	0	0	0	0	0	0	1	0	0	0	0	0	0	0	1	1	0	0	1	0	1	HORVU7Hr1G060260	HORVU.MOREX.r3.7HG0690370	Predicted protein	NA	A0A287WNH2;A0A287WNH7;A0A287WNI2;A0A287WNI9;A0A287WNJ1;A0A287WNJ4;A0A287WNJ5;A0A287WNJ6;A0A287WNK1;A0A287WNU0;A0A287WNV0;F2DCE0	IPR001236|Lactate/malate dehydrogenase, N-terminal;IPR001252|Malate dehydrogenase, active site;IPR001557|L-lactate/malate dehydrogenase;IPR010945|Malate dehydrogenase, type 2;IPR011273|Malate dehydrogenase, NADP-dependent, plants;IPR015955|Lactate dehydrogenase/glycoside hydrolase, family 4, C-terminal;IPR022383|Lactate/malate dehydrogenase, C-terminal;IPR036291|NAD(P)-binding domain superfamily	F:catalytic activity;F:L-malate dehydrogenase activity;F:malate dehydrogenase (NADP+) activity;F:malate dehydrogenase activity;F:oxidoreductase activity;F:oxidoreductase activity, acting on the CH-OH group of donors, NAD or NADP as acceptor;P:carbohydrate metabolic process;P:carboxylic acid metabolic process;P:malate metabolic process;P:NADH metabolic process;P:oxaloacetate metabolic process;P:ox…	AT5G58330_	0	0	0	0	0	0	0	0	0	0
A0A287WPQ1					0	0	0	0	0	0	0	0	0	0	0	0	1	0	0	0	0	0	0	0	1	1	0	0	1	0	1	HORVU7Hr1G063280		60S ribosomal protein L27	NA	A0A287WPN5;A0A287WPQ1	IPR001141|Ribosomal protein L27e;IPR005824|KOW;IPR008991|Translation protein SH3-like domain superfamily;IPR018262|Ribosomal protein L27e, conserved site;IPR038655|Ribosomal protein L27e superfamily;IPR041991|Eukaryotic Ribosomal Protein L27, KOW domain	C:cytosolic large ribosomal subunit;C:intracellular;C:ribosome;F:structural constituent of ribosome;P:translation	AT2G32220_RPL27A;AT3G22230_RPL27B;AT4G15000_RPL27C	0	0	0	0	0	0	0	0	0	0
A0A287WQR6					0	0	0	-1	0	0	0	1	1	0	0	0	0	0	0	0	0	0	1	2	0	1	1	1	2	1	3	HORVU7Hr1G065240	HORVU.MOREX.r3.7HG0671730		NA	A0A287WQG4;A0A287WQG9;A0A287WQH7;A0A287WQH9;A0A287WQI2;A0A287WQI6;A0A287WQL8;A0A287WQM4;A0A287WQR1;A0A287WQR6	IPR000253|Forkhead-associated (FHA) domain;IPR008984|SMAD/FHA domain superfamily;|	C:membrane;F:protein binding	AT5G38840_	0	0	0	0	0	0	0	0	0	0
A0A287WRG3					0	0	0	0	0	0	0	0	0	0	0	0	0	0	0	0	-1	0	0	0	1	0	1	0	0	1	1	HORVU7Hr1G067060		60S ribosomal protein L13	NA	A0A287WRG3;A0A287WRL8;O48612	IPR001380|Ribosomal protein L13e;IPR018256|Ribosomal protein L13e, conserved site	C:cytosolic large ribosomal subunit;C:intracellular;C:ribosome;F:RNA binding;F:structural constituent of ribosome;P:translation	AT3G48960_RPL13C;AT3G49010_RPL13B;AT5G23900_RPL13D	0	0	0	0	0	0	0	0	0	0
A0A287QUE3					0	0	0	0	0	1	0	0	0	0	0	0	0	0	0	0	0	0	1	0	0	0	0	1	0	1	1	HORVU7Hr1G067280			NA	A0A287QUE3	IPR001351|Ribosomal protein S3, C-terminal;IPR004044|K Homology domain, type 2;IPR005703|Ribosomal protein S3, eukaryotic/archaeal;IPR009019|K homology domain superfamily, prokaryotic type;IPR015946|K homology domain-like, alpha/beta;IPR018280|Ribosomal protein S3, conserved site;IPR036419|Ribosomal protein S3, C-terminal domain superfamily	C:ribosome;C:small ribosomal subunit;F:RNA binding;F:structural constituent of ribosome;P:translation	AT2G31610_RPS3A;AT3G53870_RPS3B;AT5G35530_RPS3C	0	0	0	0	0	0	0	0	0	0
A0A287WV12					0	0	0	0	0	0	0	0	0	0	0	0	-1	0	0	-1	-1	-1	0	0	4	2	1	1	1	3	4	HORVU7Hr1G072650	HORVU.MOREX.r3.7HG0701250	Dihydrolipoamide acetyltransferase component of pyruvate dehydrogenase complex	NA	A0A287WUW0;A0A287WUW5;A0A287WUX5;A0A287WV07;A0A287WV12;A0A287WV55;A0A287WV64;A0A287WV72	IPR000089|Biotin/lipoyl attachment;IPR001078|2-oxoacid dehydrogenase acyltransferase, catalytic domain;IPR003016|2-oxo acid dehydrogenase, lipoyl-binding site;IPR004167|Peripheral subunit-binding domain;IPR011053|Single hybrid motif;IPR023213|Chloramphenicol acetyltransferase-like domain superfamily;IPR036625|E3-binding domain superfamily	C:mitochondrion;F:ATP binding;F:transferase activity;F:transferase activity, transferring acyl groups	AT3G52200_LTA3	0	0	0	0	0	0	0	0	0	0
A0A287WVK2					0	0	0	0	0	0	0	0	0	0	0	1	0	0	0	0	0	0	0	1	0	0	0	1	0	1	1	HORVU7Hr1G073460	HORVU.MOREX.r3.7HG0702290	Tryptophan synthase	NA	A0A287WVJ6;A0A287WVK1;A0A287WVK2;A0A287WVK8;A0A287WVN7;A0A287WVP2;A0A287WVS5;A0A287WVS9;A0A287WVT4;A0A287WVX2;A0A287WVX7;M0XLU3	IPR001926|Pyridoxal-phosphate dependent enzyme;IPR006653|Tryptophan synthase, beta chain, conserved site;IPR006654|Tryptophan synthase, beta chain;IPR023026|Tryptophan synthase beta chain/beta chain-like;IPR036052|Tryptophan synthase beta subunit-like PLP-dependent enzyme;|	C:cytoplasm;F:lyase activity;F:tryptophan synthase activity;P:aromatic amino acid family biosynthetic process;P:cellular amino acid biosynthetic process;P:tryptophan biosynthetic process;P:tryptophan metabolic process	AT4G27070_TSB2;AT5G54810_TSB1	0	0	0	0	0	0	0	0	0	0
A0A287WX12					0	0	1	0	0	0	0	0	0	0	0	0	1	0	0	1	1	0	1	0	3	2	1	1	2	2	4	HORVU7Hr1G074690	HORVU.MOREX.r3.7HG0703580	Glyceraldehyde-3-phosphate dehydrogenase	P26517	A0A287SVR2;A0A287WWX5;A0A287WWY0;A0A287WWZ9;A0A287WX12;A0A287WX17;A0A287WX22;A0A287WX60;A0A287WX66;A0A287WXA1;A0A287WXA5;Q0H425;Q75XW2	IPR006424|Glyceraldehyde-3-phosphate dehydrogenase, type I;IPR020828|Glyceraldehyde 3-phosphate dehydrogenase, NAD(P) binding domain;IPR020829|Glyceraldehyde 3-phosphate dehydrogenase, catalytic domain;IPR020830|Glyceraldehyde 3-phosphate dehydrogenase, active site;IPR020831|Glyceraldehyde/Erythrose phosphate dehydrogenase family;IPR036291|NAD(P)-binding domain superfamily	C:cytoplasm;C:cytosol;F:glyceraldehyde-3-phosphate dehydrogenase (NAD+) (phosphorylating) activity;F:NAD binding;F:NADP binding;F:nucleotide binding;F:oxidoreductase activity;F:oxidoreductase activity, acting on the aldehyde or oxo group of donors, NAD or NADP as acceptor;P:glucose metabolic process;P:glycolytic process;P:oxidation-reduction process		0	0	0	0	0	0	0	0	0	0
A0A287WY19					0	0	0	0	0	0	0	0	0	1	0	1	0	0	0	0	0	0	0	2	0	1	0	1	0	2	2	HORVU7Hr1G075700	HORVU.MOREX.r3.7HG0710810	Reticulon-like protein	NA	A0A287WXZ8;A0A287WY19;A0A287WY93;A0A287WY98;A0A287WYB4;A0A287WYB9;A0A287X2T8;Q306I3	IPR003388|Reticulon;|	C:endoplasmic reticulum;C:endoplasmic reticulum membrane;C:integral component of membrane;C:membrane		0	0	0	0	0	0	0	0	0	0
M0YUL2				Pf13561	0	0	1	0	0	0	0	0	0	0	0	0	1	1	0	0	0	0	1	0	2	1	1	1	3	0	3	HORVU7Hr1G085220	HORVU.MOREX.r3.7HG0714910		NA	A0A287X5L3;A0A287X5L8;A0A287X5M3;A0A287X5M7;A0A287X5M8;A0A287X5N2;A0A287X5N9;A0A287X5P1;A0A287X5P5;A0A287X5T9;A0A287X5U4;A0A287X5X6;A0A287X5Y1;M0YUL2;M0YUL3	IPR002347|Short-chain dehydrogenase/reductase SDR;IPR014358|Enoyl-[acyl-carrier-protein] reductase (NADH);IPR036291|NAD(P)-binding domain superfamily;|	C:integral component of membrane;C:membrane;F:enoyl-[acyl-carrier-protein] reductase (NADH) activity;P:fatty acid biosynthetic process;P:oxidation-reduction process	AT2G05990_MOD1	0	0	0	0	0	0	0	0	0	0
A0A287X6N5					0	-1	0	0	0	0	0	0	-1	0	0	0	0	0	0	0	0	-1	1	1	1	0	1	2	2	1	3	HORVU7Hr1G086520	HORVU.MOREX.r3.7HG0716290	Peptidylprolyl isomerase	NA	A0A287X6I5;A0A287X6I9;A0A287X6J4;A0A287X6J7;A0A287X6M8;A0A287X6N0;A0A287X6N5;A0A287X6N8;A0A287X6P4;A0A287X6R5;A0A287X6R8;A0A287X6S8;A0A287X6W3;A0A287X6W7;A0A287X6X3	IPR001179|FKBP-type peptidyl-prolyl cis-trans isomerase domain;|	F:isomerase activity;F:peptidyl-prolyl cis-trans isomerase activity;P:protein peptidyl-prolyl isomerization	AT3G60370_	0	0	0	0	0	0	0	0	0	0
A0A287X7Y0					0	0	1	0	0	0	0	0	0	0	0	0	1	1	0	0	0	0	1	0	2	1	1	1	3	0	3	HORVU7Hr1G088070			NA	A0A287X7Y0	IPR001892|Ribosomal protein S13;IPR010979|Ribosomal protein S13-like, H2TH;IPR027437|30s ribosomal protein S13, C-terminal	C:cytosol;C:intracellular;C:ribosome;C:small ribosomal subunit;F:nucleic acid binding;F:RNA binding;F:structural constituent of ribosome;P:translation	AT1G22780_RPS18C;AT1G34030_RPS18C;AT4G09800_RPS18C	0	0	0	0	0	0	0	0	0	0
A0A287XAB9					0	0	0	0	0	0	0	0	0	0	0	1	0	-1	0	-1	0	0	0	1	2	1	1	1	1	2	3	HORVU7Hr1G090760	HORVU.MOREX.r3.7HG0720680		NA	A0A287XAB9;A0A287XAE1;A0A287XAF0	IPR005024|Snf7 family	P:vacuolar transport		0	0	0	0	0	0	0	0	0	0
A0A287XHE0					0	0	0	0	0	0	0	0	0	0	0	0	1	0	0	0	0	0	0	0	1	1	0	0	1	0	1	HORVU7Hr1G097250	HORVU.MOREX.r3.7HG0727760		NA	A0A287XH55;A0A287XH63;A0A287XH68;A0A287XHA0;A0A287XHA6;A0A287XHE0;A0A287XHH4;A0A287XHH9;A0A287XHI4	IPR002130|Cyclophilin-type peptidyl-prolyl cis-trans isomerase domain;IPR029000|Cyclophilin-like domain superfamily;|	C:chloroplast;F:peptidyl-prolyl cis-trans isomerase activity;P:protein peptidyl-prolyl isomerization	AT5G35100_	0	0	0	0	0	0	0	0	0	0
M0WSW2	transport		metal ion binding	Pf00403	0	0	0	0	0	0	0	0	0	0	0	0	0	0	0	0	-1	0	0	0	1	0	1	0	0	1	1	HORVU7Hr1G100230	HORVU.MOREX.r3.7HG0730530		NA	A0A287XK39;A0A287XKJ4;M0WSW2	IPR006121|Heavy metal-associated domain, HMA;IPR036163|Heavy metal-associated domain superfamily	C:apoplast;C:cell;C:chloroplast;F:metal ion binding;F:protein domain specific binding;P:cellular copper ion homeostasis;P:metal ion transport;P:response to cadmium ion;P:response to salt stress	AT3G56240_CCH	0	0	0	0	0	0	0	0	0	0
H9N7V6	regulation of biological process	nucleus	DNA binding;protein binding	Pf00808	0	0	0	0	0	0	0	0	0	0	0	0	0	1	1	0	0	0	0	0	2	0	1	1	2	0	2	HORVU7Hr1G105500	HORVU.MOREX.r3.7HG0734470		NA	A0A287XN89;A0A287XNA1;A0A287XNF3;A0A287XNK1;A0A287XNM1;F2DAQ6;H9N7V6	IPR003956|Transcription factor, NFYB/HAP3, conserved site;IPR003958|Transcription factor CBF/NF-Y/archaeal histone domain;IPR009072|Histone-fold	C:nucleus;F:protein heterodimerization activity;F:sequence-specific DNA binding;P:positive regulation of transcription, DNA-templated;P:regulation of transcription, DNA-templated	AT5G47640_NFYB2	0	0	0	0	0	0	0	0	0	0
F2D2H6	metabolic process		catalytic activity	Pf01055, Pf13802	0	0	0	0	0	1	0	0	0	0	0	0	0	0	0	0	0	0	1	0	0	0	0	1	0	1	1	HORVU7Hr1G106540	HORVU.MOREX.r3.7HG0735650	Alpha-glucosidase	Q43763	A0A287XP04;A0A287XP09;A0A287XP15;A0A287XP20;A0A287XP35;A0A287XP40;A0A287XP45;A0A287XP50;A0A287XP88;A0A287XP93;A0A287XP96;A0A287XPA1;A0A287XPA8;A0A287XPE0;A0A287XPF3;A0A287XPF8;A0A287XPG3;A0A287XPH1;F2D2H6;M0Y8T5;M0Y8U0;Q9LLY2	IPR000322|Glycoside hydrolase family 31;IPR011013|Galactose mutarotase-like domain superfamily;IPR013780|Glycosyl hydrolase, all-beta;IPR017853|Glycoside hydrolase superfamily;IPR025887|Glycoside hydrolase family 31, N-terminal domain;IPR030458|Glycosyl hydrolases family 31, active site;IPR030459|Glycosyl hydrolases family 31, conserved site;IPR031727|Galactose mutarotase, N-terminal barrel;|	F:alpha-1,4-glucosidase activity;F:alpha-glucosidase activity;F:carbohydrate binding;F:catalytic activity;F:hydrolase activity;F:hydrolase activity, acting on glycosyl bonds;F:hydrolase activity, hydrolyzing O-glycosyl compounds;F:maltose alpha-glucosidase activity;P:carbohydrate metabolic process;P:maltose metabolic process;P:metabolic process	AT5G11720_	0	0	0	0	0	0	0	0	0	0
S4Z1A6	metabolic process	ribosome	RNA binding;structural molecule activity	Pf00238	0	0	0	0	-1	0	0	0	0	-1	0	0	0	0	0	0	0	0	1	1	0	1	1	0	0	2	2	HORVU7Hr1G107920		50S ribosomal protein L14, chloroplastic	NA	S4Z1A6	IPR000218|Ribosomal protein L14P;IPR005745|Ribosomal protein L14P, bacterial-type;IPR019972|Ribosomal protein L14P, conserved site;IPR036853|Ribosomal protein L14 superfamily	C:chloroplast;C:large ribosomal subunit;C:mitochondrial large ribosomal subunit;C:plastid;C:ribosome;F:large ribosomal subunit rRNA binding;F:RNA binding;F:rRNA binding;F:structural constituent of ribosome;P:translation	ATCG00780_RPL14	0	0	0	0	0	-1	0	0	0	0
M0Z828			metal ion binding	Pf00036, Pf13202, Pf13405, Pf13499, Pf13833, Pf14658	0	0	0	1	0	1	0	0	0	1	0	1	1	0	1	0	0	0	2	2	2	3	0	3	2	4	6	HORVU7Hr1G113200	HORVU.MOREX.r3.7HG0742370		NA	A0A287XUI6;A0A287XUU3;A0A287XUX7;A0A287XUY2;M0Z827;M0Z828	IPR002048|EF-hand domain;IPR011992|EF-hand domain pair;IPR018247|EF-Hand 1, calcium-binding site	C:centriole;C:centrosome;F:calcium ion binding;P:centriole replication;P:mitotic cell cycle	AT3G50360_CML20;AT4G37010_CEN2	0	0	0	1	0	1	0	0	0	1
A0A287Y2C2					0	0	0	0	0	0	0	0	0	-1	0	0	1	0	0	0	0	0	0	1	1	2	0	0	1	1	2	HORVU7Hr1G122750	HORVU.MOREX.r3.7HG0752790		NA	A0A287Y2C2;A0A287Y2C7;A0A287Y2D7;A0A287Y2E2;A0A287Y2E7;A0A287Y2F3;A0A287Y2F4;A0A287Y2G0;A0A287Y2G4;A0A287Y2G9;A0A287Y2H3;A0A287Y2J0;A0A287Y2J4;A0A287Y2J8;A0A287Y2K1;A0A287Y2K3;A0A287Y2K9;A0A287Y2L2;A0A287Y2L4;A0A287Y2Q9	|			0	0	0	-1	0	0	0	0	0	0
[truncated: 17 more columns]

## Sheet: B
Table S5B. Regulation status of proteins and assigned genes expressed differentially in at least one and the same contrast in the experiment
Protein identifier	Annotation			Pfam identifier(s)	Regulation status of DEPs in contrasts D, H, HD v. control [downregulation (-1), upregulation (1), no change (0)]																		Number of significant contrasts in group								Total number of significant contrasts for protein	Gene identifier according to genome assembly version		Gene description	UniProt_SwissProt	UniProt_TrEMBL	Interpro	Gene annotation (GO categores: P - biological process, F - molecular function, C - cellular component)	Ortholog	Regulation status of DEGs in contrasts D, H, HD v. control [downregulation (-1), upregulation (1), no change (0)]
	Biological process	Cellular component	Molecular function
					Small						Medium						Large																							Small						Medium
					T1			T2			T1			T2			T1			T2																				T1			T2			T1			T2
					D	H	HD	D	H	HD	D	H	HD	D	H	HD	D	H	HD	D	H	HD	Small	Medium	Large	D	H	HD	T1	T2										D	H	HD	D	H	HD	D	H	HD	D
																																HORVUv1	HORVUv3 (HORVU.MOREX)
Q40036	metabolic process;regulation of biological process	extracellular	catalytic activity;enzyme regulator activity		1	0	1	1	0	1	1	0	1	1	0	1	1	1	0	0	0	1	4	4	3	5	1	5	6	5	11	HORVU1Hr1G065150	HORVU.MOREX.r3.1HG0066680		NA	M0W4X5;Q40036	IPR000877|Proteinase inhibitor I12, Bowman-Birk;IPR035995|Bowman-Birk type proteinase inhibitor	C:extracellular region;F:serine-type endopeptidase inhibitor activity;P:negative regulation of endopeptidase activity		0	0	0	1	0	1	0	0	1	1
A0A287G4N5					0	0	0	1	0	1	0	0	0	1	0	1	1	1	1	1	0	1	2	2	5	4	1	4	3	6	9	HORVU1Hr1G070690	HORVU.MOREX.r3.1HG0072060	Predicted protein	NA	A0A287G4N5;F2DAA1;Q9FSI8	IPR005247|YbhB/YbcL;IPR008914|Phosphatidylethanolamine-binding protein;IPR036610|PEBP-like superfamily		AT5G01300_	0	0	0	1	0	1	1	0	1	1
O04896	metabolic process		catalytic activity;nucleotide binding	Pf00483	0	0	0	0	0	0	0	0	0	-1	0	0	0	0	0	0	0	1	0	1	1	1	0	1	0	2	2	HORVU1Hr1G091600	HORVU.MOREX.r3.1HG0092020	Glucose-1-phosphate adenylyltransferase	P30524	A0A287GQG8;A0A287GQH5;A0A287GQI6;A0A287GQI7;A0A287GQJ2;A0A287GQK8;A0A287GQK9;A0A287GQL2;A0A287GQL3;A0A287GQL8;A0A287GQL9;A0A287GQM4;C3W8L1;O04896;U5ZZP9;U6A1T2	IPR005835|Nucleotidyl transferase domain;IPR005836|ADP-glucose pyrophosphorylase, conserved site;IPR011004|Trimeric LpxA-like superfamily;IPR011831|Glucose-1-phosphate adenylyltransferase;IPR029044|Nucleotide-diphospho-sugar transferases	C:amyloplast;C:chloroplast;C:plastid;F:ATP binding;F:catalytic activity;F:glucose-1-phosphate adenylyltransferase activity;F:nucleotide binding;F:nucleotidyltransferase activity;F:transferase activity;P:biosynthetic process;P:glycogen biosynthetic process;P:metabolic process;P:starch biosynthetic process	AT1G27680_APL2;AT2G21590_APL4;AT4G39210_APL3	0	0	0	1	0	1	0	0	0	0
F2DH67	metabolic process				0	0	0	-1	0	-1	0	-1	0	0	0	-1	0	0	0	0	0	-1	2	2	1	1	1	3	1	4	5	HORVU2Hr1G079180	HORVU.MOREX.r3.2HG0172200	Predicted protein	NA	A0A287IKK9;A0A287IKL1;F2DH67;M0Y6J0	IPR000489|Pterin-binding domain;|	P:pteridine-containing compound metabolic process		0	0	0	-1	0	0	0	0	0	0
A0A287LIR7					1	1	1	1	0	1	1	0	0	1	0	1	1	1	1	0	0	0	5	3	3	5	2	4	7	4	11	HORVU3Hr1G069650	HORVU.MOREX.r3.3HG0286930		NA	A0A287LIP0;A0A287LIP7;A0A287LIR7	IPR004873|BURP domain		AT5G25610_RD22	0	0	0	1	0	0	0	0	0	0
A0A287P420					0	1	0	1	0	0	0	0	0	1	0	1	0	0	0	0	0	0	2	2	0	2	1	1	1	3	4	HORVU4Hr1G054870	HORVU.MOREX.r3.4HG0383530		NA	A0A287P3W9;A0A287P409;A0A287P420;A0A287P424;A0A287P4B4;M0X653;M0Z8T3	IPR000916|Bet v I/Major latex protein;IPR023393|START-like domain superfamily;IPR024949|Bet v I type allergen	C:cytoplasm;C:nucleus;F:abscisic acid binding;F:protein phosphatase inhibitor activity;F:signaling receptor activity;P:abscisic acid-activated signaling pathway;P:defense response;P:negative regulation of phosphoprotein phosphatase activity;P:regulation of protein serine/threonine phosphatase activity;P:response to biotic stimulus		0	0	0	1	0	0	1	0	0	1
A0A287Q1Q5					0	0	1	0	0	0	0	0	0	0	0	0	0	0	0	0	1	0	1	0	1	0	1	1	1	1	2	HORVU4Hr1G087760	HORVU.MOREX.r3.4HG0415490		NA	A0A287Q1Q5	IPR016140|Bifunctional inhibitor/plant lipid transfer protein/seed storage helical domain;IPR027923|Hydrophobic seed protein domain;IPR036312|Bifunctional inhibitor/plant lipid transfer protein/seed storage helical domain superfamily		AT1G12090_ELP;AT1G62510_;AT4G12470_AZI1;AT4G12480_EARLI1;AT4G12490_;AT4G12500_;AT4G12510_;AT4G12520_;AT4G12545_AIR1B;AT4G12550_AIR1;AT4G22460_;AT5G46890_;AT5G46900_	-1	0	-1	0	0	0	0	0	0	0
M0Y1R9	metabolic process		catalytic activity;metal ion binding;protein binding	Pf00305, Pf01477	0	0	0	-1	0	-1	0	0	0	0	0	0	0	0	0	0	1	0	2	0	1	1	1	1	0	3	3	HORVU5Hr1G001180	HORVU.MOREX.r3.5HG0420500	Lipoxygenase	P93184	A0A287Q6E4;A0A287Q6E7;A0A287Q6F0;A0A287Q6Q8;A0A287Q734;A0A287Q737;M0Y1R9;M0Y1S0	IPR000907|Lipoxygenase;IPR001024|PLAT/LH2 domain;IPR001246|Lipoxygenase, plant;IPR013819|Lipoxygenase, C-terminal;IPR020833|Lipoxygenase, iron binding site;IPR020834|Lipoxygenase, conserved site;IPR027433|Lipoxygenase, domain 3;IPR036226|Lipoxigenase, C-terminal domain superfamily;IPR036392|PLAT/LH2 domain superfamily;IPR042057|Plant lipoxygenase, PLAT/LH2 domain;|	C:chloroplast;C:plastid;F:dioxygenase activity;F:linoleate 13S-lipoxygenase activity;F:metal ion binding;F:oxidoreductase activity;F:oxidoreductase activity, acting on single donors with incorporation of molecular oxygen, incorporation of two atoms of oxygen;F:protein binding;P:fatty acid biosynthetic process;P:fatty acid metabolic process;P:lipid metabolic process;P:oxidation-reduction process;P…		0	0	0	-1	0	-1	0	0	0	0
A0A287S8C1					0	0	0	1	0	1	0	0	0	1	0	0	0	0	0	0	0	0	2	1	0	2	0	1	0	3	3	HORVU5Hr1G092100	HORVU.MOREX.r3.5HG0507390		NA	A0A287S8C1;A0A287S8E1	IPR000167|Dehydrin;IPR030513|Dehydrin, conserved site	C:cytosol;P:cold acclimation;P:response to abscisic acid;P:response to water;P:response to water deprivation		0	0	0	0	0	0	0	0	0	1
A0A287SNX7					0	0	1	0	-1	0	0	0	0	-1	0	-1	1	0	0	0	0	0	2	2	1	2	1	2	2	3	5	HORVU5Hr1G109260		Chlorophyll a-b binding protein, chloroplastic	NA	A0A287SNX4;A0A287SNX7;M0ZEV7	IPR001344|Chlorophyll A-B binding protein, plant;IPR022796|Chlorophyll A-B binding protein;IPR023329|Chlorophyll a/b binding domain superfamily	C:chloroplast;C:chloroplast envelope;C:chloroplast thylakoid membrane;C:integral component of membrane;C:membrane;C:photosystem I;C:photosystem II;C:plastid;C:plastoglobule;C:thylakoid;F:chlorophyll binding;P:photosynthesis;P:photosynthesis, light harvesting;P:photosynthesis, light harvesting in photosystem I;P:protein-chromophore linkage;P:response to light stimulus	AT1G29910_LHCB1.1;AT1G29920_LHCB1.1;AT1G29930_LHCB1.3;AT2G34420_LHB1B2;AT2G34430_LHB1B1	0	0	0	-1	0	-1	0	0	-1	0
A0A287TFZ0					0	0	0	0	0	0	0	0	0	-1	0	0	0	0	0	0	0	0	0	1	0	1	0	0	0	1	1	HORVU6Hr1G016890		Chlorophyll a-b binding protein, chloroplastic	NA	A0A287TFK2;A0A287TFK3;A0A287TFK8;A0A287TFZ0;A0A287TFZ1;M0YS81	IPR001344|Chlorophyll A-B binding protein, plant;IPR022796|Chlorophyll A-B binding protein;IPR023329|Chlorophyll a/b binding domain superfamily	C:chloroplast;C:chloroplast envelope;C:chloroplast thylakoid membrane;C:integral component of membrane;C:membrane;C:photosystem I;C:photosystem II;C:plastid;C:plastoglobule;C:thylakoid;F:chlorophyll binding;P:photosynthesis;P:photosynthesis, light harvesting;P:photosynthesis, light harvesting in photosystem I;P:protein-chromophore linkage;P:response to light stimulus	AT1G29910_LHCB1.1;AT1G29920_LHCB1.1;AT1G29930_LHCB1.3;AT2G34420_LHB1B2;AT2G34430_LHB1B1	0	0	0	-1	0	-1	0	-1	-1	-1
A3RHE3	response to stimulus				1	0	0	0	0	-1	0	0	0	1	0	1	0	1	1	0	0	0	2	2	2	2	1	3	3	3	6	HORVU6Hr1G084070	HORVU.MOREX.r3.6HG0622770	Deyhydrin 4	P12948;P12949	A0A287UZB4;A0A287UZB9;A0A287UZC1;A0A287UZC5;A0A287UZC6;A0A287UZC9;A0A287UZD3;A0A287UZE3;A0A287UZE9;A0A287UZS8;A0A287UZT3;A3RHE3;Q43477;Q9SPA8;Q9SPA9;Q9ZTR6;Q9ZTR7	IPR000167|Dehydrin;IPR030513|Dehydrin, conserved site	C:cytosol;P:cold acclimation;P:response to abscisic acid;P:response to water;P:response to water deprivation		0	0	0	1	0	1	1	0	1	1
F2CWR0	metabolic process	mitochondrion	catalytic activity;nucleotide binding	Pf00389, Pf01408, Pf02826, Pf03720	0	0	0	0	0	0	0	0	0	0	0	1	0	0	0	0	0	0	0	1	0	0	0	1	0	1	1	HORVU7Hr1G047700	HORVU.MOREX.r3.7HG0676800	Formate dehydrogenase, mitochondrial	Q9ZRI8	A0A287WDC4;A0A287WDQ8;F2CWR0;M0Z139	IPR006139|D-isomer specific 2-hydroxyacid dehydrogenase, catalytic domain;IPR006140|D-isomer specific 2-hydroxyacid dehydrogenase, NAD-binding domain;IPR029752|D-isomer specific 2-hydroxyacid dehydrogenase, NAD-binding domain conserved site 1;IPR029753|D-isomer specific 2-hydroxyacid dehydrogenase, NAD-binding domain conserved site;IPR033689|NAD-dependent formate dehydrogenase;IPR036291|NAD(P)-bi…	C:chloroplast;C:formate dehydrogenase complex;C:mitochondrion;F:formate dehydrogenase (NAD+) activity;F:NAD binding;F:oxidoreductase activity;F:oxidoreductase activity, acting on the CH-OH group of donors, NAD or NADP as acceptor;P:formate catabolic process;P:oxidation-reduction process	AT5G14780_FDH1	0	0	0	1	0	1	0	0	0	1
M0Z828			metal ion binding	Pf00036, Pf13202, Pf13405, Pf13499, Pf13833, Pf14658	0	0	0	1	0	1	0	0	0	1	0	1	1	0	1	0	0	0	2	2	2	3	0	3	2	4	6	HORVU7Hr1G113200	HORVU.MOREX.r3.7HG0742370		NA	A0A287XUI6;A0A287XUU3;A0A287XUX7;A0A287XUY2;M0Z827;M0Z828	IPR002048|EF-hand domain;IPR011992|EF-hand domain pair;IPR018247|EF-Hand 1, calcium-binding site	C:centriole;C:centrosome;F:calcium ion binding;P:centriole replication;P:mitotic cell cycle	AT3G50360_CML20;AT4G37010_CEN2	0	0	0	1	0	1	0	0	0	1
[truncated: 17 more columns]
