# Supplementary material for: Global Proteome Profiling Revealed the Adaptive Reprogramming of Barley Flag Leaf to Drought and Elevated Temperature
Source: Cells. 2023 Jun 22;12(13):1685. doi: 10.3390/cells12131685 (PMC10340373; doi:10.3390/cells12131685)
Supplement: Supplementary file 1 [file cells-12-01685-s001.zip › Table S6.xlsx]

## Sheet: Arkusz1
Table S6. Correlations between genes and proteins whose regulation was affected by stress stimuli; selected pairs with correlation > 0.6
Gene identifier	Protein identifier	Correlation
HORVU0Hr1G007770	F2D3S4	0.712988
HORVU0Hr1G010940	F2D3S4	0.71262
HORVU1Hr1G010210	Q40036	0.638057
HORVU1Hr1G021650	F2E325	0.705336
HORVU1Hr1G075530	F2D3S4	0.630841
HORVU1Hr1G078720	M0USA1	0.617144
HORVU2Hr1G028430	F2D3S4	0.630242
HORVU2Hr1G045120	A0A0S1LGH4	0.63027
HORVU2Hr1G045120	F2D3S4	0.615942
HORVU2Hr1G071270	Q40036	0.62539
HORVU2Hr1G094960	A0A287F007	0.601805
HORVU2Hr1G112280	F2E2M2	0.604833
HORVU3Hr1G000350	F2D3S4	0.622852
HORVU3Hr1G005350	Q40036	0.728579
HORVU3Hr1G054870	F2E2M2	0.60708
HORVU3Hr1G054900	Q40036	0.670593
HORVU3Hr1G054920	F2E067	0.691946
HORVU3Hr1G054920	F2E2M2	0.644131
HORVU3Hr1G067350	Q40036	0.750681
HORVU4Hr1G012470	A0A287EWN1	0.647398
HORVU4Hr1G050930	F2D3S4	0.74666
HORVU4Hr1G076120	F2D3S4	0.612078
HORVU5Hr1G009440	A0A0S1LGH4	0.632085
HORVU5Hr1G023700	A0A0S1LGH4	0.6292
HORVU5Hr1G073740	A0A287EWN1	0.626024
HORVU5Hr1G077120	F2E2M2	0.610912
HORVU5Hr1G084980	Q40036	0.608466
HORVU5Hr1G104080	F2D3S4	0.619574
HORVU5Hr1G104080	Q40036	0.601639
HORVU6Hr1G022370	F2E2M2	0.665667
HORVU6Hr1G027760	F2E2M2	0.624794
HORVU6Hr1G064190	Q40036	0.721932
HORVU6Hr1G075590	Q40036	0.620069
HORVU6Hr1G083020	Q40036	0.645797
HORVU7Hr1G002300	F2E2M2	0.634945
HORVU7Hr1G002300	F2D334	0.627685
HORVU7Hr1G027810	Q40036	0.62564
HORVU7Hr1G054610	A0A0S1LGH4	0.621538
HORVU7Hr1G083690	F2D3S4	0.697158
HORVU7Hr1G101300	Q40036	0.608019
